# Supplementary material for: FRET kinase sensor development reveals SnRK2/OST1 activation by ABA but not by MeJA and high CO2 during stomatal closure
Source: eLife. 2020 May 28;9:e56351. doi: 10.7554/eLife.56351 (PMC7289597; doi:10.7554/eLife.56351)
Supplement: Figure 1—figure supplement 1—source data 1. [file elife-56351-fig1-figsupp1-data1.xlsx]

## Sheet: Figure 1-figure supplement 1
Figure 1- figure supplement 1A
Ratio	SNACS	SNACS+OST1
Experiment_1	1.84953	2.19587
Experiment_2	2.05154	2.76034
Experiment_3	2.04724	2.75875
Figure 1- figure supplement 1B
Ratio	SNACS	SNACS+OST1D140A
Experiment_1	1.84953	1.81245
Experiment_2	2.05154	1.95117
Experiment_3	2.04724	1.96353
Figure 1- figure supplement 1C
Ratio	SNACSS785A	SNACSS785A+OST1
Experiment_1	1.62752	1.61544
Experiment_2	1.60556	1.53628
Experiment_3	1.61852	1.53877
Figure 1- figure supplement 1D
Ratio	SNACS	SNACS+CPK6	SNACS+SnRK2.3
Experiment_1	1.89923	1.78826	2.13057
Experiment_2	1.85465	1.77829	2.15509
Experiment_3	1.86235	1.77666	2.19235
Figure 1- figure supplement 1E
Wavelength (nm)	SNACS	SNACS+OST1	SNACS+Double OST1
462	176.5	149.5	145
465	254.5	212.5	212.5
468	336.5	285	276
471	394.5	333.5	326
474	433	359	349.5
477	453	371.5	362.5
480	432.5	364	349.5
483	430.5	350.5	341.5
486	391.5	323.5	315.5
489	380	320.5	305
492	375	325	318.5
495	389	328	324.5
498	392	343.5	331
501	409	348.5	335
504	419	367	366.5
507	454	398	390.5
510	476	457	427
513	525	523.5	507
516	613.5	628	613
519	719.5	773.5	760.5
522	831.5	906.5	909
525	887.5	992	1006.5
528	893.5	990.5	1009.5
531	846	954.5	960
534	775.5	867.5	875
537	671.5	780	763
540	594.5	689.5	668
543	535	616.5	587.5
546	479	527	514.5
549	417	461.5	472.5
552	391	430.5	425.5
555	340	390	386.5
558	327.5	372.5	366
