# Supplementary material for: FRET kinase sensor development reveals SnRK2/OST1 activation by ABA but not by MeJA and high CO2 during stomatal closure
Source: eLife. 2020 May 28;9:e56351. doi: 10.7554/eLife.56351 (PMC7289597; doi:10.7554/eLife.56351)
Supplement: Figure 1—source data 2. [file elife-56351-fig1-data2.xlsx]

## Sheet: Figure 1D-F
Figure.1D	Wavelength (nm)	SNACS	SNACS+OST1		Figure.1E	Wavelength (nm)	SNACS	SNACS+OST1D140A		Figure. 1F	Wavelength (nm)	SNACSS785A	SNACSS785A+OST1
	462	176.5	149.5			462	176.5	164			462	164	167
	465	254.5	212.5			465	254.5	246			465	238	231
	468	336.5	285			468	336.5	317.5			468	323	313
	471	394.5	333.5			471	394.5	375.5			471	377	371
	474	433	359			474	433	405			474	411	403
	477	453	371.5			477	453	417.5			477	410	411
	480	432.5	364			480	432.5	403			480	405	395
	483	430.5	350.5			483	430.5	392.5			483	377	381
	486	391.5	323.5			486	391.5	371			486	356	358
	489	380	320.5			489	380	358.5			489	349	333
	492	375	325			492	375	349.5			492	346	345
	495	389	328			495	389	356			495	349	334
	498	392	343.5			498	392	372.5			498	342	350
	501	409	348.5			501	409	375.5			501	361	362
	504	419	367			504	419	406.5			504	378	378
	507	454	398			507	454	423.5			507	393	373
	510	476	457			510	476	439			510	415	385
	513	525	523.5			513	525	481.5			513	444	419
	516	613.5	628			516	613.5	554.5			516	484	458
	519	719.5	773.5			519	719.5	666			519	557	523
	522	831.5	906.5			522	831.5	736.5			522	632	582
	525	887.5	992			525	887.5	797.5			525	654	621
	528	893.5	990.5			528	893.5	786.5			528	647	623
	531	846	954.5			531	846	753.5			531	623	577
	534	775.5	867.5			534	775.5	695			534	562	530
	537	671.5	780			537	671.5	612			537	529	488
	540	594.5	689.5			540	594.5	536			540	461	437
	543	535	616.5			543	535	477			543	398	368
	546	479	527			546	479	430.5			546	365	329
	549	417	461.5			549	417	378.5			549	318	294
	552	391	430.5			552	391	340.5			552	293	271
	555	340	390			555	340	314.5			555	270	259
	558	327.5	372.5			558	327.5	303.5			558	237	218
