# Supplementary material for: FRET kinase sensor development reveals SnRK2/OST1 activation by ABA but not by MeJA and high CO2 during stomatal closure
Source: eLife. 2020 May 28;9:e56351. doi: 10.7554/eLife.56351 (PMC7289597; doi:10.7554/eLife.56351)
Supplement: Figure 2—source data 1. [file elife-56351-fig2-data1.xlsx]

## Sheet: Sheet1
Figure 2A		Normalized ratio												Figure 2B		Normalized ratio
	Time (min)	cell_1	cell_2	cell_3	cell_4	cell_5	cell_6	cell_7	cell_8	cell_9	cell_10	cell_11			Time (min)	cell_1	cell_2	cell_3	cell_4	cell_5	cell_6	cell_7		Figure 2C	Time (min)	cell_1(ratio)
	0.1	1.00626	1.00271	0.998304	0.995442	1.00551	0.994375	1.00306	1.01613	0.995818	0.993471	0.992464			0.1	0.999982	1.01103	0.997717	1.0017	0.993316	1.01831	0.986611			0.1	0.995818
	0.2	1.00715	1.00524	1.00075	0.997796	1.00587	0.996616	1.00998	1.01714	1.00045	0.992882	0.987035			0.2	1.00087	1.01422	1.00057	0.998265	1.00259	1.01686	0.993791			0.2	1.00045
	0.3	1.00092	1.00229	1.00034	1.00203	1.00264	0.994375	1.00252	1.01512	1.00045	0.991114	0.990835			0.3	0.999089	1.01103	0.993913	0.999124	1.00082	1.0154	0.992524			0.3	1.00045
	0.4	1.00626	1.00693	1.00075	0.999209	1.00802	0.994936	1.00519	1.00955	0.993243	0.991703	0.994636			0.4	0.997304	1.01331	0.996766	1.00041	1.00656	1.01442	0.990413			0.4	0.993243
	0.5	1.0027	1.0065	1.00197	0.99968	0.998695	0.989334	1.00465	1.00905	0.986035	0.999953	0.991921			0.5	0.998643	1.01649	0.998668	1.00256	1.00259	1.0188	0.995903			0.5	0.986035
	0.6	1.00626	1.00566	1.00116	0.998738	0.999412	0.997177	1.00306	1.01259	0.999422	0.996417	0.994093			0.6	1.00445	1.01786	0.999144	0.999983	0.996848	1.0188	1.00351			0.6	0.999422
	0.7	1.00181	1.00018	1.00034	1.00109	1.00336	0.991574	1.00039	1.01461	0.999422	0.998185	0.99355			0.7	1.00177	1.01103	1.00675	0.997835	1.00656	1.01686	1.009			0.7	0.999422
	0.8	1.00671	1.0065	1.00197	0.995913	1.00085	0.993255	1.00625	1.01714	0.994273	0.998774	0.994636			0.8	0.999089	1.01103	0.996291	1.0017	1.00303	1.01686	1.009			0.8	0.994273
	0.9	1.00003	1.00313	1.00157	0.997796	1.00156	0.989894	1.00359	1.00905	0.997362	0.99465	0.997893			0.9	1.00087	1.0083	0.99534	0.999983	1.00259	1.01588	1.01618			0.9	0.997362
	1	1.00314	1.00229	0.998711	0.995442	0.99475	0.984292	1.00412	1.00449	0.994788	0.997007	0.995179			1	0.999089	1.00603	1.00723	1.00299	1.00435	1.01734	1.00731			1	0.994788
	1.1	1.00537	1.00524	0.996672	0.993087	0.995109	0.993815	1.00199	1.00905	0.992213	0.996417	0.994093			1.1	1.00132	1.00558	1.01056	0.995258	1.00612	1.01199	1.01913			1.1	0.992213
	1.2	1.00314	1.0006	0.998711	1.00015	1.00192	0.998297	1.00093	1.01006	0.987579	0.998185	1.00278			1.2	0.99775	1.00921	1.00438	0.999124	1.00656	1.01005	1.0128			1.2	0.987579
	1.3	1.00136	1.00186	0.999527	0.997796	0.998695	0.991574	1.00199	1.00804	0.991184	1.00113	1.00604			1.3	1.00087	1.0083	1.00818	0.999553	1.00259	1.00956	0.998015			1.3	0.991184
	1.4	1.00359	1.00693	0.999119	0.993558	0.996543	0.992695	1.00252	1.00601	0.989124	0.999364	1.00115			1.4	1.00534	1.0074	1.002	1.0017	1.00524	1.00616	1.00182			1.4	0.989124
	1.5	1.00404	1.00608	0.999527	0.998267	0.998336	0.996616	1.00093	1.00804	0.995303	0.997596	0.998979			1.5	1.00311	1.00467	1.00152	0.998694	0.999497	1.0081	0.993369			1.5	0.995303
	1.6	1.00092	1.00313	0.997896	0.998267	1.00336	0.997737	0.999329	1.00399	0.996333	1.0029	0.993007			1.6	1.00087	1.0083	1.00152	0.996976	1.00303	1.00567	0.99168			1.6	0.996333
	1.7	1.00136	1.00524	0.998711	0.99968	0.997619	0.996616	1.00465	1.00399	1.00869	1.00172	1.00224			1.7	1.00177	1.00558	1.00961	0.999124	1.00038	1.00956	0.994214			1.7	1.00869
	1.8	0.993345	1.00229	0.998304	0.999209	0.995109	0.994375	1.00199	1.00551	1.00457	0.999364	0.998436			1.8	1.00043	1.0033	1.00866	0.996117	0.999055	1.00859	0.996326			1.8	1.00457
	1.9	0.99869	1.0006	1.00116	0.994029	1.00013	1.0011	0.997732	1.00652	0.998392	1.00113	0.997893			1.9	1.00623	1.00421	1.00295	0.997835	0.997289	1.00956	0.992524			1.9	0.998392
	2	0.997354	1.00229	0.997896	0.995913	1.00443	1.00054	0.99507	1.00045	1.00354	0.997007	0.998979			2	1.00534	1.0033	1.01294	1.00643	0.993316	1.00421	0.993369			2	1.00354
	2.1	0.995127	1.00186	0.998711	1.00345	1.00156	0.998857	0.999862	1.00348	0.992213	1.00231	0.996265			2.1	1.00087	1.00421	1.00675	1.00041	0.998614	0.996917	0.992102			2.1	0.992213
	2.2	0.997799	0.998912	0.999527	0.996855	1.00407	1.00334	0.999329	1.00753	0.995303	1.00231	1.00387			2.2	1.00266	0.999209	0.999144	1.00342	0.999497	0.995944	0.995481			2.2	0.995303
	2.3	1.00003	0.998912	1.00157	1.00015	1.00443	1.0011	1.00678	0.997409	1.00045	1.00113	0.997893			2.3	0.999089	1.00148	0.999144	0.997835	0.995523	1.00567	0.998437			2.3	1.00045
	2.4	1.00493	0.999333	0.999527	1.00674	1.00694	1.00614	0.999862	0.998421	1.00354	1.00054	0.999522			2.4	0.995518	0.997844	1.00438	1.00084	0.997731	1.00081	0.998437			2.4	1.00354
	2.5	0.992454	1.0006	0.999935	0.998738	1.00192	1.00278	1.00093	0.998421	0.992213	0.995239	0.998436			2.5	0.999536	0.999209	1.00723	0.99354	1.0017	1.00129	0.996326			2.5	0.992213
	2.6	0.996463	0.998068	0.999527	1.00015	0.998336	1.00502	0.99507	0.995385	1.00045	0.996417	0.997893			2.6	0.999536	1.00239	1.00295	0.993969	0.998172	1.00373	0.989568			2.6	1.00045
	2.7	0.9929	0.990897	1.00116	1.00156	0.999412	1.01062	0.994537	0.990831	0.991184	1.00349	1.00061			2.7	1.00221	0.99557	1.00438	1.00127	1.00082	0.997403	0.992947			2.7	0.991184
	2.8	0.993345	0.997224	0.998711	1.00062	1.00192	1.0067	0.998797	0.997915	1.00097	1.00113	1.00224			2.8	1.00266	0.997389	1.00533	0.996976	0.999938	0.993513	1.00562			2.8	1.00097
	2.9	0.996909	1.00144	1.00075	1.00392	0.998336	1.00558	0.996135	0.994373	0.995818	1.00408	0.998436			2.9	1.00489	0.998754	1.00247	0.996117	0.995082	0.99254	1.01491			2.9	0.995818
	3	1.00003	1.00144	1.00157	1.00109	0.997978	1.00614	0.996667	0.996397	1.00303	1.00231	0.998979			3	0.998196	0.998754	1.00105	1.0017	0.999497	0.996431	1.00731			3	1.00303
	3.1	0.996909	0.998068	0.999935	1.00533	0.99475	1.0067	0.997732	0.994373	0.995818	1.00526	1.00007			3.1	1.00266	0.994661	1.01341	1.00084	1.00303	0.993513	1.00435			3.1	0.995818
	3.2	0.992454	0.997224	1.00238	1.00156	0.998695	1.00838	0.997732	0.993361	0.998907	0.997007	1.00115			3.2	1.00087	0.99557	1.0058	0.998694	1.0017	1.00373	1.00731			3.2	0.998907
	3.3	1.00537	0.999755	1.00197	1.00486	0.998695	1.00726	0.998797	0.992349	1.00303	0.999953	1.00169			3.3	0.999536	0.996935	0.997717	1.00299	1.00391	0.992054	1.00604			3.3	1.00303
	3.4	1.00047	0.996802	1.00157	1.00439	0.998336	1.00502	0.999329	0.997915	1.00148	1.00113	1.00061			3.4	0.99775	0.989658	1.00247	1.00213	0.999497	0.98865	1.00604			3.4	1.00148
	3.5	0.9929	0.994271	1.00279	1.00251	0.994033	1.00782	1.00039	0.990324	1.002	1.00349	1.00332			3.5	1.00043	0.993296	0.997717	1.00256	0.993758	0.993999	1.00519			3.5	1.002
	3.6	0.996909	1.00102	0.997896	0.998738	0.997978	0.999978	0.99507	0.989818	1.00509	0.998774	1.00658			3.6	0.994625	0.988748	0.998668	0.999983	0.994641	0.996917	1.00773			3.6	1.00509
	3.7	0.995572	0.993006	1.00116	1.00156	1.00264	1.0067	1.00093	0.992349	1.01178	1.00172	1.00495			3.7	0.998643	0.993751	0.993913	1.00084	0.997731	0.999835	1.00646			3.7	1.01178
	3.8	0.989781	0.99849	0.999119	0.999209	0.999771	1.00446	0.9972	0.988806	0.995818	1.00054	1.00115			3.8	0.99775	0.991022	0.994864	0.995258	0.996406	0.992054	1.00013			3.8	0.995818
	3.9	1.00092	0.998068	1.00401	1.00627	0.996543	1.00614	0.999329	0.9883	1.00251	1.00408	1.00712			3.9	0.992393	0.994661	0.991535	1.00213	0.997289	0.987677	0.999704			3.9	1.00251
	4	0.999581	0.994693	0.99708	0.99968	0.998336	1.0039	0.999329	0.991337	1.00715	1.00172	0.997893			4	0.995518	0.992841	0.995815	1.00213	0.995523	0.981355	0.997593			4	1.00715
	4.1	0.996463	0.993428	0.999935	0.998738	0.994392	1.00054	0.9972	0.987288	1.00972	0.999364	1.00224			4.1	0.999536	0.991022	0.986304	1.00471	0.996848	0.982814	1.00604			4.1	1.00972
	4.2	1.00181	0.995959	1.00157	1.00156	0.992957	1.00446	0.998264	0.9883	1.00869	1.00526	1.00061			4.2	1.00087	0.991932	0.992486	0.997835	1.00744	0.984759	1.00477			4.2	1.00869
	4.3	0.997799	0.99849	0.996672	0.994971	0.993674	1.00278	0.9972	0.992349	1.01332	0.999953	1.00712			4.3	1.00177	0.990113	0.992962	1.00127	0.999497	0.986218	0.996326			4.3	1.01332
	4.4	0.998245	0.991319	0.996672	1.00015	0.99726	1.00334	0.998264	0.997409	1.00045	1.00349	1.00169			4.4	0.999536	0.990113	0.994864	1.00385	1.00347	0.989622	1.00182			4.4	1.00045
	4.5	1.0027	0.996381	0.998711	0.99968	0.993674	0.999978	0.999329	0.995385	1.00972	1.00231	1.00875			4.5	0.998643	0.988293	0.996291	0.999553	1.00126	0.982328	0.994636			4.5	1.00972
	4.6	1.0076	0.994271	0.996672	1.00062	0.999771	1.00166	0.994537	0.991843	1.00766	1.00408	1.01038			4.6	0.993286	0.992387	0.9825	0.999124	1.00347	0.981355	0.999282			4.6	1.00766
	4.7	0.99869	0.99174	0.999119	0.999209	0.991881	0.999978	0.9972	0.990324	1.00509	1.00408	1.01038			4.7	0.998643	0.988293	0.996766	0.999124	0.998172	0.983787	0.989568			4.7	1.00509
	4.8	1.00136	0.994693	1.00238	0.99968	0.992957	1.00166	0.998264	0.992349	1.00869	1.00231	1.00549			4.8	0.999536	0.990113	0.99106	0.998694	0.997289	0.977951	0.995058			4.8	1.00869
	4.9	0.997799	1.00608	1.00931	1.00816	1.02164	0.994375	1.00039	0.989818	1.00457	1.00231	1.00604			4.9	0.998196	0.988293	0.989633	1.00127	0.995965	0.986218	0.991257			4.9	1.00457
	5	1.00626	1.00186	0.996672	1.00674	1.01519	0.999417	0.995602	0.989312	1.00097	1.00526	1.00278			5	1.00043	0.98329	0.997717	1.00557	0.994199	0.977951	0.992102			5	1.00097
	5.1	1.01027	1.00102	0.99341	0.993558	1.01662	0.982051	1.04245	0.981722	1.01487	1.00231	1.00767			5.1	0.995964	0.981471	0.992011	0.996976	0.998172	0.970657	0.992524			5.1	1.01487
	5.2	1.02096	0.994271	0.990963	1.00015	1.01698	0.999417	0.986019	0.982734	1.02826	1.00349	1.00224			5.2	0.991947	0.987384	0.990584	1.00471	0.999938	0.970657	0.993791			5.2	1.02826
	5.3	1.01918	0.992162	0.995449	1.00345	1.0177	1.00502	0.98176	0.981722	1.02877	1.00643	1.03427			5.3	1.00221	0.987384	0.993913	1.00342	1.00126	0.999835	0.99717			5.3	1.02877
	5.4	1.02274	0.997646	0.993818	1.00345	1.02164	1.00614	0.98176	0.979192	1.03032	1.01174	1.03861			5.4	0.995518	0.987384	0.996766	1.00857	0.995523	1.00859	0.992102			5.4	1.03032
	5.5	1.02408	0.993006	0.994225	1.00109	1.01913	1.00614	0.982292	0.984252	1.02362	1.01881	1.04458			5.5	0.999089	0.991477	0.990584	1.00256	0.995523	1.00081	0.98999			5.5	1.02362
	5.6	1.02854	0.988366	0.995449	1.00062	1.01913	1.0095	0.98176	0.981722	1.02877	1.02529	1.02395			5.6	1.004	0.986474	0.994864	1.00428	0.997289	1.00616	0.985344			5.6	1.02877
	5.7	1.01784	0.999333	0.995041	1.00109	1.0238	1.00502	0.982292	0.983746	1.02259	1.02942	1.0397			5.7	0.998643	0.98329	0.998193	0.997835	0.99155	1.00956	0.988723			5.7	1.02259
	5.8	1.01963	0.99385	0.996672	0.998267	1.02308	1.00726	0.987084	0.981722	1.02362	1.03472	1.03536			5.8	0.998196	0.988748	0.998193	0.995258	0.991992	1.01151	0.980699			5.8	1.02362
	5.9	1.0272	0.99385	0.999119	1.00203	1.02487	1.00838	0.985487	0.985264	1.02156	1.03	1.0359			5.9	0.993732	0.985564	0.996291	0.994399	0.996406	1.01296	0.980276			5.9	1.02156
	6	1.02052	0.99385	0.992594	1.00015	1.02953	0.998857	0.980695	0.974131	1.02517	1.03295	1.03264			6	0.996411	0.9842	1.00152	0.997835	0.993758	1.00518	0.983233			6	1.02517
	6.1	1.01517	0.999333	0.997896	1.00156	1.02559	1.00278	0.983889	0.980204	1.02826	1.03531	1.03916			6.1	0.999982	0.984655	0.996766	0.997406	0.991109	1.00518	0.982388			6.1	1.02826
	6.2	1.01562	0.995959	0.992186	1.00015	1.022	1.01174	0.980162	0.977673	1.02517	1.04356	1.03264			6.2	0.998196	0.98329	0.996766	1.00299	0.998614	1.00032	0.9845			6.2	1.02517
	6.3	1.01384	0.995959	0.991779	1.00109	1.02236	1.00334	0.984422	0.979192	1.01899	1.03708	1.03427			6.3	0.995518	0.9842	1.00866	1.00084	0.986694	1.00275	0.9845			6.3	1.01899
	6.4	1.01428	0.982882	0.993818	1.00203	1.02093	1.00166	0.982292	0.977167	1.02156	1.03943	1.03318			6.4	0.998196	0.976923	0.99534	0.998265	0.993758	1.00275	0.986189			6.4	1.02156
	6.5	1.00983	0.996381	0.993002	1.00203	1.02164	0.998297	0.98176	0.975143	1.00972	1.04356	1.02938			6.5	0.99775	0.982836	0.994864	0.997406	0.995523	1.0047	0.9845			6.5	1.00972
	6.6	1.01205	0.995537	0.994225	1.00345	1.02702	1.00334	0.981227	0.975143	1.01847	1.04179	1.03155			6.6	0.996857	0.978288	1.00961	0.993969	0.995523	0.999348	0.979854			6.6	1.01847
	6.7	1.01027	0.994271	0.995857	1.00345	1.0238	1.00502	0.981227	0.976661	1.01693	1.0412	1.02667			6.7	0.999536	0.980562	1.00913	0.999124	0.989343	0.998862	0.982388			6.7	1.01693
	6.8	1.00849	0.993428	0.997896	0.995913	1.01806	1.00446	0.982825	0.975143	1.01332	1.03708	1.03047			6.8	0.993732	0.985564	1.00105	1.00213	0.991109	1.00567	0.983233			6.8	1.01332
	6.9	1.01651	0.987522	0.994225	1.00251	1.02451	1.00446	0.981227	0.975649	1.00406	1.0412	1.01907			6.9	0.995964	0.977833	1.002	1.00299	0.990226	0.996431	0.980699			6.9	1.00406
	7	1.00938	0.991319	0.996265	0.998738	1.02164	1.00222	0.982825	0.971601	1.00921	1.04474	1.02667			7	0.993286	0.976468	1.0039	1.00041	0.993758	0.984273	0.98281			7	1.00921
	7.1	1.00983	0.999333	0.995041	1.00486	1.02487	1.00166	0.983357	0.977167	1.00509	1.04179	1.02558			7.1	0.999536	0.976923	0.999144	0.997835	0.989784	0.982328	0.98281			7.1	1.00509
	7.2	1.00582	0.994271	0.997896	1.00486	1.02093	1.0039	0.987084	0.980204	1.00818	1.03943	1.02287			7.2	0.995518	0.978742	0.998668	0.990533	0.995523	0.988163	0.977742			7.2	1.00818
	7.3	1.00849	0.998912	0.996265	1.00674	1.0177	1.00502	0.976968	0.975649	1.01075	1.03943	1.01907			7.3	0.995964	0.975559	1.00438	0.996546	0.994199	0.985246	0.981543			7.3	1.01075
	7.4	1.02141	0.995959	0.999527	1.00533	1.01627	1.00614	0.979098	0.975649	1.01075	1.04415	1.0321			7.4	0.997304	0.974649	1.00342	1.00213	0.997731	0.97552	0.979432			7.4	1.01075
	7.5	1.0125	0.992162	0.995449	1.01098	1.01913	1.00278	0.979098	0.973625	1.01178	1.04238	1.02233			7.5	0.994179	0.969191	1.00485	0.996976	0.996406	0.97017	0.981543			7.5	1.01178
	7.6	1.02141	1.00271	0.991779	1.00957	1.02021	1.0011	0.981227	0.972107	1.02311	1.04238	1.0207			7.6	0.9915	0.97374	1.0058	0.996976	0.998172	0.976979	0.977742			7.6	1.02311
	7.7	1.01651	0.994693	0.994633	1.01004	1.01411	1.0011	0.980162	0.976661	1.01487	1.04356	1.02287			7.7	0.996411	0.969646	1.00247	0.994828	0.997289	0.970657	0.980699			7.7	1.01487
	7.8	1.02007	0.994271	1.00197	1.01381	1.01878	1.00614	0.978033	0.977673	1.01023	1.03825	1.02341			7.8	0.995964	0.968737	1.00961	0.997835	0.995082	0.973088	0.981543			7.8	1.01023
	7.9	1.01517	0.99174	0.996672	1.01381	1.01949	1.00278	0.979098	0.977673	1.00457	1.03354	1.01472			7.9	0.999536	0.975104	1.00913	0.990962	0.999055	0.964335	0.983655			7.9	1.00457
	8	1.02185	0.996381	0.997896	1.01428	1.01555	1.00334	0.978565	0.977167	1.01435	1.03766	1.02178			8	0.993732	0.969191	1.01198	0.994399	0.998614	0.96628	0.97563			8	1.01435
	8.1	1.0223	0.993428	1.00075	1.01569	1.01519	1.00446	0.975371	0.976661	1.01384	1.03766	1.0283			8.1	0.993286	0.972375	1.01056	0.996546	0.995965	0.964821	0.981966			8.1	1.01384
	8.2	1.02052	0.992584	1.00564	1.01946	1.01519	1.00894	0.98176	0.983746	1.01332	1.03531	1.02124			8.2	0.995072	0.970556	1.01246	0.999983	1.00435	0.95315	0.980276			8.2	1.01332
	8.3	1.02764	0.99385	1.0032	1.01616	1.01017	1.00614	0.98176	0.979698	1.01281	1.03236	1.02667			8.3	0.990607	0.97283	1.00533	0.999124	1.00082	0.963848	0.980699			8.3	1.01281
	8.4	1.02408	0.997224	1.0036	1.02322	1.0116	1.00894	0.975371	0.981216	1.00972	1.04061	1.02341			8.4	0.993286	0.97283	1.0077	1.00041	0.999055	0.958499	0.981121			8.4	1.00972
	8.5	1.02943	1.00018	1.00442	1.02228	1.01196	1.00782	0.982292	0.983746	1.0056	1.04002	1.02504			8.5	1.00132	0.973285	1.00675	0.994828	1.00391	0.961903	0.978164			8.5	1.0056
	8.6	1.02453	0.996381	1.00809	1.02322	1.00623	1.00558	0.978033	0.989818	1.02105	1.03943	1.02395			8.6	0.992839	0.975104	1.00723	0.993969	1.00303	0.960931	0.981121			8.6	1.02105
	8.7	1.01517	0.992162	1.00524	1.02887	1.0073	1.00222	0.980162	0.991337	1.01384	1.03236	1.02504			8.7	0.992839	0.97283	1.0058	0.995258	1.00391	0.948287	0.983233			8.7	1.01384
	8.8	1.02453	0.990053	1.00972	1.02652	1.01125	1.00558	0.978565	0.994373	1.02259	1.03943	1.02233			8.8	0.9915	0.971011	1.01008	0.998694	1.00038	0.948773	0.973096			8.8	1.02259
	8.9	1.01874	0.993006	1.01013	1.03217	1.00479	1.0067	0.973241	0.992349	1.02877	1.03943	1.02993			8.9	0.993286	0.971465	1.00485	0.994399	0.999497	0.952663	0.974786			8.9	1.02877
	9	1.02274	0.996381	1.01176	1.0284	1.00192	1.0039	0.978033	0.992855	1.02259	1.03825	1.01798			9	0.9915	0.971011	1.01389	1.0017	0.999938	0.944396	0.973519			9	1.02259
	9.1	1.02096	0.996802	1.01298	1.02982	1.00264	1.00502	0.976436	0.991843	1.01899	1.04356	1.02721			9.1	0.995964	0.968282	1.00723	0.999124	0.996848	0.951205	0.980276			9.1	1.01899
	9.2	1.02052	1.00018	1.01462	1.03264	1.00049	1.00894	0.980162	0.995891	1.02362	1.04532	1.01961			9.2	0.993732	0.975104	1.00723	1.00557	0.997289	0.944883	0.976053			9.2	1.02362
	9.3	1.02453	0.998068	1.01543	1.04018	1.00156	1.01118	0.976436	0.994373	1.02362	1.0465	1.02558			9.3	0.992839	0.968737	1.01056	1.0017	0.994641	0.942451	0.976475			9.3	1.02362
	9.4	1.01294	0.987944	1.01298	1.03829	1.00587	1.01006	0.978565	0.999939	1.0262	1.05416	1.0207			9.4	0.994625	0.969191	1.00485	1.01416	0.993316	0.941479	0.976475			9.4	1.0262
	9.5	1.01918	0.994693	1.01543	1.04536	1.00623	1.00838	0.973774	0.999939	1.02929	1.05122	1.02938			9.5	0.990161	0.968737	1.0077	1.01072	0.988901	0.946342	0.973519			9.5	1.02929
	9.6	1.01963	0.999755	1.01951	1.04912	1.01053	1.01006	0.978033	1.00095	1.02671	1.05299	1.02395			9.6	0.988375	0.971465	0.99962	1.01459	0.99155	0.9478	0.983233			9.6	1.02671
	9.7	1.01562	0.993428	1.0191	1.04724	1.00551	1.01566	0.980162	1.00196	1.03238	1.05357	1.0283			9.7	0.991054	0.973285	1.00105	1.01674	0.993316	0.951691	0.977742			9.7	1.03238
	9.8	1.02052	0.992162	1.02603	1.05666	1.00623	1.01622	0.975903	1.00449	1.02929	1.05593	1.03101			9.8	0.994625	0.964643	1.00342	1.01845	0.995523	0.944883	0.979854			9.8	1.02929
	9.9	1.02319	0.994693	1.02603	1.05101	1.00802	1.01398	0.979098	0.997409	1.0298	1.0577	1.03427			9.9	0.996411	0.966008	1.00438	1.01588	0.994199	0.948287	0.981966			9.9	1.0298
	10	1.02185	0.998068	1.0293	1.05807	1.00623	1.01006	0.980162	1.00551	1.03238	1.05004	1.0359			10	0.994625	0.969646	1.00723	1.01674	0.992433	0.946342	0.980699			10	1.03238
	10.1	1.01562	0.996802	1.0297	1.05571	1.00443	1.02015	0.973241	1.00045	1.03135	1.05004	1.04187			10.1	0.998643	0.969646	0.999144	1.02103	0.98846	0.952177	0.987034			10.1	1.03135
	10.2	1.01651	0.995115	1.03215	1.06231	1.0073	1.02015	0.982825	1.00247	1.03238	1.05534	1.04024			10.2	0.994625	0.965098	1.0077	1.02404	0.984487	0.956068	0.985767			10.2	1.03238
	10.3	1.01829	1.00018	1.0346	1.0656	1.00443	1.0179	0.9775	1.00551	1.03701	1.05063	1.03916			10.3	0.991054	0.969646	1.0077	1.0249	0.983604	0.952177	0.9845			10.3	1.03701
	10.4	1.0272	0.99849	1.03582	1.06654	1.00372	1.02071	0.980162	1.01107	1.04113	1.05593	1.04187			10.4	1.00043	0.97192	1.00152	1.02704	0.990667	0.958013	0.983233			10.4	1.04113
	10.5	1.01784	1.00229	1.04153	1.07267	1.00515	1.01622	0.980162	1.00551	1.04885	1.05711	1.0397			10.5	1.00311	0.968737	1.00961	1.02447	0.984487	0.964821	0.984922			10.5	1.04885
	10.6	1.01874	0.997224	1.04153	1.07596	1.0012	1.02463	0.978033	1.00298	1.04113	1.05829	1.04133			10.6	0.995518	0.964189	1.00533	1.02747	0.982721	0.956554	0.980276			10.6	1.04113
	10.7	1.01473	1.00355	1.04479	1.07738	1.00874	1.02239	0.97963	1.00196	1.04164	1.06123	1.04513			10.7	0.994179	0.965553	1.0039	1.0249	0.980955	0.959472	0.982388			10.7	1.04164
	10.8	1.0174	0.992584	1.04602	1.08208	1.00264	1.02015	0.97963	1.00905	1.04988	1.05593	1.04187			10.8	0.995964	0.968737	1.00628	1.02876	0.985811	0.957526	0.983655			10.8	1.04988
	10.9	1.01384	0.999755	1.04602	1.08632	1.00658	1.01902	0.976968	1.01613	1.04782	1.05711	1.04947			10.9	0.997304	0.967827	0.998668	1.02747	0.984487	0.961903	0.982388			10.9	1.04782
	11	1.01963	1.00355	1.05173	1.09244	1.00049	1.02295	0.976968	1.00601	1.05143	1.06123	1.04187			11	0.999536	0.965553	1.00342	1.0322	0.985811	0.963362	0.9845			11	1.05143
	11.1	1.02141	0.99849	1.05091	1.09621	1.00156	1.02239	0.98176	1.01006	1.05349	1.0577	1.04078			11.1	1.00087	0.969191	1.00295	1.02447	0.990226	0.960444	0.981543			11.1	1.05349
	11.2	1.02141	1.00144	1.05458	1.09998	1.003	1.02575	0.978565	1.01057	1.05555	1.06359	1.0435			11.2	0.998643	0.978742	0.997242	1.03134	0.989784	0.958013	0.992102			11.2	1.05555
	11.3	1.01072	1.00355	1.05458	1.10798	1.00264	1.03023	0.974306	1.00449	1.05864	1.06241	1.04676			11.3	0.999536	0.974649	0.999144	1.02275	0.984045	0.960444	0.988723			11.3	1.05864
	11.4	1.02007	1.0065	1.05703	1.10704	1.00228	1.03023	0.97963	1.00652	1.06121	1.063	1.04133			11.4	0.997304	0.971465	0.994864	1.02146	0.98846	0.963362	0.993791			11.4	1.06121
	11.5	1.02675	1.0044	1.06314	1.11599	1.00407	1.03079	0.980162	1.00146	1.0643	1.06477	1.0473			11.5	0.995518	0.971011	0.994864	1.02962	0.989343	0.959958	0.993369			11.5	1.0643
	11.6	1.01784	0.999333	1.06437	1.11363	1.01125	1.02855	0.9775	1.01259	1.06275	1.06889	1.04839			11.6	0.996411	0.970101	0.992486	1.02447	0.990226	0.958499	0.999704			11.6	1.06275
	11.7	1.0223	1.01114	1.06763	1.12117	1.00874	1.03079	0.983357	1.00804	1.0643	1.06889	1.05327			11.7	0.994625	0.966008	0.998193	1.02232	0.987577	0.959958	0.997593			11.7	1.0643
	11.8	1.02141	1.00861	1.06845	1.13106	1.00802	1.03023	0.98176	1.00702	1.06996	1.06948	1.04893			11.8	0.996857	0.969646	0.997242	1.02232	0.98537	0.964335	1.00139			11.8	1.06996
	11.9	1.02052	1.00693	1.07089	1.132	1.00802	1.03191	0.983357	1.00652	1.07254	1.07243	1.04839			11.9	0.995964	0.973285	0.99534	1.02361	0.992875	0.963362	1.00984			11.9	1.07254
	12	1.02497	1.00693	1.07212	1.13624	1.00587	1.03863	0.980695	1.01158	1.07408	1.07302	1.04241			12	0.994625	0.965553	0.994864	1.01931	0.985811	0.959472	1.00984			12	1.07408
	12.1	1.02141	1.00271	1.0766	1.13765	1.00372	1.03807	0.982292	1.00247	1.07563	1.07597	1.04513			12.1	0.999982	0.970556	1.00057	1.02876	0.986694	0.967739	1.01364			12.1	1.07563
	12.2	1.01784	1.00904	1.07701	1.1433	1.00049	1.03807	0.987084	1.00196	1.0679	1.07538	1.05164			12.2	1.00177	0.966917	0.991535	1.01674	0.988018	0.958013	1.01575			12.2	1.0679
	12.3	1.02542	1.0044	1.07701	1.1433	1.00264	1.03583	0.978565	1.00247	1.07048	1.07125	1.0473			12.3	0.999982	0.968737	1.0001	1.02361	0.98537	0.963362	1.00984			12.3	1.07048
	12.4	1.02854	1.00355	1.0819	1.14801	1.00407	1.03807	0.987616	1.00399	1.07511	1.06948	1.0473			12.4	0.999089	0.969191	0.999144	1.02103	0.988018	0.963848	1.01787			12.4	1.07511
	12.5	1.02854	1.00313	1.08639	1.1579	1.00587	1.04031	0.990278	1.00045	1.07202	1.07891	1.04458			12.5	0.99775	0.969646	0.997717	1.02275	0.990226	0.957526	1.01406			12.5	1.07202
	12.6	1.02586	1.01325	1.08353	1.16072	1.00658	1.04816	0.984954	1.00348	1.08541	1.07714	1.0587			12.6	1.00132	0.970101	0.996766	1.02447	0.99155	0.958499	1.01787			12.6	1.08541
	12.7	1.02319	1.01114	1.08068	1.15648	1.01053	1.03583	0.986551	1.00196	1.08593	1.08422	1.05219			12.7	0.991054	0.965098	0.994388	1.0206	0.987135	0.963848	1.00688			12.7	1.08593
	12.8	1.01294	1.00904	1.08557	1.16637	1.00551	1.04255	0.990811	1.01057	1.08798	1.0795	1.05219			12.8	0.994625	0.970101	1.0001	1.02576	0.988901	0.960931	1.01069			12.8	1.08798
	12.9	1.01517	1.00693	1.08476	1.15742	1.00587	1.04367	0.993473	1.00551	1.09519	1.07891	1.05327			12.9	0.999089	0.966463	0.998668	1.02404	0.986694	0.966766	1.01195			12.9	1.09519
	13	1.02141	1.00693	1.08476	1.16496	1.00264	1.04535	0.992408	1.00399	1.09313	1.08304	1.05056			13	0.999982	0.967372	1.00533	1.01974	0.985811	0.964821	1.00984			13	1.09313
	13.1	1.01339	1.0065	1.08802	1.17155	1.00407	1.04648	0.993473	1.00804	1.08696	1.09011	1.05381			13.1	0.999982	0.965098	0.998193	1.02017	0.987577	0.969684	1.01026			13.1	1.08696
	13.2	1.01428	1.00946	1.08598	1.17626	1.01376	1.04928	0.986019	1.00652	1.10189	1.08834	1.05273			13.2	0.996857	0.967827	0.996766	1.01674	0.985811	0.969684	1.00266			13.2	1.10189
	13.3	1.01695	1.00861	1.08313	1.17909	1.00085	1.04535	0.991343	1.00955	1.09674	1.08952	1.05273			13.3	0.997304	0.967827	0.995815	1.01373	0.984487	0.96628	1.00266			13.3	1.09674
	13.4	1.01517	1.00735	1.08965	1.1805	1.00372	1.04535	0.990811	1.01057	1.09828	1.0907	1.05219			13.4	1.00087	0.964189	0.994864	1.01974	0.987577	0.973088	1.00731			13.4	1.09828
	13.5	1.01517	1.00946	1.09169	1.18097	1.00658	1.05376	0.997732	1.00955	1.10343	1.09011	1.05056			13.5	0.99775	0.970101	0.996291	1.01716	0.980072	0.966766	1.01322			13.5	1.10343
	13.6	1.01606	1.00735	1.0872	1.18568	1.00372	1.05488	0.998264	1.00854	1.1024	1.09541	1.05544			13.6	0.999089	0.968282	1.00152	1.01974	0.978306	0.968225	1.00731			13.6	1.1024
	13.7	1.01384	1.0065	1.0868	1.18568	1.00443	1.05656	0.995602	1.01208	1.1024	1.10012	1.0549			13.7	1.00043	0.964643	1.0001	1.02103	0.981396	0.967252	1.00308			13.7	1.1024
	13.8	1.01695	1.01494	1.08884	1.18615	1.00479	1.05992	0.99507	1.00854	1.10652	1.09541	1.0473			13.8	0.99775	0.964643	0.996766	1.01674	0.984928	0.971629	1.00562			13.8	1.10652
	13.9	1.01874	1.01368	1.0872	1.19368	1.00838	1.06104	0.998264	1.005	1.10189	1.09659	1.0511			13.9	0.995072	0.963734	0.997717	1.02017	0.984928	0.969684	1.00139			13.9	1.10189
	14	1.02007	1.01241	1.0872	1.19651	1.00587	1.06608	0.995602	1.00652	1.10343	1.09482	1.05599			14	0.997304	0.962824	0.990108	1.0206	0.983604	0.974547	1.00435			14	1.10343
	14.1	1.0174	1.01325	1.08843	1.19227	0.999771	1.06496	0.995602	1.00854	1.10858	1.10366	1.05544			14.1	0.993732	0.963734	1.0039	1.01459	0.980955	0.972602	0.999704			14.1	1.10858
	14.2	1.01517	1.01241	1.09128	1.19133	1.00264	1.07	0.994537	1.00449	1.10755	1.09541	1.05544			14.2	1.00087	0.962824	1.00485	1.02017	0.982721	0.976492	0.993791			14.2	1.10755
	14.3	1.01874	1.01157	1.08924	1.19557	1.00264	1.06664	1.00039	1.00955	1.09622	1.09836	1.05436			14.3	0.9915	0.964189	1.002	1.01845	0.975657	0.965794	0.99717			14.3	1.09622
	14.4	1.01829	1.01241	1.09087	1.1951	0.998695	1.07673	0.9972	1.00702	1.10446	1.09423	1.05273			14.4	0.999536	0.957366	0.99534	1.02232	0.97654	0.970657	0.996326			14.4	1.10446
	14.5	1.01606	1.01325	1.08843	1.1951	0.999412	1.06944	1.00039	1.01158	1.11167	1.09541	1.05381			14.5	0.994625	0.961915	1.0001	1.02146	0.983162	0.965307	0.998437			14.5	1.11167
	14.6	1.01829	1.02169	1.09373	1.20027	0.997619	1.07224	0.999862	1.00399	1.10086	1.09954	1.05653			14.6	0.9915	0.958731	1.0039	1.01287	0.982279	0.967252	0.994636			14.6	1.10086
	14.7	1.01205	1.01874	1.09169	1.20216	1.00049	1.07561	1.00465	1.00348	1.10086	1.10248	1.05707			14.7	0.993286	0.96146	0.999144	1.01416	0.979189	0.972602	0.996748			14.7	1.10086
	14.8	1.01695	1.02043	1.08843	1.20075	0.999053	1.07785	1.01264	1.00551	1.1091	1.09777	1.0511			14.8	0.994179	0.962369	1.00342	1.01158	0.98537	0.968711	0.994636			14.8	1.1091
	14.9	1.01695	1.01916	1.0872	1.2064	0.997619	1.07393	1.00732	1.00652	1.11219	1.09541	1.05327			14.9	0.994179	0.960095	1.00342	1.01674	0.985811	0.971143	0.992102			14.9	1.11219
	15	1.01562	1.01325	1.09251	1.20027	0.995109	1.07729	1.00785	1.00399	1.09983	1.10189	1.05219			15	0.995072	0.955092	1.00247	1.01201	0.980955	0.966766	0.987456			15	1.09983
	15.1	1.01784	1.01705	1.09373	1.20027	0.993316	1.07224	1.00944	1.00652	1.10086	1.09718	1.05599			15.1	0.997304	0.957366	1.00866	1.01545	0.982721	0.960444	0.992947			15.1	1.10086
	15.2	1.0076	1.01916	1.09699	1.2031	0.999412	1.08121	1.00891	1.00449	1.0988	1.10071	1.05219			15.2	0.998196	0.961005	1.01056	1.01545	0.98537	0.967739	0.992947			15.2	1.0988
	15.3	1.01339	1.01832	1.09291	1.20451	0.99475	1.08569	1.01743	1.01158	1.09725	1.09836	1.05544			15.3	0.988375	0.964189	1.01198	1.01502	0.989343	0.971143	0.98999			15.3	1.09725
	15.4	1.00448	1.02211	1.09128	1.20875	0.994392	1.08625	1.0137	1.00551	1.09519	1.1013	1.0549			15.4	0.993732	0.961915	1.0058	1.02404	0.985811	0.967252	0.98999			15.4	1.09519
	15.5	1.0076	1.01663	1.09332	1.20734	0.99475	1.08625	1.0137	1.00551	1.10395	1.09541	1.05273			15.5	0.987929	0.959641	1.0077	1.01931	0.987577	0.973574	0.988723			15.5	1.10395
	15.6	1.00181	1.02	1.09332	1.21111	0.997978	1.09017	1.00944	1.00702	1.09571	1.10484	1.05436			15.6	0.993732	0.96146	1.01626	1.01459	0.978306	0.963848	0.993791			15.6	1.09571
	15.7	0.99379	1.01958	1.09781	1.20451	0.993316	1.09185	1.01424	1.005	1.08798	1.10012	1.05327			15.7	0.995072	0.959641	1.01341	1.01459	0.976099	0.96628	0.992102			15.7	1.08798
	15.8	1.00181	1.01789	1.09577	1.20545	0.990088	1.09185	1.0137	1.00449	1.08696	1.10071	1.05164			15.8	0.990607	0.96146	1.01008	1.02747	0.983604	0.960444	0.992102			15.8	1.08696
	15.9	1.00404	1.01958	1.09618	1.20593	0.993674	1.09745	1.01637	1.00652	1.09004	1.10189	1.05707			15.9	0.991054	0.959641	1.01294	1.01545	0.983604	0.961903	0.993369			15.9	1.09004
	16	1.00003	1.02422	1.09658	1.20781	0.994033	1.09689	1.01104	1.00551	1.09416	1.1013	1.05164			16	0.992839	0.962824	1.00913	1.01888	0.974774	0.965794	0.992102			16	1.09416
	16.1	0.991563	1.02422	1.09414	1.20828	0.991164	1.09409	1.00998	1.00551	1.08438	1.09954	1.0587			16.1	0.999089	0.96055	1.01198	1.01588	0.974333	0.962876	0.986611			16.1	1.08438
	16.2	0.992009	1.02169	1.09699	1.20593	0.990088	1.09857	1.01051	1.00551	1.08644	1.09718	1.05762			16.2	0.993732	0.962824	1.01484	1.01158	0.98846	0.958985	0.988301			16.2	1.08644
	16.3	0.994236	1.02127	1.09455	1.2064	0.990088	1.09129	1.01743	1.00399	1.0921	1.10189	1.05653			16.3	0.992393	0.964189	1.01103	1.01502	0.97654	0.965794	0.981966			16.3	1.0921
	16.4	0.995127	1.01958	1.09332	1.21158	0.990088	1.10026	1.00998	1.005	1.09107	1.1013	1.05816			16.4	0.994625	0.966917	1.01389	1.01244	0.97963	0.962389	0.988301			16.4	1.09107
	16.5	1.00003	1.02169	1.09536	1.20498	0.984351	1.09241	1.01583	1.00753	1.09313	1.0907	1.05653			16.5	0.996857	0.968737	1.01056	1.01588	0.980955	0.959958	0.991257			16.5	1.09313
	16.6	0.995572	1.02591	1.09251	1.2064	0.98973	1.09745	1.01583	1.00045	1.09519	1.10366	1.05924			16.6	0.989268	0.963734	1.01341	1.01845	0.982721	0.967252	0.980699			16.6	1.09519
	16.7	0.994681	1.02296	1.09536	1.20734	0.990806	1.09633	1.01637	1.00045	1.08644	1.09836	1.05979			16.7	0.995964	0.964643	1.02102	1.01931	0.981396	0.966766	0.983655			16.7	1.08644
	16.8	0.999136	1.02211	1.09455	1.21063	0.996185	1.10922	1.0169	1.005	1.08901	1.096	1.06033			16.8	0.992839	0.961915	1.01484	1.01716	0.984045	0.96628	0.986189			16.8	1.08901
	16.9	0.996909	1.0238	1.09781	1.2031	0.988654	1.10642	1.02435	1.01006	1.08747	1.09836	1.06576			16.9	0.992839	0.967827	1.01817	1.01716	0.986694	0.958499	0.981966			16.9	1.08747
	17	0.995127	1.02886	1.09781	1.20027	0.990088	1.10362	1.0169	0.999433	1.09159	1.09364	1.06467			17	0.994179	0.960095	1.01246	1.0133	0.98537	0.962389	0.981966			17	1.09159
	17.1	0.995572	1.02844	1.09699	1.20169	0.989371	1.11986	1.02222	1.00854	1.08798	1.09777	1.0663			17.1	0.991947	0.958276	1.0077	1.01459	0.986253	0.966766	0.979432			17.1	1.08798
	17.2	0.996909	1.02591	1.09577	1.20122	0.988295	1.11146	1.02222	0.998421	1.09107	1.1013	1.06467			17.2	0.994179	0.956457	1.01389	1.01459	0.986253	0.965307	0.979432			17.2	1.09107
	17.3	1.0027	1.03055	1.10025	1.20357	0.988654	1.11314	1.01956	1.00348	1.08335	1.10307	1.06847			17.3	0.995518	0.957821	1.00818	1.01588	0.980072	0.970657	0.980699			17.3	1.08335
	17.4	1.00537	1.02127	1.09699	1.20404	0.984351	1.11258	1.02488	1.00449	1.08953	1.10307	1.06793			17.4	0.987929	0.958276	1.01103	1.01502	0.984928	0.968711	0.985344			17.4	1.08953
	17.5	1.00359	1.02633	1.09781	1.1998	0.985068	1.10978	1.02968	1.00298	1.08644	1.10602	1.06467			17.5	0.993286	0.958731	1.01103	1.02189	0.987577	0.961417	0.98281			17.5	1.08644
	17.6	0.997354	1.02717	1.09169	1.20922	0.980406	1.11594	1.03553	0.999939	1.08953	1.10425	1.0663			17.6	0.9915	0.958731	1.01294	1.01716	0.982721	0.965307	0.985767			17.6	1.08953
	17.7	0.999136	1.03013	1.09495	1.20357	0.984709	1.11482	1.02808	1.00146	1.07975	1.09659	1.07282			17.7	0.9915	0.964189	1.00866	1.01631	0.98846	0.966766	0.974786			17.7	1.07975
	17.8	1.00003	1.02591	1.09332	1.20075	0.991881	1.1221	1.02914	0.998927	1.07769	1.09954	1.07607			17.8	0.993732	0.962369	1.00913	1.01888	0.984487	0.969198	0.977742			17.8	1.07769
	17.9	0.993345	1.02971	1.0974	1.20216	0.98722	1.11594	1.035	0.999433	1.07769	1.10425	1.06847			17.9	0.992839	0.962824	1.00533	1.01931	0.985811	0.963848	0.978164			17.9	1.07769
	18	1.00493	1.02971	1.09618	1.20027	0.989013	1.1137	1.04299	1.005	1.08284	1.1013	1.0701			18	0.9915	0.967827	1.01056	1.0133	0.982279	0.964335	0.974786			18	1.08284
	18.1	1.00938	1.03519	1.09332	1.20122	0.987937	1.1081	1.03979	1.00348	1.08541	1.10012	1.06576			18.1	0.993732	0.966463	1.0039	1.01459	0.989343	0.961903	0.96845			18.1	1.08541
	18.2	1.00849	1.03139	1.09455	1.20687	0.988295	1.1165	1.04245	1.00196	1.08232	1.10189	1.06956			18.2	0.993286	0.968737	1.00675	1.01201	0.982721	0.967252	0.976897			18.2	1.08232
	18.3	1.00715	1.03266	1.09251	1.20451	0.984351	1.11986	1.04405	1.00045	1.07202	1.10307	1.06739			18.3	0.9915	0.976468	1.00295	1.01845	0.97963	0.962876	0.969295			18.3	1.07202
	18.4	1.00671	1.02928	1.09985	1.20498	0.986502	1.11538	1.04884	0.999939	1.07048	1.10307	1.07499			18.4	0.994179	0.97374	0.999144	1.01588	0.984487	0.959958	0.978164			18.4	1.07048
	18.5	1.00404	1.03266	1.09455	1.20216	0.986861	1.1221	1.04991	1.00146	1.07408	1.10366	1.07336			18.5	0.994625	0.97192	1.0001	1.01158	0.984928	0.960931	0.973941			18.5	1.07408
	18.6	1.00314	1.03519	1.09862	1.20404	0.984351	1.12546	1.04778	1.00804	1.06945	1.10661	1.07173			18.6	0.994625	0.973285	1.00628	1.01931	0.989784	0.955095	0.977742			18.6	1.06945
	18.7	1.01072	1.02675	1.09822	1.2031	0.985068	1.1221	1.04938	1.00095	1.07305	1.09954	1.0701			18.7	0.995964	0.970101	1.00438	1.00771	0.984045	0.961903	0.973519			18.7	1.07305
	18.8	1.00047	1.02844	1.09699	1.19839	0.982916	1.12322	1.05736	1.00095	1.07048	1.09718	1.06467			18.8	0.993732	0.970556	1.00866	1.01631	0.984928	0.964335	0.977742			18.8	1.07048
	18.9	1.00849	1.03013	1.09822	1.20357	0.986502	1.1249	1.05576	1.00196	1.07357	1.10307	1.07227			18.9	0.996857	0.977833	1.00533	1.01588	0.982279	0.963362	0.979009			18.9	1.07357
	19	1.01027	1.03477	1.09699	1.20075	0.984709	1.12771	1.05896	1.00449	1.07614	1.09777	1.06956			19	0.987036	0.974194	1.00438	1.01502	0.98537	0.972602	0.98281			19	1.07614
	19.1	1.00671	1.03477	1.10107	1.20357	0.985068	1.12771	1.05736	1.00146	1.07151	1.1013	1.0701			19.1	0.993286	0.974194	1.00247	1.01201	0.982279	0.968225	0.975208			19.1	1.07151
	19.2	1.01205	1.04025	1.09822	1.19839	0.984709	1.12771	1.06109	0.999939	1.07563	1.10248	1.06902			19.2	0.98659	0.967827	1.00342	1.01759	0.98537	0.967739	0.981966			19.2	1.07563
	19.3	1.00849	1.02886	1.09495	1.20263	0.982558	1.1249	1.06269	1.00298	1.07666	1.09954	1.06522			19.3	0.993732	0.974649	1.00485	1.01545	0.983162	0.964821	0.984922			19.3	1.07666
	19.4	1.00537	1.03561	1.09373	1.20498	0.980406	1.13555	1.06428	1.00045	1.07357	1.10248	1.0701			19.4	0.993286	0.97283	1.0058	1.01588	0.984045	0.957526	0.988301			19.4	1.07357
	19.5	1.00938	1.03688	1.09862	1.19792	0.979689	1.13443	1.06375	1.00753	1.06996	1.10425	1.0701			19.5	0.990161	0.971011	1.00152	1.01287	0.984045	0.963362	0.990835			19.5	1.06996
	19.6	1.01072	1.03392	1.09944	1.19792	0.984351	1.13443	1.06162	1.00095	1.06687	1.10189	1.06847			19.6	0.985697	0.974194	1.00533	1.00943	0.987577	0.964335	0.995481			19.6	1.06687
	19.7	1.01473	1.03646	1.09332	1.19886	0.977179	1.13835	1.06269	1.00146	1.07408	1.1013	1.05816			19.7	0.992839	0.969646	1.0077	1.01072	0.988018	0.964335	0.998015			19.7	1.07408
	19.8	1.01473	1.03519	1.10229	1.20451	0.986861	1.13835	1.06269	1.00298	1.0679	1.10012	1.0663			19.8	0.987482	0.971465	1.00961	1.01545	0.985811	0.962876	1.00435			19.8	1.0679
	19.9	1.01116	1.03603	1.09944	1.19839	0.978255	1.13779	1.0712	0.995891	1.06893	1.096	1.07065			19.9	0.989714	0.971011	1.0058	1.01545	0.984045	0.971629	1.00604			19.9	1.06893
	20	1.00804	1.04827	1.09903	1.20075	0.977537	1.13835	1.06322	0.997915	1.06584	1.10012	1.06413			20	0.988822	0.968282	1.0077	1.02404	0.98537	0.962876	1.00984			20	1.06584
	20.1	1.01651	1.0335	1.10107	1.19462	0.981841	1.14059	1.06748	1.00045	1.06327	1.09364	1.06576			20.1	0.993732	0.971011	1.01008	1.01072	0.983604	0.964821	1.00646			20.1	1.06327
	20.2	1.01473	1.03603	1.09781	1.19886	0.983634	1.13667	1.06854	0.995891	1.06739	1.09895	1.06902			20.2	0.994179	0.97283	0.99962	1.02146	0.980955	0.965307	1.00773			20.2	1.06739
	20.3	1.01072	1.0432	1.10066	1.20216	0.982558	1.13443	1.0712	0.994373	1.07614	1.09777	1.06576			20.3	0.9915	0.97283	1.002	1.01244	0.976099	0.967739	1.01111			20.3	1.07614
	20.4	1.01384	1.03688	1.10189	1.19792	0.985785	1.13779	1.06961	0.999433	1.0679	1.096	1.0777			20.4	0.992839	0.962824	1.00533	1.01029	0.980955	0.971629	1.01364			20.4	1.0679
	20.5	1.01072	1.03477	1.10352	1.19086	0.981841	1.13723	1.06801	0.997409	1.06945	1.10484	1.06956			20.5	0.995518	0.965553	1.00675	1.01158	0.983162	0.963362	1.01955			20.5	1.06945
	20.6	1.00938	1.0373	1.10433	1.19792	0.987578	1.13723	1.07174	1.00095	1.06481	1.10366	1.06522			20.6	0.988822	0.964643	1.00152	1.01459	0.974333	0.969198	1.01449			20.6	1.06481
	20.7	1.01205	1.03983	1.10311	1.19133	0.984709	1.13835	1.07227	0.997409	1.06275	1.10602	1.0701			20.7	0.993286	0.969646	1.0039	1.00814	0.980513	0.976492	1.01744			20.7	1.06275
	20.8	1.01161	1.04152	1.10107	1.19745	0.986144	1.13779	1.07706	1.00399	1.05658	1.1013	1.06522			20.8	0.991054	0.966917	1.0058	1.00213	0.973891	0.968711	1.01829			20.8	1.05658
	20.9	1.0125	1.03435	1.10107	1.19274	0.982558	1.14003	1.07546	1.00298	1.05091	1.10543	1.07445			20.9	0.995072	0.962369	1.002	1.01072	0.974333	0.964335	1.01913			20.9	1.05091
	21	1.01829	1.03899	1.09862	1.1951	0.985068	1.14283	1.07014	1.00045	1.05915	1.10602	1.07227			21	0.994179	0.96146	1.00961	1.01115	0.981396	0.963362	1.01406			21	1.05915
	21.1	1.02185	1.04531	1.09781	1.19321	0.982558	1.14843	1.07866	1.00045	1.05606	1.10307	1.07282			21.1	0.992839	0.963734	1.00533	1.01416	0.972125	0.964821	1.01744			21.1	1.05606
	21.2	1.02542	1.03814	1.09944	1.18803	0.985785	1.14955	1.08132	0.998421	1.06739	1.10484	1.07282			21.2	0.999982	0.963279	1.00961	1.009	0.97654	0.966766	1.01829			21.2	1.06739
	21.3	1.01784	1.04194	1.10392	1.18756	0.986144	1.14787	1.07653	0.997915	1.05606	1.10543	1.07445			21.3	0.999536	0.96055	1.00723	1.01072	0.974774	0.968225	1.0166			21.3	1.05606
	21.4	1.02185	1.03899	1.09822	1.19698	0.989371	1.14675	1.07759	0.995385	1.05915	1.10602	1.06956			21.4	0.994625	0.959641	1.00628	1.01029	0.970359	0.965794	1.01618			21.4	1.05915
	21.5	1.02052	1.04278	1.10352	1.1918	0.986502	1.14507	1.08238	0.996903	1.04731	1.10248	1.07445			21.5	0.999089	0.961915	1.00723	1.00814	0.974774	0.958985	1.01449			21.5	1.04731
	21.6	1.01918	1.04363	1.09658	1.19227	0.987578	1.1602	1.08345	1.005	1.05452	1.10837	1.07227			21.6	0.999536	0.956457	1.00723	1.01201	0.978747	0.967252	1.02082			21.6	1.05452
	21.7	1.01072	1.04953	1.10025	1.19651	0.989371	1.15348	1.08824	1.00095	1.05246	1.10661	1.07987			21.7	0.995072	0.961915	1.00342	1.00943	0.975216	0.963362	1.02209			21.7	1.05246
	21.8	1.01339	1.04784	1.09495	1.18662	0.982558	1.16356	1.08611	1.00146	1.05246	1.10543	1.08042			21.8	0.999089	0.961005	1.00295	1.01244	0.976982	0.972116	1.01406			21.8	1.05246
	21.9	1.01428	1.0335	1.09536	1.19698	0.987937	1.15011	1.08558	1.00146	1.05761	1.10012	1.0739			21.9	1.00534	0.962824	1.00675	1.00771	0.975657	0.971629	1.01491			21.9	1.05761
	22	1.01384	1.04236	1.09577	1.19792	0.980048	1.15516	1.08505	1.00146	1.05864	1.10543	1.07607			22	0.995964	0.959186	1.002	1.00814	0.975216	0.971629	1.01533			22	1.05864
	22.1	1.02141	1.04405	1.09455	1.19368	0.980048	1.15236	1.08824	1.00449	1.05503	1.10248	1.07825			22.1	1.00221	0.954183	1.00438	1.00857	0.97654	0.972116	1.01026			22.1	1.05503
	22.2	1.02185	1.0411	1.09781	1.19698	0.982558	1.15123	1.08611	1.00753	1.05658	1.09954	1.07879			22.2	1.00445	0.953728	1.002	1.00643	0.974774	0.965794	1.01322			22.2	1.05658
	22.3	1.02408	1.03941	1.09944	1.19698	0.986502	1.15179	1.08345	1.00196	1.05606	1.10189	1.08639			22.3	1.00132	0.956912	1.0001	1.00771	0.976982	0.96628	1.01744			22.3	1.05606
	22.4	1.0174	1.04405	1.09536	1.19839	0.987937	1.15572	1.08984	1.00045	1.05606	1.10012	1.07445			22.4	1.00177	0.952364	1.002	1.01502	0.975657	0.967252	1.00857			22.4	1.05606
	22.5	1.0223	1.04194	1.09862	1.20027	0.98722	1.15852	1.08558	0.997915	1.0607	1.10543	1.08259			22.5	1.00221	0.953273	0.997717	1.00986	0.978747	0.971629	1.01449			22.5	1.0607
	22.6	1.02319	1.03814	1.10107	1.19886	0.986502	1.15964	1.08984	1.00095	1.054	1.09777	1.07987			22.6	1.00177	0.951454	1.00295	1.00557	0.977865	0.960444	1.01406			22.6	1.054
	22.7	1.01606	1.04616	1.09658	1.19462	0.986861	1.15516	1.08984	1.00146	1.05555	1.11014	1.07716			22.7	0.999536	0.953728	1.00105	1.00943	0.97345	0.969684	1.0128			22.7	1.05555
	22.8	1.02631	1.03899	1.09862	1.19839	0.990806	1.1546	1.08771	1.00348	1.05297	1.10484	1.08042			22.8	0.996411	0.952818	0.99962	1.00943	0.97345	0.962876	1.01153			22.8	1.05297
	22.9	1.02096	1.04911	1.0974	1.19415	0.986861	1.15964	1.09516	1.00298	1.05606	1.10837	1.08802			22.9	0.998196	0.953273	1.0058	1.01201	0.974774	0.96628	1.0128			22.9	1.05606
	23	1.02542	1.03941	1.09373	1.1918	0.99224	1.15348	1.08984	0.999939	1.05555	1.09954	1.08259			23	0.994179	0.952364	1.00295	1.00943	0.977423	0.968711	1.01153			23	1.05555
	23.1	1.02497	1.04489	1.09944	1.19651	0.988654	1.16524	1.0909	1.00045	1.05297	1.10071	1.08693			23.1	0.992839	0.952364	0.999144	1.00814	0.977865	0.969198	1.00351			23.1	1.05297
	23.2	1.02675	1.0432	1.09822	1.19886	0.990806	1.1602	1.09037	1.00247	1.05967	1.09954	1.09508			23.2	0.994625	0.957821	1.0039	1.00814	0.972567	0.971143	1.00055			23.2	1.05967
	23.3	1.02453	1.04405	1.09332	1.19321	0.987578	1.16188	1.09676	1.00601	1.05864	1.09364	1.09182			23.3	0.995072	0.95009	1.00057	1.00557	0.969918	0.966766	1.00266			23.3	1.05864
	23.4	1.02764	1.05164	1.09414	1.19651	0.987937	1.15796	1.09037	0.998421	1.05349	1.09954	1.08856			23.4	0.997304	0.945542	1.00295	1.00385	0.969035	0.969684	1.00351			23.4	1.05349
	23.5	1.02408	1.03899	1.09495	1.1918	0.988295	1.16748	1.08558	1.00146	1.05555	1.09482	1.08585			23.5	0.994179	0.949635	1.00342	1.006	0.973008	0.966766	1.00139			23.5	1.05555
	23.6	1.02408	1.04827	1.09822	1.19557	0.988295	1.16132	1.0909	1.00196	1.05194	1.09836	1.0853			23.6	0.99775	0.945996	1.00533	1.00857	0.974333	0.973574	0.99717			23.6	1.05194
	23.7	1.02408	1.04658	1.10066	1.19745	0.988654	1.16188	1.09303	0.999939	1.05555	1.10012	1.09453			23.7	0.992393	0.95009	1.002	1.00557	0.971684	0.974547	1.00351			23.7	1.05555
	23.8	1.02497	1.0432	1.09781	1.19133	0.991881	1.16468	1.09303	0.997409	1.05246	1.09836	1.0891			23.8	0.992839	0.947816	1.0039	1.01201	0.971242	0.972116	1.00266			23.8	1.05246
	23.9	1.02364	1.04489	1.09862	1.19557	0.989013	1.16412	1.09303	0.997409	1.05606	1.09482	1.09073			23.9	0.992393	0.945996	1.01103	1.00213	0.975657	0.975033	1.00224			23.9	1.05606
	24	1.01784	1.04489	1.09822	1.19462	0.987578	1.1658	1.09303	0.992349	1.05709	1.09895	1.08368			24	0.995072	0.949635	1.01008	1.00428	0.973891	0.968711	1.00013			24	1.05709
	24.1	1.02898	1.04574	1.09781	1.19557	0.985785	1.16916	1.09516	0.998421	1.05864	1.1013	1.08802			24.1	0.987929	0.947361	1.01389	1.00299	0.973008	0.97017	0.995903			24.1	1.05864
	24.2	1.01963	1.04827	1.09862	1.19557	0.990447	1.17252	1.09676	0.994373	1.05709	1.09246	1.09128			24.2	0.994179	0.946451	1.00628	1.00771	0.974774	0.968225	1.00013			24.2	1.05709
	24.3	1.01918	1.05249	1.09618	1.1951	0.988654	1.1714	1.09569	0.996397	1.04782	1.09423	1.08802			24.3	0.992839	0.945087	1.01436	1.01029	0.969918	0.968711	0.997593			24.3	1.04782
	24.4	1.01918	1.04194	1.09699	1.1885	0.991523	1.16804	1.09836	0.995891	1.05297	1.09305	1.08476			24.4	0.98659	0.945087	1.00961	1.00557	0.977423	0.974547	0.992947			24.4	1.05297
	24.5	1.0223	1.04531	1.09495	1.19651	0.990088	1.16804	1.09569	0.992855	1.05091	1.08598	1.09508			24.5	0.992393	0.946906	1.0058	1.00643	0.975657	0.968225	0.998437			24.5	1.05091
	24.6	1.02408	1.0432	1.09495	1.19227	0.986502	1.17476	1.09836	0.997915	1.05967	1.0907	1.09182			24.6	0.9915	0.944632	1.01769	1.00557	0.970359	0.967739	0.99886			24.6	1.05967
	24.7	1.02274	1.04616	1.09903	1.19792	0.987578	1.17252	1.09357	0.998927	1.0504	1.0907	1.08042			24.7	0.991947	0.945087	1.00913	1.0017	0.969035	0.978924	0.996326			24.7	1.0504
	24.8	1.01874	1.04574	1.09699	1.19839	0.989013	1.1686	1.09569	0.995385	1.06893	1.09188	1.08965			24.8	0.992393	0.944632	1.01198	1.00342	0.979189	0.976006	0.997593			24.8	1.06893
	24.9	1.02987	1.04531	1.09862	1.20169	0.989013	1.16916	1.10421	0.990324	1.05864	1.09305	1.09291			24.9	0.996411	0.944177	1.00866	1.00643	0.976099	0.974061	1.00393			24.9	1.05864
	25	1.02096	1.04616	1.09822	1.1951	0.987578	1.16972	1.0941	0.995891	1.05555	1.09246	1.09291			25	0.993286	0.944632	1.00961	1.00385	0.97654	0.974547	0.995481			25	1.05555
	25.1	1.02185	1.04447	1.09291	1.19368	0.984351	1.16916	1.09569	0.993867	1.06173	1.09836	1.08639			25.1	0.995072	0.944632	1.01531	1.00428	0.976099	0.973088	0.995481			25.1	1.06173
	25.2	1.02586	1.04489	1.09985	1.19274	0.986861	1.17252	1.10049	0.994373	1.05452	1.09423	1.08802			25.2	0.993732	0.944177	1.01579	1.00256	0.97345	0.974547	0.994636			25.2	1.05452
	25.3	1.02319	1.04784	1.09373	1.19745	0.990806	1.16692	1.09729	0.989312	1.05864	1.09777	1.09453			25.3	0.988822	0.942813	1.00818	1.00084	0.974333	0.974547	0.994636			25.3	1.05864
	25.4	1.0174	1.04405	1.09455	1.20216	0.985785	1.17196	1.09676	0.987794	1.05091	1.09364	1.09291			25.4	0.995518	0.945996	1.01722	1.00385	0.97654	0.976492	0.989146			25.4	1.05091
	25.5	1.02007	1.04489	1.09577	1.19839	0.986502	1.16412	1.09942	0.987794	1.06584	1.09423	1.09453			25.5	0.9915	0.945087	1.01151	1.00514	0.980072	0.973088	0.987456			25.5	1.06584
	25.6	1.02274	1.04447	1.09781	1.19792	0.989013	1.16972	1.10315	0.995385	1.04679	1.09423	1.09345			25.6	0.992393	0.941903	1.02292	1.006	0.975216	0.981355	0.984922			25.6	1.04679
	25.7	1.02631	1.04953	1.09536	1.19839	0.98973	1.16468	1.09729	0.996397	1.05143	1.09364	1.08802			25.7	0.990607	0.942358	1.02197	0.996117	0.978747	0.974061	0.995058			25.7	1.05143
	25.8	1.0272	1.04363	1.09903	1.19839	0.985427	1.16356	1.10528	0.986276	1.05658	1.09777	1.10213			25.8	0.993286	0.941903	1.0253	1.00471	0.979189	0.975033	0.989568			25.8	1.05658
	25.9	1.02631	1.04784	1.09618	1.19886	0.984709	1.16468	1.09303	0.991843	1.05091	1.09659	1.09562			25.9	0.989714	0.944177	1.02578	1.00514	0.977423	0.974061	0.990835			25.9	1.05091
	26	1.03522	1.04278	1.09373	1.19745	0.985068	1.17308	1.10315	0.986782	1.05349	1.09423	1.09399			26	0.991947	0.944177	1.03006	0.999124	0.976982	0.965307	0.986189			26	1.05349
	26.1	1.02809	1.04574	1.09373	1.19557	0.983634	1.16972	1.09782	0.991843	1.05761	1.09246	1.09128			26.1	0.989714	0.946451	1.03386	1.00041	0.974333	0.973574	0.985767			26.1	1.05761
	26.2	1.03433	1.04236	1.09944	1.19462	0.987578	1.16244	1.09995	0.9883	1.05915	1.0907	1.09019			26.2	0.996857	0.946451	1.03624	1.00127	0.972125	0.966766	0.985344			26.2	1.05915
	26.3	1.02542	1.0432	1.09903	1.18992	0.982558	1.16468	1.0941	0.991843	1.05967	1.09541	1.09833			26.3	0.992839	0.944177	1.03624	0.997835	0.971684	0.973574	0.992947			26.3	1.05967
	26.4	1.02542	1.04236	1.10066	1.18992	0.986144	1.1574	1.09569	0.984252	1.05452	1.09423	1.09888			26.4	0.994179	0.946906	1.03386	1.00299	0.978306	0.965307	0.989568			26.4	1.05452
	26.5	1.02007	1.04574	1.09822	1.18992	0.984709	1.15628	1.09836	0.984252	1.05606	1.09011	1.10051			26.5	0.992393	0.943268	1.03576	1.00385	0.980072	0.96628	0.989568			26.5	1.05606
	26.6	1.02052	1.03561	1.09414	1.18992	0.986502	1.1546	1.09942	0.986782	1.06224	1.09364	1.10159			26.6	0.994625	0.945996	1.04242	1.00213	0.978306	0.970657	0.986189			26.6	1.06224
	26.7	1.02764	1.047	1.09128	1.19274	0.983275	1.15796	1.09516	0.991337	1.05246	1.09541	1.09453			26.7	0.991054	0.944632	1.03957	1.00213	0.970801	0.968711	0.991257			26.7	1.05246
	26.8	1.01784	1.04574	1.09495	1.18803	0.981482	1.16356	1.09889	0.986276	1.05709	1.09423	1.10213			26.8	0.989268	0.942358	1.03909	0.995687	0.971242	0.969684	0.987456			26.8	1.05709
	26.9	1.03032	1.04784	1.09332	1.19933	0.985068	1.15404	1.09729	0.985264	1.05452	1.08834	1.09671			26.9	0.991947	0.941448	1.04099	0.997835	0.97345	0.962389	0.979009			26.9	1.05452
	27	1.02764	1.04953	1.09577	1.19274	0.981841	1.1546	1.09516	0.992349	1.06533	1.10543	1.10322			27	0.992839	0.943722	1.03957	0.998694	0.969918	0.973574	0.987456			27	1.06533
	27.1	1.02319	1.04405	1.0921	1.19321	0.982199	1.15516	1.09782	0.981722	1.05812	1.09188	1.10159			27.1	0.992839	0.940084	1.04242	1.00084	0.973891	0.972602	0.985767			27.1	1.05812
	27.2	1.03165	1.04278	1.09332	1.18897	0.985785	1.15292	1.09729	0.98577	1.05761	1.0848	1.09725			27.2	0.994625	0.93781	1.0429	1.00686	0.978306	0.972116	0.980276			27.2	1.05761
	27.3	1.0272	1.0411	1.09251	1.19086	0.988295	1.15292	1.09782	0.981216	1.06224	1.09423	1.10213			27.3	0.990607	0.936445	1.03814	1.00041	0.967711	0.969684	0.982388			27.3	1.06224
	27.4	1.02809	1.04489	1.08924	1.19039	0.983634	1.15796	1.09676	0.986782	1.06275	1.09423	1.09725			27.4	0.990607	0.933717	1.04242	0.994399	0.971242	0.973088	0.981121			27.4	1.06275
	27.5	1.03076	1.04194	1.09291	1.19604	0.981482	1.15964	1.10155	0.982734	1.06018	1.09188	1.09996			27.5	0.98659	0.940993	1.04099	0.992681	0.965503	0.967739	0.981121			27.5	1.06018
	27.6	1.02764	1.04194	1.09373	1.1885	0.977537	1.163	1.09836	0.983746	1.05864	1.08539	1.09833			27.6	0.989714	0.935081	1.04432	0.994828	0.971684	0.976492	0.976897			27.6	1.05864
	27.7	1.02408	1.04405	1.0974	1.18897	0.981123	1.15067	1.09623	0.984758	1.06275	1.08598	1.08802			27.7	0.989268	0.933262	1.03671	0.998265	0.975216	0.976006	0.976475			27.7	1.06275
	27.8	1.02497	1.04447	1.0921	1.20027	0.983634	1.15852	1.09729	0.978179	1.054	1.08598	1.09833			27.8	0.988822	0.930078	1.04099	0.994828	0.966386	0.978924	0.981543			27.8	1.054
	27.9	1.0321	1.03983	1.09414	1.19415	0.981841	1.1546	1.10208	0.985264	1.054	1.08598	1.10268			27.9	0.988375	0.934626	1.03148	0.999124	0.968594	0.976492	0.979009			27.9	1.054
	28	1.03032	1.04025	1.0974	1.19086	0.981482	1.15292	1.09836	0.981216	1.05606	1.0848	1.10431			28	0.987929	0.935991	1.0486	0.998694	0.970359	0.979896	0.9845			28	1.05606
	28.1	1.02987	1.04405	1.09781	1.19415	0.983992	1.1546	1.09569	0.981722	1.05761	1.08422	1.10756			28.1	0.984357	0.934626	1.04052	0.999124	0.969476	0.97941	0.985344			28.1	1.05761
	28.2	1.0321	1.04025	1.09618	1.1918	0.980765	1.14619	1.09144	0.981722	1.07048	1.08834	1.09996			28.2	0.990607	0.934626	1.04242	0.998265	0.966386	0.975033	0.985767			28.2	1.07048
	28.3	1.03611	1.04869	1.09128	1.18992	0.981841	1.15348	1.0941	0.98577	1.05967	1.08716	1.09996			28.3	0.991054	0.935081	1.04242	0.999553	0.969476	0.97552	0.979009			28.3	1.05967
	28.4	1.04012	1.04278	1.09128	1.19462	0.977179	1.14675	1.09463	0.98071	1.06018	1.08834	1.10268			28.4	0.987036	0.931897	1.03576	0.999553	0.967711	0.971629	0.981966			28.4	1.06018
	28.5	1.03566	1.0411	1.09047	1.19368	0.981123	1.15292	1.09676	0.984252	1.05606	1.0848	1.09128			28.5	0.991054	0.929169	1.03434	0.994828	0.966828	0.978437	0.979432			28.5	1.05606
	28.6	1.03477	1.0411	1.09414	1.19321	0.978613	1.1546	1.09676	0.986782	1.05555	1.08363	1.10322			28.6	0.992393	0.932352	1.04147	0.997835	0.962854	0.980383	0.986189			28.6	1.05555
	28.7	1.0272	1.0411	1.09373	1.1885	0.980048	1.15011	1.09836	0.981722	1.05503	1.08775	1.10376			28.7	0.994179	0.928259	1.0429	0.997406	0.965503	0.977465	0.981966			28.7	1.05503
	28.8	1.03522	1.04067	1.08965	1.1918	0.974669	1.15292	1.09303	0.982734	1.05761	1.08657	1.10105			28.8	0.989268	0.934626	1.03909	0.996117	0.965062	0.979896	0.985767			28.8	1.05761
	28.9	1.03923	1.03772	1.09251	1.19274	0.978255	1.15292	1.09623	0.982734	1.05452	1.0848	1.09888			28.9	0.987929	0.933717	1.03006	0.99354	0.959323	0.976006	0.987879			28.9	1.05452
	29	1.02898	1.04236	1.09455	1.18709	0.976103	1.15348	1.09889	0.979698	1.05297	1.08657	1.10702			29	0.9915	0.927804	1.03814	0.995687	0.963737	0.969684	0.981543			29	1.05297
	29.1	1.037	1.047	1.09577	1.18992	0.97431	1.15179	1.09623	0.986276	1.05812	1.07891	1.10159			29.1	0.9915	0.932352	1.03671	0.99311	0.968594	0.976492	0.987034			29.1	1.05812
	29.2	1.03433	1.04616	1.09414	1.18803	0.975744	1.14619	1.09303	0.981722	1.06121	1.08539	1.10594			29.2	0.991947	0.932807	1.02768	0.998265	0.954908	0.978437	0.981543			29.2	1.06121
	29.3	1.0321	1.047	1.09291	1.19227	0.982558	1.14955	1.09303	0.981216	1.05761	1.09129	1.10159			29.3	0.986143	0.930988	1.02387	0.993969	0.96462	0.973574	0.97732			29.3	1.05761
	29.4	1.03477	1.03688	1.09455	1.1918	0.982558	1.15123	1.0925	0.986782	1.05915	1.08245	1.10268			29.4	0.987036	0.927349	1.02482	0.996117	0.959764	0.97017	0.987034			29.4	1.05915
	29.5	1.0321	1.04236	1.09414	1.1885	0.9718	1.14955	1.08931	0.982734	1.05658	1.08598	1.10268			29.5	0.992839	0.92644	1.02625	0.998265	0.95844	0.971629	0.985767			29.5	1.05658
	29.6	1.03477	1.047	1.09373	1.18662	0.971441	1.14675	1.09037	0.980204	1.05606	1.08363	1.10268			29.6	0.993286	0.92644	1.03006	0.996976	0.957557	0.972602	0.976475			29.6	1.05606
	29.7	1.03433	1.04531	1.09169	1.19227	0.978613	1.14395	1.08931	0.985264	1.05503	1.08245	1.10105			29.7	0.989714	0.92462	1.02625	0.991392	0.95844	0.977951	0.974363			29.7	1.05503
	29.8	1.03923	1.0411	1.0921	1.19462	0.975386	1.15123	1.08718	0.981722	1.05606	1.08422	1.10159			29.8	0.987482	0.925075	1.0272	1.00256	0.956232	0.977951	0.976053			29.8	1.05606
	29.9	1.03744	1.04278	1.0921	1.18944	0.97682	1.14843	1.08824	0.984252	1.05503	1.08775	1.10376			29.9	0.987036	0.922346	1.02387	0.999124	0.955349	0.969684	0.972252			29.9	1.05503
	30	1.03923	1.03561	1.09699	1.19321	0.982916	1.14619	1.0909	0.981216	1.05452	1.08539	1.10594			30	0.994179	0.923256	1.01626	0.997835	0.955349	0.9833	0.975208			30	1.05452
