# Supplementary material for: FRET kinase sensor development reveals SnRK2/OST1 activation by ABA but not by MeJA and high CO2 during stomatal closure
Source: eLife. 2020 May 28;9:e56351. doi: 10.7554/eLife.56351 (PMC7289597; doi:10.7554/eLife.56351)
Supplement: Figure 3—source data 1. [file elife-56351-fig3-data1.xlsx]

## Sheet: Sheet1
Figure 3A		Normalized ratio			Figure 3B		Normalized ratio
	Time (min)	Stomate_1	Stomate_2			Time (min)	Stomate_1	Stomate_2	Stomate_3
	0.1	1.00043	1.00087			0.1	0.995299	0.996708	0.991574
	0.2	0.997737	0.998804			0.2	0.996871	1.00182	0.994143
	0.3	1.00223	1.00499			0.3	0.991368	0.995686	0.994999
	0.4	1.00043	1.00499			0.4	0.996871	0.994664	0.999281
	0.5	1.00313	1.00396			0.5	0.993726	0.996708	1.00356
	0.6	1.00223	1.00396			0.6	0.996871	0.997731	1.00185
	0.7	1.00133	1.00499			0.7	0.991368	0.995686	0.997568
	0.8	0.999533	1.00705			0.8	0.997657	0.994664	1.00185
	0.9	1.00133	1.00087			0.9	0.996085	0.999775	1.00784
	1	1.00133	0.997774			1	0.991368	0.995686	1.00099
	1.1	1.00313	0.99262			1.1	1.0008	0.999775	1.00271
	1.2	1.00223	1.0019			1.2	0.998443	0.999775	1.00271
	1.3	0.997737	0.997774			1.3	0.99923	0.997731	1.00185
	1.4	1.00133	0.995712			1.4	1.0008	1.0008	0.999281
	1.5	1.00043	0.994681			1.5	0.99923	0.999775	1.00185
	1.6	1.00492	0.997774			1.6	0.996085	1.00182	1.00699
	1.7	0.997737	0.997774			1.7	1.00002	1.0008	0.999281
	1.8	1.00133	0.999835			1.8	0.996085	1.00795	1.00527
	1.9	1.00492	1.00293			1.9	0.996085	1.00284	0.996712
	2	1.00492	1.00396			2	0.994512	1.0008	1.00185
	2.1	1.00492	0.999835			2.1	0.996871	1.00386	1.00185
	2.2	0.994145	0.997774			2.2	0.998443	0.995686	0.994999
	2.3	0.996839	0.999835			2.3	1.0008	0.997731	0.998424
	2.4	1.00043	0.994681			2.4	0.996871	0.997731	1.00185
	2.5	0.998635	0.995712			2.5	0.998443	0.990575	0.995856
	2.6	1.00133	0.993651			2.6	0.996085	0.999775	1.00185
	2.7	0.996839	0.999835			2.7	0.998443	1.00182	1.00356
	2.8	1.00223	0.996743			2.8	0.998443	0.997731	1.00099
	2.9	1.00133	1.00293			2.9	0.99923	0.997731	1.00014
	3	1.00223	1.0019			3	0.998443	0.991597	0.996712
	3.1	1.00223	1.0019			3.1	0.998443	0.991597	0.99243
	3.2	1.00223	1.00396			3.2	0.996871	0.995686	1.00014
	3.3	1.00043	1.0019			3.3	1.00395	0.995686	0.999281
	3.4	1.00043	1.00499			3.4	0.99923	0.997731	1.00271
	3.5	0.999533	0.996743			3.5	0.994512	0.991597	0.997568
	3.6	1.00492	1.00087			3.6	1.00159	0.996708	1.00099
	3.7	1.00043	0.998804			3.7	1.00159	0.995686	0.999281
	3.8	0.998635	1.00293			3.8	1.0008	0.997731	0.998424
	3.9	0.999533	1.00087			3.9	0.998443	0.997731	1.00527
	4	0.998635	1.00087			4	1.00159	0.999775	1.00271
	4.1	0.996839	1.00087			4.1	1.00159	1.00182	1.00271
	4.2	0.994145	0.998804			4.2	1.00237	0.997731	0.996712
	4.3	0.996839	1.00396			4.3	1.00788	1.00284	1.00442
	4.4	1.00223	1.00087			4.4	1.00552	0.999775	1.00271
	4.5	0.997737	0.997774			4.5	1.00395	0.997731	1.00442
	4.6	0.997737	1.00087			4.6	1.00065	1.00035	1.00014
	4.7	0.996839	0.998804			4.7	1.00159	0.999775	1.00699
	4.8	0.996839	0.997774			4.8	1.00002	0.993642	0.994999
	4.9	0.995941	0.99262			4.9	1.00002	0.995686	0.992155
	5	0.990552	0.997774			5	0.997657	0.992619	0.997568
	5.1	0.995043	0.998804			5.1	1.00237	0.997731	0.99243
	5.2	0.996839	1.0019			5.2	1.00159	0.996708	0.993287
	5.3	1.00492	1.01014			5.3	1.00237	0.997731	0.996712
	5.4	1.00941	1.01323			5.4	1.00237	0.995686	0.997568
	5.5	1.013	1.01323			5.5	0.997657	0.994664	0.994999
	5.6	1.02288	1.02457			5.6	1.00237	0.997731	0.997568
	5.7	1.02647	1.02767			5.7	1.00159	0.995686	1.00099
	5.8	1.03096	1.0256			5.8	1.00473	0.995686	0.997568
	5.9	1.03815	1.03797			5.9	1.00237	1.00182	1.00014
	6	1.03815	1.03694			6	0.998443	0.995686	0.999281
	6.1	1.04982	1.04313			6.1	1.00237	0.998753	0.998424
	6.2	1.04354	1.03488			6.2	1.00788	0.998753	1.00014
	6.3	1.05252	1.04107			6.3	1.00631	1.0008	1.00099
	6.4	1.05252	1.04416			6.4	1.00473	0.995686	0.996712
	6.5	1.05521	1.04003			6.5	1.00102	0.994664	1.00099
	6.6	1.0588	1.04622			6.6	1.00945	0.996708	0.999281
	6.7	1.05521	1.05343			6.7	1.00159	1.00182	0.998424
	6.8	1.0615	1.0524			6.8	0.996871	0.994664	0.996712
	6.9	1.06689	1.04725			6.9	1.00159	0.994664	1.00099
	7	1.06509	1.04828			7	0.998443	0.993642	0.995856
	7.1	1.06779	1.04519			7.1	0.995299	0.998753	0.997568
	7.2	1.06868	1.04725			7.2	1.00709	0.994664	0.996712
	7.3	1.07048	1.05653			7.3	1.00709	0.997731	1.00014
	7.4	1.06689	1.05343			7.4	1.01102	0.993642	1.00099
	7.5	1.06689	1.05447			7.5	1.00631	0.996708	1.00014
	7.6	1.07138	1.05447			7.6	1.00631	0.994664	0.995856
	7.7	1.07677	1.05653			7.7	1.00709	0.999775	0.997568
	7.8	1.07048	1.05859			7.8	1.00159	0.997731	1.00356
	7.9	1.07048	1.06374			7.9	1.00237	0.994664	1.00356
	8	1.06958	1.05756			8	1.00395	0.995686	0.995856
	8.1	1.06779	1.0555			8.1	1.00945	0.993642	0.993287
	8.2	1.06599	1.05447			8.2	1.00631	0.994664	1.00014
	8.3	1.07138	1.06065			8.3	1.00709	0.996708	0.996712
	8.4	1.07317	1.05756			8.4	1.01338	1.00182	0.998424
	8.5	1.07497	1.05756			8.5	1.00631	1.00182	0.995856
	8.6	1.07766	1.06065			8.6	1.0011	1.0008	1.00527
	8.7	1.07228	1.06168			8.7	1.00126	0.998753	1.00099
	8.8	1.07856	1.06477			8.8	1.00653	1.00182	1.00271
	8.9	1.07048	1.06477			8.9	1.00073	1.0008	1.00099
	9	1.07587	1.06271			9	1.0005	1.00386	0.999281
	9.1	1.07497	1.06065			9.1	1.00866	1.00386	1.00271
	9.2	1.07497	1.0658			9.2	1.00945	0.996708	1.00356
	9.3	1.07497	1.06271			9.3	1.01102	0.995686	1.00099
	9.4	1.07677	1.06374			9.4	1.00102	0.992619	0.997568
	9.5	1.07317	1.06683			9.5	1.00788	0.999775	0.999281
	9.6	1.07766	1.07096			9.6	1.00631	0.999775	0.996712
	9.7	1.07587	1.06993			9.7	1.00134	0.998753	0.999281
	9.8	1.07317	1.06787			9.8	1.00165	0.996708	0.998424
	9.9	1.07497	1.07611			9.9	1.00866	1.0008	0.995856
	10	1.07138	1.06787			10	1.00142	0.999775	0.999281
	10.1	1.07317	1.0689			10.1	1.00126	0.995686	1.00356
	10.2	1.07048	1.06993			10.2	1.00945	0.995686	0.998424
	10.3	1.07407	1.0658			10.3	1.0015	0.996708	0.996712
	10.4	1.07407	1.06065			10.4	1.00134	1.0008	0.999281
	10.5	1.06689	1.06065			10.5	1.00118	0.997731	0.999281
	10.6	1.07766	1.06787			10.6	1.00126	0.996708	0.999281
	10.7	1.06689	1.05859			10.7	1.00142	1.00489	0.995856
	10.8	1.07497	1.0689			10.8	1.0015	1.0008	0.998424
	10.9	1.07138	1.06374			10.9	1.00631	0.999775	0.994999
	11	1.07407	1.07302			11	1.00945	0.998753	0.993287
	11.1	1.07138	1.0689			11.1	1.00709	0.992619	0.994143
	11.2	1.07766	1.0689			11.2	1.0015	0.994664	0.994999
	11.3	1.07946	1.06787			11.3	1.00945	0.994664	0.988149
	11.4	1.07497	1.07096			11.4	1.0015	0.994664	0.991574
	11.5	1.07138	1.06271			11.5	1.00102	0.998753	0.997568
	11.6	1.06868	1.0689			11.6	1.00945	1.0008	0.993287
	11.7	1.07677	1.06683			11.7	1.01967	0.998753	0.994999
	11.8	1.07587	1.06477			11.8	1.00945	0.997731	0.998424
	11.9	1.07138	1.0658			11.9	1.00631	0.998753	0.998424
	12	1.07048	1.06271			12	1.00552	0.998753	0.994143
	12.1	1.06509	1.0658			12.1	1.01259	0.998753	0.996712
	12.2	1.07497	1.06168			12.2	1.01653	0.995686	0.993287
	12.3	1.07407	1.06683			12.3	1.01417	0.994664	0.993287
	12.4	1.07497	1.06065			12.4	1.01102	0.994664	0.998424
	12.5	1.06958	1.0555			12.5	1.01181	0.998753	0.989862
	12.6	1.07228	1.06374			12.6	1.01574	0.999775	0.99243
	12.7	1.07048	1.05653			12.7	1.01574	0.997731	0.993287
	12.8	1.07317	1.05756			12.8	1.01417	0.994664	1.00014
	12.9	1.07587	1.06168			12.9	1.01417	0.997731	1.00356
	13	1.07856	1.0658			13	1.01465	0.994664	0.997568
	13.1	1.07677	1.06374			13.1	1.01574	0.993642	1.00014
	13.2	1.07946	1.06374			13.2	1.01338	0.994664	0.995856
	13.3	1.06599	1.06271			13.3	1.01388	0.998753	0.996712
	13.4	1.06419	1.06477			13.4	1.01338	0.996708	1.00099
	13.5	1.06868	1.0658			13.5	1.01967	0.996708	1.00014
	13.6	1.07048	1.06683			13.6	1.01181	0.996708	1.00185
	13.7	1.06868	1.06787			13.7	1.01102	0.998753	0.998424
	13.8	1.07048	1.0658			13.8	1.00709	0.994664	1.00185
	13.9	1.07138	1.06993			13.9	1.01259	0.999775	1.00356
	14	1.06689	1.06168			14	1.00709	0.995686	0.997568
	14.1	1.07228	1.07508			14.1	1.01181	0.995686	1.00784
	14.2	1.06599	1.06065			14.2	1.01574	0.991597	1.00442
	14.3	1.06958	1.07199			14.3	1.01102	0.996708	1.00099
	14.4	1.07317	1.06787			14.4	1.00709	0.995686	1.00185
	14.5	1.07407	1.07096			14.5	1.01259	0.992619	0.999281
	14.6	1.07228	1.07199			14.6	1.01495	0.997731	0.999281
	14.7	1.07228	1.06787			14.7	1.01338	0.998753	0.991574
	14.8	1.07317	1.06787			14.8	1.01024	1.00182	0.999281
	14.9	1.07946	1.06683			14.9	1.01024	0.98853	1.00527
	15	1.07766	1.07302			15	1.01338	1.00182	0.996712
