# Supplementary material for: FRET kinase sensor development reveals SnRK2/OST1 activation by ABA but not by MeJA and high CO2 during stomatal closure
Source: eLife. 2020 May 28;9:e56351. doi: 10.7554/eLife.56351 (PMC7289597; doi:10.7554/eLife.56351)
Supplement: Figure 4—figure supplement 1—source data 1. [file elife-56351-fig4-figsupp1-data1.xlsx]

## Sheet: Figure 4-figure supplement 1
Figure 4- figure supplement 1A		Normalized ratio									Figure 4- figure supplement 1B		Normalized ratio
	Time (min)	Stomate_1	Stomate_2	Stomate_3	Stomate_4	Stomate_5	Stomate_6	Stomate_7	Stomate_8			Time (min)	Stomate_1	Stomate_2	Stomate_3	Stomate_4	Stomate_5	Stomate_6	Stomate_7	Stomate_8	Stomate_9	Stomate_10	Stomate_11
	0.1	0.998213	0.989527	1.00023	0.990354	1.00089	1.00463	0.996437	1.00019			0.1	0.996758	0.999576	0.99788	1.00144	1.00561	0.99841	1.00853	1.00197	1.00754	1.00099	1.00759
	0.2	1.00329	0.993294	1.00121	0.994947	1.00204	1.00036	0.9946	1.00123			0.2	0.998024	0.994867	0.995499	1.0002	0.992684	0.990836	0.998345	1.00013	1.00079	0.998884	1.0103
	0.3	1.00227	0.997062	1.00219	0.995866	0.998601	1.00357	0.993682	0.998102			0.3	0.994225	0.994867	0.995499	1.00267	0.996562	0.995885	1.00216	1.00197	0.996934	0.993621	1.00578
	0.4	1.00227	0.995806	0.999258	0.99311	1.00089	1.00143	0.992763	0.998102			0.4	0.992958	0.998399	0.995499	0.99896	0.993977	0.988312	0.990704	0.996452	1.00658	1.00099	1.0103
	0.5	1.00126	0.988271	1.00316	0.994028	0.999748	1.00036	0.9946	1.00227			0.5	1.00056	1.00075	0.99788	1.0002	0.997854	0.994623	1.00471	1.00105	1.00561	1.00309	1.01482
	0.6	1.00227	0.998317	1.00219	0.994947	1.00319	0.99716	0.997355	0.996016			0.6	0.996758	0.997221	0.99788	1.0002	1.00044	0.997147	0.994524	0.994613	0.998862	0.998884	1.00669
	0.7	1.00024	0.997062	1.00219	0.997703	1.00089	0.99716	0.9946	1.00227			0.7	0.995491	0.996044	0.99669	1.00144	0.997854	0.99841	0.997071	0.999209	0.997898	0.998884	1.00669
	0.8	1.00024	0.998317	1.00414	0.994947	0.999748	0.999295	0.997355	1.00019			0.8	0.987892	0.993689	0.999071	1.00267	1.00173	0.992099	0.990704	0.995533	1.00175	0.994674	1.00578
	0.9	1.00126	0.997062	0.997307	0.998622	0.995162	0.999295	0.992763	1.00227			0.9	1.00056	1.00429	0.99669	0.99896	1.00044	0.997147	0.993251	0.999209	1.00079	0.994674	0.999458
	1	1.00329	0.998317	0.998283	0.994028	0.996308	0.99716	0.992763	1.00332			1	0.998024	0.997221	0.999071	1.00391	1.00173	0.99841	0.995798	0.996452	0.997898	0.993621	0.995843
	1.1	1.00024	0.997062	0.998283	0.995866	0.999748	0.996093	0.996437	1.00332			1.1	0.998024	0.998399	1.00026	1.00886	0.999147	0.993361	0.997071	0.999209	1.00272	0.994674	1.00669
	1.2	1.00024	0.997062	0.999258	0.999541	0.999748	0.996093	0.998273	1.00436			1.2	1.00056	0.999576	1.00264	1.00639	1.00044	0.994623	0.994524	1.00013	1.00272	0.993621	1.00578
	1.3	1.00024	0.998317	0.996331	0.99311	0.999748	0.99716	0.995518	0.999145			1.3	0.992958	1.00075	1.00026	1.00639	1.00044	0.997147	0.993251	0.997371	0.999826	0.992569	0.996747
	1.4	1.00227	0.995806	0.999258	0.995866	1.00319	0.99716	0.997355	1.00332			1.4	0.996758	1.00075	0.99788	0.99896	1.00432	0.99841	0.994524	0.993694	0.997898	0.989411	0.991325
	1.5	1.00329	0.999573	0.995355	0.995866	0.998601	0.998228	0.999192	1.00123			1.5	1.00562	1.00311	1.00145	1.00267	1.0069	1.00093	0.995798	0.993694	0.995006	0.990464	0.993132
	1.6	1.00024	0.998317	0.999258	0.999541	0.999748	1.00143	1.00103	0.996016			1.6	0.999291	1.00311	0.995499	1.00144	1.00432	0.995885	0.993251	0.999209	1.00272	0.994674	0.998554
	1.7	1.00329	0.999573	0.997307	0.994947	0.996308	1.00036	0.998273	1.00227			1.7	0.999291	1.00193	0.994308	1.00267	1.00432	0.999672	0.993251	0.999209	1.00754	1.00099	0.999458
	1.8	0.996182	0.998317	0.999258	1.00138	0.998601	0.998228	1.00103	1.01479			1.8	1.00562	1.00546	0.99788	1.00515	1.00432	1.0022	0.999618	1.00105	1.00175	1.00204	0.993132
	1.9	0.999228	1.00334	1.00023	1.00322	0.999748	0.995025	1.00103	0.999145			1.9	1.00182	1.00311	0.99669	1.0002	1.00561	1.00093	1.00216	1.00289	1.00079	0.999937	1.00669
	2	1.00024	1.00585	0.998283	0.998622	1.00204	0.995025	1.00011	1.00019			2	1.00056	1.00075	0.999071	1.00267	1.00432	1.0022	0.993251	0.999209	1.00079	0.995727	0.996747
	2.1	0.997197	0.999573	1.00023	1.00138	0.997455	1.00036	1.00195	0.996016			2.1	1.00436	1.00429	0.999071	1.00267	1.0069	1.0022	1.00089	1.00289	1.00272	1.00204	0.999458
	2.2	0.999228	1.00083	1.00023	1.00597	0.999748	1.00036	1.00654	1.00019			2.2	0.996758	1.00311	0.999071	1.00144	0.999147	1.0022	0.997071	0.999209	1.00079	1.00099	0.988614
	2.3	0.996182	1.00083	0.993403	0.998622	1.00204	0.99716	0.996437	1.00019			2.3	0.998024	1.00075	0.999071	0.99896	0.996562	0.997147	1.00089	0.997371	0.99597	0.999937	0.999458
	2.4	0.996182	0.995806	0.994379	1.00138	0.997455	0.999295	1.00103	0.998102			2.4	1.00436	0.998399	0.999071	1.0002	0.997854	1.00093	0.999618	1.00013	1.00175	1.00204	0.98771
	2.5	0.999228	1.00334	0.997307	1.00138	0.995162	1.00463	1.0047	0.998102			2.5	0.999291	0.998399	1.00026	1.00144	0.999147	1.0022	0.999618	1.00656	1.00079	1.00415	1.00307
	2.6	0.999228	0.999573	0.998283	1.00046	1.00089	1.00463	1.00287	0.996016			2.6	0.995491	0.999576	0.99669	0.995247	1.00044	1.00472	1.00089	0.999209	0.994042	0.997832	1.00217
	2.7	0.998213	1.00334	0.997307	0.995866	1.00089	1.00036	1.00011	0.994973			2.7	1.00436	1.00193	1.00264	1.0002	0.995269	1.00472	1.00471	0.999209	0.992113	1.00309	1.00307
	2.8	0.998213	1.0046	1.00219	0.998622	1.00433	1.00357	1.00011	0.998102			2.8	1.00562	1.00546	1.00264	0.99896	0.996562	0.997147	0.999618	1.00564	0.998862	1.00625	1.00036
	2.9	0.997197	1.00208	1.00023	0.997703	1.00089	1.00463	1.0047	1.00019			2.9	1.00689	1.00311	1.00145	0.99896	0.993977	0.999672	1.00089	1.00381	0.998862	1.00415	1.00398
	3	0.999228	1.00711	0.999258	1.00138	0.999748	1.00036	0.999192	0.997059			3	1.00562	1.00664	1.00383	1.00144	0.997854	0.995885	1.00344	1.00013	0.988257	1.00309	1.00127
	3.1	0.994151	1.0046	0.999258	0.995866	0.996308	1.00357	1.00195	0.997059			3.1	0.999291	1.00075	1.00264	1.00267	0.995269	1.0022	1.00344	1.00289	0.995006	1.0073	0.998554
	3.2	1.00329	1.00585	1.00414	1.00046	1.00204	1.0025	1.00103	1.00019			3.2	1.00562	1.00429	0.99788	0.995247	1.00044	1.0022	1.00344	1.00105	0.995006	0.998884	0.998554
	3.3	0.996182	0.999573	1.00414	1.00138	1.00089	0.998228	0.995518	1.00123			3.3	0.996758	1.00311	1.00026	1.0002	0.996562	1.0022	0.999618	1.00197	0.993077	0.998884	1.00036
	3.4	0.996182	0.999573	1.00023	1.00138	0.997455	1.00036	0.999192	1.00019			3.4	1.00942	1.00546	1.00383	1.0002	0.999147	1.00093	0.998345	1.00472	1.00079	1.00625	0.999458
	3.5	0.996182	1.00208	1.00414	1.00597	0.999748	0.999295	0.998273	0.999145			3.5	1.00942	1.00782	1.00026	0.997722	1.00173	1.0022	0.997071	1.00197	0.992113	1.00204	0.994939
	3.6	0.995166	0.997062	1.00414	1.00413	1.00089	0.998228	1.00287	0.996016			3.6	1.00436	1.00311	1.00383	1.00267	1.00173	1.00346	1.00216	1.00197	1.00175	1.00415	0.99765
	3.7	0.999228	1.00083	1.00316	1.00322	0.997455	0.998228	1.00287	0.999145			3.7	1.00182	1.00546	1.00145	0.99896	1.00044	1.00346	1.00089	1.0084	1.00368	1.00204	0.999458
	3.8	1.00126	1.00208	1.00316	1.00597	0.998601	1.00143	1.0047	1.00332			3.8	1.00309	1.00193	0.999071	0.997722	1.00044	1.00598	1.00344	1.00748	1.00272	1.0052	1.00398
	3.9	0.998213	1.00083	0.998283	0.998622	1.00089	1.00357	1.00654	1.00019			3.9	1.00436	0.997221	1.00622	0.99896	1.00044	1.00598	1.00471	0.997371	0.998862	1.00099	1.00036
	4	1.00227	1.00334	1.00511	1.00322	1.00089	0.999295	1.00562	0.999145			4	0.999291	0.994867	1.00026	0.997722	1.00044	1.00725	1.00344	0.997371	0.997898	1.00309	0.992228
	4.1	0.998213	1.00334	1.00219	1.00413	0.997455	1.00143	1.00746	0.999145			4.1	1.00056	0.999576	0.99788	0.991533	0.996562	1.00093	1.00216	1.00289	1.0085	1.00415	0.994036
	4.2	1.00024	1.00208	0.999258	1.00505	1.00204	0.999295	0.998273	0.999145			4.2	1.00182	0.997221	1.00383	1.0002	1.00044	1.00093	0.999618	0.999209	1.00368	1.00625	1.00127
	4.3	1.00227	1.00334	1.00414	1.01332	1.00089	1.00463	1.00654	1.00019			4.3	0.999291	0.996044	1.00145	0.992771	0.999147	1.00093	1.00598	1.00013	1.00272	1.0052	1.00127
	4.4	1.00431	1.0046	1.00511	1.0124	1.00089	1.00143	1.0047	1.00019			4.4	0.995491	0.994867	1.00622	0.997722	1.00302	0.999672	1.00344	0.995533	0.998862	1.00415	0.999458
	4.5	1.00431	1.00083	1.00121	1.00597	1.00089	1.00143	1.00103	1.00332			4.5	0.996758	0.996044	0.999071	0.997722	0.997854	0.999672	1.00344	0.997371	1.00368	1.00099	0.991325
	4.6	1.00227	1.00083	1.00121	1.00781	1.00089	0.995025	1.00378	1.00123			4.6	1.00309	0.996044	1.00741	0.997722	0.997854	0.99841	1.00598	0.997371	1.00368	0.994674	0.998554
	4.7	1.00532	0.999573	1.00121	1.00781	1.00089	1.00143	1.00287	1.00332			4.7	0.998024	0.992512	1.00503	0.997722	0.997854	1.00346	1.00471	0.99829	1.00079	0.995727	0.993132
	4.8	1.00126	1.00208	1.00804	1.01056	1.00548	1.00036	0.998273	0.996016			4.8	0.999291	0.993689	0.99788	0.994009	1.00432	1.00725	1.00726	0.99829	0.999826	1.0052	0.994036
	4.9	1.00227	1.00208	1.00316	1.00689	0.999748	0.998228	1.00287	0.998102			4.9	0.995491	0.997221	1.00383	0.99896	0.999147	1.00346	1.00471	0.999209	0.995006	0.999937	1.00578
	5	0.997197	1.00208	1.00316	1.00781	1.00204	1.00143	1.00287	0.997059			5	0.994225	0.997221	1.00026	0.994009	1.00044	1.00598	1.00598	1.00013	1.00175	0.998884	0.994939
	5.1	0.999228	0.999573	1.00414	1.00873	1.00204	1.00143	1.00011	0.997059			5.1	0.999159	0.990157	0.999071	0.992771	0.999147	1.00346	1.00344	1.00472	1.00079	0.994674	1.00488
	5.2	1.00227	0.997062	0.999258	1.00413	0.999748	0.99716	1.00287	0.99393			5.2	0.995491	0.993689	1.00026	0.99896	0.999147	1.00472	1.00726	1.00381	0.998862	0.998884	1.00307
	5.3	1.00126	0.998317	1.00902	1.01056	0.999748	1.00143	1.00378	0.994973			5.3	0.995491	0.996044	1.00264	0.997722	1.00044	1.00725	1.00598	0.996452	0.997898	0.996779	0.993132
	5.4	1.00329	1.00208	1.00609	1.00689	0.999748	0.996093	0.999192	1.00436			5.4	0.992958	0.993689	1.00026	0.996484	1.00044	1.00851	1.00726	1.00564	0.999826	0.999937	0.994036
	5.5	1.00126	0.997062	1.00414	1.00689	1.00089	0.995025	1.00378	0.997059			5.5	0.998024	0.993689	1.00145	0.996484	1.00044	1.00725	1.00471	0.99829	0.99597	0.995727	1.00036
	5.6	1.00227	1.00334	1.00999	1.01332	1.00089	0.995025	1.00287	0.997059			5.6	0.996758	0.997221	1.00383	0.99896	1.00044	1.00851	1.00471	0.997371	0.996934	0.996779	0.980481
	5.7	1.00431	1.00836	1.00609	1.00781	1.00433	0.998228	0.999192	1.00227			5.7	0.991692	0.991335	1.00383	0.995247	1.00302	1.00851	1.00598	0.99829	1.00561	0.999937	1.00398
	5.8	0.998213	1.00208	1.00999	1.01056	0.999748	0.998228	1.00929	1.00123			5.8	0.996758	0.993689	1.00264	0.996484	1.00302	1.00977	1.00471	1.00381	0.998862	0.999937	1.00036
	5.9	0.999228	1.00208	1.00609	1.00505	1.00433	0.99716	1.01113	1.00332			5.9	0.991692	0.991335	1.00383	0.99896	0.997854	1.0022	1.00853	1.00472	1.00175	0.999937	1.00307
	6	1.00126	1.00334	1.00511	1.00413	1.00089	1.00143	1.00562	1.00227			6	0.996758	0.996044	1.00383	0.99896	1.00173	1.00598	1.00598	0.995533	1.00465	0.995727	0.99765
	6.1	1.00329	1.00585	1.00414	1.00597	1.00433	1.00036	1.00287	1.00332			6.1	0.999291	0.998399	1.00026	0.992771	1.00044	1.00598	1.00598	0.995533	0.999826	0.995727	0.996747
	6.2	1.00329	1.0046	1.00902	1.00413	1.00089	0.999295	1.00011	1.00332			6.2	1.00056	1.00075	1.00145	0.996484	1.00044	1.00472	1.00726	0.993694	0.99597	0.991516	0.986806
	6.3	1.00024	1.00208	1.00609	1.00781	1.00204	0.999295	1.00562	1.0054			6.3	0.998024	0.992512	1.00145	0.990295	1.00173	1.00851	1.00344	1.00105	0.998862	0.997832	0.995843
	6.4	1.00024	1.00334	1.00414	1.00505	1.00319	1.0057	1.00929	1.00436			6.4	0.998024	0.991335	0.99788	0.990295	1.00173	1.00346	1.00471	1.00197	1.00079	0.998884	1.00488
	6.5	1.00024	1.0046	1.00414	1.00322	1.00089	1.00143	1.01297	0.999145			6.5	1.00436	0.997221	1.00145	0.996484	1.00044	1.0022	1.00981	0.996452	1.00272	0.995727	0.993132
	6.6	0.998213	1.0046	1.00707	1.00781	1.00089	1.00463	1.01205	1.00436			6.6	1.00309	0.996044	1.00145	0.994009	1.00302	1.00977	1.00853	1.00197	1.00465	0.998884	1.00307
	6.7	1.00431	1.00962	1.01097	1.01148	1.00204	1.00784	1.0047	1.00645			6.7	1.00562	0.996044	1.00264	0.995247	1.00561	1.00346	1.00598	0.995533	1.00079	0.996779	0.994036
	6.8	1.00126	1.00585	1.01194	1.01148	1.00548	1.0089	1.00378	1.0054			6.8	1.00056	0.998399	1.00145	0.992771	0.996562	1.00598	1.01108	1.00472	1.00947	0.996779	0.995843
	6.9	1.00329	1.00711	1.00219	1.00689	1.00663	1.00677	1.00746	1.00227			6.9	1.00436	0.999576	1.00383	0.994009	1.00044	1.00725	1.00981	1.00381	0.997898	1.00204	0.998554
	7	1.00126	0.998317	1.00023	1.00505	1.00204	1.00677	1.00378	1.00332			7	1.00056	0.994867	1.00026	0.994009	1.00302	1.00346	1.00726	1.00656	1.0085	0.998884	0.994939
	7.1	1.00126	1.0046	1.00609	1.00597	1.00204	1.00997	1.00195	1.00853			7.1	1.00816	0.991335	1.00145	0.991533	1.00173	1.00472	1.00598	1.00289	1.00465	1.00415	0.993132
	7.2	1.00024	1.00083	1.00511	1.00781	1.00548	1.0089	1.00378	1.00749			7.2	1.00816	0.997221	1.00026	0.991533	1.00561	1.00851	1.00598	0.996452	1.00561	0.998884	0.990421
	7.3	1.00329	1.0046	1.01097	1.01424	0.998601	1.0089	1.00195	1.00227			7.3	0.999291	0.997221	1.00264	0.99896	1.00561	1.00725	1.00853	0.999209	1.00368	0.997832	0.992228
	7.4	1.00329	1.00334	1.00609	1.00689	0.998601	1.00784	1.00378	1.0054			7.4	1.00182	0.992512	0.999071	0.995247	1.00173	1.00472	1.01108	1.00197	1.00561	1.00099	0.995843
	7.5	1.00329	1.00585	1.00707	1.00413	0.999748	1.0089	1.00654	1.00436			7.5	1.00816	0.997221	1.00503	0.997722	0.999147	1.00472	1.00853	1.00289	1.00079	0.998884	0.991325
	7.6	1.00329	1.00083	1.00511	1.00413	1.00204	1.01317	1.00654	1.00645			7.6	1.00056	0.993689	1.00264	0.994009	1.00173	1.00725	1.01108	1.00013	1.00465	0.995727	0.999458
	7.7	1.00431	1.00334	1.00609	1.00689	1.00663	1.0057	1.00103	1.0054			7.7	1.01069	0.998399	1.00383	0.99896	1.00044	1.00725	1.00853	1.00013	1.00175	0.995727	0.989517
	7.8	1.00329	1.0046	1.00414	1.00505	1.00319	1.00784	1.00378	1.00332			7.8	1.00816	0.999576	1.00503	0.997722	1.00302	1.00851	1.00598	1.00289	0.999826	0.999937	0.996747
	7.9	0.997197	0.999573	0.999258	1.00138	1.00433	1.00784	0.998273	0.999145			7.9	1.00689	0.996044	1.00264	0.994009	1.00432	1.00725	1.00981	0.99829	0.998862	0.998884	0.994939
	8	1.00532	1.00585	1.00414	1.00505	1.00319	1.0025	1.00378	1.00436			8	1.00436	0.992512	1.0086	0.997722	1.00173	1.00598	1.01108	1.00289	1.00561	1.00204	0.99765
	8.1	1.00227	0.998317	1.00414	1.00322	1.00204	1.00357	1.00103	1.0054			8.1	1.00942	0.994867	1.00383	0.996484	1.00044	1.00472	1.00853	1.00197	0.997898	0.997832	0.990421
	8.2	1.00227	1.00208	1.00316	1.00505	1.00204	1.0025	1.00378	1.0054			8.2	1.00816	0.994867	1.00145	0.994009	1.00173	1.00472	1.00981	1.00197	0.994042	0.996779	0.991325
	8.3	1.00837	1.00711	1.00219	1.00781	1.00548	1.00677	1.00378	1.00645			8.3	1.00689	0.992512	1.00145	0.995247	1.00173	1.00598	1.01363	1.00105	0.998862	1.00204	0.999458
	8.4	1.00634	1.00208	0.999258	1.00781	1.00433	1.0025	1.0047	1.00436			8.4	1.00689	0.993689	1.00383	0.997722	1.0069	1.00977	1.00726	1.00381	0.997898	0.998884	0.994939
	8.5	1.00634	1.00711	1.00219	1.00505	1.00892	0.999295	1.00654	1.00957			8.5	1.00056	0.992512	0.99788	0.991533	1.00302	1.00598	1.00471	1.00105	0.999826	0.997832	0.998554
	8.6	1.00634	1.00711	1.00219	1.00505	1.00663	1.00143	1.00838	1.00332			8.6	1.01576	0.996044	0.99669	0.992771	1.00432	1.00472	1.00471	1.00197	1.00658	0.994674	0.994036
	8.7	1.00634	1.00585	1.00511	1.00873	1.00433	1.0057	1.0047	1.0054			8.7	1.00689	0.996044	0.99788	0.992771	0.999147	1.00851	1.00726	1.00381	1.00561	0.998884	0.994036
	8.8	1.00837	1.01087	1.00609	1.00873	1.00433	1.0057	1.00378	1.00853			8.8	1.01196	0.997221	0.999071	0.99896	1.00432	1.00472	1.01235	1.00472	1.00561	0.999937	0.992228
	8.9	1.00532	1.00334	0.997307	1.00413	1.00204	1.00463	1.0047	1.00749			8.9	1.01069	0.996044	1.00026	0.99896	1.00302	1.00977	1.00598	1.00656	1.00272	0.997832	0.988614
	9	1.00532	1.0046	1.00609	1.00597	0.998601	1.0057	1.00746	1.0054			9	1.00942	0.996044	1.00503	1.0002	1.00561	1.01482	1.00853	1.00289	1.00175	0.990464	0.994036
	9.1	1.00837	1.00585	1.00316	1.00781	1.00433	1.00357	1.00654	1.00227			9.1	1.00689	0.992512	1.00145	0.997722	1.00302	1.00725	1.00598	1.00564	0.994042	0.997832	0.99765
	9.2	1.00227	0.999573	1.00219	1.00873	1.00089	1.0057	1.0047	1.00436			9.2	1.00309	0.993689	1.00026	0.995247	1.00432	1.00725	1.00598	1.0084	1.00658	0.996779	0.994939
	9.3	1.00938	1.00585	0.998283	1.00046	1.00319	1.00357	1.00562	1.00123			9.3	1.00309	0.993689	1.00026	0.997722	1.00302	1.00725	1.00853	1.00748	1.00175	0.996779	0.996747
	9.4	1.00837	1.0046	1.00121	1.00322	1.00319	1.0025	0.996437	1.00123			9.4	1.00056	0.986625	1.00026	0.997722	1.00432	1.00977	1.00853	1.00564	1.00561	0.997832	0.995843
	9.5	1.00634	1.00585	1.00511	1.00781	1.00204	1.00036	0.998273	1.00227			9.5	1.00309	0.98898	1.00026	1.0002	1.00044	1.00977	1.00598	1.00932	1.00465	0.998884	1.00036
	9.6	1.00532	1.00585	1.00219	1.00413	1.00089	1.00677	1.0047	1.00019			9.6	1.00436	0.98898	0.999071	0.997722	1.00302	1.01103	1.00981	1.00105	0.998862	0.991516	0.98771
	9.7	1.00837	1.00711	1.00316	1.00597	1.00204	1.0089	0.999192	1.00123			9.7	0.999291	0.990157	1.00026	0.997722	1.00044	1.0022	1.00598	0.999209	1.00175	0.993621	0.99765
	9.8	1.0104	1.00711	1.00414	1.00689	1.00548	1.01211	1.00103	1.00853			9.8	0.999291	0.990157	1.00026	0.997722	1.00432	1.00598	1.0149	1.00472	1.00368	0.994674	0.998554
	9.9	1.00837	1.00208	1.00414	1.00965	1.00548	1.00784	1.00378	1.0054			9.9	0.999291	0.992512	0.99669	0.996484	1.00173	1.00598	1.00853	1.00564	1.00947	0.999937	0.998554
	10	1.00735	1.00334	1.00609	1.00965	1.00204	1.01104	1.0047	1.00332			10	1.00309	0.992512	1.00503	1.00144	1.00302	1.00977	0.989431	1.00197	1.00754	0.992569	0.99765
	10.1	1.00938	1.0046	1.00414	1.00781	1.00089	1.01211	1.00011	1.00123			10.1	0.992958	0.987803	1.00264	0.997722	1.00173	1.01103	0.986884	1.00564	1.0085	0.997832	0.995843
	10.2	1.00938	1.00334	0.999258	1.0023	1.00204	1.0089	1.00195	1.0054			10.2	1.00182	0.990157	1.00145	0.996484	1.00432	1.01103	0.991978	1.00564	1.00947	0.997832	1.00127
	10.3	1.00837	1.00711	0.999258	1.00597	0.998601	1.01104	1.00103	1.00227			10.3	1.00056	0.987803	0.999071	0.992771	1.00302	1.00851	0.989431	1.00472	1.00465	0.993621	0.993132
	10.4	1.00735	1.00962	1.00414	1.0124	0.997455	1.00997	1.00011	1.00957			10.4	0.999291	0.990157	1.00383	0.997722	1.00302	1.00725	0.991978	1.00289	1.0085	0.991516	0.991325
	10.5	1.00735	1.0046	1.00023	1.00873	0.999748	1.01317	1.0047	1.0054			10.5	1.00182	0.987803	1.00503	0.996484	1.0069	1.01103	0.991978	1.0084	1.00947	0.992569	0.994939
	10.6	1.00532	1.00208	0.999258	1.00873	1.00089	1.01744	1.00929	0.998102			10.6	1.00182	0.990157	1.00145	1.00144	1.00302	1.01482	0.990704	0.996452	1.00561	0.985201	0.992228
	10.7	1.00837	1.0046	1.00316	1.01056	0.999748	1.01638	1.00562	1.00019			10.7	1.00056	0.987803	1.00264	0.996484	1.00302	1.00346	0.991978	1.01024	1.00947	0.997832	0.996747
	10.8	1.00329	1.00711	1.00121	1.01148	0.997455	1.0089	1.0047	0.999145			10.8	1.00309	0.990157	1.00026	0.997722	1.00302	1.00598	0.991978	1.013	1.01236	0.996779	1.00759
	10.9	1.00431	1.0046	0.999258	1.00965	1.00319	1.01104	1.00562	1.00019			10.9	1.00182	0.98898	1.00026	0.995247	1.00432	1.00472	0.993251	1.00748	1.00947	0.997832	0.999458
	11	1.00431	1.00585	1.00219	1.01148	1.00089	1.01211	1.00838	1.0054			11	1.00562	0.98898	1.00026	0.996484	1.0069	1.00851	0.995798	1.00472	1.00465	0.993621	0.986806
	11.1	1.00735	1.00711	1.00316	1.0124	0.999748	1.01317	1.00654	1.00227			11.1	1.00056	0.992512	0.999071	0.996484	1.00819	1.00725	0.993251	0.99829	0.998862	0.987306	0.994939
	11.2	1.00126	1.00083	1.00316	1.01332	1.00089	1.01424	1.00562	1.0054			11.2	1.00562	0.991335	1.00264	0.996484	1.00432	1.00851	0.990704	0.99829	0.997898	0.989411	0.996747
	11.3	1.00634	1.00334	1.00414	1.0124	0.998601	1.00997	1.01021	1.01166			11.3	1.00816	0.994867	1.00741	0.996484	1.0069	1.00725	0.991978	1.00564	1.00658	0.992569	0.998554
	11.4	1.00532	1.00083	1.00219	1.00965	1.00089	1.01211	1.01021	1.00645			11.4	1.00562	0.992512	1.00145	0.997722	1.00173	1.01103	0.993251	1.00013	1.00465	0.988359	0.993132
	11.5	1.00634	1.0046	1.00121	1.01148	1.00089	1.01317	1.0047	1.00227			11.5	1.00309	0.98898	1.00026	0.996484	1.01078	1.01103	0.990704	0.996452	1.00368	0.988359	0.994036
	11.6	1.00735	0.999573	1.00414	1.0124	1.00089	1.01211	1.00929	1.00332			11.6	0.998024	0.987803	1.00264	0.996484	1.00949	1.01103	0.986884	1.00289	1.00754	0.989411	0.990421
	11.7	1.00431	0.998317	1.00219	1.01056	1.00089	1.00997	1.00287	1.0054			11.7	1.00942	0.996044	1.00383	0.996484	1.00561	1.00851	0.990704	0.997371	0.999826	0.988359	0.999458
	11.8	1.01141	1.00585	1.00121	1.00689	1.00089	1.00677	1.01113	1.00436			11.8	1.00309	0.986625	1.00264	1.0002	1.00432	1.00851	0.985611	0.997371	1.00465	0.985201	0.993132
	11.9	1.00837	1.00836	1.00316	1.01056	1.00548	1.01317	1.00838	1.00019			11.9	1.00689	0.992512	0.99788	0.992771	1.0069	1.01356	0.991978	0.990017	1.00079	0.983096	0.996747
	12	1.00634	1.00334	1.00707	1.0124	1.00548	1.01104	1.00103	1.00436			12	1.00182	0.991335	0.99788	0.994009	1.00561	1.00977	0.990704	0.988179	0.999826	0.979938	0.995843
	12.1	1.00532	1.00208	1.00414	1.00689	1.00319	1.00677	1.00746	1.00227			12.1	1.00436	0.994867	0.999071	0.996484	1.0069	1.01356	0.989431	0.994613	1.00368	0.986254	0.999458
	12.2	1.00938	1.00083	1.00609	1.00781	1.00433	1.00784	1.0047	1.00436			12.2	1.00436	0.991335	0.99788	0.994009	1.01207	1.01229	0.993251	0.993694	1.00175	0.983096	0.99765
	12.3	1.00532	1.00334	1.00414	1.00689	1.00319	1.0089	1.00103	1.00749			12.3	1.00689	0.994867	1.00264	1.00144	1.00432	1.00472	0.990704	0.993694	1.00272	0.983096	1.00127
	12.4	1.00735	1.00334	1.00121	1.00965	1.00204	1.00784	0.997355	1.00853			12.4	1.00056	0.991335	1.00383	0.99896	1.00819	1.00977	0.989431	0.992775	1.00175	0.982043	1.00127
	12.5	1.00735	1.00083	1.00219	1.01148	1.00433	1.0089	1.00562	1.0054			12.5	1.00309	0.98898	1.00026	0.997722	1.00561	1.01229	0.989431	0.992775	1.00368	0.980991	0.999458
	12.6	1.00938	0.998317	1.00219	1.01148	1.00548	1.0089	1.00562	1.00227			12.6	0.991692	0.986625	0.999071	0.996484	1.00044	1.00346	0.993251	0.992775	1.00272	0.982043	0.999458
	12.7	1.0104	1.0046	1.00414	1.0124	0.999748	1.00784	1.00654	1.00853			12.7	1.00056	0.993689	0.99669	0.992771	1.00173	1.01103	0.988157	1.00197	1.00272	0.987306	1.00307
	12.8	1.0104	1.00334	0.999258	1.01148	1.00204	1.0089	1.00195	1.00853			12.8	0.994225	0.986625	0.999071	0.995247	1.00173	1.00851	0.990704	0.994613	1.00272	0.980991	0.999458
	12.9	1.01243	1.00711	1.00219	1.01148	1.00548	1.00784	1.00378	1.00749			12.9	1.00309	0.991335	1.00026	0.997722	1.00432	1.01608	0.993251	0.99829	0.996934	0.978886	0.998554
	13	1.00938	1.0046	1.00609	1.01608	1.00433	1.00784	1.0047	1.00019			13	1.00436	0.993689	1.00264	1.00267	1.00044	1.00472	0.989431	0.990017	0.997898	0.980991	0.99765
	13.1	1.00735	1.0046	1.00219	1.0124	1.00663	1.00997	1.00929	1.00227			13.1	1.00309	0.992512	0.999071	0.99896	1.00302	1.00725	0.989431	0.992775	1.00175	0.986254	1.00578
	13.2	1.00837	1.0046	1.00316	1.01424	1.00319	1.0057	1.00654	1.00227			13.2	0.999291	0.990157	1.00383	0.99896	1.00173	1.00851	0.989431	0.990936	0.996934	0.982043	0.992228
	13.3	1.00837	1.00334	1.00023	1.0124	1.00663	1.00784	1.0047	1.00853			13.3	0.995491	0.992512	0.999071	0.99896	1.00044	1.00977	0.989431	0.992775	0.99597	0.980991	1.00036
	13.4	1.00837	1.00585	1.00023	1.00965	1.00777	1.00357	1.00838	1.00645			13.4	1.00182	0.986625	1.00026	0.995247	1.00432	1.00977	0.989431	0.992775	1.00175	0.987306	1.00127
	13.5	1.00837	1.00334	1.00023	1.0124	1.00089	1.0089	1.00654	1.00436			13.5	1.00436	0.990157	1.00383	1.00144	1.00173	1.01356	0.990704	0.993694	0.997898	0.985201	0.989517
	13.6	1.01141	1.00208	1.00414	1.01608	1.00548	1.00677	1.00287	1.00749			13.6	0.998024	0.986625	0.999071	1.0002	1.00173	1.01356	0.991978	0.995533	0.99597	0.983096	1.00488
	13.7	1.01141	1.00334	1.00316	1.01516	1.00319	1.0057	1.00195	1.00645			13.7	1.00309	0.986625	1.00026	0.997722	1.00173	1.01103	0.991978	0.98634	0.992113	0.982043	0.998554
	13.8	1.01243	1.00585	1.00707	1.01883	1.00204	1.0057	1.00378	1.00749			13.8	0.996758	0.985448	1.00026	1.00267	1.00302	1.00472	0.991978	0.989098	0.993077	0.983096	0.996747
	13.9	1.00837	1.00334	1.00511	1.01608	0.997455	1.00036	1.0047	1.00749			13.9	1.00942	0.992512	0.999071	1.00144	1.00173	1.00977	0.990704	0.990017	0.992113	0.979938	0.994939
	14	1.0104	1.0046	1.00707	1.01424	0.996308	1.0025	1.0047	1.00853			14	1.00562	0.987803	1.00145	0.99896	1.00173	1.01103	0.991978	0.996452	0.999826	0.984148	0.994036
	14.1	1.0104	1.00083	1.00902	1.01791	1.00089	1.00357	1.00011	1.00436			14.1	1.00056	0.98898	0.999071	1.0002	1.00173	1.01356	0.988157	0.98634	0.991149	0.979938	0.994939
	14.2	1.01243	1.00334	1.00707	1.01424	1.00089	0.99716	1.00654	1.0054			14.2	0.999291	0.987803	1.00383	1.00639	1.0069	1.01482	0.986884	0.997371	0.995006	0.985201	0.996747
	14.3	1.01141	1.00083	1.00804	1.01883	0.999748	1.00143	1.00287	1.00123			14.3	0.998024	0.98898	1.00026	0.99896	1.00561	1.00598	0.988157	0.996452	0.995006	0.985201	0.995843
	14.4	1.0104	1.00711	1.00999	1.017	1.00089	1.00143	1.00378	1.00332			14.4	1.00309	0.987803	0.999071	0.99896	1.0069	1.00977	0.988157	0.993694	0.995006	0.982043	1.00036
	14.5	1.01141	1.00083	1.00707	1.01608	1.00089	1.00463	1.00378	1.00645			14.5	1.00436	0.991335	1.00026	1.0002	1.00561	1.00472	0.986884	0.991856	0.996934	0.985201	1.00036
	14.6	1.0104	1.00334	1.00707	1.01424	0.996308	1.00463	1.00378	1.00853			14.6	1.00182	0.985448	1.00026	1.0002	1.00044	1.00977	0.986884	0.992775	0.998862	0.985201	0.990421
	14.7	1.01548	1.00083	1.00804	1.01975	0.998601	1.00463	1.00746	1.00436			14.7	1.00816	0.98898	1.00264	1.00144	1.00561	1.01103	0.989431	0.992775	0.993077	0.988359	0.996747
	14.8	1.01446	1.00711	1.00414	1.0124	1.00204	1.00677	1.0047	1.00332			14.8	1.00689	0.98898	1.00383	1.00391	1.0069	1.00977	0.989431	0.989098	0.994042	0.985201	0.989517
	14.9	1.01141	1.01087	1.00121	1.01424	0.996308	1.00784	1.00103	1.00332			14.9	1.00689	0.991335	1.00503	1.00391	1.00819	1.00851	0.984337	0.996452	0.996934	0.989411	1.00217
	15	1.01141	1.00208	1.00121	1.01791	1.00319	1.00357	0.998273	1.00332			15	1.00436	0.98898	1.00026	1.00144	1.00432	1.00851	0.989431	0.987259	0.995006	0.982043	0.994939
