# Supplementary material for: FRET kinase sensor development reveals SnRK2/OST1 activation by ABA but not by MeJA and high CO2 during stomatal closure
Source: eLife. 2020 May 28;9:e56351. doi: 10.7554/eLife.56351 (PMC7289597; doi:10.7554/eLife.56351)
Supplement: Figure 4—figure supplement 2—source data 1. [file elife-56351-fig4-figsupp2-data1.xlsx]

## Sheet: Figure 4-figure supplement 2
Figure 4- figure supplement 2A		Normalized ratio																										Figure 4- figure supplement 2B		Normalized ratio																			Figure 4- figure supplement 2C
	Time (min)	average	Stomate_1	Stomate_2	Stomate_3	Stomate_4	Stomate_5	Stomate_6	Stomate_7	Stomate_8	Stomate_9	Somate_10	Stomate_11	Stomate_12	Stomate_13	Stomate_14	Stomate_15	Stomate_16	Stomate_17	Stomate_18	Stomate_19	Stomate_20	Stomate_21	Stomate_22	Stomate_23	Stomate_24			Time (min)	average	Stomate_1	Stomate_2	Stomate_3	Stomate_4	Stomate_5	Stomate_6	Stomate_7	Stomate_8	Stomate_9	Stomate_10	Stomate_11	Stomate_12	Stomate_13	Stomate_14	Stomate_15	Stomate_16	Stomate_17
	0.1	0.999199	1.00382	1.00357	0.987389	0.994116	1.00094	1.00204	0.997763	1.00256	0.999644	0.999034	1.00291	1.00477	1.00447	1.00258	1.00045	0.999913	1.00135	0.995685	0.994903	1.00143	0.998786	0.986966	0.996484	0.999215			0.1	0.998321	1.01406	1.00204	1.00479	0.999433	1.00033	0.988723	0.994645	0.994688	0.993654	0.996229	0.99639	0.988622	1.00108	0.991681	1.00642	0.997636	1.00104
	0.2	1.00035	0.998768	1.00124	0.989605	0.992773	1.00455	1.00516	1.00325	1.00163	1.00409	1.00109	1.00372	1.00379	1.00169	0.997536	0.998653	1.00208	1.00339	0.998921	0.997027	1.00369	1.00063	0.984148	1.00954	1.00144			0.2	0.997761	1.01406	1.00886	1.00479	0.998383	0.99052	0.988723	0.993352	0.993386	0.992556	0.999737	0.99639	0.989469	1.00388	0.990587	1.00281	0.997636	0.996801
	0.3	1.00099	0.995738	1.00707	0.988497	0.991429	0.998531	1.001	1.00215	1.0063	1.01076	1.00623	1.00452	1.00673	1.00169	0.999556	1.00135	1.001	1.00237	1	0.995965	1.00482	1.00155	0.986966	1.00151	1.0081			0.3	0.998941	1.01282	1.00545	1.00143	0.995234	0.995968	0.990737	0.999819	0.999896	0.993654	0.999737	0.99733	0.9971	1.00108	0.990587	1.00461	0.998673	0.99786
	0.4	0.999658	0.994728	1.00707	0.991822	0.992773	1.00094	1.001	0.993377	1.00349	0.999644	0.99595	1.00372	1.00379	1.01188	1.00258	0.996857	0.999913	1.00339	1	0.997027	1.00143	0.997866	0.987905	0.999498	1.00514			0.4	0.998108	1.00786	1.00432	0.998075	0.999433	0.998148	0.991744	1.00241	0.98948	0.988164	0.997106	0.99733	0.9971	0.99735	0.992776	1.01002	0.998673	0.99786
	0.5	1.00134	0.996748	1.00474	0.994038	0.994116	1.00576	1.00516	1.00215	1.00069	1.00298	1.00212	1.00452	1.00379	1.00725	1.00158	1.00225	0.999913	1.00339	1.00216	0.994903	1.00143	1.00338	0.991661	1.00151	1.00588			0.5	1.00023	1.01282	1.00204	0.999194	1.00048	0.997058	0.993758	0.997232	0.999896	0.999144	1.005	0.99827	1.00134	0.999216	0.992776	1.00912	0.99971	0.996801
	0.6	1.00066	0.996748	1.01057	0.990713	0.994116	1.00094	1.001	0.999956	1.00536	1.00076	1.00315	1.00211	1.00477	1.00261	0.999556	1.00045	0.996663	1.00237	1.00108	0.999151	1.00256	1.0043	0.991661	1.00452	1.0007			0.6	0.998933	1.01034	1.00318	0.996957	0.996284	0.994878	0.996778	1.00111	1.0012	0.991458	1.00149	0.99921	0.998796	0.998283	0.990587	1.00371	0.998673	0.99892
	0.7	1.00087	0.992709	1.00474	0.990713	0.992773	1.00094	1.00308	0.999956	1.00349	1.00076	1.00315	1.00613	1.00967	1.00354	0.998546	1.00045	0.993413	1.00643	1.00324	0.994903	1.00029	1.00522	0.993539	1.00954	1.00366			0.7	0.998337	1.01282	1.00091	0.995838	0.995234	0.993789	0.985703	0.997232	0.999896	0.994752	0.99886	1.00203	0.995405	0.999216	0.992776	1.00551	1.00178	0.999979
	0.8	1.00169	0.997758	1.00824	0.988497	0.995459	1.00214	1.001	1.00215	1.00349	1.00076	0.998006	1.00211	1.00379	0.99798	0.999556	1.00494	1.00316	1.01151	1.01187	0.99278	0.999163	1.00706	0.996356	1.00753	1.00514			0.8	1.00087	1.01158	0.999773	0.996957	0.996284	0.999237	0.991744	1.0037	1.0025	0.996948	1.005	0.99921	1.00134	0.998283	0.994965	1.00822	1.00697	1.0021
	0.9	1.00133	0.999778	1.00474	0.991822	0.996803	0.999735	1.00204	0.999956	1.0063	1.00076	1.00212	1.0005	1.00281	1.00447	1.00258	1.00045	0.99883	1.00237	1.00216	0.999151	1.00369	1.00155	0.998235	1.00753	1.00366			0.9	0.999025	1.01282	1.00545	0.998075	0.993134	1.00033	0.993758	0.995939	0.998594	0.99585	0.996229	0.99827	0.994557	0.99735	0.99387	1.00642	1.00386	0.99892
	1	1.00056	0.999778	1.00357	0.99293	0.995459	1.00094	0.998918	1.00105	1.00069	0.999644	1.00006	0.999694	1.00281	1.00354	1.0046	1.00135	0.99883	1.00542	1.00216	0.994903	1.00029	1.00522	0.994478	1.0005	1.00662			1	0.997717	1.01034	1.00091	0.995838	0.991035	0.994878	0.987716	1.0037	0.999896	0.991458	0.996229	0.99827	1.00304	0.998283	0.991681	0.998306	1.00282	0.996801
	1.1	1.00196	0.993719	1.00707	0.999579	1.00083	1.00214	1.00308	1.00653	1.00069	0.999644	0.99595	1.00372	1.00575	1.00354	1.00359	1.00045	1.001	1.00237	1.00324	0.998089	1.00256	1.00155	0.998235	1.00854	1.00514			1.1	0.999345	1.00414	1.00432	0.996957	0.995234	0.997058	0.987716	1.00241	0.998594	1.00024	1.00061	0.99733	0.996252	1.00015	0.992776	1.00912	1.00386	1.0021
	1.2	1.00128	0.998768	1.00357	0.995146	0.99949	1.00455	1.0062	1.01092	0.994151	0.995196	0.991839	1.00372	1.00183	1.00261	0.999556	1.00494	1.00316	1.0044	1.00216	0.998089	0.999163	1.00338	0.999174	1.00352	1.00514			1.2	0.999907	1.00786	1.00091	0.996957	0.993134	1.00033	0.992751	1.00241	0.990782	0.996948	1.00237	0.99827	1.00049	1.00295	1.00153	1.01002	1.00075	0.999979
	1.3	1.00054	0.999778	1.00474	0.994038	0.998146	0.999735	1.001	1.00325	0.994151	1.00743	1.00212	1.00291	1.00281	1.00076	0.998546	1.00314	0.99558	1.00339	1	1.00127	0.9969	1.00155	1.00105	0.998493	1.00218			1.3	0.997801	1.00414	1.00432	0.992481	0.989985	0.994878	0.982682	1.00241	0.997292	1.00024	0.997106	0.99639	0.993709	1.00295	0.99606	1.00732	1.00386	0.996801
	1.4	1.00143	0.996748	1.00124	0.994038	0.998146	1.00455	1.00828	1.00873	0.997888	1.00298	1.00315	0.99889	1.00281	0.998907	0.994507	0.999551	1.00533	1.0044	1.00324	1.00021	0.995768	1.0043	1.00011	1.00753	1.00292			1.4	1.00109	1.0029	1.00091	0.999194	0.999433	0.998148	0.999799	1.00758	1.0025	1.00463	1.00061	0.99827	0.999644	1.00108	1.00263	1.00461	0.994524	1.0021
	1.5	1.00021	0.997758	1.00474	0.998471	0.996803	1.00214	1.001	1.00105	0.999757	1.00187	0.996978	1.00211	1.00084	1.00169	1.00158	1.00135	1.001	1.0044	0.997842	0.999151	0.995768	1.00155	0.999174	1.00251	0.995515			1.5	1.00063	1.01034	0.999773	1.00031	1.00048	0.997058	0.993758	0.995939	0.998594	1.00024	0.99886	0.99733	1.00219	1.00388	1.00372	1.00642	1.00075	1.00104
	1.6	1.00072	1.00079	0.997736	0.999579	1.00621	0.997326	0.996837	1.00434	0.998823	1.00076	1.00212	0.99889	1.00183	0.998907	1.00158	1.00314	1.00533	1.00034	1	1.0034	0.9969	0.999706	1.00387	1.0005	0.998475			1.6	1.00035	1.0029	1.00432	0.998075	0.994184	0.998148	0.998792	1.00241	0.999896	1.00134	0.994475	0.99733	1.00304	1.00015	1.00153	1.00551	1.00178	1.0021
	1.7	0.999968	0.998768	1.00007	0.995146	0.998146	1.00576	1.00204	1.00873	0.998823	1.0052	0.999034	0.997282	0.993975	0.994273	0.997536	1.00314	1.00533	1.00643	1.00216	0.995965	0.994636	1.00338	0.995417	0.999498	0.998475			1.7	0.99977	1.00538	1.00091	1.00703	1.00468	0.997058	0.993758	0.992058	1.0012	1.00024	0.994475	1.00109	0.998796	1.00015	0.998249	0.999207	0.99971	1.0021
	1.8	0.999904	0.998768	1.00124	0.994038	0.995459	1.00094	0.998918	1.00215	0.997888	0.998532	1.00212	0.999694	0.9979	0.997053	1.00057	0.999551	1.00425	1.00745	1.00324	1.00021	0.993505	0.999706	1.00105	1.00352	0.999956			1.8	1.00163	1.0091	1.00659	1.00143	1.00363	0.999237	0.995771	1.0037	1.00641	1.00463	0.995352	0.99921	0.993709	1.00108	0.999343	0.998306	1.00282	1.00739
	1.9	0.999111	0.996748	1.0024	0.999579	1.00352	0.994917	0.995796	0.996667	0.995085	1.00076	0.999034	0.99889	1.00183	0.993347	0.996527	1.00045	1.00316	1.00339	0.995685	0.999151	0.9969	1.00246	0.996356	1.00753	0.998475			1.9	1.00255	1.00414	1.00659	1.00367	1.00048	1.00033	0.997785	1.00111	1.0051	1.00244	1.00061	1.00297	1.00727	1.00202	1.00153	0.999207	1.00178	1.00633
	2	0.999684	1.00281	1.00474	0.999579	1.00083	0.993713	0.999958	1.00325	0.997888	0.99742	1.00109	0.998086	0.999863	0.996127	0.999556	1.00225	1.00208	1.00135	0.996764	1.00021	0.994636	0.997866	0.996356	1.00753	0.998475			2	1.00003	1.00414	1.00091	1.00255	1.00363	0.997058	1.00081	0.997232	0.992084	1.00354	0.992721	0.99827	0.998796	1.00202	1.00153	0.999207	0.99971	1.00633
	2.1	1.00082	0.992709	1.00357	0.997363	0.99949	0.999735	1.001	1.00982	0.999757	1.00409	1.00315	0.998086	0.999863	0.999833	1.00359	1.00045	0.99883	1.00237	1.00108	1.00234	0.999163	1.00063	0.998235	1.00452	0.999956			2.1	1.00035	1.00042	0.999773	1.00367	0.999433	0.998148	0.994764	1.0037	0.999896	1.00244	0.993598	0.99921	1.00388	1.00108	1.00263	0.998306	1.00178	1.00316
	2.2	1.0014	1.0018	1.00707	0.999579	1.00083	0.996122	1.00204	1.00653	0.999757	1.00298	1.00109	1.0013	1.00673	0.99798	1.0046	1.00674	1.00316	1.00237	0.995685	0.995965	1.00143	0.998786	0.996356	1.00251	1.00218			2.2	1.00029	0.997942	0.998637	0.999194	0.998383	0.994878	0.993758	1.00499	0.99599	1.00024	1.00061	1.00203	0.998796	1.00668	1.00591	1.00191	1.00282	1.0021
	2.3	0.99941	0.998768	1.0024	0.999579	0.998146	0.999735	1.00308	1.00763	0.997888	0.990749	0.993895	0.999694	0.999863	0.996127	1.00258	1.00045	0.999913	1.00135	0.998921	1.00021	0.9969	0.995107	0.996356	1.00653	0.999956			2.3	1.00017	0.997942	1.00886	0.995838	1.00153	0.998148	1.00685	0.998525	0.998594	1.00134	0.997106	1.00015	1.00304	1.00295	1.00153	0.9929	0.997636	0.999979
	2.4	1.00065	0.997758	1.00124	0.99293	0.995459	0.999735	1.00308	1.00653	1.00443	1.00298	1.00417	1.00291	1.00183	0.998907	1.00258	1.00584	1.00208	0.999324	0.998921	0.998089	1.00256	0.998786	0.999174	1.00151	0.994774			2.4	0.999621	0.996702	1.00091	0.998075	0.999433	1.0036	1.00181	0.999819	0.998594	0.99585	0.999737	1.00109	0.998796	1.00668	1.00044	0.996504	0.996599	0.99892
	2.5	1.00022	0.998768	1.00007	0.999579	0.99949	0.996122	0.999958	1.00763	1.00256	0.998532	0.996978	1.00211	1.00183	0.996127	1.00359	1.00225	0.994497	1.00135	1.00108	0.998089	1.00029	0.998786	1.00199	1.00653	0.996995			2.5	0.999666	1.00166	1.00204	0.998075	0.997333	0.995968	1.00282	0.992058	0.993386	0.994752	1.00149	1.00203	1.00388	1.00761	1.00482	0.995603	0.997636	1.00316
	2.6	1.00107	0.998768	1.00124	1.00401	1.00083	0.999735	0.999958	1.01092	1.00256	1.00187	1.00417	1.00693	1.00379	0.998907	0.999556	0.995061	1.001	1.00237	1	0.999151	0.999163	1.0043	0.996356	0.996484	0.998475			2.6	0.99869	0.995463	1.00091	0.998075	0.994184	0.999237	1.00383	0.995939	0.998594	0.994752	1.005	1.00203	1.00643	0.999216	1.00044	0.990197	0.994524	0.99892
	2.7	0.999582	1.00281	1.00357	1.00069	1.00083	1.00335	0.999958	0.996667	0.997888	0.995196	0.996978	1.00291	0.996919	0.997053	1.0046	0.999551	0.997747	0.999324	0.998921	0.99278	1.00369	0.998786	0.998235	1.00452	0.996995			2.7	1.00004	0.999182	0.990684	1.00143	0.999433	1.00578	1.00584	0.995939	0.998594	0.998046	1.00149	1.00203	1.00304	1.00761	1.00482	0.996504	0.991413	0.99892
	2.8	1.00111	0.999778	1.00124	1.00401	1.00352	1.00094	0.998918	0.99886	1.01003	1.00298	1.00623	0.998086	0.998881	0.99798	1.00158	0.996857	1.001	1.00237	1.00324	0.999151	0.998031	1.00155	0.998235	1.00251	1.0007			2.8	0.999547	0.994223	0.997501	0.998075	0.992084	1.00578	1.01188	1.00111	0.998594	0.999144	0.996229	1.00015	1.00304	1.00575	1.00153	0.993801	0.995561	0.99786
	2.9	1.00066	1.0018	0.997736	1.00069	1.00083	1.00214	0.998918	0.994474	1.00443	1.00298	1.00315	1.00372	0.999863	0.994273	0.998546	0.997755	1.00316	0.998308	1.00108	1.00021	1.00143	1.00063	1.00293	1.00753	0.999215			2.9	0.999808	0.990504	0.994092	1.00143	1.00258	1.00578	1.00081	0.998525	1.0025	1.00134	0.996229	1.00109	0.997948	1.00668	1.00701	0.994702	0.996599	0.99892
	3	1.00014	1.0018	0.997736	0.999579	1.00218	1.00094	1.00308	0.999956	1.00723	0.999644	1.00315	1.00211	0.994957	0.997053	1.00057	0.997755	1.001	0.999324	1.00108	1.00127	1.00143	0.996947	1.00293	0.992466	0.999215			3	0.99897	0.996702	0.995228	1.00031	0.996284	1.0036	0.997785	0.994645	1.0038	1.00024	1.005	1.00579	1.00049	0.996417	1.00044	0.990197	0.994524	1.00104
	3.1	0.999337	0.999778	1.00124	0.999579	0.998146	1.00214	0.999958	0.994474	1.00443	0.998532	0.99595	1.00211	0.995938	0.999833	0.997536	1.00135	0.996663	0.998308	0.993528	1.00021	1.00256	0.996027	1.00481	1.00251	0.998475			3.1	0.999799	0.996702	0.995228	0.994719	0.995234	1.00251	1.00181	1.00241	0.998594	1.00024	1.00675	1.00767	1.00473	1.00015	1.00482	0.994702	0.99245	0.99786
	3.2	0.999626	1.00483	1.00124	1.0018	1.00083	0.998531	0.997877	0.992281	1.00443	0.998532	0.998006	1.00211	0.995938	1.00076	1.00057	0.997755	0.996663	0.998308	1.00108	1.0034	1.00143	0.997866	1.00011	0.997489	0.999215			3.2	0.999109	0.992983	0.992956	0.996957	1.00153	1.00251	0.999799	1.01017	1.0012	1.00134	0.999737	1.00015	0.997948	0.994551	1.00263	0.993801	0.995561	1.00104
	3.3	1.00014	1.00079	0.997736	1.0018	1.00083	0.999735	0.998918	0.997763	1.00443	0.995196	1.00212	0.997282	0.995938	0.998907	0.997536	0.999551	1.00533	1.00034	1.00108	0.999151	1.00595	0.997866	1.00481	0.999498	1.0007			3.3	1.00141	0.994223	0.996364	1.00255	1.00363	1.00795	1.00483	1.00758	1.0051	1.00134	0.997106	1.00673	0.999644	1.00015	1.00263	0.996504	0.995561	1.0021
	3.4	1.00008	1.00079	0.998903	1.0029	1.00486	0.998531	0.999958	0.99886	1.00256	0.999644	1.00006	1.0005	0.994957	0.999833	1.00158	0.999551	0.994497	1.00034	1	1.00021	0.999163	1.00063	1.00575	0.996484	1.00144			3.4	0.999905	0.995463	0.994092	1.00479	1.00468	0.991609	0.996778	1.0037	0.998594	1.00024	1.00412	1.00391	0.998796	1.00015	1.00153	0.999207	1.00075	0.999979
	3.5	0.99916	1.00281	0.996569	1.0018	0.996803	0.998531	0.997877	0.991185	1.00349	1.00187	1.00417	0.999694	0.996919	0.998907	1.00057	0.996857	0.99558	0.997292	0.997842	1.00021	0.999163	0.998786	1.00575	0.996484	1.0007			3.5	1.00092	0.994223	0.994092	1.00591	1.00783	1.00578	1.00483	1.00111	1.0012	0.996948	1.00061	1.00391	1.00304	0.999216	1.00153	0.995603	0.996599	1.00316
	3.6	0.999242	0.997758	1.00124	1.00623	1.00486	0.996122	0.996837	0.99557	1.00349	0.994084	0.999034	0.998086	0.993975	0.998907	0.999556	1.00045	0.997747	0.996277	1	1.0034	0.999163	0.999706	1.00669	0.990457	1.00218			3.6	0.999363	0.992983	0.998637	1.00255	1.00468	1.0036	0.999799	0.997232	0.999896	1.00024	0.997106	1.00203	0.999644	0.994551	1.00153	0.9929	1.00075	1.00104
	3.7	0.999939	0.999778	0.996569	1.00844	1.00621	1.00094	0.999958	0.993377	0.997888	0.995196	1.00109	0.998086	0.998881	0.997053	0.997536	1.00135	0.99883	0.998308	0.996764	1.0034	1.00256	0.999706	1.00669	0.998493	1.00144			3.7	0.999607	0.990504	0.987276	1.00367	1.00258	1.00251	1.00483	0.999819	0.999896	1.00024	1.00061	1.00391	0.998796	1.00108	1.00153	0.997405	0.998673	0.999979
	3.8	0.999336	1.00584	0.988401	1.01066	1.00621	0.998531	0.998918	0.996667	0.995085	1.00076	0.999034	0.997282	0.9979	0.998907	1.00057	1.00045	0.996663	0.999324	0.996764	1.0034	0.998031	1.00063	1.00387	0.992466	0.997735			3.8	1.0006	0.991744	0.996364	1.00255	1.00573	1.00251	1.00383	1.00111	1.0038	1.00024	1.00412	1.00391	1.00304	0.998283	0.999343	0.999207	0.998673	0.995742
	3.9	0.999739	1.00483	0.995402	1.00844	1.00352	0.997326	0.994756	0.996667	0.997888	0.992972	0.999034	1.0005	0.999863	1.00169	0.998546	1.00225	0.999913	0.994246	0.996764	1.0034	0.999163	1.00063	1.00856	0.994475	1.00292			3.9	0.999717	0.996702	1.00318	1.00143	1.01098	1.00795	1.00483	0.993352	0.99599	1.00024	0.995352	0.99733	1.00134	0.996417	0.999343	0.997405	0.99971	0.993623
	4	0.999798	1.00382	0.989568	1.00955	1.00621	1.00214	1.001	0.993377	0.998823	1.00632	1.00315	0.995673	0.995938	0.996127	0.995517	0.997755	0.99883	0.998308	0.998921	1.00552	1.00029	0.997866	1.00575	0.99548	0.999215			4	0.999735	0.991744	1.00886	1.00031	1.00573	1.00033	1.00584	1.00111	1.0012	1.00354	0.99886	0.99545	0.996252	0.996417	1.00044	0.9929	0.99971	0.996801
	4.1	0.998575	1.00685	0.986067	1.00288	1.00486	1.00094	0.995796	0.996667	0.997921	0.996293	0.996422	0.997282	0.996919	1.00076	0.997536	1.00045	0.999913	0.997292	0.997842	1.00552	0.999163	0.999706	1.00481	0.985434	0.998475			4.1	1.00011	0.992983	1.00204	1.00255	1.00258	1.00142	1.00383	0.994645	1.00771	1.00354	0.994475	0.99451	1.00558	0.994551	1.00153	0.999207	1.00178	0.99892
	4.2	0.998469	1.0018	0.990734	1.00844	1.00218	0.999735	0.994756	0.996667	0.993217	1.00187	0.999034	0.994065	0.998881	0.999833	0.999556	0.995959	0.997747	0.998308	1.00216	1.00127	0.998031	0.996947	1.00387	0.990457	0.997735			4.2	1.00088	0.989264	1.00204	1.00143	1.00363	1.00033	1.01289	0.997232	1.01031	1.00354	1.00237	0.99639	0.996252	0.99735	1.00482	0.997405	0.997636	1.0021
	4.3	0.999656	1.00685	0.991901	1.00844	1.00218	0.999735	1.001	0.99557	1.00163	1.00632	1.0052	0.997282	0.998881	0.999833	0.998546	0.999551	0.99883	0.990183	0.998921	1.0034	0.995768	0.997866	0.999174	0.99548	0.999215			4.3	1.00027	0.991744	0.998637	1.00591	1.00573	1.00142	1.00886	0.986885	0.999896	1.00024	1.00324	0.99827	1.00134	1.00015	1.00263	1.00101	1.00075	0.99786
	4.4	0.998527	1.00382	0.990734	1.00069	0.99949	1.00094	1.001	0.99886	0.995085	1.00076	0.99595	0.99326	0.996919	0.99798	0.996527	0.996857	1.00208	0.991199	1.00216	1.00552	0.998031	1.00155	1.00199	0.998493	0.994774			4.4	1.00322	0.991744	1.00091	1.00703	1.00258	1.00033	1.00785	0.999819	1.00641	1.00903	1.01201	1.00673	1.00643	0.99735	1.00372	1.00011	1.00697	0.995742
	4.5	0.997859	0.997758	0.989568	1.00844	1.00352	0.998531	0.994756	0.997763	0.998823	0.992972	0.992867	0.996477	0.999863	0.997053	0.996527	0.995061	0.993413	0.994246	0.998921	1.00446	1.00143	1.00063	1.00481	0.994475	0.996255			4.5	1.00207	0.994223	0.998637	1.00143	0.998383	1.0036	1.01389	0.994645	1.0025	1.00793	1.01026	1.00485	1.00558	0.998283	1.00372	0.996504	1.00178	0.99892
	4.6	0.998705	0.997758	0.987234	1.01066	1.00352	0.997326	0.999958	0.991185	0.998823	0.99742	0.996978	0.998086	0.9979	1.00076	0.998546	0.995061	1.001	0.995261	1.00108	1.0034	1.00143	1.00155	1.00105	0.994475	0.998475			4.6	1.00162	0.990504	0.997501	1.00255	0.997333	1.00033	1.00785	1.00887	1.00901	1.01122	1.00061	0.99827	0.996252	0.994551	1.00482	1.00191	1.00489	1.00104
	4.7	0.998895	1.00685	0.987234	1.00623	1.00755	0.994917	0.994756	0.997763	0.999757	1.00298	1.00212	0.990848	0.992994	1.00447	1.00057	0.997755	0.99883	0.992215	1	1.00446	1.00143	0.998786	1.00199	0.993471	0.995515			4.7	1.00157	0.994223	0.998637	1.00143	1.00468	1.00033	1.01087	1.0037	0.999896	1.00683	0.999737	0.99827	1.00304	0.99735	1.00044	0.999207	1.00697	1.00104
	4.8	0.998386	0.997758	1.00474	1.00512	1.00352	0.997326	1.00204	0.992281	0.995085	0.998532	0.993895	0.995673	0.994957	1.00354	1.00057	0.998653	1.00208	0.985106	1.00108	1.00127	1.00369	0.994188	1.00293	0.992466	0.994774			4.8	1.0004	0.989264	0.995228	0.992481	1.00468	1.0036	1.01792	1.00111	0.997292	1.00793	1.00237	0.99733	0.9971	0.99735	1.00372	0.995603	1.00386	0.999979
	4.9	0.999889	1.00281	1.00224	1.00955	1.00486	0.997326	0.993715	0.994474	0.994151	1.00076	1.0037	0.99889	1.00084	1.00169	1.00158	0.997755	1.001	0.99323	0.997842	1.00127	1.00143	0.991428	1.01608	0.994475	0.996255			4.9	1.00018	0.990504	0.994092	0.990243	1.00573	1.00469	1.00685	1.00499	1.0012	1.00463	0.99886	0.99733	1.00219	0.994551	1.00372	1.00281	1.00593	0.994682
	5	0.999264	1.00079	0.993733	1.00512	1.00083	1.00094	0.992675	1.00215	1.00443	1.00743	0.994923	0.994869	0.994957	1.00261	0.996527	0.997755	1.00208	0.99323	0.995685	1.0034	1.00256	0.992348	1.01702	0.994475	0.991814			5	1.00103	0.992983	0.994092	0.994719	1.00153	1.00142	1.00886	1.00887	0.999896	1.00024	1.00237	0.99827	1.00304	0.996417	1.00482	1.00191	1.00593	1.0021
	5.1	0.997812	1.00584	0.990734	1.0018	0.998146	0.992508	0.998918	0.994474	1.00443	1.00187	1.00109	0.996477	0.996919	0.997053	0.995517	0.993264	0.99233	0.99323	1.00216	1.00234	0.999163	0.997866	1.00293	0.991462	0.996995			5.1	0.99963	0.990504	0.995228	0.9936	1.00783	1.0036	1.00081	1.00111	1.0012	1.00683	0.997106	0.99827	1.00219	0.99735	1.00044	1.00011	1.00075	0.996801
	5.2	0.997922	1.00382	0.991901	1.0018	1.00083	0.997326	0.991634	0.99886	1.00163	0.99742	0.999034	0.997282	0.999863	1.00169	0.994507	0.993264	0.996663	0.992215	1	1.00446	1.00143	0.993268	1.00481	0.989453	0.996995			5.2	1.00178	0.985545	0.996364	0.994719	1.00888	1.01122	1.00282	1.00629	1.00641	1.00463	1.00149	0.99921	0.9971	0.99735	1.00482	1.00551	1.00801	0.999979
	5.3	0.999798	1.00382	0.996569	1.00955	1.00352	0.998531	0.995796	1.00215	1.00256	1.00965	0.99595	0.99889	1.00281	1.00539	0.999556	0.993264	0.99233	0.99323	1.00324	1.00234	1.00369	0.998786	1.00105	0.988448	0.994034			5.3	1.00216	0.989264	0.999773	0.992481	1.00783	1.0036	1.00282	1.01405	1.00771	1.00903	1.00324	0.99921	1.00049	0.996417	1.00263	1.00011	1.00697	1.00104
	5.4	0.999857	1.00281	0.987234	1.00955	1.00218	0.994917	1.001	0.991185	1.00443	0.999644	1.0052	1.0005	1.00379	1.00354	0.997536	0.995061	1.00425	1.00034	1.00216	1.00234	1.00029	0.998786	1.00387	0.990457	0.995515			5.4	0.99944	0.989264	0.994092	0.992481	1.00888	1.00469	1.00987	1.00111	0.999896	0.999144	0.999737	0.99639	0.994557	0.994551	1.00044	0.997405	1.00801	0.999979
	5.5	1.00008	1.00988	0.989568	1.01066	1.00486	0.992508	0.991634	0.992281	1.00723	1.00298	1.00006	1.00532	1.00183	1.00539	1.00057	0.995959	1.00316	1.00034	1.00108	1.00127	0.999163	1.00155	1.00293	0.985434	0.996255			5.5	1.00023	0.985545	0.998637	0.992481	1.00468	1.00033	0.998792	1.00241	1.00641	1.00573	1.00588	0.99827	0.9971	0.998283	1.00482	0.995603	1.01008	0.99892
	5.6	1.00121	1.00988	0.995402	1.00844	0.996803	0.992508	0.992675	0.991185	1.0063	1.00298	0.998006	1.00935	1.00673	1.00076	0.995517	1.00314	1.00533	1.00339	1.00971	1.00234	0.995768	1.01166	0.999174	0.993471	0.998475			5.6	0.998854	0.989264	1.00318	0.992481	1.00258	0.999237	1.00383	1.00111	1.0025	1.00024	0.997983	0.99733	0.994557	0.992685	0.999343	0.998306	1.00697	0.99892
	5.7	1.00335	1.01998	0.995402	1.01066	1.00218	0.994917	0.990594	0.991185	1.01938	1.0052	1.00212	1.01015	1.00869	1.00447	0.999556	1.00494	1.00641	1.0044	1.00755	1.00446	1.00029	1.01166	1.00293	0.985434	0.997735			5.7	0.999357	0.983066	0.994092	0.992481	1.00468	0.995968	1.00081	1.01146	1.01161	1.00463	0.99886	1.00109	0.997948	0.992685	1.00153	0.996504	1.00697	0.994682
	5.8	1.00461	1.01695	0.995402	1.00734	1.00352	0.998531	0.988512	0.99557	1.01938	1.00854	1.00726	1.019	1.01752	1.00261	0.996527	1.00763	1.00533	1.00643	1.00971	1.00446	0.999163	1.01258	1.00669	0.981416	1.0007			5.8	0.998514	0.984306	0.999773	0.9936	1.00363	0.994878	0.998792	1.00241	1.01161	1.00354	0.996229	1.00203	0.998796	0.993618	0.99606	0.993801	1.00593	0.995742
	5.9	1.00714	1.02603	0.998903	1.00955	1.00352	0.996122	0.993715	0.993377	1.02685	1.01188	1.00623	1.02221	1.02047	1.00169	1.00057	1.01212	1.01075	1.01151	1.00971	1.00552	1.00029	1.01718	1.00481	0.988448	0.999956			5.9	1.00064	0.985545	0.998637	0.995838	0.996284	0.993789	1.01289	1.00629	1.01552	1.00573	0.99886	1.00015	0.997948	0.998283	1.00701	0.996504	1.00697	0.994682
	6	1.00822	1.022	1.00124	1.01399	1.00218	0.994917	0.989553	0.996667	1.03059	1.01521	1.00726	1.02302	1.01851	1.00354	1.00258	1.01572	1.01183	1.01253	1.01079	1.00446	1.00482	1.02454	1.00856	0.98443	0.998475			6	0.999082	0.986785	0.999773	0.9936	0.997333	1.0036	1.00685	0.999819	1.01552	1.00573	0.99886	0.99827	0.992861	0.988954	0.999343	0.990197	1.00904	0.99786
	6.1	1.01094	1.02805	1.00007	1.01399	1.00218	0.993713	0.992675	0.99557	1.0362	1.01855	1.00006	1.02704	1.02832	1.00817	1.00864	1.022	1.02266	1.01557	1.01618	1.00977	1.00369	1.03189	1.01138	0.981416	0.994774			6.1	0.997547	0.985545	0.998637	0.989124	0.993134	0.99052	1.00584	1.00887	1.01292	1.00683	0.997106	1.00015	0.994557	0.989887	0.998249	0.988395	1.00386	0.994682
	6.2	1.01344	1.03209	1.0024	1.00734	0.995459	0.998531	0.991634	1.00105	1.04087	1.023	1.00828	1.02945	1.02734	1.01095	1.00965	1.0238	1.03025	1.01659	1.01402	1.01614	1.01387	1.03281	1.0142	0.98443	0.998475			6.2	0.998992	0.986785	0.998637	0.994719	0.997333	0.997058	1.00987	1.0037	1.01292	1.00354	1.00149	1.00109	0.993709	0.996417	0.99606	0.991098	1.00801	0.990445
	6.3	1.01609	1.03108	1.00941	1.01177	0.99949	0.996122	0.995796	0.997763	1.04274	1.02633	1.00623	1.04071	1.03224	1.01095	1.01066	1.03009	1.03241	1.02167	1.01726	1.0172	1.01727	1.03925	1.01138	0.985434	1.00292			6.3	0.999325	0.988025	0.998637	0.988005	0.995234	1.00142	1.00785	1.0037	1.01031	1.00134	0.999737	1.00391	1.00049	0.994551	0.997154	0.996504	1.00697	0.994682
	6.4	1.01823	1.03411	1.00707	1.01399	1.00218	0.994917	0.993715	0.993377	1.04087	1.03078	1.01034	1.0391	1.03519	1.01281	1.00965	1.03907	1.04541	1.0237	1.0205	1.01932	1.01614	1.04017	1.01983	0.992466	1.00292			6.4	0.998318	0.986785	0.999773	0.9936	0.999433	0.999237	1.00886	0.998525	1.00901	1.00134	0.992721	1.00297	0.992013	0.99735	0.997154	0.991999	1.00489	0.995742
	6.5	1.0207	1.03411	1.00941	1.0162	1.00352	1.00214	0.989553	1.00763	1.04274	1.03189	1.01651	1.03991	1.03028	1.01466	1.01167	1.03907	1.0465	1.02776	1.02481	1.02463	1.02066	1.04293	1.02359	0.991462	1.00514			6.5	0.999177	0.985545	1.00091	0.989124	1.00258	0.999237	1.00886	1.00241	1.00771	1.00244	0.997106	0.99921	0.989469	0.995484	1.00372	0.997405	1.00801	0.996801
	6.6	1.02168	1.03209	1.01641	1.01509	1.00486	0.999735	1.001	1.00434	1.04554	1.02967	1.01342	1.04232	1.03715	1.01559	1.01066	1.04176	1.04975	1.02878	1.02265	1.0257	1.02293	1.04753	1.01889	0.991462	1.00292			6.6	0.998947	0.985545	1.00659	0.988005	0.996284	0.994878	1.00483	1.00758	1.02073	0.998046	1.00061	0.99733	0.986078	0.999216	1.00153	0.991098	1.00801	0.995742
	6.7	1.02317	1.03007	1.01991	1.01399	1.00218	1.00455	0.996837	0.997763	1.04461	1.03189	1.01137	1.04393	1.03617	1.02485	1.01773	1.05254	1.0465	1.02979	1.02265	1.02994	1.02745	1.05121	1.02077	0.993471	1.00588			6.7	0.999777	0.989264	1.00318	0.991362	1.00048	0.995968	1.00685	1.01146	1.01422	1.00463	0.994475	0.99733	0.986078	1.00388	1.00153	0.993801	1.00489	0.996801
	6.8	1.02553	1.03209	1.02341	1.01842	1.00486	1.00817	1.00308	1.00215	1.04274	1.03745	1.0124	1.04232	1.03617	1.02578	1.02076	1.04715	1.04541	1.03385	1.02265	1.03313	1.03085	1.05305	1.02828	0.997489	1.01106			6.8	0.998936	0.985545	0.998637	0.988005	1.00048	0.994878	1.01389	1.00629	1.00901	0.999144	1.005	0.99733	0.987774	1.00015	1.00044	0.994702	1.00489	0.995742
	6.9	1.02607	1.03209	1.02341	1.02174	1.01292	1.00094	1.00204	0.996667	1.03993	1.02744	1.01753	1.03991	1.04107	1.02763	1.02278	1.05164	1.05083	1.03487	1.02913	1.03419	1.03424	1.05029	1.03016	0.997489	1.00662			6.9	1.00049	0.985545	1.00091	0.990243	1.00153	0.995968	1.00785	1.00758	1.01161	1.00354	0.999737	0.99921	0.990317	1.00668	1.00263	0.999207	1.01008	0.995742
	7	1.02814	1.02704	1.01991	1.02507	1.01292	1.00094	0.994756	0.991185	1.04554	1.03523	1.01034	1.04473	1.04206	1.03134	1.0248	1.05613	1.04758	1.04299	1.03236	1.04481	1.03877	1.05121	1.03486	1.00753	1.01328			7	0.999629	0.985545	1.00091	0.992481	1.00048	0.991609	1.00685	1.01534	1.01422	1.00573	0.993598	0.99733	0.98523	1.00388	0.999343	0.997405	1.00801	0.995742
	7.1	1.02951	1.03108	1.02341	1.02618	1.01024	0.998531	0.994756	0.997763	1.04647	1.03523	1.01856	1.04634	1.04402	1.03134	1.02783	1.04984	1.04216	1.03995	1.02913	1.04906	1.04782	1.05397	1.03768	1.00854	1.01846			7.1	0.998855	0.984306	1.00204	0.990243	0.996284	0.991609	1.00383	1.00629	1.01552	1.00024	0.997106	1.00015	0.989469	1.00015	0.998249	0.999207	1.00904	0.996801
	7.2	1.03045	1.02805	1.02574	1.02618	1.01427	1.00335	0.996837	0.996667	1.04554	1.02855	1.01856	1.0391	1.04009	1.03968	1.03085	1.04805	1.04866	1.04401	1.03236	1.05118	1.05235	1.05765	1.03955	1.00653	1.01698			7.2	1.00027	0.989264	0.998637	0.989124	0.998383	0.993789	1.01087	1.00758	1.01552	1.00134	0.996229	0.99921	0.992013	1.00015	1.00044	1.00101	1.01215	0.99892
	7.3	1.03193	1.023	1.02924	1.02507	1.00889	0.999735	0.997877	0.99557	1.05115	1.04079	1.01342	1.04715	1.04598	1.03875	1.03085	1.04715	1.05083	1.04706	1.03776	1.04906	1.05121	1.05857	1.04143	1.01356	1.02216			7.3	1.00187	0.986785	1.00204	0.988005	1.00048	0.992699	1.00886	1.01534	1.01161	1.00244	1.00412	1.00203	0.996252	1.00295	1.00372	1.00642	1.00904	0.99892
	7.4	1.03355	1.03007	1.02574	1.03061	1.01964	1.00094	0.996837	0.991185	1.05115	1.03634	1.02062	1.04393	1.045	1.04338	1.03388	1.05433	1.04866	1.0501	1.03883	1.0533	1.05461	1.05857	1.04331	1.01055	1.02364			7.4	0.999113	0.989264	1.00091	0.991362	1.00153	0.98834	1.00584	0.997232	1.01161	1.00354	0.999737	0.99827	0.986078	1.00388	1.00482	1.00191	1.00697	0.993623
	7.5	1.03371	1.03007	1.02808	1.02507	1.01292	1.00214	0.991634	0.992281	1.04928	1.03411	1.01856	1.05117	1.04696	1.04987	1.03792	1.05074	1.05083	1.04604	1.03883	1.05436	1.058	1.05397	1.04519	1.0226	1.01846			7.5	0.999019	0.989264	1.00091	0.988005	1.00048	0.98943	1.00685	1.0037	1.00771	1.00244	0.995352	1.00109	0.992013	1.00202	1.00263	1.00191	1.00697	0.992564
	7.6	1.03487	1.03613	1.02691	1.02839	1.01561	1.00094	0.994756	0.993377	1.05302	1.03856	1.02678	1.04875	1.045	1.04616	1.03388	1.05164	1.04758	1.0501	1.03991	1.05755	1.06027	1.05397	1.04613	1.01858	1.0229			7.6	1.00123	0.988025	0.997501	0.995838	1.00048	0.991609	1.00886	1.00758	1.02073	1.00573	1.00149	1.00015	0.988622	1.00668	1.00482	1.00011	1.00904	0.993623
	7.7	1.03556	1.03512	1.02924	1.03726	1.01964	1.00094	0.995796	0.994474	1.05488	1.04635	1.01856	1.04795	1.04304	1.04987	1.03489	1.04894	1.04758	1.04909	1.04207	1.05224	1.06027	1.05213	1.04331	1.0216	1.02808			7.7	1.00041	0.981826	0.998637	0.994719	0.996284	0.98943	1.00886	1.01146	1.00771	1.00463	1.00237	1.00203	0.990317	1.00575	1.00591	1.00551	1.01215	0.989386
	7.8	1.036	1.03613	1.03041	1.03172	1.01427	1.00455	0.992675	0.996667	1.05302	1.03967	1.02987	1.04875	1.04598	1.04709	1.03691	1.05433	1.04433	1.04807	1.04746	1.05967	1.05687	1.05121	1.04801	1.01457	1.03178			7.8	0.999046	0.978107	0.998637	0.989124	0.995234	0.991609	1.00685	1.01275	1.01682	1.00903	0.993598	1.00015	0.989469	1.00108	1.00044	0.999207	1.00593	0.995742
	7.9	1.03761	1.03108	1.03625	1.03615	1.01695	1.00937	0.999958	0.999956	1.05395	1.03856	1.02473	1.04875	1.04009	1.04709	1.03489	1.05344	1.04975	1.05112	1.04423	1.06073	1.06592	1.05397	1.04894	1.02562	1.03104			7.9	0.999819	0.979347	1.00204	0.988005	1.00573	0.992699	1.01188	1.00241	1.01161	1.00463	1.00061	1.00297	0.989469	1.00388	1.0081	0.999207	1.00282	0.991504
	8	1.03722	1.03714	1.03508	1.03061	1.01427	1.00696	1.00204	1.00105	1.05395	1.04635	1.02884	1.04473	1.03813	1.04616	1.03893	1.05164	1.04433	1.05315	1.04423	1.05755	1.06706	1.05213	1.04801	1.02361	1.02734			8	1.00136	0.981826	1.00091	0.990243	1.00153	0.992699	1.01591	1.01017	1.01031	1.00683	1.00324	1.00297	0.995405	1.00388	1.00701	0.997405	1.00697	0.995742
	8.1	1.03772	1.03714	1.03508	1.03947	1.02098	1.00937	0.997877	1.00105	1.05021	1.03856	1.03192	1.04473	1.04206	1.04524	1.03489	1.05164	1.05083	1.05112	1.04423	1.05543	1.06479	1.04569	1.04801	1.03164	1.03326			8.1	0.999956	0.981826	1.00091	0.990243	1.00258	0.991609	1.01188	1.00499	1.01422	1.01012	0.995352	1.00015	0.983534	1.00295	1.00919	1.00011	1.00489	0.994682
	8.2	1.03851	1.03512	1.03158	1.04058	1.02501	1.00696	0.998918	0.999956	1.05582	1.04857	1.02884	1.04554	1.03813	1.0508	1.03792	1.04984	1.04866	1.05416	1.03776	1.05755	1.0614	1.05213	1.05082	1.03265	1.03548			8.2	1.00036	0.978107	0.998637	0.991362	1.00048	0.994878	1.00987	1.01017	1.00901	1.00683	1.00324	1.00391	0.994557	1.00015	1.00701	0.998306	1.00489	0.994682
	8.3	1.038	1.03714	1.03858	1.04391	1.02233	1.00817	0.998918	0.999956	1.05488	1.03967	1.03295	1.04634	1.03911	1.04709	1.03388	1.04625	1.04758	1.05315	1.04099	1.0533	1.06479	1.05121	1.04894	1.02963	1.03326			8.3	1.00099	0.975628	1.00204	0.990243	1.00048	0.999237	1.01591	1.01146	1.01812	1.01342	0.997983	1.00109	0.987774	1.00015	1.00701	0.995603	1.00593	0.994682
	8.4	1.03778	1.03613	1.04208	1.03947	1.01561	1.00214	0.999958	0.994474	1.05582	1.04523	1.02987	1.04473	1.04107	1.04709	1.03691	1.04984	1.04975	1.05416	1.04423	1.04268	1.06253	1.05121	1.05176	1.03666	1.03326			8.4	0.999622	0.984306	1.00091	0.990243	1.00153	0.997058	1.01591	0.995939	1.00771	1.00354	0.996229	1.00015	0.991165	1.00481	1.00919	1.00371	1.00178	0.989386
	8.5	1.03694	1.03411	1.03858	1.0428	1.01964	1.00937	0.992675	1.00105	1.05488	1.04412	1.03604	1.03991	1.04009	1.04524	1.03489	1.04625	1.05083	1.05416	1.03776	1.04799	1.05461	1.05121	1.0527	1.02963	1.02808			8.5	1.00183	0.980587	0.999773	0.998075	1.00678	1.00469	1.00483	1.00758	1.01031	1.00573	1.00061	1.00109	0.991165	1.00761	1.01029	1.00551	1.00282	0.993623
	8.6	1.03616	1.03411	1.03858	1.04391	1.01561	1.00696	0.996837	0.997763	1.05488	1.04635	1.0309	1.04312	1.03617	1.04524	1.03691	1.04805	1.04758	1.05518	1.04207	1.04481	1.05687	1.04477	1.04331	1.02762	1.0303			8.6	0.999682	0.981826	1.00091	0.994719	1.00573	0.998148	1.01289	1.0037	1.00771	1.00463	0.993598	0.99545	0.984382	1.00668	1.00591	1.00191	1.00489	0.991504
	8.7	1.03826	1.03411	1.03625	1.05056	1.02367	1.01178	0.999958	1.00873	1.05769	1.04635	1.0309	1.03508	1.03421	1.04524	1.0359	1.04984	1.053	1.0562	1.04315	1.04906	1.05235	1.04845	1.04988	1.03265	1.03326			8.7	0.999459	0.978107	0.99182	0.9936	1.00363	0.997058	1.00987	1.00111	1.01031	1.00793	0.999737	1.00203	0.989469	1.00481	1.00482	1.00011	1.00489	0.991504
	8.8	1.03863	1.0331	1.04091	1.04945	1.02233	1.01178	0.999958	1.00544	1.05395	1.04523	1.03295	1.03991	1.03911	1.04709	1.04095	1.04715	1.04758	1.05416	1.04423	1.04481	1.06027	1.05213	1.04988	1.03064	1.034			8.8	0.998597	0.978107	1.00091	0.988005	1.00363	0.997058	1.0149	0.999819	1.00901	1.00244	1.00324	1.00109	0.986926	1.00015	1.00482	0.993801	1.00075	0.991504
	8.9	1.0391	1.03714	1.04558	1.04723	1.01695	1.01539	1.00308	1.00325	1.05769	1.04746	1.03912	1.04232	1.03813	1.04616	1.03489	1.04805	1.0465	1.05518	1.04531	1.05224	1.05235	1.04661	1.04988	1.03466	1.03326			8.9	1.00079	0.974388	1.00432	0.991362	1.00573	0.992699	1.00584	1.01146	1.01682	1.00793	1.00237	0.99921	0.988622	1.00015	1.0081	1.00281	1.00697	0.994682
	9	1.03813	1.03714	1.04325	1.05388	1.02501	1.01058	1.00204	1.00105	1.05675	1.04746	1.03809	1.03669	1.03322	1.04616	1.03691	1.04625	1.04541	1.05416	1.04854	1.05012	1.05574	1.03833	1.05176	1.02562	1.03104			9	0.998471	0.973149	0.999773	0.991362	1.00363	0.993789	1.01389	1.00758	1.01292	1.00573	0.996229	0.99545	0.986926	0.998283	1.00482	0.991999	1.00697	0.991504
	9.1	1.0386	1.03613	1.04558	1.05056	1.01964	1.01178	0.998918	1.00873	1.05769	1.04857	1.03809	1.0383	1.03617	1.04802	1.03388	1.04535	1.05083	1.0562	1.04639	1.04799	1.05461	1.04661	1.04707	1.03265	1.0266			9.1	0.998965	0.976868	0.999773	0.989124	1.00048	0.994878	1.01792	1.01146	1.00901	1.00573	0.999737	1.00015	0.986926	0.992685	1.00263	0.990197	1.00697	0.99786
	9.2	1.03811	1.03613	1.03625	1.04391	1.01695	1.01539	1.00412	1.00982	1.05582	1.05079	1.03809	1.0383	1.03911	1.04709	1.03287	1.04625	1.04975	1.05213	1.04315	1.04162	1.05348	1.04661	1.05176	1.03265	1.03252			9.2	0.99885	0.976868	0.998637	0.991362	1.00048	0.997058	1.01188	1.01017	1.01031	1.00463	1.00149	0.99921	0.981839	0.99735	1.00701	0.994702	1.00489	0.992564
	9.3	1.03763	1.03512	1.04091	1.04391	1.0183	1.0178	1.00516	1.00763	1.05582	1.05191	1.03912	1.03186	1.03617	1.04802	1.03287	1.04176	1.04866	1.05315	1.04315	1.04481	1.04895	1.04293	1.05082	1.03164	1.03252			9.3	0.997202	0.976868	1.00091	0.989124	0.996284	0.98834	1.01692	0.993352	1.01031	1.00244	1.00237	1.00015	0.988622	0.994551	1.0081	0.986593	1.00282	0.994682
	9.4	1.03831	1.03108	1.04208	1.04501	1.01695	1.02021	1.0062	1.00982	1.05769	1.04523	1.04323	1.0383	1.03715	1.04987	1.03489	1.04715	1.05191	1.05416	1.03883	1.04799	1.04895	1.04109	1.04988	1.02762	1.034			9.4	0.999581	0.978107	0.997501	0.992481	1.00573	0.998148	1.01087	1.00887	1.01422	1.00244	0.997983	0.99921	0.990317	0.998283	1.00263	0.996504	1.00489	0.994682
	9.5	1.03749	1.03209	1.04791	1.04945	1.02233	1.0178	1.00932	1.00434	1.05302	1.05079	1.03706	1.03106	1.03715	1.04524	1.03287	1.04356	1.05408	1.05315	1.03883	1.04268	1.04895	1.04201	1.04707	1.03164	1.02734			9.5	0.999034	0.973149	0.996364	0.992481	1.00468	1.00033	1.0149	1.0037	1.01292	1.00683	0.997983	0.99827	0.986926	0.999216	1.00591	0.995603	1.00282	0.991504
	9.6	1.03811	1.03411	1.04791	1.05166	1.0277	1.0178	1.00724	1.00544	1.05769	1.04857	1.04631	1.03347	1.03911	1.04987	1.03085	1.04535	1.04975	1.04909	1.03883	1.0395	1.04556	1.04293	1.04801	1.02762	1.0303			9.6	0.999293	0.976868	1.00318	0.9936	1.00048	0.997058	1.00987	0.999819	1.01422	1.00903	0.997106	0.99639	0.98523	1.00295	1.00372	1.00101	1.00489	0.992564
	9.7	1.03764	1.03108	1.04675	1.05499	1.02636	1.0178	1.0062	1.00544	1.05675	1.05079	1.04323	1.03428	1.04206	1.05172	1.03186	1.04445	1.04866	1.05112	1.03344	1.03631	1.04669	1.03925	1.05176	1.02361	1.02882			9.7	0.99915	0.973149	1.00432	0.989124	0.996284	0.994878	1.01289	1.00629	1.00901	1.00573	0.99886	1.00109	0.992013	1.00295	1.00591	0.995603	1.00489	0.992564
	9.8	1.03831	1.03916	1.04791	1.0572	1.0277	1.02142	1.00308	1.00653	1.05862	1.04746	1.04631	1.03428	1.04009	1.04987	1.02985	1.03458	1.04866	1.04706	1.0356	1.03844	1.04556	1.04569	1.04894	1.03064	1.03474			9.8	0.997984	0.974388	1.00318	0.9936	0.999433	0.993789	1.02195	0.995939	1.0038	0.999144	0.997106	1.00109	0.98523	0.998283	1.00482	0.996504	1.00386	0.993623
	9.9	1.03806	1.0331	1.04675	1.0561	1.0277	1.02142	1.001	1.00982	1.05956	1.05413	1.04426	1.03026	1.03519	1.04802	1.03186	1.04086	1.05191	1.04706	1.03668	1.04162	1.05008	1.04201	1.04894	1.0226	1.03252			9.9	0.997624	0.978107	0.998637	0.982411	0.996284	0.999237	1.0149	1.00758	1.01031	1.00024	0.997106	1.00203	0.98523	0.995484	1.00482	0.9929	1.00282	0.991504
	10	1.03721	1.03512	1.04908	1.04945	1.01964	1.02262	1.0062	1.00873	1.05395	1.04968	1.04734	1.02784	1.03421	1.04709	1.02985	1.04356	1.05191	1.04502	1.03452	1.04162	1.04556	1.04477	1.04613	1.02963	1.02956			10	0.99894	0.975628	0.997501	0.985767	1.00048	0.992699	1.01792	1.01534	1.01292	1.00134	1.00061	1.00109	0.984382	1.00108	1.0081	0.993801	1.00075	0.992564
	10.1	1.03677	1.03209	1.04675	1.0561	1.0277	1.02503	1.00516	1.00873	1.05675	1.04079	1.03912	1.02382	1.03224	1.04802	1.03489	1.03727	1.05083	1.04299	1.0356	1.04268	1.04669	1.04385	1.04707	1.02863	1.02956			10.1	0.999827	0.974388	1.00432	0.98353	1.00363	0.997058	1.01591	1.01017	1.01161	1.00244	1.00149	1.00485	0.992013	1.00108	1.00482	0.996504	1.00386	0.989386
	10.2	1.03678	1.03411	1.04441	1.0561	1.02636	1.02383	1.00932	1.00215	1.06329	1.05191	1.03501	1.02302	1.03617	1.04524	1.03085	1.04176	1.05083	1.04096	1.03452	1.03844	1.04895	1.04477	1.04613	1.02863	1.02586			10.2	0.99878	0.970669	1.00545	0.985767	0.999433	1.00033	1.0149	1.00758	1.01422	1.00354	0.995352	1.00203	0.989469	0.99735	1.00701	0.9929	1.00282	0.990445
	10.3	1.03878	1.03512	1.04791	1.0572	1.02904	1.02623	1.01036	1.01202	1.06516	1.05302	1.0422	1.02543	1.03421	1.04524	1.03287	1.04176	1.05083	1.04604	1.0356	1.03844	1.05008	1.04201	1.04894	1.03064	1.0303			10.3	1.00012	0.970669	1.00773	0.985767	1.00468	0.994878	1.01591	1.01793	1.01161	1.00244	0.99886	1.00297	0.987774	0.999216	1.0081	0.999207	1.00489	0.989386
	10.4	1.03687	1.03411	1.05258	1.0572	1.02904	1.02744	1.00828	1.00544	1.05956	1.04523	1.04837	1.02141	1.04009	1.03875	1.02783	1.04356	1.04866	1.04299	1.03344	1.03313	1.04669	1.03833	1.04519	1.02863	1.02882			10.4	0.997285	0.970669	0.997501	0.986886	1.00048	0.991609	1.01087	1.00758	1.01422	1.00463	0.99886	1.00391	0.983534	0.995484	0.999343	0.999207	1.00178	0.987267
	10.5	1.03791	1.03108	1.04908	1.05388	1.0277	1.02503	1.00932	1.00763	1.06423	1.05747	1.04323	1.0198	1.03519	1.04338	1.03186	1.04086	1.05625	1.04502	1.0356	1.03207	1.04556	1.04385	1.04801	1.03566	1.02808			10.5	0.998459	0.975628	1.00432	0.982411	1.00153	0.998148	1.01893	1.00499	1.01292	1.00463	0.997983	1.00203	0.987774	0.992685	1.00372	0.986593	1.00801	0.991504
	10.6	1.03869	1.03007	1.05258	1.05499	1.02501	1.03105	1.01244	1.01202	1.06049	1.05524	1.04734	1.02061	1.04107	1.04524	1.02884	1.04535	1.05625	1.03893	1.03776	1.02676	1.04329	1.04753	1.05176	1.03666	1.02734			10.6	0.997953	0.973149	0.998637	0.98353	0.997333	0.999237	1.01893	1.01017	1.01031	1.00244	1.00324	1.00203	0.984382	0.993618	1.00701	0.984791	1.00489	0.991504
	10.7	1.03808	1.0331	1.04908	1.05277	1.02636	1.02985	1.01453	1.01202	1.06423	1.05191	1.05042	1.0198	1.03322	1.03968	1.02682	1.04356	1.05516	1.04299	1.03991	1.02994	1.04442	1.04569	1.05176	1.02562	1.03104			10.7	0.997385	0.975628	1.00545	0.982411	1.00573	0.995968	1.01591	1.00241	1.00641	0.999144	0.994475	0.99921	0.986926	0.995484	1.0081	0.991098	1.00075	0.990445
	10.8	1.03782	1.03815	1.05608	1.05499	1.0277	1.02864	1.01557	1.01092	1.05582	1.05524	1.04529	1.0198	1.03519	1.03783	1.02783	1.03907	1.06058	1.03995	1.0356	1.0257	1.03877	1.04385	1.05176	1.03466	1.02882			10.8	0.998673	0.970669	1.00204	0.988005	1.00048	0.991609	1.0149	1.01017	1.01292	1.00134	1.00061	1.00109	0.991165	0.998283	1.00482	0.9929	1.00282	0.993623
	10.9	1.03646	1.03007	1.05025	1.05499	1.02904	1.03105	1.01453	1.01092	1.05956	1.05302	1.04529	1.01739	1.03028	1.04153	1.03085	1.04086	1.0465	1.03893	1.03668	1.02994	1.03877	1.04477	1.04707	1.02762	1.02512			10.9	0.99722	0.974388	1.00432	0.986886	0.999433	0.997058	1.01188	0.992058	1.0038	0.999144	1.00061	1.00297	0.995405	0.993618	1.00591	0.985692	1.00593	0.993623
	11	1.03586	1.02805	1.04791	1.05388	1.02501	1.03226	1.01453	1.01311	1.05956	1.05524	1.04529	1.01578	1.03322	1.03783	1.0248	1.03637	1.053	1.0369	1.03128	1.03207	1.03198	1.05121	1.04894	1.02662	1.02586			11	0.998912	0.973149	1.00091	0.984648	0.993134	1.0036	1.0149	1.01405	1.0038	0.999144	0.99886	1.00485	0.994557	0.995484	1.0081	0.993801	1.00489	0.993623
	11.1	1.0361	1.02805	1.04908	1.05499	1.02367	1.02744	1.01973	1.01092	1.05862	1.05302	1.05042	1.01256	1.03224	1.0369	1.02682	1.03278	1.05191	1.03893	1.03452	1.03313	1.03311	1.04569	1.05176	1.03064	1.02956			11.1	0.997387	0.976868	0.998637	0.982411	1.00363	0.995968	1.01792	0.995939	1.01292	1.00024	0.994475	1.00109	0.98523	0.99735	1.00372	0.993801	1.00282	0.992564
	11.2	1.03697	1.03108	1.05258	1.0561	1.02636	1.03226	1.01557	1.0175	1.05862	1.05635	1.04734	1.01578	1.02636	1.0406	1.03186	1.03368	1.05191	1.0369	1.03452	1.0395	1.03198	1.04477	1.04707	1.02762	1.03104			11.2	0.999075	0.980587	1.00204	0.982411	0.998383	1.00795	1.01289	0.998525	1.01031	1.00244	1.00237	1.00391	0.989469	0.994551	1.0081	0.9929	1.00593	0.991504
	11.3	1.03578	1.02704	1.05142	1.06053	1.03173	1.03226	1.01349	1.01311	1.05675	1.04857	1.04837	1.01658	1.03322	1.03412	1.02783	1.03637	1.05083	1.0369	1.03236	1.03525	1.03424	1.03833	1.04331	1.02361	1.03252			11.3	0.998232	0.971909	0.992956	0.986886	1.00153	1.0036	1.01893	1.00241	1.01161	1.00024	0.997106	1.00109	0.993709	0.994551	1.00482	0.997405	1.00075	0.990445
	11.4	1.03592	1.02704	1.05492	1.05388	1.02904	1.02864	1.01661	1.01311	1.06142	1.05413	1.04323	1.0198	1.03322	1.03319	1.02581	1.03817	1.05083	1.03385	1.03236	1.03525	1.03877	1.04201	1.04143	1.02361	1.03178			11.4	0.998412	0.974388	0.998637	0.984648	1.00048	1.00251	1.01792	1.0037	1.01161	1.00244	0.994475	1.00391	0.986078	0.99735	1.00482	0.994702	1.00489	0.990445
	11.5	1.03715	1.02906	1.05608	1.05499	1.02904	1.03226	1.01869	1.0164	1.06516	1.05858	1.0494	1.01578	1.03224	1.03319	1.02682	1.03907	1.05083	1.03385	1.03452	1.03844	1.03424	1.03833	1.04613	1.02963	1.02882			11.5	0.996711	0.976868	1.00659	0.977935	1.00258	1.00795	1.0149	0.994645	1.00641	0.996948	0.988336	0.99921	0.983534	0.994551	1.00372	0.995603	1.00386	0.990445
	11.6	1.0355	1.02502	1.05375	1.0561	1.03039	1.03467	1.01869	1.01421	1.05769	1.05302	1.04734	1.02382	1.03421	1.02949	1.02581	1.03907	1.04216	1.03284	1.02913	1.03738	1.03311	1.03925	1.04049	1.0226	1.03178			11.6	0.99678	0.973149	1.00204	0.981292	1.00048	1.00142	1.01289	0.998525	1.00771	1.00024	0.996229	0.99827	0.987774	0.991753	1.00701	0.997405	1.00075	0.988327
	11.7	1.03527	1.023	1.05608	1.05277	1.02636	1.03105	1.02077	1.00873	1.06049	1.05079	1.04734	1.01658	1.03322	1.02949	1.0248	1.03547	1.05083	1.03588	1.02805	1.03525	1.03198	1.03925	1.04613	1.02963	1.03252			11.7	0.996643	0.973149	0.996364	0.982411	1.00573	1.00251	1.02094	0.998525	1.00901	1.00024	0.986582	0.99827	0.977599	0.994551	1.00701	0.994702	1.00489	0.990445
	11.8	1.03583	1.02603	1.05725	1.05831	1.02636	1.02985	1.02285	1.01092	1.06516	1.05191	1.04117	1.02543	1.03224	1.02949	1.0248	1.03817	1.05083	1.02979	1.02589	1.0395	1.03537	1.04017	1.04425	1.0216	1.03252			11.8	0.996811	0.96819	0.995228	0.98353	1.00468	1.00142	1.01893	1.00629	1.00771	0.999144	0.992721	1.00109	0.983534	0.995484	1.00591	0.9929	1.00282	0.986208
	11.9	1.03662	1.02502	1.05608	1.05499	1.02904	1.03105	1.02181	1.00982	1.0661	1.05747	1.04529	1.01819	1.03224	1.02485	1.0248	1.03907	1.05841	1.03182	1.02805	1.03738	1.03537	1.04201	1.04237	1.03365	1.034			11.9	0.998816	0.974388	0.997501	0.98353	1.01098	1.0036	1.01692	1.00629	1.00771	0.999144	0.991844	0.99827	0.983534	0.992685	1.0081	0.997405	1.00801	0.999979
	12	1.03637	1.02603	1.05842	1.04834	1.02098	1.02985	1.01661	1.01531	1.06423	1.05302	1.05248	1.01578	1.03421	1.03227	1.02783	1.03727	1.05408	1.03588	1.02697	1.0395	1.0365	1.04109	1.04519	1.02863	1.03252			12	0.999654	0.973149	0.997501	0.981292	1.01098	1.00469	1.01893	1.00887	1.01422	1.00683	0.99886	1.00109	0.990317	0.99735	1.00591	0.991999	1.00593	0.986208
	12.1	1.03679	1.02805	1.05608	1.05942	1.0277	1.02864	1.02389	1.00105	1.06796	1.05413	1.04734	1.01739	1.03322	1.03505	1.03388	1.03727	1.05733	1.03284	1.02805	1.03738	1.03198	1.03557	1.04331	1.03365	1.03178			12.1	0.996659	0.970669	1.00204	0.977935	1.00048	1.00469	1.01692	0.999819	1.0012	0.996948	0.996229	1.00109	0.986078	0.996417	1.00482	0.994702	1.00697	0.986208
	12.2	1.03534	1.02704	1.05492	1.05499	1.02636	1.02262	1.01973	1.00763	1.05675	1.05413	1.05042	1.01578	1.03617	1.02763	1.02581	1.03727	1.06058	1.03182	1.02481	1.03844	1.03424	1.03557	1.04331	1.02963	1.03252			12.2	0.99681	0.970669	0.999773	0.981292	1.00573	1.00142	1.01087	1.00629	1.00771	1.00134	0.992721	0.99921	0.986926	0.995484	1.00919	0.990197	1.00075	0.986208
	12.3	1.03585	1.02704	1.05958	1.04834	1.02233	1.02383	1.02181	1.01092	1.06236	1.05747	1.05145	1.01498	1.03421	1.03041	1.03287	1.03368	1.0595	1.03182	1.02697	1.03738	1.03424	1.03741	1.04707	1.02361	1.03104			12.3	0.998745	0.973149	1.00659	0.985767	1.01098	1.0036	1.0149	0.997232	1.00901	0.99585	0.99886	1.00485	0.9971	0.99735	1.00591	0.987494	1.00593	0.984089
	12.4	1.0344	1.022	1.05492	1.05056	1.02233	1.02383	1.01661	1.01092	1.05769	1.05413	1.05145	1.01417	1.03715	1.02393	1.02278	1.03547	1.05625	1.03182	1.02913	1.03525	1.03537	1.04017	1.04707	1.0216	1.03104			12.4	0.996519	0.974388	0.998637	0.986886	1.00468	1.00469	1.01792	0.992058	0.997292	0.99585	0.997983	1.00485	0.986926	0.999216	1.00701	0.986593	1.00282	0.98303
	12.5	1.03452	1.023	1.05492	1.04834	1.02098	1.02744	1.01765	1.00873	1.06049	1.05524	1.04734	1.01417	1.03519	1.02763	1.02581	1.03907	1.05408	1.03487	1.0302	1.03419	1.03537	1.03833	1.04613	1.02059	1.02882			12.5	0.997956	0.96943	1.00091	0.985767	1.00888	0.998148	1.01087	0.998525	1.01161	1.00354	1.00149	1.00297	0.98523	1.00015	1.00372	0.9929	1.00489	0.986208
	12.6	1.03468	1.02603	1.05725	1.05277	1.02501	1.02744	1.02077	1.01092	1.05956	1.05524	1.04734	1.00854	1.03126	1.02115	1.02076	1.03458	1.05841	1.03487	1.03128	1.04162	1.03311	1.04017	1.04143	1.0226	1.0303			12.6	0.994842	0.971909	0.999773	0.980173	0.999433	1.00033	1.01188	0.995939	1.0012	0.99585	0.993598	0.99827	0.981839	0.995484	1.00591	0.987494	1.00386	0.989386
	12.7	1.03523	1.02502	1.04908	1.04501	1.02098	1.02744	1.02181	1.00982	1.06329	1.0608	1.04426	1.01176	1.03322	1.03041	1.02783	1.03907	1.05733	1.03284	1.02805	1.03844	1.03311	1.03833	1.04707	1.02662	1.034			12.7	0.996157	0.96943	1.00432	0.984648	1.00258	0.999237	1.01188	0.989472	1.0038	1.00244	0.995352	1.00109	0.98523	0.994551	1.00591	0.988395	1.00801	0.988327
	12.8	1.03516	1.02704	1.06425	1.05056	1.02636	1.02623	1.02077	1.00325	1.05956	1.05635	1.05659	1.00532	1.03028	1.02578	1.0248	1.03368	1.06058	1.03182	1.02913	1.03738	1.0365	1.03649	1.04331	1.02461	1.03326			12.8	0.997282	0.974388	1.00318	0.98353	1.00573	0.995968	1.00483	1.00887	1.0038	1.00354	0.995352	1.00391	0.982686	0.996417	1.0081	0.989296	1.00904	0.985149
	12.9	1.03539	1.02704	1.06075	1.04945	1.02367	1.02383	1.01765	1.01202	1.06329	1.0608	1.0494	1.00693	1.03322	1.02578	1.0248	1.03637	1.06491	1.03182	1.02913	1.03738	1.03537	1.03189	1.04143	1.03064	1.03178			12.9	0.996578	0.973149	0.995228	0.98353	1.00993	1.00033	1.0149	0.995939	0.998594	0.996948	0.997106	1.00203	0.98523	0.99735	1.0081	0.989296	1.01008	0.984089
	13	1.03499	1.02603	1.05958	1.04945	1.02367	1.02985	1.01765	1.01202	1.06049	1.05969	1.05248	1.00774	1.03126	1.02207	1.02278	1.03278	1.05733	1.03182	1.0302	1.04375	1.0365	1.03098	1.04049	1.03164	1.02956			13	0.996154	0.96695	0.999773	0.980173	1.00573	0.999237	1.01087	1.00241	1.0012	1.00134	0.997106	1.00015	0.978447	0.995484	1.01138	0.990197	1.01008	0.984089
	13.1	1.03367	1.02704	1.06192	1.04834	1.02098	1.02503	1.01765	1.00982	1.05862	1.05747	1.05042	1.00854	1.02734	1.02115	1.02682	1.03188	1.06058	1.03385	1.02697	1.03313	1.03424	1.03098	1.04331	1.02461	1.02734			13.1	0.99517	0.96571	1.00318	0.980173	1.00783	0.999237	1.00483	0.997232	1.0025	0.999144	0.99886	0.99921	0.983534	0.993618	1.00701	0.984791	1.00801	0.98303
	13.2	1.03323	1.01998	1.05025	1.05388	1.02636	1.02864	1.02181	1.01202	1.06142	1.05302	1.04734	1.00211	1.02636	1.02207	1.02682	1.03727	1.053	1.03182	1.03128	1.03207	1.0365	1.0273	1.04237	1.02361	1.0303			13.2	0.995881	0.96571	1.00091	0.981292	1.00783	0.997058	1.0149	0.995939	0.997292	1.00244	1.00061	1.00485	0.989469	0.989887	1.00263	0.98389	1.00801	0.987267
	13.3	1.03369	1.01695	1.05842	1.05166	1.02098	1.02503	1.01869	1.01092	1.05862	1.05969	1.0422	1.00774	1.03224	1.02115	1.0248	1.03817	1.05733	1.02878	1.02805	1.03313	1.03764	1.03098	1.04425	1.03164	1.02956			13.3	0.995	0.96943	0.997501	0.981292	1.00363	0.995968	1.01591	0.990765	0.998594	1.00024	1.00237	1.00015	0.984382	0.994551	1.01138	0.982989	1.00282	0.98303
	13.4	1.03342	1.01695	1.05958	1.05166	1.02501	1.02503	1.02077	1.01421	1.05956	1.05413	1.05454	1.00774	1.0293	1.01837	1.02379	1.03188	1.05625	1.03284	1.02157	1.02888	1.03877	1.02822	1.04425	1.03064	1.02808			13.4	0.995593	0.96695	0.998637	0.980173	1.00678	0.999237	1.0149	0.994645	0.99599	0.998046	0.99886	0.99921	0.984382	0.998283	1.00591	0.991999	1.00593	0.985149
	13.5	1.03333	1.01998	1.05725	1.0428	1.01964	1.02503	1.01973	1.02189	1.05956	1.06414	1.04631	1.00935	1.0293	1.01466	1.02076	1.03637	1.05841	1.02979	1.02697	1.02676	1.03764	1.03189	1.04237	1.03064	1.02882			13.5	0.994623	0.970669	1.00204	0.981292	0.996284	0.98943	1.01188	0.998525	1.00641	1.00244	0.993598	0.99921	0.984382	0.995484	1.00701	0.982989	1.00075	0.986208
	13.6	1.03279	1.022	1.05958	1.03947	1.01964	1.02744	1.01661	1.00763	1.06703	1.05524	1.05556	1.00613	1.02832	1.01744	1.0248	1.03727	1.05733	1.02878	1.02373	1.03207	1.03311	1.02454	1.04425	1.03164	1.02734			13.6	0.998051	0.96943	1.00091	0.981292	0.999433	0.999237	1.01792	1.00499	1.0025	1.00134	0.999737	1.00485	0.990317	0.999216	1.01248	0.991098	1.00697	0.985149
	13.7	1.03318	1.01998	1.05842	1.04945	1.02501	1.02021	1.01765	1.01531	1.06236	1.05969	1.05145	1.00291	1.03028	1.01837	1.02379	1.03547	1.05625	1.02878	1.02373	1.031	1.03085	1.03098	1.04613	1.03164	1.0266			13.7	0.996419	0.96819	1.00091	0.981292	1.00153	1.00033	1.00987	0.995939	0.994688	1.00134	1.00149	1.00391	0.986926	0.999216	1.01029	0.991098	1.00697	0.985149
	13.8	1.03248	1.01796	1.05958	1.04612	1.02098	1.02503	1.02285	1.01531	1.06049	1.05969	1.0494	1.0005	1.02832	1.02022	1.02278	1.03637	1.06058	1.02979	1.02589	1.02782	1.03424	1.02638	1.04331	1.0216	1.02438			13.8	0.993394	0.96819	1.00091	0.980173	1.00048	0.998148	1.00584	0.988178	0.990782	1.00354	0.996229	0.99921	0.981839	0.995484	1.00591	0.990197	1.00697	0.975615
	13.9	1.03293	1.023	1.05958	1.04391	1.02233	1.02503	1.01765	1.01421	1.06049	1.05858	1.05659	1.00372	1.03224	1.02022	1.02177	1.03727	1.05841	1.02674	1.02805	1.02676	1.03311	1.03373	1.04143	1.0226	1.0229			13.9	0.9955	0.96943	1.00318	0.985767	1.00048	0.993789	1.00886	0.995939	0.990782	1.00463	1.00061	1.00579	0.986926	0.995484	1.01029	0.979385	1.00593	0.986208
	14	1.03141	1.01594	1.06192	1.03837	1.01427	1.02383	1.01869	1.01531	1.05956	1.06414	1.04837	1.00291	1.03322	1.01559	1.02177	1.03188	1.05516	1.02776	1.02373	1.0257	1.03085	1.03006	1.04425	1.03064	1.01994			14	0.995974	0.971909	1.00432	0.984648	1.00468	0.995968	1.00584	0.994645	0.998594	0.994752	1.00149	1.00579	0.986078	0.998283	1.00482	0.986593	1.00801	0.985149
	14.1	1.03218	1.01695	1.05725	1.04501	1.02098	1.02623	1.02285	1.02189	1.05956	1.05858	1.05762	0.998086	1.0293	1.01281	1.01672	1.03637	1.05516	1.02878	1.02481	1.02994	1.03198	1.03465	1.04425	1.0226	1.01994			14.1	0.994325	0.96943	1.00318	0.985767	1.00363	0.99052	1.01087	0.993352	0.990782	0.996948	0.993598	1.00109	0.980991	0.995484	1.01138	0.987494	1.00386	0.985149
	14.2	1.03298	1.01089	1.05958	1.04612	1.02501	1.02864	1.01973	1.01202	1.06049	1.05747	1.05556	1.0005	1.03126	1.01651	1.02177	1.03458	1.06383	1.02471	1.03128	1.02994	1.03198	1.04017	1.04519	1.02361	1.02068			14.2	0.994081	0.961991	0.998637	0.982411	1.00048	0.993789	1.00685	0.992058	0.990782	0.998046	0.997106	1.00391	0.98523	0.999216	1.01029	0.987494	1.00593	0.985149
	14.3	1.03192	1.0119	1.05492	1.04169	1.02367	1.02383	1.02077	1.01421	1.06142	1.06191	1.0494	0.999694	1.03126	1.01929	1.02682	1.03188	1.0595	1.02573	1.02697	1.02888	1.03764	1.03281	1.04331	1.01557	1.0229			14.3	0.994579	0.964471	0.999773	0.984648	0.999433	1.00142	1.00886	0.993352	0.999896	0.999144	0.994475	1.00015	0.977599	1.00202	1.0081	0.986593	1.00489	0.98303
	14.4	1.03205	1.01493	1.05258	1.04058	1.02233	1.02503	1.02181	1.0164	1.06236	1.05969	1.05248	0.99889	1.03224	1.01559	1.0248	1.03368	1.0595	1.02979	1.02805	1.02994	1.0365	1.03465	1.03674	1.01858	1.02216			14.4	0.995016	0.96819	0.999773	0.982411	1.00363	0.993789	1.01792	0.985591	0.999896	1.00024	0.995352	1.00109	0.980991	1.00108	1.00591	0.988395	1.00904	0.981971
	14.5	1.03214	1.01493	1.05258	1.0428	1.02367	1.03467	1.01557	1.01969	1.06703	1.05635	1.04734	1.00211	1.02734	1.01651	1.01975	1.03907	1.05516	1.03081	1.03344	1.02463	1.03764	1.03098	1.03674	1.02562	1.01698			14.5	0.996058	0.96819	1.00659	0.985767	0.997333	1.00251	1.00785	1.0037	0.993386	1.00244	0.994475	1.00485	0.979295	0.998283	1.01248	0.984791	1.00697	0.984089
	14.6	1.03147	1.01695	1.05492	1.03947	1.01561	1.03346	1.02077	1.01421	1.05675	1.05747	1.05454	1.0005	1.03322	1.01559	1.02278	1.03458	1.06275	1.02979	1.0302	1.02357	1.03764	1.03373	1.03955	1.01256	1.01476			14.6	0.995243	0.96819	0.995228	0.986886	1.00048	0.991609	1.01289	0.995939	1.0012	0.998046	0.997106	1.00203	0.983534	1.00202	1.01248	0.985692	1.00489	0.980911
	14.7	1.03164	1.01695	1.05842	1.0428	1.02098	1.03105	1.01869	1.01531	1.06049	1.05747	1.05248	1.0013	1.03519	1.01095	1.0147	1.03368	1.06166	1.02776	1.02913	1.02251	1.03424	1.03281	1.03392	1.02762	1.0192			14.7	0.994905	0.96943	0.999773	0.98353	1.00153	0.99052	1.00584	0.995939	0.993386	0.993654	0.99886	1.00109	0.983534	1.00575	1.01138	0.990197	1.00593	0.98303
	14.8	1.03253	1.01089	1.06075	1.04723	1.02636	1.03707	1.02077	1.0164	1.0661	1.06191	1.04837	0.995673	1.03322	1.01188	1.01874	1.03907	1.05841	1.02878	1.03128	1.02357	1.03537	1.03465	1.03674	1.02059	1.01698			14.8	0.994688	0.974388	0.992956	0.981292	0.998383	1.00142	1.01692	0.993352	0.992084	0.994752	0.996229	1.00297	0.981839	1.00015	1.01248	0.985692	1.00282	0.981971
	14.9	1.03213	1.01594	1.05142	1.04058	1.02367	1.03226	1.01869	1.01311	1.06142	1.05969	1.0494	1.00452	1.04009	1.01559	1.0248	1.03907	1.06275	1.0237	1.03128	1.02251	1.03198	1.03098	1.03768	1.0216	1.01846			14.9	0.99342	0.96819	0.996364	0.98353	1.00783	0.997058	1.00785	0.993352	0.993386	0.994752	0.997106	1.00109	0.984382	1.00108	0.992776	0.985692	1.00489	0.978793
	15	1.03249	1.01291	1.05608	1.0428	1.02233	1.03467	1.01557	1.0175	1.06049	1.06303	1.05659	1.00291	1.03911	1.01281	1.01975	1.03278	1.05733	1.02878	1.03236	1.02357	1.03198	1.03465	1.04237	1.01959	1.01994			15	0.992721	0.96943	0.994092	0.982411	1.00153	0.991609	1.00886	0.999819	0.992084	0.998046	0.99886	1.00015	0.981839	0.988954	1.00372	0.97488	1.00801	0.981971
[truncated: 122 more columns]
