# Supplementary material for: FRET kinase sensor development reveals SnRK2/OST1 activation by ABA but not by MeJA and high CO2 during stomatal closure
Source: eLife. 2020 May 28;9:e56351. doi: 10.7554/eLife.56351 (PMC7289597; doi:10.7554/eLife.56351)
Supplement: Figure 5—figure supplement 1—source data 1. [file elife-56351-fig5-figsupp1-data1.xlsx]

## Sheet: Figure 5-figure supplement 1
Figure 5- figure supplement 1A		Normalized ratio														Figure 5- figure supplement 1B		Normalized ratio																Figure 5- figure supplement 1C		Normalized ratio
	Time (min)	Average	Stomate_1	Stomate_2	Stomate_3	Stomate_4	Stomate_5	Stomate_6	Stomate_7	Stomate_8	Stomate_9	Stomate_10	Stomate_11	Stomate_12			Time (min)	average	Stomate_1	Stomate_2	Stomate_3	Stomate_4	Stomate_5	Stomate_6	Stomate_7	Stomate_8	Stomate_9	Stomate_10	Stomate_11	Stomate_12	Stomate_13	Stomate_14			Time (min)	average	Stomate_1	Stomate_2	Stomate_3	Stomate_4	Stomate_5	Stomate_6	Stomate_7	Stomate_8	Stomate_9	Stomate_10	Stomate_11	Stomate_12	Stomate_13
	0.1	1.00046	0.998265	1.00155	0.997877	0.990667	1.00465	0.998595	0.998103	1.00335	1.00366	1.00068	0.991366	1.01672			0.1	1.0018	0.998214	0.998773	1.00424	1.00868	0.99631	0.999072	0.998271	1.00373	0.999517	1.0119	1.00264	1.00371	1.00077	0.999404			0.1	1.00307	0.99733	0.998945	0.992232	1.00016	0.998949	1.00333	1.00959	0.999311	1.00573	1.00239	0.997858	0.998013	1.0031
	0.2	1.00283	1.00106	1.00671	1.00123	0.997588	1.00465	0.997695	1.00216	1.00736	1.00108	1.00461	0.995632	1.01413			0.2	1.00218	1.00467	1.00935	1.0067	1.00765	1.00311	0.999072	0.998271	1.00373	0.999517	1.00645	1.00063	1.0014	0.996708	0.993241			0.2	1.00264	0.993847	0.9966	0.994164	0.999027	0.998949	1.00454	1.00621	1.00314	0.998908	1.00239	0.993616	1.00163	1.00453
	0.3	1.00045	1.00106	1.00671	0.997877	0.99561	1.00279	0.992292	0.994049	0.997334	0.999794	1.00592	0.996485	1.01543			0.3	1.00209	1.00359	1.00512	1.00424	1.00558	1.00602	1.00894	1.00118	1.00558	0.99732	1.00827	0.998609	0.997951	0.99366	0.993241			0.3	1.00133	0.99733	0.989565	0.996097	1.00355	0.994845	1.00211	1.00734	0.997399	1.0046	1.00076	0.994677	0.998013	0.998795
	0.4	1.00076	1.00013	1.00774	0.998994	0.993633	1.00651	0.997695	0.998103	1.00335	0.993343	1.00199	0.994779	1.01284			0.4	1.00214	1.00144	1.003	1.00752	1.00765	1.00019	1.00105	0.998271	1.00096	0.99732	1.00827	1.00365	1.00256	0.999756	0.998377			0.4	1.00044	0.999652	0.997772	0.993198	1.00355	0.998129	0.99604	0.99946	0.993574	0.99777	0.995833	0.997858	1.00163	1.00167
	0.5	1.00144	1.002	1.00981	1.00346	0.99561	1.00279	0.995894	0.998103	1.00636	0.999794	0.995442	0.993926	1.01413			0.5	1.00007	0.997139	1.00089	1.00588	1.00248	1.00019	0.991174	0.998271	1.0065	1.00062	1.00645	1.00365	0.9968	0.99874	0.992214			0.5	1.001	1.00197	0.995427	0.985469	1.00581	1.00634	1.00211	1.00284	1.00027	1.00005	1.00076	0.996798	0.99711	0.99736
	0.6	1.00067	1.002	1.00981	1.00011	0.994622	1.00279	0.995894	0.998914	0.999338	0.995923	0.994132	0.996485	1.01801			0.6	1.00229	0.99929	1.00512	1.00424	1.00351	1.00019	1.00697	1.00021	1.00281	1.00281	1.0119	1.00063	1.00025	0.994676	0.999404			0.6	0.999808	0.995008	0.998945	0.992232	1.00242	1.00141	1.0009	1.00284	0.993574	1.00005	0.997474	0.994677	0.995303	0.998795
	0.7	1.00204	0.997332	1.00568	1.00235	0.993633	1.00744	0.999496	0.998914	1.00435	0.998504	0.998062	1.00331	1.01543			0.7	1.00204	0.996063	1.00512	1.00834	1.00661	0.999223	1.00401	1.00313	1.00465	1.00501	1.00827	1.00063	0.994498	0.994676	0.998377			0.7	1.00242	1.00197	0.997772	0.9903	1.00129	1.00634	1.00333	1.00846	0.997399	1.00346	0.997474	0.997858	0.998916	1.0031
	0.8	1.00166	0.992667	1.00568	1.00346	1.00352	1.00744	0.999496	0.993238	1.00335	0.998504	0.998062	0.999044	1.01543			0.8	1.00117	1.00359	1.00512	1.0026	1.00351	0.998252	0.99611	0.999243	1.00096	1.00281	1.00736	1.00063	0.999102	0.999756	0.99735			0.8	1.00209	0.99733	1.00129	0.993198	0.997896	1.00634	1.00454	1.00509	0.993574	1.00801	1.00239	0.996798	0.998013	0.998795
	0.9	1.00236	0.9936	1.00361	1.00235	1.00055	1.00744	0.996794	1.00216	1.00435	0.993343	1.0033	1.00928	1.01155			0.9	0.999917	0.996063	1.00512	1.00097	1.00455	0.995339	0.988213	0.998271	1.00004	1.00171	1.00736	1.00063	1.0014	0.997724	1.00146			0.9	1.00234	0.99733	0.995427	0.998995	1.00695	1.00552	1.00333	1.00396	0.991661	1.00346	0.997474	0.996798	1.00253	1.00453
	1	1.00144	0.9936	0.996386	1.0057	1.00154	1.00279	0.994994	1.00135	1.00736	0.997213	1.00068	1.00928	1.00638			1	1.0009	0.997139	1.00406	1.00179	1.00455	0.998252	1.00105	0.995358	0.997267	1.00062	1.00736	1.00163	1.00025	0.99874	1.00454			1	1.00259	0.996169	0.998945	0.995131	1.00016	1.00387	1.00697	1.00171	0.996443	1.00687	1.00404	0.994677	1.00614	1.00167
	1.1	1.00208	0.996399	0.999484	1.00458	0.994622	1.00837	1.0031	0.998914	1.00335	0.998504	1.0033	1.00672	1.00767			1.1	1.00077	0.997139	1.00406	1.00506	1.00145	1.00019	0.99611	1.00118	0.99819	1.00171	1.00463	1.00466	1.00025	0.996708	0.999404			1.1	1.00115	0.996169	0.997772	0.998029	1.00695	1.00469	1.00333	0.996083	0.992618	0.995495	0.997474	0.997858	0.999819	0.99736
	1.2	1.0005	0.995466	1.00155	1.0057	0.994622	1.00837	0.995894	0.996481	1.00235	0.998504	1.00461	0.999898	1.00251			1.2	0.998995	0.998214	0.995599	0.995233	1.00145	0.99631	0.998085	1.00118	0.999114	0.998418	1.00463	1.00466	0.997951	0.996708	0.998377			1.2	1.00265	0.999652	0.997772	0.995131	1.00016	1.00634	1.00211	1.00284	0.997399	1.00687	1.00239	1.0021	1.00163	0.998795
	1.3	1.0021	0.994533	1.00052	1.0057	1.00253	1.00837	1.0013	0.997292	1.00435	1.00237	1.00461	1.00502	0.998631			1.3	0.998189	0.99929	1.00406	0.996052	0.997313	0.997281	1.00105	0.9973	0.993573	0.995123	1.00009	1.00163	0.9968	0.996708	0.998377			1.3	1.00246	1.00197	1.00012	0.998995	1.00695	1.0129	1.00333	0.99946	0.992618	1.00687	1.00239	0.998918	1.00072	0.998795
	1.4	0.999686	0.991734	0.997419	1.00235	1.0055	1.00279	1.0031	1.00053	0.999338	0.995923	1.00199	0.995632	0.999922			1.4	0.998552	0.998214	0.996657	0.998509	0.99938	0.99631	0.997098	0.998271	0.997267	0.999517	1.00372	1.00063	0.999102	0.999756	0.995296			1.4	1.00288	0.998491	0.9966	0.997063	1.00581	1.00305	1.00454	1.00846	1.00409	1.00687	1.00568	1.0021	1.00433	1.00023
	1.5	1.00201	0.997332	1.00568	1.00235	1.00253	1.00465	0.999496	1.00135	1.00134	0.997213	1.00592	1.00502	1.00121			1.5	0.998606	0.997139	1.00089	0.996052	0.996279	0.999223	0.997098	0.996329	0.997267	1.00171	1.00372	1.00264	0.999102	0.996708	0.996323			1.5	1.00178	1.00081	0.9966	0.997063	1.00016	1.01044	1.00576	1.00059	0.998355	1.01142	1.00076	0.999979	1.00072	1.00023
	1.6	0.999869	0.998265	0.997419	0.997877	0.996599	1.00744	1.0004	1.00135	1.00535	0.995923	0.998062	1.00758	0.992171			1.6	0.999512	1.00359	1.003	0.996871	0.998346	0.997281	0.999072	0.994387	0.996343	0.999517	0.996457	1.00264	1.0014	1.00382	1.00043			1.6	1.00075	0.998491	0.997772	0.997063	0.995633	1.00552	1.00454	1.00396	1.00601	1.00005	1.00404	0.999979	1.00072	0.99736
	1.7	1.00128	1.00013	0.996386	0.997877	0.99561	1.00372	1.0013	1.00459	1.00736	1.00108	1.0033	1.00672	0.997339			1.7	1.00196	0.99929	1.00406	0.999328	1.00455	1.00117	1.00105	0.999243	0.999114	1.00171	1.00372	1.00566	0.999102	0.999756	1.00968			1.7	1.0026	1.00314	1.00129	1.00383	0.997896	1.00552	1.00211	1.00396	1.00505	1.00232	1.00239	0.998918	1.00163	1.00167
	1.8	1.00126	0.997332	0.993289	1.00123	0.998576	1.00837	1.0058	0.996481	1.00134	1.00237	1.00068	1.00587	1.0038			1.8	0.998948	0.997139	0.993483	0.996052	1.00145	1.00311	0.993149	0.999243	0.99819	1.00391	1.00827	0.997602	0.994498	0.997724	1.00146			1.8	1.00103	1.0043	1.00129	1.00189	1.00242	1.00634	1.00333	0.997209	0.999311	1.00118	1.00076	0.996798	1.00163	1.0031
	1.9	1.00189	1.00013	1.00671	0.997877	0.99561	1.00744	1.0103	1.00378	1.00535	0.998504	0.996752	1.00672	0.993463			1.9	0.999462	1.00037	0.999831	1.00097	1.00041	1.00505	1.00697	0.998271	0.996343	0.99732	0.997366	0.998609	0.997951	0.99874	0.994269			1.9	1.00185	0.999652	0.998945	0.996097	1.00129	1.00552	1.00333	0.99946	0.997399	1.00005	0.999114	1.0021	1.00704	1.00023
	2	1.00054	1.00293	1.00155	1.00011	0.991655	0.99814	1.0067	1.00378	1.00235	1.00108	0.996752	1.00672	0.994755			2	0.999512	1.00037	1.003	0.999328	0.99938	1.00117	0.994136	0.9973	0.999114	1.00171	1.00191	0.999617	0.997951	0.994676	1.00351			2	1.00068	1.00197	0.997772	0.995131	1.00355	1.00223	1.00211	1.00171	1.00314	0.99777	0.999114	0.999979	1.00253	0.998795
	2.1	1.00111	1.002	0.999484	1.00458	1.00154	1.00465	1.0067	0.997292	0.997334	0.998504	0.995442	1.00331	1.00251			2.1	1.0007	0.99929	1.00406	1.00179	0.998346	0.999223	0.998085	0.994387	1.00004	0.99732	1.00554	1.00264	1.00371	0.999756	1.00557			2.1	0.999828	1.00081	0.998945	0.998995	1.00468	1.00469	0.99847	0.997209	0.993574	0.99777	0.994192	1.00104	0.998916	0.994489
	2.2	1.00045	1.00106	1.00052	1.00346	1.00253	0.996279	1.0094	0.99567	0.996331	1.00366	0.992822	0.999898	1.0038			2.2	1.00158	0.998214	0.999831	1.00752	1.00765	1.00311	1.00302	0.999243	0.999114	0.99732	1.00282	0.999617	1.0014	0.996708	1.00659			2.2	0.99988	0.99733	0.9966	0.998995	1.00242	1.00962	0.997255	0.997209	0.990705	0.993219	0.994192	0.997858	1.00343	1.00167
	2.3	1.00126	1.00013	1.00361	1.00011	1.00747	0.997209	1.0049	1.00459	0.997334	1.00108	0.992822	1.00331	1.00251			2.3	1.0007	0.997139	0.997715	1.00506	1.00145	1.00602	1.00993	0.994387	0.99819	0.998418	0.999182	1.00063	1.00256	1.00077	0.998377			2.3	1.00152	1.0043	1.00012	0.999961	0.995633	1.00223	0.99847	0.996083	0.992618	1.00118	1.00239	1.00422	1.00704	1.00597
	2.4	0.999649	1.00106	0.999484	0.998994	1.00253	0.997209	1.004	1.00216	0.995329	1.00108	0.992822	0.999898	1.00121			2.4	1.0002	0.998214	1.003	1.00179	1.00041	1.00311	1.00697	0.995358	0.999114	0.995123	0.996457	0.997602	1.0014	1.00179	1.00249			2.4	1.00011	1.00197	1.00012	0.998995	1.00016	0.995666	0.99847	0.997209	0.996443	1.00005	1.00239	1.0021	1.00253	1.00023
	2.5	1.00077	1.00106	0.998451	1.00346	1.00451	0.996279	1.0031	0.999724	0.997334	0.999794	0.992822	1.00758	1.00509			2.5	1.00043	0.998214	0.996657	1.00506	1.00455	1.00796	1.00796	0.993416	0.99819	0.995123	0.994641	0.999617	1.00025	0.996708	1.00762			2.5	1.00089	0.999652	1.00129	0.996097	1.00016	0.998949	0.99847	0.991581	0.989749	0.994357	0.995833	1.00634	1.00163	1.00167
	2.6	0.999996	0.999198	0.998451	1.00458	0.997588	1.00558	1.0067	0.998914	0.998336	1.00108	0.987583	1.00331	0.998631			2.6	0.998197	0.996063	0.995599	1.00015	0.99938	0.998252	1.00302	0.996329	0.99542	0.996222	0.998274	1.00163	1.0014	0.997724	0.995296			2.6	0.998327	0.999652	0.998945	0.997063	0.991107	0.987458	0.993611	0.996083	0.99453	1.00118	0.994192	1.0021	0.99711	1.0031
	2.7	0.999987	0.996399	0.991224	1.00346	1.00451	0.997209	1.0049	1.00135	1.00235	0.997213	0.994132	1.00331	1.0038			2.7	1.00221	0.996063	1.00195	1.00588	1.00455	1.00893	0.998085	1.00507	1.00927	1.00391	1.00554	0.998609	0.997951	0.996708	0.998377			2.7	1.0004	1.00197	0.998945	1.00189	0.99337	0.996487	0.99847	0.99946	0.993574	1.00005	1.00404	1.0074	1.00163	1.00453
	2.8	0.999872	0.996399	0.996386	1.00235	1.00649	1	1.0058	1.00297	0.997334	0.994633	0.995442	1.00075	0.999922			2.8	1.00131	1.00252	1.00406	1.00424	1.00248	1.00311	0.99611	1.00313	1.00004	1.00171	1.001	0.998609	0.999102	1.00077	1.00146			2.8	1.00046	0.99733	1.00012	0.999961	1.00355	1.00469	1.0009	1.00509	0.998355	0.998908	1.00076	1.00528	1.00163	1.0031
	2.9	0.999228	1.0048	0.998451	0.998994	0.998576	1	1.004	1.00702	1.00235	0.993343	0.998062	1.00331	0.981836			2.9	1.00165	1.00144	1.00618	1.00424	0.998346	1.00893	0.99611	1.00118	1.00188	1.00171	0.999182	1.00365	0.997951	0.999756	1.00249			2.9	0.999698	0.995008	0.995427	1.00383	1.00581	1.00469	1.00211	0.996083	0.987836	1.0046	1.00568	1.00528	1.00253	0.998795
	3	0.998755	1.0048	0.994321	1.00123	1.00649	0.99907	1.0022	1.00135	1.00034	0.995923	0.998062	1.00075	0.980544			3	1.00245	1.00037	1.00089	1.00097	0.993179	1.00311	0.999072	1.00798	1.00742	1.00501	1.00372	1.00264	1.00256	1.00077	1.00659			3	1.00008	1.00546	0.9966	1.00093	1.00016	0.99977	0.997255	0.997209	0.999311	1.00005	1.00568	1.00316	0.998916	1.00167
	3.1	1.0007	1.00386	0.999484	0.995642	1.00154	0.992558	1.0013	1.00621	1.00636	1.00495	0.996752	1.00502	0.994755			3.1	1.00033	0.993912	1.00406	1.00015	0.99938	1.00408	0.998085	1.00118	1.00281	1.00171	1.00009	0.996594	1.00025	0.99874	1.00351			3.1	1.00177	1.00314	1.00598	1.00576	1.00016	0.998949	1.00211	0.99946	1.00505	0.998908	1.00568	1.00422	1.00072	1.0031
	3.2	0.999762	1.00293	0.994321	0.994525	1.00154	1	1.0049	1.00135	1.00335	0.999794	0.999371	1.0016	0.993463			3.2	1.00221	1.00037	0.999831	0.99769	1.00041	1.00311	1.01092	1.00992	1.00927	1.00281	1.00917	0.996594	0.9968	0.997724	0.996323			3.2	0.998846	1.00314	1.00012	1.00093	0.994501	0.991562	0.999684	0.998334	1.00601	1.00118	1.00404	1.00316	0.9944	0.998795
	3.3	0.999745	1.00666	0.996386	1.00123	1.01341	0.994419	1.0004	0.996481	0.993324	0.999794	0.995442	0.998191	1.00121			3.3	0.999506	0.998214	0.994541	0.99769	0.99938	1.00505	0.993149	1.00313	1.00004	1.00062	0.999182	0.999617	1.00025	1.00077	1.00146			3.3	0.999818	1.00314	1.00598	0.996097	1.00581	0.988279	0.997255	1.00171	1.00887	0.996632	0.997474	1.0021	0.999819	1.0031
	3.4	0.999107	1.00573	0.995354	0.994525	0.999565	0.994419	1.0013	1.00053	0.996331	0.997213	0.998062	1.00246	1.0038			3.4	1.00168	1.00467	0.999831	1.00179	0.995246	1.00796	1.00401	1.00118	1.00281	1.00171	0.999182	0.998609	1.00025	1.00077	1.00557			3.4	0.999478	1.00778	1.00246	0.999961	0.991107	0.990741	0.992396	0.99946	1.00696	1.00346	1.00404	1.00316	0.995303	1.00023
	3.5	0.999155	1.00106	0.992256	0.996759	1.00649	0.994419	0.994994	0.999724	1.00134	1.00237	0.999371	1.00502	0.996047			3.5	0.999973	0.99929	0.999831	1.00015	0.995246	0.999223	0.999072	1.00118	1.00004	1.00062	0.997366	0.997602	1.00371	1.00484	1.00146			3.5	0.998595	1.00778	1.00364	1.00479	1.00016	0.994024	0.99604	0.997209	1.00505	0.996632	1.00076	1.00316	0.998916	0.99736
	3.6	0.998745	1.00386	0.991224	0.997877	1.00253	0.992558	1.0022	1.00297	0.995329	1.00237	1.00068	1.00246	0.990879			3.6	1.0002	0.998214	0.995599	1.00097	0.998346	1.00214	0.999072	1.00604	0.999114	1.00062	0.996457	0.999617	1.00025	0.99874	1.00762			3.6	0.999302	0.999652	1.00129	1.00672	0.999027	0.997308	1.00454	1.00284	1.00792	0.993219	0.999114	1.0021	0.999819	1.00023
	3.7	0.998314	1.00106	1.00361	0.995642	1.00649	0.986047	0.990491	1.00621	0.999338	1.00237	1.00199	0.995632	0.990879			3.7	0.999045	0.997139	0.993483	0.996052	0.99938	1.00019	1.00302	1.0041	0.997267	1.00062	0.997366	0.998609	1.00025	1.00077	0.998377			3.7	0.999151	1.00546	1.00364	1.00383	0.996764	0.994845	0.999684	0.998334	1.00696	0.99777	1.00404	0.998918	0.99711	0.99736
	3.8	0.99787	0.999198	0.997419	1.00011	1.00154	0.990698	0.998595	1.00135	0.999338	0.999794	1.0033	0.992219	0.990879			3.8	0.998574	0.994987	0.990309	0.994414	0.991112	0.999223	0.994136	1.00507	1.00188	1.00171	0.994641	1.00063	1.00256	1.00585	1.00351			3.8	0.997882	1.00081	1.00598	1.00093	0.996764	0.994845	0.992396	0.99946	1.00983	0.995495	0.999114	0.999979	1.00072	1.00167
	3.9	0.99869	1.00106	1.00155	0.998994	1.00154	0.993488	0.998595	1.00135	0.997334	1.00366	0.996752	0.996485	0.993463			3.9	0.998139	0.99929	0.992425	0.99769	0.996279	0.99631	0.994136	1.00507	1.00004	1.00171	0.989191	1.00163	0.997951	1.00179	1.00043			3.9	0.99862	0.999652	1.00364	1.00576	0.99337	0.996487	0.99847	0.993832	1.00983	0.993219	1.00239	0.998918	1.00524	0.998795
	4	1.00052	1.00013	1.00568	0.998994	1.00253	0.995349	1.0004	0.999724	0.998336	1.00624	1.00723	0.998191	0.993463			4	0.998885	1.00359	0.994541	0.996052	0.993179	0.998252	1.00105	1.00216	0.997267	1.00391	0.994641	1.00063	0.997951	1.0028	0.998377			4	0.999049	1.00314	1.00598	1.01349	1.00016	0.995666	0.997255	0.991581	1.00601	0.996632	0.999114	1.0021	1.00433	1.00023
	4.1	0.999498	1.0048	1.00361	0.998994	0.998576	0.995349	1.0013	1.00053	0.997334	1.00366	1.0033	0.995632	0.990879			4.1	1.00026	1.00037	0.997715	0.99769	0.995246	0.995339	1.005	1.00507	1.00004	1.00501	0.993732	0.998609	1.00256	1.00484	1.00249			4.1	0.999305	1.00081	1.00481	1.00866	1.00129	0.996487	0.997255	0.996083	1.01079	1.00005	0.995833	0.999979	1.00253	1.00453
	4.2	0.998913	1.0048	1.00258	1.00011	1.00451	0.99907	0.996794	0.992427	0.992322	1.00237	1.00068	0.991366	0.999922			4.2	0.999275	1.00682	1.00195	0.996052	0.996279	0.99631	0.999072	1.00021	1.00004	0.998418	0.991916	1.00365	0.997951	1.0028	0.998377			4.2	0.999183	0.999652	1.00246	1.01252	0.999027	0.995666	0.99604	0.991581	1.00314	1.00346	0.997474	0.996798	0.996207	0.998795
	4.3	0.998476	0.999198	0.996386	1.00346	1.0055	0.993488	0.993193	0.996481	0.995329	1.00237	1.00592	0.995632	0.994755			4.3	0.998026	1.00467	1.00195	0.991956	0.996279	0.991455	0.99611	0.999243	1.00188	1.00062	0.989191	0.998609	1.00025	1.0028	0.99735			4.3	0.999362	0.99733	1.00598	1.01155	1.00129	0.998949	0.99847	0.996083	0.999311	1.00232	0.990911	0.997858	0.998916	0.99736
	4.4	0.998366	1.00759	1.00258	0.994525	0.991655	0.99814	0.994994	1.00053	0.994327	1.00108	1.0033	0.998191	0.993463			4.4	0.998251	1.00252	0.993483	0.995233	0.997313	0.992426	1.00401	0.9973	0.994497	1.00062	0.993732	0.997602	1.00256	1.00585	0.998377			4.4	0.998996	0.999652	1.00364	1.00769	1.00921	1.00305	1.00211	0.998334	1.00314	0.998908	0.997474	1.00422	0.992594	0.995924
	4.5	0.998574	1.00293	0.995354	1.00123	0.994622	0.99814	0.996794	0.999724	0.999338	1.00237	1.00068	0.993072	0.998631			4.5	0.998883	1.00574	0.999831	0.999328	1.00145	0.99631	1.00203	1.00118	0.99542	0.998418	0.986466	0.995586	1.0014	1.00179	0.999404			4.5	0.997776	1.00197	1.00832	1.01059	0.994501	1.00223	1.00211	0.996083	1.00601	0.998908	0.990911	1.00104	0.99711	0.995924
	4.6	0.998678	1.00293	1.00052	0.998994	0.997588	0.995349	0.994994	0.998914	0.998336	0.998504	1.00592	0.997338	0.994755			4.6	0.997726	1.00037	0.992425	0.994414	0.997313	0.99631	1.00203	1.00216	1.00096	0.999517	0.991916	0.996594	0.999102	0.99874	0.996323			4.6	0.998127	1.00081	1.00598	1.00672	1.00016	1.00305	1.0009	0.993832	1.00218	0.990944	0.997474	0.999979	0.999819	0.99736
	4.7	0.998305	0.999198	0.996386	1.00123	1.00154	0.996279	0.993193	0.998103	0.993324	0.999794	1.00723	0.997338	0.996047			4.7	0.997894	1.00252	0.996657	0.996052	0.997313	0.998252	0.995123	1.00021	0.999114	0.998418	0.991916	0.995586	1.00025	1.00484	0.994269			4.7	0.995944	0.996169	1.00012	1.00672	0.987713	0.993204	0.99604	0.99946	1.00314	0.998908	1.00076	0.999979	0.99711	0.99736
	4.8	0.997826	0.999198	0.998451	0.998994	1.00649	0.993488	0.989591	0.999724	0.998336	1.00366	1.0033	0.990513	0.992171			4.8	0.997035	0.99929	0.995599	0.996052	0.996279	0.992426	0.998085	0.996329	0.996343	0.995123	0.991007	0.997602	0.999102	1.00585	0.999404			4.8	0.995366	0.996169	0.998945	0.994164	0.996764	0.992383	0.99847	0.996083	1.00409	0.994357	1.00239	0.996798	0.993497	0.991619
	4.9	0.995679	0.995466	0.996386	0.990055	0.99561	0.995349	0.995894	0.997292	0.993324	1.00237	1.0033	0.992219	0.990879			4.9	0.996302	1.00144	0.997715	0.987861	0.994212	0.994368	0.99611	0.998271	0.994497	0.994025	0.987374	0.996594	1.00256	1.00585	0.99735			4.9	0.994699	0.992685	0.993082	0.998029	1.00355	0.995666	0.997255	1.00396	0.997399	0.995495	0.995833	0.998918	0.99711	0.99736
	5	0.996677	0.995466	0.996386	0.98782	0.989678	1.00093	1.0022	0.999724	0.994327	1.00624	1.00854	0.990513	0.988295			5	0.999272	1.01112	1.00195	0.996052	0.995246	0.995339	1.00796	0.9973	0.997267	0.994025	0.991007	0.992563	1.00371	1.00585	1.00043			5	0.991987	0.995008	0.994255	0.997063	0.989976	0.989099	0.986323	1.01184	0.999311	0.994357	1.00076	0.991495	0.995303	0.998795
	5.1	0.995101	0.994533	0.996386	0.986702	0.987701	0.992558	0.994994	0.999724	0.996331	1.01011	1.00592	0.987953	0.988295			5.1	0.993424	0.998214	0.987134	0.987861	0.988012	0.990484	0.99611	0.999243	0.999114	0.996222	0.985557	0.996594	0.994498	0.999756	0.989133			5.1	0.994655	0.991524	0.990737	1.00189	0.991107	0.981712	0.982679	1.01634	0.999311	1.00232	1.00568	0.992556	0.996207	0.994489
	5.2	0.99584	0.992667	0.996386	0.991172	0.992644	0.992558	0.997695	1.00135	0.996331	1.00624	1.00723	0.988807	0.987004			5.2	0.996664	0.996063	0.987134	0.996052	0.996279	0.997281	0.999072	1.00313	1.00004	0.999517	0.991007	0.993571	0.999102	0.999756	0.995296			5.2	0.993258	0.99733	0.9966	1.00576	0.994501	0.982533	0.983893	1.00284	0.987836	0.998908	1.00239	0.988314	0.996207	0.994489
	5.3	0.998727	0.999198	0.999484	0.99229	0.99561	1	1.0031	1.00216	1.00235	1.00753	1.00461	0.988807	0.989587			5.3	0.996748	0.992836	0.986076	0.996052	0.994212	0.997281	1.00006	1.00507	1.00096	1.00062	0.993732	0.996594	0.997951	0.996708	0.996323			5.3	0.997268	0.999652	1.00129	1.00672	0.999027	0.984995	0.986323	1.01297	1.00122	1.00915	1.01716	0.997858	0.998916	1.00167
	5.4	0.997143	0.995466	0.992256	0.990055	0.990667	0.991628	1.0022	1.00378	1.00435	1.0114	1.00854	0.98966	0.985712			5.4	0.99792	0.99929	0.987134	0.998509	0.993179	0.999223	1.00006	1.00701	1.0065	1.00281	0.994641	0.992563	0.997951	0.996708	0.995296			5.4	0.995648	0.999652	1.00364	1.00093	0.989976	0.979249	0.985108	1.01297	1.00505	1.01029	1.00896	0.998918	1.00072	1.00023
	5.5	0.99934	1.00013	1.00465	0.99229	1.00154	0.995349	0.999496	1.0054	0.998336	1.01011	1.01116	0.993072	0.980544			5.5	0.997002	0.994987	0.987134	0.993594	0.993179	1.00214	0.997098	1.00604	1.00465	1.00171	0.992824	0.993571	0.999102	0.997724	0.994269			5.5	0.997964	1.00546	1.00598	1.01639	0.988844	0.978429	0.985108	1.01072	1.00409	1.00687	1.00732	0.999979	0.998916	1.0031
	5.6	1.00293	1.002	1.00052	0.996759	1.00451	1.00837	1.0103	1.00864	0.999338	1.01398	1.01116	0.996485	0.983128			5.6	0.99902	0.997139	0.986076	0.999328	0.991112	1.00214	0.995123	1.00895	1.00465	1.00611	0.998274	0.992563	1.00256	0.99874	1.00351			5.6	0.998976	1.00546	1.00481	1.01832	0.989976	0.984174	0.985108	1.00959	1.00122	1.00573	1.01224	0.998918	1.00163	1.00167
	5.7	1.00424	1.0048	1.00465	0.995642	1.00352	1.00372	1.0085	1.01189	1.00435	1.0114	1.01509	1.0016	0.985712			5.7	0.998434	0.997139	0.986076	1.00097	0.991112	0.998252	0.998085	1.00895	1.00188	0.999517	0.996457	0.994579	1.00486	0.99874	1.00146			5.7	1.00165	1.00314	1.00364	1.02122	0.999027	0.990741	0.999684	1.01184	1.00983	1.00801	1.00404	1.00422	1.00795	0.998795
	5.8	1.00703	1.01226	1.00671	1.00123	1.00055	1.01302	1.0112	1.0127	1.00636	1.01398	1.01771	1.00416	0.98442			5.8	0.997745	0.992836	0.985018	0.999328	0.993179	0.995339	1.005	1.00313	1.00004	1.00062	0.994641	0.997602	1.00256	0.999756	0.999404			5.8	1.00309	1.00197	1.01067	1.02412	0.995633	0.98992	0.997255	1.02085	1.01652	1.0137	1.00896	1.00846	1.01337	0.99736
	5.9	1.01014	1.01879	1.01291	1.00235	1.00945	1.01767	1.02201	1.01189	1.00636	1.0114	1.01378	1.00416	0.990879			5.9	1.00101	0.99176	0.986076	1.00588	0.997313	1.00505	1.00302	1.00992	1.00373	1.00281	1.00009	0.996594	1.00256	1.0028	1.00659			5.9	1.00385	1.00778	1.01301	1.02895	0.992239	0.989099	0.999684	1.02085	1.01939	1.01256	1.00732	1.0127	1.01608	1.00023
	6	1.0124	1.02346	1.01394	1.00682	1.01044	1.01209	1.02201	1.01351	1.01036	1.01527	1.01902	1.00843	0.993463			6	1.00426	1.00144	0.987134	1.00015	1.00041	1.00602	1.00006	1.01672	1.00927	1.0127	1.00736	0.995586	1.00831	1.00687	1.00762			6	1.00736	1.0101	1.02005	1.04151	0.992239	0.998129	1.0009	1.01972	1.01652	1.02052	1.00896	1.0127	1.02601	1.00453
	6.1	1.01548	1.02439	1.01704	1.00346	1.01538	1.02419	1.02831	1.01999	1.01638	1.01011	1.01771	1.01014	0.998631			6.1	1.00336	0.998214	0.986076	1.00506	1.00351	1.01185	1.00302	1.0109	1.00188	1.0083	1.00191	0.996594	1.00831	1.00382	1.00762			6.1	1.01135	1.01591	1.02357	1.04247	1.00468	0.99977	1.00211	1.0231	1.02609	1.02963	1.01552	1.01695	1.03053	1.00597
	6.2	1.01873	1.02812	1.01394	1.00793	1.02329	1.02698	1.03101	1.02243	1.02139	1.01398	1.02426	1.00758	1.0038			6.2	1.00256	1.00037	0.991367	1.00015	0.995246	1.01088	1.00302	1.01187	1.0065	1.0083	0.999182	0.998609	1.00716	1.00077	1.00249			6.2	1.0115	1.01707	1.02708	1.04537	1.00242	1.00552	1.00211	1.02535	1.03374	1.02052	1.0106	1.02119	1.02782	1.00167
	6.3	1.02147	1.02812	1.02117	1.01129	1.02527	1.02977	1.03011	1.03135	1.02139	1.01656	1.03081	1.00928	1.00251			6.3	1.00555	1.00144	0.991367	1.00998	0.998346	1.00991	1.00993	1.01478	1.00742	1.0127	1.00554	0.996594	1.00831	1.0028	1.00865			6.3	1.01338	1.01939	1.02708	1.0502	1.00581	1.00469	1.00454	1.0276	1.03087	1.0228	1.0106	1.02013	1.02782	1.00453
	6.4	1.02229	1.03558	1.016	1.01352	1.03615	1.0307	1.03731	1.02972	1.01638	1.01785	1.02295	1.00758	1.0038			6.4	1.0055	1.00037	0.992425	1.00588	0.99938	1.01573	1.01684	1.01187	1.00927	1.0105	1.00009	0.993571	1.01061	1.00484	1.00557			6.4	1.01666	1.02752	1.03295	1.06276	1.01034	1.01455	1.01426	1.02872	1.03565	1.02507	1.01224	1.02331	1.03324	1.00453
	6.5	1.02735	1.04211	1.02943	1.01799	1.03812	1.03535	1.04632	1.03459	1.02139	1.02172	1.02426	1.01184	1.00509			6.5	1.00737	1.00467	0.996657	1.00752	1.00041	1.01185	1.01289	1.01769	1.01389	1.01489	1.00645	0.999617	1.00831	1.0028	1.00557			6.5	1.01882	1.02984	1.03295	1.06566	1.01034	1.01208	1.01305	1.02985	1.03852	1.02735	1.01388	1.03285	1.04046	1.01028
	6.6	1.02897	1.04305	1.02736	1.02246	1.03812	1.03814	1.03912	1.04026	1.02941	1.02302	1.02164	1.01867	1.00638			6.6	1.01022	1.00467	0.999831	1.01161	1.00455	1.01282	1.00401	1.02158	1.01481	1.01709	1.01553	0.996594	1.01637	1.01195	1.01173			6.6	1.02031	1.03332	1.03646	1.06566	1.00808	1.01619	1.0179	1.0321	1.04999	1.0228	1.01388	1.03285	1.03595	1.00453
	6.7	1.03293	1.04864	1.02633	1.0247	1.04505	1.04558	1.04812	1.04513	1.02841	1.0256	1.02819	1.01781	1.01155			6.7	1.00965	1.00467	0.997715	1.01325	1.00248	1.01767	1.01289	1.01769	1.01481	1.01599	1.01008	0.999617	1.01061	1.00585	1.01173			6.7	1.02281	1.0368	1.03881	1.06469	1.01487	1.02357	1.02276	1.04223	1.05382	1.02849	1.0106	1.03285	1.03685	1.00741
	6.8	1.03463	1.05144	1.03252	1.02581	1.04801	1.05116	1.04992	1.04837	1.03041	1.02302	1.02426	1.01781	1.01284			6.8	1.00942	1.00359	0.995599	1.01817	1.00558	1.01573	1.01585	1.01575	1.01389	1.0127	1.001	0.999617	1.01176	1.01093	1.01173			6.8	1.0231	1.0368	1.04115	1.06566	1.01487	1.02193	1.01669	1.03998	1.05095	1.02735	1.00896	1.03709	1.03504	1.01601
	6.9	1.03565	1.05797	1.03769	1.0314	1.04801	1.04558	1.04992	1.0508	1.03141	1.02172	1.02688	1.01611	1.01026			6.9	1.0125	1.00897	0.998773	1.01653	1.00661	1.01573	1.00796	1.02255	1.01943	1.01819	1.00917	1.00163	1.01752	1.01398	1.01789			6.9	1.02381	1.03797	1.03764	1.08015	1.00808	1.02111	1.01669	1.0366	1.04904	1.02963	1.01224	1.03709	1.03504	1.01458
	7	1.03786	1.05797	1.03459	1.03699	1.05592	1.05302	1.04992	1.05243	1.03041	1.02431	1.02426	1.01525	1.0193			7	1.01267	1.00897	0.995599	1.02226	1.00765	1.01864	1.01191	1.02255	1.01574	1.01819	1.01099	0.999617	1.01752	1.01093	1.01687			7	1.02529	1.04725	1.04467	1.06952	1.01147	1.02768	1.0179	1.0411	1.0586	1.02849	1.01388	1.03179	1.03866	1.01458
	7.1	1.03969	1.05797	1.04182	1.03811	1.05493	1.04744	1.04902	1.05972	1.03342	1.0256	1.02688	1.01952	1.02188			7.1	1.0146	1.00897	0.996657	1.01981	1.00971	1.02447	1.01684	1.02546	1.01943	1.01929	1.01553	1.00063	1.01982	1.01296	1.01481			7.1	1.02638	1.03797	1.03998	1.07532	1.01487	1.02522	1.01547	1.03773	1.05573	1.02849	1.02372	1.02967	1.03595	1.01601
	7.2	1.04069	1.06264	1.04182	1.04369	1.05889	1.05209	1.05172	1.05648	1.03342	1.02043	1.0295	1.01184	1.02576			7.2	1.0145	1.01005	0.994541	1.02718	1.00971	1.02447	1.01487	1.02352	1.01758	1.01489	1.0119	1.00365	1.01982	1.01398	1.01687			7.2	1.02599	1.04261	1.03764	1.07532	1.01374	1.03178	1.0179	1.0366	1.05382	1.03418	1.0188	1.02861	1.03414	1.01314
	7.3	1.04125	1.06451	1.04079	1.04146	1.05295	1.05209	1.04722	1.06297	1.03342	1.02818	1.03081	1.01611	1.02447			7.3	1.01656	1.01112	0.997715	1.02226	1.01488	1.02156	1.01783	1.02449	1.02127	1.02258	1.0119	1.00163	1.02558	1.01601	1.02303			7.3	1.02592	1.04029	1.04584	1.07146	1.0126	1.02768	1.02033	1.0411	1.05764	1.03076	1.01552	1.03179	1.03775	1.01745
	7.4	1.04096	1.06171	1.04388	1.04481	1.04801	1.04837	1.04992	1.05729	1.03242	1.02689	1.03212	1.01781	1.02834			7.4	1.01663	1.01327	0.998773	1.02636	1.01178	1.0235	1.0198	1.02546	1.0185	1.02039	1.01735	1.00063	1.02212	1.015	1.01995			7.4	1.02838	1.04493	1.0435	1.07532	1.01826	1.03178	1.01669	1.0411	1.05382	1.02963	1.02372	1.02755	1.03956	1.01458
	7.5	1.04205	1.06171	1.04595	1.04593	1.04801	1.04837	1.05442	1.05972	1.03141	1.02431	1.03212	1.01781	1.0348			7.5	1.01926	1.01005	0.992425	1.02882	1.01488	1.03321	1.02375	1.03323	1.02312	1.02258	1.01735	1.00466	1.02558	1.01906	1.02097			7.5	1.03051	1.04725	1.04584	1.07919	1.02392	1.03589	1.02276	1.04448	1.06147	1.0319	1.02208	1.02861	1.03956	1.01028
	7.6	1.04479	1.05704	1.04905	1.05151	1.05691	1.05302	1.05352	1.06135	1.03141	1.02689	1.03474	1.02208	1.03997			7.6	1.01869	1.0165	0.998773	1.028	1.01385	1.02738	1.02573	1.02546	1.02035	1.02039	1.01372	1.00264	1.02673	1.02008	1.022			7.6	1.02878	1.04145	1.04115	1.07339	1.02052	1.03507	1.02155	1.04786	1.05286	1.0319	1.01716	1.03073	1.03956	1.01314
	7.7	1.04451	1.05797	1.05008	1.0504	1.05098	1.05116	1.05172	1.06621	1.03141	1.02689	1.03736	1.01867	1.04126			7.7	1.01964	1.01005	0.996657	1.028	1.02005	1.02835	1.02573	1.02546	1.02127	1.02258	1.01372	1.00466	1.03018	1.02211	1.02611			7.7	1.02545	1.0368	1.03177	1.06759	1.01487	1.03014	1.01547	1.04786	1.05382	1.0319	1.0188	1.02649	1.03775	1.01171
	7.8	1.04615	1.05984	1.05421	1.05263	1.04999	1.05488	1.05442	1.06945	1.03542	1.03076	1.04129	1.01355	1.03739			7.8	1.02178	1.02403	1.00195	1.02882	1.02005	1.02933	1.02573	1.02935	1.0222	1.02588	1.01917	1.00768	1.02558	1.02008	1.02508			7.8	1.02907	1.0368	1.03529	1.07339	1.02505	1.03753	1.01669	1.05349	1.05286	1.03531	1.0188	1.03073	1.03775	1.01601
	7.9	1.04458	1.05797	1.05214	1.05487	1.0401	1.0493	1.05082	1.06621	1.03542	1.02947	1.03736	1.01611	1.04514			7.9	1.02155	1.01543	0.997715	1.03209	1.02005	1.03224	1.0198	1.03323	1.02866	1.02917	1.02007	1.00365	1.02442	1.02008	1.02508			7.9	1.02924	1.03913	1.03881	1.06856	1.01713	1.0326	1.01183	1.05799	1.06051	1.03076	1.01716	1.03285	1.03956	1.01745
	8	1.04615	1.06077	1.05111	1.05487	1.04505	1.05209	1.05442	1.06783	1.03542	1.03462	1.03212	1.02293	1.04255			8	1.02121	1.0165	1.003	1.02964	1.02108	1.02641	1.01092	1.03226	1.02774	1.02807	1.02189	1.00466	1.02558	1.02414	1.02508			8	1.02998	1.04261	1.03646	1.07532	1.01939	1.03178	1.01305	1.05686	1.05573	1.02963	1.01552	1.03709	1.03775	1.01028
	8.1	1.04587	1.06077	1.04698	1.05263	1.05098	1.05302	1.04902	1.06864	1.03743	1.03333	1.03343	1.02293	1.04126			8.1	1.02184	1.01758	1.00089	1.028	1.02005	1.02933	1.02276	1.03129	1.02312	1.02807	1.02007	1.00566	1.02558	1.02312	1.03022			8.1	1.03196	1.04609	1.04115	1.07339	1.02957	1.03342	1.01305	1.06474	1.0586	1.02735	1.01552	1.03285	1.03504	1.01314
	8.2	1.04597	1.05891	1.05421	1.05263	1.04109	1.05395	1.05172	1.06621	1.04144	1.03462	1.03736	1.01696	1.04255			8.2	1.02266	1.01973	1.00406	1.03291	1.02108	1.02544	1.0198	1.02935	1.02497	1.02698	1.01917	1.00264	1.03363	1.02719	1.03022			8.2	1.03376	1.04493	1.04115	1.07532	1.02618	1.03835	1.01669	1.06249	1.05191	1.03418	1.01388	1.03921	1.03866	1.01601
	8.3	1.04591	1.06171	1.05627	1.05151	1.04406	1.05581	1.05532	1.06459	1.03743	1.02818	1.03736	1.01867	1.03997			8.3	1.02159	1.0165	1.00512	1.03373	1.02418	1.0303	1.01092	1.03032	1.02682	1.02368	1.01917	1.00566	1.02558	1.02414	1.02611			8.3	1.03262	1.05074	1.03998	1.07242	1.03184	1.04163	1.01912	1.05911	1.04617	1.03418	1.01552	1.03391	1.03956	1.01458
	8.4	1.04544	1.05797	1.05008	1.05151	1.04109	1.05861	1.05442	1.07107	1.03943	1.0256	1.03474	1.01696	1.04385			8.4	1.02599	1.02188	1.003	1.03127	1.02522	1.02933	1.03461	1.03614	1.03051	1.03027	1.02189	1.00768	1.03363	1.02617	1.03227			8.4	1.03405	1.05306	1.03295	1.07725	1.03297	1.03671	1.02155	1.05799	1.05095	1.02849	1.01716	1.03497	1.04679	1.01889
	8.5	1.04429	1.05517	1.05524	1.05822	1.04208	1.05302	1.04992	1.06864	1.03843	1.02302	1.03212	1.01696	1.03868			8.5	1.02574	1.02296	0.999831	1.03865	1.02212	1.02447	1.02573	1.03614	1.02774	1.03027	1.01826	1.00869	1.03478	1.03024	1.04049			8.5	1.03133	1.05074	1.03295	1.07532	1.02957	1.0285	1.01426	1.05799	1.05286	1.02849	1.0106	1.03285	1.03595	1.01314
	8.6	1.04277	1.05238	1.05627	1.0504	1.0312	1.05674	1.05082	1.0654	1.04144	1.02818	1.03081	1.01355	1.03609			8.6	1.02754	1.02188	1.00724	1.03701	1.02522	1.03127	1.02869	1.03517	1.02959	1.03137	1.0228	1.0107	1.03594	1.03125	1.03741			8.6	1.0308	1.05538	1.03295	1.07435	1.02844	1.03014	1.01426	1.05574	1.04521	1.0319	1.01552	1.03179	1.03956	1.01171
	8.7	1.04295	1.05424	1.05421	1.05487	1.0401	1.05395	1.04812	1.06945	1.04043	1.02818	1.02819	1.01525	1.02834			8.7	1.02692	1.02188	1.00406	1.03701	1.03038	1.0303	1.02968	1.03517	1.03236	1.03357	1.02371	1.00264	1.03363	1.02922	1.0333			8.7	1.03183	1.0577	1.03529	1.07532	1.02279	1.02768	1.01669	1.05349	1.04426	1.0319	1.01388	1.03285	1.03956	1.01314
	8.8	1.04379	1.06264	1.05937	1.0504	1.03812	1.05767	1.04632	1.0727	1.04344	1.02689	1.0295	1.01269	1.02576			8.8	1.02931	1.02403	1.00724	1.03701	1.02728	1.03224	1.03363	1.03809	1.03328	1.03576	1.02007	1.00365	1.03709	1.03735	1.04357			8.8	1.03195	1.04842	1.03177	1.07725	1.03297	1.02604	1.0179	1.05461	1.05095	1.02394	1.0106	1.03815	1.04046	1.00741
	8.9	1.04356	1.05984	1.05421	1.05375	1.04505	1.05953	1.04812	1.0727	1.03943	1.02431	1.02688	1.0144	1.02447			8.9	1.02954	1.02403	1.00935	1.04028	1.02625	1.03904	1.02671	1.03809	1.0342	1.03796	1.02734	1.00768	1.03709	1.03125	1.03433			8.9	1.03131	1.04725	1.02943	1.07242	1.02392	1.02275	1.0179	1.04673	1.04234	1.02963	1.02044	1.03179	1.03956	1.00741
	9	1.04452	1.06451	1.0573	1.05487	1.04307	1.05581	1.04542	1.07513	1.03943	1.02172	1.03212	1.01525	1.02964			9	1.03	1.02511	1.01041	1.03783	1.02522	1.03224	1.03165	1.03906	1.04067	1.03796	1.02553	1.00667	1.03594	1.0343	1.03741			9	1.03143	1.04958	1.02708	1.07629	1.02165	1.02768	1.01669	1.04673	1.0433	1.02849	1.01716	1.03921	1.04137	1.01458
	9.1	1.04418	1.06077	1.05524	1.05375	1.03812	1.05767	1.04362	1.08243	1.04244	1.02172	1.02819	1.01525	1.03093			9.1	1.02856	1.02403	1.00406	1.0411	1.02522	1.03224	1.02968	1.03614	1.0379	1.02807	1.02098	1.0107	1.03594	1.03532	1.03843			9.1	1.03187	1.04609	1.03529	1.07146	1.02392	1.03425	1.01547	1.05236	1.04808	1.0319	1.01552	1.02967	1.03866	1.01028
	9.2	1.0437	1.05704	1.05834	1.05263	1.0401	1.05767	1.04902	1.07432	1.04344	1.02302	1.03081	1.01099	1.02705			9.2	1.02914	1.01973	1.00829	1.04602	1.02522	1.03418	1.01487	1.04294	1.04067	1.03796	1.02553	1.00667	1.03824	1.03329	1.03433			9.2	1.03249	1.04377	1.03529	1.06952	1.016	1.03096	1.01669	1.04898	1.04521	1.02394	1.0106	1.03285	1.04588	1.01314
	9.3	1.04394	1.05611	1.05524	1.05375	1.04307	1.05861	1.04632	1.07756	1.04745	1.02431	1.0295	1.01355	1.02188			9.3	1.03135	1.03156	1.01464	1.04766	1.03038	1.03418	1.02276	1.03809	1.0379	1.03357	1.02643	1.00869	1.03824	1.03227	1.04254			9.3	1.03238	1.04493	1.03529	1.06856	1.01826	1.0326	1.01669	1.05236	1.04999	1.02735	1.0106	1.03391	1.04679	1.01028
	9.4	1.04437	1.05891	1.05627	1.05375	1.04307	1.05953	1.05352	1.0727	1.04144	1.02172	1.03212	1.00843	1.03093			9.4	1.02804	1.02296	1.00406	1.04356	1.02625	1.02738	1.02178	1.03712	1.0379	1.03137	1.02643	1.00768	1.03939	1.02719	1.03946			9.4	1.03422	1.04145	1.03646	1.07532	1.03184	1.03342	1.0179	1.05686	1.05573	1.0319	1.0106	1.03285	1.04769	1.00597
	9.5	1.04418	1.05611	1.0604	1.0504	1.04208	1.05767	1.05172	1.07107	1.04444	1.03076	1.03081	1.00502	1.02964			9.5	1.03058	1.0208	1.00935	1.05421	1.02935	1.03224	1.02474	1.041	1.03882	1.03247	1.02462	1.0107	1.03709	1.03227	1.04049			9.5	1.03329	1.03564	1.03295	1.07049	1.02618	1.03178	1.01305	1.05574	1.04808	1.02849	1.0106	1.03179	1.04949	1.01314
	9.6	1.04416	1.04958	1.05524	1.05151	1.04801	1.05953	1.05262	1.07351	1.04845	1.02302	1.03212	1.00928	1.02705			9.6	1.02988	1.02403	1.01147	1.05011	1.03142	1.0303	1.02178	1.03906	1.03974	1.03466	1.02462	1.00768	1.03478	1.03227	1.03638			9.6	1.03361	1.0368	1.03764	1.07242	1.02392	1.03014	1.01669	1.05461	1.04521	1.03076	1.01716	1.03285	1.04679	1.01028
	9.7	1.04417	1.04958	1.0635	1.05263	1.04505	1.05767	1.05172	1.07351	1.05046	1.02302	1.03474	1.00502	1.02318			9.7	1.02916	1.02296	1.00724	1.04848	1.02728	1.02933	1.02671	1.03906	1.04067	1.03357	1.02371	1.00869	1.03709	1.03024	1.0333			9.7	1.03279	1.03564	1.03881	1.06856	1.02165	1.02522	1.01669	1.05349	1.04713	1.03076	1.01224	1.03179	1.03956	1.00741
	9.8	1.0441	1.05704	1.05834	1.05151	1.04505	1.05674	1.05532	1.07189	1.04745	1.02172	1.03212	1.00758	1.02447			9.8	1.03318	1.03264	1.0157	1.0493	1.03245	1.0371	1.03165	1.04391	1.04251	1.03796	1.02916	1.00969	1.03594	1.0343	1.03227			9.8	1.03382	1.04377	1.03881	1.07049	1.02731	1.03178	1.02155	1.06136	1.04713	1.02963	1.01388	1.03179	1.03685	1.00597
	9.9	1.04444	1.05331	1.05421	1.0504	1.049	1.05581	1.05172	1.07026	1.04545	1.02302	1.03343	1.00672	1.03997			9.9	1.03117	1.02403	1.00829	1.05093	1.03348	1.03515	1.02573	1.03809	1.04159	1.03796	1.02643	1.00667	1.03939	1.03227	1.03638			9.9	1.03367	1.04493	1.03764	1.06083	1.03184	1.02439	1.0179	1.05123	1.0433	1.02621	1.01552	1.03391	1.04046	1.01028
	10	1.04319	1.05238	1.05834	1.04704	1.04307	1.05209	1.05172	1.06702	1.04444	1.01914	1.03081	1.00843	1.04385			10	1.03168	1.02618	1.01041	1.05093	1.03348	1.04001	1.02375	1.04197	1.04251	1.03686	1.02825	1.00768	1.03478	1.02922	1.03741			10	1.03341	1.04725	1.03529	1.06856	1.02844	1.02932	1.0179	1.04336	1.04521	1.03304	1.01552	1.03815	1.03595	1.00884
	10.1	1.0445	1.05144	1.05421	1.05263	1.04208	1.05674	1.05352	1.07107	1.05146	1.02172	1.03081	1.01355	1.0348			10.1	1.03117	1.02726	1.01358	1.04274	1.02935	1.02835	1.02178	1.041	1.04159	1.03796	1.02553	1.01171	1.04169	1.03329	1.04049			10.1	1.03262	1.04725	1.03881	1.0618	1.03071	1.03342	1.01912	1.04786	1.04426	1.03076	1.01224	1.03285	1.03414	1.00453
	10.2	1.04153	1.05238	1.05421	1.05375	1.03812	1.05209	1.04902	1.06783	1.04745	1.01785	1.03605	0.997338	1.03222			10.2	1.03029	1.02726	1.01253	1.04438	1.02935	1.0303	1.02079	1.04003	1.03605	1.03137	1.02825	1.01171	1.03939	1.03532	1.03741			10.2	1.03269	1.04609	1.03177	1.06083	1.03297	1.02686	1.0179	1.05236	1.04904	1.02621	1.00404	1.02967	1.03866	1.01171
	10.3	1.0389	1.04585	1.05214	1.05151	1.0401	1.05116	1.04812	1.06297	1.05046	1.0114	1.03212	0.996485	1.02447			10.3	1.03083	1.02726	1.01464	1.04438	1.02935	1.02933	1.01289	1.04391	1.04344	1.03357	1.03097	1.00969	1.03939	1.03532	1.03741			10.3	1.03284	1.04377	1.0306	1.06856	1.02505	1.02522	1.01062	1.05123	1.04521	1.03304	1.00732	1.03179	1.03775	1.01028
	10.4	1.04294	1.04771	1.05627	1.05487	1.04801	1.05395	1.04902	1.07026	1.04845	1.01398	1.03212	1.00843	1.03222			10.4	1.03187	1.02403	1.01358	1.05093	1.03142	1.0371	1.02573	1.04294	1.04067	1.03686	1.02553	1.0107	1.03709	1.0343	1.03535			10.4	1.03263	1.04261	1.03177	1.0618	1.01939	1.01783	1.01062	1.04336	1.05669	1.0319	1.01388	1.03179	1.03866	1.01028
	10.5	1.04407	1.05051	1.05627	1.05263	1.0401	1.05861	1.05172	1.0654	1.04745	1.01656	1.03605	1.01355	1.03997			10.5	1.03093	1.02833	1.01464	1.0452	1.02935	1.03515	1.01684	1.04197	1.03882	1.03247	1.02734	1.00969	1.03939	1.03532	1.03843			10.5	1.03224	1.04377	1.03764	1.05793	1.02165	1.02111	1.00819	1.04673	1.05095	1.02507	1.00896	1.03285	1.03956	1.00453
	10.6	1.04344	1.04864	1.05524	1.04481	1.03021	1.05488	1.04812	1.0654	1.04845	1.01656	1.04129	1.01355	1.05418			10.6	1.03242	1.03048	1.0157	1.0493	1.03245	1.03807	1.02573	1.04003	1.04067	1.03576	1.0228	1.0107	1.03939	1.0343	1.03843			10.6	1.03413	1.0519	1.04467	1.05407	1.02392	1.02193	1.01305	1.04336	1.05478	1.02963	1.01552	1.03497	1.04046	1.00741
	10.7	1.04385	1.04958	1.05937	1.0504	1.03713	1.05395	1.04902	1.0654	1.04745	1.01527	1.03605	1.01355	1.04901			10.7	1.03237	1.02296	1.01041	1.05011	1.03142	1.04195	1.02968	1.04294	1.0379	1.03906	1.03007	1.0107	1.03939	1.03125	1.03535			10.7	1.0325	1.04609	1.04233	1.06276	1.01713	1.02193	1.01305	1.04673	1.05573	1.02621	1.00568	1.03391	1.03324	1.01171
	10.8	1.04504	1.05144	1.0573	1.0504	1.0401	1.0493	1.05082	1.0654	1.04845	1.02172	1.04129	1.02293	1.04126			10.8	1.03088	1.03371	1.01993	1.04438	1.02522	1.02641	1.01585	1.04197	1.04159	1.03796	1.02371	1.01272	1.03824	1.03735	1.0333			10.8	1.03404	1.04145	1.0435	1.07049	1.02279	1.02193	1.01669	1.05349	1.04999	1.02735	1.01716	1.03709	1.04137	1.00741
	10.9	1.04298	1.05144	1.05214	1.05598	1.03417	1.05302	1.04452	1.06864	1.05146	1.01656	1.03736	1.01696	1.03351			10.9	1.03351	1.03371	1.01782	1.04684	1.02935	1.03224	1.02276	1.04488	1.04528	1.04345	1.03007	1.01272	1.03824	1.03329	1.03843			10.9	1.03184	1.04493	1.03998	1.05986	1.02731	1.01947	1.0094	1.05011	1.04617	1.02394	1.01224	1.03497	1.03595	1.00741
	11	1.04277	1.05051	1.05937	1.05151	1.03615	1.04837	1.04092	1.06378	1.04444	1.02172	1.0439	1.02037	1.03222			11	1.03436	1.03156	1.01887	1.0411	1.02935	1.04292	1.02474	1.04197	1.04436	1.04235	1.03279	1.01473	1.04054	1.03836	1.03741			11	1.03313	1.04493	1.03881	1.06083	1.02392	1.02193	1.00454	1.04561	1.0586	1.02735	1.01224	1.02967	1.03595	1.01028
	11.1	1.04105	1.05331	1.05008	1.05487	1.03713	1.05209	1.04092	1.06621	1.04645	1.01011	1.03736	1.01184	1.03222			11.1	1.03415	1.03048	1.01464	1.04848	1.03245	1.04001	1.0277	1.04391	1.04621	1.04345	1.03097	1.00969	1.03939	1.03532	1.03535			11.1	1.03322	1.04377	1.04467	1.07049	1.02165	1.02111	1.01305	1.05574	1.04904	1.02849	1.0188	1.02967	1.03233	1.00741
	11.2	1.04341	1.04585	1.05524	1.05934	1.04208	1.05302	1.04542	1.06945	1.05246	1.01398	1.03998	1.00928	1.0348			11.2	1.03096	1.03156	1.01676	1.04684	1.03038	1.03515	1.02276	1.03809	1.03882	1.03686	1.02734	1.01272	1.03363	1.03227	1.03022			11.2	1.0308	1.04145	1.04115	1.06276	1.02392	1.01701	1.0094	1.05236	1.04904	1.02166	1.01552	1.02967	1.02692	1.00453
	11.3	1.04278	1.04771	1.05937	1.05822	1.04109	1.04651	1.03461	1.07513	1.05146	1.01785	1.03866	1.01184	1.03093			11.3	1.03397	1.03156	1.01782	1.0493	1.02728	1.03807	1.03856	1.04391	1.04436	1.04126	1.02734	1.01372	1.03478	1.02922	1.03843			11.3	1.03241	1.0368	1.03646	1.06373	1.02392	1.01865	1.01183	1.05349	1.04617	1.0319	1.01388	1.03073	1.03414	1.00884
	11.4	1.04154	1.04678	1.05834	1.05487	1.03417	1.04186	1.04092	1.07513	1.04745	1.01527	1.04259	1.00502	1.03609			11.4	1.03336	1.02296	1.01358	1.0452	1.02832	1.04486	1.03363	1.04391	1.04805	1.04126	1.02916	1.01473	1.03478	1.02821	1.03843			11.4	1.03104	1.04261	1.03998	1.06469	1.01713	1.01783	1.00819	1.05123	1.04521	1.0319	1.01388	1.02543	1.03685	1.00741
	11.5	1.04172	1.04771	1.0604	1.05598	1.03615	1.05116	1.04002	1.06945	1.04946	1.00495	1.03998	1.00928	1.03609			11.5	1.03626	1.02941	1.01782	1.04848	1.03142	1.0468	1.03461	1.05071	1.04621	1.04345	1.03097	1.01775	1.03824	1.03329	1.03843			11.5	1.03045	1.04377	1.03764	1.06469	1.01487	1.02193	1.00819	1.04673	1.04521	1.02166	1.01224	1.02755	1.04137	1.01314
	11.6	1.0424	1.04678	1.05317	1.05934	1.04603	1.04465	1.03822	1.06621	1.04946	1.01914	1.03866	1.00843	1.03868			11.6	1.03405	1.02833	1.02099	1.04848	1.03142	1.03515	1.03066	1.04197	1.04251	1.04016	1.03007	1.01372	1.04054	1.03633	1.03638			11.6	1.03107	1.04145	1.03177	1.06759	1.01826	1.01783	1.00697	1.05123	1.0433	1.02735	1.0106	1.02755	1.04408	1.00884
	11.7	1.0444	1.04958	1.0573	1.0571	1.03713	1.05023	1.04092	1.07107	1.05246	1.01527	1.04521	1.01781	1.03868			11.7	1.03643	1.02941	1.01887	1.05175	1.03245	1.04195	1.03856	1.04585	1.04344	1.04235	1.02825	1.01775	1.04054	1.03735	1.04152			11.7	1.03316	1.04261	1.03881	1.07242	1.016	1.01701	1.01305	1.05011	1.05095	1.02735	1.01388	1.03391	1.04046	1.00597
	11.8	1.04218	1.04025	1.05214	1.0571	1.03318	1.04093	1.03461	1.06702	1.05146	1.01656	1.04521	1.01867	1.04901			11.8	1.03604	1.02833	1.0157	1.0493	1.03348	1.04292	1.02671	1.0478	1.04528	1.04235	1.03188	1.01574	1.04514	1.03633	1.04357			11.8	1.03409	1.04377	1.04115	1.07146	1.02165	1.01865	1.01183	1.05236	1.04617	1.02963	1.0188	1.02861	1.03775	1.00167
	11.9	1.04342	1.04305	1.0666	1.0571	1.03219	1.04651	1.03551	1.06702	1.04745	1.01656	1.04129	1.01611	1.0516			11.9	1.03649	1.02941	1.02099	1.05175	1.03142	1.04195	1.03757	1.04391	1.04067	1.03906	1.0337	1.01473	1.04169	1.03735	1.04665			11.9	1.03475	1.04261	1.04467	1.06566	1.02731	1.02275	1.01426	1.05236	1.04713	1.02394	1.01388	1.03179	1.03685	1.0031
	12	1.0427	1.04025	1.05317	1.05487	1.04109	1.04558	1.03371	1.0654	1.05146	1.02172	1.03998	1.01611	1.04901			12	1.0349	1.02618	1.01464	1.04438	1.03245	1.04195	1.03856	1.04197	1.04528	1.04016	1.02462	1.01675	1.04284	1.03836	1.04049			12	1.03435	1.04493	1.0435	1.06662	1.02618	1.02357	1.01305	1.06024	1.04521	1.02166	1.00896	1.02967	1.03685	1.01028
	12.1	1.04164	1.03838	1.05214	1.05151	1.04109	1.04558	1.03281	1.06216	1.04444	1.02302	1.03998	1.01952	1.04901			12.1	1.03714	1.03048	1.02099	1.0493	1.03245	1.04001	1.03955	1.04585	1.04621	1.04784	1.02916	1.01977	1.04054	1.03329	1.0446			12.1	1.03344	1.04261	1.03881	1.06373	1.01826	1.01783	1.01669	1.05799	1.03947	1.02507	1.01552	1.03179	1.03866	1.00884
	12.2	1.04103	1.03931	1.05524	1.05487	1.03911	1.04558	1.03731	1.06135	1.04946	1.01785	1.04521	1.01099	1.03609			12.2	1.03492	1.03048	1.01782	1.04602	1.03038	1.03612	1.02671	1.04585	1.04713	1.04455	1.02825	1.01473	1.04399	1.03735	1.03946			12.2	1.03484	1.04609	1.04115	1.06373	1.02279	1.02357	1.01305	1.05574	1.03278	1.02963	1.01224	1.03179	1.04408	1.00884
	12.3	1.04298	1.04678	1.05937	1.0571	1.03812	1.04651	1.03731	1.06297	1.04845	1.01398	1.04652	1.01867	1.03997			12.3	1.03571	1.02618	1.01887	1.05011	1.02728	1.04098	1.0356	1.04683	1.0499	1.04345	1.02553	1.01775	1.04169	1.03633	1.03946			12.3	1.03538	1.04493	1.04467	1.06856	1.01826	1.02357	1.01426	1.05349	1.03565	1.02963	1.00896	1.03073	1.04227	1.00167
	12.4	1.04302	1.04585	1.05627	1.0571	1.03911	1.04558	1.03281	1.06783	1.05046	1.01656	1.04521	1.02208	1.03739			12.4	1.03665	1.02941	1.01887	1.0452	1.03348	1.04486	1.02968	1.04585	1.04713	1.04235	1.02916	1.01272	1.04629	1.04344	1.0446			12.4	1.03404	1.04725	1.04233	1.07339	1.02165	1.01947	1.0179	1.05236	1.04043	1.02963	1.00732	1.03285	1.04317	1.00597
	12.5	1.04105	1.04211	1.05524	1.05375	1.03615	1.04	1.03281	1.06297	1.04745	1.02043	1.0439	1.02293	1.0348			12.5	1.03551	1.02941	1.02416	1.0452	1.03245	1.04098	1.02573	1.04585	1.04528	1.04565	1.02553	1.01473	1.04745	1.04141	1.0333			12.5	1.03409	1.04377	1.04584	1.06856	1.01713	1.02029	1.01305	1.05686	1.03852	1.03304	1.01224	1.03179	1.03866	1.0031
	12.6	1.04175	1.04305	1.04801	1.05934	1.04208	1.04465	1.03731	1.05972	1.04745	1.02302	1.04129	1.02549	1.02964			12.6	1.0348	1.02941	1.02205	1.04684	1.03038	1.03612	1.02671	1.04488	1.04436	1.04235	1.02643	1.01574	1.04514	1.04344	1.0333			12.6	1.03346	1.04842	1.04819	1.07339	1.01374	1.02111	1.01426	1.05686	1.03182	1.02849	1.00732	1.03497	1.03414	1.00453
	12.7	1.04179	1.04025	1.05421	1.0571	1.03911	1.04372	1.03551	1.06297	1.04745	1.01656	1.03866	1.02464	1.04126			12.7	1.03578	1.02833	1.0157	1.04766	1.03245	1.04195	1.03264	1.05071	1.04436	1.04126	1.02825	1.01473	1.04514	1.04141	1.03638			12.7	1.03253	1.04261	1.03881	1.06662	1.01939	1.02768	1.01183	1.04786	1.03182	1.0319	1.01552	1.03073	1.03866	1.00167
	12.8	1.04152	1.04118	1.04492	1.06045	1.04406	1.04372	1.03822	1.06216	1.05146	1.01527	1.03736	1.01952	1.03997			12.8	1.0363	1.03264	1.01993	1.05503	1.03348	1.03807	1.02474	1.04585	1.0499	1.04345	1.02553	1.01977	1.04514	1.04141	1.0333			12.8	1.03234	1.04842	1.04233	1.06759	1.01826	1.01947	1.01547	1.04561	1.03756	1.03076	1.01388	1.03603	1.03504	1.00167
	12.9	1.04183	1.04211	1.05627	1.05598	1.02923	1.04651	1.03822	1.06378	1.04745	1.01785	1.03866	1.02464	1.04126			12.9	1.03868	1.03371	1.02416	1.05175	1.03142	1.0468	1.03165	1.0478	1.04898	1.04455	1.0337	1.01977	1.04629	1.0404	1.04049			12.9	1.03057	1.03913	1.04467	1.07146	1.01713	1.01947	1.01183	1.04898	1.03852	1.02507	1.00896	1.03603	1.03053	1.00167
	13	1.04218	1.04211	1.05834	1.05487	1.03812	1.04279	1.04092	1.06216	1.04745	1.01527	1.03998	1.02549	1.03868			13	1.03823	1.03371	1.02205	1.05667	1.03762	1.04098	1.04053	1.04585	1.04251	1.04784	1.03279	1.01272	1.04514	1.04141	1.03535			13	1.03254	1.04145	1.04584	1.07146	1.01713	1.02029	1.01305	1.03998	1.03852	1.02849	1.01224	1.03815	1.03685	1.0031
	13.1	1.04081	1.03838	1.05214	1.0571	1.03911	1.04372	1.03731	1.05567	1.04645	1.01527	1.03605	1.0272	1.04126			13.1	1.03748	1.03156	1.02099	1.05503	1.03348	1.04098	1.03264	1.0478	1.0499	1.04126	1.02825	1.01473	1.04629	1.04446	1.03741			13.1	1.03085	1.04493	1.0435	1.07049	1.01487	1.0129	1.0094	1.04786	1.03087	1.02735	1.01388	1.03391	1.03324	0.995924
	13.2	1.04171	1.04491	1.05834	1.05487	1.03713	1.04465	1.03281	1.0581	1.04946	1.0114	1.03605	1.02635	1.04643			13.2	1.03799	1.03909	1.02099	1.05011	1.03348	1.04292	1.03165	1.04488	1.04621	1.04235	1.02916	1.01876	1.04629	1.04446	1.04152			13.2	1.03056	1.03913	1.03412	1.06373	1.02052	1.01947	1.01547	1.04898	1.03182	1.03076	1.0106	1.03603	1.03866	0.998795
	13.3	1.04136	1.05144	1.05834	1.04928	1.03417	1.04558	1.03641	1.05567	1.04444	1.01785	1.03212	1.02976	1.04126			13.3	1.03604	1.02941	1.02099	1.0493	1.03452	1.03612	1.02671	1.04683	1.0499	1.04235	1.02916	1.01675	1.04169	1.04344	1.03741			13.3	1.03022	1.0368	1.03412	1.07049	1.02392	1.0285	1.01426	1.05123	1.03374	1.01939	1.00732	1.03603	1.03956	0.993054
	13.4	1.04028	1.04678	1.05834	1.05263	1.03318	1.04651	1.03191	1.05486	1.04545	1.01527	1.03212	1.02635	1.03997			13.4	1.03664	1.03156	1.02311	1.05257	1.02832	1.04292	1.01882	1.04683	1.04805	1.04345	1.02734	1.01675	1.04629	1.04649	1.04049			13.4	1.0322	1.04261	1.03412	1.06759	1.02165	1.02932	1.01305	1.04898	1.03947	1.02621	1.01552	1.03285	1.03685	0.99736
	13.5	1.03999	1.04864	1.06143	1.05375	1.0401	1.04	1.02921	1.05486	1.04043	1.01656	1.0295	1.02805	1.03739			13.5	1.03605	1.02833	1.02522	1.04192	1.03142	1.04098	1.0277	1.04391	1.04621	1.04016	1.02553	1.01876	1.0486	1.04649	1.03946			13.5	1.03269	1.04377	1.03881	1.07435	1.01939	1.03014	1.01547	1.05123	1.03947	1.01825	1.01224	1.02967	1.03504	0.99736
	13.6	1.04153	1.05051	1.05627	1.05151	1.03812	1.04651	1.03101	1.06216	1.04344	1.01785	1.03212	1.02635	1.04255			13.6	1.03558	1.03371	1.02734	1.04684	1.03142	1.0371	1.02474	1.04391	1.04898	1.04345	1.02734	1.01574	1.04284	1.04344	1.03125			13.6	1.03178	1.04609	1.04115	1.06662	1.02844	1.02686	1.01547	1.05123	1.03278	1.02166	1.01224	1.03285	1.03414	1.00453
	13.7	1.04045	1.04958	1.05937	1.0504	1.03021	1.04651	1.02921	1.06216	1.04845	1.01785	1.03866	1.01696	1.03609			13.7	1.03597	1.03264	1.02416	1.04028	1.02832	1.0371	1.02671	1.04683	1.04713	1.04126	1.02734	1.01775	1.04399	1.04548	1.0446			13.7	1.03234	1.04725	1.04936	1.06759	1.02165	1.02111	1.01547	1.03998	1.03852	1.02394	1.0106	1.03391	1.03233	0.998795
	13.8	1.03979	1.04305	1.05524	1.05487	1.0401	1.04186	1.03371	1.0581	1.04444	1.01398	1.03866	1.02379	1.02964			13.8	1.03736	1.03371	1.02628	1.04684	1.03555	1.04778	1.02671	1.0478	1.0499	1.04455	1.02462	1.01675	1.04169	1.04548	1.03535			13.8	1.03115	1.04261	1.03646	1.06759	1.01374	1.01947	1.01669	1.04448	1.03947	1.02849	1.01224	1.03497	1.03233	1.00023
	13.9	1.03787	1.04305	1.0604	1.05263	1.02824	1.04651	1.03191	1.05324	1.04144	1.01656	1.03343	1.01867	1.02834			13.9	1.03564	1.02726	1.01358	1.04602	1.03348	1.04486	1.03363	1.04683	1.04805	1.03686	1.02189	1.01977	1.04284	1.04243	1.04152			13.9	1.03142	1.03913	1.03646	1.07532	1.01826	1.02275	1.0179	1.04336	1.03947	1.02507	1.01224	1.03603	1.02511	0.993054
	14	1.03787	1.03931	1.04801	1.05487	1.03417	1.04465	1.03011	1.0508	1.04645	1.01914	1.03474	1.02123	1.03093			14	1.03848	1.02726	1.02522	1.0493	1.03245	1.04972	1.04152	1.04877	1.05175	1.04675	1.02825	1.02078	1.03709	1.04446	1.03535			14	1.03037	1.0368	1.03764	1.07242	1.02165	1.02439	1.01547	1.0366	1.03565	1.02507	1.01224	1.03391	1.03504	0.995924
	14.1	1.03748	1.04398	1.06143	1.05487	1.02824	1.04372	1.03912	1.0508	1.04444	1.01527	1.02819	1.01525	1.02447			14.1	1.03723	1.02833	1.02205	1.0493	1.03348	1.04195	1.0356	1.04585	1.05175	1.04126	1.02734	1.01675	1.04054	1.04751	1.03946			14.1	1.03123	1.04493	1.04584	1.07725	1.01713	1.01619	1.01669	1.0366	1.04139	1.02963	1.01552	1.03497	1.03053	0.993054
	14.2	1.03809	1.04771	1.05317	1.05822	1.03318	1.04744	1.03912	1.04918	1.03843	1.01527	1.03605	1.01355	1.02576			14.2	1.03808	1.03586	1.02628	1.04274	1.03038	1.03904	1.03363	1.04974	1.05082	1.04235	1.02643	1.01876	1.04399	1.05259	1.04049			14.2	1.02941	1.04377	1.03881	1.07146	1.02279	1.01783	1.01305	1.0366	1.0433	1.01825	1.00732	1.03497	1.02601	0.993054
	14.3	1.03795	1.04305	1.05008	1.05822	1.03318	1.04372	1.03191	1.06054	1.04545	1.01011	1.03474	1.01611	1.02834			14.3	1.03778	1.02833	1.02311	1.04274	1.03762	1.04875	1.03856	1.04585	1.05267	1.04235	1.02371	1.02078	1.04054	1.04446	1.03946			14.3	1.03114	1.04609	1.05171	1.07242	1.01147	1.01619	1.01183	1.03548	1.0433	1.02735	1.01388	1.03603	1.02962	0.998795
	14.4	1.03985	1.04491	1.05524	1.05822	1.03911	1.04279	1.03371	1.05972	1.04745	1.01527	1.03866	1.01867	1.02447			14.4	1.03628	1.02726	1.02628	1.04356	1.03142	1.03904	1.03264	1.04974	1.0499	1.04675	1.02643	1.01775	1.03939	1.04344	1.03433			14.4	1.03204	1.04725	1.04819	1.06662	1.01826	1.02111	1.01305	1.03885	1.04713	1.02394	1.02044	1.03815	1.02962	0.994489
	14.5	1.0407	1.04491	1.05627	1.05822	1.04307	1.04279	1.03191	1.06054	1.05146	1.0114	1.04259	1.01952	1.02576			14.5	1.03754	1.03156	1.02205	1.04684	1.03348	1.04195	1.03955	1.05071	1.04713	1.04345	1.02643	1.01675	1.04284	1.04548	1.03741			14.5	1.03146	1.04609	1.0435	1.06759	1.02392	1.01619	1.01305	1.04673	1.04043	1.0228	1.01716	1.03709	1.03685	0.998795
	14.6	1.0415	1.04398	1.05937	1.05598	1.03911	1.04558	1.03461	1.06378	1.05146	1.01269	1.04129	1.01269	1.03739			14.6	1.03698	1.02833	1.02416	1.0493	1.03245	1.04292	1.03165	1.04585	1.04898	1.04345	1.02734	1.02078	1.04169	1.04243	1.03843			14.6	1.02976	1.04609	1.04115	1.06662	1.016	1.01701	1.01062	1.04336	1.04234	1.02394	1.01224	1.03285	1.03053	0.993054
	14.7	1.03997	1.03745	1.05317	1.05934	1.04603	1.03721	1.03101	1.06621	1.04645	1.01011	1.04259	1.01525	1.0348			14.7	1.03547	1.03156	1.02205	1.05175	1.03142	1.03612	1.03757	1.05265	1.04805	1.04126	1.0228	1.01775	1.03709	1.03735	1.02919			14.7	1.02995	1.04493	1.03529	1.06952	1.01713	1.01537	1.01062	1.04336	1.03374	1.02849	1.01224	1.03709	1.02601	0.99736
	14.8	1.03863	1.04398	1.06143	1.06269	1.04505	1.03256	1.02651	1.06054	1.04144	1.00882	1.03866	1.00843	1.03351			14.8	1.03634	1.03479	1.02205	1.04438	1.03245	1.04583	1.03066	1.04877	1.04621	1.04016	1.02553	1.02179	1.03939	1.04141	1.03535			14.8	1.03048	1.04377	1.03881	1.07629	1.01939	1.0088	1.00819	1.03548	1.03661	1.02166	1.0106	1.03497	1.03414	0.995924
	14.9	1.03912	1.04398	1.06143	1.06045	1.03318	1.03814	1.03551	1.06054	1.04545	1.01398	1.03998	1.00843	1.02834			14.9	1.03517	1.03264	1.02416	1.04438	1.02625	1.03515	1.02869	1.04877	1.04528	1.03796	1.01826	1.01775	1.04514	1.04751	1.04049			14.9	1.0311	1.04609	1.0435	1.06952	1.016	1.01537	1.01062	1.04336	1.03565	1.02166	1.01716	1.02861	1.03053	1.00023
	15	1.03895	1.03931	1.05627	1.06045	1.0401	1.03907	1.03461	1.06702	1.04845	1.0114	1.03736	1.00758	1.02576			15	1.0388	1.03048	1.02099	1.0493	1.03452	1.04389	1.02869	1.05459	1.05636	1.04565	1.02916	1.02279	1.04284	1.04243	1.04152			15	1.03147	1.0519	1.04233	1.06662	1.02392	1.01619	1.01547	1.03885	1.03852	1.0228	1.01388	1.02649	1.0233	1.00167
[truncated: 18 more columns]
