# Supplementary material for: FRET kinase sensor development reveals SnRK2/OST1 activation by ABA but not by MeJA and high CO2 during stomatal closure
Source: eLife. 2020 May 28;9:e56351. doi: 10.7554/eLife.56351 (PMC7289597; doi:10.7554/eLife.56351)
Supplement: Figure 6—figure supplement 2—source data 1. [file elife-56351-fig6-figsupp2-data1.xlsx]

## Sheet: Figure 6-figure supplement 2
Figure 6- figure supplement 2A		Normalized ratio																								Figure 6- figure supplement 2B		Normalized ratio																					Figure 6- figure supplement 2C
	Time (min)	Average	Stomate_1	Stomate_2	Stomate_3	Stomate_4	Stomate_5	Stomate_6	Stomate_7	Stomate_8	Stomate_9	Stomate_10	Stomate_11	Stomate_12	Stomate_13	Stomate_14	Stomate_15	Stomate_16	Stomate_17	Stomate_18	Stomate_19	Stomate_20	Stomate_21	Stomate_22			Time (min)	average	Stomate_1	Stomate_2	Stomate_3	Stomate_4	Stomate_5	Stomate_6	Stomate_7	Stomate_8	Stomate_9	Stomate_10	Stomate_11	Stomate_12	Stomate_13	Stomate_14	Stomate_15	Stomate_16	Stomate_17	Stomate_18	Stomate_19
	0.1	0.997868	0.991622	1.00534	1.00912	1.00239	1.00973	1.00265	0.995084	0.998523	1.00154	1.00402	0.996779	0.988028	0.987298	0.995214	0.989742	0.995275	1.00201	1.00233	0.989001	0.995415	1.00151	0.990484			0.1	0.99867	1.00558	0.993458	0.996903	0.996371	1.00577	1.0021	0.998071	0.99957	0.99632	1.00588	1.00544	0.991454	0.998686	0.995553	0.989803	0.999488	0.998859	0.994892	1.00054
	0.2	0.997249	0.995593	1.00534	0.999053	0.997151	1.00139	1.00358	0.997058	0.999326	0.992235	0.998311	1.00125	0.993363	0.9895	0.995214	0.990869	1.00044	0.994013	0.999976	0.989001	0.998556	1.00479	0.993477			0.2	0.998965	1.00971	0.994467	1.00379	1.00082	1.00355	1.00006	0.996252	0.99957	0.999792	1.00353	1.00015	0.991454	0.999881	0.995553	0.996984	1.00182	1.00019	0.988976	0.993794
	0.3	0.997591	0.993608	1.00329	0.989989	1.00029	1.00417	1.00544	0.997058	1.00093	0.999848	1.0063	0.998568	0.996564	0.988399	0.992598	0.991996	0.996566	0.995156	1.00351	0.989001	0.996462	1.00479	0.992479			0.3	0.998611	1.00971	0.992448	1.00149	0.996371	1.00244	0.998026	0.993522	0.996501	0.999792	1.00471	1.00015	0.995603	1.00466	0.98871	0.993393	0.999488	1.00019	0.995878	1.00054
	0.4	0.997522	1.00155	1.01047	0.998046	0.996104	0.995831	1.00544	0.998045	1.00013	0.999848	1.00173	1.00394	0.988028	0.9906	0.992598	0.994251	0.997857	0.995156	0.999976	0.98524	0.994369	1.00479	0.991482			0.4	0.998266	1.00455	0.984371	1.00264	1.00082	1.00466	1.00311	0.997161	0.99957	1.00095	1.00471	1.00332	0.992491	1.00108	0.994412	0.993393	0.998324	0.998859	0.989962	0.99267
	0.5	0.997311	0.991622	1.00226	0.997039	1.00029	1.00046	1.00822	0.997058	1.00093	1.00069	0.993748	0.997674	0.99443	0.992802	0.995214	0.991996	0.995275	0.996298	1.00233	0.988061	0.996462	1.00151	0.996469			0.5	0.999817	1.00971	0.997496	1.00149	0.998597	1.00688	1.00311	0.995342	1.00059	0.999792	1.00824	1.00438	0.994566	1.00227	0.996693	0.99459	0.998324	0.998859	0.99292	0.99267
	0.6	0.999169	1.00056	1.00945	1.00006	0.998198	0.999537	1.00544	1.00594	1.00093	0.993926	1.00288	1.00125	0.99443	0.999406	0.993906	0.994251	0.999148	0.992871	1.00115	0.992761	0.996462	1.0037	0.995471			0.6	0.999487	1.01178	0.992448	1.00264	1.00194	1.00577	1.0021	0.998981	1.00571	0.999792	1	0.99909	0.99664	1.00108	0.996693	0.992196	0.995997	0.998859	0.995878	0.99267
	0.7	0.999301	0.995593	1.00431	1.00006	0.998198	1.00139	1.00729	1.00298	1.00334	1.00154	0.99603	0.997674	0.995497	0.991701	0.995214	0.996505	1.00173	0.998583	1.00351	0.992761	0.996462	1.00479	0.999461			0.7	1.00014	0.99938	0.997496	1.00034	1.00194	1.00355	1.00413	0.998981	1.00469	1.00095	1.00471	1.00544	0.993529	1.00108	1.00125	0.995787	0.999488	1.00019	0.995878	0.993794
	0.8	0.999152	0.997578	1.00739	0.999053	1.00029	1.00324	1.00265	1.00298	1.00254	0.995618	0.999452	0.999463	0.995497	0.999406	0.995214	0.995378	0.996566	0.997441	1.00115	0.993701	1.00065	1.0026	0.993477			0.8	0.99819	0.99938	0.999515	0.999197	0.998597	1.00466	1.00413	0.993522	0.992409	0.99632	1.00588	0.99909	0.992491	1.00227	0.997833	0.993393	0.998324	1.00019	0.996864	0.991546
	0.9	0.999038	1.00254	1.00637	1.00006	1.00239	1.00602	0.99616	0.999033	1.00254	0.996464	0.998311	1.00036	0.997631	1.00051	0.995214	0.993124	1.00044	0.995156	0.999976	0.991821	1.00065	1.0026	0.991482			0.9	1.00016	1.00351	0.996487	1.00608	1.00305	1.00244	1.00413	0.996252	0.99957	0.997477	1.00471	1.00121	0.993529	0.998686	0.998974	1.00057	0.998324	1.00019	1.00179	0.996043
	1	0.999162	1.00056	1.00739	1.00107	0.999246	0.997684	1.00265	1.00199	1.00414	0.999002	1.00059	0.999463	0.995497	0.996104	0.997829	0.994251	1.00044	0.999726	0.997624	0.991821	0.997509	1.00151	0.995471			1	0.999126	0.998346	0.998506	0.99805	1.00082	1.00244	1.00108	0.998071	0.998547	0.999792	1.00353	0.99909	0.995603	0.999881	0.997833	0.999378	0.997161	1.00151	0.998837	0.994919
	1.1	0.998972	1.00254	1.00534	1.00006	1.00029	1.00324	1.0008	0.998045	0.996918	0.996464	1.00173	0.998568	0.99443	0.997204	0.992598	0.995378	1.00173	0.997441	0.9988	0.989001	1.00065	1.0037	1.00245			1.1	0.999309	1.00455	0.993458	1.00034	0.999711	0.998004	0.998026	0.998071	1.00162	0.998635	1.00471	1.00332	0.998714	1.00466	1.00125	0.993393	0.995997	0.997533	0.998837	0.996043
	1.2	0.99855	1.00254	0.999178	0.997039	1.00029	0.994905	1.00173	0.996071	1.00173	0.999002	1.00173	1.00215	0.985894	0.997204	0.993906	0.996505	1.00302	0.998583	0.999976	0.989001	0.997509	1.0037	1.00644			1.2	1.0009	1.00765	1.01062	1.00493	0.996371	1.00133	1.0021	1.0008	1.00571	1.00211	1.00471	1.00226	0.992491	0.997491	0.995553	0.996984	0.997161	1.00019	1.00377	0.994919
	1.3	0.999505	0.998571	0.995071	1.00207	1.00239	1.00232	1.00451	1.00002	0.996918	0.999848	1.00173	0.999463	0.993363	1.00161	0.996521	0.996505	0.999148	1.00201	0.9988	0.990881	0.999602	0.999322	1.00844			1.3	0.999104	0.990079	1.00153	0.987725	0.997484	0.999113	1.00311	0.998071	1.00366	1.00211	1.00471	1.00332	0.995603	0.999881	0.998974	0.999378	0.997161	0.998859	1.00278	0.999415
	1.4	0.99891	1.00056	0.995071	0.999053	1.00239	0.999537	1.00451	1.00298	1.00013	0.99731	1.00059	0.997674	0.99443	1.00161	0.992598	0.999887	1.00173	0.995156	0.996447	0.989001	0.997509	1.00042	1.00744			1.4	0.998841	0.992146	0.995477	0.988872	0.998597	0.996895	1.00311	1.00171	0.998547	1.00211	1	0.99909	0.99664	0.997491	1.00011	1.00417	0.998324	1.00151	1.00377	0.999415
	1.5	1.00031	0.999563	0.994044	1.00207	1.00344	0.999537	1.00173	1.00002	1.00254	1.00408	0.998311	1.00573	0.993363	1.00051	0.995214	0.996505	1.00173	1.00658	1.00468	0.991821	0.999602	1.00042	1.00545			1.5	0.99836	0.989045	1.00355	0.986578	1.00082	0.995786	0.999044	1.0008	1.00162	1.00326	1.00235	0.998031	0.99664	1.00227	1.00011	0.998181	0.997161	1.00151	0.994892	0.997167
	1.6	1.00065	1.00353	0.996098	1.00308	1.00448	1.00046	1.00358	0.999033	1.00173	1.00239	0.99603	1.00304	0.995497	1.00271	0.996521	1.00101	1.00044	0.998583	0.996447	0.994641	0.999602	1.00588	1.00944			1.6	0.998857	0.988012	0.998506	0.981989	1.00194	0.995786	1.00108	1.00535	1.00264	0.999792	1.00706	1.00226	0.995603	0.999881	0.998974	0.999378	0.999488	1.00019	0.999823	1.00054
	1.7	1.00188	1.00155	0.994044	1.00207	1.00448	1.00695	1.00822	1.00397	1.00494	1.00661	0.993748	0.999463	0.997631	1.00271	0.999137	1.00101	1.00044	1.00201	0.9988	1.00686	1.0017	1.00151	1.00345			1.7	0.997093	0.991112	0.993458	0.987725	1.00082	0.994677	0.999044	0.999891	0.997524	0.998635	0.996471	0.99274	0.99664	0.999881	0.997833	0.996984	1.00182	1.00549	0.996864	0.997167
	1.8	1.00015	1.00651	0.999178	1.0061	1.00658	1.00232	1.00451	1.00199	0.995312	0.999848	0.99603	1.00394	0.991229	1.00161	0.989982	0.99876	0.999148	1.00315	0.9988	1.00028	0.996462	0.997135	1.00445			1.8	1.0014	0.99938	1.00961	0.991167	1.00639	0.994677	1.00006	1.00899	1.00162	1.00326	1.00588	1.00332	0.998714	0.999881	0.997833	0.998181	1.00182	1.00549	0.999823	1.00054
	1.9	1.00035	0.997578	0.997125	1.0051	1.00448	1.00232	1.00544	1.00298	1.00013	1.00239	1.00288	1.00573	0.99443	0.999406	0.993906	0.995378	0.996566	1.00201	0.996447	1.00498	1.00065	0.998229	0.999461			1.9	0.999133	0.997313	0.998506	0.994608	1.00082	0.993568	0.999044	1.00262	0.991385	0.998635	1.00471	1.00121	0.998714	1.00227	1.00354	1.00177	0.999488	1.00019	0.996864	0.998291
	2	1.00205	0.996585	0.994044	1.0061	1.00658	1.00324	1.00451	1.00397	0.99772	1.00239	0.999452	1.00304	0.998698	1.00711	1.00175	0.99876	1.00044	1.0043	1.00468	1.00404	1.0017	1.00151	1.00445			2	1.00017	0.99938	0.993458	0.993461	1.0075	0.995786	1.00006	0.998981	0.993432	1.00442	1.00941	1.00121	0.999751	1.00585	0.996693	1.00297	1.00414	1.00151	0.996864	0.998291
	2.1	1.00146	1.00155	0.999178	1.00207	1.00344	1.00324	1.00265	0.999033	1.00254	1.00323	0.99717	0.998568	0.999765	1.00381	1.00044	0.996505	0.996566	1.00887	1.00586	1.00216	1.0017	1.00042	1.00345			2.1	0.999758	0.995246	1.00456	0.994608	1.00194	0.993568	0.994974	1.00171	0.99957	0.999792	1.00706	1.00332	1.00286	1.00346	0.996693	1.00177	1.00182	1.00151	0.994892	0.996043
	2.2	1.00166	0.999563	0.997125	1.00107	1.00029	1.00324	1.00636	1.00298	0.998523	1.00915	0.998311	1.00036	0.999765	1.00271	1.00044	1.00101	1.00302	1.00087	1.00115	1.0031	1.00274	0.999322	1.00545			2.2	0.9984	0.997313	1.00456	0.99002	0.998597	0.998004	0.998026	1.00262	0.996501	0.994006	1.00118	0.996973	0.999751	0.999881	0.998974	1.00177	1.00298	1.00019	0.989962	0.998291
	2.3	1.00095	0.999563	1.00021	0.998046	1.00134	0.99861	0.99987	1.00496	1.00093	1.00492	1.00059	0.999463	0.996564	0.996104	1.00175	0.99876	0.997857	1.00658	1.00704	1.00122	0.999602	1.00151	1.00545			2.3	0.999335	0.996279	1.00153	0.987725	1.00194	1.00022	1.00108	1.00444	0.998547	1.00326	1.00118	0.99909	1.00183	1.00227	0.997833	1.00417	0.997161	0.996206	0.990948	1.00166
	2.4	1.00024	0.997578	0.997125	0.996032	1.00239	0.99861	1.00451	1.00397	0.998523	1.00323	0.999452	0.992305	0.997631	0.997204	0.997829	1.00214	0.999148	1.00544	1.00233	1.00404	1.00274	1.00151	1.00146			2.4	0.999255	0.997313	0.998506	0.996903	0.999711	0.994677	0.997009	1.00171	0.997524	1.00442	1.00471	0.998031	1.00494	1.00227	1.00011	0.998181	0.998324	0.996206	0.995878	0.999415
	2.5	1.0002	0.997578	0.993017	1.00006	0.998198	0.99861	1.00173	1.00397	0.996918	1.00408	1.00059	0.995884	0.997631	0.996104	1.00044	1.00214	1.00044	1.00658	0.999976	1.00404	1.00379	0.997135	1.00545			2.5	0.998188	0.995246	0.998506	1.00034	0.999711	0.993568	0.994974	0.998071	0.995478	0.997477	1	1.00015	1.00079	0.993908	0.998974	1.00057	0.999488	0.997533	0.996864	1.00391
	2.6	0.999261	0.9946	0.994044	1.00107	0.997151	0.993979	1.00358	1.00298	1.00254	0.999848	1.00059	0.9932	0.997631	0.997204	0.997829	1.00101	1.00044	1.00201	1.00351	1.00404	0.999602	1.00042	0.996469			2.6	0.998806	0.993179	1.00153	0.994608	0.999711	0.999113	1.0021	0.999891	0.995478	0.998635	1.00235	0.995915	1.00079	0.996297	1.00354	1.00057	0.998324	0.998859	0.995878	1.00054
	2.7	0.998771	0.9946	0.994044	0.997039	1.00029	0.995831	1.00265	1.00989	1.00173	0.999848	0.99603	0.9932	0.995497	0.991701	0.999137	1.00214	0.999148	1.00201	1.00468	1.00028	0.999602	0.997135	0.996469			2.7	0.998672	0.997313	0.999515	0.99805	0.997484	0.995786	0.997009	0.996252	0.992409	0.997477	1.00235	0.995915	1.00286	1.00227	1.00354	1.00297	0.998324	0.99488	0.999823	1.00054
	2.8	0.998416	0.998571	0.994044	0.993011	1.00029	0.999537	0.998015	1.00199	1.00013	0.999848	1.00402	0.992305	0.998698	0.998305	1.00044	0.999887	0.996566	0.994013	0.991741	1.0031	1.00065	1.00151	0.998464			2.8	1.00065	1.00145	0.998506	1.00264	1.00305	0.995786	1.00108	1.00535	0.998547	0.99632	1.00235	0.994856	1.00286	0.998686	1.00125	1.00297	1.00182	1.00019	1.00179	1.00279
	2.9	0.999757	0.998571	0.994044	0.996032	1.00239	0.995831	0.99987	1.00101	0.999326	1.00408	0.998311	0.99141	1.0019	0.999406	1.00568	1.00101	0.999148	1.00315	0.999976	1.00404	0.999602	1.00042	0.999461			2.9	1.00119	1.00041	1.00456	1.00379	0.998597	0.995786	0.999044	1.00262	0.992409	0.999792	1.00235	0.99909	1.00286	0.998686	1.00582	1.00417	1.00065	1.00019	1.00672	1.00504
	3	1.00056	1.00254	0.996098	1.00207	1.00029	0.999537	0.997088	1.00199	1.00173	1.00239	1.0063	1.00036	1.00083	0.999406	1.00306	1.00327	0.993984	1.00087	0.991741	1.0031	1.00065	1.00151	1.00345			3	1.00106	1.00041	0.996487	1.00264	0.998597	0.996895	1.00108	1.00353	0.997524	0.999792	1.00118	0.99909	1.00183	0.996297	1.00354	1.00536	1.00182	1.00019	1.00771	1.00616
	3.1	1	1.00056	0.998152	1.00107	1.00029	1.00232	0.986885	0.991135	1.00896	0.999848	1.00173	1.00036	1.00083	0.995003	0.997829	1.00327	1.00173	1.00315	0.996447	1.00592	1.00274	0.999322	1.00245			3.1	0.999491	0.99938	1.00053	1.00034	0.999711	0.99246	0.993957	0.999891	0.995478	0.997477	1.00235	1.00121	1.00183	0.997491	1.00239	0.998181	0.999488	0.997533	1.00672	1.00391
	3.2	1.0005	1.00353	1.00021	1.00308	1.00029	1.00324	0.985957	0.988174	1.00575	1.00408	1.00744	1.00036	1.00297	0.998305	0.995214	1.0044	1.00431	1.00315	1.00115	1.00404	1.00065	0.998229	0.996469			3.2	1.00122	1.00145	0.997496	1.00723	1.00194	1.00133	1.00311	1.00353	0.995478	1.00326	0.997647	0.998031	1.00079	0.997491	1.00239	1.00417	1.00065	0.998859	1.00672	1.00166
	3.3	0.999388	1.00353	1.00226	0.999053	0.995056	0.995831	0.993377	0.998045	1.00334	0.999848	0.998311	0.995884	1.00083	0.9906	0.996521	1.00552	1.00173	0.999726	1.00115	1.0078	1.0017	0.994949	1.00146			3.3	1.00118	1.00041	1.00355	1.00493	0.998597	1.00244	1.00515	0.998981	0.992409	1.00211	1.00235	1.00332	1.00079	0.998686	1.00468	1.00177	1.00182	0.998859	0.998837	1.00279
	3.4	1.00092	1.00453	1.00021	1.00006	1.00239	1.00324	0.997088	0.999033	1.00254	1.00239	0.99717	0.995884	1.00403	0.996104	0.999137	1.00552	1.00173	1.00315	0.9988	1.00592	0.998556	1.00042	1.00245			3.4	1.00055	1.00455	0.999515	1.00149	1.00082	0.998004	1.00108	1.00171	0.998547	1.00211	0.998824	0.995915	1.00183	0.999881	1.00468	1.00297	1.00182	0.997533	0.999823	0.999415
	3.5	1.00061	1.00651	1.00329	1.00308	0.998198	1.00046	0.99616	0.998045	1.00093	0.999848	1.00059	0.999463	1.00937	0.993902	1.00044	1.00327	0.999148	1.00201	0.997624	1.00592	0.998556	0.997135	0.999461			3.5	1.00074	1.00145	1.00456	0.999197	0.999711	0.998004	1.00006	0.998071	0.99957	1.00211	0.997647	0.998031	1.0039	1.00466	1.00239	1.00177	1.00531	0.998859	1.00278	0.996043
	3.6	0.999344	0.996585	0.995071	1.00107	0.999246	1.00324	1.0008	0.996071	1.00093	0.999002	1.00059	0.995884	1.00083	0.997204	1.00306	1.00214	1.00302	0.997441	1.00115	1.00216	0.998556	0.996042	0.995471			3.6	0.999788	0.996279	1.0086	0.99805	1.00082	0.998004	1.00006	0.997161	0.998547	0.997477	0.994118	0.99909	1.00079	0.997491	1.00582	1.00297	1.00414	0.998859	1.00278	0.994919
	3.7	1.00024	1.00453	1.00226	1.00409	0.996104	0.996758	0.99616	1.00002	0.998523	1.00323	0.99717	0.995884	1.0051	0.995003	1.00306	1.00101	0.997857	1.00544	1.00115	1.00592	0.999602	0.993855	1.00245			3.7	1.00072	1.00455	1.0086	1.00608	0.996371	0.999113	0.997009	1.00171	1.00264	0.99632	0.997647	1.00015	1.00701	1.00346	1.00125	0.996984	1.00298	0.99488	1.00081	0.996043
	3.8	0.999561	0.999563	1.00123	1.00308	0.996104	0.999537	0.99245	1.00101	0.995312	0.993081	1.00288	1.00304	1.0019	0.997204	1.00568	1.00327	1.00302	0.995156	0.992918	1.00686	1.00065	0.994949	1.00146			3.8	1.0023	1.00558	1.01163	1.01526	0.999711	1.00244	1.00108	0.995342	0.992409	0.995163	0.994118	0.996973	1.0039	0.999881	1.00468	1.00417	1.0088	1.00284	1.00475	1.00504
	3.9	1.00021	1.00254	1.00123	0.998046	0.995056	0.997684	0.99616	1.00298	1.00173	1.00069	0.998311	1.00036	1.00297	0.999406	0.996521	1.00552	0.999148	0.996298	0.9988	1.00874	1.00379	0.997135	1.00146			3.9	1.00129	1.00455	1.00759	1.00837	0.997484	1.00244	1.00108	1.00353	0.998547	1.00211	0.994118	1.00015	1.00494	1.00227	0.998974	0.996984	1.00298	0.997533	1.00377	0.997167
	4	0.999604	1.00056	1.00226	0.999053	0.994009	0.996758	0.99616	0.996071	0.998523	0.996464	1.00059	1.00304	1.00403	0.999406	0.996521	1.00778	1.00173	0.997441	0.9988	1.00404	1.00065	0.994949	1.00245			4	1.00136	1.00041	1.00557	1.00608	0.995258	1.00022	0.997009	0.998071	1.00059	1.00211	0.990588	0.99909	1.00597	1.00585	1.00468	1.00417	0.999488	0.998859	1.00574	1.00616
	4.1	0.999872	1.00254	1.00226	0.997039	0.991914	0.994905	0.994305	0.997058	0.996918	1.00069	1.00173	1.00304	0.998698	1.00381	0.999137	1.0044	1.00173	0.998583	0.999976	1.00592	1.00484	0.998229	0.999461			4.1	1.00238	1.00351	1.00759	1.00608	0.998597	1.00355	1.00006	0.999891	1.00366	1.00442	0.988235	0.993798	1.01012	1.00585	1.00582	1.00656	1.00065	1.00151	1.00475	1.00054
	4.2	1.00056	1.00453	1.00637	1.00207	0.991914	0.996758	0.998943	1.00002	0.99451	0.996464	1.00288	1.00304	0.999765	1.00381	1.00044	1.00327	1.00302	0.996298	0.9988	1.0078	1.00379	0.999322	0.998464			4.2	1.00135	1.00351	0.999515	1.01182	0.995258	0.998004	0.991922	1.00262	1.00571	0.999792	0.991765	1.00226	1.00494	1.00108	0.998974	1.00417	0.999488	1.00284	1.00574	1.00616
	4.3	1.00006	0.9946	0.999178	1.0061	0.998198	0.99861	0.997088	0.999033	0.996115	0.993081	1.00059	1.00036	1.0051	1.00931	1.00306	0.999887	1.00173	0.997441	0.997624	1.00498	0.999602	0.998229	1.00146			4.3	1.00184	1.00145	1.00053	1.00379	0.998597	1.00244	0.998026	1.0008	1.00571	1.00442	0.994118	1.00015	1.00701	1.00227	1.00125	1.00536	0.999488	0.998859	1.00574	1.00504
	4.4	1.00074	1.00056	1.00123	1.00207	1.00134	1.00509	0.997088	0.995084	0.992102	0.993926	1.00059	1.00125	1.00297	1.00711	1.00306	1.00214	1.00044	1.00315	0.997624	1.0078	1.00379	0.999322	0.998464			4.4	1.00195	1.00455	0.998506	1.00608	0.996371	1.00466	1.00006	1.00353	1.0098	1.00095	0.992941	1.00015	1.00597	1.00227	0.998974	1.00057	1.00065	1.00151	1.00672	1.00279
	4.5	1.0005	0.999563	0.999178	0.992004	1.00134	0.996758	0.99616	1.00002	0.998523	0.99731	1.00173	1.00304	1.0051	1.00491	1.00306	1.00665	1.00173	0.999726	0.997624	1.00498	1.00379	0.999322	0.998464			4.5	1.0019	1.00248	1.00456	1.00493	1.00194	1.00577	1.00311	0.995342	1.00366	1.00095	0.991765	1.00121	1.00597	0.995102	0.996693	1.00417	1.00065	1.00284	1.00771	1.00728
	4.6	1.00077	1.00353	1.00329	0.993011	1.00029	0.999537	0.994305	0.999033	0.996115	0.99731	0.998311	1.00036	1.0051	1.00931	1.0096	1.00327	0.997857	0.994013	0.9988	1.00498	1.00379	1.0026	1.00245			4.6	1.00281	1.00145	1.0086	1.00837	1.00528	1.00466	0.999044	1.00262	1.00776	0.994006	0.992941	1.00121	1.01012	1.00227	1.00011	1.00417	0.998324	1.00151	1.00475	1.00616
	4.7	1.0004	0.999563	0.997125	1.00006	0.997151	0.9912	0.99616	0.999033	1.00013	1.00239	0.998311	1.00841	1.00617	1.00931	1.00568	1.00891	0.999148	0.998583	0.996447	1.00498	1.00274	0.993855	0.993477			4.7	0.999436	0.991112	0.994467	1.00264	0.998597	0.996895	0.993957	0.998981	1.00776	1.00326	0.992941	1.00121	1.00079	0.995102	1.00011	0.996984	1.00182	1.00682	1.00081	1.00504
	4.8	1.00161	1.00552	1.00021	0.999053	1.00134	1.00046	0.99616	1.00101	0.996918	0.999848	0.999452	1.00841	1.00083	1.00711	1.00437	1.00665	1.0056	1.00087	1.00115	1.00404	0.999602	0.999322	0.997466			4.8	1.00034	0.993179	1.00053	1.00034	1.00082	1.00244	0.997009	1.00262	1.01185	0.997477	0.992941	1.00226	0.998714	0.993908	1.00011	1.00057	1.00065	1.00284	1.00081	1.00728
	4.9	1.00156	1.00552	1.00123	1.00006	1.00134	0.996758	0.998943	0.998045	0.99772	0.998156	0.999452	1.00573	1.0051	1.00931	1.00829	1.0044	1.00173	0.999726	1.00351	1.00216	0.998556	0.998229	1.00046			4.9	0.999661	0.996279	0.990429	1.00149	1.00305	1.00577	1.00006	0.997161	1.00673	0.999792	0.992941	1.00332	0.995603	0.987935	1.00239	1.00297	0.994834	0.997533	1.00574	1.00953
	5	1.00027	0.996585	0.994044	0.994018	1.00239	0.999537	0.994305	1.00199	1.00013	1.00069	0.99717	1.00394	1.00937	1.00601	1.00437	0.99876	0.999148	1.00201	1.00704	1.00216	0.995415	0.999322	0.997466			5	0.999779	0.99938	0.994467	1.00608	1.00194	1.0102	1.00413	1.0008	1.00469	0.999792	0.989412	0.995915	1.00079	0.993908	0.998974	0.996984	0.995997	1.00284	0.99785	1.00166
	5.1	0.999986	1.00651	0.997125	1.00006	0.996104	0.990273	0.997088	1.00002	1.00173	1.00661	0.99717	0.994989	1.00723	1.00711	1.00829	0.996505	0.997857	1.00087	0.999976	1.00404	0.997509	0.997135	0.995471			5.1	1.00074	0.992146	1.00153	1.00723	0.999711	1.00577	0.997009	1.00171	1.01287	1.00211	0.994118	0.99909	1.00079	0.993908	0.998974	1.00177	0.998324	1.00151	1.00278	1.00279
	5.2	1.00036	1.00254	0.997125	0.993011	0.999246	0.997684	0.998943	1.00594	0.995312	1.00239	0.999452	1.00573	1.0051	1.00161	1.00437	0.997633	0.999148	1.00087	0.999976	1.00122	0.997509	1.0026	1.00046			5.2	1.0014	0.997313	0.991438	1.00837	1.00528	1.00577	0.998026	1.00626	1.01185	0.99632	0.994118	1.00332	1.00079	0.998686	1.00011	1.00057	0.998324	1.00682	1.00278	1.00054
	5.3	0.999257	1.00254	0.995071	0.997039	0.999246	0.994905	0.993377	1.00298	0.999326	1.00154	0.993748	1.00304	1.0051	1.00161	1.00698	0.997633	0.992694	0.999726	1.00115	0.997462	0.995415	1.0026	1.00046			5.3	1.00147	0.997313	0.997496	1.00608	1.00305	1.01131	1.00515	1.00262	1.0098	0.997477	0.996471	1.00121	0.99664	0.993908	1.00354	1.00177	0.998324	1.00549	1.00081	0.999415
	5.4	0.99979	1.00254	0.997125	1.00006	1.00029	0.995831	0.99987	1.00496	0.993707	0.998156	0.998311	1.00483	0.997631	0.998305	1.00306	1.00101	0.995275	1.0043	1.00233	0.999342	1.00065	0.999322	0.998464			5.4	1.00062	1.00248	1.00153	1.00837	0.998597	1.00355	0.999044	1.00353	1.00878	1.00211	0.990588	0.99909	0.990417	0.995102	1.00239	1.00297	1.00065	1.00549	0.999823	0.997167
	5.5	0.998754	0.999563	0.994044	0.993011	1.00239	0.999537	0.99616	1.00397	0.989694	0.993081	0.999452	1.00304	1.0051	1.00161	1.00306	1.00214	0.999148	0.999726	0.996447	0.998402	0.995415	0.997135	1.00046			5.5	1.00154	0.99938	1.00557	1.00952	0.999711	1.00466	0.995992	1.00535	1.00878	1.00095	0.989412	1.00015	0.99664	0.999881	1.00468	1.00177	0.998324	1.00284	1.00278	1.00279
	5.6	0.998065	1.00254	0.995071	1.00107	1.00239	0.99861	0.99616	1.00496	0.98568	0.988851	0.992607	0.9932	1.0019	1.00161	1.00306	1.00327	0.993984	1.00201	0.9988	0.997462	0.997509	0.998229	0.998464			5.6	0.999085	0.995246	1.00456	1.00493	0.995258	1.00244	0.997009	1.00171	1.00366	0.998635	0.988235	1.00015	0.995603	0.995102	1.00125	0.998181	0.997161	1.00284	0.99785	1.00279
	5.7	0.997682	1.00254	0.994044	0.992004	1.00134	0.993979	0.99616	1.00199	0.991299	0.992235	1.00059	1.00125	1.0019	1.00271	1.00175	1.00665	0.995275	0.997441	0.995271	0.995581	0.996462	0.996042	0.992479			5.7	0.999516	0.99938	1.00053	0.99805	0.996371	1.00688	1.00108	1.00262	1.00366	0.998635	0.994118	1.00332	0.995603	0.997491	1.00354	0.993393	0.997161	1.00284	0.99785	0.998291
	5.8	0.998353	1.00353	0.990963	0.987975	1.00239	0.996758	0.99987	1.00298	0.988088	0.990543	1.00173	1.00036	1.0019	1.00491	1.00568	1.0044	0.996566	1.00087	0.997624	0.98712	0.996462	1.0026	1.00046			5.8	1.00017	0.996279	1.00355	1.01182	0.995258	0.999113	0.989887	0.999891	1.00162	1.00326	0.990588	1.00756	0.998714	0.997491	1.00468	1.00057	0.999488	1.00682	0.994892	1.00166
	5.9	0.996495	1.00353	0.994044	0.98294	0.999246	0.994905	0.997088	0.997058	0.991299	0.983776	0.993748	0.994989	1.00297	1.00161	1.00568	1.0044	0.996566	0.996298	0.997624	0.990881	0.996462	0.999322	0.998464			5.9	1.00066	0.998346	1.00254	1.00608	0.995258	1.00688	0.998026	1.00262	1.00162	0.999792	0.991765	1.00756	0.995603	0.997491	1.00239	1.00417	1.00065	1.00417	0.995878	1.00166
	6	0.997039	1.00155	0.989936	0.997039	0.997151	0.995831	0.997088	1.00397	0.989694	0.985468	0.990325	0.996779	1.0083	1.00601	1.00437	1.0044	0.996566	1.00087	0.996447	0.989001	0.994369	0.998229	0.991482			6	1.00037	1.00041	1.00254	1.00723	0.997484	1.00466	0.997009	0.999891	1.00264	0.99632	0.988235	1.00967	0.997677	0.998686	1.00239	0.999378	0.997161	1.00284	0.99785	1.00504
	6.1	0.995273	0.996585	0.985829	0.996032	0.994009	0.992126	0.99616	1.00002	0.983272	0.980392	0.99603	0.997674	1.00723	1.00601	1.00306	1.00214	0.990112	0.999726	0.995271	0.988061	0.996462	0.999322	0.990484			6.1	0.998888	0.997313	1.00557	1.00723	0.994144	1.00466	0.999044	0.993522	0.994455	0.999792	0.991765	1.00756	0.991454	0.993908	1.00468	0.999378	0.994834	1.00682	0.989962	1.00279
	6.2	0.994848	0.998571	0.987883	0.997039	0.995056	0.994905	0.993377	0.992122	0.988891	0.979546	0.993748	0.997674	1.0083	1.00821	1.00306	0.999887	0.98753	1.00201	0.990565	0.98524	0.995415	0.997135	0.990484			6.2	0.999774	0.99938	1.00759	1.00952	0.995258	1.00244	0.999044	0.996252	0.99957	0.994006	0.989412	1.0065	0.993529	0.995102	1.00125	1.00057	1.00065	1.00682	0.994892	1.00391
	6.3	0.995024	0.998571	0.985829	0.997039	0.997151	0.99861	0.991522	1.00199	0.988088	0.977009	0.990325	0.997674	1.00937	1.00161	1.00044	0.996505	0.98753	1.0043	0.996447	0.98524	0.996462	0.999322	0.989487			6.3	1.00019	0.99938	1.01264	1.00608	0.997484	1.00022	0.998026	1.00353	1.00366	0.998635	0.990588	1.00967	0.994566	0.999881	1.00239	1.00057	0.991343	1.00151	0.99292	1.00054
	6.4	0.99433	0.997578	0.984802	0.998046	0.997151	0.997684	1.00173	1.00298	0.984878	0.976163	0.98462	0.998568	1.0051	1.00271	1.00437	0.999887	0.992694	0.999726	0.990565	0.9843	0.985995	0.998229	0.987492			6.4	0.999633	0.993179	0.997496	1.00837	0.997484	1.00244	1.00006	1.00171	1.00059	0.999792	0.989412	1.00862	0.994566	0.997491	1.00582	0.999378	0.99367	1.00682	0.989962	1.00616
	6.5	0.993094	0.9946	0.984802	0.989989	0.995056	0.992126	0.997088	1.00002	0.986483	0.975317	0.988043	1.00036	0.999765	1.00161	1.00044	0.997633	0.992694	1.00087	0.995271	0.98618	0.990182	0.996042	0.983502			6.5	1.00038	0.998346	1.00557	1.00379	0.997484	0.999113	0.999044	0.995342	1.00162	1.00211	0.992941	1.01285	0.993529	0.995102	1.00582	1.00297	0.995997	1.00682	0.994892	1.00391
	6.6	0.992707	1.00056	0.988909	0.988982	0.994009	0.993979	0.995233	1.00397	0.984878	0.977009	0.98462	0.994094	1.0019	0.995003	1.00306	0.994251	0.991403	0.998583	0.991741	0.98242	0.987042	1.00042	0.987492			6.6	0.999505	0.993179	1.00456	1.00608	0.991918	0.998004	0.993957	0.997161	0.99957	0.999792	0.989412	1.00862	0.995603	1.00346	1.00696	1.00297	0.997161	1.00549	0.993906	1.00279
	6.7	0.992085	0.989637	0.981721	0.993011	0.995056	0.988421	0.99616	1.00002	0.98568	0.983776	0.990325	0.997674	1.00403	1.00051	0.999137	0.993124	0.98753	1.00315	0.995271	0.98242	0.984948	0.992762	0.981507			6.7	1.00128	0.994212	1.01264	1.00264	0.995258	1.00133	1.00108	1.0008	1.00469	1.00095	0.991765	1.01179	0.99664	0.996297	1.00582	1.00417	1.00182	1.00682	0.993906	1.00166
	6.8	0.991714	0.986659	0.982748	0.993011	1.00029	0.993979	0.99616	1.00002	0.983272	0.979546	0.989184	0.998568	0.997631	1.00161	0.993906	0.990869	0.990112	1.00201	0.995271	0.978659	0.982855	0.993855	0.987492			6.8	0.998277	1.00041	1.00456	1.00493	0.991918	0.999113	0.991922	1.0008	1.00162	1.00095	0.989412	1.0065	0.992491	0.991518	1.00582	1.00177	0.992507	1.00151	0.988976	1.00054
	6.9	0.991341	0.99063	0.987883	0.996032	0.998198	0.993052	0.995233	1.00002	0.98247	0.975317	0.985761	0.997674	0.999765	0.997204	1.00437	0.993124	0.988821	0.995156	0.992918	0.977719	0.981808	0.993855	0.982504			6.9	0.998657	1.00041	1.00961	1.00264	0.994144	0.999113	0.995992	1.00171	0.99957	0.997477	0.990588	1.00862	0.990417	0.997491	0.998974	0.998181	0.995997	1.00417	0.989962	0.999415
	7	0.990347	0.987652	0.984802	0.995025	0.996104	0.994905	0.998015	0.999033	0.980062	0.976163	0.985761	0.994094	1.00403	0.997204	0.999137	0.994251	0.988821	0.999726	0.987036	0.973019	0.977621	0.991669	0.983502			7	0.999817	1.00145	1.0086	1.00837	0.995258	1.00133	0.995992	1.0008	1.00162	1.00211	0.992941	1.00756	0.993529	0.996297	1.00125	1.00177	0.998324	1.00417	0.98799	0.997167
	7.1	0.989898	0.988644	0.986856	0.997039	0.990866	0.988421	0.998943	1.00496	0.983272	0.975317	0.986902	0.987831	0.996564	1.00051	0.995214	0.988615	0.988821	0.999726	0.987036	0.98148	0.982855	0.988389	0.979512			7.1	1.00073	0.997313	1.00557	1.00723	0.999711	1.00022	1.00006	0.999891	0.99957	0.997477	0.995294	1.01073	0.997677	1.00108	1.00125	1.00057	0.997161	1.00417	0.993906	1.00504
	7.2	0.988308	0.987652	0.982748	0.990996	0.991914	0.984715	0.993377	1.00199	0.975246	0.979546	0.986902	0.988726	1.0019	0.995003	0.999137	0.98636	0.986239	0.994013	0.990565	0.973959	0.977621	0.991669	0.982504			7.2	1.00015	0.996279	1.0086	1.00608	1.00194	0.999113	1.0021	0.999891	0.998547	0.998635	0.990588	1.00756	0.993529	1.00227	1.00011	1.00297	0.994834	1.00284	0.991934	1.00504
	7.3	0.987633	0.989637	0.977613	0.989989	0.992961	0.988421	0.993377	0.998045	0.979259	0.980392	0.986902	0.99141	1.00297	0.999406	1.00044	0.984106	0.982366	0.990585	0.984683	0.973019	0.977621	0.986202	0.978515			7.3	0.99805	0.99938	0.995477	0.994608	0.993031	0.998004	0.999044	0.996252	0.995478	0.999792	0.995294	1.00756	0.991454	1.00346	0.993272	0.995787	1.00182	1.00417	0.99292	1.00616
	7.4	0.987699	0.984674	0.977613	0.990996	0.991914	0.993979	0.997088	0.998045	0.981667	0.9787	0.986902	0.992305	0.99443	0.993902	0.997829	0.984106	0.986239	0.992871	0.981153	0.973019	0.982855	0.990575	0.978515			7.4	0.999447	1.00041	1.00658	1.00379	0.993031	0.995786	0.994974	1.0008	1.00059	0.998635	0.992941	1.00544	0.994566	1.00346	0.998974	1.00177	0.994834	1.00284	0.993906	1.00616
	7.5	0.986054	0.981696	0.976587	0.980925	0.986677	0.981936	0.990595	1.00199	0.978456	0.974471	0.989184	0.99141	1.00403	0.9906	1.00568	0.982978	0.983657	0.994013	0.984683	0.972079	0.979715	0.987295	0.974525			7.5	0.999357	0.994212	1.00153	1.00264	1.00082	0.998004	1.00006	0.996252	0.996501	0.994006	0.995294	1.00756	0.992491	1.00466	1.00125	0.999378	0.99367	1.00417	0.996864	1.00841
	7.6	0.986043	0.988644	0.980694	0.986968	0.990866	0.987494	0.987812	0.999033	0.972838	0.972779	0.985761	0.9932	0.998698	0.988399	0.993906	0.985233	0.986239	0.994013	0.984683	0.969258	0.977621	0.987295	0.981507			7.6	0.998648	0.998346	1.00153	1.00264	0.999711	1.00022	1.00006	0.995342	0.995478	0.99632	0.987059	1.00121	0.997677	1.00108	1.00239	1.00177	0.992507	1.00019	0.996864	1.00391
	7.7	0.985484	0.985667	0.976587	0.984954	0.986677	0.985641	0.989667	1.00002	0.972035	0.972779	0.98462	0.994989	0.99443	0.988399	0.995214	0.981851	0.986239	0.998583	0.984683	0.970198	0.979715	0.986202	0.981507			7.7	0.999226	0.997313	1.00456	0.996903	1.00082	1.00244	1.0021	0.994432	0.998547	0.995163	0.991765	1.00438	1.00079	1.00227	1.00125	0.996984	0.992507	1.00019	0.99785	1.00504
	7.8	0.984877	0.984674	0.977613	0.979918	0.984582	0.983789	0.990595	1.00002	0.972035	0.96855	0.982338	0.994094	1.00083	0.9895	0.997829	0.985233	0.986239	0.991728	0.987036	0.969258	0.979715	0.986202	0.975522			7.8	0.998129	1.00248	0.996487	1.00034	1.00082	0.999113	1.00006	0.997161	1.00366	0.995163	0.990588	1.00544	0.993529	0.990324	1.00125	0.998181	0.992507	0.997533	0.995878	1.00391
	7.9	0.98379	0.982689	0.97556	0.980925	0.984582	0.98101	0.990595	0.996071	0.97043	0.972779	0.983479	0.9932	1.00617	0.987298	1.00044	0.979596	0.984948	0.991728	0.98233	0.968318	0.976575	0.985109	0.969537			7.9	0.999432	1.00041	1.00355	1.00608	1.00194	1.00022	0.995992	0.991702	0.994455	0.998635	0.984706	1.00121	0.995603	0.998686	1.00239	0.999378	0.995997	1.00284	1.00475	1.01066
	8	0.982394	0.983681	0.976587	0.977904	0.983534	0.979157	0.986885	0.995084	0.97364	0.966858	0.980057	0.987831	1.00403	0.983996	0.999137	0.980724	0.984948	0.986015	0.981153	0.968318	0.976575	0.984015	0.97253			8	0.998095	0.997313	1.00557	1.00034	0.999711	1.00022	0.998026	0.989883	0.993432	0.995163	0.985882	1.00332	0.994566	0.993908	1.00239	0.999378	0.998324	1.00151	0.999823	1.00504
	8.1	0.982779	0.983681	0.976587	0.978911	0.984582	0.978231	0.987812	0.991135	0.97043	0.966858	0.981198	0.9932	1.00083	0.9895	1.00044	0.981851	0.983657	0.990585	0.9788	0.965498	0.975528	0.987295	0.974525			8.1	0.999561	0.996279	1.00456	1.00264	0.999711	1.00355	1.00108	0.998071	1.00059	0.998635	0.989412	1.00862	0.994566	0.997491	1.00125	1.00057	0.99367	1.00019	0.996864	1.00391
	8.2	0.982401	0.979711	0.973506	0.978911	0.982487	0.975452	0.987812	0.994097	0.972838	0.967704	0.98462	1.00125	0.998698	0.981795	0.993906	0.979596	0.984948	0.989443	0.981153	0.965498	0.976575	0.987295	0.975522			8.2	0.998116	1.00351	0.998506	1.00149	0.995258	1.00133	0.998026	0.988063	0.996501	1.00095	0.987059	1.00226	0.995603	0.995102	1.00011	0.999378	0.99367	0.998859	0.99785	1.01066
	8.3	0.981642	0.978718	0.971452	0.978911	0.982487	0.979157	0.989667	0.994097	0.968022	0.96432	0.975493	0.99141	0.997631	0.983996	0.999137	0.982978	0.98753	0.991728	0.983506	0.962677	0.974481	0.986202	0.97253			8.3	0.999809	0.99938	1.00961	1.00723	0.998597	1.00466	1.00311	0.993522	0.99957	1.00211	0.989412	1.00438	0.995603	0.993908	1.00125	1.00057	0.994834	0.99488	0.999823	1.00391
	8.4	0.981758	0.983681	0.974533	0.979918	0.985629	0.980083	0.986885	0.989161	0.97043	0.969396	0.977775	0.994989	0.995497	0.982896	0.995214	0.978469	0.984948	0.990585	0.977624	0.962677	0.974481	0.987295	0.97652			8.4	0.998418	1.00351	1.00153	1.01067	0.997484	1.00133	0.997009	0.995342	1.00162	0.997477	0.989412	1.00015	0.997677	0.995102	0.996693	0.99459	0.994834	0.99488	0.99785	1.00279
	8.5	0.980761	0.982689	0.974533	0.976897	0.983534	0.981936	0.978537	0.986199	0.969627	0.969396	0.975493	0.994094	0.999765	0.983996	1.00175	0.976215	0.981076	0.9883	0.981153	0.962677	0.969248	0.985109	0.974525			8.5	1	0.998346	1.0086	1.01182	1.00305	1.00355	1.00108	0.993522	1.00162	0.998635	0.992941	1.0065	0.998714	1.00108	0.997833	0.998181	0.989016	0.989574	0.999823	1.00616
	8.6	0.979424	0.974748	0.970425	0.978911	0.980392	0.977304	0.974827	0.985212	0.971232	0.967704	0.973211	0.994094	0.999765	0.977392	0.996521	0.979596	0.983657	0.987158	0.9788	0.964558	0.970295	0.984015	0.977517			8.6	0.998945	1.00041	0.998506	1.00493	0.998597	1.00133	1.00311	0.990793	1.00059	0.999792	0.990588	1.0065	0.99664	0.996297	0.998974	1.00057	0.992507	0.996206	1.00081	1.00279
	8.7	0.978453	0.980704	0.974533	0.976897	0.982487	0.980083	0.972044	0.990148	0.965614	0.960937	0.969788	0.99141	0.998698	0.980694	0.999137	0.97396	0.977203	0.986015	0.974095	0.962677	0.970295	0.984015	0.974525			8.7	1.00141	1.00248	1.00658	1.01182	1.00305	1.00244	0.999044	0.998981	0.99957	1.00095	0.988235	1.00862	1.00183	1.00227	1.00239	1.00177	0.998324	0.998859	0.996864	1.00279
	8.8	0.979173	0.978718	0.972479	0.974883	0.982487	0.982862	0.973899	0.984225	0.964811	0.966012	0.977775	0.9932	0.996564	0.979594	0.996521	0.980724	0.979785	0.9883	0.977624	0.964558	0.969248	0.984015	0.973527			8.8	0.999089	1.00145	1.00961	1.00493	0.999711	1.00244	0.998026	0.998071	1.00264	1.00442	0.988235	1.00438	0.998714	0.992713	0.997833	0.998181	0.992507	0.996206	0.990948	1.00166
	8.9	0.97835	0.978718	0.972479	0.971861	0.979345	0.981936	0.971117	0.985212	0.965614	0.965166	0.973211	0.9932	0.998698	0.980694	0.999137	0.978469	0.982366	0.987158	0.976448	0.965498	0.968201	0.979642	0.969537			8.9	0.999479	1.00351	1.01163	1.00723	0.997484	1.00022	1.00006	0.995342	0.994455	1.00095	0.991765	1.00862	1.00079	0.998686	0.998974	0.999378	0.991343	0.996206	0.99292	1.00054
	9	0.978881	0.978718	0.972479	0.969847	0.980392	0.98101	0.972972	0.981263	0.964008	0.96855	0.978916	0.997674	0.997631	0.979594	0.996521	0.978469	0.977203	0.990585	0.977624	0.968318	0.971341	0.980735	0.971532			9	0.999561	0.997313	1.00557	1.00608	0.999711	1.00133	0.998026	0.994432	1.00059	0.994006	0.990588	1.00967	0.998714	0.999881	0.997833	0.998181	0.998324	0.997533	0.998837	1.00504
	9.1	0.976543	0.977726	0.971452	0.96884	0.975155	0.976378	0.971117	0.977314	0.95839	0.959245	0.973211	0.994094	0.998698	0.980694	0.997829	0.977342	0.983657	0.986015	0.9788	0.964558	0.969248	0.979642	0.96455			9.1	0.999942	1.00661	1.00254	1.00379	1.00082	1.00577	1.00108	0.990793	0.994455	0.999792	0.991765	1.00862	0.995603	0.997491	1.00354	1.00177	0.994834	0.998859	0.996864	1.00391
	9.2	0.976151	0.978718	0.97556	0.967833	0.975155	0.979157	0.969262	0.972379	0.9616	0.96432	0.975493	0.995884	0.998698	0.978493	0.996521	0.978469	0.975912	0.98373	0.974095	0.961737	0.968201	0.978548	0.965548			9.2	0.998886	1.00145	1.00355	1.00723	0.997484	1.00244	0.997009	0.994432	0.996501	0.99632	0.990588	1.00756	0.99664	0.999881	1.00011	0.99459	0.995997	0.997533	0.99785	1.00166
	9.3	0.975157	0.976733	0.972479	0.967833	0.972013	0.974525	0.962769	0.976327	0.963206	0.963474	0.97207	0.9932	0.99443	0.978493	0.992598	0.976215	0.979785	0.980303	0.974095	0.963618	0.968201	0.978548	0.97253			9.3	0.998188	1.00351	1.00153	1.01411	0.997484	1.00244	1.0021	0.991702	0.998547	0.999792	0.989412	1.00544	0.994566	0.997491	0.996693	0.99459	0.989016	0.993553	0.991934	1.00166
	9.4	0.975272	0.976733	0.971452	0.966826	0.970965	0.975452	0.966479	0.973366	0.964811	0.966858	0.97207	0.99141	0.992296	0.978493	0.995214	0.978469	0.983657	0.98373	0.972918	0.963618	0.969248	0.976362	0.965548			9.4	0.998852	0.99938	1.00456	1.01182	0.997484	1.00022	0.999044	0.993522	0.996501	0.998635	0.990588	1.00438	0.99664	1.00108	1.00468	1.00177	0.992507	0.99488	0.989962	1.00054
	9.5	0.974922	0.976733	0.973506	0.970854	0.970965	0.978231	0.967407	0.973366	0.95839	0.962628	0.966365	0.988726	0.995497	0.976292	0.993906	0.976215	0.984948	0.98373	0.976448	0.961737	0.967154	0.979642	0.965548			9.5	0.998418	1.00351	0.999515	0.999197	0.997484	0.999113	0.994974	0.990793	0.998547	1.00095	0.990588	1.00967	0.993529	0.998686	1.00582	1.00177	0.995997	0.996206	0.991934	1.00166
	9.6	0.973411	0.970777	0.967344	0.969847	0.972013	0.975452	0.962769	0.971391	0.959995	0.96855	0.968647	0.989621	0.991229	0.97299	0.99129	0.981851	0.977203	0.984873	0.9788	0.961737	0.966108	0.971988	0.96056			9.6	0.999163	1.00145	1.00153	1.00723	1.00082	1.00022	0.995992	0.993522	0.996501	0.998635	0.991765	1.00756	0.995603	0.999881	1.00696	0.999378	0.99367	0.997533	0.991934	1.00391
	9.7	0.973862	0.976733	0.972479	0.966826	0.970965	0.977304	0.959987	0.972379	0.967219	0.965166	0.973211	0.985147	0.990162	0.976292	0.989982	0.975087	0.982366	0.978017	0.9788	0.957977	0.962968	0.976362	0.969537			9.7	0.998301	1.00041	1.00053	1.00723	0.995258	0.994677	0.991922	0.999891	0.998547	0.998635	0.990588	1.00756	0.992491	1.00108	1.00125	0.995787	0.992507	0.996206	0.995878	1.00728
	9.8	0.973685	0.978718	0.970425	0.967833	0.969918	0.976378	0.959059	0.96843	0.968824	0.965166	0.969788	0.986042	0.991229	0.980694	0.996521	0.975087	0.981076	0.980303	0.970565	0.957037	0.965061	0.976362	0.966545			9.8	0.998849	1.00351	0.997496	1.00723	0.998597	1.00022	0.999044	0.990793	0.991385	0.995163	0.990588	1.00967	0.99664	1.00108	1.00125	1.00057	0.997161	1.00019	0.995878	1.00166
	9.9	0.973311	0.97574	0.971452	0.960783	0.965728	0.968041	0.963697	0.973366	0.964008	0.961782	0.969788	0.986042	0.993363	0.980694	1.00044	0.97396	0.977203	0.982588	0.975271	0.957977	0.966108	0.975268	0.969537			9.9	0.998492	0.99938	1.00759	1.00379	0.999711	0.996895	0.99294	0.993522	0.991385	0.997477	0.991765	1.00967	0.992491	0.997491	1.00582	1.00057	0.997161	0.99488	0.994892	1.00391
	10	0.972801	0.97574	0.969398	0.967833	0.969918	0.973599	0.958132	0.976327	0.959995	0.955861	0.974352	0.985147	0.990162	0.976292	0.996521	0.970578	0.978494	0.97916	0.976448	0.960797	0.965061	0.975268	0.966545			10	0.999034	1.00248	1.00456	1.00493	0.998597	1.00133	1.00006	0.991702	0.988316	0.997477	0.989412	1.00862	0.992491	0.997491	1.00239	1.00297	0.999488	1.00151	0.993906	1.00391
	10.1	0.973497	0.974748	0.972479	0.965819	0.969918	0.976378	0.961842	0.971391	0.966416	0.961782	0.968647	0.982462	0.99443	0.980694	0.999137	0.975087	0.981076	0.975732	0.976448	0.960797	0.961921	0.974175	0.965548			10.1	0.999105	1.00041	1.00254	1.00608	1.00194	1.00355	1.0021	0.992612	0.989339	1.00442	0.988235	1.01285	0.995603	0.998686	1.00239	0.998181	0.994834	0.998859	0.990948	0.999415
	10.2	0.971905	0.974748	0.969398	0.965819	0.965728	0.974525	0.959987	0.971391	0.9616	0.958399	0.970929	0.986042	0.992296	0.978493	0.995214	0.97396	0.981076	0.97916	0.970565	0.955157	0.962968	0.970895	0.963553			10.2	0.99881	0.996279	0.998506	1.00379	0.991918	0.996895	0.99294	0.995342	0.994455	1.00211	0.989412	1.01285	0.993529	0.999881	1.00696	1.00417	0.998324	0.998859	0.993906	1.00728
	10.3	0.971839	0.97177	0.968371	0.970854	0.965728	0.973599	0.962769	0.965468	0.960798	0.962628	0.964084	0.977989	0.991229	0.978493	0.996521	0.97396	0.979785	0.97916	0.975271	0.963618	0.966108	0.968708	0.963553			10.3	0.998642	0.998346	1.00254	1.00493	0.997484	0.999113	0.994974	0.997161	0.994455	0.998635	0.987059	1.00756	0.993529	1.00227	1.00468	0.998181	0.99018	0.99488	0.999823	1.00841
	10.4	0.971984	0.981696	0.969398	0.970854	0.967823	0.975452	0.958132	0.964481	0.959995	0.960091	0.965225	0.979778	0.993363	0.976292	0.993906	0.976215	0.981076	0.976875	0.970565	0.960797	0.961921	0.974175	0.965548			10.4	1.00014	0.994212	1.00961	1.00723	0.998597	0.999113	0.993957	0.996252	0.995478	1.00211	0.991765	1.01179	0.994566	1.00227	1.00468	1.00177	0.997161	1.00151	0.99785	1.00279
	10.5	0.971181	0.980704	0.967344	0.967833	0.963633	0.969893	0.961842	0.962507	0.964008	0.958399	0.969788	0.979778	0.992296	0.980694	0.987367	0.97396	0.978494	0.976875	0.974095	0.958917	0.964014	0.971988	0.961558			10.5	0.998559	0.997313	1.00557	1.00034	0.994144	0.999113	0.994974	0.997161	0.995478	1.00095	0.985882	1.0065	0.992491	0.999881	1.00696	0.999378	0.997161	1.00151	0.993906	1.00391
	10.6	0.971448	0.976733	0.967344	0.963804	0.962586	0.968041	0.961842	0.966455	0.963206	0.961782	0.965225	0.980673	0.991229	0.982896	0.989982	0.977342	0.979785	0.978017	0.969389	0.960797	0.966108	0.973082	0.965548			10.6	0.999363	0.995246	1.00658	1.00034	0.997484	1.00133	0.993957	0.997161	0.993432	1.00095	0.990588	1.00967	0.993529	0.997491	1.00468	1.00297	0.997161	0.997533	0.994892	1.01291
	10.7	0.97092	0.980704	0.968371	0.965819	0.962586	0.969893	0.959059	0.965468	0.960798	0.960091	0.965225	0.979778	0.993363	0.980694	0.99129	0.970578	0.978494	0.975732	0.971742	0.959857	0.962968	0.974175	0.963553			10.7	0.997661	0.994212	1.00456	0.99805	0.997484	0.999113	0.995992	0.998981	0.993432	0.997477	0.988235	1.00544	0.990417	0.995102	1.00354	1.00057	0.994834	0.996206	0.996864	1.00504
	10.8	0.970312	0.979711	0.969398	0.963804	0.962586	0.969893	0.955349	0.966455	0.962403	0.960937	0.965225	0.977094	0.993363	0.976292	0.993906	0.976215	0.977203	0.97459	0.968213	0.960797	0.962968	0.970895	0.959563			10.8	0.998446	0.996279	1.00759	0.996903	0.997484	0.996895	0.993957	0.995342	0.993432	0.998635	0.992941	1.00756	0.98938	0.998686	1.0081	1.00177	0.994834	0.997533	0.995878	1.00728
	10.9	0.968819	0.977726	0.96221	0.962797	0.960491	0.97082	0.953494	0.965468	0.957587	0.958399	0.95952	0.97083	0.99443	0.975191	0.989982	0.97396	0.983657	0.97459	0.970565	0.957037	0.959827	0.970895	0.96455			10.9	0.998921	0.99938	0.999515	1.00837	0.998597	0.999113	0.995992	0.996252	0.992409	1.00095	0.990588	1.00756	0.991454	0.995102	1.00125	0.999378	0.998324	0.998859	0.996864	1.00953
	11	0.967723	0.977726	0.965291	0.965819	0.960491	0.961556	0.954422	0.961519	0.960798	0.955015	0.964084	0.974409	0.989095	0.977392	0.986059	0.971706	0.974621	0.976875	0.969389	0.959857	0.958781	0.965428	0.959563			11	0.998768	0.997313	1.00254	1.00837	1.00194	0.996895	0.995992	0.996252	0.994455	0.999792	0.989412	1.00226	0.995603	1.00108	1.00125	1.00177	0.99367	0.993553	0.994892	1.00953
	11.1	0.968341	0.974748	0.96221	0.96179	0.961538	0.964335	0.954422	0.962507	0.957587	0.955015	0.961802	0.982462	0.993363	0.983996	0.986059	0.975087	0.981076	0.973447	0.967036	0.958917	0.959827	0.968708	0.957568			11.1	0.998221	0.998346	0.995477	1.00379	0.999711	1.00022	0.998026	0.998981	0.995478	0.997477	0.988235	1.00967	0.992491	0.998686	1.00468	0.998181	0.99367	0.9909	0.994892	1.00728
	11.2	0.968781	0.978718	0.966318	0.962797	0.961538	0.963409	0.953494	0.963494	0.959995	0.957553	0.957238	0.977094	0.995497	0.982896	0.987367	0.97396	0.978494	0.973447	0.967036	0.961737	0.961921	0.967615	0.961558			11.2	0.997856	0.998346	1.00053	1.00264	0.998597	0.996895	0.997009	1.00262	0.996501	0.997477	0.988235	1.0065	0.991454	0.996297	1.00125	1.00057	0.991343	0.992227	0.996864	1.00391
	11.3	0.966983	0.972763	0.963237	0.964812	0.962586	0.967114	0.949784	0.961519	0.956784	0.94994	0.958379	0.97083	0.995497	0.978493	0.989982	0.972833	0.975912	0.968877	0.968213	0.958917	0.960874	0.968708	0.957568			11.3	0.999164	0.997313	1.00557	1.00379	0.998597	0.998004	0.99294	1.0008	0.997524	0.998635	0.987059	1.00967	0.995603	0.997491	1.00125	1.00177	0.998324	0.998859	0.995878	1.00504
	11.4	0.966467	0.97574	0.961183	0.95474	0.955254	0.962483	0.953494	0.965468	0.953573	0.954169	0.95952	0.976199	0.99443	0.978493	0.99129	0.97396	0.978494	0.968877	0.967036	0.956097	0.960874	0.964335	0.95657			11.4	0.998356	1.00041	1.00456	1.00149	0.999711	0.995786	0.993957	0.994432	0.992409	1.00095	0.990588	1.00438	0.990417	0.996297	1.00239	0.996984	0.997161	0.996206	0.998837	1.01178
	11.5	0.966811	0.979711	0.96221	0.963804	0.956301	0.967114	0.953494	0.965468	0.955179	0.946556	0.962943	0.975304	0.990162	0.97299	0.987367	0.97396	0.977203	0.97002	0.96586	0.956097	0.959827	0.968708	0.959563			11.5	0.998461	0.997313	1.00153	1.00264	1.00194	1.00022	0.997009	1.0008	0.996501	0.997477	0.983529	1.0065	0.98938	0.998686	0.998974	0.996984	0.998324	0.997533	0.995878	1.00953
	11.6	0.966131	0.973755	0.958102	0.958769	0.956301	0.965262	0.955349	0.961519	0.955179	0.94994	0.965225	0.969936	0.993363	0.979594	0.989982	0.972833	0.978494	0.972305	0.963507	0.959857	0.958781	0.963242	0.953578			11.6	0.996667	0.998346	0.999515	0.999197	0.998597	0.996895	0.989887	0.996252	0.994455	0.994006	0.988235	1.00226	0.992491	0.998686	0.997833	0.992196	0.995997	0.997533	0.995878	1.00841
	11.7	0.964663	0.974748	0.958102	0.959776	0.956301	0.962483	0.947929	0.960532	0.951165	0.948248	0.964084	0.969936	0.990162	0.97299	0.988675	0.970578	0.978494	0.968877	0.96586	0.956097	0.955641	0.964335	0.957568			11.7	0.999629	1.00041	1.00254	1.00149	1.00416	1.00022	0.993957	0.995342	1.00059	0.999792	0.991765	1.00756	0.991454	1.00108	1.00239	0.996984	0.997161	0.997533	0.99785	1.01066
	11.8	0.964663	0.9678	0.955022	0.956755	0.958396	0.967114	0.947929	0.957571	0.953573	0.951632	0.965225	0.968146	0.988028	0.978493	0.988675	0.968324	0.97333	0.973447	0.964683	0.959857	0.958781	0.963242	0.95657			11.8	0.998981	0.99938	1.00053	1.00264	1.00082	1.00133	0.995992	0.996252	1.00162	0.995163	0.988235	1.00544	0.991454	1.00227	1.00239	0.998181	0.995997	0.997533	0.995878	1.00953
	11.9	0.964795	0.965814	0.955022	0.962797	0.959444	0.965262	0.948856	0.955596	0.94956	0.950786	0.964084	0.963672	0.990162	0.976292	0.987367	0.971706	0.983657	0.973447	0.967036	0.955157	0.956687	0.966522	0.95657			11.9	0.999011	1.00248	1.00153	1.00034	1.00305	1.00133	0.998026	0.998981	0.998547	0.998635	0.988235	1.00438	0.988343	0.993908	1.00582	1.00177	0.992507	0.993553	0.996864	1.01291
	12	0.965845	0.97177	0.956048	0.960783	0.959444	0.968041	0.952566	0.960532	0.94956	0.954169	0.968647	0.966356	0.991229	0.97409	0.986059	0.969451	0.974621	0.97002	0.969389	0.959857	0.960874	0.966522	0.958565			12	0.998141	1.00455	1.00759	1.00608	1.00305	0.996895	0.99294	0.998071	0.996501	0.995163	0.989412	1.0065	0.987306	0.991518	1.00125	0.999378	0.997161	0.992227	0.99292	1.00616
	12.1	0.964489	0.972763	0.958102	0.957762	0.959444	0.961556	0.954422	0.960532	0.951968	0.94994	0.960661	0.961883	0.992296	0.976292	0.987367	0.970578	0.977203	0.966592	0.964683	0.957037	0.956687	0.965428	0.955573			12.1	0.99884	1.00351	1.00053	1.00493	1.00639	1.00133	0.997009	0.997161	0.997524	0.997477	0.988235	1.00756	0.991454	0.998686	1.00125	1.00057	0.995997	0.99488	0.99292	1.00054
	12.2	0.964399	0.972763	0.959129	0.964812	0.960491	0.959704	0.949784	0.962507	0.948757	0.954169	0.964084	0.965462	0.989095	0.976292	0.984751	0.967196	0.977203	0.967735	0.96233	0.955157	0.955641	0.962148	0.957568			12.2	0.999133	1.00351	1.00153	1.00264	1.00305	1.00244	0.995992	0.998981	0.998547	0.998635	0.987059	1.00756	0.992491	0.997491	1.00239	0.996984	0.991343	0.996206	0.994892	1.01178
	12.3	0.963726	0.968792	0.958102	0.960783	0.960491	0.965262	0.942364	0.962507	0.947955	0.94994	0.960661	0.959198	0.988028	0.977392	0.984751	0.970578	0.975912	0.967735	0.96586	0.957977	0.958781	0.964335	0.954575			12.3	0.997954	1.00145	0.998506	1.00149	1.00194	1.00355	0.999044	0.997161	0.996501	0.99632	0.983529	1.00756	0.993529	0.995102	0.997833	0.996984	0.994834	0.992227	0.99292	1.01066
	12.4	0.962487	0.969785	0.956048	0.96179	0.959444	0.961556	0.943291	0.95066	0.946349	0.94994	0.95952	0.960093	0.988028	0.976292	0.984751	0.967196	0.975912	0.966592	0.968213	0.957037	0.956687	0.959962	0.955573			12.4	0.998177	1.00351	0.997496	1.00493	1.00305	1.00355	0.997009	0.999891	0.995478	0.998635	0.984706	1.00438	0.992491	0.993908	0.996693	0.996984	0.995997	0.992227	0.994892	1.00953
	12.5	0.962652	0.962836	0.955022	0.957762	0.957349	0.96063	0.949784	0.954609	0.952771	0.950786	0.961802	0.962777	0.989095	0.979594	0.987367	0.969451	0.978494	0.964307	0.96233	0.951396	0.955641	0.959962	0.954575			12.5	0.998716	0.99938	1.00053	1.00837	1.00082	0.999113	0.99294	0.998071	0.99957	0.992849	0.985882	1.01285	0.990417	0.993908	0.998974	1.00177	1.00065	0.996206	0.994892	1.00841
	12.6	0.962345	0.970777	0.956048	0.951719	0.956301	0.955998	0.947001	0.963494	0.946349	0.950786	0.95952	0.962777	0.992296	0.976292	0.987367	0.970578	0.977203	0.964307	0.961154	0.952336	0.955641	0.961055	0.95258			12.6	0.996679	0.99938	0.991438	0.99805	1.00194	0.999113	0.993957	0.993522	0.996501	0.995163	0.984706	1.00756	0.988343	0.993908	0.998974	0.999378	0.991343	0.9909	0.999823	1.01291
	12.7	0.96264	0.9678	0.953995	0.955748	0.957349	0.96063	0.945146	0.963494	0.947955	0.951632	0.962943	0.964567	0.988028	0.97409	0.989982	0.969451	0.979785	0.963164	0.959977	0.955157	0.955641	0.959962	0.951583			12.7	0.997109	1.00041	0.997496	1.00608	0.997484	0.998004	0.991922	0.991702	0.993432	0.997477	0.983529	1.00438	0.992491	0.992713	0.998974	0.998181	0.997161	0.9909	0.999823	1.01291
	12.8	0.96208	0.963829	0.952968	0.957762	0.959444	0.96063	0.944219	0.957571	0.954376	0.953324	0.964084	0.960093	0.988028	0.97299	0.982136	0.968324	0.974621	0.971162	0.96233	0.955157	0.955641	0.954495	0.95258			12.8	0.996943	1.00145	0.994467	1.00034	0.998597	0.999113	0.99294	0.996252	0.995478	0.998635	0.988235	1.00862	0.986269	0.989129	0.997833	0.999378	0.99367	0.9909	0.998837	1.01178
	12.9	0.963459	0.964822	0.953995	0.956755	0.959444	0.958777	0.944219	0.956584	0.944744	0.955861	0.967506	0.960988	0.991229	0.981795	0.987367	0.970578	0.979785	0.968877	0.970565	0.954216	0.953547	0.958868	0.955573			12.9	0.997664	1.00248	0.994467	1.00837	0.996371	1.00022	0.993957	0.996252	0.993432	0.998635	0.985882	1.01285	0.98938	0.992713	1.00125	1.00177	0.995997	0.992227	0.990948	1.00841
	13	0.961914	0.966807	0.953995	0.95474	0.957349	0.955072	0.943291	0.958558	0.948757	0.944019	0.95952	0.959198	0.990162	0.982896	0.987367	0.967196	0.982366	0.963164	0.968213	0.951396	0.956687	0.957775	0.953578			13	0.999321	1.00558	0.999515	1.00608	0.999711	0.994677	0.987853	0.999891	0.998547	1.00095	0.987059	1.01497	0.993529	0.995102	1.00239	0.998181	0.997161	0.99488	0.995878	1.01515
	13.1	0.96139	0.958866	0.950914	0.956755	0.952112	0.955072	0.946074	0.954609	0.947955	0.953324	0.964084	0.960988	0.993363	0.978493	0.988675	0.967196	0.977203	0.964307	0.96233	0.954216	0.956687	0.957775	0.949588			13.1	0.999605	1.00558	0.999515	1.00723	1.00082	1.00133	0.999044	0.998981	0.998547	1.00442	0.983529	1.01602	0.98938	0.991518	1.00125	0.996984	0.995997	0.993553	0.995878	1.01291
	13.2	0.961144	0.962836	0.953995	0.952726	0.953159	0.95044	0.942364	0.960532	0.950363	0.951632	0.962943	0.962777	0.991229	0.976292	0.987367	0.970578	0.978494	0.965449	0.957625	0.950456	0.951454	0.958868	0.953578			13.2	0.998835	1.00455	0.998506	1.00952	1.00082	1.00022	0.995992	0.996252	1.00162	1.00095	0.984706	1.00332	0.992491	0.990324	0.998974	1.00177	0.99367	0.9909	0.995878	1.0174
	13.3	0.961395	0.961844	0.953995	0.955748	0.954206	0.956924	0.940509	0.958558	0.945547	0.950786	0.962943	0.963672	0.991229	0.978493	0.987367	0.969451	0.978494	0.968877	0.959977	0.950456	0.955641	0.953401	0.95258			13.3	0.998846	1.00351	0.996487	1.01296	0.999711	0.998004	0.994974	0.994432	1.00264	0.99632	0.987059	1.01285	0.988343	0.993908	1.00125	1.00297	0.995997	0.992227	0.994892	1.00953
	13.4	0.961101	0.960851	0.955022	0.955748	0.956301	0.954145	0.940509	0.955596	0.948757	0.944865	0.966365	0.961883	0.990162	0.976292	0.984751	0.969451	0.975912	0.968877	0.964683	0.952336	0.953547	0.955588	0.95258			13.4	0.999169	0.99938	1.00153	1.01296	1.00416	1.00133	0.995992	0.989883	0.994455	0.998635	0.990588	1.01285	0.991454	0.996297	1.00011	0.996984	0.995997	0.989574	0.996864	1.01515
	13.5	0.960302	0.959859	0.951941	0.951719	0.952112	0.948587	0.939581	0.955596	0.946349	0.94994	0.960661	0.961883	0.991229	0.979594	0.989982	0.969451	0.978494	0.966592	0.96233	0.954216	0.953547	0.953401	0.949588			13.5	0.999444	0.995246	0.997496	1.00379	0.994144	0.998004	0.99294	0.997161	1.00366	1.00095	0.989412	1.00967	0.995603	0.998686	1.00354	1.00177	0.999488	0.99488	0.99785	1.01515
	13.6	0.959955	0.959859	0.953995	0.953733	0.952112	0.954145	0.941436	0.953622	0.945547	0.949094	0.958379	0.960988	0.988028	0.979594	0.984751	0.967196	0.977203	0.968877	0.956448	0.953276	0.955641	0.954495	0.950586			13.6	0.998345	0.995246	1.00153	0.992314	0.997484	0.999113	0.995992	0.993522	0.994455	0.999792	0.987059	1.01285	0.995603	0.998686	1.00582	1.00177	0.997161	0.99488	0.996864	1.00841
	13.7	0.958758	0.961844	0.951941	0.947691	0.953159	0.951366	0.939581	0.952635	0.943941	0.948248	0.964084	0.960988	0.984827	0.977392	0.989982	0.964942	0.974621	0.963164	0.961154	0.948576	0.951454	0.954495	0.946596			13.7	0.997791	0.995246	0.998506	0.993461	0.995258	0.995786	0.990905	0.998981	0.997524	1.00095	0.989412	1.01391	0.992491	0.995102	1.00011	1.00177	0.999488	0.9909	0.999823	1.00841
	13.8	0.960028	0.955888	0.950914	0.95474	0.955254	0.957851	0.941436	0.952635	0.941533	0.939789	0.95952	0.960988	0.990162	0.976292	0.987367	0.967196	0.974621	0.97002	0.958801	0.952336	0.955641	0.961055	0.95657			13.8	0.997869	0.995246	0.993458	0.993461	0.998597	0.993568	0.999044	0.997161	0.995478	0.999792	0.990588	1.01497	0.993529	0.997491	1.00125	0.995787	0.994834	0.989574	1.00278	1.01291
	13.9	0.958741	0.956881	0.950914	0.952726	0.950017	0.951366	0.939581	0.952635	0.948757	0.949094	0.954956	0.955619	0.98376	0.980694	0.984751	0.966069	0.974621	0.966592	0.967036	0.946696	0.951454	0.954495	0.953578			13.9	0.998158	0.993179	1.00254	0.996903	0.997484	0.999113	0.991922	0.997161	0.993432	1.00095	0.991765	1.01285	0.991454	0.996297	1.00125	0.998181	0.997161	0.9909	1.00179	1.01066
	14	0.959251	0.960851	0.953995	0.950712	0.954206	0.959704	0.935871	0.954609	0.942336	0.946556	0.960661	0.95383	0.985894	0.97299	0.986059	0.969451	0.974621	0.967735	0.959977	0.948576	0.951454	0.958868	0.954575			14	0.997442	0.989045	1.00053	1.00264	0.997484	0.994677	0.991922	0.999891	0.994455	0.998635	0.987059	1.00862	0.994566	0.998686	0.996693	0.996984	0.997161	0.9909	1.00081	1.01066
	14.1	0.958462	0.960851	0.956048	0.948698	0.952112	0.951366	0.937726	0.948686	0.944744	0.944865	0.957238	0.957409	0.98376	0.971889	0.99129	0.967196	0.970748	0.967735	0.96586	0.950456	0.952501	0.953401	0.951583			14.1	0.995238	0.994212	0.98841	0.993461	0.996371	0.995786	0.983783	0.998071	0.994455	0.997477	0.988235	1.00967	0.986269	0.991518	1.00239	0.999378	0.992507	0.989574	1.00179	1.00616
	14.2	0.959466	0.962836	0.956048	0.952726	0.953159	0.955072	0.937726	0.954609	0.935112	0.948248	0.958379	0.955619	0.989095	0.979594	0.987367	0.964942	0.975912	0.968877	0.96586	0.951396	0.952501	0.955588	0.947593			14.2	0.997358	0.996279	0.993458	0.994608	0.995258	0.99246	0.986835	1.00262	0.998547	0.994006	0.988235	1.00967	0.994566	0.995102	1.00354	0.995787	1.00182	1.00019	1.00179	1.00504
	14.3	0.957945	0.959859	0.956048	0.95474	0.951064	0.953219	0.938654	0.953622	0.939125	0.943173	0.957238	0.959198	0.982693	0.97409	0.980828	0.962687	0.974621	0.967735	0.961154	0.950456	0.950407	0.955588	0.948591			14.3	0.997315	0.992146	0.992448	0.999197	0.996371	0.994677	0.99294	0.996252	0.996501	0.995163	0.985882	1.00862	0.990417	0.993908	1.00011	0.995787	1.00298	1.00019	1.00475	1.01066
	14.4	0.957825	0.960851	0.956048	0.948698	0.946874	0.949514	0.943291	0.954609	0.934309	0.944865	0.956097	0.956514	0.98376	0.976292	0.989982	0.966069	0.974621	0.962022	0.96586	0.949516	0.94936	0.953401	0.949588			14.4	0.997713	0.996279	0.996487	0.995755	0.996371	0.995786	0.991922	0.995342	0.997524	0.99632	0.982353	1.00756	0.992491	0.999881	1.00125	0.995787	1.00182	1.00019	1.00278	1.01066
	14.5	0.957065	0.963829	0.959129	0.949705	0.945827	0.953219	0.933088	0.955596	0.936717	0.941481	0.958379	0.955619	0.982693	0.975191	0.988675	0.964942	0.970748	0.963164	0.963507	0.945755	0.947267	0.952308	0.948591			14.5	0.997696	0.996279	1.00053	0.996903	0.996371	0.995786	0.989887	0.998071	1.00264	0.995163	0.982353	1.0065	0.990417	0.998686	1.00125	0.996984	0.999488	0.998859	1.00278	1.00728
	14.6	0.957597	0.961844	0.959129	0.946684	0.945827	0.954145	0.935871	0.951648	0.936717	0.94571	0.952674	0.952935	0.984827	0.976292	0.989982	0.964942	0.972039	0.968877	0.959977	0.948576	0.951454	0.953401	0.953578			14.6	0.997206	0.988012	0.991438	1.00149	0.997484	0.993568	0.987853	0.993522	1.00162	0.995163	0.982353	1.00544	0.99664	0.999881	1.00011	0.993393	1.00182	1.00284	1.00475	1.00953
	14.7	0.956581	0.963829	0.958102	0.946684	0.941637	0.941176	0.938654	0.95066	0.939125	0.944019	0.956097	0.951145	0.98376	0.97299	0.987367	0.963815	0.969458	0.97002	0.967036	0.944815	0.950407	0.953401	0.950586			14.7	0.99621	0.989045	0.992448	0.992314	0.994144	0.993568	0.987853	0.997161	0.99957	0.994006	0.981176	1.00226	0.993529	0.999881	1.00011	0.992196	1.00414	1.00549	1.00179	1.00728
	14.8	0.955387	0.961844	0.943726	0.950712	0.947922	0.953219	0.927523	0.953622	0.935915	0.944019	0.953815	0.950251	0.98376	0.967486	0.982136	0.960433	0.97333	0.965449	0.96233	0.947636	0.950407	0.953401	0.949588			14.8	0.996393	0.990079	0.991438	0.99002	0.995258	0.99246	0.987853	0.994432	0.998547	0.994006	0.983529	1.0065	0.998714	1.00227	0.995553	0.996984	1.00531	1.00549	0.996864	1.00616
	14.9	0.954915	0.961844	0.942699	0.950712	0.945827	0.95044	0.933088	0.946712	0.934309	0.940635	0.956097	0.952935	0.982693	0.97409	0.983444	0.966069	0.972039	0.965449	0.963507	0.946696	0.948314	0.947935	0.942606			14.9	0.998487	0.990079	0.999515	0.993461	0.997484	0.993568	0.99294	0.990793	1.00264	0.999792	0.981176	1.00226	1.00079	0.999881	1.00239	1.00057	1.00531	1.00417	1.00377	1.01066
	15	0.955618	0.949932	0.950914	0.949705	0.945827	0.951366	0.938654	0.954609	0.932704	0.947402	0.956097	0.950251	0.977359	0.975191	0.986059	0.964942	0.974621	0.964307	0.96586	0.944815	0.945174	0.951215	0.946596			15	0.996812	0.992146	0.98841	0.995755	0.998597	0.994677	0.98887	0.986244	1.00162	0.994006	0.984706	1.00438	0.998714	0.999881	1.00239	0.993393	1.00182	1.00151	1.00278	1.00953
	15.1	0.953711	0.946955	0.947833	0.947691	0.943732	0.95044	0.935871	0.956584	0.931901	0.939789	0.958379	0.95204	0.979493	0.968587	0.988675	0.959306	0.97333	0.957452	0.961154	0.944815	0.945174	0.946841	0.945598			15.1	0.99649	0.993179	0.996487	0.994608	0.997484	0.991351	0.984801	0.991702	1.00571	0.994006	0.978824	1.00121	0.993529	0.996297	1.00239	0.995787	1.00182	0.998859	1.00574	1.00953
	15.2	0.9539	0.957873	0.947833	0.949705	0.945827	0.947661	0.936799	0.951648	0.93752	0.933868	0.958379	0.95383	0.979493	0.965285	0.986059	0.960433	0.974621	0.958594	0.961154	0.946696	0.947267	0.944655	0.940611			15.2	0.997485	0.993179	1.00456	1.00149	0.997484	0.988024	0.98887	0.991702	0.99957	0.99632	0.981176	1.00438	0.995603	0.997491	0.996693	0.993393	1.00182	0.998859	1.0087	1.01291
	15.3	0.954068	0.958866	0.949887	0.948698	0.942685	0.952293	0.937726	0.954609	0.932704	0.939789	0.954956	0.951145	0.976292	0.970788	0.982136	0.96156	0.972039	0.965449	0.956448	0.945755	0.94622	0.946841	0.942606			15.3	0.996923	0.992146	0.996487	1.00034	0.996371	0.991351	0.982766	0.993522	0.998547	0.990534	0.982353	1.00756	0.99664	0.997491	0.997833	0.99459	0.998324	0.998859	1.01067	1.01515
	15.4	0.954969	0.95291	0.949887	0.952726	0.945827	0.951366	0.935871	0.952635	0.936717	0.938097	0.957238	0.95204	0.979493	0.969688	0.980828	0.963815	0.972039	0.964307	0.959977	0.946696	0.94936	0.951215	0.946596			15.4	0.997948	0.991112	1.00053	0.99805	0.997484	0.990242	0.985818	0.995342	1.00162	1.00095	0.987059	1.00862	0.997677	0.998686	0.998974	0.993393	0.997161	0.99488	1.01165	1.01178
	15.5	0.954353	0.955888	0.942699	0.960783	0.94478	0.955072	0.931233	0.958558	0.936717	0.939789	0.952674	0.947566	0.981627	0.969688	0.982136	0.964942	0.972039	0.958594	0.957625	0.947636	0.94936	0.945748	0.940611			15.5	0.996872	0.997313	0.995477	0.991167	0.993031	0.99246	0.981749	0.992612	0.994455	1.00095	0.985882	1.00967	0.995603	1.00108	0.998974	0.991	0.998324	0.997533	1.01264	1.01066
	15.6	0.953727	0.954896	0.94886	0.948698	0.946874	0.956924	0.931233	0.953622	0.939928	0.933868	0.951533	0.947566	0.977359	0.970788	0.983444	0.959306	0.974621	0.960879	0.957625	0.943875	0.945174	0.952308	0.942606			15.6	0.998429	0.998346	1.00153	0.995755	0.997484	0.988024	0.985818	0.992612	0.993432	1.00326	0.985882	1.01285	0.99664	0.997491	0.996693	0.991	0.999488	0.998859	1.01757	1.0174
	15.7	0.952553	0.947947	0.945779	0.952726	0.942685	0.948587	0.933088	0.944737	0.931901	0.940635	0.953815	0.95204	0.978426	0.969688	0.97952	0.960433	0.969458	0.957452	0.96233	0.943875	0.944127	0.952308	0.944601			15.7	0.999175	0.994212	1.00456	1.00493	0.997484	0.993568	0.989887	0.987153	0.995478	1.01021	0.98	1.00967	0.994566	0.999881	0.997833	0.996984	0.999488	1.00019	1.01757	1.01066
	15.8	0.953243	0.95291	0.945779	0.953733	0.945827	0.95044	0.932161	0.953622	0.929493	0.937252	0.951533	0.955619	0.98376	0.969688	0.983444	0.958178	0.969458	0.958594	0.956448	0.947636	0.94622	0.947935	0.941608			15.8	1.00006	0.995246	0.997496	0.995755	0.991918	0.99246	0.989887	0.995342	1.00264	1.01136	0.987059	1.01179	0.998714	1.00346	0.997833	0.99459	0.998324	1.00284	1.02151	1.01291
	15.9	0.953643	0.94894	0.94886	0.952726	0.945827	0.953219	0.933088	0.948686	0.935915	0.936406	0.952674	0.947566	0.98056	0.971889	0.983444	0.962687	0.97333	0.959737	0.958801	0.945755	0.948314	0.950121	0.941608			15.9	1.0025	0.995246	0.997496	1.00264	0.993031	0.993568	0.990905	0.992612	1.00162	1.01599	0.992941	1.02237	1.00597	1.00824	0.998974	0.996984	1.00414	1.00019	1.02053	1.01403
	16	0.952429	0.95291	0.943726	0.943662	0.94059	0.946735	0.934016	0.952635	0.933507	0.942327	0.948111	0.949356	0.979493	0.971889	0.980828	0.960433	0.974621	0.963164	0.959977	0.942935	0.94308	0.946841	0.942606			16	1.00305	0.994212	1.00053	1.00493	0.993031	0.991351	0.98887	0.988973	1.00162	1.01368	0.992941	1.0192	1.00908	1.01541	0.996693	0.99459	1.00182	1.00284	1.02743	1.02078
	16.1	0.953546	0.955888	0.946806	0.95474	0.945827	0.955072	0.934016	0.948686	0.936717	0.940635	0.950392	0.946671	0.977359	0.97299	0.978213	0.96156	0.970748	0.958594	0.956448	0.945755	0.945174	0.950121	0.945598			16.1	1.00402	0.997313	0.992448	1.00379	0.994144	0.989133	0.990905	0.997161	1.00162	1.02409	0.995294	1.0192	1.00494	1.01183	1.00125	1.00417	1.00182	1.00417	1.02349	1.01965
	16.2	0.952391	0.94894	0.945779	0.949705	0.942685	0.947661	0.930306	0.952635	0.934309	0.933868	0.950392	0.951145	0.977359	0.97299	0.980828	0.963815	0.97333	0.960879	0.956448	0.944815	0.945174	0.947935	0.941608			16.2	1.00667	1.00145	0.990429	0.999197	0.999711	0.993568	0.994974	0.997161	0.99957	1.03104	0.997647	1.02343	1.01116	1.02138	1.00239	1.00417	1.00647	1.00682	1.02546	1.02078
	16.3	0.952892	0.953903	0.94886	0.945676	0.941637	0.948587	0.928451	0.942763	0.936717	0.936406	0.950392	0.950251	0.98056	0.969688	0.984751	0.96156	0.972039	0.962022	0.956448	0.946696	0.950407	0.951215	0.944601			16.3	1.00749	1.00041	1.00456	1.01182	0.991918	0.995786	0.995992	0.997161	0.99957	1.02062	0.998824	1.02449	1.0122	1.02377	1.00125	1.00536	1.00414	1.00417	1.0294	1.02078
	16.4	0.953281	0.951918	0.949887	0.951719	0.946874	0.949514	0.929378	0.944737	0.934309	0.938097	0.951533	0.952935	0.982693	0.967486	0.978213	0.962687	0.969458	0.959737	0.963507	0.946696	0.94936	0.946841	0.944601			16.4	1.01055	1.00661	1.00254	1.01067	0.998597	0.998004	0.999044	0.999891	1.00264	1.02756	1.00235	1.02449	1.01427	1.02258	1.00582	1.01135	1.00763	1.00814	1.03532	1.02302
	16.5	0.952744	0.951918	0.942699	0.945676	0.945827	0.95044	0.931233	0.948686	0.931099	0.940635	0.951533	0.949356	0.982693	0.97299	0.984751	0.963815	0.970748	0.958594	0.955272	0.946696	0.947267	0.946841	0.941608			16.5	1.01179	1.01178	1.00355	1.00952	0.999711	1.00022	1.00006	1.0008	1.00264	1.03219	1.00471	1.02661	1.01634	1.02377	1.00468	1.00776	1.00763	1.00814	1.03532	1.02864
	16.6	0.951382	0.958866	0.945779	0.946684	0.94478	0.945808	0.930306	0.947699	0.931901	0.937252	0.954956	0.948461	0.975225	0.97299	0.976905	0.960433	0.968167	0.960879	0.955272	0.942935	0.94622	0.940281	0.938616			16.6	1.01282	1.00971	1.00961	1.01296	1.00082	1.00355	1.00108	1.00171	1.00264	1.02756	1.00588	1.02767	1.01946	1.02616	1.00924	1.01494	1.01112	1.00947	1.03039	1.01965
	16.7	0.952827	0.945962	0.94886	0.948698	0.947922	0.952293	0.926596	0.951648	0.938323	0.933868	0.949252	0.944882	0.988028	0.969688	0.986059	0.963815	0.97333	0.959737	0.961154	0.944815	0.947267	0.941375	0.938616			16.7	1.0143	1.01592	1.00557	1.01296	1.00194	1.00355	1.00006	1.00808	1.00878	1.02988	1.00588	1.02555	1.01427	1.02258	1.01152	1.01613	1.01345	1.0108	1.03729	1.02752
	16.8	0.953174	0.950925	0.949887	0.947691	0.946874	0.948587	0.928451	0.948686	0.933507	0.940635	0.954956	0.955619	0.981627	0.968587	0.982136	0.962687	0.968167	0.962022	0.957625	0.947636	0.94936	0.943561	0.940611			16.8	1.01587	1.01695	1.00557	1.01526	1.01196	1.00355	1.00617	1.00808	1.01082	1.03104	1.00941	1.02661	1.01842	1.02736	1.01494	1.01853	1.00763	1.00151	1.04025	1.02752
	16.9	0.952431	0.95291	0.942699	0.946684	0.945827	0.948587	0.930306	0.948686	0.936717	0.938943	0.951533	0.952935	0.977359	0.971889	0.97952	0.963815	0.972039	0.964307	0.951742	0.947636	0.947267	0.942468	0.939613			16.9	1.01738	1.02212	1.01466	1.01985	1.01196	1.01131	1.0082	1.00717	1.00776	1.03219	1.01176	1.02449	1.01842	1.02377	1.01722	1.02331	1.0088	1.00682	1.03631	1.02415
	17	0.951873	0.957873	0.945779	0.947691	0.942685	0.943029	0.928451	0.944737	0.931099	0.939789	0.951533	0.949356	0.975225	0.970788	0.982136	0.960433	0.970748	0.959737	0.958801	0.947636	0.948314	0.945748	0.939613			17	1.02016	1.02108	1.01567	1.02558	1.01418	1.01242	1.01023	1.00535	1.0098	1.03219	1.01412	1.02343	1.0236	1.02975	1.02178	1.0305	1.01112	1.00417	1.03926	1.03876
	17.1	0.952726	0.956881	0.94886	0.951719	0.948969	0.95044	0.931233	0.946712	0.933507	0.940635	0.949252	0.948461	0.98056	0.97299	0.982136	0.959306	0.965585	0.960879	0.957625	0.943875	0.94936	0.941375	0.939613			17.1	1.01925	1.02005	1.01466	1.01985	1.00973	1.01464	1.00311	1.00899	1.00776	1.03451	1.01412	1.02767	1.0236	1.03094	1.02178	1.02691	1.01461	1.00682	1.03631	1.02977
	17.2	0.952757	0.957873	0.946806	0.949705	0.945827	0.948587	0.933088	0.948686	0.935112	0.941481	0.950392	0.950251	0.977359	0.970788	0.980828	0.958178	0.965585	0.964307	0.956448	0.944815	0.947267	0.944655	0.942606			17.2	1.01974	1.02108	1.00961	1.01985	1.01084	1.01242	1.00922	1.00899	1.0098	1.03335	1.01882	1.03084	1.02257	1.02377	1.0252	1.02212	1.0181	1.00682	1.03631	1.03539
	17.3	0.951993	0.951918	0.949887	0.948698	0.945827	0.946735	0.924741	0.949673	0.929493	0.943173	0.94697	0.947566	0.977359	0.970788	0.980828	0.962687	0.975912	0.959737	0.957625	0.943875	0.947267	0.942468	0.940611			17.3	1.02102	1.02005	1.01971	1.03017	1.01196	1.01686	1.0082	1.0099	1.00878	1.03451	1.01765	1.02872	1.02049	1.02616	1.02748	1.02212	1.01927	1.00682	1.03631	1.03427
	17.4	0.950949	0.954896	0.94886	0.944669	0.942685	0.943956	0.933088	0.941776	0.931099	0.93556	0.953815	0.95204	0.975225	0.971889	0.983444	0.958178	0.969458	0.958594	0.952919	0.945755	0.94936	0.937001	0.936621			17.4	1.02214	1.02625	1.01163	1.02214	1.02086	1.01353	1.01736	1.01081	1.01185	1.03682	1.01647	1.02661	1.0236	1.02736	1.02976	1.02571	1.0216	1.01212	1.03532	1.03089
	17.5	0.952195	0.953903	0.946806	0.947691	0.945827	0.951366	0.933088	0.947699	0.929493	0.933868	0.949252	0.949356	0.979493	0.975191	0.986059	0.958178	0.969458	0.956309	0.954095	0.947636	0.94936	0.943561	0.940611			17.5	1.02298	1.02522	1.01466	1.02673	1.0242	1.02129	1.02244	1.01263	1.01185	1.03335	1.01647	1.02872	1.02049	1.02736	1.02862	1.02092	1.0216	1.00814	1.03532	1.03651
	17.6	0.951057	0.95291	0.94886	0.947691	0.943732	0.948587	0.930306	0.947699	0.926283	0.933868	0.950392	0.943987	0.976292	0.968587	0.984751	0.962687	0.974621	0.959737	0.948213	0.945755	0.94622	0.942468	0.939613			17.6	1.02366	1.02522	1.01365	1.02673	1.02086	1.02462	1.01837	1.01263	1.01389	1.03335	1.01647	1.02872	1.02049	1.02616	1.03889	1.02571	1.02276	1.00814	1.03532	1.03764
	17.7	0.95112	0.95291	0.946806	0.945676	0.94059	0.947661	0.929378	0.947699	0.931099	0.933868	0.950392	0.951145	0.978426	0.976292	0.986059	0.959306	0.969458	0.957452	0.949389	0.944815	0.94622	0.941375	0.938616			17.7	1.02427	1.02625	1.02173	1.02214	1.02086	1.0224	1.01837	1.01445	1.01287	1.03798	1.01294	1.02661	1.0236	1.02975	1.03661	1.03169	1.02276	1.00682	1.03335	1.03989
	17.8	0.950886	0.949932	0.94886	0.946684	0.942685	0.945808	0.934016	0.947699	0.929493	0.937252	0.953815	0.949356	0.974158	0.968587	0.980828	0.957051	0.970748	0.959737	0.952919	0.947636	0.948314	0.940281	0.933629			17.8	1.02412	1.02418	1.02577	1.02444	1.02643	1.02129	1.01837	1.01263	1.01389	1.03451	1.01765	1.02661	1.02153	1.03094	1.0309	1.0281	1.0216	1.0108	1.03433	1.03427
	17.9	0.951356	0.953903	0.945779	0.944669	0.941637	0.945808	0.931233	0.951648	0.92548	0.938097	0.950392	0.948461	0.981627	0.971889	0.983444	0.958178	0.970748	0.959737	0.952919	0.946696	0.944127	0.945748	0.937618			17.9	1.0249	1.02728	1.01264	1.02444	1.03088	1.02573	1.02041	1.01536	1.01594	1.03798	1.02	1.02872	1.01842	1.02616	1.03319	1.02451	1.02741	1.00947	1.04025	1.03427
	18	0.950021	0.953903	0.946806	0.948698	0.94059	0.941176	0.927523	0.95066	0.928691	0.93133	0.949252	0.945777	0.975225	0.969688	0.976905	0.959306	0.966876	0.960879	0.955272	0.946696	0.948314	0.940281	0.936621			18	1.02496	1.02625	1.02173	1.03017	1.02866	1.02462	1.01939	1.01809	1.01594	1.03104	1.01412	1.02767	1.0236	1.03094	1.03889	1.02571	1.02625	1.00682	1.03236	1.03202
	18.1	0.950605	0.951918	0.947833	0.946684	0.942685	0.944882	0.929378	0.95066	0.927888	0.93556	0.952674	0.948461	0.979493	0.970788	0.983444	0.957051	0.964294	0.956309	0.957625	0.945755	0.94622	0.938095	0.935624			18.1	1.02622	1.02728	1.0187	1.02902	1.03311	1.0224	1.02651	1.01718	1.01799	1.04029	1.01882	1.02978	1.02153	1.02855	1.04003	1.02451	1.02741	1.00947	1.03236	1.03314
	18.2	0.950514	0.954896	0.946806	0.948698	0.942685	0.945808	0.925668	0.946712	0.927085	0.936406	0.952674	0.948461	0.977359	0.971889	0.986059	0.957051	0.969458	0.958594	0.948213	0.945755	0.942034	0.941375	0.937618			18.2	1.02655	1.03038	1.02476	1.03591	1.03088	1.02794	1.01837	1.019	1.02106	1.03335	1.02	1.02978	1.02049	1.02497	1.03661	1.02331	1.02858	1.00549	1.03138	1.04214
	18.3	0.94988	0.951918	0.945779	0.949705	0.938495	0.942103	0.928451	0.946712	0.929493	0.93133	0.94697	0.947566	0.978426	0.97299	0.984751	0.957051	0.969458	0.959737	0.952919	0.945755	0.944127	0.937001	0.936621			18.3	1.02622	1.02315	1.0187	1.03361	1.03645	1.02684	1.02244	1.01991	1.02106	1.04029	1.01647	1.02449	1.01946	1.02616	1.03889	1.02092	1.03207	1.00947	1.03236	1.03539
	18.4	0.949859	0.949932	0.94886	0.946684	0.939542	0.945808	0.928451	0.947699	0.924677	0.934714	0.94697	0.943092	0.981627	0.976292	0.980828	0.958178	0.969458	0.958594	0.956448	0.941055	0.94308	0.940281	0.934626			18.4	1.02661	1.03038	1.01567	1.02902	1.02643	1.02684	1.02041	1.01991	1.01799	1.03451	1.02235	1.03402	1.01946	1.02377	1.04117	1.02451	1.03556	1.0108	1.03631	1.03651
	18.5	0.949544	0.951918	0.949887	0.944669	0.937448	0.943956	0.926596	0.951648	0.928691	0.933022	0.948111	0.947566	0.975225	0.97299	0.976905	0.958178	0.966876	0.955167	0.950566	0.949516	0.94622	0.939188	0.935624			18.5	1.02638	1.02728	1.01668	1.03476	1.02977	1.0224	1.02346	1.01991	1.02208	1.03219	1.01529	1.02978	1.0236	1.03213	1.03889	1.02331	1.02974	1.00682	1.03433	1.03876
	18.6	0.94953	0.951918	0.947833	0.943662	0.933258	0.933766	0.924741	0.948686	0.923875	0.937252	0.950392	0.95204	0.981627	0.97299	0.988675	0.958178	0.965585	0.965449	0.948213	0.945755	0.94622	0.935908	0.933629			18.6	1.02643	1.02935	1.0187	1.02673	1.02754	1.02351	1.02244	1.02355	1.02208	1.03566	1.01765	1.02767	1.02049	1.02855	1.04231	1.02331	1.03207	1.0108	1.03433	1.03539
	18.7	0.949147	0.951918	0.949887	0.943662	0.9364	0.941176	0.927523	0.945724	0.926283	0.926255	0.949252	0.949356	0.975225	0.970788	0.980828	0.955924	0.968167	0.959737	0.956448	0.946696	0.947267	0.938095	0.934626			18.7	1.02807	1.03038	1.02173	1.03591	1.03088	1.02018	1.02549	1.019	1.02106	1.03451	1.01765	1.02978	1.02257	1.03213	1.03889	1.02691	1.03672	1.01345	1.03729	1.03876
	18.8	0.949142	0.94894	0.947833	0.941648	0.937448	0.943956	0.926596	0.946712	0.930296	0.929638	0.948111	0.949356	0.98056	0.971889	0.982136	0.959306	0.965585	0.959737	0.951742	0.943875	0.944127	0.937001	0.934626			18.8	1.02714	1.02935	1.02375	1.02902	1.032	1.0224	1.01939	1.01809	1.01492	1.04145	1.01882	1.02872	1.02049	1.02497	1.04117	1.02571	1.03789	1.01478	1.03631	1.03651
	18.9	0.948599	0.951918	0.94886	0.943662	0.933258	0.937471	0.927523	0.948686	0.928691	0.926255	0.953815	0.946671	0.979493	0.97299	0.986059	0.96156	0.966876	0.956309	0.949389	0.940115	0.93994	0.937001	0.932631			18.9	1.02846	1.02935	1.02375	1.03935	1.03422	1.02018	1.02956	1.02173	1.01696	1.04724	1.02118	1.02872	1.0236	1.02497	1.04003	1.02691	1.03556	1.0108	1.03236	1.03427
	19	0.94859	0.949932	0.947833	0.945676	0.935353	0.94025	0.928451	0.951648	0.926283	0.932176	0.948111	0.950251	0.977359	0.971889	0.976905	0.954797	0.964294	0.958594	0.949389	0.942935	0.944127	0.938095	0.934626			19	1.0282	1.03142	1.03081	1.03361	1.03645	1.02462	1.02651	1.02355	1.01492	1.04029	1.02235	1.02661	1.0236	1.02736	1.03661	1.01972	1.03323	1.01212	1.03433	1.03764
	19.1	0.948447	0.949932	0.94886	0.944669	0.935353	0.939324	0.923813	0.947699	0.924677	0.933022	0.94697	0.949356	0.978426	0.97299	0.980828	0.958178	0.964294	0.959737	0.950566	0.941995	0.944127	0.941375	0.929639			19.1	1.02818	1.03142	1.02879	1.03705	1.03645	1.02351	1.02855	1.02082	1.01696	1.04145	1.02235	1.03084	1.02153	1.02377	1.03661	1.02092	1.03556	1.0161	1.02842	1.03427
	19.2	0.948471	0.949932	0.945779	0.944669	0.937448	0.942103	0.928451	0.946712	0.927085	0.929638	0.949252	0.945777	0.979493	0.967486	0.982136	0.955924	0.968167	0.962022	0.950566	0.941995	0.945174	0.935908	0.930636			19.2	1.02949	1.03038	1.02778	1.03591	1.03645	1.02573	1.03058	1.02446	1.01492	1.04145	1.02353	1.0319	1.01946	1.02497	1.04117	1.0281	1.03905	1.01876	1.03039	1.03539
	19.3	0.948676	0.95291	0.947833	0.946684	0.9364	0.938397	0.930306	0.948686	0.928691	0.933022	0.949252	0.947566	0.98056	0.966386	0.983444	0.955924	0.966876	0.954024	0.950566	0.944815	0.945174	0.933721	0.929639			19.3	1.02803	1.03142	1.02577	1.03132	1.03422	1.03016	1.02956	1.01991	1.01492	1.04492	1.02235	1.02872	1.01634	1.02497	1.03889	1.02212	1.03439	1.01478	1.03236	1.03539
	19.4	0.948844	0.955888	0.947833	0.943662	0.937448	0.939324	0.924741	0.954609	0.926283	0.933868	0.94697	0.951145	0.975225	0.969688	0.980828	0.958178	0.968167	0.956309	0.951742	0.941995	0.93994	0.938095	0.932631			19.4	1.02741	1.03038	1.02778	1.03017	1.032	1.02905	1.03363	1.02082	1.01185	1.04145	1.01882	1.02661	1.01738	1.02616	1.03889	1.02451	1.03672	1.01478	1.02546	1.03427
	19.5	0.947643	0.954896	0.951941	0.944669	0.9364	0.94025	0.927523	0.947699	0.927888	0.932176	0.940124	0.945777	0.973091	0.969688	0.975597	0.955924	0.964294	0.962022	0.951742	0.940115	0.938893	0.934814	0.932631			19.5	1.02672	1.03245	1.03081	1.03017	1.02643	1.03238	1.02346	1.02537	1.01082	1.03798	1.02235	1.02767	1.0122	1.02377	1.03433	1.01972	1.03789	1.0161	1.02842	1.03539
	19.6	0.948086	0.951918	0.949887	0.941648	0.937448	0.943956	0.926596	0.95066	0.92548	0.929638	0.948111	0.939513	0.98056	0.966386	0.97952	0.955924	0.968167	0.956309	0.950566	0.941055	0.942034	0.935908	0.936621			19.6	1.02802	1.02418	1.03081	1.03247	1.02866	1.02351	1.0316	1.02991	1.01389	1.04261	1.02235	1.02661	1.01531	1.02497	1.03661	1.02691	1.03905	1.01478	1.0294	1.03876
	19.7	0.946734	0.95291	0.94886	0.944669	0.934305	0.939324	0.925668	0.955596	0.922269	0.926255	0.948111	0.944882	0.979493	0.966386	0.984751	0.955924	0.963003	0.952882	0.944684	0.941055	0.93994	0.931534	0.925649			19.7	1.02686	1.03245	1.02375	1.02902	1.03088	1.03127	1.03363	1.02355	1.01185	1.03798	1.02235	1.02661	1.01427	1.01899	1.03661	1.02571	1.03789	1.01478	1.02447	1.03427
	19.8	0.94728	0.949932	0.946806	0.939634	0.938495	0.943029	0.927523	0.952635	0.929493	0.927947	0.942406	0.946671	0.970957	0.965285	0.97952	0.954797	0.961712	0.959737	0.948213	0.941995	0.942034	0.933721	0.937618			19.8	1.0262	1.03452	1.02577	1.03017	1.02643	1.0346	1.02855	1.0281	1.01185	1.03451	1.01882	1.02132	1.01427	1.02138	1.03433	1.02331	1.03439	1.01345	1.02447	1.03764
	19.9	0.94766	0.946955	0.94886	0.943662	0.939542	0.945808	0.924741	0.951648	0.924677	0.932176	0.948111	0.943092	0.975225	0.965285	0.980828	0.958178	0.966876	0.954024	0.949389	0.941995	0.94308	0.933721	0.930636			19.9	1.02793	1.03142	1.03182	1.03361	1.03422	1.03016	1.03465	1.02537	1.01185	1.03798	1.02118	1.02555	1.01738	1.02019	1.04003	1.02212	1.03905	1.0161	1.02151	1.03651
	20	0.947257	0.951918	0.946806	0.943662	0.941637	0.947661	0.921958	0.955596	0.927085	0.927947	0.94697	0.943092	0.977359	0.966386	0.978213	0.954797	0.964294	0.949454	0.948213	0.940115	0.937847	0.937001	0.931634			20	1.02753	1.03038	1.0298	1.03017	1.02866	1.0346	1.03363	1.02719	1.01389	1.03798	1.02235	1.02555	1.01427	1.0166	1.03889	1.02212	1.03672	1.0161	1.02546	1.03876
	20.1	0.946006	0.94894	0.945779	0.941648	0.939542	0.942103	0.922886	0.95066	0.926283	0.929638	0.948111	0.946671	0.974158	0.968587	0.982136	0.955924	0.964294	0.949454	0.944684	0.934474	0.9368	0.933721	0.925649			20.1	1.02757	1.02832	1.0298	1.03132	1.02754	1.02794	1.02346	1.02537	1.01594	1.03451	1.02471	1.02872	1.01116	1.02138	1.04117	1.02571	1.04021	1.0161	1.02842	1.04214
	20.2	0.946659	0.946955	0.943726	0.945676	0.94059	0.938397	0.922886	0.952635	0.927085	0.928793	0.941265	0.946671	0.975225	0.971889	0.97952	0.955924	0.965585	0.952882	0.943507	0.933534	0.944127	0.937001	0.932631			20.2	1.02591	1.03038	1.02476	1.03132	1.02977	1.02351	1.02549	1.01991	1.01185	1.03914	1.01529	1.02343	1.01427	1.02019	1.03775	1.02331	1.03672	1.01876	1.02546	1.04101
	20.3	0.946471	0.951918	0.942699	0.944669	0.941637	0.941176	0.923813	0.951648	0.927085	0.928793	0.942406	0.943092	0.978426	0.960882	0.97952	0.955924	0.968167	0.954024	0.947037	0.938234	0.93994	0.932628	0.928641			20.3	1.02621	1.02832	1.02577	1.02673	1.03422	1.02129	1.02855	1.02355	1.00673	1.03914	1.01647	1.02767	1.00805	1.0178	1.04117	1.02571	1.03905	1.02141	1.02546	1.04101
	20.4	0.947447	0.946955	0.940645	0.949705	0.943732	0.945808	0.925668	0.947699	0.92548	0.929638	0.948111	0.941303	0.978426	0.965285	0.980828	0.957051	0.966876	0.951739	0.947037	0.937294	0.942034	0.935908	0.936621			20.4	1.02683	1.03452	1.02375	1.02673	1.03088	1.0224	1.02855	1.02082	1.01185	1.03682	1.02	1.02978	1.01531	1.02138	1.03319	1.02451	1.03905	1.02274	1.02645	1.04101
	20.5	0.946532	0.946955	0.941672	0.944669	0.938495	0.94025	0.926596	0.95066	0.929493	0.93133	0.945829	0.945777	0.975225	0.966386	0.978213	0.957051	0.969458	0.951739	0.947037	0.933534	0.938893	0.934814	0.929639			20.5	1.02816	1.03348	1.02677	1.0382	1.03422	1.02573	1.0316	1.02082	1.0098	1.04029	1.02118	1.02449	1.01323	1.02138	1.03547	1.02212	1.04138	1.02539	1.02743	1.04214
	20.6	0.945877	0.944969	0.944753	0.942655	0.935353	0.941176	0.921031	0.955596	0.924677	0.93133	0.948111	0.945777	0.970957	0.963084	0.976905	0.955924	0.968167	0.952882	0.948213	0.934474	0.940987	0.932628	0.929639			20.6	1.02814	1.03142	1.02072	1.03476	1.03422	1.02905	1.0316	1.019	1.00673	1.04029	1.02	1.02978	1.02049	1.02497	1.03775	1.02691	1.03672	1.02274	1.02546	1.04214
	20.7	0.946789	0.941992	0.943726	0.945676	0.941637	0.941176	0.922886	0.948686	0.923875	0.933022	0.940124	0.944882	0.976292	0.964184	0.982136	0.957051	0.969458	0.956309	0.948213	0.935414	0.94308	0.935908	0.933629			20.7	1.02772	1.03142	1.02274	1.03705	1.03088	1.02684	1.02448	1.02082	1.01185	1.04145	1.01882	1.02978	1.01842	1.02138	1.03661	1.02691	1.03905	1.02141	1.02349	1.04326
	20.8	0.946593	0.944969	0.943726	0.944669	0.939542	0.947661	0.923813	0.948686	0.92548	0.933868	0.942406	0.945777	0.970957	0.967486	0.976905	0.955924	0.966876	0.947169	0.949389	0.940115	0.945174	0.934814	0.929639			20.8	1.02705	1.03245	1.02476	1.03591	1.02977	1.02351	1.02956	1.01718	1.00776	1.03335	1.01765	1.03084	1.02257	1.02377	1.03433	1.02092	1.04021	1.02672	1.01954	1.04326
	20.9	0.945092	0.941992	0.938591	0.948698	0.938495	0.943029	0.922886	0.949673	0.927888	0.933022	0.943547	0.934145	0.970957	0.965285	0.975597	0.954797	0.964294	0.955167	0.938801	0.941995	0.945174	0.929348	0.928641			20.9	1.02675	1.02935	1.01971	1.0405	1.03645	1.02573	1.02956	1.01809	1.00776	1.03914	1.01529	1.02767	1.01116	1.0178	1.03661	1.02331	1.03905	1.02274	1.02743	1.04101
	21	0.946263	0.940999	0.940645	0.949705	0.94059	0.945808	0.924741	0.95066	0.923072	0.926255	0.941265	0.943987	0.974158	0.964184	0.978213	0.954797	0.966876	0.958594	0.944684	0.940115	0.940987	0.934814	0.932631			21	1.02566	1.02832	1.02274	1.03591	1.032	1.02573	1.02549	1.01263	1.00571	1.03451	1.02235	1.03296	1.0122	1.01541	1.03319	1.02331	1.03789	1.02406	1.02447	1.03876
	21.1	0.946499	0.943977	0.940645	0.948698	0.942685	0.947661	0.923813	0.954609	0.922269	0.927947	0.94697	0.941303	0.970957	0.964184	0.982136	0.953669	0.968167	0.955167	0.952919	0.940115	0.94308	0.929348	0.922656			21.1	1.02665	1.02522	1.02476	1.02673	1.0409	1.02018	1.03465	1.01627	1.01082	1.03682	1.02471	1.03507	1.01012	1.02019	1.0309	1.02212	1.03439	1.02274	1.02645	1.04326
	21.2	0.945355	0.942984	0.940645	0.939634	0.94059	0.943956	0.924741	0.95066	0.923875	0.933022	0.942406	0.946671	0.967756	0.961983	0.975597	0.953669	0.966876	0.951739	0.948213	0.937294	0.942034	0.934814	0.928641			21.2	1.02694	1.02728	1.02577	1.02788	1.03422	1.02905	1.02753	1.01263	1.00776	1.03798	1.02471	1.03296	1.01012	1.02138	1.03319	1.02331	1.03905	1.02539	1.02842	1.04326
	21.3	0.945874	0.942984	0.943726	0.950712	0.942685	0.949514	0.921958	0.951648	0.928691	0.922871	0.941265	0.947566	0.974158	0.966386	0.978213	0.951415	0.963003	0.952882	0.941154	0.938234	0.940987	0.931534	0.927644			21.3	1.02739	1.02522	1.02072	1.03591	1.03979	1.02573	1.0316	1.01081	1.01185	1.03914	1.02118	1.02767	1.01427	1.0178	1.03775	1.02331	1.03672	1.02406	1.03138	1.04551
	21.4	0.945735	0.942984	0.942699	0.947691	0.939542	0.946735	0.921958	0.95066	0.923072	0.93133	0.944688	0.947566	0.970957	0.959782	0.97952	0.950287	0.966876	0.956309	0.948213	0.939175	0.93994	0.931534	0.924651			21.4	1.0271	1.03142	1.02072	1.03132	1.03533	1.02684	1.03058	1.01809	1.00366	1.03219	1.02353	1.03402	1.01427	1.02019	1.03319	1.02092	1.03905	1.02672	1.02842	1.04438
	21.5	0.944823	0.942984	0.942699	0.939634	0.939542	0.942103	0.922886	0.95066	0.917453	0.930484	0.943547	0.945777	0.966689	0.963084	0.974289	0.953669	0.966876	0.948311	0.949389	0.935414	0.938893	0.938095	0.933629			21.5	1.02713	1.02728	1.02677	1.03591	1.03311	1.02794	1.02448	1.01445	1.00776	1.03682	1.01647	1.02555	1.01946	1.02258	1.03775	1.02092	1.04021	1.02937	1.02546	1.04326
	21.6	0.946113	0.942984	0.943726	0.948698	0.942685	0.942103	0.920103	0.955596	0.92548	0.923717	0.944688	0.945777	0.967756	0.966386	0.976905	0.953669	0.968167	0.951739	0.947037	0.935414	0.93994	0.940281	0.931634			21.6	1.02826	1.02935	1.02274	1.04164	1.03645	1.0224	1.03058	1.01718	1.00878	1.03682	1.02	1.02978	1.01946	1.02138	1.03889	1.02451	1.04021	1.02937	1.02645	1.04101
	21.7	0.945484	0.940999	0.942699	0.940641	0.939542	0.945808	0.922886	0.951648	0.923875	0.93133	0.942406	0.947566	0.965622	0.963084	0.976905	0.954797	0.968167	0.952882	0.94586	0.937294	0.940987	0.937001	0.928641			21.7	1.0288	1.03038	1.02778	1.04508	1.03422	1.0224	1.02753	1.01354	1.01082	1.03566	1.02235	1.03402	1.02257	1.02855	1.03775	1.02331	1.03789	1.02672	1.02447	1.04214
	21.8	0.945693	0.941992	0.944753	0.942655	0.939542	0.943956	0.922886	0.951648	0.919861	0.93133	0.944688	0.944882	0.967756	0.969688	0.978213	0.953669	0.965585	0.950596	0.944684	0.938234	0.94308	0.935908	0.929639			21.8	1.0287	1.03245	1.02577	1.0382	1.03311	1.02351	1.02651	1.01536	1.01799	1.03335	1.02235	1.03084	1.02568	1.02616	1.03775	1.02571	1.03905	1.02672	1.02151	1.04326
	21.9	0.945645	0.941992	0.941672	0.940641	0.939542	0.947661	0.920103	0.952635	0.928691	0.93133	0.94697	0.949356	0.968823	0.966386	0.971674	0.953669	0.966876	0.950596	0.947037	0.939175	0.94308	0.932628	0.923654			21.9	1.02718	1.02418	1.02274	1.0405	1.03422	1.0224	1.02855	1.01354	1.01696	1.03682	1.01647	1.02767	1.02049	1.02616	1.02862	1.02092	1.03789	1.02937	1.02349	1.04551
	22	0.946206	0.940999	0.944753	0.944669	0.942685	0.946735	0.921958	0.958558	0.921467	0.93133	0.937842	0.944882	0.973091	0.965285	0.978213	0.954797	0.968167	0.951739	0.94586	0.941055	0.940987	0.934814	0.926646			22	1.0274	1.02315	1.02375	1.03705	1.03422	1.02351	1.02549	1.01445	1.01901	1.03335	1.02235	1.0319	1.01842	1.02855	1.03433	1.02212	1.04021	1.02804	1.01856	1.04214
	22.1	0.945033	0.940999	0.944753	0.942655	0.94059	0.943956	0.923813	0.956584	0.921467	0.923717	0.938983	0.939513	0.970957	0.964184	0.974289	0.953669	0.968167	0.946026	0.944684	0.941055	0.94622	0.934814	0.929639			22.1	1.0267	1.02212	1.01971	1.03705	1.032	1.01796	1.02651	1.01627	1.02106	1.03451	1.01882	1.02555	1.01634	1.02855	1.03433	1.01972	1.04021	1.02539	1.02349	1.04776
	22.2	0.944302	0.941992	0.943726	0.940641	0.937448	0.939324	0.920103	0.955596	0.923875	0.928793	0.944688	0.940408	0.966689	0.961983	0.97952	0.953669	0.968167	0.949454	0.939978	0.937294	0.942034	0.932628	0.926646			22.2	1.02655	1.02625	1.01769	1.03935	1.02866	1.01907	1.02549	1.01172	1.01389	1.03104	1.02118	1.02872	1.01738	1.02616	1.03661	1.02691	1.03789	1.0307	1.0225	1.04326
	22.3	0.94515	0.940006	0.945779	0.942655	0.9364	0.944882	0.921958	0.953622	0.923072	0.929638	0.940124	0.938618	0.96989	0.968587	0.974289	0.952542	0.969458	0.949454	0.943507	0.938234	0.942034	0.935908	0.932631			22.3	1.02545	1.02728	1.01466	1.0405	1.03311	1.01464	1.02855	1.01718	1.01389	1.02988	1.01647	1.02132	1.00701	1.02377	1.03319	1.02451	1.03556	1.02672	1.02645	1.04888
	22.4	0.943241	0.940006	0.945779	0.939634	0.938495	0.944882	0.921031	0.95066	0.923072	0.926255	0.938983	0.935039	0.96989	0.964184	0.974289	0.951415	0.95913	0.949454	0.944684	0.936354	0.938893	0.931534	0.927644			22.4	1.02644	1.02522	1.02577	1.04279	1.02977	1.01796	1.02651	1.01991	1.01287	1.03335	1.02	1.0319	1.01116	1.02258	1.03547	1.02092	1.03672	1.02672	1.02053	1.04214
	22.5	0.945454	0.95291	0.941672	0.943662	0.937448	0.938397	0.924741	0.957571	0.92548	0.927947	0.943547	0.934145	0.970957	0.967486	0.983444	0.953669	0.968167	0.952882	0.943507	0.939175	0.938893	0.932628	0.921659			22.5	1.02685	1.02625	1.01466	1.03935	1.03422	1.01575	1.02651	1.02173	1.01287	1.03566	1.01765	1.02978	1.01012	1.02019	1.03661	1.02451	1.03905	1.02804	1.0294	1.04776
	22.6	0.945097	0.95291	0.942699	0.944669	0.94059	0.945808	0.921031	0.952635	0.923072	0.927101	0.944688	0.93325	0.972024	0.959782	0.972981	0.953669	0.968167	0.947169	0.948213	0.939175	0.944127	0.933721	0.924651			22.6	1.02636	1.02728	1.01769	1.03591	1.03422	1.01686	1.02549	1.02082	1.0098	1.03682	1.02235	1.03084	1.00908	1.0166	1.03547	1.02092	1.03789	1.02672	1.02842	1.04776
	22.7	0.944704	0.949932	0.945779	0.941648	0.942685	0.944882	0.921958	0.958558	0.924677	0.925409	0.942406	0.929671	0.974158	0.965285	0.982136	0.94916	0.965585	0.952882	0.941154	0.932594	0.937847	0.930441	0.924651			22.7	1.02607	1.02212	1.01971	1.04279	1.03311	1.01464	1.02346	1.02719	1.01287	1.03798	1.01765	1.02661	1.0122	1.0178	1.03204	1.01972	1.03905	1.02937	1.02151	1.04551
	22.8	0.94404	0.945962	0.947833	0.939634	0.943732	0.943956	0.918248	0.954609	0.919861	0.928793	0.942406	0.930566	0.966689	0.965285	0.97952	0.946906	0.964294	0.952882	0.94586	0.932594	0.938893	0.933721	0.926646			22.8	1.02558	1.02522	1.01769	1.03132	1.02643	1.01686	1.02346	1.02537	1.0098	1.03566	1.02118	1.03507	1.01012	1.01422	1.03433	1.02092	1.04021	1.02804	1.02349	1.04663
	22.9	0.944812	0.943977	0.947833	0.942655	0.94478	0.945808	0.923813	0.952635	0.916651	0.922871	0.941265	0.93325	0.970957	0.964184	0.978213	0.953669	0.966876	0.949454	0.948213	0.935414	0.94308	0.932628	0.927644			22.9	1.02629	1.02522	1.02375	1.03132	1.03311	1.01575	1.02651	1.02173	1.01389	1.03914	1.02	1.0319	1.0122	1.0166	1.03204	1.01613	1.03905	1.02672	1.02447	1.05
	23	0.945138	0.947947	0.942699	0.939634	0.942685	0.943029	0.921031	0.954609	0.919861	0.92118	0.938983	0.93146	0.972024	0.967486	0.983444	0.955924	0.968167	0.951739	0.944684	0.941055	0.942034	0.933721	0.929639			23	1.0253	1.02625	1.01567	1.03935	1.03088	1.01686	1.02448	1.02173	1.0098	1.03682	1.01647	1.0319	1.01323	1.01541	1.03204	1.01733	1.03789	1.03202	1.02053	1.04214
	23.1	0.943699	0.94894	0.942699	0.941648	0.94478	0.944882	0.921958	0.954609	0.919861	0.922871	0.940124	0.928776	0.964555	0.971889	0.976905	0.94916	0.961712	0.954024	0.943507	0.933534	0.93994	0.929348	0.925649			23.1	1.02578	1.02522	1.02577	1.04164	1.03533	1.01464	1.02448	1.019	1.00673	1.03335	1.02	1.03507	1.01323	1.01541	1.03547	1.02331	1.03556	1.02406	1.02053	1.04101
	23.2	0.945396	0.950925	0.946806	0.945676	0.94478	0.953219	0.921031	0.951648	0.921467	0.926255	0.940124	0.936829	0.974158	0.963084	0.978213	0.94916	0.963003	0.951739	0.948213	0.936354	0.942034	0.929348	0.924651			23.2	1.02588	1.02315	1.01971	1.03476	1.03756	1.01796	1.02244	1.019	1.00673	1.03798	1.01412	1.02978	1.01842	1.02019	1.03319	1.01853	1.04138	1.02804	1.02447	1.04438
	23.3	0.944996	0.947947	0.947833	0.936612	0.943732	0.944882	0.921958	0.957571	0.918256	0.927101	0.937842	0.935039	0.976292	0.965285	0.980828	0.94916	0.964294	0.950596	0.947037	0.937294	0.940987	0.933721	0.925649			23.3	1.02478	1.02832	1.01668	1.03247	1.032	1.01575	1.02346	1.019	1.00673	1.03682	1.01647	1.02978	1.0122	1.01422	1.03319	1.02092	1.03789	1.02406	1.02645	1.04438
	23.4	0.944202	0.944969	0.947833	0.939634	0.942685	0.945808	0.925668	0.953622	0.922269	0.922871	0.936701	0.930566	0.967756	0.970788	0.975597	0.945778	0.965585	0.947169	0.949389	0.936354	0.942034	0.933721	0.925649			23.4	1.02381	1.02625	1.01971	1.0382	1.03422	1.01575	1.02855	1.01809	1.01082	1.03451	1.01176	1.02555	1.00908	1.00824	1.03319	1.01853	1.03207	1.02008	1.02349	1.04438
	23.5	0.943143	0.944969	0.946806	0.940641	0.94059	0.946735	0.919176	0.959545	0.923072	0.922025	0.938983	0.926986	0.972024	0.967486	0.976905	0.951415	0.964294	0.947169	0.944684	0.928833	0.9368	0.929348	0.920662			23.5	1.02551	1.02832	1.01466	1.0405	1.02866	1.02129	1.02346	1.019	1.01185	1.03104	1.01765	1.0319	1.01738	1.0166	1.0309	1.02092	1.03556	1.02406	1.02546	1.04551
	23.6	0.944882	0.949932	0.944753	0.938627	0.941637	0.941176	0.923813	0.959545	0.923072	0.925409	0.937842	0.926092	0.973091	0.967486	0.982136	0.951415	0.965585	0.949454	0.948213	0.932594	0.938893	0.937001	0.929639			23.6	1.02615	1.02522	1.02778	1.03935	1.03088	1.01575	1.02448	1.019	1.00776	1.03451	1.01765	1.03084	1.0122	1.01302	1.03547	1.02451	1.03789	1.02937	1.02447	1.04663
	23.7	0.944442	0.94894	0.944753	0.941648	0.943732	0.947661	0.924741	0.95066	0.921467	0.923717	0.942406	0.924302	0.968823	0.968587	0.980828	0.94916	0.966876	0.951739	0.94586	0.931654	0.940987	0.931534	0.927644			23.7	1.0253	1.02418	1.0187	1.04738	1.02643	1.01796	1.02549	1.01718	1.00776	1.03451	1.02	1.02872	1.01323	1.01302	1.03319	1.01972	1.03905	1.02539	1.02546	1.04326
	23.8	0.943943	0.949932	0.946806	0.938627	0.941637	0.947661	0.922886	0.962507	0.918256	0.92118	0.937842	0.921618	0.973091	0.966386	0.980828	0.948033	0.963003	0.946026	0.94586	0.936354	0.93994	0.932628	0.925649			23.8	1.02509	1.03348	1.01769	1.03591	1.032	1.01686	1.02143	1.01627	1.0098	1.03219	1.01882	1.02978	1.01531	1.01422	1.03204	1.01972	1.03672	1.02539	1.02349	1.04551
	23.9	0.943662	0.949932	0.941672	0.940641	0.945827	0.944882	0.921031	0.958558	0.915848	0.922025	0.93556	0.922513	0.972024	0.967486	0.97952	0.950287	0.965585	0.948311	0.939978	0.934474	0.944127	0.932628	0.927644			23.9	1.02602	1.02522	1.02879	1.04967	1.02643	1.01575	1.01939	1.01536	1.01185	1.03219	1.01882	1.02661	1.02257	1.0166	1.03547	1.02691	1.03789	1.02539	1.01954	1.03989
	24	0.943805	0.944969	0.944753	0.939634	0.942685	0.943956	0.923813	0.957571	0.921467	0.922025	0.93556	0.925197	0.968823	0.968587	0.975597	0.954797	0.966876	0.947169	0.94586	0.937294	0.940987	0.930441	0.925649			24	1.02423	1.02832	1.02274	1.0382	1.02643	1.01242	1.01736	1.01627	1.01389	1.03219	1.01882	1.02872	1.01427	1.01302	1.0309	1.01972	1.03905	1.02539	1.02053	1.04214
	24.1	0.942619	0.947947	0.944753	0.939634	0.94059	0.939324	0.918248	0.955596	0.921467	0.922871	0.93556	0.922513	0.968823	0.965285	0.97952	0.946906	0.963003	0.951739	0.943507	0.936354	0.938893	0.930441	0.924651			24.1	1.02586	1.02935	1.02375	1.04853	1.02977	1.01131	1.01837	1.01445	1.01082	1.03219	1.01882	1.02767	1.01323	1.0178	1.03661	1.02571	1.04138	1.02672	1.02053	1.04438
	24.2	0.944206	0.94894	0.942699	0.936612	0.941637	0.945808	0.922886	0.958558	0.920664	0.924563	0.938983	0.926986	0.970957	0.967486	0.97952	0.951415	0.965585	0.950596	0.94586	0.934474	0.93994	0.933721	0.924651			24.2	1.02589	1.02935	1.0187	1.0382	1.03088	1.01353	1.02346	1.01627	1.02208	1.03104	1.02118	1.03084	1.01946	1.01541	1.03547	1.01972	1.03789	1.02672	1.01954	1.04214
	24.3	0.94351	0.943977	0.944753	0.93762	0.943732	0.945808	0.922886	0.948686	0.922269	0.922025	0.937842	0.924302	0.968823	0.965285	0.980828	0.951415	0.965585	0.949454	0.942331	0.936354	0.940987	0.932628	0.929639			24.3	1.02637	1.03245	1.02677	1.04164	1.03311	1.01686	1.02448	1.01991	1.01799	1.02756	1.01882	1.02555	1.02153	1.0178	1.03433	1.02212	1.03672	1.02274	1.01856	1.04214
	24.4	0.943691	0.953903	0.944753	0.938627	0.943732	0.946735	0.920103	0.953622	0.917453	0.923717	0.937842	0.922513	0.968823	0.968587	0.97952	0.952542	0.965585	0.948311	0.948213	0.932594	0.937847	0.931534	0.924651			24.4	1.027	1.03348	1.02375	1.04853	1.032	1.01575	1.02244	1.01627	1.01696	1.03451	1.02	1.02767	1.01842	1.0178	1.03319	1.02092	1.03789	1.02539	1.0225	1.04551
	24.5	0.944586	0.951918	0.943726	0.944669	0.947922	0.947661	0.923813	0.955596	0.927085	0.922025	0.93556	0.918933	0.967756	0.971889	0.982136	0.951415	0.965585	0.949454	0.948213	0.932594	0.937847	0.930441	0.924651			24.5	1.02585	1.03452	1.03081	1.05082	1.032	1.01575	1.02244	1.01081	1.00776	1.03451	1.01765	1.02872	1.01531	1.01541	1.03204	1.02331	1.03905	1.02539	1.01954	1.03539
	24.6	0.944127	0.95291	0.947833	0.93762	0.943732	0.94025	0.922886	0.955596	0.918256	0.928793	0.937842	0.919828	0.972024	0.966386	0.980828	0.952542	0.966876	0.949454	0.94586	0.938234	0.937847	0.931534	0.923654			24.6	1.02636	1.02935	1.0298	1.04738	1.03088	1.01575	1.02346	1.01445	1.01594	1.03219	1.01882	1.02661	1.01738	1.0166	1.03319	1.01972	1.04254	1.02672	1.02349	1.03651
	24.7	0.944549	0.950925	0.950914	0.940641	0.943732	0.941176	0.923813	0.954609	0.916651	0.924563	0.93556	0.922513	0.974158	0.966386	0.983444	0.950287	0.966876	0.955167	0.94586	0.933534	0.940987	0.932628	0.925649			24.7	1.02482	1.03142	1.02375	1.04508	1.02754	1.01353	1.01939	1.01172	1.01492	1.02641	1.01529	1.02978	1.01634	1.01899	1.03204	1.01853	1.03905	1.02539	1.0225	1.03989
	24.8	0.944679	0.953903	0.951941	0.940641	0.945827	0.944882	0.921958	0.949673	0.919059	0.925409	0.93556	0.922513	0.972024	0.970788	0.978213	0.951415	0.966876	0.952882	0.951742	0.931654	0.9368	0.931534	0.927644			24.8	1.02521	1.03452	1.02677	1.04394	1.02532	1.01242	1.01837	1.01445	1.01185	1.03682	1.01647	1.02978	1.01946	1.0166	1.02976	1.01613	1.03672	1.02406	1.02349	1.04214
	24.9	0.943658	0.942984	0.94886	0.940641	0.946874	0.944882	0.920103	0.953622	0.921467	0.924563	0.93556	0.920723	0.970957	0.966386	0.974289	0.950287	0.965585	0.948311	0.949389	0.932594	0.93994	0.934814	0.927644			24.9	1.02715	1.03762	1.02375	1.04853	1.032	1.01242	1.02346	1.01263	1.01185	1.03682	1.01765	1.02449			1.03204	1.01853	1.04021	1.02804	1.02053	1.04101
	25	0.944182	0.949932	0.951941	0.938627	0.946874	0.947661	0.921958	0.955596	0.918256	0.927947	0.937842	0.918933	0.974158	0.969688	0.97952	0.950287	0.961712	0.948311	0.944684	0.930714	0.9368	0.935908	0.924651			25	1.02561	1.03659	1.02577	1.04623	1.02977	1.01575	1.01837	1.01536	1.01287	1.02872	1.01765	1.02872			1.02976	1.01494	1.03905	1.02804	1.01461	1.03314
[truncated: 68 more columns]
