# Supplementary material for: FRET kinase sensor development reveals SnRK2/OST1 activation by ABA but not by MeJA and high CO2 during stomatal closure
Source: eLife. 2020 May 28;9:e56351. doi: 10.7554/eLife.56351 (PMC7289597; doi:10.7554/eLife.56351)
Supplement: Figure 6—source data 1. [file elife-56351-fig6-data1.xlsx]

## Sheet: Figure 6
		Normalized ratio																Normalized ratio														Normalized ratio													Normalized ratio
Figure 6A	Time (min)	Stomate_1	Stomate_2	Stomate_3	Stomate_4	Stomate_5	Stomate_6	Stomate_7	Stomate_8	Stomate_9	Stomate_10	Stomate_11	Stomate_12	Stomate_13		Figure 6B	Time (min)	Stomate_1	Stomate_2	Stomate_3	Stomate_4	Stomate_5	Stomate_6	Stomate_7	Stomate_8	Stomate_9	Stomate_10	Stomate_11		Figure 6C	Time (min)	Stomate_1	Stomate_2	Stomate_3	Stomate_4	Stomate_5	Stomate_6	Stomate_7	Stomate_8	Stomate_9	Stomate_10		Figure 6D	Time (min)	Stomate_1	Stomate_2	Stomate_3	Stomate_4	Stomate_5
	0.1	1.00402	0.996779	0.988028	0.987298	0.995214	0.989742	0.995275	1.00201	1.00233	0.989001	0.995415	1.00151	0.990484			0.1	0.99632	1.00588	1.00544	0.991454	0.998686	0.995553	0.989803	0.999488	0.998859	0.994892	1.00054			0.1	0.996207	1.00014	1.00195	1.00723	1.00191	0.982109	1.00478	0.992769	0.99855	1.00048			0.1	0.997729	0.998826	0.990947	0.998015	1.00245
	0.2	0.998311	1.00125	0.993363	0.9895	0.995214	0.990869	1.00044	0.994013	0.999976	0.989001	0.998556	1.00479	0.993477			0.2	0.999792	1.00353	1.00015	0.991454	0.999881	0.995553	0.996984	1.00182	1.00019	0.988976	0.993794			0.2	0.992513	0.993363	0.99853	1.00839	1.00086	0.991195	1.00776	0.998508	1.00093	1.00141			0.2	0.998734	0.997493	0.992059	1.00144	1.00378
	0.3	1.0063	0.998568	0.996564	0.988399	0.992598	0.991996	0.996566	0.995156	1.00351	0.989001	0.996462	1.00479	0.992479			0.3	0.999792	1.00471	1.00015	0.995603	1.00466	0.98871	0.993393	0.999488	1.00019	0.995878	1.00054			0.3	0.993744	0.992234	0.99853	1.00839	0.997713	0.991195	1.00478	0.994682	0.999738	1.00141			0.3	0.997729	0.998826	0.992059	1.0003	0.998458
	0.4	1.00173	1.00394	0.988028	0.9906	0.992598	0.994251	0.997857	0.995156	0.999976	0.98524	0.994369	1.00479	0.991482			0.4	1.00095	1.00471	1.00332	0.992491	1.00108	0.994412	0.993393	0.998324	0.998859	0.989962	0.99267			0.4	0.992513	0.99562	0.99682	1.01189	0.998762	0.991195	1.00179	1.00138	0.999738	1.00141			0.4	1.00175	1.00016	0.993171	0.998015	1.00245
	0.5	0.993748	0.997674	0.99443	0.992802	0.995214	0.991996	0.995275	0.996298	1.00233	0.988061	0.996462	1.00151	0.996469			0.5	0.999792	1.00824	1.00438	0.994566	1.00227	0.996693	0.99459	0.998324	0.998859	0.99292	0.99267			0.5	0.999901	1.00014	0.999384	1.00606	1.00191	0.996977	0.995822	0.993726	1.00093	1.00141			0.5	0.999739	0.996159	0.994283	1.00486	1.00112
	0.6	1.00288	1.00125	0.99443	0.999406	0.993906	0.994251	0.999148	0.992871	1.00115	0.992761	0.996462	1.0037	0.995471			0.6	0.999792	1	0.99909	0.99664	1.00108	0.996693	0.992196	0.995997	0.998859	0.995878	0.99267			0.6	0.997439	0.997878	0.99511	1.00373	0.997713	0.993673	1.00279	1.00138	0.996172	0.999555			0.6	0.999739	1.00016	0.99762	1.00258	1.00378
	0.7	0.99603	0.997674	0.995497	0.991701	0.995214	0.996505	1.00173	0.998583	1.00351	0.992761	0.996462	1.00479	0.999461			0.7	1.00095	1.00471	1.00544	0.993529	1.00108	1.00125	0.995787	0.999488	1.00019	0.995878	0.993794			0.7	0.991282	0.994491	0.99853	1.00606	0.998762	0.988717	1.00179	0.999464	0.994983	0.99585			0.7	0.997729	1.00149	0.99762	1.00942	1.00245
	0.8	0.999452	0.999463	0.995497	0.999406	0.995214	0.995378	0.996566	0.997441	1.00115	0.993701	1.00065	1.0026	0.993477			0.8	0.99632	1.00588	0.99909	0.992491	1.00227	0.997833	0.993393	0.998324	1.00019	0.996864	0.991546			0.8	0.996207	1.00352	0.999384	1.00023	1.00191	0.997803	0.998806	0.995639	0.999738	1.00048			0.8	0.998734	0.993492	0.995396	1.006	0.999787
	0.9	0.998311	1.00036	0.997631	1.00051	0.995214	0.993124	1.00044	0.995156	0.999976	0.991821	1.00065	1.0026	0.991482			0.9	0.997477	1.00471	1.00121	0.993529	0.998686	0.998974	1.00057	0.998324	1.00019	1.00179	0.996043			0.9	0.997439	0.999007	1.00366	1.0049	1.00191	0.997803	0.999801	0.999464	1.0033	1.00233			0.9	0.996724	0.998826	0.998732	1.00486	0.997128
	1	1.00059	0.999463	0.995497	0.996104	0.997829	0.994251	1.00044	0.999726	0.997624	0.991821	0.997509	1.00151	0.995471			1	0.999792	1.00353	0.99909	0.995603	0.999881	0.997833	0.999378	0.997161	1.00151	0.998837	0.994919			1	1.00113	1.00014	1.00109	1.00256	1.00506	0.998629	0.999801	0.999464	1.0033	1.00233			1	0.999739	1.00416	0.996508	1.00486	0.995799
	1.1	1.00173	0.998568	0.99443	0.997204	0.992598	0.995378	1.00173	0.997441	0.9988	0.989001	1.00065	1.0037	1.00245			1.1	0.998635	1.00471	1.00332	0.998714	1.00466	1.00125	0.993393	0.995997	0.997533	0.998837	0.996043			1.1	0.999901	0.999007	0.99853	1.00023	1.00296	0.996977	0.999801	0.998508	1.00093	1.00048			1.1	0.99572	1.00016	1.00096	1.00714	0.99314
	1.2	1.00173	1.00215	0.985894	0.997204	0.993906	0.996505	1.00302	0.998583	0.999976	0.989001	0.997509	1.0037	1.00644			1.2	1.00211	1.00471	1.00226	0.992491	0.997491	0.995553	0.996984	0.997161	1.00019	1.00377	0.994919			1.2	0.997439	1.00352	0.999384	1.00023	0.997713	0.996977	0.999801	0.997552	0.997361	0.998629			1.2	0.99572	1.00283	0.999844	1.01056	0.995799
	1.3	1.00173	0.999463	0.993363	1.00161	0.996521	0.996505	0.999148	1.00201	0.9988	0.990881	0.999602	0.999322	1.00844			1.3	1.00211	1.00471	1.00332	0.995603	0.999881	0.998974	0.999378	0.997161	0.998859	1.00278	0.999415			1.3	1.0036	1.00465	0.99682	0.996736	0.999811	0.993673	1.00279	0.998508	0.999738	1.00048			1.3	0.999739	1.00283	0.995396	1.00714	0.997128
	1.4	1.00059	0.997674	0.99443	1.00161	0.992598	0.999887	1.00173	0.995156	0.996447	0.989001	0.997509	1.00042	1.00744			1.4	1.00211	1	0.99909	0.99664	0.997491	1.00011	1.00417	0.998324	1.00151	1.00377	0.999415			1.4	0.99867	1.00352	0.99853	0.994404	0.997713	0.993673	0.999801	0.996595	1.0033	1.00419			1.4	0.997729	1.00816	0.999844	1.0117	0.999787
	1.5	0.998311	1.00573	0.993363	1.00051	0.995214	0.996505	1.00173	1.00658	1.00468	0.991821	0.999602	1.00042	1.00545			1.5	1.00326	1.00235	0.998031	0.99664	1.00227	1.00011	0.998181	0.997161	1.00151	0.994892	0.997167			1.5	0.99867	0.99562	1.00195	0.99557	1.00296	1.00441	0.992837	0.996595	1.0033	0.999555			1.5	0.996724	1.00683	1.00096	1.01056	0.994469
	1.6	0.99603	1.00304	0.995497	1.00271	0.996521	1.00101	1.00044	0.998583	0.996447	0.994641	0.999602	1.00588	1.00944			1.6	0.999792	1.00706	1.00226	0.995603	0.999881	0.998974	0.999378	0.999488	1.00019	0.999823	1.00054			1.6	1.00852	1.00465	0.99853	0.999067	0.999811	0.995325	0.998806	1.00425	1.0033	1.00326			1.6	1.00175	1.00816	0.999844	1.00372	0.999787
	1.7	0.993748	0.999463	0.997631	1.00271	0.999137	1.00101	1.00044	1.00201	0.9988	1.00686	1.0017	1.00151	1.00345			1.7	0.998635	0.996471	0.99274	0.99664	0.999881	0.997833	0.996984	1.00182	1.00549	0.996864	0.997167			1.7	1.00606	0.997878	0.999384	1.0049	1.00296	1.00606	1.00776	0.998508	1.00093	1.00048			1.7	0.997729	1.00549	0.998732	1.00486	1.00112
	1.8	0.99603	1.00394	0.991229	1.00161	0.989982	0.99876	0.999148	1.00315	0.9988	1.00028	0.996462	0.997135	1.00445			1.8	1.00326	1.00588	1.00332	0.998714	0.999881	0.997833	0.998181	1.00182	1.00549	0.999823	1.00054			1.8	1.00236	1.00239	0.99853	1.00373	1.00296	1.00358	1.00279	1.00042	1.00093	0.996776			1.8	0.998734	1.00283	0.99762	1.006	0.999787
	1.9	1.00288	1.00573	0.99443	0.999406	0.993906	0.995378	0.996566	1.00201	0.996447	1.00498	1.00065	0.998229	0.999461			1.9	0.998635	1.00471	1.00121	0.998714	1.00227	1.00354	1.00177	0.999488	1.00019	0.996864	0.998291			1.9	0.997439	0.993363	1.0028	1.00256	1.00086	0.996151	0.997811	0.998508	1.00568	1.00326			1.9	1.00275	1.00816	1.00207	1.00372	1.00112
	2	0.999452	1.00304	0.998698	1.00711	1.00175	0.99876	1.00044	1.0043	1.00468	1.00404	1.0017	1.00151	1.00445			2	1.00442	1.00941	1.00121	0.999751	1.00585	0.996693	1.00297	1.00414	1.00151	0.996864	0.998291			2	1.00113	1.00126	0.99853	0.99557	0.995615	1.00358	0.999801	0.994682	0.99855	0.994923			2	1.00376	1.00149	1.00207	0.996875	1.00511
	2.1	0.99717	0.998568	0.999765	1.00381	1.00044	0.996505	0.996566	1.00887	1.00586	1.00216	1.0017	1.00042	1.00345			2.1	0.999792	1.00706	1.00332	1.00286	1.00346	0.996693	1.00177	1.00182	1.00151	0.994892	0.996043			2.1	1.00483	1.00917	0.99853	0.997902	0.998762	1.00028	1.00179	0.996595	1.00093	0.996776			2.1	1.00175	1.00016	1.00318	0.993453	1.00378
	2.2	0.998311	1.00036	0.999765	1.00271	1.00044	1.00101	1.00302	1.00087	1.00115	1.0031	1.00274	0.999322	1.00545			2.2	0.994006	1.00118	0.996973	0.999751	0.999881	0.998974	1.00177	1.00298	1.00019	0.989962	0.998291			2.2	1.00236	1.00239	1.0028	1.0014	0.998762	1.00524	1.0008	0.997552	0.999738	0.997703			2.2	1.00275	1.00016	1.00985	0.998015	1.00378
	2.3	1.00059	0.999463	0.996564	0.996104	1.00175	0.99876	0.997857	1.00658	1.00704	1.00122	0.999602	1.00151	1.00545			2.3	1.00326	1.00118	0.99909	1.00183	1.00227	0.997833	1.00417	0.997161	0.996206	0.990948	1.00166			2.3	0.99867	0.999007	1.0028	1.00373	1.00401	1.00606	1.00478	0.998508	0.996172	0.991218			2.3	0.996724	1.00416	0.999844	0.993453	1.00245
	2.4	0.999452	0.992305	0.997631	0.997204	0.997829	1.00214	0.999148	1.00544	1.00233	1.00404	1.00274	1.00151	1.00146			2.4	1.00442	1.00471	0.998031	1.00494	1.00227	1.00011	0.998181	0.998324	0.996206	0.995878	0.999415			2.4	0.99867	1.00014	0.995965	0.996736	0.999811	1.00441	0.995822	0.995639	1.0033	0.998629			2.4	0.996724	1.00016	1.00763	1.0003	0.998458
	2.5	1.00059	0.995884	0.997631	0.996104	1.00044	1.00214	1.00044	1.00658	0.999976	1.00404	1.00379	0.997135	1.00545			2.5	0.997477	1	1.00015	1.00079	0.993908	0.998974	1.00057	0.999488	0.997533	0.996864	1.00391			2.5	0.999901	0.999007	0.997675	0.99557	0.993516	1.00193	0.993832	0.992769	1.00093	1.00419			2.5	0.994715	1.00016	1.00429	0.993453	0.998458
	2.6	1.00059	0.9932	0.997631	0.997204	0.997829	1.00101	1.00044	1.00201	1.00351	1.00404	0.999602	1.00042	0.996469			2.6	0.998635	1.00235	0.995915	1.00079	0.996297	1.00354	1.00057	0.998324	0.998859	0.995878	1.00054			2.6	1.0036	1.00126	0.997675	0.993239	1.00401	0.999455	0.996817	1.00042	1.00093	0.996776			2.6	0.996724	1.00149	1.00429	0.995734	1.00378
	2.7	0.99603	0.9932	0.995497	0.991701	0.999137	1.00214	0.999148	1.00201	1.00468	1.00028	0.999602	0.997135	0.996469			2.7	0.997477	1.00235	0.995915	1.00286	1.00227	1.00354	1.00297	0.998324	0.99488	0.999823	1.00054			2.7	1.0036	0.999007	0.997675	0.992073	0.994566	1.00441	1.0008	1.00042	0.999738	0.990292			2.7	0.997729	1.00549	1.00318	0.996875	1.00112
	2.8	1.00402	0.992305	0.998698	0.998305	1.00044	0.999887	0.996566	0.994013	0.991741	1.0031	1.00065	1.00151	0.998464			2.8	0.99632	1.00235	0.994856	1.00286	0.998686	1.00125	1.00297	1.00182	1.00019	1.00179	1.00279			2.8	1.0036	0.997878	1.00366	1.0014	0.999811	0.998629	0.997811	0.999464	1.00449	1.00233			2.8	0.999739	1.00149	1.00652	0.995734	1.00245
	2.9	0.998311	0.99141	1.0019	0.999406	1.00568	1.00101	0.999148	1.00315	0.999976	1.00404	0.999602	1.00042	0.999461			2.9	0.999792	1.00235	0.99909	1.00286	0.998686	1.00582	1.00417	1.00065	1.00019	1.00672	1.00504			2.9	0.999901	0.999007	1.00024	0.99557	0.998762	1.00193	0.998806	0.994682	1.00212	1.00419			2.9	1.00074	1.00149	1.00541	0.995734	1.00378
	3	1.0063	1.00036	1.00083	0.999406	1.00306	1.00327	0.993984	1.00087	0.991741	1.0031	1.00065	1.00151	1.00345			3	0.999792	1.00118	0.99909	1.00183	0.996297	1.00354	1.00536	1.00182	1.00019	1.00771	1.00616			3	0.99867	1.00126	1.00024	0.99557	1.00191	0.994499	0.994827	0.999464	1.00093	1.00326			3	0.99572	1.00149	1.00429	0.998015	1.00245
	3.1	1.00173	1.00036	1.00083	0.995003	0.997829	1.00327	1.00173	1.00315	0.996447	1.00592	1.00274	0.999322	1.00245			3.1	0.997477	1.00235	1.00121	1.00183	0.997491	1.00239	0.998181	0.999488	0.997533	1.00672	1.00391			3.1	1.0036	1.00352	0.99853	0.99557	1.00401	1.00111	0.997811	0.997552	1.00212	1.00419			3.1	0.994715	1.00016	1.00429	0.998015	0.998458
	3.2	1.00744	1.00036	1.00297	0.998305	0.995214	1.0044	1.00431	1.00315	1.00115	1.00404	1.00065	0.998229	0.996469			3.2	1.00326	0.997647	0.998031	1.00079	0.997491	1.00239	1.00417	1.00065	0.998859	1.00672	1.00166			3.2	1.00236	1.00578	0.997675	0.994404	1.00086	1.00441	1.00179	0.997552	0.99855	1.00141			3.2	0.999739	1.00016	1.00874	0.998015	0.998458
	3.3	0.998311	0.995884	1.00083	0.9906	0.996521	1.00552	1.00173	0.999726	1.00115	1.0078	1.0017	0.994949	1.00146			3.3	1.00211	1.00235	1.00332	1.00079	0.998686	1.00468	1.00177	1.00182	0.998859	0.998837	1.00279			3.3	1.00236	1.00239	0.994255	0.990907	0.996664	1.00276	1.00378	1.00616	0.999738	1.00326			3.3	0.999739	1.00149	1.00985	0.995734	0.997128
	3.4	0.99717	0.995884	1.00403	0.996104	0.999137	1.00552	1.00173	1.00315	0.9988	1.00592	0.998556	1.00042	1.00245			3.4	1.00211	0.998824	0.995915	1.00183	0.999881	1.00468	1.00297	1.00182	0.997533	0.999823	0.999415			3.4	0.997439	1.00126	0.997675	0.996736	0.991418	1.00028	0.999801	1.00138	0.997361	1.00233			3.4	1.00376	0.997493	1.00763	0.996875	0.998458
	3.5	1.00059	0.999463	1.00937	0.993902	1.00044	1.00327	0.999148	1.00201	0.997624	1.00592	0.998556	0.997135	0.999461			3.5	1.00211	0.997647	0.998031	1.0039	1.00466	1.00239	1.00177	1.00531	0.998859	1.00278	0.996043			3.5	1.00113	1.00126	0.99682	0.996736	0.994566	0.996977	1.00478	1.00616	1.00212	1.00233			3.5	1.00577	1.00283	1.00318	0.999156	0.999787
	3.6	1.00059	0.995884	1.00083	0.997204	1.00306	1.00214	1.00302	0.997441	1.00115	1.00216	0.998556	0.996042	0.995471			3.6	0.997477	0.994118	0.99909	1.00079	0.997491	1.00582	1.00297	1.00414	0.998859	1.00278	0.994919			3.6	1.0036	1.00126	0.99682	0.997902	1.00191	0.996151	1.00179	1.0052	0.994983	0.999555			3.6	1.00677	0.998826	0.999844	0.992312	0.995799
	3.7	0.99717	0.995884	1.0051	0.995003	1.00306	1.00101	0.997857	1.00544	1.00115	1.00592	0.999602	0.993855	1.00245			3.7	0.99632	0.997647	1.00015	1.00701	1.00346	1.00125	0.996984	1.00298	0.99488	1.00081	0.996043			3.7	1.00113	1.00126	0.997675	0.996736	0.996664	0.998629	0.995822	0.999464	0.999738	1.00048			3.7	1.00376	1.00016	0.996508	1.0003	1.00378
	3.8	1.00288	1.00304	1.0019	0.997204	1.00568	1.00327	1.00302	0.995156	0.992918	1.00686	1.00065	0.994949	1.00146			3.8	0.995163	0.994118	0.996973	1.0039	0.999881	1.00468	1.00417	1.0088	1.00284	1.00475	1.00504			3.8	1.00483	0.997878	1.0028	0.997902	1.00191	0.998629	1.00279	1.00329	1.00093	0.997703			3.8	1.00376	0.998826	0.990947	0.994594	0.994469
	3.9	0.998311	1.00036	1.00297	0.999406	0.996521	1.00552	0.999148	0.996298	0.9988	1.00874	1.00379	0.997135	1.00146			3.9	1.00211	0.994118	1.00015	1.00494	1.00227	0.998974	0.996984	1.00298	0.997533	1.00377	0.997167			3.9	0.999901	0.997878	1.00451	1.00256	1.00191	1.00441	1.00577	1.00712	0.997361	1.00048			3.9	1.00275	0.997493	0.996508	0.994594	1.00112
	4	1.00059	1.00304	1.00403	0.999406	0.996521	1.00778	1.00173	0.997441	0.9988	1.00404	1.00065	0.994949	1.00245			4	1.00211	0.990588	0.99909	1.00597	1.00585	1.00468	1.00417	0.999488	0.998859	1.00574	1.00616			4	0.999901	1.00014	1.00537	1.00023	1.00296	1.00193	0.998806	0.999464	1.00212	1.00141			4	1.00175	0.996159	0.992059	0.995734	0.994469
	4.1	1.00173	1.00304	0.998698	1.00381	0.999137	1.0044	1.00173	0.998583	0.999976	1.00592	1.00484	0.998229	0.999461			4.1	1.00442	0.988235	0.993798	1.01012	1.00585	1.00582	1.00656	1.00065	1.00151	1.00475	1.00054			4.1	1.00113	0.996749	1.00622	1.00023	0.996664	1.00606	0.999801	1.0052	1.00093	1.00141			4.1	1.00376	0.996159	0.99762	0.994594	0.998458
	4.2	1.00288	1.00304	0.999765	1.00381	1.00044	1.00327	1.00302	0.996298	0.9988	1.0078	1.00379	0.999322	0.998464			4.2	0.999792	0.991765	1.00226	1.00494	1.00108	0.998974	1.00417	0.999488	1.00284	1.00574	1.00616			4.2	0.99867	1.00014	1.00537	1.00373	1.00611	1.00441	1.00179	1.00329	1.00212	0.997703			4.2	1.00376	0.994826	0.999844	0.998015	0.998458
	4.3	1.00059	1.00036	1.0051	1.00931	1.00306	0.999887	1.00173	0.997441	0.997624	1.00498	0.999602	0.998229	1.00146			4.3	1.00442	0.994118	1.00015	1.00701	1.00227	1.00125	1.00536	0.999488	0.998859	1.00574	1.00504			4.3	1.00113	1.00014	1.00451	1.00373	1.00506	1.00937	1.00279	1.00425	0.99855	1.00048			4.3	1.00275	0.993492	0.998732	0.993453	0.994469
	4.4	1.00059	1.00125	1.00297	1.00711	1.00306	1.00214	1.00044	1.00315	0.997624	1.0078	1.00379	0.999322	0.998464			4.4	1.00095	0.992941	1.00015	1.00597	1.00227	0.998974	1.00057	1.00065	1.00151	1.00672	1.00279			4.4	0.999901	0.997878	1.00366	0.999067	1.00506	1.01184	1.00179	1.00616	1.00212	1.00233			4.4	1.00074	0.996159	0.999844	1.00144	1.00112
	4.5	1.00173	1.00304	1.0051	1.00491	1.00306	1.00665	1.00173	0.999726	0.997624	1.00498	1.00379	0.999322	0.998464			4.5	1.00095	0.991765	1.00121	1.00597	0.995102	0.996693	1.00417	1.00065	1.00284	1.00771	1.00728			4.5	0.99867	0.99562	1.00537	1.00023	0.995615	1.00606	1.00179	1.00903	0.99855	0.998629			4.5	1.00074	0.996159	1.00096	1.0003	0.998458
	4.6	0.998311	1.00036	1.0051	1.00931	1.0096	1.00327	0.997857	0.994013	0.9988	1.00498	1.00379	1.0026	1.00245			4.6	0.994006	0.992941	1.00121	1.01012	1.00227	1.00011	1.00417	0.998324	1.00151	1.00475	1.00616			4.6	0.993744	0.997878	1.00109	0.99557	0.995615	1.00028	1.0008	1.00425	0.997361	1.00233			4.6	1.00275	0.994826	1.00318	1.0003	1.00511
	4.7	0.998311	1.00841	1.00617	1.00931	1.00568	1.00891	0.999148	0.998583	0.996447	1.00498	1.00274	0.993855	0.993477			4.7	1.00326	0.992941	1.00121	1.00079	0.995102	1.00011	0.996984	1.00182	1.00682	1.00081	1.00504			4.7	0.999901	1.00239	1.00109	1.00256	0.998762	1.00111	0.994827	1.00425	0.999738	0.997703			4.7	1.00577	0.997493	1.00207	0.993453	1.00112
	4.8	0.999452	1.00841	1.00083	1.00711	1.00437	1.00665	1.0056	1.00087	1.00115	1.00404	0.999602	0.999322	0.997466			4.8	0.997477	0.992941	1.00226	0.998714	0.993908	1.00011	1.00057	1.00065	1.00284	1.00081	1.00728			4.8	1.00113	1.00578	1.00537	1.00023	1.00296	1.00441	0.996817	1.00616	0.994983	0.993997			4.8	1.00175	0.993492	0.99762	0.999156	1.00378
	4.9	0.999452	1.00573	1.0051	1.00931	1.00829	1.0044	1.00173	0.999726	1.00351	1.00216	0.998556	0.998229	1.00046			4.9	0.999792	0.992941	1.00332	0.995603	0.987935	1.00239	1.00297	0.994834	0.997533	1.00574	1.00953			4.9	0.999901	1.00014	0.99511	1.0014	1.00086	1.00524	0.989853	0.997552	0.993795	0.996776			4.9	0.997729	0.997493	1.00207	1.00144	1.00643
	5	0.99717	1.00394	1.00937	1.00601	1.00437	0.99876	0.999148	1.00201	1.00704	1.00216	0.995415	0.999322	0.997466			5	0.999792	0.989412	0.995915	1.00079	0.993908	0.998974	0.996984	0.995997	1.00284	0.99785	1.00166			5	1.0036	1.00014	0.99682	0.997902	0.996664	1.00937	0.990848	1.00042	0.996172	1.00141			5	0.99572	0.993492	0.994283	0.999156	0.995799
	5.1	0.99717	0.994989	1.00723	1.00711	1.00829	0.996505	0.997857	1.00087	0.999976	1.00404	0.997509	0.997135	0.995471			5.1	1.00211	0.994118	0.99909	1.00079	0.993908	0.998974	1.00177	0.998324	1.00151	1.00278	1.00279			5.1	1.00113	1.00014	0.999384	0.996736	0.998762	1.00524	0.998806	1.00712	0.999738	0.997703			5.1	0.992705	0.990825	0.99762	0.992312	0.999787
	5.2	0.999452	1.00573	1.0051	1.00161	1.00437	0.997633	0.999148	1.00087	0.999976	1.00122	0.997509	1.0026	1.00046			5.2	0.99632	0.994118	1.00332	1.00079	0.998686	1.00011	1.00057	0.998324	1.00682	1.00278	1.00054			5.2	0.99867	1.00352	1.01135	0.997902	1.00611	1.00854	0.998806	1.0052	1.0033	0.999555			5.2	0.99371	0.990825	0.992059	0.993453	0.998458
	5.3	0.993748	1.00304	1.0051	1.00161	1.00698	0.997633	0.992694	0.999726	1.00115	0.997462	0.995415	1.0026	1.00046			5.3	0.997477	0.996471	1.00121	0.99664	0.993908	1.00354	1.00177	0.998324	1.00549	1.00081	0.999415			5.3	0.996207	1.00014	0.99853	1.01655	1.00401	1.01184	0.993832	0.999464	0.999738	1.00326			5.3	0.999739	0.994826	0.993171	0.988891	0.998458
	5.4	0.998311	1.00483	0.997631	0.998305	1.00306	1.00101	0.995275	1.0043	1.00233	0.999342	1.00065	0.999322	0.998464			5.4	1.00211	0.990588	0.99909	0.990417	0.995102	1.00239	1.00297	1.00065	1.00549	0.999823	0.997167			5.4	1.00483	1.00126	1.00537	0.997902	1.00506	1.00606	1.0008	1.00807	1.00212	1.00604			5.4	0.999739	0.992159	0.989835	0.991172	1.00245
	5.5	0.999452	1.00304	1.0051	1.00161	1.00306	1.00214	0.999148	0.999726	0.996447	0.998402	0.995415	0.997135	1.00046			5.5	1.00095	0.989412	1.00015	0.99664	0.999881	1.00468	1.00177	0.998324	1.00284	1.00278	1.00279			5.5	0.99867	1.00578	1.01306	1.0014	1.00401	1.00937	0.999801	1.00903	1.00093	1.00789			5.5	0.999739	0.992159	0.994283	0.991172	0.999787
	5.6	0.992607	0.9932	1.0019	1.00161	1.00306	1.00327	0.993984	1.00201	0.9988	0.997462	0.997509	0.998229	0.998464			5.6	0.998635	0.988235	1.00015	0.995603	0.995102	1.00125	0.998181	0.997161	1.00284	0.99785	1.00279			5.6	1.00236	1.00804	1.01392	1.0049	1.00925	1.0168	1.00279	1.01285	1.00568	1.00697			5.6	0.997729	0.992159	0.996508	0.995734	1.00378
	5.7	1.00059	1.00125	1.0019	1.00271	1.00175	1.00665	0.995275	0.997441	0.995271	0.995581	0.996462	0.996042	0.992479			5.7	0.998635	0.994118	1.00332	0.995603	0.997491	1.00354	0.993393	0.997161	1.00284	0.99785	0.998291			5.7	1.00729	1.00578	1.01648	1.00023	1.01135	1.01928	1.01074	1.01572	1.00687	1.01345			5.7	0.999739	0.996159	0.992059	0.999156	1.00245
	5.8	1.00173	1.00036	1.0019	1.00491	1.00568	1.0044	0.996566	1.00087	0.997624	0.98712	0.996462	1.0026	1.00046			5.8	1.00326	0.990588	1.00756	0.998714	0.997491	1.00468	1.00057	0.999488	1.00682	0.994892	1.00166			5.8	1.00852	1.00691	1.02161	1.00256	1.01555	1.02506	1.01174	1.01572	1.01044	1.02364			5.8	1.00175	0.992159	0.996508	0.993453	1.00511
	5.9	0.993748	0.994989	1.00297	1.00161	1.00568	1.0044	0.996566	0.996298	0.997624	0.990881	0.996462	0.999322	0.998464			5.9	0.999792	0.991765	1.00756	0.995603	0.997491	1.00239	1.00417	1.00065	1.00417	0.995878	1.00166			5.9	1.00729	1.00917	1.0199	1.00606	1.0124	1.03332	1.01671	1.01572	1.00925	1.02457			5.9	1.00677	0.994826	0.998732	1.00144	1.00511
	6	0.990325	0.996779	1.0083	1.00601	1.00437	1.0044	0.996566	1.00087	0.996447	0.989001	0.994369	0.998229	0.991482			6	0.99632	0.988235	1.00967	0.997677	0.998686	1.00239	0.999378	0.997161	1.00284	0.99785	1.00504			6	1.00975	1.00352	1.02161	1.01306	1.01974	1.02589	1.02169	1.01668	1.00449	1.02457			6	1.00476	0.997493	0.995396	0.999156	1.00511
	6.1	0.99603	0.997674	1.00723	1.00601	1.00306	1.00214	0.990112	0.999726	0.995271	0.988061	0.996462	0.999322	0.990484			6.1	0.999792	0.991765	1.00756	0.991454	0.993908	1.00468	0.999378	0.994834	1.00682	0.989962	1.00279			6.1	1.00975	1.00691	1.02503	1.01539	1.01765	1.03002	1.01572	1.02051	1.01281	1.03105			6.1	1.01079	0.998826	0.995396	1.00486	1.00112
	6.2	0.993748	0.997674	1.0083	1.00821	1.00306	0.999887	0.98753	1.00201	0.990565	0.98524	0.995415	0.997135	0.990484			6.2	0.994006	0.989412	1.0065	0.993529	0.995102	1.00125	1.00057	1.00065	1.00682	0.994892	1.00391			6.2	1.01222	1.01368	1.0276	1.01306	1.02604	1.03084	1.02169	1.02529	1.01519	1.03105			6.2	1.00577	1.00016	0.998732	1.00372	1.00245
	6.3	0.990325	0.997674	1.00937	1.00161	1.00044	0.996505	0.98753	1.0043	0.996447	0.98524	0.996462	0.999322	0.989487			6.3	0.998635	0.990588	1.00967	0.994566	0.999881	1.00239	1.00057	0.991343	1.00151	0.99292	1.00054			6.3	1.01591	1.01707	1.02503	1.01772	1.03233	1.04323	1.02169	1.02529	1.01519	1.03383			6.3	1.00878	1.00416	1.00429	1.0003	1.00643
	6.4	0.98462	0.998568	1.0051	1.00271	1.00437	0.999887	0.992694	0.999726	0.990565	0.9843	0.985995	0.998229	0.987492			6.4	0.999792	0.989412	1.00862	0.994566	0.997491	1.00582	0.999378	0.99367	1.00682	0.989962	1.00616			6.4	1.01468	1.02045	1.02161	1.01422	1.02919	1.04984	1.02268	1.02529	1.01163	1.03754			6.4	1.01682	1.00683	1.00429	1.00258	0.997128
	6.5	0.988043	1.00036	0.999765	1.00161	1.00044	0.997633	0.992694	1.00087	0.995271	0.98618	0.990182	0.996042	0.983502			6.5	1.00211	0.992941	1.01285	0.993529	0.995102	1.00582	1.00297	0.995997	1.00682	0.994892	1.00391			6.5	1.0196	1.02384	1.02161	1.01306	1.03024	1.04901	1.02368	1.0339	1.014	1.03383			6.5	1.01682	1.00683	1.00541	1.00258	0.999787
	6.6	0.98462	0.994094	1.0019	0.995003	1.00306	0.994251	0.991403	0.998583	0.991741	0.98242	0.987042	1.00042	0.987492			6.6	0.999792	0.989412	1.00862	0.995603	1.00346	1.00696	1.00297	0.997161	1.00549	0.993906	1.00279			6.6	1.02084	1.0261	1.02931	1.00956	1.03128	1.04158	1.02069	1.02911	1.01757	1.03568			6.6	1.01883	1.00549	1.00763	1.00714	1.00776
	6.7	0.990325	0.997674	1.00403	1.00051	0.999137	0.993124	0.98753	1.00315	0.995271	0.98242	0.984948	0.992762	0.981507			6.7	1.00095	0.991765	1.01179	0.99664	0.996297	1.00582	1.00417	1.00182	1.00682	0.993906	1.00166			6.7	1.0233	1.02497	1.03102	1.02005	1.03233	1.04406	1.02169	1.03772	1.01757	1.04032			6.7	1.02486	1.01083	1.01208	1.006	1.00643
	6.8	0.989184	0.998568	0.997631	1.00161	0.993906	0.990869	0.990112	1.00201	0.995271	0.978659	0.982855	0.993855	0.987492			6.8	1.00095	0.989412	1.0065	0.992491	0.991518	1.00582	1.00177	0.992507	1.00151	0.988976	1.00054			6.8	1.0196	1.02271	1.0276	1.01655	1.03128	1.04736	1.0197	1.0339	1.01638	1.04217			6.8	1.02586	1.01483	1.01097	1.00942	1.00112
	6.9	0.985761	0.997674	0.999765	0.997204	1.00437	0.993124	0.988821	0.995156	0.992918	0.977719	0.981808	0.993855	0.982504			6.9	0.997477	0.990588	1.00862	0.990417	0.997491	0.998974	0.998181	0.995997	1.00417	0.989962	0.999415			6.9	1.02207	1.02271	1.02503	1.01889	1.03653	1.04736	1.02069	1.03772	1.01281	1.03939			6.9	1.03189	1.01883	1.01319	1.00942	1.00378
	7	0.985761	0.994094	1.00403	0.997204	0.999137	0.994251	0.988821	0.999726	0.987036	0.973019	0.977621	0.991669	0.983502			7	1.00211	0.992941	1.00756	0.993529	0.996297	1.00125	1.00177	0.998324	1.00417	0.98799	0.997167			7	1.01714	1.02158	1.03016	1.01422	1.03233	1.05397	1.02467	1.03963	1.01519	1.03754			7	1.02988	1.01883	1.01319	1.00486	1.00643
	7.1	0.986902	0.987831	0.996564	1.00051	0.995214	0.988615	0.988821	0.999726	0.987036	0.98148	0.982855	0.988389	0.979512			7.1	0.997477	0.995294	1.01073	0.997677	1.00108	1.00125	1.00057	0.997161	1.00417	0.993906	1.00504			7.1	1.02084	1.02045	1.03444	1.02005	1.03128	1.05314	1.02069	1.03963	1.01876	1.04217			7.1	1.02888	1.0135	1.01541	1.01284	1.00776
	7.2	0.986902	0.988726	1.0019	0.995003	0.999137	0.98636	0.986239	0.994013	0.990565	0.973959	0.977621	0.991669	0.982504			7.2	0.998635	0.990588	1.00756	0.993529	1.00227	1.00011	1.00297	0.994834	1.00284	0.991934	1.00504			7.2	1.02699	1.02384	1.04384	1.02821	1.03548	1.04654	1.03064	1.04633	1.01757	1.03661			7.2	1.03691	1.0215	1.02098	1.00714	1.01175
	7.3	0.986902	0.99141	1.00297	0.999406	1.00044	0.984106	0.982366	0.990585	0.984683	0.973019	0.977621	0.986202	0.978515			7.3	0.999792	0.995294	1.00756	0.991454	1.00346	0.993272	0.995787	1.00182	1.00417	0.99292	1.00616			7.3	1.02576	1.02271	1.0276	1.03637	1.03443	1.0548	1.02865	1.04346	1.01757	1.04032			7.3	1.04093	1.02016	1.01986	1.01056	1.01441
	7.4	0.986902	0.992305	0.99443	0.993902	0.997829	0.984106	0.986239	0.992871	0.981153	0.973019	0.982855	0.990575	0.978515			7.4	0.998635	0.992941	1.00544	0.994566	1.00346	0.998974	1.00177	0.994834	1.00284	0.993906	1.00616			7.4	1.02576	1.02158	1.02589	1.02588	1.03443	1.05232	1.02567	1.04824	1.01519	1.03939			7.4	1.04194	1.03083	1.02654	1.01626	1.01308
	7.5	0.989184	0.99141	1.00403	0.9906	1.00568	0.982978	0.983657	0.994013	0.984683	0.972079	0.979715	0.987295	0.974525			7.5	0.994006	0.995294	1.00756	0.992491	1.00466	1.00125	0.999378	0.99367	1.00417	0.996864	1.00841			7.5	1.0233	1.02497	1.03102	1.02238	1.03758	1.05562	1.02567	1.04633	1.01876	1.04309			7.5	1.03691	1.02683	1.02098	1.01741	1.00776
	7.6	0.985761	0.9932	0.998698	0.988399	0.993906	0.985233	0.986239	0.994013	0.984683	0.969258	0.977621	0.987295	0.981507			7.6	0.99632	0.987059	1.00121	0.997677	1.00108	1.00239	1.00177	0.992507	1.00019	0.996864	1.00391			7.6	1.02207	1.02384	1.02418	1.02122	1.03443	1.05975	1.02865	1.0492	1.01876	1.04402			7.6	1.03691	1.02283	1.02654	1.01398	1.01441
	7.7	0.98462	0.994989	0.99443	0.988399	0.995214	0.981851	0.986239	0.998583	0.984683	0.970198	0.979715	0.986202	0.981507			7.7	0.995163	0.991765	1.00438	1.00079	1.00227	1.00125	0.996984	0.992507	1.00019	0.99785	1.00504			7.7	1.02946	1.0261	1.02589	1.02238	1.03338	1.06388	1.03164	1.04537	1.01638	1.0468			7.7	1.04194	1.02416	1.02987	1.01855	1.0184
	7.8	0.982338	0.994094	1.00083	0.9895	0.997829	0.985233	0.986239	0.991728	0.987036	0.969258	0.979715	0.986202	0.975522			7.8	0.995163	0.990588	1.00544	0.993529	0.990324	1.00125	0.998181	0.992507	0.997533	0.995878	1.00391			7.8	1.02946	1.02158	1.02589	1.01889	1.03863	1.06058	1.03164	1.05302	1.01757	1.04309			7.8	1.04294	1.0215	1.02209	1.02425	1.00776
	7.9	0.983479	0.9932	1.00617	0.987298	1.00044	0.979596	0.984948	0.991728	0.98233	0.968318	0.976575	0.985109	0.969537			7.9	0.998635	0.984706	1.00121	0.995603	0.998686	1.00239	0.999378	0.995997	1.00284	1.00475	1.01066			7.9	1.03315	1.02723	1.02418	1.02122	1.03338	1.06388	1.03263	1.0492	1.014	1.04217			7.9	1.04395	1.02283	1.02765	1.02311	1.01308
	8	0.980057	0.987831	1.00403	0.983996	0.999137	0.980724	0.984948	0.986015	0.981153	0.968318	0.976575	0.984015	0.97253			8	0.995163	0.985882	1.00332	0.994566	0.993908	1.00239	0.999378	0.998324	1.00151	0.999823	1.00504			8	1.02453	1.01707	1.02931	1.01772	1.03653	1.0581	1.03164	1.05494	1.01044	1.04309			8	1.04897	1.03083	1.02987	1.02539	1.01441
	8.1	0.981198	0.9932	1.00083	0.9895	1.00044	0.981851	0.983657	0.990585	0.9788	0.965498	0.975528	0.987295	0.974525			8.1	0.998635	0.989412	1.00862	0.994566	0.997491	1.00125	1.00057	0.99367	1.00019	0.996864	1.00391			8.1	1.02576	1.02497	1.02418	1.01889	1.03233	1.0581	1.0376	1.05207	1.01281	1.04124			8.1	1.04696	1.03217	1.02431	1.01969	1.01308
	8.2	0.98462	1.00125	0.998698	0.981795	0.993906	0.979596	0.984948	0.989443	0.981153	0.965498	0.976575	0.987295	0.975522			8.2	1.00095	0.987059	1.00226	0.995603	0.995102	1.00011	0.999378	0.99367	0.998859	0.99785	1.01066			8.2	1.0233	1.01933	1.02247	1.01772	1.03443	1.05645	1.03462	1.05111	1.01044	1.04309			8.2	1.04998	1.02816	1.0321	1.02425	1.01308
	8.3	0.975493	0.99141	0.997631	0.983996	0.999137	0.982978	0.98753	0.991728	0.983506	0.962677	0.974481	0.986202	0.97253			8.3	1.00211	0.989412	1.00438	0.995603	0.993908	1.00125	1.00057	0.994834	0.99488	0.999823	1.00391			8.3	1.02699	1.0261	1.02161	1.01422	1.03443	1.05975	1.0376	1.05589	1.01519	1.04958			8.3	1.04797	1.02683	1.03432	1.02653	1.01574
	8.4	0.977775	0.994989	0.995497	0.982896	0.995214	0.978469	0.984948	0.990585	0.977624	0.962677	0.974481	0.987295	0.97652			8.4	0.997477	0.989412	1.00015	0.997677	0.995102	0.996693	0.99459	0.994834	0.99488	0.99785	1.00279			8.4	1.02576	1.02045	1.02418	1.01189	1.03863	1.06636	1.03661	1.05494	1.01163	1.04958			8.4	1.04093	1.0255	1.03988	1.02539	1.0184
	8.5	0.975493	0.994094	0.999765	0.983996	1.00175	0.976215	0.981076	0.9883	0.981153	0.962677	0.969248	0.985109	0.974525			8.5	0.998635	0.992941	1.0065	0.998714	1.00108	0.997833	0.998181	0.989016	0.989574	0.999823	1.00616			8.5	1.0233	1.02497	1.02418	1.01655	1.03443	1.06636	1.0376	1.05685	1.014	1.04309			8.5	1.04194	1.02816	1.03877	1.02197	1.01175
	8.6	0.973211	0.994094	0.999765	0.977392	0.996521	0.979596	0.983657	0.987158	0.9788	0.964558	0.970295	0.984015	0.977517			8.6	0.999792	0.990588	1.0065	0.99664	0.996297	0.998974	1.00057	0.992507	0.996206	1.00081	1.00279			8.6	1.02207	1.02045	1.02332	1.01655	1.03548	1.06719	1.0376	1.05972	1.01163	1.04309			8.6	1.04495	1.03083	1.04099	1.02995	1.01574
	8.7	0.969788	0.99141	0.998698	0.980694	0.999137	0.97396	0.977203	0.986015	0.974095	0.962677	0.970295	0.984015	0.974525			8.7	1.00095	0.988235	1.00862	1.00183	1.00227	1.00239	1.00177	0.998324	0.998859	0.996864	1.00279			8.7	1.02207	1.02045	1.02076	1.01655	1.04283	1.06471	1.03561	1.05685	1.01163	1.04402			8.7	1.04194	1.02816	1.04544	1.03109	1.02505
	8.8	0.977775	0.9932	0.996564	0.979594	0.996521	0.980724	0.979785	0.9883	0.977624	0.964558	0.969248	0.984015	0.973527			8.8	1.00442	0.988235	1.00438	0.998714	0.992713	0.997833	0.998181	0.992507	0.996206	0.990948	1.00166			8.8	1.02084	1.01933	1.02674	1.01306	1.03863	1.07132	1.0376	1.06546	1.01519	1.04217			8.8	1.04093	1.0255	1.03432	1.01855	1.01574
	8.9	0.973211	0.9932	0.998698	0.980694	0.999137	0.978469	0.982366	0.987158	0.976448	0.965498	0.968201	0.979642	0.969537			8.9	1.00095	0.991765	1.00862	1.00079	0.998686	0.998974	0.999378	0.991343	0.996206	0.99292	1.00054			8.9	1.0196	1.01481	1.02247	1.01539	1.03863	1.0614	1.03561	1.06068	1.00687	1.03846			8.9	1.04093	1.0255	1.03766	1.02311	1.02505
	9	0.978916	0.997674	0.997631	0.979594	0.996521	0.978469	0.977203	0.990585	0.977624	0.968318	0.971341	0.980735	0.971532			9	0.994006	0.990588	1.00967	0.998714	0.999881	0.997833	0.998181	0.998324	0.997533	0.998837	1.00504			9	1.0233	1.02384	1.02332	1.01189	1.03653	1.06636	1.03661	1.06068	1.01519	1.0468			9	1.04093	1.02816	1.03877	1.02311	1.02638
	9.1	0.973211	0.994094	0.998698	0.980694	0.997829	0.977342	0.983657	0.986015	0.9788	0.964558	0.969248	0.979642	0.96455			9.1	0.999792	0.991765	1.00862	0.995603	0.997491	1.00354	1.00177	0.994834	0.998859	0.996864	1.00391			9.1	1.02207	1.02723	1.02076	1.01189	1.03863	1.05314	1.04158	1.06354	1.01281	1.04402			9.1	1.03691	1.02683	1.03766	1.01855	1.02372
	9.2	0.975493	0.995884	0.998698	0.978493	0.996521	0.978469	0.975912	0.98373	0.974095	0.961737	0.968201	0.978548	0.965548			9.2	0.99632	0.990588	1.00756	0.99664	0.999881	1.00011	0.99459	0.995997	0.997533	0.99785	1.00166			9.2	1.01837	1.02158	1.01819	1.01772	1.03863	1.05727	1.04357	1.06546	1.00925	1.04124			9.2	1.03691	1.02683	1.04767	1.02197	1.02505
	9.3	0.97207	0.9932	0.99443	0.978493	0.992598	0.976215	0.979785	0.980303	0.974095	0.963618	0.968201	0.978548	0.97253			9.3	0.999792	0.989412	1.00544	0.994566	0.997491	0.996693	0.99459	0.989016	0.993553	0.991934	1.00166			9.3	1.02084	1.02497	1.01819	1.01539	1.03548	1.06058	1.04158	1.06163	1.01163	1.04402			9.3	1.03892	1.03083	1.04767	1.02311	1.03037
	9.4	0.97207	0.99141	0.992296	0.978493	0.995214	0.978469	0.983657	0.98373	0.972918	0.963618	0.969248	0.976362	0.965548			9.4	0.998635	0.990588	1.00438	0.99664	1.00108	1.00468	1.00177	0.992507	0.99488	0.989962	1.00054			9.4	1.0196	1.02384	1.02845	1.01422	1.03863	1.0548	1.04457	1.0645	1.01163	1.04124			9.4	1.0329	1.0295	1.04211	1.02083	1.02638
	9.5	0.966365	0.988726	0.995497	0.976292	0.993906	0.976215	0.984948	0.98373	0.976448	0.961737	0.967154	0.979642	0.965548			9.5	1.00095	0.990588	1.00967	0.993529	0.998686	1.00582	1.00177	0.995997	0.996206	0.991934	1.00166			9.5	1.02453	1.02948	1.02845	1.01772	1.04283	1.0581	1.04357	1.05781	1.01163	1.04309			9.5	1.03892	1.03217	1.04322	1.02083	1.0317
	9.6	0.968647	0.989621	0.991229	0.97299	0.99129	0.981851	0.977203	0.984873	0.9788	0.961737	0.966108	0.971988	0.96056			9.6	0.998635	0.991765	1.00756	0.995603	0.999881	1.00696	0.999378	0.99367	0.997533	0.991934	1.00391			9.6	1.01837	1.01707	1.0276	1.01889	1.03024	1.06058	1.04258	1.06546	1.01519	1.04124			9.6	1.0329	1.03217	1.04656	1.01969	1.02771
	9.7	0.973211	0.985147	0.990162	0.976292	0.989982	0.975087	0.982366	0.978017	0.9788	0.957977	0.962968	0.976362	0.969537			9.7	0.998635	0.990588	1.00756	0.992491	1.00108	1.00125	0.995787	0.992507	0.996206	0.995878	1.00728			9.7	1.02576	1.02723	1.02674	1.01772	1.03653	1.05562	1.03959	1.06259	1.01876	1.04402			9.7	1.0339	1.03217	1.04656	1.02197	1.03037
	9.8	0.969788	0.986042	0.991229	0.980694	0.996521	0.975087	0.981076	0.980303	0.970565	0.957037	0.965061	0.976362	0.966545			9.8	0.995163	0.990588	1.00967	0.99664	1.00108	1.00125	1.00057	0.997161	1.00019	0.995878	1.00166			9.8	1.02207	1.02384	1.02418	1.02355	1.04073	1.0614	1.04158	1.06641	1.01757	1.04217			9.8	1.04093	1.03217	1.04544	1.02197	1.02904
	9.9	0.969788	0.986042	0.993363	0.980694	1.00044	0.97396	0.977203	0.982588	0.975271	0.957977	0.966108	0.975268	0.969537			9.9	0.997477	0.991765	1.00967	0.992491	0.997491	1.00582	1.00057	0.997161	0.99488	0.994892	1.00391			9.9	1.02453	1.02271	1.03016	1.01655	1.05227	1.05562	1.03959	1.06928	1.01281	1.04309			9.9	1.03591	1.02816	1.04878	1.02083	1.0317
	10	0.974352	0.985147	0.990162	0.976292	0.996521	0.970578	0.978494	0.97916	0.976448	0.960797	0.965061	0.975268	0.966545			10	0.997477	0.989412	1.00862	0.992491	0.997491	1.00239	1.00297	0.999488	1.00151	0.993906	1.00391			10	1.02453	1.02497	1.02845	1.01539	1.04492	1.05975	1.04059	1.06354	1.01163	1.03846			10	1.03591	1.0295	1.04989	1.02197	1.03302
	10.1	0.968647	0.982462	0.99443	0.980694	0.999137	0.975087	0.981076	0.975732	0.976448	0.960797	0.961921	0.974175	0.965548			10.1	1.00442	0.988235	1.01285	0.995603	0.998686	1.00239	0.998181	0.994834	0.998859	0.990948	0.999415			10.1	1.02453	1.03061	1.03187	1.01306	1.04597	1.04984	1.04457	1.0712	1.014	1.03568			10.1	1.0339	1.02816	1.04989	1.01741	1.02904
	10.2	0.970929	0.986042	0.992296	0.978493	0.995214	0.97396	0.981076	0.97916	0.970565	0.955157	0.962968	0.970895	0.963553			10.2	1.00211	0.989412	1.01285	0.993529	0.999881	1.00696	1.00417	0.998324	0.998859	0.993906	1.00728			10.2	1.02207	1.02045	1.02931	1.02238	1.04702	1.05562	1.04656	1.07215	1.01163	1.03846			10.2	1.0339	1.03083	1.03766	1.01626	1.02771
	10.3	0.964084	0.977989	0.991229	0.978493	0.996521	0.97396	0.979785	0.97916	0.975271	0.963618	0.966108	0.968708	0.963553			10.3	0.998635	0.987059	1.00756	0.993529	1.00227	1.00468	0.998181	0.99018	0.99488	0.999823	1.00841			10.3	1.03069	1.02271	1.03187	1.01655	1.04178	1.0581	1.04556	1.06928	1.01281	1.02827			10.3	1.03089	1.03217	1.03432	1.01626	1.02638
	10.4	0.965225	0.979778	0.993363	0.976292	0.993906	0.976215	0.981076	0.976875	0.970565	0.960797	0.961921	0.974175	0.965548			10.4	1.00211	0.991765	1.01179	0.994566	1.00227	1.00468	1.00177	0.997161	1.00151	0.99785	1.00279			10.4	1.02699	1.02271	1.03187	1.02122	1.04807	1.04406	1.05054	1.07215	1.01638	1.03754			10.4	1.03189	1.0335	1.03655	1.01398	1.02638
	10.5	0.969788	0.979778	0.992296	0.980694	0.987367	0.97396	0.978494	0.976875	0.974095	0.958917	0.964014	0.971988	0.961558			10.5	1.00095	0.985882	1.0065	0.992491	0.999881	1.00696	0.999378	0.997161	1.00151	0.993906	1.00391			10.5	1.02576	1.02045	1.0276	1.02238	1.04807	1.05727	1.04954	1.06546	1.01044	1.03013			10.5	1.03792	1.03217	1.04322	1.01741	1.0317
	10.6	0.965225	0.980673	0.991229	0.982896	0.989982	0.977342	0.979785	0.978017	0.969389	0.960797	0.966108	0.973082	0.965548			10.6	1.00095	0.990588	1.00967	0.993529	0.997491	1.00468	1.00297	0.997161	0.997533	0.994892	1.01291			10.6	1.02699	1.02271	1.02845	1.01889	1.04912	1.04901	1.04357	1.06354	1.00925	1.03105			10.6	1.03691	1.03483	1.04544	1.01741	1.02904
	10.7	0.965225	0.979778	0.993363	0.980694	0.99129	0.970578	0.978494	0.975732	0.971742	0.959857	0.962968	0.974175	0.963553			10.7	0.997477	0.988235	1.00544	0.990417	0.995102	1.00354	1.00057	0.994834	0.996206	0.996864	1.00504			10.7	1.02576	1.02158	1.02589	1.02005	1.04283	1.0548	1.04855	1.07215	1.00568	1.02457			10.7	1.03491	1.0295	1.04544	1.01284	1.02239
	10.8	0.965225	0.977094	0.993363	0.976292	0.993906	0.976215	0.977203	0.97459	0.968213	0.960797	0.962968	0.970895	0.959563			10.8	0.998635	0.992941	1.00756	0.98938	0.998686	1.0081	1.00177	0.994834	0.997533	0.995878	1.00728			10.8	1.02946	1.02497	1.03187	1.01889	1.05122	1.04901	1.05153	1.07024	1.00806	1.0329			10.8	1.02687	1.03483	1.03877	1.01626	1.02638
	10.9	0.95952	0.97083	0.99443	0.975191	0.989982	0.97396	0.983657	0.97459	0.970565	0.957037	0.959827	0.970895	0.96455			10.9	1.00095	0.990588	1.00756	0.991454	0.995102	1.00125	0.999378	0.998324	0.998859	0.996864	1.00953			10.9	1.02946	1.02723	1.03102	1.02471	1.04807	1.05975	1.04158	1.06737	1.01044	1.02827			10.9	1.03189	1.03483	1.04211	1.02197	1.0317
	11	0.964084	0.974409	0.989095	0.977392	0.986059	0.971706	0.974621	0.976875	0.969389	0.959857	0.958781	0.965428	0.959563			11	0.999792	0.989412	1.00226	0.995603	1.00108	1.00125	1.00177	0.99367	0.993553	0.994892	1.00953			11	1.0233	1.02158	1.03102	1.02005	1.04492	1.05975	1.04457	1.0712	1.01044	1.0292			11	1.03189	1.03483	1.03877	1.00372	1.02505
	11.1	0.961802	0.982462	0.993363	0.983996	0.986059	0.975087	0.981076	0.973447	0.967036	0.958917	0.959827	0.968708	0.957568			11.1	0.997477	0.988235	1.00967	0.992491	0.998686	1.00468	0.998181	0.99367	0.9909	0.994892	1.00728			11.1	1.02822	1.02271	1.02589	1.01655	1.04492	1.05562	1.04357	1.06833	1.01281	1.03105			11.1	1.0339	1.03217	1.04433	1.00828	1.0317
	11.2	0.957238	0.977094	0.995497	0.982896	0.987367	0.97396	0.978494	0.973447	0.967036	0.961737	0.961921	0.967615	0.961558			11.2	0.997477	0.988235	1.0065	0.991454	0.996297	1.00125	1.00057	0.991343	0.992227	0.996864	1.00391			11.2	1.01837	1.0182	1.02332	1.01655	1.04597	1.05149	1.03462	1.06163	1.01163	1.02827			11.2	1.03591	1.02816	1.04322	1.00828	1.03302
	11.3	0.958379	0.97083	0.995497	0.978493	0.989982	0.972833	0.975912	0.968877	0.968213	0.958917	0.960874	0.968708	0.957568			11.3	0.998635	0.987059	1.00967	0.995603	0.997491	1.00125	1.00177	0.998324	0.998859	0.995878	1.00504			11.3	1.02576	1.01933	1.02418	1.01306	1.05332	1.05562	1.04556	1.0712	1.01519	1.03198			11.3	1.0339	1.02816	1.04211	1.00828	1.0317
	11.4	0.95952	0.976199	0.99443	0.978493	0.99129	0.97396	0.978494	0.968877	0.967036	0.956097	0.960874	0.964335	0.95657			11.4	1.00095	0.990588	1.00438	0.990417	0.996297	1.00239	0.996984	0.997161	0.996206	0.998837	1.01178			11.4	1.02084	1.01933	1.03102	1.01655	1.05017	1.06058	1.04258	1.06833	1.00925	1.03198			11.4	1.03491	1.0255	1.04211	1.0117	1.03037
	11.5	0.962943	0.975304	0.990162	0.97299	0.987367	0.97396	0.977203	0.97002	0.96586	0.956097	0.959827	0.968708	0.959563			11.5	0.997477	0.983529	1.0065	0.98938	0.998686	0.998974	0.996984	0.998324	0.997533	0.995878	1.00953			11.5	1.02084	1.01594	1.03273	1.02005	1.05541	1.0548	1.04656	1.06928	1.00687	1.03198			11.5	1.03189	1.0255	1.04322	1.006	1.03037
	11.6	0.965225	0.969936	0.993363	0.979594	0.989982	0.972833	0.978494	0.972305	0.963507	0.959857	0.958781	0.963242	0.953578			11.6	0.994006	0.988235	1.00226	0.992491	0.998686	0.997833	0.992196	0.995997	0.997533	0.995878	1.00841			11.6	1.02084	1.01368	1.0276	1.01889	1.04702	1.05727	1.04855	1.07215	1.01163	1.03476			11.6	1.03089	1.02283	1.04433	1.01284	1.02904
	11.7	0.964084	0.969936	0.990162	0.97299	0.988675	0.970578	0.978494	0.968877	0.96586	0.956097	0.955641	0.964335	0.957568			11.7	0.999792	0.991765	1.00756	0.991454	1.00108	1.00239	0.996984	0.997161	0.997533	0.99785	1.01066			11.7	1.02084	1.01594	1.02931	1.01772	1.05017	1.0581	1.04457	1.07311	1.01044	1.03198			11.7	1.03089	1.0175	1.05212	1.01398	1.03037
	11.8	0.965225	0.968146	0.988028	0.978493	0.988675	0.968324	0.97333	0.973447	0.964683	0.959857	0.958781	0.963242	0.95657			11.8	0.995163	0.988235	1.00544	0.991454	1.00227	1.00239	0.998181	0.995997	0.997533	0.995878	1.00953			11.8	1.02576	1.02045	1.02674	1.01539	1.05122	1.05893	1.04755	1.07502	1.00806	1.03939			11.8	1.0339	1.02016	1.04878	1.01056	1.0317
	11.9	0.964084	0.963672	0.990162	0.976292	0.987367	0.971706	0.983657	0.973447	0.967036	0.955157	0.956687	0.966522	0.95657			11.9	0.998635	0.988235	1.00438	0.988343	0.993908	1.00582	1.00177	0.992507	0.993553	0.996864	1.01291			11.9	1.02207	1.01029	1.02589	1.01422	1.05017	1.06306	1.04954	1.07502	1.00568	1.03939			11.9	1.03591	1.01883	1.04989	1.01398	1.03701
	12	0.968647	0.966356	0.991229	0.97409	0.986059	0.969451	0.974621	0.97002	0.969389	0.959857	0.960874	0.966522	0.958565			12	0.995163	0.989412	1.0065	0.987306	0.991518	1.00125	0.999378	0.997161	0.992227	0.99292	1.00616			12	1.02946	1.01933	1.02332	1.01889	1.05227	1.05645	1.04258	1.0712	1.01163	1.03476			12	1.03189	1.02016	1.04989	1.0117	1.03302
	12.1	0.960661	0.961883	0.992296	0.976292	0.987367	0.970578	0.977203	0.966592	0.964683	0.957037	0.956687	0.965428	0.955573			12.1	0.997477	0.988235	1.00756	0.991454	0.998686	1.00125	1.00057	0.995997	0.99488	0.99292	1.00054			12.1	1.02822	1.01368	1.02674	1.01889	1.05646	1.06306	1.04059	1.06928	1.01281	1.03476			12.1	1.0339	1.0215	1.04878	1.01512	1.0317
	12.2	0.964084	0.965462	0.989095	0.976292	0.984751	0.967196	0.977203	0.967735	0.96233	0.955157	0.955641	0.962148	0.957568			12.2	0.998635	0.987059	1.00756	0.992491	0.997491	1.00239	0.996984	0.991343	0.996206	0.994892	1.01178			12.2	1.02453	1.00917	1.02931	1.02238	1.05332	1.0614	1.03661	1.06928	1.01044	1.03383			12.2	1.02888	1.02016	1.04767	1.0117	1.02904
	12.3	0.960661	0.959198	0.988028	0.977392	0.984751	0.970578	0.975912	0.967735	0.96586	0.957977	0.958781	0.964335	0.954575			12.3	0.99632	0.983529	1.00756	0.993529	0.995102	0.997833	0.996984	0.994834	0.992227	0.99292	1.01066			12.3	1.0196	1.00804	1.02332	1.02238	1.05017	1.05893	1.04059	1.06546	1.01519	1.03476			12.3	1.03491	1.02016	1.04433	1.01284	1.02904
	12.4	0.95952	0.960093	0.988028	0.976292	0.984751	0.967196	0.975912	0.966592	0.968213	0.957037	0.956687	0.959962	0.955573			12.4	0.998635	0.984706	1.00438	0.992491	0.993908	0.996693	0.996984	0.995997	0.992227	0.994892	1.00953			12.4	1.02576	1.01255	1.0276	1.02005	1.05541	1.05397	1.04158	1.07311	1.01163	1.03476			12.4	1.0339	1.0255	1.04656	1.01855	1.0317
	12.5	0.961802	0.962777	0.989095	0.979594	0.987367	0.969451	0.978494	0.964307	0.96233	0.951396	0.955641	0.959962	0.954575			12.5	0.992849	0.985882	1.01285	0.990417	0.993908	0.998974	1.00177	1.00065	0.996206	0.994892	1.00841			12.5	1.02207	1.0182	1.02589	1.02238	1.05227	1.05727	1.0386	1.07024	1.01281	1.03476			12.5	1.03089	1.02416	1.03766	1.0117	1.02771
	12.6	0.95952	0.962777	0.992296	0.976292	0.987367	0.970578	0.977203	0.964307	0.961154	0.952336	0.955641	0.961055	0.95258			12.6	0.995163	0.984706	1.00756	0.988343	0.993908	0.998974	0.999378	0.991343	0.9909	0.999823	1.01291			12.6	1.02453	1.01594	1.0276	1.02005	1.05227	1.05893	1.04258	1.07693	1.01044	1.03476			12.6	1.02988	1.02416	1.03988	1.01056	1.02638
	12.7	0.962943	0.964567	0.988028	0.97409	0.989982	0.969451	0.979785	0.963164	0.959977	0.955157	0.955641	0.959962	0.951583			12.7	0.997477	0.983529	1.00438	0.992491	0.992713	0.998974	0.998181	0.997161	0.9909	0.999823	1.01291			12.7	1.02576	1.01707	1.0276	1.01889	1.05332	1.05314	1.03959	1.06928	1.00568	1.03476			12.7	1.02385	1.0215	1.04656	1.01741	1.03037
	12.8	0.964084	0.960093	0.988028	0.97299	0.982136	0.968324	0.974621	0.971162	0.96233	0.955157	0.955641	0.954495	0.95258			12.8	0.998635	0.988235	1.00862	0.986269	0.989129	0.997833	0.999378	0.99367	0.9909	0.998837	1.01178			12.8	1.01837	1.01029	1.02845	1.01655	1.05332	1.05727	1.04357	1.07024	1.01044	1.04309			12.8	1.02888	1.02016	1.03877	1.01398	1.02771
	12.9	0.967506	0.960988	0.991229	0.981795	0.987367	0.970578	0.979785	0.968877	0.970565	0.954216	0.953547	0.958868	0.955573			12.9	0.998635	0.985882	1.01285	0.98938	0.992713	1.00125	1.00177	0.995997	0.992227	0.990948	1.00841			12.9	1.0233	1.01255	1.02503	1.01306	1.05017	1.05397	1.03959	1.07215	1.00568	1.0329			12.9	1.03089	1.01883	1.04433	1.01512	1.0317
	13	0.95952	0.959198	0.990162	0.982896	0.987367	0.967196	0.982366	0.963164	0.968213	0.951396	0.956687	0.957775	0.953578			13	1.00095	0.987059	1.01497	0.993529	0.995102	1.00239	0.998181	0.997161	0.99488	0.995878	1.01515			13	1.02084	1.01481	1.02161	1.01306	1.05227	1.05893	1.0386	1.0712	1.0033	1.03846			13	1.03591	1.02016	1.04656	1.01626	1.02771
	13.1	0.964084	0.960988	0.993363	0.978493	0.988675	0.967196	0.977203	0.964307	0.96233	0.954216	0.956687	0.957775	0.949588			13.1	1.00442	0.983529	1.01602	0.98938	0.991518	1.00125	0.996984	0.995997	0.993553	0.995878	1.01291			13.1	1.02207	1.01594	1.02332	1.02355	1.05017	1.05397	1.04357	1.07407	1.0033	1.03754			13.1	1.03189	1.02016	1.04656	1.01969	1.02904
	13.2	0.962943	0.962777	0.991229	0.976292	0.987367	0.970578	0.978494	0.965449	0.957625	0.950456	0.951454	0.958868	0.953578			13.2	1.00095	0.984706	1.00332	0.992491	0.990324	0.998974	1.00177	0.99367	0.9909	0.995878	1.0174			13.2	1.02207	1.01594	1.02247	1.01889	1.05437	1.05893	1.04258	1.07215	1.0033	1.03939			13.2	1.0329	1.02283	1.05323	1.01969	1.03037
	13.3	0.962943	0.963672	0.991229	0.978493	0.987367	0.969451	0.978494	0.968877	0.959977	0.950456	0.955641	0.953401	0.95258			13.3	0.99632	0.987059	1.01285	0.988343	0.993908	1.00125	1.00297	0.995997	0.992227	0.994892	1.00953			13.3	1.01591	1.00804	1.02418	1.01889	1.05122	1.05562	1.04357	1.07598	0.999738	1.03846			13.3	1.0329	1.02016	1.05212	1.01855	1.02771
	13.4	0.966365	0.961883	0.990162	0.976292	0.984751	0.969451	0.975912	0.968877	0.964683	0.952336	0.953547	0.955588	0.95258			13.4	0.998635	0.990588	1.01285	0.991454	0.996297	1.00011	0.996984	0.995997	0.989574	0.996864	1.01515			13.4	1.01222	1.00578	1.01819	1.00956	1.05437	1.06388	1.04556	1.07407	1.00687	1.03568			13.4	1.0339	1.0215	1.05212	1.02083	1.02904
	13.5	0.960661	0.961883	0.991229	0.979594	0.989982	0.969451	0.978494	0.966592	0.96233	0.954216	0.953547	0.953401	0.949588			13.5	1.00095	0.989412	1.00967	0.995603	0.998686	1.00354	1.00177	0.999488	0.99488	0.99785	1.01515			13.5	1.01714	1.00691	1.01905	1.01189	1.04912	1.06223	1.04656	1.0798	1.00568	1.0329			13.5	1.02988	1.01883	1.05879	1.02197	1.02904
	13.6	0.958379	0.960988	0.988028	0.979594	0.984751	0.967196	0.977203	0.968877	0.956448	0.953276	0.955641	0.954495	0.950586			13.6	0.999792	0.987059	1.01285	0.995603	0.998686	1.00582	1.00177	0.997161	0.99488	0.996864	1.00841			13.6	1.01714	1.01368	1.02503	1.01889	1.05541	1.05562	1.04158	1.07693	1.00449	1.03661			13.6	1.03491	1.02016	1.05434	1.02311	1.02372
	13.7	0.964084	0.960988	0.984827	0.977392	0.989982	0.964942	0.974621	0.963164	0.961154	0.948576	0.951454	0.954495	0.946596			13.7	1.00095	0.989412	1.01391	0.992491	0.995102	1.00011	1.00177	0.999488	0.9909	0.999823	1.00841			13.7	1.01714	1.01029	1.02247	1.01889	1.05332	1.0614	1.04158	1.08267	1.00449	1.03383			13.7	1.03189	1.01883	1.04989	1.01969	1.0184
	13.8	0.95952	0.960988	0.990162	0.976292	0.987367	0.967196	0.974621	0.97002	0.958801	0.952336	0.955641	0.961055	0.95657			13.8	0.999792	0.990588	1.01497	0.993529	0.997491	1.00125	0.995787	0.994834	0.989574	1.00278	1.01291			13.8	1.01222	1.00465	1.02418	1.01539	1.05227	1.05149	1.04258	1.07502	1.00925	1.04124			13.8	1.02988	1.02016	1.04878	1.02425	1.02106
	13.9	0.954956	0.955619	0.98376	0.980694	0.984751	0.966069	0.974621	0.966592	0.967036	0.946696	0.951454	0.954495	0.953578			13.9	1.00095	0.991765	1.01285	0.991454	0.996297	1.00125	0.998181	0.997161	0.9909	1.00179	1.01066			13.9	1.01714	1.00917	1.02418	1.00839	1.05437	1.05232	1.04258	1.07693	1.00806	1.04032			13.9	1.02888	1.01883	1.05434	1.03109	1.02904
	14	0.960661	0.95383	0.985894	0.97299	0.986059	0.969451	0.974621	0.967735	0.959977	0.948576	0.951454	0.958868	0.954575			14	0.998635	0.987059	1.00862	0.994566	0.998686	0.996693	0.996984	0.997161	0.9909	1.00081	1.01066			14	1.0196	1.01368	1.02076	1.0049	1.05227	1.05645	1.04755	1.07693	1.00449	1.04124			14	1.02586	1.0175	1.05657	1.02653	1.03037
	14.1	0.957238	0.957409	0.98376	0.971889	0.99129	0.967196	0.970748	0.967735	0.96586	0.950456	0.952501	0.953401	0.951583			14.1	0.997477	0.988235	1.00967	0.986269	0.991518	1.00239	0.999378	0.992507	0.989574	1.00179	1.00616			14.1	1.02084	1.00917	1.02845	1.00606	1.05227	1.05893	1.04158	1.07407	1.00687	1.04032			14.1	1.02486	1.02016	1.03988	1.02425	1.02904
	14.2	0.958379	0.955619	0.989095	0.979594	0.987367	0.964942	0.975912	0.968877	0.96586	0.951396	0.952501	0.955588	0.947593			14.2	0.994006	0.988235	1.00967	0.994566	0.995102	1.00354	0.995787	1.00182	1.00019	1.00179	1.00504			14.2	1.0196	1.01707	1.03016	1.01422	1.05227	1.0581	1.03959	1.07407	1.00687	1.03846			14.2	1.02687	1.0175	1.03766	1.02311	1.02904
	14.3	0.957238	0.959198	0.982693	0.97409	0.980828	0.962687	0.974621	0.967735	0.961154	0.950456	0.950407	0.955588	0.948591			14.3	0.995163	0.985882	1.00862	0.990417	0.993908	1.00011	0.995787	1.00298	1.00019	1.00475	1.01066			14.3	1.02576	1.0182	1.02161	1.01189	1.04178	1.04984	1.03959	1.07789	1.00806	1.03568			14.3	1.02988	1.0215	1.03099	1.02653	1.02505
	14.4	0.956097	0.956514	0.98376	0.976292	0.989982	0.966069	0.974621	0.962022	0.96586	0.949516	0.94936	0.953401	0.949588			14.4	0.99632	0.982353	1.00756	0.992491	0.999881	1.00125	0.995787	1.00182	1.00019	1.00278	1.01066			14.4	1.02084	1.01142	1.02503	1.01306	1.04283	1.04571	1.0376	1.07502	1.00568	1.03198			14.4	1.02787	1.0135	1.03988	1.02995	1.02771
	14.5	0.958379	0.955619	0.982693	0.975191	0.988675	0.964942	0.970748	0.963164	0.963507	0.945755	0.947267	0.952308	0.948591			14.5	0.995163	0.982353	1.0065	0.990417	0.998686	1.00125	0.996984	0.999488	0.998859	1.00278	1.00728			14.5	1.01837	1.01142	1.02418	1.01306	1.04387	1.05893	1.03959	1.08267	1.01281	1.03383			14.5	1.02787	1.0135	1.03655	1.02767	1.02372
	14.6	0.952674	0.952935	0.984827	0.976292	0.989982	0.964942	0.972039	0.968877	0.959977	0.948576	0.951454	0.953401	0.953578			14.6	0.995163	0.982353	1.00544	0.99664	0.999881	1.00011	0.993393	1.00182	1.00284	1.00475	1.00953			14.6	1.0233	1.01594	1.02161	1.00606	1.04492	1.04984	1.0386	1.07693	1.00568	1.0329			14.6	1.03089	1.01616	1.03655	1.02653	1.03037
	14.7	0.956097	0.951145	0.98376	0.97299	0.987367	0.963815	0.969458	0.97002	0.967036	0.944815	0.950407	0.953401	0.950586			14.7	0.994006	0.981176	1.00226	0.993529	0.999881	1.00011	0.992196	1.00414	1.00549	1.00179	1.00728			14.7	1.01714	1.01481	1.02247	1.00723	1.04283	1.05397	1.03462	1.07502	1.00687	1.03568			14.7	1.02988	1.01216	1.04322	1.02653	1.03701
	14.8	0.953815	0.950251	0.98376	0.967486	0.982136	0.960433	0.97333	0.965449	0.96233	0.947636	0.950407	0.953401	0.949588			14.8	0.994006	0.983529	1.0065	0.998714	1.00227	0.995553	0.996984	1.00531	1.00549	0.996864	1.00616			14.8	1.01837	1.01368	1.01477	1.00256	1.04178	1.05232	1.03561	1.07789	1.01163	1.02642			14.8	1.03189	1.01216	1.03655	1.02425	1.02904
	14.9	0.956097	0.952935	0.982693	0.97409	0.983444	0.966069	0.972039	0.965449	0.963507	0.946696	0.948314	0.947935	0.942606			14.9	0.999792	0.981176	1.00226	1.00079	0.999881	1.00239	1.00057	1.00531	1.00417	1.00377	1.01066			14.9	1.0233	1.01594	1.01306	1.00606	1.04283	1.06223	1.03064	1.06833	1.00687	1.03661			14.9	1.03591	1.01216	1.04656	1.02767	1.0317
	15	0.956097	0.950251	0.977359	0.975191	0.986059	0.964942	0.974621	0.964307	0.96586	0.944815	0.945174	0.951215	0.946596			15	0.994006	0.984706	1.00438	0.998714	0.999881	1.00239	0.993393	1.00182	1.00151	1.00278	1.00953			15	1.01591	1.00804	1.01905	1.01073	1.04387	1.0614	1.03462	1.07598	1.00212	1.03754			15	1.0329	1.0135	1.04322	1.02881	1.03037
	15.1	0.958379	0.95204	0.979493	0.968587	0.988675	0.959306	0.97333	0.957452	0.961154	0.944815	0.945174	0.946841	0.945598			15.1	0.994006	0.978824	1.00121	0.993529	0.996297	1.00239	0.995787	1.00182	0.998859	1.00574	1.00953			15.1	1.01714	1.00691	1.01648	1.0049	1.03968	1.05067	1.03462	1.07598	1.00687	1.03568			15.1	1.03792	1.01483	1.04656	1.02881	1.02904
	15.2	0.958379	0.95383	0.979493	0.965285	0.986059	0.960433	0.974621	0.958594	0.961154	0.946696	0.947267	0.944655	0.940611			15.2	0.99632	0.981176	1.00438	0.995603	0.997491	0.996693	0.993393	1.00182	0.998859	1.0087	1.01291			15.2	1.01098	1.00804	1.01905	1.00723	1.04912	1.05645	1.04059	1.07502	1.01638	1.03568			15.2	1.03089	1.01483	1.04544	1.02653	1.02771
	15.3	0.954956	0.951145	0.976292	0.970788	0.982136	0.96156	0.972039	0.965449	0.956448	0.945755	0.94622	0.946841	0.942606			15.3	0.990534	0.982353	1.00756	0.99664	0.997491	0.997833	0.99459	0.998324	0.998859	1.01067	1.01515			15.3	1.01714	1.01255	1.00793	1.00023	1.04387	1.05893	1.03263	1.06546	1.01163	1.03198			15.3	1.0329	1.02016	1.04544	1.02083	1.02372
	15.4	0.957238	0.95204	0.979493	0.969688	0.980828	0.963815	0.972039	0.964307	0.959977	0.946696	0.94936	0.951215	0.946596			15.4	1.00095	0.987059	1.00862	0.997677	0.998686	0.998974	0.993393	0.997161	0.99488	1.01165	1.01178			15.4	1.0233	1.01481	1.00879	0.999067	1.04073	1.05314	1.03661	1.06737	1.01044	1.03476			15.4	1.0329	1.01616	1.04878	1.02425	1.02638
	15.5	0.952674	0.947566	0.981627	0.969688	0.982136	0.964942	0.972039	0.958594	0.957625	0.947636	0.94936	0.945748	0.940611			15.5	1.00095	0.985882	1.00967	0.995603	1.00108	0.998974	0.991	0.998324	0.997533	1.01264	1.01066			15.5	1.01591	1.01029	1.01221	1.00256	1.04387	1.05893	1.03561	1.06833	1.01281	1.03568			15.5	1.02988	1.0175	1.05323	1.02539	1.02904
	15.6	0.951533	0.947566	0.977359	0.970788	0.983444	0.959306	0.974621	0.960879	0.957625	0.943875	0.945174	0.952308	0.942606			15.6	1.00326	0.985882	1.01285	0.99664	0.997491	0.996693	0.991	0.999488	0.998859	1.01757	1.0174			15.6	1.01837	1.01029	1.01392	1.00606	1.04387	1.05893	1.02467	1.05398	1.00806	1.03105			15.6	1.0329	1.01616	1.04878	1.02083	1.02638
	15.7	0.953815	0.95204	0.978426	0.969688	0.97952	0.960433	0.969458	0.957452	0.96233	0.943875	0.944127	0.952308	0.944601			15.7	1.01021	0.98	1.00967	0.994566	0.999881	0.997833	0.996984	0.999488	1.00019	1.01757	1.01066			15.7	1.02207	1.01029	1.01563	1.00956	1.04073	1.05397	1.02865	1.0645	1.00449	1.03383			15.7	1.03189	1.02016	1.04433	1.02425	1.02771
	15.8	0.951533	0.955619	0.98376	0.969688	0.983444	0.958178	0.969458	0.958594	0.956448	0.947636	0.94622	0.947935	0.941608			15.8	1.01136	0.987059	1.01179	0.998714	1.00346	0.997833	0.99459	0.998324	1.00284	1.02151	1.01291			15.8	1.0233	1.01707	1.01563	1.00723	1.03968	1.0614	1.02169	1.05685	1.00449	1.03661			15.8	1.02787	1.02283	1.05879	1.02197	1.0317
	15.9	0.952674	0.947566	0.98056	0.971889	0.983444	0.962687	0.97333	0.959737	0.958801	0.945755	0.948314	0.950121	0.941608			15.9	1.01599	0.992941	1.02237	1.00597	1.00824	0.998974	0.996984	1.00414	1.00019	1.02053	1.01403			15.9	1.0196	1.01481	1.00964	1.00723	1.04387	1.06058	1.02666	1.05876	1.00449	1.03846			15.9	1.03189	1.02283	1.05768	1.01969	1.03037
	16	0.948111	0.949356	0.979493	0.971889	0.980828	0.960433	0.974621	0.963164	0.959977	0.942935	0.94308	0.946841	0.942606			16	1.01368	0.992941	1.0192	1.00908	1.01541	0.996693	0.99459	1.00182	1.00284	1.02743	1.02078			16	1.0233	1.0182	1.00879	1.0014	1.04178	1.0614	1.02567	1.05876	1.00806	1.03383			16	1.03491	1.01616	1.05323	1.02311	1.03834
	16.1	0.950392	0.946671	0.977359	0.97299	0.978213	0.96156	0.970748	0.958594	0.956448	0.945755	0.945174	0.950121	0.945598			16.1	1.02409	0.995294	1.0192	1.00494	1.01183	1.00125	1.00417	1.00182	1.00417	1.02349	1.01965			16.1	1.02576	1.01933	1.00451	1.0049	1.04283	1.0581	1.02467	1.05876	1.01044	1.03754			16.1	1.02888	1.01483	1.05212	1.02767	1.02638
	16.2	0.950392	0.951145	0.977359	0.97299	0.980828	0.963815	0.97333	0.960879	0.956448	0.944815	0.945174	0.947935	0.941608			16.2	1.03104	0.997647	1.02343	1.01116	1.02138	1.00239	1.00417	1.00647	1.00682	1.02546	1.02078			16.2	1.02084	1.01594	1.00793	1.00606	1.04387	1.0548	1.02268	1.05876	1.00806	1.03105			16.2	1.02988	1.02016	1.05657	1.01969	1.03302
	16.3	0.950392	0.950251	0.98056	0.969688	0.984751	0.96156	0.972039	0.962022	0.956448	0.946696	0.950407	0.951215	0.944601			16.3	1.02062	0.998824	1.02449	1.0122	1.02377	1.00125	1.00536	1.00414	1.00417	1.0294	1.02078			16.3	1.0233	1.01933	1.00451	1.0049	1.04387	1.06058	1.0197	1.05494	1.00568	1.0329			16.3	1.02888	1.0215	1.04878	1.02881	1.02239
	16.4	0.951533	0.952935	0.982693	0.967486	0.978213	0.962687	0.969458	0.959737	0.963507	0.946696	0.94936	0.946841	0.944601			16.4	1.02756	1.00235	1.02449	1.01427	1.02258	1.00582	1.01135	1.00763	1.00814	1.03532	1.02302			16.4	1.01345	1.01142	1.00366	1.00373	1.04387	1.0614	1.01671	1.04633	1.00449	1.03013			16.4	1.02486	1.0175	1.05768	1.02083	1.03302
	16.5	0.951533	0.949356	0.982693	0.97299	0.984751	0.963815	0.970748	0.958594	0.955272	0.946696	0.947267	0.946841	0.941608			16.5	1.03219	1.00471	1.02661	1.01634	1.02377	1.00468	1.00776	1.00763	1.00814	1.03532	1.02864			16.5	1.0196	1.01029	0.999384	1.00373	1.04387	1.06966	1.02169	1.05207	1.0033	1.0292			16.5	1.03089	1.01883	1.051	1.01741	1.02638
	16.6	0.954956	0.948461	0.975225	0.97299	0.976905	0.960433	0.968167	0.960879	0.955272	0.942935	0.94622	0.940281	0.938616			16.6	1.02756	1.00588	1.02767	1.01946	1.02616	1.00924	1.01494	1.01112	1.00947	1.03039	1.01965			16.6	1.01714	1.00804	0.994255	0.996736	1.04283	1.06719	1.02268	1.05015	1.00449	1.03198			16.6	1.02988	1.02416	1.051	1.01969	1.02638
	16.7	0.949252	0.944882	0.988028	0.969688	0.986059	0.963815	0.97333	0.959737	0.961154	0.944815	0.947267	0.941375	0.938616			16.7	1.02988	1.00588	1.02555	1.01427	1.02258	1.01152	1.01613	1.01345	1.0108	1.03729	1.02752			16.7	1.01837	1.00578	1.00024	1.0049	1.03968	1.06306	1.01572	1.04537	1.00449	1.03013			16.7	1.02888	1.02416	1.05434	1.02653	1.02771
	16.8	0.954956	0.955619	0.981627	0.968587	0.982136	0.962687	0.968167	0.962022	0.957625	0.947636	0.94936	0.943561	0.940611			16.8	1.03104	1.00941	1.02661	1.01842	1.02736	1.01494	1.01853	1.00763	1.00151	1.04025	1.02752			16.8	1.01714	1.00239	0.99853	1.0049	1.04492	1.0614	1.01671	1.04537	0.999738	1.02271			16.8	1.0329	1.02683	1.05657	1.01626	1.03435
	16.9	0.951533	0.952935	0.977359	0.971889	0.97952	0.963815	0.972039	0.964307	0.951742	0.947636	0.947267	0.942468	0.939613			16.9	1.03219	1.01176	1.02449	1.01842	1.02377	1.01722	1.02331	1.0088	1.00682	1.03631	1.02415			16.9	1.01837	1.00465	0.99511	1.00023	1.04178	1.05562	1.01572	1.0425	1.00212	1.02827			16.9	1.03691	1.02683	1.04878	1.02083	1.02372
	17	0.951533	0.949356	0.975225	0.970788	0.982136	0.960433	0.970748	0.959737	0.958801	0.947636	0.948314	0.945748	0.939613			17	1.03219	1.01412	1.02343	1.0236	1.02975	1.02178	1.0305	1.01112	1.00417	1.03926	1.03876			17	1.02207	1.00804	0.9934	0.993239	1.04178	1.05893	1.01273	1.0339	0.996172	1.02271			17	1.03691	1.02683	1.05323	1.01969	1.03302
	17.1	0.949252	0.948461	0.98056	0.97299	0.982136	0.959306	0.965585	0.960879	0.957625	0.943875	0.94936	0.941375	0.939613			17.1	1.03451	1.01412	1.02767	1.0236	1.03094	1.02178	1.02691	1.01461	1.00682	1.03631	1.02977			17.1	1.01837	1.01029	0.989126	0.992073	1.04178	1.05727	1.01572	1.03581	1.00212	1.01808			17.1	1.03591	1.02816	1.05879	1.02083	1.0317
	17.2	0.950392	0.950251	0.977359	0.970788	0.980828	0.958178	0.965585	0.964307	0.956448	0.944815	0.947267	0.944655	0.942606			17.2	1.03335	1.01882	1.03084	1.02257	1.02377	1.0252	1.02212	1.0181	1.00682	1.03631	1.03539			17.2	1.02084	1.01255	0.989981	0.99557	1.03863	1.05645	1.00875	1.03103	0.999738	1.02086			17.2	1.0339	1.02416	1.06101	1.01969	1.0317
	17.3	0.94697	0.947566	0.977359	0.970788	0.980828	0.962687	0.975912	0.959737	0.957625	0.943875	0.947267	0.942468	0.940611			17.3	1.03451	1.01765	1.02872	1.02049	1.02616	1.02748	1.02212	1.01927	1.00682	1.03631	1.03427			17.3	1.01837	1.00804	0.992545	0.997902	1.03758	1.06388	1.0008	1.02051	0.996172	1.02086			17.3	1.02687	1.02416	1.05434	1.02083	1.0317
	17.4	0.953815	0.95204	0.975225	0.971889	0.983444	0.958178	0.969458	0.958594	0.952919	0.945755	0.94936	0.937001	0.936621			17.4	1.03682	1.01647	1.02661	1.0236	1.02736	1.02976	1.02571	1.0216	1.01212	1.03532	1.03089			17.4	1.02084	1.00691	0.989981	0.996736	1.04073	1.06223	1.01771	1.03581	0.996172	1.0153			17.4	1.03189	1.02416	1.05323	1.01855	1.0184
	17.5	0.949252	0.949356	0.979493	0.975191	0.986059	0.958178	0.969458	0.956309	0.954095	0.947636	0.94936	0.943561	0.940611			17.5	1.03335	1.01647	1.02872	1.02049	1.02736	1.02862	1.02092	1.0216	1.00814	1.03532	1.03651			17.5	1.01591	1.01029	0.990835	0.993239	1.03863	1.05397	1.00975	1.0339	0.994983	1.01994			17.5	1.0339	1.02016	1.05657	1.01969	1.02505
	17.6	0.950392	0.943987	0.976292	0.968587	0.984751	0.962687	0.974621	0.959737	0.948213	0.945755	0.94622	0.942468	0.939613			17.6	1.03335	1.01647	1.02872	1.02049	1.02616	1.03889	1.02571	1.02276	1.00814	1.03532	1.03764			17.6	1.01714	1.01029	0.981431	0.983912	1.03548	1.0614	1.00776	1.02529	0.994983	1.01716			17.6	1.0339	1.0175	1.05879	1.02767	1.02771
	17.7	0.950392	0.951145	0.978426	0.976292	0.986059	0.959306	0.969458	0.957452	0.949389	0.944815	0.94622	0.941375	0.938616			17.7	1.03798	1.01294	1.02661	1.0236	1.02975	1.03661	1.03169	1.02276	1.00682	1.03335	1.03989			17.7	1.02084	1.00804	0.986561	0.986244	1.03548	1.06719	1.01472	1.02816	0.996172	1.01252			17.7	1.03189	1.02283	1.05657	1.02311	1.02638
	17.8	0.953815	0.949356	0.974158	0.968587	0.980828	0.957051	0.970748	0.959737	0.952919	0.947636	0.948314	0.940281	0.933629			17.8	1.03451	1.01765	1.02661	1.02153	1.03094	1.0309	1.0281	1.0216	1.0108	1.03433	1.03427			17.8	1.01714	1.00352	0.984851	0.98741	1.03758	1.05727	1.00875	1.02624	0.993795	1.01623			17.8	1.03089	1.0255	1.05545	1.02425	1.02505
	17.9	0.950392	0.948461	0.981627	0.971889	0.983444	0.958178	0.970748	0.959737	0.952919	0.946696	0.944127	0.945748	0.937618			17.9	1.03798	1.02	1.02872	1.01842	1.02616	1.03319	1.02451	1.02741	1.00947	1.04025	1.03427			17.9	1.02084	1.00352	0.987416	0.986244	1.03338	1.05232	1.00378	1.02816	0.994983	1.01438			17.9	1.02888	1.0215	1.05657	1.02197	1.02372
	18	0.949252	0.945777	0.975225	0.969688	0.976905	0.959306	0.966876	0.960879	0.955272	0.946696	0.948314	0.940281	0.936621			18	1.03104	1.01412	1.02767	1.0236	1.03094	1.03889	1.02571	1.02625	1.00682	1.03236	1.03202			18	1.01837	1.00804	0.981431	0.983912	1.03338	1.0581	1.00676	1.0272	0.991417	1.0153			18	1.02988	1.02416	1.0599	1.02425	1.02239
	18.1	0.952674	0.948461	0.979493	0.970788	0.983444	0.957051	0.964294	0.956309	0.957625	0.945755	0.94622	0.938095	0.935624			18.1	1.04029	1.01882	1.02978	1.02153	1.02855	1.04003	1.02451	1.02741	1.00947	1.03236	1.03314			18.1	1.02207	1.00691	0.979722	0.978083	1.03968	1.0548	1.00179	1.02146	0.996172	1.0116			18.1	1.03089	1.0215	1.06213	1.01741	1.02638
	18.2	0.952674	0.948461	0.977359	0.971889	0.986059	0.957051	0.969458	0.958594	0.948213	0.945755	0.942034	0.941375	0.937618			18.2	1.03335	1.02	1.02978	1.02049	1.02497	1.03661	1.02331	1.02858	1.00549	1.03138	1.04214			18.2	1.0196	1.00126	0.977157	0.978083	1.03653	1.05067	1.00478	1.02051	0.994983	1.0116			18.2	1.0329	1.0255	1.05879	1.01969	1.01973
	18.3	0.94697	0.947566	0.978426	0.97299	0.984751	0.957051	0.969458	0.959737	0.952919	0.945755	0.944127	0.937001	0.936621			18.3	1.04029	1.01647	1.02449	1.01946	1.02616	1.03889	1.02092	1.03207	1.00947	1.03236	1.03539			18.3	1.01098	0.99562	0.975447	0.971089	1.03338	1.05645	0.999801	1.01859	0.993795	1.01067			18.3	1.0329	1.0215	1.05657	1.01741	1.02106
	18.4	0.94697	0.943092	0.981627	0.976292	0.980828	0.958178	0.969458	0.958594	0.956448	0.941055	0.94308	0.940281	0.934626			18.4	1.03451	1.02235	1.03402	1.01946	1.02377	1.04117	1.02451	1.03556	1.0108	1.03631	1.03651			18.4	1.0196	1.00691	0.975447	0.974586	1.03443	1.05645	1.00179	1.02338	0.991417	1.01067			18.4	1.03591	1.0255	1.06101	1.02425	1.02505
	18.5	0.948111	0.947566	0.975225	0.97299	0.976905	0.958178	0.966876	0.955167	0.950566	0.949516	0.94622	0.939188	0.935624			18.5	1.03219	1.01529	1.02978	1.0236	1.03213	1.03889	1.02331	1.02974	1.00682	1.03433	1.03876			18.5	1.01468	1.00352	0.976302	0.975752	1.03338	1.05975	0.998806	1.01764	0.990228	1.01067			18.5	1.0329	1.02683	1.05657	1.01855	1.02904
	18.6	0.950392	0.95204	0.981627	0.97299	0.988675	0.958178	0.965585	0.965449	0.948213	0.945755	0.94622	0.935908	0.933629			18.6	1.03566	1.01765	1.02767	1.02049	1.02855	1.04231	1.02331	1.03207	1.0108	1.03433	1.03539			18.6	1.0196	0.997878	0.972027	0.97342	1.02499	1.06306	1.00179	1.01477	0.987851	1.00511			18.6	1.03089	1.0175	1.05879	1.01741	1.02904
	18.7	0.949252	0.949356	0.975225	0.970788	0.980828	0.955924	0.968167	0.959737	0.956448	0.946696	0.947267	0.938095	0.934626			18.7	1.03451	1.01765	1.02978	1.02257	1.03213	1.03889	1.02691	1.03672	1.01345	1.03729	1.03876			18.7	1.0233	1.00239	0.974592	0.978083	1.02814	1.05727	0.999801	1.01764	0.987851	1.00882			18.7	1.02486	1.01883	1.05323	1.02083	1.02771
	18.8	0.948111	0.949356	0.98056	0.971889	0.982136	0.959306	0.965585	0.959737	0.951742	0.943875	0.944127	0.937001	0.934626			18.8	1.04145	1.01882	1.02872	1.02049	1.02497	1.04117	1.02571	1.03789	1.01478	1.03631	1.03651			18.8	1.01591	0.993363	0.971173	0.979249	1.02499	1.05397	1.00378	1.02051	0.991417	1.00697			18.8	1.02888	1.0215	1.05545	1.02083	1.02505
	18.9	0.953815	0.946671	0.979493	0.97299	0.986059	0.96156	0.966876	0.956309	0.949389	0.940115	0.93994	0.937001	0.932631			18.9	1.04724	1.02118	1.02872	1.0236	1.02497	1.04003	1.02691	1.03556	1.0108	1.03236	1.03427			18.9	1.01714	1.00465	0.972027	0.975752	1.02184	1.04984	0.993832	1.01477	0.992606	1.00326			18.9	1.02888	1.02416	1.05657	1.02425	1.02904
	19	0.948111	0.950251	0.977359	0.971889	0.976905	0.954797	0.964294	0.958594	0.949389	0.942935	0.944127	0.938095	0.934626			19	1.04029	1.02235	1.02661	1.0236	1.02736	1.03661	1.01972	1.03323	1.01212	1.03433	1.03764			19	1.01837	1.00239	0.972027	0.978083	1.02289	1.04571	1.0008	1.01381	0.987851	1.00326			19	1.02586	1.01616	1.05768	1.02197	1.03302
	19.1	0.94697	0.949356	0.978426	0.97299	0.980828	0.958178	0.964294	0.959737	0.950566	0.941995	0.944127	0.941375	0.929639			19.1	1.04145	1.02235	1.03084	1.02153	1.02377	1.03661	1.02092	1.03556	1.0161	1.02842	1.03427			19.1	1.01714	1.00014	0.964333	0.966426	1.02499	1.04736	0.995822	1.01381	0.990228	1.00326			19.1	1.03491	1.02283	1.051	1.02995	1.02904
	19.2	0.949252	0.945777	0.979493	0.967486	0.982136	0.955924	0.968167	0.962022	0.950566	0.941995	0.945174	0.935908	0.930636			19.2	1.04145	1.02353	1.0319	1.01946	1.02497	1.04117	1.0281	1.03905	1.01876	1.03039	1.03539			19.2	1.01468	1.00126	0.970318	0.971089	1.01974	1.03745	0.996817	1.01285	0.98904	1.00141			19.2	1.0329	1.0255	1.05657	1.02539	1.0317
	19.3	0.949252	0.947566	0.98056	0.966386	0.983444	0.955924	0.966876	0.954024	0.950566	0.944815	0.945174	0.933721	0.929639			19.3	1.04492	1.02235	1.02872	1.01634	1.02497	1.03889	1.02212	1.03439	1.01478	1.03236	1.03539			19.3	1.01222	0.994491	0.970318	0.97342	1.01974	1.04158	0.989853	1.00999	0.987851	0.998629			19.3	1.03089	1.02683	1.05434	1.02539	1.02904
	19.4	0.94697	0.951145	0.975225	0.969688	0.980828	0.958178	0.968167	0.956309	0.951742	0.941995	0.93994	0.938095	0.932631			19.4	1.04145	1.01882	1.02661	1.01738	1.02616	1.03889	1.02451	1.03672	1.01478	1.02546	1.03427			19.4	1.01591	0.997878	0.965188	0.975752	1.02079	1.04158	0.998806	1.0119	0.986662	0.997703			19.4	1.02486	1.02283	1.05657	1.02767	1.02505
	19.5	0.940124	0.945777	0.973091	0.969688	0.975597	0.955924	0.964294	0.962022	0.951742	0.940115	0.938893	0.934814	0.932631			19.5	1.03798	1.02235	1.02767	1.0122	1.02377	1.03433	1.01972	1.03789	1.0161	1.02842	1.03539			19.5	1.01591	0.997878	0.966898	0.972255	1.01974	1.0358	0.995822	1.0119	0.98904	0.993071			19.5	1.02687	1.0215	1.05657	1.02653	1.02771
	19.6	0.948111	0.939513	0.98056	0.966386	0.97952	0.955924	0.968167	0.956309	0.950566	0.941055	0.942034	0.935908	0.936621			19.6	1.04261	1.02235	1.02661	1.01531	1.02497	1.03661	1.02691	1.03905	1.01478	1.0294	1.03876			19.6	1.0196	1.00014	0.967753	0.968757	1.0187	1.04241	0.989853	1.00903	0.990228	0.993997			19.6	1.02385	1.01616	1.03877	1.02995	1.02771
	19.7	0.948111	0.944882	0.979493	0.966386	0.984751	0.955924	0.963003	0.952882	0.944684	0.941055	0.93994	0.931534	0.925649			19.7	1.03798	1.02235	1.02661	1.01427	1.01899	1.03661	1.02571	1.03789	1.01478	1.02447	1.03427			19.7	1.01222	0.993363	0.966898	0.966426	1.01555	1.03415	0.997811	1.01572	0.990228	0.993997			19.7	1.02285	1.0175	1.03988	1.02995	1.02904
	19.8	0.942406	0.946671	0.970957	0.965285	0.97952	0.954797	0.961712	0.959737	0.948213	0.941995	0.942034	0.933721	0.937618			19.8	1.03451	1.01882	1.02132	1.01427	1.02138	1.03433	1.02331	1.03439	1.01345	1.02447	1.03764			19.8	1.01591	0.99562	0.964333	0.967592	1.01974	1.04241	0.988858	0.996595	0.985473	0.99585			19.8	1.02787	1.0215	1.04211	1.02197	1.02505
	19.9	0.948111	0.943092	0.975225	0.965285	0.980828	0.958178	0.966876	0.954024	0.949389	0.941995	0.94308	0.933721	0.930636			19.9	1.03798	1.02118	1.02555	1.01738	1.02019	1.04003	1.02212	1.03905	1.0161	1.02151	1.03651			19.9	1.00729	0.994491	0.966043	0.971089	1.0166	1.03415	0.989853	1.0052	0.983096	0.99585			19.9	1.02988	1.01616	1.04433	1.03109	1.02239
	20	0.94697	0.943092	0.977359	0.966386	0.978213	0.954797	0.964294	0.949454	0.948213	0.940115	0.937847	0.937001	0.931634			20	1.03798	1.02235	1.02555	1.01427	1.0166	1.03889	1.02212	1.03672	1.0161	1.02546	1.03876			20	1.01345	0.996749	0.966043	0.979249	1.01765	1.02754	0.987863	1.00903	0.984285	0.992144			20	1.02787	1.02016	1.04656	1.02881	1.02505
	20.1	0.948111	0.946671	0.974158	0.968587	0.982136	0.955924	0.964294	0.949454	0.944684	0.934474	0.9368	0.933721	0.925649			20.1	1.03451	1.02471	1.02872	1.01116	1.02138	1.04117	1.02571	1.04021	1.0161	1.02842	1.04214			20.1	1.01345	0.996749	0.963478	0.972255	1.0145	1.03084	0.989853	1.00712	0.987851	0.988439			20.1	1.02988	1.02283	1.04322	1.03223	1.02106
	20.2	0.941265	0.946671	0.975225	0.971889	0.97952	0.955924	0.965585	0.952882	0.943507	0.933534	0.944127	0.937001	0.932631			20.2	1.03914	1.01529	1.02343	1.01427	1.02019	1.03775	1.02331	1.03672	1.01876	1.02546	1.04101			20.2	1.01837	0.997878	0.966043	0.971089	1.01765	1.0391	0.985873	1.00138	0.983096	0.993071			20.2	1.02687	1.02016	1.04989	1.03451	1.02771
	20.3	0.942406	0.943092	0.978426	0.960882	0.97952	0.955924	0.968167	0.954024	0.947037	0.938234	0.93994	0.932628	0.928641			20.3	1.03914	1.01647	1.02767	1.00805	1.0178	1.04117	1.02571	1.03905	1.02141	1.02546	1.04101			20.3	1.01468	0.994491	0.957494	0.960597	1.01555	1.03167	0.979904	0.997552	0.983096	0.986586			20.3	1.0339	1.0215	1.05212	1.0368	1.03037
	20.4	0.948111	0.941303	0.978426	0.965285	0.980828	0.957051	0.966876	0.951739	0.947037	0.937294	0.942034	0.935908	0.936621			20.4	1.03682	1.02	1.02978	1.01531	1.02138	1.03319	1.02451	1.03905	1.02274	1.02645	1.04101			20.4	1.00975	0.993363	0.960059	0.966426	1.0145	1.03745	0.983884	1.00042	0.983096	0.992144			20.4	1.02888	1.0215	1.05212	1.03337	1.0317
	20.5	0.945829	0.945777	0.975225	0.966386	0.978213	0.957051	0.969458	0.951739	0.947037	0.933534	0.938893	0.934814	0.929639			20.5	1.04029	1.02118	1.02449	1.01323	1.02138	1.03547	1.02212	1.04138	1.02539	1.02743	1.04214			20.5	1.01098	0.994491	0.964333	0.968757	1.0145	1.02836	0.987863	1.00233	0.985473	0.990292			20.5	1.03089	1.0175	1.04767	1.03565	1.02505
	20.6	0.948111	0.945777	0.970957	0.963084	0.976905	0.955924	0.968167	0.952882	0.948213	0.934474	0.940987	0.932628	0.929639			20.6	1.04029	1.02	1.02978	1.02049	1.02497	1.03775	1.02691	1.03672	1.02274	1.02546	1.04214			20.6	1.00975	0.992234	0.966043	0.968757	1.00716	1.03332	0.97891	0.995639	0.981907	0.993071			20.6	1.02888	1.02283	1.051	1.03451	1.03037
	20.7	0.940124	0.944882	0.976292	0.964184	0.982136	0.957051	0.969458	0.956309	0.948213	0.935414	0.94308	0.935908	0.933629			20.7	1.04145	1.01882	1.02978	1.01842	1.02138	1.03661	1.02691	1.03905	1.02141	1.02349	1.04326			20.7	1.01098	0.99562	0.964333	0.967592	1.00611	1.03662	0.985873	1.00233	0.984285	0.988439			20.7	1.02586	1.01616	1.04433	1.02767	1.02505
	20.8	0.942406	0.945777	0.970957	0.967486	0.976905	0.955924	0.966876	0.947169	0.949389	0.940115	0.945174	0.934814	0.929639			20.8	1.03335	1.01765	1.03084	1.02257	1.02377	1.03433	1.02092	1.04021	1.02672	1.01954	1.04326			20.8	1.00606	0.992234	0.963478	0.966426	1.01555	1.02671	0.983884	1.00042	0.980718	0.98566			20.8	1.02586	1.02016	1.04544	1.0368	1.02505
	20.9	0.943547	0.934145	0.970957	0.965285	0.975597	0.954797	0.964294	0.955167	0.938801	0.941995	0.945174	0.929348	0.928641			20.9	1.03914	1.01529	1.02767	1.01116	1.0178	1.03661	1.02331	1.03905	1.02274	1.02743	1.04101			20.9	1.0036	0.987718	0.960914	0.966426	1.01555	1.0201	0.980899	0.995639	0.985473	0.986586			20.9	1.02988	1.02016	1.04767	1.03109	1.02904
	21	0.941265	0.943987	0.974158	0.964184	0.978213	0.954797	0.966876	0.958594	0.944684	0.940115	0.940987	0.934814	0.932631			21	1.03451	1.02235	1.03296	1.0122	1.01541	1.03319	1.02331	1.03789	1.02406	1.02447	1.03876			21	1.01345	0.996749	0.961769	0.964094	1.01765	1.02836	0.97692	0.991813	0.981907	0.988439			21	1.02888	1.02016	1.04433	1.02767	1.02904
	21.1	0.94697	0.941303	0.970957	0.964184	0.982136	0.953669	0.968167	0.955167	0.952919	0.940115	0.94308	0.929348	0.922656			21.1	1.03682	1.02471	1.03507	1.01012	1.02019	1.0309	1.02212	1.03439	1.02274	1.02645	1.04326			21.1	1.00483	0.98659	0.960059	0.96526	1.00611	1.02919	0.97891	0.997552	0.983096	0.98566			21.1	1.02687	1.02283	1.04211	1.02881	1.02505
	21.2	0.942406	0.946671	0.967756	0.961983	0.975597	0.953669	0.966876	0.951739	0.948213	0.937294	0.942034	0.934814	0.928641			21.2	1.03798	1.02471	1.03296	1.01012	1.02138	1.03319	1.02331	1.03905	1.02539	1.02842	1.04326			21.2	1.00852	0.991105	0.958349	0.961763	1.0145	1.03002	0.979904	0.995639	0.983096	0.987513			21.2	1.03089	1.02016	1.03766	1.02881	1.02904
	21.3	0.941265	0.947566	0.974158	0.966386	0.978213	0.951415	0.963003	0.952882	0.941154	0.938234	0.940987	0.931534	0.927644			21.3	1.03914	1.02118	1.02767	1.01427	1.0178	1.03775	1.02331	1.03672	1.02406	1.03138	1.04551			21.3	1.00606	0.98659	0.955784	0.960597	1.0145	1.02093	0.981894	0.997552	0.984285	0.981954			21.3	1.03089	1.0215	1.04099	1.02995	1.03037
	21.4	0.944688	0.947566	0.970957	0.959782	0.97952	0.950287	0.966876	0.956309	0.948213	0.939175	0.93994	0.931534	0.924651			21.4	1.03219	1.02353	1.03402	1.01427	1.02019	1.03319	1.02092	1.03905	1.02672	1.02842	1.04438			21.4	1.01098	0.988847	0.962624	0.964094	1.0187	1.01845	0.977915	0.997552	0.978341	0.98566			21.4	1.02385	1.02283	1.03432	1.03337	1.02505
	21.5	0.943547	0.945777	0.966689	0.963084	0.974289	0.953669	0.966876	0.948311	0.949389	0.935414	0.938893	0.938095	0.933629			21.5	1.03682	1.01647	1.02555	1.01946	1.02258	1.03775	1.02092	1.04021	1.02937	1.02546	1.04326			21.5	0.999901	0.977559	0.95322	0.952436	1.0103	1.02589	0.973936	0.993726	0.983096	0.987513			21.5	1.03189	1.0255	1.03766	1.02539	1.0317
	21.6	0.944688	0.945777	0.967756	0.966386	0.976905	0.953669	0.968167	0.951739	0.947037	0.935414	0.93994	0.940281	0.931634			21.6	1.03682	1.02	1.02978	1.01946	1.02138	1.03889	1.02451	1.04021	1.02937	1.02645	1.04101			21.6	1.00483	0.987718	0.958349	0.959431	1.0124	1.02754	0.973936	0.991813	0.981907	0.986586			21.6	1.02787	1.02416	1.04211	1.03223	1.03037
	21.7	0.942406	0.947566	0.965622	0.963084	0.976905	0.954797	0.968167	0.952882	0.94586	0.937294	0.940987	0.937001	0.928641			21.7	1.03566	1.02235	1.03402	1.02257	1.02855	1.03775	1.02331	1.03789	1.02672	1.02447	1.04214			21.7	1.00606	0.991105	0.958349	0.958265	1.0145	1.02093	0.975925	0.997552	0.986662	0.983807			21.7	1.02988	1.02683	1.03766	1.03337	1.02771
	21.8	0.944688	0.944882	0.967756	0.969688	0.978213	0.953669	0.965585	0.950596	0.944684	0.938234	0.94308	0.935908	0.929639			21.8	1.03335	1.02235	1.03084	1.02568	1.02616	1.03775	1.02571	1.03905	1.02672	1.02151	1.04326			21.8	1.0036	0.98659	0.956639	0.958265	1.0124	1.02093	0.980899	0.999464	0.983096	0.98566			21.8	1.03089	1.02416	1.03877	1.03337	1.03037
	21.9	0.94697	0.949356	0.968823	0.966386	0.971674	0.953669	0.966876	0.950596	0.947037	0.939175	0.94308	0.932628	0.923654			21.9	1.03682	1.01647	1.02767	1.02049	1.02616	1.02862	1.02092	1.03789	1.02937	1.02349	1.04551			21.9	1.00606	0.988847	0.959204	0.9571	1.0103	1.02589	0.981894	0.995639	0.978341	0.984733			21.9	1.02988	1.02683	1.04099	1.03109	1.03435
	22	0.937842	0.944882	0.973091	0.965285	0.978213	0.954797	0.968167	0.951739	0.94586	0.941055	0.940987	0.934814	0.926646			22	1.03335	1.02235	1.0319	1.01842	1.02855	1.03433	1.02212	1.04021	1.02804	1.01856	1.04214			22	1.00236	0.985461	0.958349	0.958265	1.01135	1.02506	0.97692	0.994682	0.981907	0.98566			22	1.03189	1.02283	1.04211	1.03451	1.03302
	22.1	0.938983	0.939513	0.970957	0.964184	0.974289	0.953669	0.968167	0.946026	0.944684	0.941055	0.94622	0.934814	0.929639			22.1	1.03451	1.01882	1.02555	1.01634	1.02855	1.03433	1.01972	1.04021	1.02539	1.02349	1.04776			22.1	1.00236	0.984332	0.960914	0.962928	1.01345	1.02176	0.97891	0.998508	0.984285	0.982881			22.1	1.03591	1.02683	1.04099	1.02995	1.0317
	22.2	0.944688	0.940408	0.966689	0.961983	0.97952	0.953669	0.968167	0.949454	0.939978	0.937294	0.942034	0.932628	0.926646			22.2	1.03104	1.02118	1.02872	1.01738	1.02616	1.03661	1.02691	1.03789	1.0307	1.0225	1.04326			22.2	0.999901	0.985461	0.956639	0.959431	1.00506	1.02423	0.97493	0.991813	0.985473	0.979175			22.2	1.03591	1.02416	1.03655	1.02767	1.03302
	22.3	0.940124	0.938618	0.96989	0.968587	0.974289	0.952542	0.969458	0.949454	0.943507	0.938234	0.942034	0.935908	0.932631			22.3	1.02988	1.01647	1.02132	1.00701	1.02377	1.03319	1.02451	1.03556	1.02672	1.02645	1.04888			22.3	1.00113	0.982074	0.959204	0.961763	1.0103	1.02919	0.97891	0.991813	0.974775	0.979175			22.3	1.03491	1.02816	1.04099	1.02881	1.03302
	22.4	0.938983	0.935039	0.96989	0.964184	0.974289	0.951415	0.95913	0.949454	0.944684	0.936354	0.938893	0.931534	0.927644			22.4	1.03335	1.02	1.0319	1.01116	1.02258	1.03547	1.02092	1.03672	1.02672	1.02053	1.04214			22.4	0.99867	0.985461	0.95322	0.9571	1.00925	1.01928	0.97891	0.994682	0.97953	0.981954			22.4	1.02787	1.0255	1.04656	1.02653	1.03834
	22.5	0.943547	0.934145	0.970957	0.967486	0.983444	0.953669	0.968167	0.952882	0.943507	0.939175	0.938893	0.932628	0.921659			22.5	1.03566	1.01765	1.02978	1.01012	1.02019	1.03661	1.02451	1.03905	1.02804	1.0294	1.04776			22.5	1.00113	0.987718	0.955784	0.959431	1.00191	1.01928	0.97891	0.994682	0.977152	0.983807			22.5	1.02888	1.02816	1.04767	1.02539	1.03568
	22.6	0.944688	0.93325	0.972024	0.959782	0.972981	0.953669	0.968167	0.947169	0.948213	0.939175	0.944127	0.933721	0.924651			22.6	1.03682	1.02235	1.03084	1.00908	1.0166	1.03547	1.02092	1.03789	1.02672	1.02842	1.04776			22.6	0.999901	0.987718	0.956639	0.962928	1.0082	1.02258	0.971946	0.987987	0.978341	0.977322			22.6	1.02988	1.02416	1.04433	1.02767	1.03037
	22.7	0.942406	0.929671	0.974158	0.965285	0.982136	0.94916	0.965585	0.952882	0.941154	0.932594	0.937847	0.930441	0.924651			22.7	1.03798	1.01765	1.02661	1.0122	1.0178	1.03204	1.01972	1.03905	1.02937	1.02151	1.04551			22.7	1.00113	0.98659	0.956639	0.961763	1.00925	1.01515	0.97493	0.992769	0.984285	0.979175			22.7	1.03089	1.02683	1.04656	1.03223	1.0317
	22.8	0.942406	0.930566	0.966689	0.965285	0.97952	0.946906	0.964294	0.952882	0.94586	0.932594	0.938893	0.933721	0.926646			22.8	1.03566	1.02118	1.03507	1.01012	1.01422	1.03433	1.02092	1.04021	1.02804	1.02349	1.04663			22.8	0.99867	0.984332	0.952365	0.960597	1.00611	1.02589	0.97891	0.995639	0.983096	0.976396			22.8	1.0329	1.02283	1.04878	1.02767	1.03037
	22.9	0.941265	0.93325	0.970957	0.964184	0.978213	0.953669	0.966876	0.949454	0.948213	0.935414	0.94308	0.932628	0.927644			22.9	1.03914	1.02	1.0319	1.0122	1.0166	1.03204	1.01613	1.03905	1.02672	1.02447	1.05			22.9	1.00113	0.989976	0.955784	0.961763	1.00191	1.02093	0.97692	0.988944	0.983096	0.980102			22.9	1.03189	1.02283	1.04433	1.02311	1.03037
	23	0.938983	0.93146	0.972024	0.967486	0.983444	0.955924	0.968167	0.951739	0.944684	0.941055	0.942034	0.933721	0.929639			23	1.03682	1.01647	1.0319	1.01323	1.01541	1.03204	1.01733	1.03789	1.03202	1.02053	1.04214			23	0.996207	0.982074	0.959204	0.960597	1.00086	1.02176	0.97891	0.9899	0.97953	0.982881			23	1.0329	1.02016	1.04322	1.02653	1.02771
	23.1	0.940124	0.928776	0.964555	0.971889	0.976905	0.94916	0.961712	0.954024	0.943507	0.933534	0.93994	0.929348	0.925649			23.1	1.03335	1.02	1.03507	1.01323	1.01541	1.03547	1.02331	1.03556	1.02406	1.02053	1.04101			23.1	1.0036	0.994491	0.957494	0.958265	0.997713	1.01597	0.97891	0.992769	0.983096	0.977322			23.1	1.0339	1.0215	1.04767	1.02995	1.03701
	23.2	0.940124	0.936829	0.974158	0.963084	0.978213	0.94916	0.963003	0.951739	0.948213	0.936354	0.942034	0.929348	0.924651			23.2	1.03798	1.01412	1.02978	1.01842	1.02019	1.03319	1.01853	1.04138	1.02804	1.02447	1.04438			23.2	1.00113	0.988847	0.95322	0.958265	0.997713	1.01102	0.977915	0.9899	0.981907	0.980102			23.2	1.0339	1.02416	1.04322	1.02653	1.02638
	23.3	0.937842	0.935039	0.976292	0.965285	0.980828	0.94916	0.964294	0.950596	0.947037	0.937294	0.940987	0.933721	0.925649			23.3	1.03682	1.01647	1.02978	1.0122	1.01422	1.03319	1.02092	1.03789	1.02406	1.02645	1.04438			23.3	0.993744	0.983203	0.95322	0.9571	0.998762	1.0135	0.979904	0.994682	0.97953	0.974543			23.3	1.03591	1.02816	1.03766	1.02539	1.02771
	23.4	0.936701	0.930566	0.967756	0.970788	0.975597	0.945778	0.965585	0.947169	0.949389	0.936354	0.942034	0.933721	0.925649			23.4	1.03451	1.01176	1.02555	1.00908	1.00824	1.03319	1.01853	1.03207	1.02008	1.02349	1.04438			23.4	0.992513	0.984332	0.952365	0.954768	1.00191	1.01597	0.979904	0.993726	0.981907	0.977322			23.4	1.0329	1.02416	1.03988	1.02995	1.03037
	23.5	0.938983	0.926986	0.972024	0.967486	0.976905	0.951415	0.964294	0.947169	0.944684	0.928833	0.9368	0.929348	0.920662			23.5	1.03104	1.01765	1.0319	1.01738	1.0166	1.0309	1.02092	1.03556	1.02406	1.02546	1.04551			23.5	0.994976	0.989976	0.954929	0.958265	1.00716	1.01515	0.977915	0.991813	0.978341	0.979175			23.5	1.03591	1.02416	1.03766	1.03109	1.03967
	23.6	0.937842	0.926092	0.973091	0.967486	0.982136	0.951415	0.965585	0.949454	0.948213	0.932594	0.938893	0.937001	0.929639			23.6	1.03451	1.01765	1.03084	1.0122	1.01302	1.03547	1.02451	1.03789	1.02937	1.02447	1.04663			23.6	0.991282	0.985461	0.955784	0.955934	1.00296	1.02093	0.975925	0.992769	0.980718	0.977322			23.6	1.03491	1.01883	1.04433	1.03451	1.03435
	23.7	0.942406	0.924302	0.968823	0.968587	0.980828	0.94916	0.966876	0.951739	0.94586	0.931654	0.940987	0.931534	0.927644			23.7	1.03451	1.02	1.02872	1.01323	1.01302	1.03319	1.01972	1.03905	1.02539	1.02546	1.04326			23.7	0.997439	0.989976	0.9498	0.953602	1.00296	1.02341	0.97692	0.990857	0.978341	0.983807			23.7	1.03892	1.01616	1.04211	1.03109	1.02638
	23.8	0.937842	0.921618	0.973091	0.966386	0.980828	0.948033	0.963003	0.946026	0.94586	0.936354	0.93994	0.932628	0.925649			23.8	1.03219	1.01882	1.02978	1.01531	1.01422	1.03204	1.01972	1.03672	1.02539	1.02349	1.04551			23.8	0.996207	0.98659	0.95151	0.958265	1.00191	1.0168	0.968961	0.984162	0.97953	0.986586			23.8	1.0329	1.02283	1.03988	1.03565	1.02771
	23.9	0.93556	0.922513	0.972024	0.967486	0.97952	0.950287	0.965585	0.948311	0.939978	0.934474	0.944127	0.932628	0.927644			23.9	1.03219	1.01882	1.02661	1.02257	1.0166	1.03547	1.02691	1.03789	1.02539	1.01954	1.03989			23.9	0.997439	0.984332	0.95322	0.954768	1.00191	1.01845	0.977915	0.987031	0.980718	0.980102			23.9	1.03591	1.01883	1.04211	1.03337	1.03435
	24	0.93556	0.925197	0.968823	0.968587	0.975597	0.954797	0.966876	0.947169	0.94586	0.937294	0.940987	0.930441	0.925649			24	1.03219	1.01882	1.02872	1.01427	1.01302	1.0309	1.01972	1.03905	1.02539	1.02053	1.04214			24	0.992513	0.98659	0.952365	0.955934	0.999811	1.01763	0.973936	0.987987	0.977152	0.981028			24	1.02988	1.0255	1.03988	1.03337	1.03302
	24.1	0.93556	0.922513	0.968823	0.965285	0.97952	0.946906	0.963003	0.951739	0.943507	0.936354	0.938893	0.930441	0.924651			24.1	1.03219	1.01882	1.02767	1.01323	1.0178	1.03661	1.02571	1.04138	1.02672	1.02053	1.04438			24.1	0.992513	0.982074	0.95151	0.954768	0.998762	1.02258	0.967967	0.987031	0.977152	0.98566			24.1	1.03089	1.02283	1.03766	1.03223	1.02904
	24.2	0.938983	0.926986	0.970957	0.967486	0.97952	0.951415	0.965585	0.950596	0.94586	0.934474	0.93994	0.933721	0.924651			24.2	1.03104	1.02118	1.03084	1.01946	1.01541	1.03547	1.01972	1.03789	1.02672	1.01954	1.04214			24.2	0.992513	0.984332	0.954929	0.9571	1.00296	1.01763	0.969956	0.986074	0.975963	0.980102			24.2	1.03189	1.02283	1.03988	1.03223	1.0317
	24.3	0.937842	0.924302	0.968823	0.965285	0.980828	0.951415	0.965585	0.949454	0.942331	0.936354	0.940987	0.932628	0.929639			24.3	1.02756	1.01882	1.02555	1.02153	1.0178	1.03433	1.02212	1.03672	1.02274	1.01856	1.04214			24.3	0.991282	0.977559	0.95151	0.9571	0.994566	1.01928	0.972941	0.988944	0.977152	0.981954			24.3	1.03189	1.02283	1.03988	1.03337	1.03302
	24.4	0.937842	0.922513	0.968823	0.968587	0.97952	0.952542	0.965585	0.948311	0.948213	0.932594	0.937847	0.931534	0.924651			24.4	1.03451	1.02	1.02767	1.01842	1.0178	1.03319	1.02092	1.03789	1.02539	1.0225	1.04551			24.4	0.996207	0.983203	0.952365	0.953602	0.999811	1.0168	0.97493	0.986074	0.97953	0.981028			24.4	1.02988	1.0295	1.04767	1.02995	1.041
	24.5	0.93556	0.918933	0.967756	0.971889	0.982136	0.951415	0.965585	0.949454	0.948213	0.932594	0.937847	0.930441	0.924651			24.5	1.03451	1.01765	1.02872	1.01531	1.01541	1.03204	1.02331	1.03905	1.02539	1.01954	1.03539			24.5	0.993744	0.978688	0.952365	0.950105	0.996664	1.01597	0.972941	0.9899	0.977152	0.978249			24.5	1.03691	1.03483	1.04878	1.02995	1.03568
	24.6	0.937842	0.919828	0.972024	0.966386	0.980828	0.952542	0.966876	0.949454	0.94586	0.938234	0.937847	0.931534	0.923654			24.6	1.03219	1.01882	1.02661	1.01738	1.0166	1.03319	1.01972	1.04254	1.02672	1.02349	1.03651			24.6	0.992513	0.980946	0.95322	0.954768	1.00086	1.01928	0.970951	0.990857	0.977152	0.980102			24.6	1.04093	1.02683	1.03988	1.0368	1.0317
	24.7	0.93556	0.922513	0.974158	0.966386	0.983444	0.950287	0.966876	0.955167	0.94586	0.933534	0.940987	0.932628	0.925649			24.7	1.02641	1.01529	1.02978	1.01634	1.01899	1.03204	1.01853	1.03905	1.02539	1.0225	1.03989			24.7	0.988819	0.983203	0.95322	0.953602	0.995615	1.01597	0.971946	0.9899	0.980718	0.984733			24.7	1.04194	1.02683	1.04544	1.03223	1.03568
	24.8	0.93556	0.922513	0.972024	0.970788	0.978213	0.951415	0.966876	0.952882	0.951742	0.931654	0.9368	0.931534	0.927644			24.8	1.03682	1.01647	1.02978	1.01946	1.0166	1.02976	1.01613	1.03672	1.02406	1.02349	1.04214			24.8	0.988819	0.980946	0.95151	0.952436	1.00086	1.02176	0.967967	0.982249	0.973586	0.979175			24.8	1.04093	1.0295	1.04433	1.03223	1.03568
	24.9	0.93556	0.920723	0.970957	0.966386	0.974289	0.950287	0.965585	0.948311	0.949389	0.932594	0.93994	0.934814	0.927644			24.9	1.03682	1.01765	1.02449			1.03204	1.01853	1.04021	1.02804	1.02053	1.04101			24.9	0.992513	0.98659	0.95151	0.954768	0.998762	1.01184	0.972941	0.986074	0.971208	0.980102			24.9	1.04596	1.03217	1.04767	1.03451	1.03701
	25	0.937842	0.918933	0.974158	0.969688	0.97952	0.950287	0.961712	0.948311	0.944684	0.930714	0.9368	0.935908	0.924651			25	1.02872	1.01765	1.02872			1.02976	1.01494	1.03905	1.02804	1.01461	1.03314			25	0.988819	0.985461	0.948945	0.952436	0.997713	1.01928	0.975925	0.988944	0.975963	0.981954			25	1.04495	1.03083	1.04767	1.03223	1.03568
[truncated: 22 more columns]
