# Supplementary material for: FRET kinase sensor development reveals SnRK2/OST1 activation by ABA but not by MeJA and high CO2 during stomatal closure
Source: eLife. 2020 May 28;9:e56351. doi: 10.7554/eLife.56351 (PMC7289597; doi:10.7554/eLife.56351)
Supplement: Figure 7—figure supplement 1—source data 1. [file elife-56351-fig7-figsupp1-data1.xlsx]

## Sheet: Figure 7-figure supplement 1
Figure 7-figure supplement 1A		Normalized ratio																				Figure 7-figure supplement 1B		Normalized ratio
	Time (min)	average	Stomate_1	Stomate_2	Stomate_3	Stomate_4	Stomate_5	Stomate_6	Stomate_7	Stomate_8	Stomate_9	Stomate_10	Stomate_11	Stomate_12	Stomate_13	Stomate_14	Stomate_15	Stomate_16	Stomate_17	Stomate_18			Time (min)	average	Stomate_1	Stomate_2	Stomate_3	Stomate_4	Stomate_5	Stomate_6	Stomate_7	Stomate_8	Stomate_9	Stomate_10	Stomate_11	Stomate_12	Stomate_13	Stomate_14	Stomate_15	Stomate_16	Stomate_17	Stomate_18
	0.1	0.998768	1.00654	0.98971	1.00628	1.0029	1.00208	1.00453	1.00202	0.995088	0.994509	0.98835	0.98835	0.997917	0.995697	0.997193	1.00445	0.998691	1.0001	1.00341			0.1	0.997433	1.00045	0.997171	0.99565	0.994573	0.997887	1.00629	0.982964	1.0036	0.997003	1.0008	0.993337	1.00264	0.998976	0.993406	0.991719	1.00222	0.994268	1.00085
	0.2	0.999693	1.00544	0.987644	0.999167	1.00173	1.00453	1.00135	1.00091	0.992971	0.993646	0.998315	0.998315	1.00551	0.996586	0.999288	1.00334	0.999764	1.0001	1.00586			0.2	0.995048	0.995482	0.997171	0.994442	0.993195	0.994442	1.00517	0.997259	0.998305	0.984876	0.998753	0.993337	0.997522	0.995252	0.994466	0.988946	0.998855	0.987733	0.995656
	0.3	0.999845	1.00764	0.987644	0.995106	0.999391	0.998407	1.00241	0.9998	0.997205	1.00487	0.997409	0.997409	1.00876	0.998364	0.99824	1.00334	0.995473	1.0011	1.00464			0.3	0.997566	0.997964	0.99833	0.996858	0.994573	0.99559	1.00629	0.999781	1.00272	0.988341	1.00386	0.997388	1.00059	1.00177	0.996586	0.992643	0.996611	0.9896	0.996695
	0.4	1.00015	1.00983	0.991777	0.997137	1.00056	0.998407	1.00347	0.996475	0.992971	0.999689	0.998315	0.998315	1.00659	0.996586	0.99824	1.00111	0.999764	1.00512	1.00832			0.4	0.997827	0.999206	0.996011	0.998067	0.99595	0.999035	1.01074	0.989691	0.999188	0.997003	0.999775	0.993337	1.00367	1.00084	0.994466	0.997264	0.996611	0.993334	0.996695
	0.5	0.998431	1.00654	0.995909	0.995106	0.99471	0.997182	1.00241	0.998692	0.999322	1.00314	1.00284	1.00284	1.00226	0.998364	0.999288	1.00556	0.999764	0.984035	0.983784			0.5	0.996409	1.00045	0.997171	0.99565	0.993195	0.99559	1.00851	0.98885	1.00095	0.990073	0.999775	0.991312	1.00264	1.00177	0.997646	0.999113	0.994366	0.986799	0.991498
	0.6	0.997458	1.00544	0.994876	0.999167	0.997051	1.00086	1.0003	1.00202	0.994029	0.997099	0.995597	0.995597	1.00117	0.993919	0.99824	0.997775	1.00191	0.988051	0.991143			0.6	0.998109	1.00293	0.997171	0.998067	0.997328	0.996739	1.00406	0.993895	1.0036	0.995271	1.00591	1.00144	1.00469	0.998976	0.992345	0.99634	0.996611	0.984932	0.995656
	0.7	0.997258	1.00764	0.996942	0.993075	0.99354	0.998407	0.998179	1.00091	1.00144	0.998826	0.995597	0.995597	0.997917	0.991252	0.999288	0.998888	0.995473	0.994076	0.993597			0.7	0.997524	0.999206	0.99949	0.998067	0.994573	0.99559	1.00294	0.993054	1.00184	0.990073	1.00386	1.00245	1.00059	1.00177	0.993406	1.00004	0.994366	0.990533	0.993577
	0.8	0.999085	1.00874	0.997975	0.99409	0.99354	0.998407	1.0003	1.00423	0.999322	1.00228	0.997409	0.997409	1.00226	0.992141	0.99824	1.00445	1.00084	0.997088	0.994823			0.8	0.998446	1.00045	1.00065	0.998067	0.994573	1.00018	1.00183	0.990532	1.00095	0.993538	1.00386	1.00448	1.00367	1.00642	0.998707	0.994491	0.994366	0.9896	0.995656
	0.9	0.999268	1.00654	0.995909	0.99409	0.995881	1.00086	0.995004	1.00202	1.00779	1.00573	1.00013	1.00013	1.00117	0.988585	0.997193	0.998888	1.00298	0.999096	0.994823			0.9	0.998551	1.00169	1.00413	0.999275	0.99595	1.00018	1.00183	0.98885	1.00007	0.987475	1.00795	0.999413	1.00162	1.00829	0.998707	0.99634	0.997733	0.987733	0.996695
	1	0.998386	1.00215	0.994876	0.998152	0.99237	1.00086	0.998179	1.00423	1.0025	0.997963	0.999221	0.999221	0.997917	0.99303	0.99824	1	1.00191	0.994076	0.99605			1	0.998937	0.997964	1.00181	1.00048	0.99595	0.993294	0.998484	1.00146	1.00007	0.993538	1.00795	1.00144	1.00162	1.01015	0.996586	0.994491	0.997733	0.994268	0.993577
	1.1	0.999706	1.00654	0.999008	0.998152	0.998221	1.00208	0.999238	0.998692	1.00356	1.00055	1.00013	1.00013	0.999002	1.00014	0.99824	0.998888	0.996546	0.997088	0.998503			1.1	0.999042	0.996723	1.00181	1.00048	0.997328	1.00133	1.00071	0.994736	0.993892	0.998735	1.00386	1.00448	1.00162	1.00456	0.997646	0.999113	0.995488	0.991467	0.998774
	1.2	0.998619	1.00325	0.996942	0.992059	0.990029	0.998407	1.00347	1.00091	1.00462	0.997099	0.999221	0.999221	1.00443	1.00192	0.996145	1.00111	0.9944	0.997088	0.994823			1.2	0.999214	0.999206	1.00413	1.00048	0.998705	0.999035	0.998484	0.997259	1.00095	1.00133	1.00386	1.00144	0.99957	1.00456	0.996586	0.99634	0.998855	0.991467	0.993577
	1.3	1.00001	1.00105	0.995909	1.00018	0.995881	1.00086	1.00241	1.00202	1.00144	1.00228	1.00375	1.00375	0.996833	0.998364	0.999288	1.00334	1.00084	0.997088	0.994823			1.3	0.998164	0.994241	1.00065	1.00048	0.99595	0.997887	0.995141	0.998941	1.00448	0.993538	1.0008	1.00346	1.00162	1.00177	1.00189	0.993567	0.994366	0.991467	0.996695
	1.4	0.999557	1.00654	0.997975	0.997137	0.995881	1.00453	1.00135	1.00091	1.00462	0.999689	1.00013	1.00013	1.00009	0.999253	0.999288	1	0.997619	0.992067	0.994823			1.4	0.998555	0.996723	1.00065	1.00169	0.99595	0.994442	0.991798	0.996418	1.0036	0.994404	1.0008	1.0065	1.00367	1.0027	0.995526	0.995416	0.996611	0.995201	1.00189
	1.5	0.999642	0.999956	0.993843	0.996121	0.997051	1.00208	1.00135	1.00091	1.00356	1.00142	0.998315	0.998315	1.00117	1.00014	1.00557	1.00222	1.00084	0.997088	0.993597			1.5	0.997633	0.996723	1.00181	1.0029	0.998705	1.00018	0.992913	0.994736	1.00095	1.00047	1.0008	1.00043	0.996497	0.997114	0.997646	0.995416	0.996611	0.986799	0.996695
	1.6	1.00064	1.00325	0.997975	0.995106	1.00056	1.00331	1.0003	0.9998	1.00462	1.00055	1.00194	1.00194	1.00334	1.00725	1.00243	1.00222	1.00191	0.99508	0.989917			1.6	0.998517	0.999206	1.00413	0.999275	0.99595	1.00018	0.992913	0.994736	0.997423	1.00047	1.00386	0.995362	0.998546	1.00177	1.00401	0.991719	0.998855	0.996135	0.998774
	1.7	1.00004	1.00215	0.994876	0.995106	0.998221	1.00331	1.00241	1.00202	1.00462	1.00401	0.998315	0.998315	0.999002	0.997475	0.997193	1.00556	1.00298	0.999096	0.99605			1.7	0.999702	0.999206	1.00297	1.0029	1.00008	1.00478	0.994027	0.999781	0.995657	1.00133	1.00386	0.999413	0.994449	0.998045	1.00295	0.994491	0.999978	0.999869	1.00085
	1.8	0.999325	1.00544	1.00107	0.997137	1.00056	1.00331	0.999238	0.9998	1.00356	0.997963	0.997409	0.997409	1.00009	1.00014	0.996145	1	1.00191	0.993072	0.993597			1.8	1.00133	1.00293	1.00529	1.00169	0.998705	1.00707	0.995141	1.00062	1.00448	1.00047	1.00386	0.999413	1.00059	1.00549	1.00189	0.998188	1.0011	0.996135	1.00085
	1.9	0.999861	0.998858	0.98971	0.998152	1.00173	1.00453	0.996062	1.00091	1.00038	0.998826	0.999221	0.999221	1.00334	1.00192	1.00034	1.00556	1.00191	0.997088	0.99973			1.9	1.00122	1.00169	1.00181	0.999275	0.997328	1.00707	0.995141	1.0023	0.999188	0.998735	1.00489	1.00448	1.00264	1.00642	1.00613	0.997264	0.997733	0.998002	1.00189
	2	1.00235	1.00874	1.00004	0.999167	0.997051	1.00331	1.00241	1.00645	1.0025	1.00142	1.00194	1.00194	1.00226	1.00725	1.00348	1.00779	1.00298	0.99508	0.998503			2	1.00042	1.00169	1.00297	0.998067	0.997328	1.00363	0.995141	0.993054	1.00095	1.00307	1.00182	1.00448	0.99957	1.00456	1.00295	1.00189	0.997733	0.998936	0.999813
	2.1	1.00111	1.00215	0.993843	1.00018	0.997051	1.00208	1.00241	1.00202	0.999322	0.999689	1.00284	1.00284	0.997917	1.00459	1.00138	1.00334	0.998691	1.00613	1.00341			2.1	1.00025	0.999206	1.00065	0.999275	0.998705	1.00593	1.00183	1.00483	1.00095	0.997869	0.998753	0.995362	0.996497	1.00084	1.00507	1.00096	0.999978	0.998002	0.999813
	2.2	1.00235	1.00654	0.997975	1.00526	0.999391	1.00698	1.0003	1.00645	1.0025	0.999689	1.00103	1.00103	1.00659	1.00281	1.00034	1.00222	0.997619	1.00211	1.00341			2.2	1.0006	0.996723	0.99833	0.999275	0.998705	1.00478	0.998484	0.991373	0.997423	0.995271	1.0008	1.00245	1.00059	1.00642	1.00613	1.00281	0.999978	1.00734	1.00397
	2.3	1.00174	1.00544	1.00417	1.0012	0.995881	0.999632	1.00135	1.00423	1.00038	1.00401	1.00284	1.00284	1.00443	1.00281	0.997193	1	0.999764	1.00412	1.00096			2.3	1.00059	1.00045	1.00297	0.999275	0.99595	1.00248	0.995141	1.00062	0.995657	1.00393	0.997731	1.00245	1.00264	1.00084	0.999767	0.998188	1.00222	1.0064	1.00397
	2.4	1.0018	1.00325	1.00314	1.00221	1.0029	1.00331	1.0003	1.00645	1.00673	1.00746	1.00103	1.00103	1.00659	1.0037	0.997193	0.998888	0.996546	0.993072	0.998503			2.4	1.00007	1.00169	1.00413	1.00048	0.997328	1.00363	0.998484	0.994736	0.998305	1.00566	1.00182	1.00043	1.00162	0.997114	0.992345	1.00004	0.997733	1.00174	1.00397
	2.5	1.00111	0.995566	0.997975	1.00323	0.995881	1.00453	1.00453	1.00423	0.999322	0.994509	1.00466	1.00466	1.00226	1.00637	0.99824	1.00334	1.00084	1.0001	0.99973			2.5	1.00047	0.997964	0.99833	1.0029	1.00008	1.00593	1.00406	0.999781	1.00007	1.00653	1.00182	0.997388	1.00264	0.998976	0.996586	1.00466	0.997733	0.995201	0.997734
	2.6	1.00087	0.994468	0.996942	1.00424	1.0029	1.00331	1.00453	1.00645	1.00567	0.997099	1.00194	1.00194	1.00443	1.00014	0.996145	0.997775	0.996546	1.00512	0.99605			2.6	1.00008	0.997964	0.996011	0.999275	0.998705	1.00478	1.00406	1.00146	1.00095	1.0048	1.0008	1.00245	0.996497	0.996183	0.998707	0.99634	0.997733	1.00174	1.00293
	2.7	1.00118	0.998858	1.00211	1.00932	1.0029	1.00576	1.00241	1.00313	1.00038	0.997963	0.997409	0.997409	1.00334	1.00281	0.996145	1.00445	0.999764	0.996084	1.00096			2.7	1.0021	0.999206	0.99949	1.00169	1.00284	1.00133	1.00071	1.00651	0.998305	1.0022	1.00489	1.00448	1.00981	0.999907	1.00189	1.00281	1.0011	1.0008	0.999813
	2.8	1.00044	0.995566	1.00211	1.0012	1.0029	1.00453	1.00241	1.00645	1.00038	0.992783	1.00013	1.00013	1.00334	1.00103	0.995098	1.00445	1.00084	0.996084	0.998503			2.8	0.999753	0.999206	1.00065	1.00169	1.00008	1.00133	0.99737	1.00819	1.00448	1.00566	0.998753	0.992325	0.994449	0.991528	1.00507	0.998188	0.998855	0.998936	0.998774
	2.9	0.99926	0.991175	0.997975	1.0012	1.0029	0.997182	1.00347	1.00756	0.999322	0.996236	0.994691	0.994691	1.00226	0.991252	0.997193	1.00445	1.00084	1.00211	1.00218			2.9	1.00118	0.996723	0.994852	1.00169	0.998705	1.00478	0.998484	1.00399	1.00007	1.00653	0.997731	1.00043	1.00264	1.0027	1.00507	1.00096	1.00222	1.0008	1.00293
	3	1.00128	0.999956	1.00727	1.00221	1.00524	0.995957	1.00453	1.00756	1.00356	1.00228	0.996503	0.996503	1.00009	0.995697	0.99824	1.00445	1.00298	0.999096	1.00096			3	1.00177	0.999206	1.00181	1.0029	1.00008	1.00248	0.999599	0.9981	0.998305	1.0022	1.00386	1.00144	1.00879	0.998045	1.00295	1.00466	1.0011	1.00454	1.00189
	3.1	0.99985	0.996663	1.00521	1.0012	1.00524	0.999632	1.00347	1.00645	0.999322	0.994509	0.997409	0.997409	0.997917	0.994808	0.99824	1.00222	0.999764	0.998092	0.99973			3.1	1.00138	1.00045	1.00065	1.00169	1.00146	1.00133	1.00183	0.999781	0.999188	0.996137	1.00182	1.00954	1.00674	0.998045	1.00189	1.00466	0.999978	1.0008	0.998774
	3.2	0.999916	0.998858	1.00417	0.999167	1.00407	0.999632	1.00347	0.9998	0.991912	0.993646	1.00466	1.00466	0.999002	0.997475	0.995098	0.993326	0.996546	1.00713	1.00586			3.2	1.00141	0.997964	1.00065	1.00169	1.00422	1.00133	1.00183	0.993054	0.999188	1.00566	0.997731	1.00448	1.00059	0.998045	1.00401	1.00743	1.00222	1.00547	0.999813
	3.3	1.00011	0.994468	1.00004	0.999167	1.00875	0.998407	1.00347	1.00202	0.995088	1.00142	1.00556	1.00556	0.999002	1.00103	0.996145	0.991101	0.995473	1.00311	1.00218			3.3	1.00083	0.997964	0.997171	1.0029	1.00146	1.00133	1.00851	1.00399	1.00095	1.0074	0.997731	1.00043	1.00264	0.99339	1.00613	1.00373	0.996611	0.998002	0.994616
	3.4	1.00107	0.997761	1.00727	1.00018	1.00173	0.999632	1.00559	1.00202	0.996147	0.997963	1.00556	1.00556	1.00009	1.00281	1.00138	0.993326	1.00191	0.998092	1.00218			3.4	1.00039	1.00045	0.99949	1.00169	1.00284	0.999035	1.00406	1.00146	1.00272	1.01086	0.994664	0.999413	0.995473	0.991528	0.998707	1.00096	1.0011	1.00174	1.00085
	3.5	1.0014	0.990077	0.999008	1.00018	1.00524	0.998407	1.00559	1.00423	1.0025	1.00573	1.00013	1.00013	1.00009	1.00637	1.00138	0.997775	1.00191	1.00311	1.00341			3.5	1.00092	0.996723	0.996011	1.00169	1.00422	1.00018	1.00183	1.0023	1.00007	1.01	0.997731	0.996375	0.996497	0.996183	0.998707	1.00558	1.00222	1.00827	1.00189
	3.6	1.0022	0.996663	1.00521	1.00323	1.00758	0.999632	1.0003	0.996475	0.997205	1.00142	1.00466	1.00466	1.00009	1.00281	1.00557	1.00222	1.00405	1.00311	1.00464			3.6	1.00065	0.999206	0.99833	1.00048	1.00146	1.00018	1.00071	1.00903	1.00184	1.01606	0.994664	0.992325	0.992401	0.996183	0.999767	1.00096	1.00334	1.00174	1.00293
	3.7	0.999922	0.996663	1.00727	1.00323	1.00056	0.997182	0.997121	0.990933	1.00038	1.00487	0.999221	0.999221	0.994663	0.998364	1.00662	0.995551	1.00513	1.00311	0.998503			3.7	1.00234	1.00169	0.997171	1.00411	1.00422	1.00248	1.00183	1.00314	1.00184	1.00653	0.998753	1.00448	0.998546	0.997114	1.00189	1.00466	1.00447	1.00734	1.00189
	3.8	0.999298	0.995566	1.00314	0.997137	0.999391	0.995957	0.999238	0.995367	1.00462	0.998826	0.999221	0.999221	0.997917	0.999253	1.00243	0.995551	1.00191	1.00412	0.998503			3.8	1.00051	1.00169	0.997171	1.00411	1.00559	1.00133	1.00406	0.9981	0.99654	1.00047	0.996708	0.997388	0.995473	0.994321	1.00189	1.00466	1.00334	1.00454	1.00189
	3.9	1.0007	0.998858	1.00831	1.00526	1.00407	0.997182	0.998179	0.995367	1.00038	0.998826	0.999221	0.999221	0.992494	1.00192	1.00453	0.992214	1.0062	1.00813	1.00218			3.9	1.00102	1.00045	0.997171	1.00411	1.00284	1.00018	1.00183	1.00399	1.00537	1.0022	0.996708	1.00245	0.99957	0.995252	0.997646	1.00004	1.00334	1.00547	0.999813
	4	1.00129	0.997761	1.00624	1.00221	0.998221	0.997182	0.997121	0.99315	1.00038	0.999689	1.00284	1.00284	1.00009	1.00192	1.00662	1	1.00835	1.00512	1.00341			4	1.00155	1.00417	1.00181	1.00169	1.00146	0.996739	1.00294	1.00987	1.00007	1.00047	0.993642	0.99435	0.998546	0.998045	0.997646	1.00558	1.00783	1.01107	1.00189
	4.1	1.00038	0.995566	1.00211	1.00018	0.999391	0.997182	0.995004	0.994258	0.995088	0.999689	1.00194	1.00194	0.995748	1.00014	1.00557	1.00222	1.00298	1.00713	1.01077			4.1	1.00084	1.00169	1.00065	0.998067	1.00284	0.99559	1.00406	1.00735	0.997423	1.00913	0.999775	1.00346	0.99957	0.99339	0.993406	1.00189	1.00447	1.0036	0.998774
	4.2	1.001	0.992273	1.00314	0.999167	1.00056	0.997182	0.998179	0.992042	0.998264	1.00142	1.00556	1.00556	0.995748	1.00459	1.00976	0.998888	1.00191	1.00914	1.00464			4.2	1.0014	1.00045	1.00065	0.998067	1.00284	0.996739	0.998484	1.01239	1.00095	1.00393	0.996708	1.00549	1.00059	0.999907	0.999767	1.00281	1.00334	1.0064	0.995656
	4.3	0.998936	0.992273	1.00314	1.00323	1.0029	0.998407	0.993945	0.987608	0.999322	1.00055	1.00103	1.00103	0.994663	1.00192	1.00034	0.993326	0.997619	1.00613	1.00341			4.3	1.0025	1.00169	1.00181	0.996858	1.00284	0.996739	1.00183	1.01239	1.00095	1.0048	0.994664	0.999413	0.997522	0.998976	1.00613	1.00743	1.00222	1.01481	1.00397
	4.4	0.998419	0.991175	1.00417	1.00221	1.00524	0.997182	0.992887	0.987608	0.992971	0.993646	1.00013	1.00013	0.992494	1.00459	1.00976	0.994438	0.997619	1.00311	1.00218			4.4	1.00145	1.00169	0.99949	1.00048	1.00559	0.994442	0.992913	1.00903	0.997423	1.0022	1.0008	1.00245	1.00162	0.997114	1.00401	1.00373	1.0011	1.01014	1.00189
	4.5	1.00003	0.99337	1.00521	1.00729	1.00524	1.00208	0.996062	0.994258	0.999322	1.01091	0.995597	0.995597	0.992494	0.997475	1.00243	0.996663	0.995473	1.00512	1.00586			4.5	1.00084	1.00417	1.00297	0.996858	1.00559	0.994442	0.996256	1.00903	0.998305	0.991806	0.996708	1.00346	0.997522	0.998045	1.00401	1.00189	1.00222	1.01107	1.00085
	4.6	1.00107	0.996663	1.00831	1.00323	1.00524	0.998407	0.997121	0.997584	0.997205	1.00314	0.998315	0.998315	0.992494	1.00548	1.00348	1.00445	0.998691	1.00412	1.00709			4.6	0.999583	1.00045	0.99833	0.996858	1.00422	0.997887	0.995141	1.00735	0.999188	0.994404	0.993642	0.992325	0.993425	1.00363	1.00189	1.00373	0.999978	1.00921	1.00085
	4.7	1.00065	0.998858	1.00934	1.00526	1.00173	0.998407	0.992887	0.996475	0.998264	1.00573	1.00013	1.00013	0.997917	1.00548	1.00034	0.996663	0.997619	1.00311	1.00341			4.7	1.0009	1.00293	0.99949	0.996858	1.00559	0.99559	0.995141	1.00062	0.997423	0.998735	0.996708	1.00245	1.00264	1.00177	0.999767	1.00096	1.00222	1.00921	1.00813
	4.8	0.996807	0.997761	1.00624	0.989013	0.986519	0.987382	0.995004	0.996475	0.996147	1.00142	1.00194	1.00194	0.996833	1.00548	0.995098	0.992214	0.995473	0.999096	0.998503			4.8	1.00148	1.00541	1.00297	1.00048	1.00835	0.997887	0.998484	1.0023	0.995657	0.993538	0.996708	1.00144	0.996497	1.0027	0.999767	1.00189	1.00334	1.01014	1.00917
	4.9	0.999529	0.994468	1.00417	1.00628	1.00407	0.997182	0.992887	0.995367	1.0025	0.997099	1.00103	1.00103	1.00009	0.999253	0.997193	0.993326	1.00084	1.0001	1.00464			4.9	1.00196	1.00417	0.997171	1.00048	1.00835	1.00018	0.995141	1.00483	0.999188	1.0022	0.993642	0.996375	0.992401	1.00084	1.00613	1.00651	1.00559	1.01387	1.00813
	5	0.998214	0.98898	1.00417	1.00323	0.999391	0.994732	0.991828	0.994258	0.999322	0.996236	0.999221	0.999221	0.997917	0.999253	0.999288	0.996663	0.997619	1.00311	1.00341			5	1.00153	1.00417	0.99833	1.00048	1.00697	1.00478	0.99737	1.00146	0.998305	1.00307	0.992619	0.995362	0.997522	1.00177	0.999767	1.00651	1.00559	1.00734	1.00605
	5.1	0.999681	0.992273	1.00624	1.00526	1.00056	0.995957	0.99077	0.992042	1.00038	1.00401	1.00194	1.00194	0.997917	1.00192	0.99824	0.992214	1.00084	1.00713	1.00464			5.1	1.00291	1.00665	1.00181	0.996858	1.00284	1.00133	0.994027	1.01408	0.998305	0.998735	0.994664	0.995362	0.99957	1.00922	1.00613	1.0139	1.00334	1.0064	1.00917
	5.2	0.997839	0.985687	1.00004	1.0144	1.00875	0.991057	0.991828	0.989825	0.991912	0.994509	0.996503	0.996503	0.995748	1.00014	1.00348	0.992214	1.00298	1.00211	1.00341			5.2	0.999538	1.00293	0.997171	0.998067	1.00559	0.999035	0.990684	1.00651	0.995657	1.00307	0.991597	0.989287	0.990353	1.0027	0.997646	1.00373	1.00334	1.00827	1.00605
	5.3	0.999703	0.990077	1.00624	1.01541	1.01226	0.987382	0.995004	0.994258	1.0025	1.00487	1.00013	1.00013	0.997917	0.997475	0.995098	0.992214	0.997619	1.00512	1.00096			5.3	1.00179	1.00665	1.00297	1.0029	1.00973	1.00018	0.991798	1.00567	0.991244	0.999602	0.998753	0.992325	0.99957	1.00177	1.00083	1.00836	1.00334	1.00734	1.00917
	5.4	0.999112	0.990077	1.00417	1.01744	1.01695	0.989832	0.991828	0.992042	0.999322	0.998826	0.991974	0.991974	0.994663	0.995697	1.00243	0.995551	0.998691	1.00914	1.00341			5.4	1.00219	1.00665	1.00297	0.998067	1.00697	1.00018	0.989569	1.00483	0.99654	1.00393	1.0008	0.995362	1.00162	1.00363	1.00295	1.00836	1.00783	1.00827	1.00085
	5.5	0.999881	0.991175	1.00314	1.01948	1.01812	0.991057	0.997121	0.992042	1.00038	0.998826	0.996503	0.996503	0.994663	1.00014	0.999288	0.993326	0.993328	1.00813	1.00464			5.5	1.0017	1.00789	1.00181	0.99565	1.00835	1.00133	0.991798	1.00567	0.99654	0.999602	0.996708	0.995362	0.995473	1.00735	0.998707	1.00836	1.00783	1.00827	1.00397
	5.6	1.00034	0.99337	1.00831	1.01744	1.01695	0.991057	0.992887	0.990933	1.00144	1.00142	0.997409	0.997409	0.996833	1.0037	1.00138	0.991101	0.9944	1.00914	1.00096			5.6	1.00144	1.00665	1.00065	0.996858	1.00835	0.996739	0.989569	1.00146	0.998305	1.0022	0.998753	0.9984	0.996497	1.00084	1.00083	1.00743	1.01008	1.00827	1.00397
	5.7	0.998611	0.990077	1.00107	1.01338	1.01343	0.988607	0.992887	0.988716	1.00144	0.999689	0.993785	0.993785	0.993579	1.00192	1.00034	0.993326	0.9944	1.01115	1.00341			5.7	1.00205	1.00789	1.00065	0.999275	1.0111	0.997887	0.989569	1.00819	0.995657	1.00826	0.991597	0.99435	0.99957	1.0027	0.993406	1.00651	1.00896	1.01107	1.01021
	5.8	0.998795	0.990077	1.00314	1.00729	1.00875	0.984932	0.995004	0.992042	1.00144	0.994509	0.996503	0.996503	0.991409	1.00192	1.00243	0.994438	1.00191	1.01014	1.00586			5.8	1.00176	1.00914	0.99949	0.99565	1.00284	1.00133	0.991798	1.00146	0.995657	1.00826	0.996708	0.996375	1.00367	1.00456	0.995526	1.00558	1.00334	1.01107	1.00917
	5.9	0.998492	0.98898	0.999008	1.01338	1.01812	0.989832	0.998179	0.988716	1.0025	1.00142	0.991974	0.991974	0.990325	0.99303	1.00243	0.994438	0.998691	1.01014	0.99973			5.9	1.002	1.00665	0.99833	0.99565	1.00146	1.00478	0.990684	1.01071	0.997423	1.00653	0.995686	0.993337	1.00059	1.00549	0.995526	1.00651	1.0112	1.00734	1.00813
	6	1.00133	0.995566	1.00521	1.02252	1.02163	0.994732	0.987594	0.983174	1.00356	1.00314	1.00284	1.00284	0.995748	0.997475	1.00453	0.995551	0.999764	1.00713	1.00096			6	1.00261	1.00789	0.996011	0.99565	1.00284	1.00707	0.991798	1.01155	0.997423	1.0074	0.998753	0.997388	1.01084	1.00084	0.999767	1.00558	1.00447	1.00454	1.00709
	6.1	1.00053	0.99337	1.00314	1.01846	1.02046	0.989832	0.992887	0.989825	0.999322	0.998826	1.00466	1.00466	0.992494	1.00281	0.999288	0.992214	0.995473	1.00713	1.00464			6.1	1.00239	1.00789	0.996011	0.99565	1.00284	1.00822	0.988455	1.00651	0.994775	1.00566	0.997731	0.999413	1.00367	1.00642	0.990225	1.01113	1.01008	1.00921	1.00917
	6.2	0.999071	0.990077	1.00314	1.01541	1.01695	0.989832	0.989711	0.987608	1.00462	0.996236	0.996503	0.996503	0.983816	0.999253	0.996145	1.00222	0.998691	1.01315	1.00341			6.2	0.999698	1.01162	0.997171	0.994442	0.998705	1.00363	0.987341	1.00651	0.993009	1.0022	0.996708	0.993337	0.994449	1.00735	0.995526	1.00373	1.00334	1.0036	1.00189
	6.3	0.998794	0.98898	1.00417	1.01744	1.02397	0.992282	0.989711	0.987608	0.995088	0.994509	0.996503	0.996503	0.981647	0.991252	0.999288	1.00334	0.999764	1.00914	1.00709			6.3	1.00057	1.01162	0.996011	0.994442	1.00008	1.00133	0.983997	1.00567	0.993892	0.997869	0.998753	0.989287	0.998546	1.00549	0.992345	1.00558	1.01008	1.01201	1.01332
	6.4	0.998954	0.990077	1.00521	1.01643	1.01929	0.991057	0.991828	0.987608	0.994029	0.997099	0.997409	0.997409	0.98924	0.994808	1.00138	0.995551	0.999764	1.00713	1.00586			6.4	1.00274	1.01162	0.997171	0.993233	1.00146	1.00133	0.983997	1.02164	1.00095	1.00307	1.00182	0.99435	1.00059	1.00922	0.992345	1.00466	1.00671	1.01387	1.01125
	6.5	0.999102	0.99337	1.00727	1.01744	1.0146	0.989832	0.988653	0.982066	1.00038	1.00228	0.996503	0.996503	0.98924	0.995697	0.997193	0.998888	0.998691	1.00813	1.00709			6.5	1.00081	1.00789	0.994852	0.99565	1.00008	1.00018	0.985112	1.01071	0.994775	1.00566	1.00284	0.99435	0.99957	1.00456	0.993406	1.00281	1.00671	1.00734	1.00813
	6.6	0.998895	0.991175	1.00624	1.01541	1.0146	0.989832	0.99077	0.986499	0.999322	0.992783	0.997409	0.997409	0.992494	0.998364	1.00138	0.996663	0.999764	1.00412	1.00586			6.6	1.00083	0.997964	0.997171	0.99565	1.00146	1.00133	0.986226	1.0166	0.997423	1.00653	0.995686	0.992325	0.997522	1.0027	0.994466	1.00281	1.01008	1.01294	1.00605
	6.7	0.997557	0.991175	1.00521	1.01135	1.01343	0.988607	0.987594	0.985391	0.996147	0.99192	0.991068	0.991068	0.98924	0.998364	0.999288	0.997775	0.995473	1.01215	1.01077			6.7	1.00034	1.01286	0.991373	0.99565	1.00146	0.997887	0.988455	1.0023	0.993009	1.00047	0.998753	0.999413	0.99957	1.00084	0.997646	1.00928	1.00671	1.00547	1.00501
	6.8	0.999539	0.991175	1.00727	1.00932	1.0146	0.992282	0.988653	0.99315	0.996147	0.998826	0.995597	0.995597	0.988155	0.998364	0.99824	1.00222	1.00084	1.01416	1.00709			6.8	1.00054	1.00665	0.996011	0.996858	1.00697	0.993294	0.989569	1.00987	0.991244	1.00133	0.999775	0.995362	0.994449	0.998045	0.998707	1.01298	1.00447	1.01014	1.00397
	6.9	0.998175	0.990077	1.00314	1.01135	1.01577	0.992282	0.986536	0.987608	0.999322	0.999689	0.995597	0.995597	0.988155	1.00014	0.99405	0.994438	1.00084	1.00914	1.00341			6.9	1.00149	1.00914	0.993692	0.994442	1.00146	0.99559	0.994027	1.00903	1.00007	0.999602	1.0008	0.999413	0.996497	1.00177	0.996586	1.0102	1.00559	1.01294	1.00605
	7	0.999005	0.992273	1.00521	1.01135	1.01695	0.992282	0.986536	0.983174	0.997205	1.00142	0.996503	0.996503	0.992494	1.0037	0.99405	0.998888	0.996546	1.01115	1.00586			7	1.0009	1.00541	0.993692	0.99565	1.00422	0.99559	0.985112	1.01492	0.997423	1.0048	0.999775	0.996375	0.996497	0.998976	0.994466	1.00928	1.00559	1.00921	1.00917
	7.1	0.998922	0.98898	1.00211	1.01338	1.01812	0.994732	0.989711	0.986499	1.00144	1.00314	0.994691	0.994691	0.988155	1.00281	0.99824	0.996663	0.995473	1.00713	1.00464			7.1	1.00122	1.00665	0.992533	0.994442	1.00146	1.00248	0.988455	1.00987	0.994775	1.0022	1.0008	0.9984	1.00162	1.0027	0.994466	1.00928	1.00447	1.00921	1.00813
	7.2	0.999004	0.98898	1.00417	1.01541	1.01812	0.994732	0.988653	0.985391	0.997205	0.998826	0.994691	0.994691	0.985986	1.00103	0.997193	1.00222	0.999764	1.00914	1.00586			7.2	1.00041	1.00541	0.993692	0.994442	1.00146	0.997887	0.987341	1.01324	0.999188	1.0022	0.996708	0.988274	0.989328	1.00549	0.995526	1.00743	1.0112	1.00827	1.01021
	7.3	0.998547	0.991175	1.00211	1.01643	1.01812	0.997182	0.99077	0.989825	0.994029	1.00314	0.993785	0.993785	0.984901	1.00281	0.986718	0.994438	0.997619	1.01115	1.00586			7.3	1.00115	1.00665	0.992533	0.99565	1.00008	0.999035	0.990684	1.00903	0.998305	1.00307	0.999775	0.99435	0.996497	1.01015	0.996586	1.00743	1.00671	1.00921	1.00501
	7.4	0.998314	0.991175	1.00417	1.00831	1.01343	0.986157	0.989711	0.985391	1.00144	1.00401	0.993785	0.993785	0.98924	0.998364	0.993003	0.996663	0.999764	1.01416	1.00709			7.4	1.00208	1.00914	0.993692	0.994442	1.00008	0.996739	0.987341	1.00819	0.997423	1.0074	1.00182	0.999413	1.00264	1.00735	0.994466	1.01113	1.00896	1.01014	1.00709
	7.5	0.999466	0.98898	1.00624	1.01541	1.01695	0.991057	0.99077	0.988716	0.999322	1.00487	0.995597	0.995597	0.991409	0.999253	0.996145	1	0.999764	1.00813	1.00218			7.5	1.00077	1.01162	0.994852	0.99565	1.00008	1.00248	0.987341	1.01239	0.993892	1.00653	1.0008	0.989287	0.995473	1.00456	0.993406	1.00281	1.00447	1.01014	1.00813
	7.6	0.996835	0.98898	1.00624	1.01541	1.0146	0.991057	0.991828	0.989825	0.998264	0.999689	0.98835	0.98835	0.985986	0.993919	0.995098	0.994438	0.995473	1.00211	1.00341			7.6	1.00132	1.01162	0.994852	0.998067	0.997328	1.00822	0.991798	1.01155	0.993892	1.00393	1.0008	0.988274	0.996497	1.00735	0.992345	1.00836	1.00447	1.00734	1.00709
	7.7	0.997712	0.996663	1.00521	1.0144	1.01343	0.987382	0.991828	0.987608	1.00038	0.997963	0.987444	0.987444	0.988155	0.99303	0.997193	0.997775	0.998691	1.00713	1.00709			7.7	1.00082	1.00914	0.992533	0.996858	1.00146	1.00937	0.987341	1.00903	0.994775	1.0074	0.997731	0.984224	0.995473	1.00735	0.992345	1.01113	1.00334	1.00921	1.00605
	7.8	0.999082	0.996663	1.00417	1.01948	1.01577	0.992282	0.986536	0.988716	0.997205	0.998826	0.998315	0.998315	0.990325	0.995697	0.996145	0.995551	0.995473	1.00813	1.00586			7.8	1.00319	1.01162	0.992533	1.00048	1.00422	1.01626	0.989569	1.00146	0.990361	1.01086	1.00182	0.992325	1.00162	1.00829	0.994466	1.01205	1.01232	1.01107	1.00605
	7.9	0.998724	0.992273	0.996942	1.01744	1.02046	0.994732	0.989711	0.99315	0.998264	0.998826	0.99288	0.99288	0.991409	0.994808	0.996145	0.991101	0.996546	1.01115	1.00832			7.9	1.00124	1.00914	0.994852	1.00169	1.00284	1.01167	0.981769	1.00399	0.994775	1.00307	0.998753	0.9903	0.993425	1.00363	0.996586	1.01205	1.00671	1.01107	1.00605
	8	1.00063	0.997761	1.00521	1.01744	1.01812	0.995957	0.986536	0.986499	1.0025	1.00055	0.99288	0.99288	0.992494	0.994808	1.00348	1.00111	1.00191	1.01416	1.00709			8	1.00278	1.00789	0.997171	0.996858	0.997328	1.00707	0.985112	1.01408	0.992127	1.0022	1.00182	1.00144	1.00264	1.00363	0.995526	1.01298	1.00896	1.01294	1.01021
	8.1	0.998273	0.996663	1.00211	1.01846	1.00992	0.993507	0.988653	0.985391	1.00462	1.00401	0.990162	0.990162	0.990325	0.99303	0.996145	0.994438	0.996546	1.01014	1.00464			8.1	1.00181	1.01038	0.992533	1.00048	1.00559	1.00707	0.983997	1.01492	0.994775	1.00653	0.998753	0.9903	0.996497	1.00735	0.996586	1.00466	1.00671	1.00827	1.00709
	8.2	1.00033	0.994468	1.00521	1.01541	1.01812	0.993507	0.995004	0.989825	0.999322	1.00314	0.991974	0.991974	0.993579	0.998364	0.99824	0.993326	1.00084	1.01416	1.00954			8.2	1.00104	1.00789	0.993692	0.996858	0.997328	1.00593	0.981769	1.00314	0.991244	1.0022	0.999775	0.99435	0.99957	1.00177	0.996586	1.00651	1.0112	1.01667	1.01228
	8.3	1.00185	0.996663	1.00417	1.01846	1.01812	0.992282	0.991828	0.989825	0.997205	1.00314	0.998315	0.998315	0.994663	1.0037	1.00348	0.998888	1.00298	1.01416	1.00709			8.3	1.00285	1.01038	0.996011	1.00048	1.00284	1.00478	0.989569	1.01576	0.998305	1.0022	0.998753	0.996375	1.00162	0.998976	0.995526	1.00558	1.00896	1.01294	1.01228
	8.4	0.998679	0.996663	1.00417	1.01846	1.0146	0.993507	0.991828	0.986499	0.996147	0.997963	0.991068	0.991068	0.98924	0.99303	0.995098	0.995551	0.997619	1.01416	1.00954			8.4	1.00368	1.01286	0.996011	1.00048	1.00284	1.00018	0.990684	1.01744	0.993892	1.01779	0.997731	0.9984	1.00264	1.00642	0.995526	1.00836	1.00559	1.00921	1.01021
	8.5	1.00036	0.996663	1.00211	1.01948	1.01812	0.993507	0.987594	0.988716	1.00144	0.999689	0.991974	0.991974	0.992494	1.00014	0.999288	1.00334	1.00513	1.01014	1.00464			8.5	1.0026	1.01162	0.992533	1.00411	1.00559	1.00018	0.987341	1.01239	0.994775	1.0074	0.999775	0.996375	1.00264	1.0027	0.995526	1.00836	1.00447	1.01294	1.00813
	8.6	1.00035	0.995566	1.00417	1.01846	1.01812	0.993507	0.991828	0.989825	1.0025	0.996236	0.994691	0.994691	0.990325	1.00281	0.996145	0.998888	1.00084	1.01315	1.00464			8.6	1.0018	1.00914	0.987895	0.998067	1.00008	0.994442	0.989569	1.02333	0.991244	1.01259	0.997731	0.995362	0.994449	0.998045	0.994466	1.01113	1.00559	1.01387	1.0154
	8.7	0.999952	0.995566	0.999008	1.01846	1.01226	0.997182	0.989711	0.988716	1.00673	1.00055	0.994691	0.994691	0.990325	0.999253	0.997193	0.998888	1.00191	1.00813	1.00586			8.7	1.00168	1.00665	0.993692	0.999275	1.00146	0.999035	0.991798	1.00819	0.995657	1.0048	0.998753	0.9984	0.994449	1.0027	0.997646	1.00743	1.00447	1.01667	1.00917
	8.8	0.998839	0.99337	0.995909	1.02252	1.02163	0.995957	0.991828	0.989825	1.00885	0.998826	0.98835	0.98835	0.983816	0.995697	0.99824	0.997775	0.997619	1.00713	1.00341			8.8	1.00328	1.00914	0.993692	1.00048	1.00422	1.00363	0.996256	1.01155	0.993892	1.01	0.999775	0.999413	1.00367	0.999907	0.995526	1.00743	1.00447	1.01481	1.01125
	8.9	0.999833	0.996663	1.00107	1.01744	1.01812	0.992282	0.991828	0.988716	0.998264	0.994509	0.993785	0.993785	0.98707	1.00903	1.00034	0.997775	1.00298	1.01115	1.00218			8.9	1.00348	1.01038	0.99949	1.00048	1.00697	1.00133	0.989569	1.00987	0.99654	1.0048	0.997731	0.9984	1.00059	0.998045	0.997646	1.0102	1.00559	1.01854	1.01644
	9	0.99922	0.99337	1.00004	1.01744	1.01343	0.995957	0.989711	0.988716	0.997205	0.996236	0.991974	0.991974	0.984901	1.00192	0.999288	1.00111	1.00298	1.01014	1.00954			9	1.00345	1.01162	0.994852	1.0029	1.00422	1.00363	0.994027	1.00735	0.991244	1.00826	1.0008	0.997388	1.00059	1.00084	1.00083	1.0102	1.00334	1.01667	1.01332
	9.1	0.999708	0.992273	1.00211	1.0144	1.01695	0.997182	0.989711	0.989825	1.0025	0.996236	0.995597	0.995597	0.988155	1.01081	0.995098	0.989989	0.9944	1.01315	1.01077			9.1	1.00218	1.00665	0.994852	1.00169	1.00284	1.00133	0.990684	1.00987	0.994775	1.00307	0.996708	0.99435	0.994449	0.999907	0.998707	1.01298	1.00559	1.01947	1.01125
	9.2	0.999268	0.994468	1.00211	1.01846	1.01695	0.997182	0.99077	0.988716	0.996147	0.996236	0.991974	0.991974	0.983816	0.999253	0.993003	0.996663	1.00084	1.02119	1.00709			9.2	1.00281	1.00541	0.993692	1.00169	1.00422	1.00363	0.991798	1.00819	0.993009	1.0022	0.997731	0.9984	1.00367	0.998976	1.00083	1.01298	1.00222	1.01854	1.01332
	9.3	0.998749	0.998858	1.00314	1.01948	1.01929	0.997182	0.991828	0.990933	0.990854	0.988466	0.991068	0.991068	0.985986	1.00103	0.990908	0.994438	0.998691	1.01717	1.00709			9.3	1.00263	1.00665	0.992533	1.00169	1.00422	1.00593	0.995141	1.01155	0.994775	0.997869	0.997731	0.993337	0.997522	0.996183	1.00507	1.01298	1.00447	1.01947	1.01021
	9.4	1.00001	0.999956	1.00417	1.02151	1.01929	0.994732	0.987594	0.985391	0.995088	1.00055	0.995597	0.995597	0.991409	1.00103	0.995098	0.994438	0.998691	1.01416	1.00586			9.4	1.00124	1.00541	0.997171	1.00048	1.00146	1.00133	0.995141	1.01155	0.992127	1.00133	0.993642	0.995362	0.994449	0.997114	0.995526	1.01205	1.0011	1.01481	1.01228
	9.5	0.998939	0.996663	1.00004	1.02049	1.01695	0.995957	0.989711	0.987608	0.995088	0.994509	0.995597	0.995597	0.98924	1.00281	0.99405	0.993326	0.995473	1.01315	1.00464			9.5	1.00223	1.00789	0.996011	0.999275	1.00008	0.999035	0.991798	1.00987	0.993892	0.997003	0.997731	0.995362	1.00059	1.0027	0.998707	1.0102	1.00896	1.01667	1.01436
	9.6	0.99895	0.996663	1.00107	1.02354	1.01812	0.997182	0.986536	0.989825	0.991912	0.999689	0.994691	0.994691	0.984901	0.995697	0.990908	0.998888	0.996546	1.01315	1.00709			9.6	1.00321	1.01038	0.99833	1.00169	1.00008	1.00133	0.995141	1.01828	0.995657	1.0022	0.999775	0.99435	1.00162	0.998976	0.990225	1.01298	1.00671	1.01667	1.01332
	9.7	1.0003	0.997761	1.00211	1.02354	1.02046	0.997182	0.987594	0.990933	0.990854	1.00142	0.993785	0.993785	0.98707	1.00192	0.996145	0.997775	0.999764	1.01617	1.00709			9.7	1.00265	1.01038	1.00065	0.999275	1.00284	1.00133	0.986226	1.00483	0.992127	1.00393	0.999775	0.999413	0.99957	1.00363	0.997646	1.01945	1.00447	1.01201	1.01021
	9.8	0.99977	0.994468	1.00107	1.02455	1.01929	1.00086	0.987594	0.989825	0.986619	0.997963	0.995597	0.995597	0.991409	1.00281	0.991955	0.993326	1.00513	1.01315	1.00464			9.8	1.00182	1.01038	0.99833	1.00169	1.00284	1.00133	0.992913	1.00735	0.992127	1.01	0.994664	0.993337	0.991377	0.995252	0.987044	1.0102	1.00896	1.01854	1.01644
	9.9	0.998942	0.994468	1.00004	1.02861	1.02163	0.995957	0.988653	0.988716	0.988736	0.997099	0.989256	0.989256	0.98707	0.995697	0.997193	0.996663	1.00513	1.01215	1.00464			9.9	1.00065	1.00789	0.996011	0.999275	1.00284	1.00133	0.996256	1.00567	0.993009	1.00393	0.994664	0.997388	0.992401	0.99339	0.993406	1.00743	1.00559	1.01201	1.00917
	10	0.999959	0.995566	1.00314	1.02455	1.02397	0.993507	0.989711	0.988716	0.992971	0.996236	0.990162	0.990162	0.988155	1.00103	0.997193	0.996663	1.00405	1.01516	1.00832			10	1.00263	1.00789	0.997171	0.996858	1.00008	1.00707	0.995141	1.01071	0.992127	1.00307	0.999775	0.996375	0.996497	1.00177	0.992345	1.01298	1.00447	1.01761	1.0154
	10.1	0.999287	0.994468	1.00211	1.02049	1.02046	1.00086	0.988653	0.987608	0.992971	0.997963	0.994691	0.994691	0.982732	1.00103	0.99405	0.998888	1.0062	1.00713	1.00218			10.1	1.00219	1.00789	0.993692	1.00048	1.00008	1.00133	0.995141	1.01324	0.989479	1.0074	1.00284	1.0065	1.00162	0.995252	0.988105	1.00558	1.00671	1.01387	1.01021
	10.2	0.998465	0.994468	0.999008	1.02557	1.01929	0.995957	0.988653	0.986499	0.992971	0.999689	0.987444	0.987444	0.979478	1.00192	0.99405	0.991101	1.00513	1.01416	1.00954			10.2	1.0021	1.00914	0.994852	1.00169	1.00146	1.00363	0.989569	1.00903	0.98683	1.01173	0.995686	0.989287	0.98728	1.00363	0.999767	1.00928	1.01008	1.01947	1.0154
	10.3	0.998597	0.996663	1.00314	1.02354	1.01812	0.999632	0.991828	0.990933	0.990854	0.994509	0.982009	0.982009	0.981647	1.00281	0.993003	0.996663	1.00191	1.01717	1.00832			10.3	1.00262	1.00914	0.992533	1.00411	1.00146	1.00133	0.992913	1.00903	0.987713	1.01173	0.998753	0.9984	0.994449	0.999907	0.997646	1.0102	1.00783	1.01667	1.01332
	10.4	0.99686	0.995566	1.00211	1.0276	1.02397	0.999632	0.989711	0.989825	0.991912	1.00142	0.982915	0.982915	0.979478	0.998364	0.990908	0.995551	0.998691	0.998092	0.994823			10.4	1.00247	1.00789	0.994852	1.00048	0.998705	1.00248	0.986226	1.01408	0.990361	1.01346	0.999775	0.995362	0.993425	0.998976	1.00083	1.01482	1.00671	1.01574	1.01021
	10.5	0.998091	0.992273	0.997975	1.0276	1.02397	0.995957	0.993945	0.99315	0.987678	0.993646	0.984726	0.984726	0.980562	0.993919	0.99405	0.993326	1.00298	1.01315	1.012			10.5	1.00284	1.00914	0.991373	0.996858	0.99595	1.00478	0.989569	1.01828	0.989479	1.01259	0.999775	1.00043	1.00264	0.996183	0.996586	1.01205	1.01008	1.01201	1.01332
	10.6	0.998288	0.997761	1.00624	1.02354	1.01929	0.995957	0.989711	0.990933	0.999322	1.00228	0.98382	0.98382	0.980562	0.994808	0.995098	0.997775	1.00298	1.00311	1.00218			10.6	1.00168	1.00665	0.993692	0.999275	0.998705	1.00248	0.991798	1.01155	0.991244	1.01	1.00386	0.999413	0.993425	0.994321	0.996586	1.00743	1.00671	1.01294	1.01021
	10.7	0.997703	0.994468	1.00107	1.02151	1.01577	0.998407	0.986536	0.988716	0.994029	1.00314	0.987444	0.987444	0.981647	0.998364	0.995098	0.993326	0.998691	1.00713	1.00586			10.7	1.00354	1.00914	0.99833	0.999275	1.00146	1.00707	0.99737	1.01828	0.990361	1.01	0.998753	0.9903	0.993425	1.00177	1.00083	1.01205	1.00896	1.01201	1.01436
	10.8	0.995339	0.992273	1.00417	1.02354	1.01695	0.995957	0.985477	0.985391	0.990854	0.988466	0.985632	0.985632	0.979478	0.99303	0.99405	1.00222	0.997619	0.998092	0.997277			10.8	1.00307	1.01038	0.997171	0.998067	1.00008	1.00937	0.992913	1.01239	0.993892	1.0074	1.00284	0.997388	0.99957	1.00177	0.995526	1.01205	1.00222	1.01107	1.01125
	10.9	0.998476	0.994468	1.00417	1.02252	1.01695	0.998407	0.987594	0.988716	0.995088	0.995373	0.995597	0.995597	0.985986	0.996586	0.995098	0.991101	0.996546	1.00813	1.00464			10.9	1.00142	1.00914	0.99833	0.998067	0.998705	1.00478	0.994027	1.00735	0.985065	1.01	0.996708	0.992325	0.994449	0.998045	0.997646	1.01575	1.00559	1.00827	1.01125
	11	0.997861	0.996663	1.00727	1.02252	1.0228	0.997182	0.988653	0.992042	0.988736	0.998826	0.98835	0.98835	0.982732	0.996586	0.995098	0.989989	0.997619	1.00713	1.00096			11	1.00248	1.00789	0.993692	0.999275	1.00008	1.01282	0.990684	1.01408	0.991244	1.0048	1.0008	0.995362	0.995473	1.00084	1.00189	1.01298	1.00671	1.01107	1.00501
	11.1	0.998951	0.99337	1.00004	1.02252	1.02046	0.999632	0.985477	0.988716	0.996147	0.998826	0.991974	0.991974	0.990325	0.996586	0.99824	1.00222	1.00298	1.00311	0.998503			11.1	1.00288	1.00665	0.99833	0.99565	0.99595	1.01396	0.990684	1.00651	0.988596	1.00913	0.999775	0.9984	0.99957	0.999907	1.00189	1.01482	1.00783	1.01294	1.01125
	11.2	0.999515	0.997761	1.00314	1.02557	1.01929	0.998407	0.988653	0.994258	0.998264	1.00401	0.987444	0.987444	0.984901	0.998364	1.00138	0.997775	0.999764	1.00512	0.99973			11.2	1.0036	1.00293	0.997171	0.999275	1.00008	1.01052	0.992913	1.00903	0.987713	1.01086	0.999775	1.00144	1.00162	1.00084	0.999767	1.01667	1.00896	1.01294	1.01228
	11.3	1.00034	0.997761	1.00831	1.02557	1.01929	0.999632	0.986536	0.990933	1.00144	0.998826	0.99288	0.99288	0.98924	1.00103	1.00034	0.997775	1.00084	1.00311	0.99973			11.3	1.00435	1.00541	0.997171	0.996858	0.997328	1.01167	0.989569	1.0208	0.990361	1.01433	0.999775	0.99435	0.99957	0.996183	0.999767	1.01575	1.01457	1.01947	1.0154
	11.4	0.998008	0.997761	1.00314	1.02861	1.01812	0.997182	0.987594	0.994258	0.998264	0.998826	0.982009	0.982009	0.983816	0.992141	1.00034	0.995551	1.00191	1.00412	0.998503			11.4	1.00173	1.00541	0.993692	0.998067	1.00284	1.00593	0.995141	1.00987	0.984182	1.00653	0.999775	0.9984	1.00059	0.994321	0.993406	1.01113	1.00896	1.01481	1.00813
	11.5	0.998062	0.994468	1.00211	1.02354	1.01929	0.995957	0.99077	0.996475	0.990854	0.996236	0.98835	0.98835	0.985986	0.998364	0.997193	0.994438	1.00191	1.0011	0.99973			11.5	1.0005	1.00417	0.992533	0.99565	0.998705	1.00363	0.996256	1.00987	0.984182	1.00826	0.999775	0.995362	0.996497	0.991528	0.996586	1.01113	1.00447	1.01014	1.01021
	11.6	0.9988	0.994468	1.00107	1.02455	1.01929	0.998407	0.987594	0.988716	1.00144	1.00055	0.987444	0.987444	0.98707	0.997475	1.00034	1.00222	0.998691	1.00311	0.998503			11.6	1.00235	1.00665	0.991373	0.99565	1.00146	1.00363	0.992913	1.01576	0.985065	1.01086	0.997731	0.99435	0.996497	0.995252	0.994466	1.01852	1.01008	1.01667	1.0154
	11.7	0.998424	0.996663	1.00521	1.02049	1.02163	1.00208	0.989711	0.99315	0.995088	0.997963	0.989256	0.989256	0.98707	0.996586	0.997193	0.989989	0.998691	1.00311	0.998503			11.7	1.0024	1.00417	0.992533	0.998067	1.00422	1.00822	0.996256	1.01996	0.990361	0.997869	1.00182	0.996375	0.998546	0.99339	0.993406	1.01482	1.00896	1.01294	1.01125
	11.8	0.99868	0.996663	1.00107	1.02354	1.01929	0.999632	0.988653	0.989825	0.998264	0.997099	0.989256	0.989256	0.98924	0.993919	1.00243	0.998888	1.00084	1.0011	0.997277			11.8	1.00198	1.00541	0.992533	0.998067	1.00146	1.00248	0.999599	1.01155	0.988596	1.00307	1.00386	0.99435	0.995473	0.995252	0.993406	1.0176	1.00671	1.01294	1.01332
	11.9	1.00023	0.999956	1.00727	1.02252	1.02046	0.999632	0.986536	0.987608	0.991912	1.00142	0.989256	0.989256	0.988155	0.997475	1.00138	1.00667	1.00405	1.00713	1.00341			11.9	1.00264	1.00417	0.989054	0.999275	1.00422	1.00478	0.994027	1.01744	0.988596	1.01086	0.999775	0.995362	1.00059	0.998045	0.989165	1.02037	1.00559	1.01387	1.01228
	12	0.998407	0.997761	1.00521	1.02455	1.02046	0.998407	0.982302	0.988716	0.989795	1.00142	0.987444	0.987444	0.983816	0.993919	1.00034	0.997775	1.00513	1.00713	0.99973			12	1.00309	1.00293	0.993692	0.998067	1.00146	1.00363	0.996256	1.02837	0.988596	1.00393	0.998753	0.9984	1.00367	0.995252	0.992345	1.01667	1.00559	1.01574	1.01228
	12.1	0.998465	0.999956	1.00831	1.02557	1.0228	1.00086	0.985477	0.989825	0.987678	0.999689	0.986538	0.986538	0.984901	0.994808	0.997193	0.995551	1.00084	1.00613	0.99973			12.1	1.00271	1.00789	0.994852	0.994442	1.00008	1.00937	0.992913	1.02585	0.991244	1.00047	0.999775	0.991312	0.997522	0.995252	0.992345	1.01945	1.00783	1.01481	1.01332
	12.2	0.997835	0.997761	1.00521	1.02557	1.01812	1.00086	0.984419	0.987608	0.989795	1.00142	0.98382	0.98382	0.981647	0.990363	1.00034	0.997775	1.00298	1.00613	1.00341			12.2	1.00348	1.00789	0.997171	0.998067	1.00146	1.01396	0.990684	1.02501	0.993892	1.00307	0.997731	0.9903	0.996497	0.998976	0.989165	1.01945	1.00783	1.01294	1.01852
	12.3	0.999508	0.99337	1.00314	1.02455	1.01929	1.00331	0.986536	0.990933	0.987678	0.994509	0.991974	0.991974	0.990325	0.999253	0.996145	0.998888	1.00405	1.00813	1.00709			12.3	1.00246	1.00789	0.99949	0.99565	1.00008	1.00248	0.992913	1.01408	0.991244	1.00133	1.00182	0.999413	1.00367	1.00084	0.990225	1.01298	1.00671	1.01014	1.01332
	12.4	0.999999	0.994468	1.00107	1.0276	1.02046	1.00086	0.991828	0.99315	0.992971	0.997099	0.98835	0.98835	0.98924	0.99303	0.997193	1.00334	1.0062	1.01014	1.00464			12.4	1.00329	1.00665	0.997171	0.996858	1.00008	1.00478	0.987341	1.02333	0.989479	0.998735	0.998753	0.996375	1.00571	1.00456	0.987044	1.01852	1.00783	1.01854	1.01748
	12.5	0.999244	0.997761	1.00211	1.02252	1.01929	1.00086	0.982302	0.988716	0.992971	0.997099	0.991068	0.991068	0.993579	0.997475	0.997193	0.993326	1.00405	1.00914	1.00586			12.5	1.00276	1.00293	1.00065	0.998067	1.00146	1.01052	0.989569	1.01324	0.989479	0.999602	0.999775	0.997388	1.00674	1.00456	0.985984	1.01298	1.00671	1.01667	1.01332
	12.6	0.99856	0.994468	0.999008	1.02557	1.02046	0.999632	0.982302	0.992042	0.994029	0.994509	0.989256	0.989256	0.988155	0.991252	1.00034	0.997775	1.00405	1.00613	1.00586			12.6	1.00149	1.00665	1.00297	0.999275	1.00422	1.00593	0.991798	0.994736	0.980652	1.00047	0.995686	0.995362	1.00059	0.999907	0.990225	1.01667	1.00783	1.01947	1.01436
	12.7	0.998519	0.994468	1.00417	1.02455	1.01812	0.999632	0.979126	0.984283	1.00462	0.997963	0.98835	0.98835	0.991409	0.988585	0.999288	0.996663	0.999764	1.00813	1.00586			12.7	1.00228	1.00665	0.99949	0.998067	1.00146	1.00937	0.990684	1.00062	0.981534	1.00653	0.998753	0.996375	0.998546	1.00084	0.990225	1.01482	1.0112	1.01947	1.01644
	12.8	0.99902	0.992273	0.997975	1.02354	1.01695	1.00086	0.986536	0.992042	1.00462	0.997963	0.98835	0.98835	0.992494	0.988585	0.99824	0.997775	1.00405	1.00713	1.00464			12.8	1.00228	1.00541	0.99949	0.998067	1.00008	1.00593	1.00071	1.00314	0.985948	0.997869	0.997731	0.9984	1.00571	0.998045	0.993406	1.0139	1.00559	1.02134	1.01021
	12.9	1.00087	0.996663	1.00314	1.0276	1.01929	1.00086	0.98336	0.989825	0.999322	0.999689	0.993785	0.993785	0.993579	0.992141	1.00348	1	1.00513	1.00813	1.00586			12.9	1.00077	1.00417	0.997171	0.996858	1.00008	1.00363	0.998484	0.994736	0.980652	1.00047	0.998753	0.995362	0.994449	1.00084	0.994466	1.00836	1.00783	1.02321	1.01436
	13	0.999273	0.99337	1.00004	1.02557	1.01812	1.00331	0.989711	0.994258	0.995088	0.996236	0.986538	0.986538	0.990325	0.994808	0.99824	0.995551	1.00298	1.00914	1.00709			13	1.0021	1.00541	0.997171	0.998067	1.00146	1.00248	0.99737	1.00062	0.980652	0.997003	1.00284	1.00144	1.00674	0.998976	0.997646	1.0176	1.00447	1.01761	1.01021
	13.1	0.999291	0.99337	1.00417	1.0276	1.0228	1.00208	0.987594	0.995367	0.994029	0.993646	0.986538	0.986538	0.98707	0.99303	0.995098	0.996663	1.0062	1.00713	1.00832			13.1	1.0008	1.00169	0.994852	1.00048	1.00422	1.00018	0.994027	1.00819	0.981534	1.00307	1.00284	0.99435	0.997522	0.992459	0.990225	1.00928	1.00783	1.02041	1.01125
	13.2	0.998374	0.992273	0.997975	1.03166	1.02046	1.00208	0.986536	0.989825	0.995088	0.993646	0.990162	0.990162	0.991409	0.994808	0.995098	0.988877	0.998691	1.00613	1.00586			13.2	1.00107	1.00417	0.997171	1.00048	1.00146	0.997887	0.995141	1.00062	0.978004	1.0048	1.00284	1.00144	1.00367	0.996183	0.993406	1.01113	1.00671	1.01294	1.01125
	13.3	0.999766	0.997761	1.00727	1.02861	1.0228	1.00331	0.98336	0.992042	0.999322	0.996236	0.989256	0.989256	0.982732	0.993919	1.00138	1.00334	1.00191	1.0011	1.00218			13.3	1.00051	1.00417	0.992533	1.00048	1.00146	1.00018	0.992913	1.00314	0.989479	0.999602	0.999775	0.999413	0.99957	0.991528	0.990225	1.0102	1.00334	1.01574	1.0154
	13.4	1.00007	0.994468	1.00314	1.03065	1.02046	1.00208	0.984419	0.990933	1.0025	1.00055	0.98835	0.98835	0.984901	0.994808	0.999288	0.995551	1.00405	1.01215	1.00464			13.4	1.00014	1.00293	0.996011	1.0029	1.00422	0.99559	0.995141	0.990532	0.97359	0.997869	1.00182	0.996375	1.00264	0.996183	0.992345	1.0139	1.00559	1.01947	1.0154
	13.5	0.999225	0.997761	1.00624	1.02963	1.01929	1.00453	0.985477	0.987608	1.00144	0.997963	0.98835	0.98835	0.98707	0.994808	1.00034	0.992214	0.998691	1.00412	1.00218			13.5	0.999965	1.00541	0.997171	0.998067	1.00146	0.996739	0.994027	1.00651	0.980652	0.997003	0.998753	0.992325	0.997522	0.994321	0.994466	1.01113	1.00559	1.01387	1.01436
	13.6	0.997876	0.996663	1.00727	1.03166	1.01577	0.999632	0.979126	0.982066	0.994029	0.992783	0.987444	0.987444	0.984901	0.993919	0.995098	0.992214	1.00084	1.01014	1.01077			13.6	1.00058	1.00665	0.991373	0.999275	1.00008	0.99559	0.992913	1.01155	0.981534	0.994404	1.00386	0.996375	1.00674	0.994321	0.991285	1.01205	1.00559	1.01761	1.00917
	13.7	0.997667	0.994468	1.00314	1.0276	1.01695	0.998407	0.982302	0.983174	0.991912	0.997963	0.985632	0.985632	0.984901	0.994808	1.00243	0.996663	1.00405	1.00211	1.00586			13.7	1.00171	1.00169	0.992533	0.998067	1.00146	0.997887	1.00071	1.00735	0.985065	0.998735	1.0008	0.9984	1.00776	0.998976	0.989165	1.0102	1.01008	1.01761	1.01436
	13.8	0.998546	0.99337	1.00107	1.0276	1.01812	1.00331	0.98336	0.988716	0.996147	0.996236	0.991068	0.991068	0.990325	1.00014	0.995098	0.998888	0.995473	1.00412	0.99973			13.8	1.00016	1.00417	0.99949	0.999275	0.997328	1.00018	0.996256	1.00819	0.982417	0.992672	1.00182	0.993337	0.996497	0.997114	0.987044	1.00743	1.00559	1.01667	1.01748
	13.9	0.998793	0.99337	1.00211	1.03166	1.01812	1.00086	0.987594	0.988716	0.992971	0.991056	0.98382	0.98382	0.98707	0.996586	1.00453	0.998888	1.00513	1.00613	1.00586			13.9	1.00072	1.00665	0.996011	1.00048	1.00008	1.00018	0.998484	1.01492	0.980652	0.989207	0.999775	0.992325	0.991377	0.998045	0.993406	1.01298	1.00671	1.01947	1.01228
	14	0.998617	0.995566	1.00004	1.02861	1.01812	1.00331	0.986536	0.989825	0.997205	0.995373	0.986538	0.986538	0.98924	0.994808	0.997193	1.00222	0.998691	1.00311	1.00218			14	1.00068	1.00293	0.99833	1.00169	1.00284	1.00478	0.995141	1.00146	0.980652	0.998735	0.995686	0.997388	0.997522	0.995252	0.990225	1.01113	1.00671	1.01947	1.01228
	14.1	0.999057	0.99337	0.997975	1.02658	1.02046	1.00453	0.988653	0.987608	0.990854	0.990193	0.987444	0.987444	0.990325	0.998364	1.00034	1.00111	0.999764	1.01215	1.00586			14.1	1.0001	1.00665	0.994852	0.99565	0.997328	0.999035	0.99737	1.00567	0.984182	0.996137	0.997731	0.993337	0.994449	0.998045	0.988105	1.01482	1.00671	1.02041	1.01125
	14.2	0.997974	0.994468	1.00314	1.03065	1.01812	1.00453	0.985477	0.987608	0.995088	0.994509	0.982009	0.982009	0.991409	0.993919	0.996145	0.994438	0.998691	1.00914	1.00218			14.2	0.999668	1.00045	0.99949	0.999275	1.00284	1.00018	0.992913	1.00651	0.978886	0.998735	1.00182	0.996375	0.996497	0.990597	0.987044	1.01298	1.00671	1.01667	1.00605
	14.3	0.997867	0.99337	1.00107	1.03471	1.02046	1.00208	0.987594	0.990933	0.988736	0.98933	0.986538	0.986538	0.993579	0.997475	0.991955	0.998888	1.00298	0.998092	0.997277			14.3	1.00115	1.00541	0.997171	0.998067	1.00008	1.00018	0.996256	1.01828	0.981534	0.999602	0.998753	0.992325	0.991377	0.996183	0.985984	1.0139	1.01008	1.02228	1.01332
	14.4	0.998314	0.996663	1.00211	1.03268	1.01929	1.00086	0.985477	0.989825	0.997205	0.995373	0.985632	0.985632	0.98924	0.990363	0.996145	0.997775	0.999764	1.00713	0.998503			14.4	1.00204	1.00417	1.00413	0.99565	0.998705	1.00248	0.995141	1.01071	0.982417	1.00047	1.00284	0.997388	1.00059	0.998045	0.984924	1.01298	1.00559	1.02508	1.0154
	14.5	0.996761	0.994468	1.00004	1.02963	1.01812	1.00208	0.982302	0.987608	0.992971	0.991056	0.984726	0.984726	0.992494	0.99303	0.995098	0.993326	0.997619	1.00512	0.997277			14.5	1.00042	1.00665	0.997171	0.996858	1.00008	1.00248	0.996256	1.01071	0.9833	0.999602	1.0008	0.993337	0.994449	0.991528	0.981743	1.01298	1.00896	1.01947	1.01125
	14.6	0.997324	0.992273	1.00004	1.03166	1.01929	1.00208	0.98336	0.985391	0.995088	0.994509	0.987444	0.987444	0.992494	0.988585	0.996145	0.991101	0.997619	1.00512	1.00218			14.6	1.00137	1.00293	1.00181	1.00048	1.00146	0.997887	0.994027	1.00903	0.985948	1.00047	1.00182	0.986249	0.991377	0.998045	0.983864	1.02314	1.00783	1.02601	1.01228
	14.7	0.998407	0.995566	1.00107	1.03471	1.02046	1.00208	0.985477	0.990933	0.994029	0.994509	0.986538	0.986538	0.994663	0.997475	0.99824	0.986652	0.999764	1.00412	0.998503			14.7	1.00022	1.00417	1.00297	0.999275	1.00146	0.997887	0.990684	1.00483	0.982417	0.996137	0.998753	0.992325	0.993425	0.994321	0.982804	1.01482	1.01232	1.02414	1.01125
	14.8	0.996921	0.992273	1.00314	1.03572	1.01812	0.999632	0.982302	0.986499	0.994029	0.997099	0.985632	0.985632	0.985986	0.995697	0.995098	0.992214	0.993328	1.00613	0.99605			14.8	0.998597	1.00541	0.99949	0.998067	1.00008	0.994442	0.989569	1.01071	0.977121	1.00393	1.0008	0.989287	0.993425	0.989666	0.982804	1.01205	1.00671	1.01201	1.00917
	14.9	0.995191	0.992273	0.996942	1.03369	1.01695	1.00208	0.98336	0.986499	0.988736	0.98933	0.982009	0.982009	0.98924	0.990363	0.996145	0.993326	0.993328	1.0011	0.99605			14.9	1.00007	1.00417	0.99949	0.998067	1.00146	0.992146	0.988455	1.00651	0.985948	1.00393	1.00182	0.993337	0.992401	0.991528	0.988105	1.01205	1.00896	1.01947	1.01332
	15	0.996223	0.996663	1.00211	1.03369	1.01812	1.00086	0.98336	0.987608	0.985561	0.988466	0.987444	0.987444	0.985986	0.992141	0.99405	0.985539	0.993328	1.01115	0.998503			15	0.998243	1.00417	0.99833	0.996858	1.00008	1.00018	0.983997	1.00483	0.980652	1.00133	0.997731	0.9903	0.991377	0.99339	0.982804	1.01482	1.00447	1.01387	1.00917
	15.1	0.997386	0.994468	0.999008	1.03369	1.01812	1.00086	0.981243	0.990933	0.994029	0.992783	0.984726	0.984726	0.991409	0.99303	0.99405	0.987764	0.996546	1.01215	1.00341			15.1	1.00069	1.00417	0.99833	0.996858	0.998705	1.00133	0.988455	1.01239	0.979769	0.994404	1.00386	0.991312	0.991377	0.994321	0.991285	1.01945	1.00783	1.02321	1.0154
	15.2	0.99692	0.998858	1.00314	1.03471	1.01695	1.00208	0.982302	0.988716	0.997205	0.990193	0.982915	0.982915	0.994663	0.992141	0.996145	0.989989	0.992255	1.00211	0.997277			15.2	1.00033	1.00541	0.996011	0.999275	1.00008	1.00133	0.985112	1.00314	0.977121	1.00047	1.00284	0.989287	0.990353	1.00177	0.992345	1.01945	1.00896	1.01761	1.0154
	15.3	0.996931	0.999956	1.00107	1.03572	1.01929	1.00208	0.985477	0.989825	0.991912	0.992783	0.982009	0.982009	0.985986	0.993919	0.995098	0.986652	0.993328	1.00914	0.998503			15.3	1.00126	1.00665	0.996011	1.00169	1.00146	1.00248	0.987341	1.01155	0.981534	0.991806	1.0008	0.993337	0.992401	1.00177	0.993406	1.01945	1.00896	1.01761	1.01436
	15.4	0.995509	0.997761	1.00004	1.03065	1.02046	1.00331	0.980185	0.985391	0.992971	0.993646	0.982915	0.982915	0.988155	0.990363	0.991955	0.982202	0.991182	1.00412	1.00096			15.4	1.0004	1.00541	0.994852	1.00048	1.00146	1.00133	0.983997	1.00819	0.980652	0.995271	1.00284	0.9903	0.992401	0.998045	0.995526	1.01852	1.00671	1.01481	1.01644
	15.5	0.995933	0.995566	0.996942	1.03572	1.01577	1.00086	0.984419	0.99315	0.992971	0.988466	0.985632	0.985632	0.991409	0.995697	0.990908	0.979978	0.989037	1.00613	0.998503			15.5	0.999697	1.00293	0.992533	0.996858	1.00008	1.00593	0.986226	1.0023	0.982417	0.994404	1.00182	0.997388	0.994449	0.995252	0.993406	1.01482	1.00559	1.01481	1.01332
	15.6	0.996153	0.996663	1.00004	1.03369	1.01695	1.00576	0.977009	0.982066	0.992971	0.997963	0.984726	0.984726	0.98707	0.992141	0.99824	0.984427	0.995473	1.0011	0.99973			15.6	0.99953	1.00417	0.994852	0.998067	1.00284	1.00593	0.985112	1.01324	0.977121	0.990073	1.00284	0.993337	0.993425	0.986873	0.984924	1.01482	1.01008	1.01947	1.01436
	15.7	0.995278	0.99337	0.999008	1.03674	1.02163	1.00208	0.980185	0.984283	0.994029	0.992783	0.985632	0.985632	0.984901	0.989474	0.988813	0.984427	0.991182	1.0011	0.99973			15.7	1.00047	1.00541	0.992533	1.00048	1.00284	1.00822	0.988455	1.01408	0.985948	0.997869	1.0008	0.997388	0.994449	0.99339	0.988105	1.01482	1.00559	1.01107	1.00709
	15.8	0.994759	0.994468	0.996942	1.03268	1.01812	1.00208	0.98336	0.99315	0.991912	0.991056	0.982915	0.982915	0.984901	0.996586	0.984623	0.978865	0.989037	1.0011	1.00096			15.8	0.998213	1.00417	0.991373	0.999275	1.00284	1.00363	0.990684	1.00819	0.978004	0.998735	1.00386	0.991312	0.984208	0.990597	0.981743	1.00743	1.00896	1.01574	1.00709
	15.9	0.995673	0.994468	0.999008	1.03471	1.01577	1.00208	0.980185	0.990933	0.995088	0.990193	0.986538	0.986538	0.98707	0.996586	0.98986	0.984427	0.985819	1.00311	0.99973			15.9	0.998204	1.00293	0.987895	1.00048	1.00422	1.00018	0.989569	0.999781	0.978004	0.997869	1.00182	0.988274	0.988304	0.989666	0.980683	1.01482	1.0112	1.01761	1.01436
	16	0.996474	0.994468	0.999008	1.03369	1.0146	1.00576	0.981243	0.986499	0.992971	0.990193	0.989256	0.989256	0.98707	0.991252	0.990908	0.989989	0.989037	1.00914	1.00218			16	0.999039	1.00169	0.990214	0.998067	1.00284	1.00478	0.987341	1.00651	0.979769	0.994404	1.00386	0.989287	0.98728	0.996183	0.984924	1.0139	1.00896	1.02041	1.01228
	16.1	0.995422	0.99337	0.996942	1.03572	1.01929	1.00208	0.980185	0.989825	0.991912	0.993646	0.985632	0.985632	0.983816	0.99303	0.988813	0.987764	0.99011	1.0001	0.99973			16.1	0.998143	1.00045	0.990214	1.00048	1.00284	1.00018	0.989569	1.00819	0.978886	0.999602	0.998753	0.985237	0.988304	0.99339	0.984924	1.00558	1.01008	1.01761	1.01228
	16.2	0.994516	0.992273	0.995909	1.03471	1.0146	1.00208	0.980185	0.990933	0.987678	0.987603	0.987444	0.987444	0.984901	0.990363	0.991955	0.988877	0.987964	0.999096	0.997277			16.2	0.998313	1.00169	0.989054	0.998067	1.00422	1.00593	0.985112	1.00483	0.975356	0.999602	1.00284	0.991312	0.993425	0.990597	0.984924	1.0139	1.00783	1.01387	1.00709
	16.3	0.995758	0.992273	0.994876	1.03775	1.01577	1.00331	0.98336	0.989825	0.994029	0.98933	0.990162	0.990162	0.985986	0.986807	0.99405	0.985539	0.986892	1.0001	1.00341			16.3	0.998651	1.00169	0.990214	0.996858	1.00146	1.00593	0.989569	1.00651	0.979769	0.997869	0.997731	0.991312	0.989328	0.99339	0.983864	1.0102	1.01232	1.01854	1.00917
	16.4	0.995984	0.987882	0.987644	1.03978	1.01577	1.00453	0.98336	0.992042	0.986619	0.985013	0.991068	0.991068	0.98924	0.991252	0.996145	0.993326	0.986892	1.00512	1.00096			16.4	1.00053	1.00045	0.996011	0.998067	1.00146	1.00707	0.991798	1.0166	0.978004	0.997003	1.00386	0.9903	0.992401	0.998045	0.987044	1.01298	1.00783	1.02041	1.01021
	16.5	0.996851	0.98898	0.988677	1.03877	1.0146	1.00453	0.988653	0.995367	0.988736	0.983287	0.993785	0.993785	0.988155	0.99303	0.997193	0.989989	0.989037	1.00211	1.00464			16.5	1.00017	1.00417	0.993692	0.996858	1.00284	1.00478	0.991798	1.01071	0.980652	0.995271	1.0008	0.996375	0.990353	0.994321	0.989165	1.01205	1.00671	1.02134	1.01125
	16.6	0.996819	0.984589	0.985578	1.03572	1.0146	1.00331	0.986536	0.99315	0.996147	0.988466	0.991974	0.991974	0.993579	0.994808	0.995098	0.986652	0.992255	1.00613	1.00218			16.6	0.99938	0.999206	0.993692	0.999275	1.00422	1.00593	0.988455	1.00567	0.982417	1.0074	0.998753	0.988274	0.986256	0.997114	0.989165	1.00836	1.01008	1.01854	1.00605
	16.7	0.993033	0.986784	0.986611	1.03471	1.01343	1.00453	0.982302	0.986499	0.989795	0.987603	0.985632	0.985632	0.981647	0.985918	0.996145	0.989989	0.986892	0.998092	0.99237			16.7	0.999682	0.999206	0.987895	0.99565	1.00146	1.00478	0.992913	1.00987	0.977121	1.00826	0.999775	0.991312	0.991377	1.00177	0.992345	1.0139	1.00671	1.01387	1.00605
	16.8	0.994363	0.991175	0.98971	1.03674	1.01695	1.00331	0.980185	0.984283	0.982385	0.98674	0.991974	0.991974	0.983816	0.986807	0.996145	0.985539	0.987964	1.00311	0.99973			16.8	0.998628	0.994241	0.989054	0.99565	1.00146	1.00363	0.994027	1.01324	0.980652	0.999602	1.00182	0.988274	0.990353	0.99339	0.984924	1.0102	1.00896	1.01667	1.00917
	16.9	0.994215	0.987882	0.986611	1.03471	1.01577	1.00086	0.980185	0.983174	0.994029	0.98933	0.991974	0.991974	0.985986	0.986807	0.98986	0.987764	0.986892	1.0011	1.00096			16.9	0.998808	0.995482	0.997171	0.998067	1.00284	1.00937	0.992913	1.0023	0.980652	1.00047	0.993642	0.984224	0.984208	0.999907	0.984924	1.0139	1.01232	1.01387	1.01228
	17	0.996021	0.992273	0.993843	1.03166	1.01109	1.00821	0.985477	0.989825	0.992971	0.996236	0.991068	0.991068	0.984901	0.986807	0.995098	0.985539	0.992255	0.999096	1.00096			17	1.00027	1.00665	0.996011	0.99565	1.00146	1.01052	0.998484	1.01324	0.977121	1.00653	0.996708	0.992325	0.98728	0.992459	0.983864	1.01482	1.00783	1.01481	1.00917
	17.1	0.994982	0.992273	0.991777	1.03471	1.01929	1.00821	0.98336	0.984283	0.987678	0.988466	0.98835	0.98835	0.985986	0.986807	0.993003	0.98109	0.987964	1.00713	1.00096			17.1	0.999929	1.00169	0.994852	1.00048	1.00422	1.00363	0.996256	0.999781	0.969177	1.00307	1.0008	0.99435	0.990353	1.00177	0.984924	1.01482	1.00783	1.01947	1.01125
	17.2	0.995828	0.991175	0.991777	1.03674	1.02163	0.998407	0.985477	0.99315	0.991912	0.990193	0.991974	0.991974	0.98924	0.991252	0.987766	0.979978	0.984746	1.00412	1.00341			17.2	0.99714	1.00169	0.992533	0.99565	1.00008	1.00363	0.998484	0.998941	0.974473	0.991806	0.998753	0.985237	0.985232	0.996183	0.979623	1.01667	1.00671	1.01574	1.00709
	17.3	0.994461	0.987882	0.99281	1.02963	1.01343	0.995957	0.981243	0.989825	0.994029	0.987603	0.991068	0.991068	0.985986	0.991252	0.993003	0.984427	0.992255	0.999096	0.99973			17.3	0.998733	1.00045	0.994852	0.998067	1.00146	1.00593	0.990684	1.00567	0.972708	0.996137	1.0008	0.993337	0.991377	1.0027	0.977503	1.01667	1.01008	1.01481	1.00397
	17.4	0.9955	0.987882	0.991777	1.03065	1.01226	0.997182	0.98336	0.989825	0.986619	0.991056	0.994691	0.994691	0.993579	0.989474	0.991955	0.982202	0.992255	1.00613	1.00341			17.4	0.999023	1.00293	0.997171	1.00048	1.00422	1.00363	0.992913	1.01576	0.979769	0.995271	0.993642	0.984224	0.982159	0.999907	0.979623	1.01667	1.01008	1.01481	1.00917
	17.5	0.994738	0.985687	0.987644	1.02963	1.01695	0.994732	0.982302	0.987608	0.988736	0.985877	0.994691	0.994691	0.98924	0.994808	0.99405	0.983315	0.992255	1.00211	1.00096			17.5	0.99775	0.999206	0.991373	0.998067	1.00146	1.00478	0.989569	1.01492	0.978886	0.993538	0.997731	0.981186	0.982159	0.998976	0.983864	1.01575	1.00896	1.01201	1.00709
	17.6	0.994809	0.990077	0.991777	1.02658	1.01109	0.997182	0.985477	0.989825	0.990854	0.993646	0.987444	0.987444	0.982732	0.992141	0.993003	0.985539	0.987964	1.00914	1.00464			17.6	0.997482	0.999206	0.990214	0.996858	0.998705	1.00478	0.989569	1.01324	0.977121	0.997003	0.999775	0.989287	0.985232	1.00363	0.978563	1.01575	1.00559	1.00827	1.00189
	17.7	0.994831	0.98898	0.994876	1.02658	1.0146	0.994732	0.985477	0.986499	0.989795	0.987603	0.990162	0.990162	0.988155	0.995697	0.988813	0.988877	0.987964	1.00211	1.00586			17.7	0.996787	0.995482	0.993692	0.998067	0.998705	1.00478	0.989569	1.00567	0.977121	1.00653	0.997731	0.984224	0.988304	0.996183	0.974322	1.00836	1.00671	1.00547	1.01125
	17.8	0.993431	0.990077	0.993843	1.02658	1.0146	0.993507	0.980185	0.983174	0.982385	0.985877	0.99288	0.99288	0.985986	0.992141	0.98986	0.983315	0.9944	0.999096	1.00096			17.8	0.997676	1.00169	0.992533	0.999275	1.00008	0.997887	0.991798	1.00567	0.982417	1.00307	1.0008	0.987262	0.980111	0.995252	0.975382	1.01575	1.00896	1.01107	1.00917
	17.9	0.992896	0.990077	0.988677	1.0276	1.01109	0.999632	0.979126	0.983174	0.991912	0.987603	0.986538	0.986538	0.983816	0.987696	0.99405	0.986652	0.986892	1.0001	1.00096			17.9	0.998754	1.00293	0.994852	1.0029	1.00422	1.00478	0.985112	1.01155	0.978886	1.00566	0.998753	0.986249	0.980111	0.997114	0.983864	1.01852	1.00671	1.00827	1.00709
	18	0.993711	0.985687	0.988677	1.02963	1.0146	0.998407	0.982302	0.984283	0.992971	0.985013	0.991974	0.991974	0.988155	0.98414	0.99405	0.985539	0.986892	0.999096	1.00341			18	0.998787	1.00541	0.989054	0.999275	1.00284	1.00133	0.992913	1.00903	0.980652	1.0074	1.0008	0.989287	0.983183	0.994321	0.980683	1.01852	1.01008	1.00734	1.00605
	18.1	0.993685	0.987882	0.991777	1.03065	1.01695	0.994732	0.982302	0.987608	0.994029	0.988466	0.984726	0.984726	0.988155	0.985918	0.995098	0.983315	0.991182	0.999096	0.99973			18.1	0.998498	0.996723	0.994852	0.99565	0.997328	1.00822	0.990684	0.997259	0.978886	0.999602	1.00795	0.991312	0.98728	0.990597	0.984924	1.02129	1.0112	1.01107	1.00813
	18.2	0.993296	0.985687	0.991777	1.0276	1.0146	0.998407	0.982302	0.985391	0.995088	0.98415	0.98835	0.98835	0.990325	0.989474	0.993003	0.984427	0.989037	0.994076	0.997277			18.2	0.998028	0.999206	0.997171	0.99565	0.99595	1.00707	0.994027	1.00399	0.979769	1.0048	0.999775	0.987262	0.985232	0.992459	0.979623	1.02037	1.00783	1.00827	1.00605
	18.3	0.994102	0.991175	0.99281	1.03166	1.01343	0.997182	0.985477	0.989825	0.991912	0.983287	0.989256	0.989256	0.98707	0.985029	0.991955	0.983315	0.983673	1.00412	1.00341			18.3	0.997415	1.00045	0.993692	0.998067	1.00008	1.00707	0.994027	1.00314	0.972708	1.0022	1.0008	0.987262	0.98728	0.994321	0.978563	1.01298	1.00671	1.01014	1.00397
	18.4	0.994512	0.987882	0.99281	1.02861	1.00992	0.997182	0.984419	0.987608	0.997205	0.993646	0.987444	0.987444	0.993579	0.986807	0.990908	0.978865	0.986892	1.00412	1.00586			18.4	0.997679	0.997964	0.992533	1.00048	1.00008	1.00133	0.992913	1.00314	0.974473	1.00133	1.00693	0.988274	0.985232	0.995252	0.979623	1.01482	1.00671	1.01107	1.00605
	18.5	0.994716	0.99337	0.995909	1.03369	1.01812	0.995957	0.98336	0.989825	0.986619	0.98933	0.98382	0.98382	0.988155	0.985029	0.991955	0.984427	0.991182	1.00813	1.00218			18.5	0.998079	0.996723	0.990214	1.00169	1.00146	1.00018	0.990684	1.00651	0.978886	1.00826	1.00489	0.987262	0.988304	0.996183	0.979623	1.01667	1.00896	1.01014	0.998774
	18.6	0.993924	0.987882	0.995909	1.02963	1.01695	0.997182	0.980185	0.985391	0.991912	0.995373	0.98382	0.98382	0.990325	0.983251	0.995098	0.986652	0.99011	1.0011	0.99605			18.6	0.998592	0.996723	0.990214	0.999275	1.00008	1.00133	0.991798	1.00651	0.978886	0.996137	1.00693	0.992325	0.992401	0.991528	0.981743	1.02037	1.01232	1.01107	1.00501
	18.7	0.993092	0.986784	0.993843	1.03166	1.01577	0.995957	0.985477	0.994258	0.989795	0.991056	0.979291	0.979291	0.988155	0.988585	0.98986	0.979978	0.982601	1.0011	1.00218			18.7	0.999577	0.996723	0.989054	0.999275	0.998705	1.00133	0.994027	1.00903	0.978886	1.0048	1.00284	0.9903	0.98728	0.996183	0.984924	1.02129	1.01906	1.01574	1.00293
	18.8	0.993667	0.986784	0.995909	1.02557	1.01577	0.998407	0.986536	0.988716	0.989795	0.985013	0.982915	0.982915	0.98707	0.986807	0.993003	0.986652	0.982601	1.00813	1.00341			18.8	0.998186	0.995482	0.989054	1.00048	1.00008	0.99559	0.989569	1.00735	0.978886	1.00913	1.00182	0.988274	0.988304	0.998045	0.982804	1.01945	1.0112	1.01201	0.999813
	18.9	0.993959	0.985687	0.99281	1.03166	1.01812	0.997182	0.980185	0.987608	0.985561	0.985877	0.982915	0.982915	0.990325	0.99303	0.990908	0.987764	0.987964	1.00613	1.00464			18.9	0.997803	0.994241	0.991373	0.996858	0.998705	0.996739	0.994027	1.01071	0.978004	1.00307	1.00489	0.986249	0.991377	0.992459	0.980683	1.0139	1.0112	1.01201	1.00397
	19	0.993919	0.98898	0.995909	1.02861	1.01577	0.999632	0.987594	0.990933	0.988736	0.985877	0.981103	0.981103	0.991409	0.991252	0.990908	0.983315	0.986892	0.999096	1.00341			19	0.99704	0.997964	0.993692	0.996858	0.998705	0.99559	0.995141	1.00399	0.976238	1.0022	1.00489	0.988274	0.985232	0.990597	0.982804	1.01113	1.01232	1.00921	1.00189
	19.1	0.993293	0.990077	0.996942	1.02658	1.01577	0.999632	0.986536	0.987608	0.996147	0.992783	0.979291	0.979291	0.988155	0.985918	0.990908	0.982202	0.982601	0.999096	0.99973			19.1	1.00098	0.997964	0.993692	1.00048	1.00146	1.00822	0.986226	1.01155	0.981534	1.00653	1.00386	0.9903	0.991377	0.994321	0.990225	1.01667	1.01569	1.01947	1.00813
	19.2	0.991374	0.987882	0.993843	1.02861	1.01695	0.995957	0.986536	0.987608	0.984502	0.98156	0.978385	0.978385	0.982732	0.979695	0.987766	0.98109	0.980455	1.00813	1.00464			19.2	0.999511	1.00045	0.989054	1.00169	1.00008	1.00018	0.992913	1.01239	0.981534	1.0074	1.00693	0.992325	0.98728	0.985942	0.984924	1.01298	1.01345	1.01667	1.00501
	19.3	0.992974	0.986784	0.993843	1.02557	1.01577	0.997182	0.987594	0.992042	0.987678	0.98415	0.98382	0.98382	0.992494	0.985029	0.98986	0.983315	0.984746	1.0001	0.99973			19.3	0.99972	0.996723	0.991373	0.996858	0.997328	0.997887	0.987341	1.01324	0.980652	1.00307	1.00795	0.989287	0.992401	0.991528	0.989165	1.01575	1.01681	1.01947	1.00813
	19.4	0.992165	0.98898	0.993843	1.02658	1.01343	0.998407	0.986536	0.989825	0.989795	0.98674	0.982915	0.982915	0.98924	0.983251	0.986718	0.976641	0.981528	1.00311	0.998503			19.4	0.999885	1.00045	0.989054	0.998067	0.997328	0.99559	0.990684	1.01239	0.980652	1.0022	1.00591	0.9903	0.989328	0.997114	0.983864	1.01482	1.01906	1.02508	1.00605
	19.5	0.994329	0.991175	0.999008	1.03166	1.0146	0.998407	0.987594	0.986499	0.990854	0.994509	0.987444	0.987444	0.991409	0.987696	0.990908	0.977753	0.980455	0.997088	1.00341			19.5	0.998644	1.00169	0.986735	0.996858	1.00008	0.996739	0.986226	1.00987	0.978004	1.00393	1.00182	0.9903	0.991377	0.997114	0.979623	1.01113	1.01681	1.02228	1.00501
	19.6	0.994452	0.990077	0.995909	1.03065	1.01577	1.00086	0.986536	0.987608	0.987678	0.98674	0.987444	0.987444	0.988155	0.985029	0.995098	0.982202	0.984746	1.0011	1.00709			19.6	0.998076	1.00045	0.987895	0.998067	1.00284	0.999035	0.985112	1.00483	0.974473	1.00826	1.00489	0.983211	0.98728	0.994321	0.978563	1.01113	1.01681	1.02321	1.00501
	19.7	0.993216	0.986784	0.994876	1.03268	1.01577	0.998407	0.986536	0.994258	0.987678	0.98933	0.985632	0.985632	0.982732	0.987696	0.987766	0.982202	0.981528	1.0011	0.997277			19.7	0.997587	0.996723	0.987895	0.994442	1.00146	0.994442	0.985112	1.01828	0.9833	1.00133	1.00591	0.987262	0.989328	0.991528	0.975382	1.0102	1.01457	1.01854	1.00085
	19.8	0.993224	0.987882	0.994876	1.02861	1.01812	0.997182	0.98336	0.988716	0.988736	0.98674	0.986538	0.986538	0.98924	0.985918	0.991955	0.978865	0.980455	1.00211	1.00218			19.8	0.997679	1.00045	0.989054	0.998067	0.997328	0.99559	0.988455	1.01576	0.975356	1.0022	1.00386	0.986249	0.986256	0.99339	0.981743	1.0102	1.01569	1.01667	1.00189
	19.9	0.994198	0.990077	0.994876	1.02963	1.0146	0.998407	0.98336	0.992042	0.986619	0.993646	0.98382	0.98382	0.991409	0.991252	0.996145	0.982202	0.982601	1.0001	1.00096			19.9	0.999422	1.00045	0.987895	1.00048	1.00146	0.990997	0.989569	1.01744	0.985948	1.00393	1.00284	0.9903	0.988304	0.996183	0.980683	1.01667	1.01569	1.01574	1.00501
	20	0.995316	0.987882	0.994876	1.03166	1.01343	0.998407	0.988653	0.994258	0.991912	0.99192	0.991068	0.991068	0.988155	0.990363	0.99405	0.976641	0.985819	1.00211	1.00341			20	0.999506	0.997964	0.986735	0.998067	0.997328	0.994442	0.987341	1.02164	0.985948	1.00133	1.01	0.987262	0.988304	1.00177	0.980683	1.01205	1.01793	1.02041	1.00189
	20.1	0.993077	0.982394	0.98971	1.03065	1.01577	0.995957	0.988653	0.994258	0.986619	0.988466	0.98382	0.98382	0.993579	0.985918	0.993003	0.979978	0.984746	0.997088	1.00096			20.1	0.998026	0.997964	0.986735	0.996858	1.00008	0.997887	0.983997	1.01324	0.980652	0.998735	1.00489	0.979161	0.982159	0.999907	0.979623	1.0139	1.01569	1.02694	1.00605
	20.2	0.993956	0.986784	0.995909	1.02963	1.01343	1.00086	0.984419	0.988716	0.986619	0.994509	0.982009	0.982009	0.98924	0.98414	0.996145	0.985539	0.987964	1.0011	1.00218			20.2	0.999504	1.00045	0.984416	0.994442	0.997328	0.996739	0.989569	1.02248	0.9833	0.991806	1.00489	0.983211	0.989328	1.00456	0.981743	1.01852	1.02018	1.02414	1.00397
	20.3	0.995112	0.986784	0.991777	1.03471	1.01226	0.995957	0.988653	0.99315	0.982385	0.988466	0.991068	0.991068	0.992494	0.989474	0.997193	0.987764	0.984746	1.00311	1.00096			20.3	0.999791	0.997964	0.987895	0.99565	0.998705	0.996739	0.989569	1.02333	0.977121	1.00047	1.00898	0.991312	0.995473	0.995252	0.979623	1.01575	1.01793	1.01947	1.00501
	20.4	0.994197	0.986784	0.99281	1.02963	1.01109	1.00086	0.985477	0.992042	0.985561	0.988466	0.98835	0.98835	0.993579	0.987696	0.996145	0.978865	0.986892	0.997088	1.00586			20.4	0.99955	0.997964	0.989054	0.99565	1.00008	0.999035	0.992913	1.02333	0.978886	0.999602	1.00898	0.986249	0.985232	0.997114	0.981743	1.01205	1.01569	1.02228	1.00605
	20.5	0.993342	0.987882	0.996942	1.03471	1.01226	0.993507	0.982302	0.988716	0.983443	0.983287	0.986538	0.986538	0.993579	0.990363	0.99405	0.98109	0.983673	0.999096	1.00218			20.5	0.998091	0.999206	0.991373	0.992025	0.998705	1.00248	0.990684	1.02164	0.982417	1.00133	1.00591	0.978149	0.978063	0.995252	0.975382	1.01298	1.01681	1.02134	1.00189
	20.6	0.993375	0.987882	0.993843	1.0276	1.00758	0.999632	0.98336	0.99315	0.986619	0.987603	0.981103	0.981103	0.98707	0.987696	0.996145	0.982202	0.987964	1.00311	1.00709			20.6	0.999165	1.00169	0.990214	0.996858	1.00008	0.997887	0.992913	1.01324	0.980652	0.999602	1.00795	0.985237	0.988304	0.997114	0.978563	1.01667	1.01569	1.02041	1.00189
	20.7	0.992958	0.987882	0.995909	1.03369	1.01226	0.994732	0.977009	0.987608	0.987678	0.990193	0.982915	0.982915	0.98707	0.989474	0.991955	0.976641	0.986892	1.0001	1.00832			20.7	0.999133	0.999206	0.991373	0.993233	0.998705	1.00018	0.994027	1.0166	0.981534	1.00307	1.00898	0.988274	0.986256	0.991528	0.980683	1.01113	1.01793	1.01667	1.00501
	20.8	0.992107	0.98898	0.994876	1.01846	1.00875	0.997182	0.979126	0.987608	0.987678	0.985013	0.990162	0.990162	0.988155	0.991252	0.987766	0.978865	0.982601	0.999096	1.00218			20.8	0.997814	1.00169	0.992533	0.992025	0.99595	0.99559	0.996256	1.01071	0.978886	1.00307	1.00386	0.981186	0.98728	0.998045	0.982804	1.01205	1.01793	1.01201	0.998774
	20.9	0.99324	0.987882	0.993843	1.02252	1.01109	1.00086	0.981243	0.992042	0.987678	0.98156	0.982915	0.982915	0.991409	0.990363	0.991955	0.978865	0.987964	1.00613	1.00709			20.9	0.999935	1.00169	0.987895	0.992025	0.99595	0.997887	0.990684	1.02585	0.9833	0.994404	1.00693	0.984224	0.992401	0.995252	0.982804	1.01482	1.02242	1.02321	1.00709
	21	0.993762	0.985687	0.988677	1.02354	1.01577	0.999632	0.979126	0.986499	0.987678	0.987603	0.986538	0.986538	0.992494	0.99303	0.997193	0.979978	0.987964	1.00512	1.00464			21	0.996015	0.997964	0.987895	0.994442	0.997328	0.999035	0.994027	1.00651	0.967412	0.992672	1.00591	0.978149	0.983183	0.989666	0.978563	1.01113	1.01793	1.02041	1.00605
	21.1	0.993644	0.986784	0.990743	1.01846	1.01109	0.995957	0.986536	0.995367	0.995088	0.991056	0.990162	0.990162	0.988155	0.99303	0.990908	0.975528	0.982601	0.998092	1.00586			21.1	0.99868	0.999206	0.986735	0.992025	0.994573	0.993294	0.994027	1.01239	0.979769	1.0022	1.00898	0.987262	0.992401	0.989666	0.981743	1.01298	1.02242	1.01947	1.00709
	21.2	0.993169	0.991175	0.995909	1.01643	1.01343	0.997182	0.984419	0.990933	0.987678	0.985877	0.991068	0.991068	0.985986	0.987696	0.99405	0.976641	0.981528	1.0001	1.00586			21.2	0.999092	0.996723	0.989054	0.992025	0.99595	0.997887	0.990684	1.01996	0.984182	0.991806	1.01	0.9903	0.996497	0.990597	0.979623	1.0139	1.01906	1.02041	1.00501
	21.3	0.993712	0.98898	0.990743	1.01643	1.01343	0.999632	0.98336	0.989825	0.989795	0.987603	0.991068	0.991068	0.992494	0.989474	0.995098	0.978865	0.986892	1.0011	1.00096			21.3	0.998637	0.997964	0.984416	0.992025	0.994573	0.994442	0.989569	1.01576	0.978886	0.997869	1.00795	0.981186	0.990353	0.99339	0.984924	1.01852	1.02355	1.02508	1.00501
	21.4	0.992101	0.987882	0.99281	1.01948	1.01343	0.995957	0.98336	0.989825	0.986619	0.980697	0.986538	0.986538	0.988155	0.990363	0.993003	0.971079	0.983673	1.0001	1.00832			21.4	0.998202	0.994241	0.989054	0.99565	0.998705	1.00133	0.987341	1.01408	0.981534	0.998735	1.00591	0.981186	0.980111	0.99339	0.984924	1.01575	1.02018	1.01947	1.00605
	21.5	0.992476	0.987882	0.990743	1.01338	1.01226	1.00086	0.984419	0.988716	0.991912	0.97897	0.990162	0.990162	0.98707	0.988585	0.990908	0.979978	0.982601	1.0001	1.00586			21.5	0.997848	0.999206	0.987895	0.992025	0.99595	0.997887	0.990684	1.01828	0.979769	0.996137	1.00693	0.986249	0.98728	0.992459	0.978563	1.01205	1.02018	1.01574	1.00397
	21.6	0.992957	0.986784	0.991777	1.01643	1.01343	0.999632	0.98336	0.988716	0.991912	0.982423	0.996503	0.996503	0.985986	0.991252	0.988813	0.977753	0.983673	0.996084	1.00218			21.6	0.998631	0.996723	0.987895	0.992025	0.998705	1.00018	0.988455	1.01324	0.978004	1.0048	1.00795	0.983211	0.986256	0.99339	0.981743	1.01205	1.02355	1.02321	1.00397
	21.7	0.990973	0.983491	0.996942	1.01541	1.01109	0.998407	0.981243	0.988716	0.985561	0.971201	0.98835	0.98835	0.976224	0.989474	0.991955	0.979978	0.991182	0.994076	1.00586			21.7	0.998521	1.00293	0.991373	0.99565	0.997328	1.00363	0.986226	1.01239	0.982417	1.0022	1.00693	0.986249	0.986256	0.981287	0.976442	1.0102	1.02355	1.02228	1.00605
	21.8	0.992151	0.990077	0.991777	1.01643	1.00992	0.997182	0.985477	0.990933	0.986619	0.979834	0.991068	0.991068	0.982732	0.987696	0.988813	0.983315	0.982601	0.996084	1.00709			21.8	0.997858	1.00293	0.992533	0.990817	0.994573	1.00593	0.986226	1.01071	0.984182	0.999602	1.01102	0.985237	0.983183	0.986873	0.977503	1.00651	1.02018	1.01947	1.00397
	21.9	0.991752	0.985687	0.990743	1.02658	1.0146	0.998407	0.982302	0.987608	0.985561	0.97638	0.99288	0.99288	0.985986	0.985918	0.990908	0.976641	0.981528	0.991063	1.00586			21.9	0.997039	1.00293	0.991373	0.99565	0.998705	1.00937	0.986226	1.01324	0.975356	1.00307	1.00898	0.988274	0.990353	0.983149	0.975382	1.00281	1.01232	1.01387	0.995656
	22	0.992441	0.983491	0.994876	1.02861	1.01343	0.997182	0.984419	0.988716	0.983443	0.97638	0.993785	0.993785	0.983816	0.988585	0.993003	0.978865	0.982601	0.993072	1.00586			22	0.998514	1.00417	0.990214	0.99565	0.997328	1.00707	0.989569	1.01324	0.985065	0.998735	1.01204	0.982199	0.988304	0.986873	0.980683	1.00836	1.02018	1.01481	0.998774
	22.1	0.993076	0.990077	0.994876	1.02658	1.01343	0.997182	0.984419	0.990933	0.982385	0.974654	0.99288	0.99288	0.985986	0.991252	0.98986	0.977753	0.985819	0.996084	1.00832			22.1	0.996406	0.999206	0.992533	0.993233	0.99595	1.00248	0.991798	1.00987	0.980652	1.00133	1.01204	0.978149	0.981135	0.985942	0.981743	1.00466	1.01681	1.01107	0.996695
	22.2	0.993793	0.98898	0.994876	1.02963	1.00992	0.998407	0.981243	0.987608	0.983443	0.977244	0.991068	0.991068	0.985986	0.992141	0.99405	0.979978	0.987964	1.00512	1.00954			22.2	0.997112	1.00417	0.990214	0.993233	0.994573	1.00363	0.986226	1.0023	0.978004	1.00047	1.01409	0.983211	0.983183	0.986873	0.980683	1.00558	1.01906	1.01854	1.00397
	22.3	0.992975	0.986784	0.99281	1.0276	1.01226	0.994732	0.986536	0.990933	0.980268	0.977244	0.995597	0.995597	0.98707	0.99303	0.988813	0.974416	0.983673	0.999096	1.00709			22.3	0.9981	1.00169	0.990214	0.989609	0.993195	1.00363	0.982883	1.00903	0.978004	1.00133	1.01511	0.991312	0.988304	0.987804	0.983864	1.00558	1.02018	1.02321	1.00085
	22.4	0.994274	0.984589	0.99281	1.02658	1.01109	0.995957	0.984419	0.990933	0.984502	0.98156	1.00013	1.00013	0.98924	0.993919	0.993003	0.976641	0.989037	0.994076	1.00832			22.4	0.998876	1.00169	0.989054	0.996858	1.00008	1.00363	0.985112	1.0208	0.981534	1.00307	1.01102	0.983211	0.98728	0.992459	0.983864	1.00558	1.01793	1.01574	1.00085
	22.5	0.993193	0.984589	0.991777	1.0276	1.00992	0.999632	0.985477	0.988716	0.984502	0.978107	0.997409	0.997409	0.988155	0.99303	0.990908	0.98109	0.983673	0.992067	1.00341			22.5	0.998194	1.00045	0.991373	0.992025	0.993195	1.00248	0.985112	1.00567	0.975356	1.00133	1.01204	0.992325	0.988304	0.988735	0.984924	1.01113	1.02355	1.01761	1.00189
	22.6	0.994498	0.985687	0.997975	1.03471	1.00992	0.994732	0.984419	0.99315	0.982385	0.97897	0.99288	0.99288	0.985986	0.993919	0.991955	0.984427	0.99011	0.996084	1.01077			22.6	0.995824	1.00169	0.990214	0.993233	0.994573	1.00363	0.981769	1.00483	0.978004	1.00393	1.00795	0.977136	0.978063	0.988735	0.980683	1.01205	1.01569	1.01387	0.998774
	22.7	0.99427	0.987882	0.996942	1.03166	1.00992	1.00086	0.982302	0.989825	0.982385	0.977244	0.997409	0.997409	0.988155	0.991252	0.995098	0.977753	0.989037	0.997088	1.00464			22.7	0.99885	1.00045	0.989054	0.99565	0.997328	0.99559	0.986226	1.00987	0.982417	0.996137	1.01102	0.987262	0.985232	0.994321	0.982804	1.00928	1.02242	1.02508	1.00917
	22.8	0.995068	0.990077	0.995909	1.03471	1.00992	0.997182	0.982302	0.989825	0.985561	0.97897	0.991068	0.991068	0.984901	0.994808	1.00138	0.988877	0.989037	0.996084	1.00954			22.8	0.996517	1.00417	0.987895	0.993233	0.99595	0.996739	0.986226	1.00735	0.982417	0.994404	1.01	0.983211	0.981135	0.990597	0.977503	1.00651	1.0213	1.01574	1.00293
	22.9	0.993734	0.986784	0.999008	1.03471	1.00875	0.997182	0.979126	0.986499	0.984502	0.982423	0.989256	0.989256	0.98924	0.991252	0.99824	0.987764	0.987964	0.993072	1.00218			22.9	0.996141	1.00045	0.985576	0.992025	0.993195	0.99559	0.987341	1.01071	0.984182	0.998735	1.00898	0.980174	0.978063	0.992459	0.978563	1.01205	1.01793	1.01574	0.998774
	23	0.993729	0.990077	0.996942	1.03775	1.01226	1.00086	0.984419	0.984283	0.982385	0.98156	0.990162	0.990162	0.981647	0.985918	0.997193	0.985539	0.989037	0.991063	1.00586			23	0.996674	0.997964	0.987895	0.993233	0.994573	0.996739	0.987341	1.00062	0.980652	1.00393	1.01102	0.982199	0.982159	0.989666	0.981743	1.01298	1.01906	1.01854	0.999813
	23.1	0.993878	0.98898	0.997975	1.03674	1.00992	0.998407	0.984419	0.985391	0.980268	0.97897	0.991974	0.991974	0.992494	0.985918	0.995098	0.984427	0.983673	0.996084	1.00709			23.1	0.996778	1.00293	0.983257	0.994442	0.99595	0.99559	0.983997	1.00903	0.984182	1.00047	1.00795	0.987262	0.981135	0.991528	0.981743	1.01205	1.01793	1.01481	0.997734
	23.2	0.992965	0.98898	0.99281	1.03572	1.00992	1.00086	0.982302	0.987608	0.97815	0.974654	0.990162	0.990162	0.992494	0.988585	0.993003	0.982202	0.985819	0.994076	1.00586			23.2	0.998267	0.999206	0.987895	0.992025	0.994573	1.00018	0.985112	1.00819	0.979769	1.0022	1.01102	0.986249	0.986256	0.990597	0.981743	1.01575	1.01681	1.02414	1.00709
	23.3	0.991971	0.983491	0.991777	1.03572	1.01226	0.997182	0.980185	0.983174	0.980268	0.978107	0.989256	0.989256	0.991409	0.983251	0.990908	0.983315	0.984746	0.994076	1.00709			23.3	0.998743	1.00169	0.992533	0.99565	0.998705	0.996739	0.989569	1.00903	0.984182	0.997003	1.00898	0.9903	0.985232	0.991528	0.984924	1.00928	1.01569	1.02134	1.00501
	23.4	0.993275	0.983491	0.997975	1.03369	1.01109	0.999632	0.982302	0.985391	0.980268	0.975517	0.989256	0.989256	0.993579	0.991252	0.995098	0.987764	0.983673	0.99508	1.00464			23.4	1.00003	1.00417	0.990214	0.996858	0.998705	0.997887	0.991798	1.00735	0.987713	1.00566	1.00489	0.988274	0.983183	0.989666	0.987044	1.01482	1.01906	1.02508	1.00813
	23.5	0.993121	0.985687	0.996942	1.03268	1.01226	0.998407	0.981243	0.986499	0.979209	0.972064	0.990162	0.990162	0.999002	0.98414	0.995098	0.983315	0.983673	0.996084	1.00954			23.5	0.999218	1.00417	0.990214	0.996858	0.998705	0.993294	0.989569	1.00819	0.988596	0.998735	1.00795	0.984224	0.982159	0.995252	0.985984	1.01205	1.01906	1.02694	1.00397
	23.6	0.994004	0.985687	0.995909	1.03166	1.0146	0.998407	0.981243	0.983174	0.977092	0.97897	0.990162	0.990162	1.00117	0.993919	1.00034	0.991101	0.986892	0.993072	0.998503			23.6	0.999998	1.00293	0.990214	0.994442	0.997328	0.999035	0.985112	1.01324	0.98683	1.00307	1.01	0.9903	0.988304	0.995252	0.985984	1.01482	1.01345	1.02881	1.00085
	23.7	0.994516	0.983491	0.999008	1.03369	1.01343	1.00086	0.979126	0.983174	0.982385	0.97638	0.991068	0.991068	1.00009	0.995697	0.996145	0.992214	0.984746	0.994076	1.00464			23.7	0.998157	1.00169	0.992533	0.99565	0.994573	0.994442	0.985112	1.00483	0.987713	0.998735	1.01	0.985237	0.985232	0.992459	0.984924	1.01113	1.01457	1.02508	1.00293
	23.8	0.993858	0.983491	0.996942	1.03369	1.0146	0.999632	0.979126	0.984283	0.984502	0.98415	0.98835	0.98835	0.994663	0.987696	0.997193	0.985539	0.987964	0.997088	1.00218			23.8	0.999125	1.00417	0.986735	0.993233	0.991818	0.999035	0.982883	1.0166	0.982417	0.999602	1.01	0.985237	0.98728	0.99339	0.989165	1.01482	1.02018	1.02788	0.999813
	23.9	0.993544	0.986784	0.997975	1.03268	1.01343	0.998407	0.979126	0.985391	0.980268	0.979834	0.987444	0.987444	0.994663	0.99303	0.99824	0.988877	0.987964	0.990059	1.00218			23.9	0.997613	0.997964	0.985576	0.996858	0.99595	0.997887	0.991798	1.00903	0.978886	1.00653	1.00489	0.982199	0.982159	0.988735	0.983864	1.0102	1.02242	1.02228	0.999813
	24	0.9911	0.98898	0.990743	1.02963	1.00758	0.998407	0.98336	0.989825	0.982385	0.97897	0.98382	0.98382	0.98924	0.982362	0.993003	0.978865	0.97831	0.997088	1.00341			24	0.997915	0.999206	0.989054	0.990817	0.99044	0.990997	0.991798	1.00903	0.980652	1.00393	1.00693	0.988274	0.979087	0.992459	0.981743	1.01482	1.02242	1.02788	1.00293
	24.1	0.991798	0.986784	0.99281	1.02658	1.01109	0.997182	0.981243	0.984283	0.980268	0.97638	0.987444	0.987444	0.996833	0.992141	0.99405	0.984427	0.982601	0.991063	0.99973			24.1	0.998431	1.00045	0.985576	0.996858	0.99595	0.989849	0.986226	1.0208	0.985065	1.00653	1.00795	0.986249	0.983183	0.992459	0.978563	1.01575	1.02018	1.02134	0.998774
	24.2	0.993238	0.984589	0.997975	1.02963	1.00758	0.998407	0.981243	0.986499	0.985561	0.974654	0.990162	0.990162	0.994663	0.985918	0.996145	0.987764	0.985819	0.998092	1.00341			24.2	0.998373	0.999206	0.986735	0.994442	0.993195	0.997887	0.982883	1.01744	0.987713	1.00393	1.01	0.980174	0.979087	0.992459	0.980683	1.01482	1.02018	1.02694	1.00293
	24.3	0.991983	0.984589	0.995909	1.02354	1.00992	0.998407	0.98336	0.986499	0.986619	0.973791	0.984726	0.984726	0.981647	0.988585	0.995098	0.988877	0.986892	0.999096	1.00341			24.3	0.997554	0.997964	0.989054	0.992025	0.991818	1.00363	0.985112	1.00062	0.978886	1.01173	1.00898	0.987262	0.984208	0.986873	0.976442	1.00836	1.02242	1.02974	1.00085
	24.4	0.993463	0.984589	0.993843	1.0276	1.01226	0.998407	0.981243	0.984283	0.989795	0.98415	0.99288	0.99288	0.991409	0.987696	0.993003	0.984427	0.985819	0.997088	1.00096			24.4	0.999369	1.00169	0.985576	0.990817	0.991818	1.00822	0.990684	1.00987	0.979769	1.00393	1.01	0.987262	0.982159	0.992459	0.989165	1.0139	1.02467	1.02788	0.998774
	24.5	0.99374	0.995566	0.99281	1.02455	1.0146	0.999632	0.984419	0.990933	0.987678	0.98156	0.98835	0.98835	0.988155	0.985918	0.995098	0.985539	0.986892	0.99508	1.00218			24.5	0.998668	0.999206	0.985576	0.992025	0.993195	0.996739	0.995141	1.00903	0.984182	1.0048	1.00898	0.986249	0.981135	0.992459	0.990225	1.01298	1.0213	1.02508	0.997734
	24.6	0.992872	0.995566	0.997975	1.02557	1.01343	0.998407	0.980185	0.983174	0.982385	0.979834	0.99288	0.99288	0.98924	0.985029	0.993003	0.982202	0.983673	0.994076	1.00218			24.6	0.998225	0.996723	0.985576	0.990817	0.993195	1.00133	0.986226	1.01744	0.984182	1.00913	1.00795	0.983211	0.984208	0.986873	0.981743	1.0139	1.01681	1.02788	1.00085
	24.7	0.993482	0.995566	1.00004	1.02658	1.01226	0.998407	0.977009	0.982066	0.985561	0.98674	0.99288	0.99288	0.991409	0.989474	0.991955	0.979978	0.982601	0.99508	1.00218			24.7	0.998668	1.00045	0.985576	0.987192	0.989062	0.996739	0.990684	1.00399	0.9833	1.00133	1.01102	0.989287	0.985232	0.990597	0.984924	1.01482	1.02355	1.03535	1.00293
	24.8	0.991724	0.987882	0.994876	1.02455	1.00992	0.994732	0.98336	0.982066	0.974975	0.979834	0.991068	0.991068	0.98707	0.987696	0.98986	0.987764	0.985819	0.99508	1.00341			24.8	0.997664	1.00293	0.983257	0.990817	0.991818	1.01626	0.986226	1.00483	0.978004	0.998735	1.00898	0.983211	0.980111	0.978494	0.988105	1.0139	1.01681	1.03254	1.00293
	24.9	0.992092	0.990077	0.99281	1.02252	1.00524	1.01188	0.978068	0.979849	0.981326	0.979834	0.990162	0.990162	0.988155	0.985918	0.99405	0.989989	0.985819	0.992067	0.99973			24.9	0.998078	0.997964	0.983257	0.9884	0.99044	1.00822	0.992913	1.01324	0.980652	0.993538	1.01102	0.988274	0.981135	0.983149	0.982804	1.01482	1.01906	1.03254	1.00397
	25	0.993978	0.990077	0.993843	1.03674	1.00992	0.997182	0.98336	0.990933	0.979209	0.980697	0.98835	0.98835	0.992494	0.987696	0.99405	0.993326	0.986892	0.99508	1.00341			25	0.996357	0.996723	0.979778	0.9884	0.99044	1.00937	0.992913	1.0023	0.977121	0.992672	1.00795	0.987262	0.986256	0.98408	0.982804	1.00928	1.01793	1.03348	0.995656
	25.1	0.990429	0.984589	0.993843	1.02557	1.00758	0.994732	0.980185	0.985391	0.981326	0.975517	0.985632	0.985632	0.990325	0.986807	0.98986	0.988877	0.984746	0.991063	0.99605			25.1	0.997923	0.994241	0.978619	0.9884	0.991818	1.00593	0.994027	1.01744	0.982417	0.999602	1.01	0.981186	0.983183	0.991528	0.991285	1.01575	1.01345	1.02601	0.997734
	25.2	0.992046	0.991175	0.997975	1.02354	1.00992	0.998407	0.978068	0.987608	0.979209	0.979834	0.986538	0.986538	0.98707	0.985029	0.991955	0.984427	0.989037	0.997088	1.00341			25.2	0.998436	0.995482	0.979778	0.990817	0.993195	1.00478	0.987341	1.01744	0.985065	0.997869	1.00898	0.984224	0.981135	0.986873	0.987044	1.01852	1.01793	1.03348	1.00189
	25.3	0.99322	0.991175	0.994876	1.02658	1.0146	0.997182	0.982302	0.987608	0.97815	0.980697	0.994691	0.994691	0.992494	0.985918	0.988813	0.982202	0.989037	0.991063	1.00586			25.3	0.999353	0.996723	0.977459	0.989609	0.994573	1.00822	0.989569	1.01912	0.985948	1.01	1.00489	0.980174	0.988304	0.998045	0.987044	1.01852	1.01569	1.02881	0.995656
	25.4	0.993787	0.995566	0.995909	1.02861	1.0146	0.999632	0.984419	0.988716	0.979209	0.97897	0.991068	0.991068	0.995748	0.990363	0.993003	0.982202	0.985819	0.991063	1.00218			25.4	1.00034	0.995482	0.979778	0.993233	0.997328	1.01282	0.991798	1.01828	0.994775	1.01346	1.00693	0.980174	0.983183	0.990597	0.985984	1.01575	1.01681	1.02788	1.00189
	25.5	0.992139	0.991175	0.988677	1.02658	1.00992	0.997182	0.981243	0.984283	0.981326	0.97897	0.990162	0.990162	0.98924	0.989474	0.99405	0.987764	0.985819	0.989055	1.00341			25.5	1.00069	0.995482	0.982097	0.990817	0.99595	1.01396	0.995141	1.00735	0.992127	1.01606	1.00284	0.983211	0.986256	0.992459	0.983864	1.01298	1.0213	1.03441	1.00605
	25.6	0.99303	0.992273	0.990743	1.0276	1.01226	0.995957	0.982302	0.988716	0.982385	0.98156	0.990162	0.990162	0.993579	0.983251	0.995098	0.986652	0.989037	0.993072	0.99973			25.6	1.00145	0.996723	0.982097	0.998067	0.998705	1.01511	0.991798	1.02837	0.995657	1.02472	1.00182	0.978149	0.980111	0.989666	0.979623	1.00743	1.02355	1.03161	1.00293
	25.7	0.994644	0.997761	0.988677	1.03065	1.01343	0.999632	0.982302	0.986499	0.987678	0.98415	0.995597	0.995597	0.992494	0.987696	0.993003	0.987764	0.984746	0.990059	1.00586			25.7	1.00407	0.997964	0.984416	0.998067	0.998705	1.01167	0.996256	1.03089	1.00184	1.02126	1.00693	0.982199	0.982159	0.994321	0.984924	1.01667	1.02579	1.03628	1.00293
	25.8	0.993793	0.997761	0.99281	1.02963	1.0146	1.00086	0.984419	0.987608	0.977092	0.980697	0.991974	0.991974	0.98924	0.988585	0.996145	0.989989	0.986892	0.987047	1.00096			25.8	1.00504	1.00045	0.983257	1.00169	1.00146	1.01052	0.995141	1.02501	1.00713	1.02472	1.00795	0.988274	0.985232	0.998976	0.985984	1.01298	1.02467	1.03535	1.00189
	25.9	0.995856	1.00215	0.991777	1.03572	1.01695	1.00576	0.98336	0.987608	0.982385	0.988466	0.991974	0.991974	0.990325	0.989474	0.99405	0.987764	0.987964	0.993072	1.00464			25.9	1.00511	0.994241	0.986735	1.00169	1.00008	1.01167	0.99737	1.04182	1.00978	1.02992	1.00898	0.979161	0.981135	0.998976	0.983864	1.01113	1.0213	1.03535	0.998774
	26	0.99664	1.00654	0.996942	1.03369	1.01577	1.00331	0.984419	0.990933	0.984502	0.982423	0.993785	0.993785	0.999002	0.99303	0.993003	0.986652	0.983673	0.997088	1.00096			26	1.00916	1.00045	0.992533	1.00532	1.00284	1.01282	1.00071	1.0393	1.0089	1.03512	1.01409	0.981186	0.98728	1.00456	0.987044	1.01667	1.02916	1.04095	1.00605
	26.1	0.997839	1.00544	0.991777	1.03877	1.01812	1.00331	0.988653	0.994258	0.986619	0.987603	0.991974	0.991974	1.00226	0.990363	0.996145	0.987764	0.989037	0.996084	1.00096			26.1	1.01024	0.999206	0.992533	1.00894	1.00422	1.00822	0.999599	1.03005	1.0089	1.03165	1.0192	0.988274	0.988304	1.00829	0.989165	1.02129	1.03477	1.04468	1.00709
	26.2	1.00055	1.01093	0.987644	1.04385	1.02163	1.01066	0.987594	0.990933	0.991912	0.990193	0.997409	0.997409	1.00009	0.998364	0.99824	0.991101	0.985819	0.999096	1.00709			26.2	1.01283	1.00045	0.994852	1.01015	1.00559	1.01626	0.999599	1.0351	1.0089	1.03165	1.01818	0.991312	0.993425	1.00549	0.991285	1.02592	1.0415	1.05215	1.00917
	26.3	1.00207	1.00654	0.993843	1.04588	1.02163	1.00821	0.99077	0.99315	0.998264	0.99192	1.00556	1.00556	1.00551	0.997475	0.993003	0.984427	0.987964	0.998092	1.00954			26.3	1.01417	1.00169	0.99833	1.01015	1.00559	1.01856	1.00851	1.04014	1.01155	1.02819	1.02431	0.987262	0.986256	1.01294	0.995526	1.02314	1.0415	1.05122	1.01021
	26.4	1.00519	1.01532	0.995909	1.04994	1.02397	1.00943	0.993945	0.997584	1.00356	1.00228	1.00466	1.00466	1.00443	1.00548	0.991955	0.983315	0.99011	1.00613	1.01077			26.4	1.01618	1.00417	1.00413	1.01377	1.00697	1.02889	1.00183	1.0351	1.01066	1.03338	1.02329	0.991312	0.992401	1.01201	0.993406	1.02592	1.04263	1.05588	1.0154
	26.5	1.00796	1.01862	0.995909	1.05806	1.02631	1.01311	0.993945	0.998692	1.00356	1.00055	1.0119	1.0119	1.01202	1.00814	0.996145	0.986652	0.992255	1.00713	1.00832			26.5	1.01559	1.00665	1.00181	1.01136	1.00697	1.02889	1.00629	1.03678	1.01419	1.02992	1.02329	0.988274	0.989328	1.01015	0.989165	1.02684	1.04263	1.05588	1.01228
	26.6	1.01057	1.01862	1.00107	1.05705	1.02631	1.01433	0.999238	1.00091	1.00567	1.00055	1.01372	1.01372	1.01636	1.01259	1.00243	0.987764	0.998691	1.01416	1.00709			26.6	1.01813	1.00293	1.00877	1.02102	1.00973	1.02774	1.0074	1.04014	1.01684	1.02559	1.02124	0.989287	0.989328	1.01294	0.995526	1.03331	1.04375	1.06335	1.01748
	26.7	1.01213	1.01971	0.996942	1.06517	1.02748	1.01801	0.996062	1.00423	1.00673	1.00314	1.01734	1.01734	1.01744	1.0117	1.00243	0.987764	0.996546	1.01215	1.01813			26.7	1.01911	1.01038	1.01224	1.01861	1.00973	1.02545	1.00629	1.0351	1.01596	1.03078	1.02329	0.999413	0.995473	1.01667	0.995526	1.02961	1.04263	1.06242	1.01436
	26.8	1.01772	1.01971	1.00417	1.07025	1.03333	1.01923	1.00241	1.00978	1.01732	1.0066	1.0273	1.0273	1.01744	1.02592	1.00453	0.993326	0.999764	1.02621	1.01445			26.8	1.02115	1.01286	1.01688	1.01861	1.00835	1.02545	1.0074	1.04687	1.01419	1.02819	1.02533	0.99435	0.99957	1.01667	0.994466	1.02776	1.04824	1.07176	1.02372
	26.9	1.01682	1.01752	0.996942	1.06923	1.02982	1.01923	0.999238	0.9998	1.00462	1.00228	1.03183	1.03183	1.0207	1.02948	1.00871	0.991101	1.00513	1.02219	1.02304			26.9	1.02156	1.01286	1.01804	1.02102	1.01248	1.02545	1.00517	1.04014	1.01155	1.03425	1.0284	0.99435	0.995473	1.0176	0.995526	1.03054	1.05048	1.06895	1.0258
	27	1.02103	1.02081	1.00831	1.07228	1.03684	1.02046	1.00771	1.00645	1.0152	1.00746	1.02912	1.02912	1.02503	1.03304	1.015	0.992214	1.00405	1.02621	1.02917			27	1.02392	1.01038	1.02036	1.02223	1.01386	1.03234	1.00406	1.04855	1.02037	1.03165	1.03044	1.00043	0.99957	1.02504	0.997646	1.03054	1.05048	1.06895	1.02372
	27.1	1.02154	1.02081	1.00624	1.07634	1.03801	1.01801	1.013	1.01199	1.00779	1.0066	1.02912	1.02912	1.02937	1.03037	1.015	0.991101	1.00298	1.03524	1.02672			27.1	1.02285	1.01286	1.025	1.01982	1.01248	1.03348	1.00294	1.04267	1.01243	1.03078	1.02942	0.997388	0.995473	1.02598	0.995526	1.03146	1.0516	1.06615	1.0258
	27.2	1.02293	1.01862	1.01037	1.0804	1.03684	1.02413	1.00876	1.00756	1.00144	1.00573	1.03636	1.03636	1.0272	1.03481	1.02024	0.993326	1.0062	1.03022	1.03408			27.2	1.02517	1.01658	1.02384	1.02102	1.01661	1.03463	1.00071	1.05528	1.01684	1.02819	1.03351	1.00853	1.00367	1.02784	1.00189	1.02869	1.04824	1.06429	1.02268
	27.3	1.02409	1.02191	1.01141	1.07939	1.03918	1.02413	1.00771	1.00756	1.00779	1.01178	1.03183	1.03183	1.02937	1.03748	1.02233	0.993326	1.01156	1.03826	1.02672			27.3	1.02434	1.0141	1.02964	1.0174	1.0111	1.03923	1.00071	1.05276	1.01772	1.03165	1.03249	0.999413	0.99957	1.02691	0.999767	1.02961	1.04599	1.06522	1.02476
	27.4	1.02506	1.01971	1.01347	1.08142	1.04035	1.02536	1.00771	1.00867	1.00885	1.01091	1.03546	1.03546	1.03263	1.03481	1.02652	0.998888	1.00727	1.03324	1.0304			27.4	1.02716	1.02031	1.02848	1.01619	1.01248	1.04037	1.00406	1.04939	1.01949	1.04291	1.03555	1.00853	1.00367	1.03156	1.00401	1.03146	1.05048	1.06522	1.02476
	27.5	1.02404	1.01532	1.00727	1.07837	1.04386	1.02536	1.01088	1.01643	1.01308	1.01005	1.03274	1.03274	1.02937	1.03304	1.02547	0.993326	1.00513	1.03725	1.02304			27.5	1.02551	1.02031	1.0308	1.01619	1.01524	1.04382	1.00294	1.04351	1.01243	1.04291	1.03249	1.00245	0.99957	1.02691	1.00189	1.03146	1.04263	1.06895	1.02476
	27.6	1.02697	1.01752	1.01244	1.0804	1.04386	1.02658	1.00876	1.01643	1.01944	1.0135	1.03636	1.03636	1.02612	1.03215	1.03176	1.00445	1.01049	1.04328	1.02549			27.6	1.02574	1.02031	1.03427	1.01498	1.01386	1.04152	1.00183	1.03594	1.02214	1.03945	1.03658	0.999413	0.99957	1.02784	1.00507	1.02869	1.04599	1.06895	1.02683
	27.7	1.02777	1.01423	1.01347	1.07735	1.04386	1.02291	1.01194	1.01975	1.01838	1.01178	1.03727	1.03727	1.0348	1.03037	1.037	1.00334	1.01156	1.04428	1.0304			27.7	1.02727	1.02031	1.03659	1.01861	1.01248	1.04152	0.996256	1.04939	1.01772	1.03945	1.03658	1.00346	0.998546	1.02877	1.00825	1.02869	1.0516	1.07269	1.02995
	27.8	1.02954	1.01423	1.01657	1.08751	1.0462	1.03026	1.01512	1.01754	1.01838	1.01696	1.03727	1.03727	1.03263	1.03837	1.0349	1	1.00942	1.04629	1.03285			27.8	1.02627	1.02031	1.04007	1.01377	1.01524	1.03808	1.00294	1.04098	1.02125	1.04118	1.03453	1.0065	0.997522	1.02132	1.00613	1.02776	1.04375	1.07362	1.02787
	27.9	1.02931	1.01532	1.01967	1.08243	1.04737	1.02536	1.01406	1.01532	1.0152	1.01091	1.0418	1.0418	1.03371	1.0357	1.037	1.00111	1.01049	1.04629	1.03408			27.9	1.02705	1.02155	1.04239	1.01498	1.01248	1.03578	0.999599	1.04014	1.01949	1.04205	1.03555	1.00853	1.00367	1.02504	1.01037	1.02222	1.04375	1.07829	1.03099
	28	1.03041	1.01423	1.01864	1.08446	1.04971	1.02536	1.01617	1.01864	1.02049	1.00832	1.03908	1.03908	1.04022	1.03748	1.03595	1.00556	1.00835	1.05031	1.0353			28	1.02795	1.02155	1.04471	1.01257	1.01937	1.03693	0.995141	1.04182	1.02302	1.05071	1.03658	1.00245	0.99957	1.02504	1.01673	1.02961	1.04263	1.07362	1.03099
	28.1	1.02932	1.01423	1.01554	1.08243	1.04971	1.02536	1.013	1.01754	1.01944	1.01178	1.03636	1.03636	1.03046	1.03659	1.037	1.00667	1.01049	1.0483	1.03653			28.1	1.02664	1.02155	1.04355	1.00894	1.01248	1.03693	0.995141	1.04267	1.01684	1.04724	1.0376	1.0065	0.99957	1.02784	1.01673	1.02776	1.0415	1.07082	1.0258
	28.2	1.0308	1.01971	1.01967	1.08243	1.0462	1.02903	1.013	1.01864	1.02367	1.01696	1.03727	1.03727	1.03046	1.03748	1.0349	1.01001	1.01156	1.0483	1.03776			28.2	1.02641	1.02279	1.04239	1.01015	1.00835	1.03004	0.995141	1.0393	1.01596	1.04811	1.03964	1.00549	1.00776	1.02318	1.01249	1.02684	1.03926	1.07549	1.03307
	28.3	1.03116	1.01862	1.01244	1.08548	1.04971	1.02903	1.01088	1.01643	1.02367	1.02041	1.03727	1.03727	1.03154	1.03748	1.03595	1.01557	1.01371	1.05131	1.03408			28.3	1.02656	1.02031	1.04239	1.01136	1.0111	1.03348	0.996256	1.03678	1.02302	1.04811	1.03862	1.00448	1.00367	1.02411	1.01461	1.02869	1.03814	1.06989	1.03307
	28.4	1.03013	1.01423	1.02174	1.08243	1.0462	1.02536	1.00771	1.01643	1.01203	1.00919	1.03818	1.03818	1.03154	1.0437	1.04014	1.01224	1.01371	1.05533	1.03408			28.4	1.02617	1.02279	1.04007	1.01136	1.01248	1.03348	0.996256	1.04014	1.01508	1.04638	1.04271	1.00346	1.00162	1.02504	1.01355	1.02684	1.03814	1.07269	1.02891
	28.5	1.03018	1.01752	1.0207	1.08954	1.05205	1.03148	1.00453	1.01643	1.01732	1.01005	1.03636	1.03636	1.02937	1.04104	1.03804	1.01112	1.01049	1.04428	1.03653			28.5	1.02701	1.02403	1.03659	1.01015	1.0111	1.02889	1.00071	1.03173	1.02037	1.04118	1.04578	1.00751	1.00674	1.02691	1.01779	1.02961	1.03814	1.07269	1.03619
	28.6	1.02997	1.01752	1.0207	1.08954	1.05088	1.03148	1.00559	1.01421	1.01944	1.0135	1.03818	1.03818	1.0272	1.03659	1.04014	1.0089	1.0062	1.0483	1.03285			28.6	1.02619	1.01907	1.03891	1.00532	1.01248	1.03004	0.995141	1.03762	1.02125	1.04464	1.04067	1.00954	1.00264	1.03063	1.01991	1.02869	1.03477	1.06802	1.03203
	28.7	1.02984	1.01313	1.0176	1.08649	1.0462	1.02903	1.00559	1.01864	1.01308	1.01264	1.03908	1.03908	1.02937	1.0357	1.04328	1.01335	1.00942	1.05131	1.03408			28.7	1.02613	1.02403	1.04123	1.00532	1.00973	1.02545	0.992913	1.04855	1.02125	1.05071	1.04169	0.999413	1.00367	1.02411	1.01779	1.02776	1.03365	1.06895	1.03411
	28.8	1.03117	1.01862	1.02174	1.08345	1.04971	1.03271	1.00241	1.01421	1.0152	1.01437	1.0427	1.0427	1.0348	1.03659	1.04642	1.01557	1.00942	1.04629	1.03408			28.8	1.02678	1.02403	1.04239	1.00411	1.0111	1.02889	0.987341	1.04435	1.02125	1.04984	1.04578	1.00549	1.01186	1.02411	1.01461	1.02776	1.03028	1.07362	1.03515
	28.9	1.0297	1.01423	1.01967	1.08649	1.0462	1.02903	1.00559	1.01421	1.00991	1.00746	1.0427	1.0427	1.03371	1.04015	1.03909	1.01557	1.01049	1.0483	1.02917			28.9	1.02638	1.03024	1.03891	1.00652	1.00973	1.02889	0.991798	1.04014	1.02302	1.03945	1.04373	1.00346	1.00776	1.02598	1.02309	1.03423	1.03252	1.06429	1.03099
	29	1.02997	1.01752	1.01967	1.08243	1.04971	1.02903	1.01088	1.01532	1.00673	1.00401	1.0418	1.0418	1.02937	1.03215	1.04014	1.01446	1.01264	1.05533	1.03653			29	1.02718	1.02775	1.04123	1.00532	1.00973	1.0243	0.991798	1.04182	1.0239	1.04638	1.04578	1.00954	1.00674	1.03063	1.02309	1.03608	1.02804	1.06615	1.03099
	29.1	1.0286	1.01203	1.02484	1.08243	1.04971	1.02903	1.00982	1.01643	1.01414	1.00228	1.03727	1.03727	1.02612	1.03304	1.03385	1.0089	1.01049	1.0493	1.03776			29.1	1.02778	1.02775	1.04471	1.00532	1.0111	1.02889	0.989569	1.04603	1.02302	1.04205	1.04884	1.00954	1.00674	1.0297	1.01991	1.03331	1.02691	1.06522	1.04139
	29.2	1.02905	1.01203	1.02587	1.08142	1.04971	1.03148	1.00665	1.01421	1.01097	1.00573	1.03818	1.03818	1.0272	1.03126	1.03176	1.01446	1.01264	1.05332	1.03776			29.2	1.025	1.029	1.04935	1.0029	1.00973	1.02315	0.999599	1.03678	1.01949	1.04291	1.04271	1.00549	1.00264	1.02784	1.02521	1.03793	1.02018	1.04935	1.0258
	29.3	1.02993	1.01093	1.0207	1.08345	1.05322	1.03148	1.00876	1.01643	1.01414	1.01437	1.03727	1.03727	1.02612	1.03037	1.037	1.01557	1.01049	1.05332	1.03776			29.3	1.0258	1.03024	1.04471	1.00169	1.00973	1.01971	0.999599	1.03173	1.02214	1.04551	1.03964	1.00549	1.00571	1.0297	1.02203	1.03239	1.02355	1.06149	1.03931
	29.4	1.02934	1.00983	1.02587	1.0804	1.05088	1.03271	1.00771	1.01532	1.00567	1.00401	1.0418	1.0418	1.03046	1.02681	1.03804	1.02225	1.00727	1.0483	1.03898			29.4	1.02478	1.029	1.04471	1.0029	1.00559	1.01856	0.996256	1.0351	1.01949	1.03685	1.0376	1.01359	1.01186	1.02691	1.02203	1.03608	1.02242	1.05402	1.03307
	29.5	1.02916	1.00983	1.02174	1.08142	1.04737	1.02903	1.00347	1.01421	1.00885	1.01437	1.03999	1.03999	1.03154	1.03837	1.03176	1.01557	1.00835	1.05131	1.03776			29.5	1.02563	1.029	1.04355	1.00411	1.00697	1.01971	0.987341	1.04098	1.02214	1.03252	1.03862	1.01258	1.01698	1.02411	1.01673	1.03793	1.02242	1.06429	1.04139
	29.6	1.02885	1.00983	1.02484	1.08345	1.04737	1.02903	1.00347	1.0131	1.0152	1.01437	1.03908	1.03908	1.02937	1.03659	1.0349	1.0089	1.0062	1.04428	1.04021			29.6	1.02446	1.029	1.04355	1.0029	1.0111	1.01971	0.990684	1.03594	1.02125	1.04378	1.04067	1.00954	1.01084	1.02318	1.01567	1.03054	1.01906	1.05775	1.03515
	29.7	1.02824	1.00983	1.02174	1.07735	1.04971	1.02903	1.00241	1.0131	1.01308	1.00919	1.03365	1.03365	1.03263	1.03748	1.03281	1.01446	1.01049	1.04629	1.04144			29.7	1.02329	1.029	1.04355	1.00169	1.00973	1.02085	0.989569	1.0393	1.02214	1.03425	1.03862	1.00954	1.00469	1.02411	1.01567	1.02869	1.01906	1.05682	1.03203
	29.8	1.02793	1.00764	1.0207	1.07735	1.04971	1.02658	1.00453	1.01421	1.00779	1.00487	1.03636	1.03636	1.02829	1.03304	1.03909	1.01669	1.01478	1.05432	1.0304			29.8	1.02452	1.02775	1.04471	1.00169	1.0111	1.0243	0.996256	1.03846	1.0239	1.04378	1.0468	1.01258	1.00674	1.01853	1.01143	1.02961	1.01906	1.05775	1.02683
	29.9	1.02955	1.00874	1.02277	1.07735	1.05088	1.02903	1.00347	1.01643	1.01097	1.00746	1.03908	1.03908	1.03046	1.0357	1.03804	1.0178	1.01478	1.05332	1.03653			29.9	1.02393	1.03148	1.04239	1.00169	1.01248	1.0243	0.996256	1.03426	1.02743	1.04378	1.03964	1.0146	1.00674	1.01573	1.01037	1.02407	1.01681	1.05775	1.03099
	30	1.02931	1.00874	1.0238	1.08243	1.04971	1.02658	1.00347	1.0131	1.00462	1.00401	1.04089	1.04089	1.03914	1.03481	1.03909	1.0178	1.00835	1.05231	1.03776			30	1.02436	1.029	1.04007	1.0029	1.0111	1.02545	0.995141	1.03846	1.02567	1.03252	1.03862	1.00954	1.00879	1.01946	1.01461	1.03701	1.02018	1.05682	1.03307
	30.1	1.02819	1.00874	1.02484	1.07837	1.04737	1.02658	1.00453	1.00867	1.0025	1.01005	1.03908	1.03908	1.02829	1.03481	1.03804	1.01891	1.01049	1.0493	1.03776			30.1	1.02506	1.02651	1.04239	1.00411	1.0111	1.02315	0.999599	1.03089	1.02037	1.04464	1.04578	1.00954	1.00981	1.01667	1.01673	1.03886	1.01906	1.05775	1.03411
	30.2	1.02907	1.00764	1.02277	1.07837	1.0462	1.02781	1.00665	1.01532	1.00673	1.01437	1.03727	1.03727	1.0348	1.03748	1.04014	1.0178	1.01478	1.04127	1.03653			30.2	1.02387	1.029	1.03891	0.999275	1.0111	1.022	1.00294	1.03594	1.02302	1.04118	1.03964	1.00549	1.00879	1.02504	1.02097	1.03701	1.01232	1.05028	1.02683
	30.3	1.02808	1.00764	1.02277	1.07939	1.04503	1.02413	1.00559	1.01532	1.00356	1.01437	1.03365	1.03365	1.03154	1.03481	1.037	1.01669	1.0062	1.05633	1.03776			30.3	1.0234	1.02651	1.04355	1.00048	1.00697	1.02085	1.00071	1.03005	1.02214	1.04031	1.04475	1.01359	1.00981	1.02318	1.01779	1.03239	1.01457	1.04561	1.02787
	30.4	1.02741	1.00325	1.02174	1.07735	1.04152	1.02413	1.00453	1.01643	0.990854	0.998826	1.03999	1.03999	1.03263	1.03392	1.04119	1.01891	1.01156	1.05633	1.04021			30.4	1.02465	1.03148	1.04355	0.999275	1.00973	1.022	1.00517	1.03762	1.02125	1.04811	1.04271	1.00751	1.00981	1.01387	1.01567	1.03054	1.02018	1.05215	1.03307
	30.5	1.02953	1.00874	1.02277	1.0804	1.04269	1.02536	1.00347	1.01532	1.0025	1.01005	1.04723	1.04723	1.03588	1.03215	1.04014	1.01557	1.01156	1.05031	1.04021			30.5	1.02344	1.03024	1.04007	1.00048	1.00697	1.0266	1.00851	1.02501	1.02125	1.04551	1.04067	1.00853	1.00162	1.02225	1.01779	1.03701	1.01232	1.05028	1.02683
	30.6	1.02853	1.00435	1.02484	1.08142	1.04503	1.02903	0.996062	1.00756	1.00567	1.0066	1.04452	1.04452	1.0348	1.03481	1.037	1.01891	1.01264	1.0493	1.03653			30.6	1.02523	1.02775	1.04123	1.00169	1.00697	1.02889	1.00517	1.03426	1.02743	1.04378	1.0376	1.0146	1.01186	1.02411	1.01567	1.03423	1.01681	1.05308	1.02891
	30.7	1.0295	1.00544	1.0269	1.07735	1.04269	1.02536	1.00135	1.01421	1.00567	1.01523	1.04542	1.04542	1.03588	1.03126	1.03804	1.01891	1.01156	1.05131	1.03898			30.7	1.02232	1.03272	1.03775	1.00169	1.00835	1.03004	1.00406	1.02333	1.01684	1.04205	1.03862	1.0065	1.00469	1.01853	1.01461	1.03239	1.01232	1.04935	1.02787
	30.8	1.02757	1.00544	1.0238	1.07939	1.0462	1.02781	0.997121	1.00978	1.00144	1.00314	1.03908	1.03908	1.03371	1.03215	1.03595	1.01557	1.01264	1.05131	1.04266			30.8	1.02286	1.03024	1.03659	1.00048	1.00973	1.0243	0.999599	1.02417	1.02743	1.04118	1.0376	1.00853	1.00981	1.02411	1.01567	1.03054	1.01345	1.05122	1.02683
	30.9	1.02743	1.00215	1.02794	1.08446	1.04737	1.02903	0.997121	1.01088	1.00567	1.01091	1.0418	1.0418	1.03154	1.03037	1.03595	1.01335	1.00084	1.04729	1.0353			30.9	1.02133	1.02775	1.03775	0.999275	1.00973	1.02315	1.00071	1.01324	1.02037	1.04464	1.03555	1.00853	1.00674	1.02318	1.01567	1.02592	1.01345	1.04935	1.02891
	31	1.02842	1.00215	1.02277	1.07939	1.04386	1.02781	0.995004	1.01088	1.00673	1.01091	1.04452	1.04452	1.03263	1.03037	1.04014	1.02002	1.01049	1.05031	1.03898			31	1.02182	1.02775	1.03659	1.00169	1.00973	1.022	1.00071	1.0166	1.0239	1.03858	1.0376	1.00954	1.00879	1.02225	1.01567	1.02961	1.01345	1.04842	1.02995
	31.1	1.02885	1.00544	1.0176	1.0804	1.04386	1.02536	0.993945	1.01088	1.00673	1.0135	1.04452	1.04452	1.0348	1.0437	1.04223	1.0178	1.01264	1.04729	1.03408			31.1	1.02182	1.03024	1.03775	0.998067	1.01386	1.01971	0.999599	1.01828	1.01861	1.04118	1.04067	1.00954	1.00674	1.02225	1.01143	1.02961	1.01008	1.05215	1.03307
	31.2	1.0301	1.00215	1.0269	1.08243	1.04503	1.02413	0.998179	1.01421	1.01203	1.01954	1.04452	1.04452	1.03046	1.03926	1.04119	1.01891	1.00942	1.05231	1.03653			31.2	1.02258	1.03272	1.03543	1.00048	1.00835	1.01856	0.998484	1.01071	1.0239	1.03858	1.04169	1.01055	1.01493	1.02411	1.01249	1.02961	1.01569	1.05495	1.03515
	31.3	1.03042	1.00105	1.02484	1.08446	1.04737	1.03148	0.999238	1.01754	1.00779	1.00832	1.04995	1.04995	1.03046	1.03748	1.04119	1.02113	1.00942	1.0493	1.03653			31.3	1.02205	1.029	1.03427	1.00048	1.00973	1.01741	0.995141	1.02164	1.01949	1.04291	1.04373	1.01156	1.00674	1.02318	1.00931	1.02684	1.01569	1.05775	1.03203
	31.4	1.029	1.00105	1.03103	1.07939	1.04503	1.02536	0.991828	1.01088	1.00991	1.01609	1.0427	1.0427	1.03154	1.04104	1.03909	1.02113	1.01264	1.04529	1.0353			31.4	1.02228	1.02775	1.03312	0.996858	1.01524	1.01856	0.996256	1.01828	1.02479	1.04464	1.04578	1.01561	1.00674	1.02411	1.00719	1.02776	1.01232	1.05402	1.03203
	31.5	1.02996	0.999956	1.03	1.08243	1.04386	1.02658	0.995004	1.0131	1.00356	1.01264	1.04723	1.04723	1.03154	1.04548	1.04223	1.02225	1.01264	1.0483	1.0353			31.5	1.02288	1.02775	1.02964	1.00048	1.00973	1.02085	0.99737	1.01912	1.02302	1.04205	1.04578	1.00954	1.00981	1.0297	1.01355	1.02776	1.01457	1.05495	1.03619
	31.6	1.02862	0.997761	1.02794	1.08243	1.04152	1.02413	0.995004	1.0131	1.00462	1.01264	1.03818	1.03818	1.03154	1.04637	1.04223	1.02113	1.01156	1.05031	1.03653			31.6	1.02166	1.02527	1.03659	0.999275	1.00973	1.01971	0.995141	1.01828	1.02567	1.04118	1.0376	1.0146	1.00879	1.02411	1.01461	1.02869	1.00783	1.05495	1.02787
	31.7	1.0297	1.00215	1.02794	1.08548	1.03918	1.02903	0.993945	1.01421	1.00779	1.01437	1.04361	1.04361	1.02395	1.0357	1.04747	1.0267	1.01156	1.05131	1.03653			31.7	1.02294	1.03148	1.0308	1.00169	1.00973	1.01856	0.992913	1.01492	1.01684	1.04118	1.04373	1.01663	1.01288	1.02225	1.01567	1.03054	1.01569	1.06335	1.03411
	31.8	1.02905	1.00435	1.0331	1.08446	1.03918	1.02781	0.996062	1.0131	1.00991	1.01005	1.04361	1.04361	1.03154	1.04015	1.03909	1.01446	1.01156	1.04428	1.03653			31.8	1.02228	1.02651	1.0308	1.00048	1.01248	1.03004	0.996256	1.02585	1.0292	1.03771	1.03658	1.01055	1.00264	1.02318	1.01461	1.03054	1.00896	1.05682	1.02787
	31.9	1.02825	1.00105	1.0238	1.08548	1.03918	1.03148	0.995004	1.01643	1.00567	1.00746	1.03818	1.03818	1.03154	1.03837	1.04328	1.02113	1.01049	1.05131	1.0304			31.9	1.02254	1.02775	1.03543	1.00411	1.00973	1.02085	0.998484	1.02669	1.02655	1.03512	1.03658	1.01561	1.00981	1.01387	1.01355	1.02222	1.0112	1.06709	1.03099
	32	1.02989	1.00105	1.02897	1.08548	1.03801	1.03026	0.993945	1.01754	1.01308	1.0135	1.04723	1.04723	1.02829	1.03837	1.04119	1.02225	1.01156	1.04729	1.03285			32	1.02309	1.029	1.03891	1.00048	1.01524	1.01971	1.00071	1.02164	1.02567	1.04031	1.03862	1.01359	1.00674	1.0176	1.01779	1.02499	1.01345	1.06335	1.02787
	32.1	1.03013	1.00215	1.02897	1.08345	1.03801	1.03148	0.998179	1.01754	1.01203	1.01609	1.0427	1.0427	1.03371	1.03748	1.04014	1.02002	1.01049	1.05432	1.03285			32.1	1.02166	1.02651	1.04007	0.999275	1.00835	1.01626	0.999599	1.02417	1.02743	1.03771	1.03658	1.00751	1.00264	1.01667	1.01779	1.02499	1.0112	1.06522	1.02787
	32.2	1.0306	0.996663	1.03	1.08446	1.03801	1.03026	0.997121	1.01864	1.01308	1.02041	1.04633	1.04633	1.03697	1.03481	1.04119	1.01669	1.01156	1.0493	1.03898			32.2	1.02285	1.02527	1.03775	1.00411	1.00835	1.02085	0.996256	1.01576	1.03096	1.04205	1.04067	1.01359	1.00879	1.01667	1.01885	1.02684	1.0112	1.06335	1.02995
	32.3	1.0289	0.996663	1.02484	1.08243	1.03801	1.02903	0.999238	1.01975	1.00567	1.02213	1.04633	1.04633	1.02937	1.03481	1.04014	1.01891	1.0062	1.04629	1.03408			32.3	1.02326	1.02775	1.03543	0.999275	1.00697	1.022	0.996256	1.03257	1.03096	1.04811	1.03862	1.01359	1.00981	1.01853	1.01355	1.02776	1.0112	1.06149	1.02476
	32.4	1.02923	0.998858	1.02897	1.07837	1.03333	1.02781	0.996062	1.01864	1.00885	1.01609	1.0427	1.0427	1.0348	1.04281	1.04119	1.02002	1.01371	1.0483	1.03285			32.4	1.02211	1.02403	1.04355	1.00048	1.00697	1.02315	0.998484	1.02501	1.02743	1.03945	1.0376	1.00954	1.00571	1.0176	1.01143	1.02961	1.00896	1.06429	1.02476
	32.5	1.02933	0.997761	1.03517	1.08142	1.03333	1.02781	0.998179	1.01754	1.00779	1.02386	1.04452	1.04452	1.03046	1.03837	1.04014	1.02002	1.0062	1.0493	1.03162			32.5	1.02402	1.03024	1.03891	1.00411	1.00835	1.022	0.991798	1.02921	1.03273	1.04638	1.03555	1.01258	1.01288	1.02132	1.01461	1.02869	1.01345	1.05962	1.02995
	32.6	1.02988	0.997761	1.02897	1.08446	1.03801	1.03026	0.996062	1.01643	1.00462	1.01868	1.04361	1.04361	1.03805	1.04281	1.04014	1.02002	1.01049	1.04729	1.03653			32.6	1.02281	1.02651	1.04007	1.0029	1.00973	1.02085	0.989569	1.02585	1.03008	1.04118	1.0376	1.01561	1.00879	1.01946	1.01037	1.02961	1.01008	1.06335	1.02891
	32.7	1.03082	1.00654	1.02897	1.08345	1.03684	1.02903	0.995004	1.01421	1.00991	1.02213	1.04723	1.04723	1.03263	1.03837	1.04328	1.02225	1.01264	1.04729	1.03776			32.7	1.02489	1.02651	1.03891	1.00169	1.00835	1.02774	0.99737	1.02753	1.03626	1.04724	1.03453	1.02068	1.00879	1.02132	1.01355	1.03146	1.00896	1.06709	1.02995
	32.8	1.03058	1.00215	1.03207	1.0804	1.03684	1.02903	0.998179	1.01754	1.01203	1.02213	1.03908	1.03908	1.03697	1.04104	1.04119	1.02781	1.01049	1.05031	1.03408			32.8	1.02301	1.02775	1.03775	1.0029	1.00697	1.0243	0.991798	1.03257	1.03538	1.04638	1.0376	1.01055	0.99957	1.02411	1.01355	1.03239	1.00447	1.06242	1.02372
	32.9	1.03077	1.00544	1.03	1.08446	1.03567	1.03026	0.997121	1.01532	1.01732	1.02041	1.04542	1.04542	1.0348	1.03126	1.03595	1.0178	1.01156	1.06035	1.0353			32.9	1.02345	1.02031	1.04239	0.999275	1.00973	1.02315	0.995141	1.02585	1.03185	1.04638	1.03964	1.01359	1.00981	1.02504	1.00931	1.03239	1.00559	1.06055	1.03203
	33	1.0297	1.00435	1.0269	1.08142	1.0345	1.02903	0.993945	1.01643	1.01414	1.01868	1.04723	1.04723	1.03371	1.03481	1.0349	1.02002	1.00405	1.05432	1.03898			33	1.02368	1.02403	1.04355	1.0029	1.00559	1.01971	0.992913	1.03089	1.03538	1.04118	1.03351	1.01561	1.01186	1.02132	1.00931	1.03239	1.00559	1.06429	1.03619
	33.1	1.02969	0.999956	1.03103	1.08142	1.03333	1.02903	0.997121	1.01864	1.01414	1.01609	1.04542	1.04542	1.03263	1.03392	1.03804	1.02002	1.01264	1.05031	1.0353			33.1	1.02439	1.02651	1.04471	0.99565	1.00697	1.02774	0.995141	1.03005	1.03008	1.04984	1.03453	1.01663	1.01493	1.01946	1.00719	1.03516	1.01008	1.06335	1.03099
	33.2	1.02957	1.00325	1.02897	1.07735	1.02865	1.02413	1.0003	1.01754	1.0152	1.01868	1.0427	1.0427	1.03154	1.03481	1.04328	1.02113	1.01264	1.05533	1.03408			33.2	1.02083	1.02651	1.04703	1.00048	1.00008	1.01856	0.987341	1.01912	1.02832	1.04638	1.03044	1.00751	1.00469	1.01853	1.01249	1.02776	1.00334	1.06335	1.03307
	33.3	1.02819	1.00105	1.02897	1.07939	1.03333	1.02658	0.997121	1.01754	1.0152	1.00919	1.04361	1.04361	1.02829	1.02681	1.03804	1.02225	1.01156	1.05332	1.03162			33.3	1.02087	1.02775	1.04471	0.999275	1.00835	1.02315	0.989569	1.01912	1.02743	1.04551	1.03351	1.00549	1.00367	1.01667	1.01355	1.03331	1.0011	1.05775	1.0258
	33.4	1.02962	1.00325	1.03103	1.08345	1.03333	1.03026	0.993945	1.01532	1.01732	1.01523	1.04452	1.04452	1.03154	1.03126	1.04014	1.02113	1.01156	1.05131	1.03408			33.4	1.02142	1.02527	1.03891	0.998067	1.00284	1.02315	0.987341	1.01912	1.02567	1.04464	1.03658	1.00954	1.01186	1.02132	1.01461	1.03146	1.00559	1.05869	1.03099
	33.5	1.02949	1.00544	1.02587	1.08852	1.0345	1.03148	0.999238	1.01754	1.01414	1.01696	1.04361	1.04361	1.03371	1.03126	1.037	1.02002	1.00727	1.05031	1.0304			33.5	1.02317	1.02279	1.04355	0.999275	1.00422	1.022	0.992913	1.02753	1.03626	1.0585	1.03658	1.01156	1.00571	1.01387	1.01143	1.03146	1.00671	1.05962	1.03307
	33.6	1.03018	1.00325	1.02897	1.08243	1.03333	1.02903	0.999238	1.02197	1.01732	1.02041	1.04361	1.04361	1.03371	1.0357	1.04119	1.02113	1.01371	1.03926	1.0353			33.6	1.02369	1.02403	1.04703	0.99565	1.00559	1.01741	0.991798	1.02417	1.03273	1.05071	1.03453	1.01359	1.01084	1.0176	1.01249	1.03701	1.01008	1.06709	1.03411
	33.7	1.03036	1.00215	1.03	1.08446	1.03333	1.03026	1.0003	1.02086	1.01414	1.01523	1.05086	1.05086	1.03154	1.03126	1.037	1.02225	1.00835	1.05332	1.0304			33.7	1.02213	1.02651	1.04007	0.99565	1.00146	1.01511	0.990684	1.01912	1.03008	1.04811	1.03862	1.01966	1.01186	1.02318	1.01249	1.03054	1.00559	1.05869	1.03099
	33.8	1.03077	1.00435	1.02587	1.08243	1.03801	1.03026	1.00453	1.02419	1.01097	1.01523	1.04814	1.04814	1.03805	1.03926	1.03385	1.01557	1.01156	1.0493	1.03408			33.8	1.0237	1.02403	1.04587	0.994442	1.00422	1.02085	0.994027	1.01744	1.02832	1.0585	1.03964	1.01764	1.00879	1.02132	1.01779	1.03608	1.00334	1.06429	1.02995
	33.9	1.02981	1.00325	1.03	1.08649	1.0345	1.03026	0.998179	1.01643	1.01097	1.01954	1.0427	1.0427	1.04131	1.03659	1.0349	1.02225	1.00942	1.04428	1.03285			33.9	1.02425	1.02651	1.04587	0.994442	1.00146	1.02085	0.987341	1.02417	1.03891	1.04984	1.03862	1.01663	1.00879	1.02877	1.01885	1.03423	1.00783	1.06242	1.03099
	34	1.02902	0.998858	1.0331	1.08548	1.03684	1.03026	0.996062	1.01421	1.00991	1.01609	1.04452	1.04452	1.0348	1.03392	1.03909	1.01224	1.00835	1.05131	1.03285			34	1.02296	1.02775	1.04471	0.998067	1.00146	1.02774	0.985112	1.02501	1.0292	1.04291	1.04271	1.01764	1.00674	1.01667	1.01355	1.03516	1.00447	1.06242	1.03203
	34.1	1.02645	0.997761	1.02794	1.06618	1.02163	1.01678	0.999238	1.01532	1.00673	1.0135	1.04361	1.04361	1.03588	1.04193	1.03909	1.01446	1.00835	1.05131	1.03285			34.1	1.02375	1.02651	1.04587	0.999275	1.00284	1.02889	0.987341	1.02837	1.04156	1.05071	1.04169	1.00954	1.00469	1.01853	1.01143	1.03054	1.00783	1.05775	1.03411
	34.2	1.02789	0.997761	1.03	1.06415	1.02397	1.01678	0.999238	1.01754	1.01097	1.0135	1.04452	1.04452	1.03588	1.04459	1.04119	1.02002	1.01371	1.0483	1.0353			34.2	1.02283	1.02651	1.04239	0.993233	1.00422	1.0243	0.985112	1.02753	1.03096	1.04291	1.04169	1.01359	1.00264	1.01946	1.01567	1.03886	1.00447	1.06335	1.03411
	34.3	1.02702	0.996663	1.0331	1.07025	1.02631	1.01556	0.996062	1.0131	1.01308	1.01609	1.04089	1.04089	1.0348	1.0437	1.0349	1.01446	1.00942	1.0493	1.03776			34.3	1.02224	1.02403	1.04471	0.996858	0.998705	1.01856	0.983997	1.02585	1.0292	1.04464	1.0376	1.01156	1.00162	1.02877	1.01885	1.03146	1.00783	1.06709	1.02891
	34.4	1.02775	0.995566	1.03	1.07532	1.02865	1.02046	1.00135	1.00978	1.00885	1.0135	1.03636	1.03636	1.04673	1.04637	1.03281	1.01669	1.00942	1.05231	1.03898			34.4	1.02267	1.02527	1.04239	0.996858	1.00284	1.01856	0.980654	1.01576	1.03449	1.05157	1.03862	1.01055	1.00879	1.02225	1.01885	1.03608	1.01008	1.06242	1.03203
	34.5	1.02886	0.999956	1.0269	1.07837	1.03099	1.02046	1.00347	1.01975	1.00779	1.01868	1.04361	1.04361	1.04456	1.04015	1.03281	1.01557	1.01264	1.04127	1.03898			34.5	1.02252	1.02527	1.04703	0.99565	1.00008	1.02085	0.981769	1.0208	1.03714	1.04551	1.0376	1.01156	1.00059	1.02411	1.01779	1.03978	1.01008	1.05775	1.03203
	34.6	1.02837	0.996663	1.03103	1.07837	1.02982	1.02168	0.999238	1.01532	1.0152	1.01954	1.04905	1.04905	1.04022	1.0357	1.02966	1.01557	1.01049	1.03625	1.03776			34.6	1.02201	1.02527	1.04471	0.99565	1.00008	1.01971	0.986226	1.02585	1.0292	1.04898	1.03964	1.01258	1.00367	1.02504	1.01461	1.03146	1.00896	1.05869	1.0258
	34.7	1.03016	0.997761	1.03103	1.0804	1.03333	1.02413	1.00453	1.01754	1.01944	1.01696	1.05176	1.05176	1.04998	1.0357	1.03071	1.01669	1.0062	1.04328	1.03162			34.7	1.02132	1.02527	1.04007	0.998067	1.00146	1.02085	0.986226	1.01996	1.03273	1.04638	1.0376	1.00954	1.00571	1.02411	1.01673	1.02684	1.00334	1.05682	1.03203
	34.8	1.03014	0.997761	1.02794	1.08345	1.03099	1.02536	1.0003	1.01754	1.02155	1.02041	1.0427	1.0427	1.04998	1.03748	1.03595	1.01446	1.01264	1.04227	1.03898			34.8	1.02252	1.02155	1.04007	0.998067	1.00008	1.02085	0.990684	1.03005	1.03273	1.05157	1.04067	1.01359	1.00469	1.02691	1.01567	1.02869	1.00783	1.05588	1.0258
	34.9	1.02976	0.999956	1.03	1.0804	1.03099	1.02291	0.997121	1.01532	1.02049	1.01954	1.04542	1.04542	1.04673	1.03926	1.0349	1.0178	1.00835	1.04328	1.03776			34.9	1.02344	1.02403	1.04123	0.999275	1.00008	1.01971	0.991798	1.03257	1.03626	1.05331	1.03862	1.01258	1.00674	1.02318	1.01355	1.02961	1.00671	1.06055	1.03203
	35	1.02846	1.00105	1.02897	1.07837	1.02982	1.02046	0.998179	1.01975	1.01308	1.01868	1.04542	1.04542	1.04347	1.03481	1.0349	1.0178	1.00835	1.03725	1.03653			35	1.02206	1.02527	1.03775	0.998067	1.00284	1.01856	0.990684	1.02248	1.03538	1.04464	1.03658	1.00954	1.00367	1.02411	1.01567	1.03146	1.00783	1.06055	1.03203
