# Supplementary material for: FRET kinase sensor development reveals SnRK2/OST1 activation by ABA but not by MeJA and high CO2 during stomatal closure
Source: eLife. 2020 May 28;9:e56351. doi: 10.7554/eLife.56351 (PMC7289597; doi:10.7554/eLife.56351)
Supplement: Figure 8—figure supplement 1—source data 1. [file elife-56351-fig8-figsupp1-data1.xlsx]

## Sheet: Figure 8-figure supplement 1
Figure 8-figure supplement 1A		Normalized ratio																	Figure 8-figure supplement 1B		Normalized ratio																								Figure 8-figure supplement 1C		Normalized ratio
	Time (min)	average	Stomate_1	Stomate_2	Stomate_3	Stomate_4	Stomate_5	Stomate_6	Stomate_7	Stomate_8	Stomate_9	Stomate_10	Stomate_11	Stomate_12	Stomate_13	Stomate_14	Stomate_15			Time (min)	average	Stomate_1	Stomate_2	Stomate_3	Stomate_4	Stomate_5	Stomate_6	Stomate_7	Stomate_8	Stomate_9	Stomate_10	Stomate_11	Stomate_12	Stomate_13	Stomate_14	Stomate_15	Stomate_16	Stomate_17	Stomate_18	Stomate_19	Stomate_20	Stomate_21	Stomate_22			Time (min)	average	Stomate_1	Stomate_2
	0.1	0.997894	0.996036	1.00181	0.984095	0.99694	0.998649	0.998838	0.984123	0.99369	1.00871	1.00262	0.996012	1.00007	0.999903	1.00531	1.00161			0.1	1.00226	0.999702	0.999673	0.991388	1.00218	0.997464	1.00228	1.00109	1.0077	1.00181	0.994077	1.00191	1.00543	1.00745	1.00662	0.996566	1.00879	1.00509	0.997644	1.00196	1.00917	1.00281	1.00897			0.2	0.991302	0.989577	0.991918
	0.2	0.997694	0.998513	1.00086	0.98837	1.00208	1.00301	1.00172	0.980995	0.99369	1.00019	1.00065	0.999245	0.997003	0.995059	1.00428	0.99673			0.2	1.00104	1.00354	0.992784	0.993345	0.999288	0.990832	1.00228	1.00109	1.01333	1.00087	0.993239	1.00297	1.0016	1.00845	1.00662	0.995633	1.00265	0.998062	1.00215	1.00408	1.00718	0.998006	1.00489			0.4	0.990257	0.990748	0.995473
	0.3	0.996603	0.999339	0.998	0.98267	0.996083	0.993421	0.994036	0.985165	0.984171	1.00208	1.00065	0.999245	0.998026	0.996028	1.00223	1.00454			0.3	1.00037	0.998742	0.986757	0.990409	0.998325	1.00465	1.00149	1.00279	1.00699	0.999924	0.9924	1.00403	1.00256	1.00546	1.00847	0.995633	1.00674	0.999066	0.996517	1.0009	1.00519	0.999207	1.00183			0.6	0.993645	0.997775	0.999028
	0.4	0.996574	0.996036	0.998952	0.98552	0.997797	1.00039	1.00076	0.988293	0.986075	1.00303	0.999673	0.99709	1.00007	0.999903	1.00634	1.00161			0.4	0.999355	1.00162	0.993645	0.988452	0.999288	0.99028	0.996756	0.993423	0.999951	0.993309	0.999111	1.00085	1.0016	1.00546	1.00294	0.998432	1.00674	1.00308	0.996517	0.999841	1.00817	1.00041	1.00591			0.8	0.994246	0.995433	1.00021
	0.5	0.996949	0.996862	0.996096	0.989796	0.994368	0.994292	0.996917	0.988293	0.984171	1.00114	1.00065	1.00032	1.00212	0.996028	1.00428	1.00161			0.5	0.999884	1.00738	0.998812	0.990409	0.996399	1.00907	0.994389	0.994275	0.995726	0.996144	0.994077	1.00191	1.00448	1.00546	1.00386	0.998432	1.00674	1.00208	0.997644	0.998782	1.00718	0.994403	0.999796			1	0.992239	0.993091	0.996658
	0.6	0.997544	0.998513	1.00276	0.98837	0.99694	0.997778	0.996917	0.99142	0.990834	1.00493	1.00164	1.00032	1.00007	0.999903	1.00736	1.00161			0.6	0.999734	0.998742	0.996229	0.992366	1.00121	0.995253	0.999124	0.999387	1.01051	0.998034	0.994077	0.999788	1.00448	1.01043	1.00662	0.995633	1.00265	0.99505	0.993135	0.999841	1.00618	0.995604	0.999796			1.2	0.993855	0.996604	0.999028
	0.7	0.997637	0.997687	0.997048	0.98552	1.00208	1.00213	1.0046	0.98725	0.986075	0.999242	0.995749	0.999245	0.999048	0.990214	1.00223	1.00161			0.7	0.999101	0.998742	0.991923	0.991388	1.00506	0.980885	0.996756	0.996831	1.00277	0.995199	0.999111	1.00297	1.00064	1.01441	1.00662	0.995633	1.00572	0.999066	0.994262	0.999841	1.00718	0.994403	1.00082			1.4	0.996696	0.995433	1.00021
	0.8	0.995972	0.998513	1.00086	0.984095	0.994368	0.994292	0.991155	0.98725	0.986075	0.999242	1.00065	0.998168	0.998026	0.997965	0.998121	1.00063			0.8	1.00028	1.00162	0.994507	0.988452	1.00121	1.00575	1.00228	0.997683	1.00347	1.0056	0.997433	1.00191	1.00064	1.00845	1.0011	0.995633	1.00367	0.999066	0.996517	1.0009	1.00718	0.994403	0.998777			1.6	0.995446	0.994262	0.995473
	0.9	0.99579	0.999339	1.00086	0.98552	0.996083	0.997778	0.997877	0.986208	0.987979	0.995454	1.00262	1.00032	1.00007	0.992152	1.00531	0.99673			0.9	0.999594	1.00258	1.00139	0.993345	1.00121	0.995253	0.996756	0.999387	0.999247	1.00181	0.999111	1.00297	1.00352	1.00546	1.00294	0.993767	0.999581	0.997058	0.996517	0.998782	1.00718	0.994403	0.998777			1.8	0.997275	0.996604	0.997843
	1	0.995935	0.996036	0.994191	0.983382	0.998654	0.999521	0.996917	0.989335	0.98893	0.992612	0.997711	0.999245	0.999048	0.995059	1.00736	0.995753			1	1.00037	1.00066	0.99709	0.991388	1.00218	1.01238	1.00386	1.0045	0.998542	0.997089	0.991561	0.999788	1.00639	1.00745	1.00202	0.996566	0.999581	1.00007	0.998771	1.00196	1.00319	0.993203	0.999796			2	0.995759	0.998946	0.994288
	1.1	0.995313	1.00347	1.00562	0.973406	0.992654	0.991678	0.990194	0.986208	0.99369	0.999242	0.999673	0.994934	0.995981	0.997965	1.00223	0.998682			1.1	1.00118	1.00162	0.992784	0.990409	0.999288	1.01736	1.01017	1.00194	1.00699	0.996144	1.00414	0.996607	1.0016	1.00745	1.00202	0.996566	1.00265	1.00107	0.998771	1.00196	1.0022	0.994403	0.999796			2.2	0.997742	0.996604	1.00021
	1.2	0.994169	0.998513	0.998	0.974119	0.99694	0.992549	0.998838	0.98725	0.992738	0.993559	0.991825	0.992778	0.999048	0.992152	1.00223	0.98892			1.2	0.999229	1.00162	0.999673	0.990409	1.00218	0.99028	1.00623	1.00109	0.993613	0.997089	0.997433	0.998728	1.00735	1.0005	1.00294	0.997499	1.00163	1.00107	0.997644	1.0009	1.00419	0.993203	0.997758			2.4	0.999706	1.00129	1.0014
	1.3	0.994462	1.00182	0.997048	0.979819	0.992654	0.989064	0.993075	0.992463	1.00035	0.998295	1.00065	0.999245	0.99189	0.995059	1.00428	0.998682			1.3	0.99994	0.997782	0.985035	0.987473	0.998325	1.00686	0.997546	0.996831	0.99643	0.999924	0.99995	1.00191	1.01502	0.99851	1.00386	0.999365	1.00367	1.00007	1.00328	1.00726	1.00419	0.995604	0.999796			2.6	0.99911	0.994262	0.997843
	1.4	0.99604	0.998513	0.998	0.993359	0.996083	0.995164	0.997877	0.990378	0.991786	0.998295	0.995749	1.00032	0.999048	0.99409	1.00531	0.992825			1.4	1.00002	1.00258	0.997951	0.99726	1.00218	0.994148	0.999913	0.997683	0.994317	0.995199	0.997433	0.994487	1.01023	1.0005	1.00294	0.999365	1.00367	1.00409	0.999899	1.0062	1.00519	0.994403	1.00082			2.8	0.997341	1.00129	1.00021
	1.5	0.997463	1.00017	1.00371	0.991221	0.999511	1.00039	0.996917	0.989335	0.991786	0.999242	0.991825	0.999245	1.00416	1.00959	1.00326	0.99673			1.5	0.999554	0.999702	0.997951	0.992366	1.00121	1.00409	0.99281	0.993423	0.987979	0.999924	0.999111	0.995547	1.01023	1.00248	1.00478	0.998432	1.00367	1.00107	0.997644	1.00514	1.00618	0.995604	1.00082			3	0.99864	1.00129	1.0014
	1.6	0.998592	1.00512	0.999905	0.984807	0.999511	1.00301	1.00172	0.990378	0.995593	1.00019	0.992806	1.00248	1.00416	0.997965	1.00531	0.997706			1.6	1.00086	1.00066	0.995368	0.995302	1.00025	1.00244	1.00781	1.00365	0.998542	0.999924	1.00247	0.995547	1.01119	0.99851	1.00478	0.999365	1.00367	0.999066	0.997644	1.0009	1.00419	0.996805	1.00082			3.2	0.999347	0.997775	1.00021
	1.7	0.997629	0.998513	0.998952	0.991933	0.997797	1.00126	0.998838	0.98725	0.991786	1.00114	0.994768	1.00032	1.00416	0.986339	1.00428	0.990872			1.7	1.00044	0.996821	1.00312	0.99726	1.00218	1.00575	1.00228	0.998535	1.00347	1.00087	1.00331	0.998728	1.00352	1.0005	0.995583	0.997499	1.0006	0.996054	1.00215	1.00514	1.00319	0.994403	0.998777			3.4	0.9988	0.997775	0.997843
	1.8	0.997576	1.00347	0.995143	0.995496	1.00208	1.00126	1.00076	0.989335	0.98893	1.00208	0.99673	1.0014	1.00109	0.993121	1.01044	0.997706			1.8	0.998006	0.994901	0.995368	0.990409	0.995437	1.0052	1.0007	1.00535	0.995021	0.995199	0.999111	0.997668	1.01214	0.994536	0.990983	0.997499	1.00265	0.999066	0.995389	1.00196	1.0012	0.9896	0.996739			3.6	1.00019	0.997775	1.00021
	1.9	0.998628	0.998513	0.992286	1.00547	1.00037	1.00213	0.997877	0.994548	0.995593	1.00398	1.00164	0.996012	1.00416	0.992152	1.00223	0.992825			1.9	0.999527	1.00066	1.0057	0.995302	0.998325	1.00686	0.999124	0.996831	0.987979	0.994254	0.99995	0.995547	1.01598	0.995529	0.998344	0.996566	0.998557	0.99505	1.00215	1.00726	1.0022	0.995604	1.00183			3.8	1.00124	1.00012	1.0014
	2	0.997366	0.998513	0.999905	0.984807	0.995225	0.996906	0.993075	0.99142	0.992738	1.00587	1.00164	0.996012	0.998026	0.993121	0.999148	0.994777			2	0.999929	0.994901	0.99709	0.993345	0.999288	0.99028	0.999913	1.00365	1.00206	0.999924	0.99995	0.999788	1.01214	1.00447	1.00018	1.0003	1.00572	0.999066	0.998771	1.00196	0.999214	0.995604	1.00082			4	1.00126	1.00363	1.00258
	2.1	0.996003	0.996036	0.992286	0.98552	0.999511	0.997778	0.998838	0.98725	0.992738	1.00019	0.994768	0.994934	0.997003	0.998934	1.00736	0.995753			2.1	0.998814	1.00162	1.00656	1.0002	0.997362	1.00465	0.995178	0.998535	0.987979	0.998034	0.99995	0.996607	1.00639	1.00149	0.996503	0.9947	0.998557	0.990029	0.997644	1.00408	1.00021	0.996805	1.00082			4.2	1.00099	0.997775	0.999028
	2.2	0.996967	0.996862	0.998	0.994784	0.998654	1.00301	0.997877	0.992463	0.991786	1.00208	0.998692	0.992778	1.00212	0.999903	1.00634	0.994777			2.2	0.998806	1.00258	0.993645	0.999217	0.997362	1.00354	1.0007	0.999387	0.992909	0.995199	0.99995	0.996607	1.01406	0.991555	0.992823	0.999365	1.00265	0.997058	0.999899	1.00302	1.00021	0.993203	0.998777			4.4	1.0001	1.00246	1.00021
	2.3	0.998824	0.997687	0.998	0.998347	1.00123	1.00475	0.999798	0.99559	1.00035	1.00114	0.999673	1.00032	0.995981	1.00087	1.0012	0.999658			2.3	1.00004	0.999702	0.987618	0.995302	0.994474	1.01846	0.999913	0.997683	1.00065	0.997089	1.00079	0.994487	1.01023	1.00646	1.00202	0.996566	1.0047	0.994046	0.999899	1.0062	0.999214	0.995604	0.999796			4.6	1.00491	1.00363	1.00258
	2.4	0.999159	0.996036	1.00181	0.992646	1.00208	1.00736	0.995957	0.993505	1.00226	1.00208	1.00065	0.992778	1.00416	1.00087	0.997094	0.990872			2.4	1.00129	1.00354	1.00312	0.998238	1.00218	1.01073	0.995967	0.999387	1.00347	0.996144	1.00498	1.00191	1.0131	0.99851	0.995583	0.997499	1.0047	0.99505	1.00215	1.00302	0.998219	0.998006	1.00285			4.8	1.0038	1.00129	1.0014
	2.5	0.998815	1.00017	1.00276	0.998347	1.00123	1.00736	1.00076	0.993505	0.998449	0.998295	1.00065	0.994934	0.994958	0.996996	0.999148	0.99673			2.5	1.00003	1.00354	0.996229	1.00117	1.00314	1.01238	0.996756	0.996831	0.999247	0.996144	1.00079	0.996607	1.00735	1.00149	0.997424	0.995633	1.0006	0.992038	0.998771	1.00196	1.00519	0.995604	1.00183			5	1.00247	1.00246	1.00377
	2.6	0.998518	0.998513	1.00276	0.986233	0.99694	0.998649	0.996917	0.993505	0.9994	0.998295	1.00164	1.00032	1.00007	0.996996	1.00428	0.99673			2.6	0.999123	1.00162	0.985896	0.994324	0.997362	1.01017	1.0007	0.998535	1.00981	0.995199	0.999111	0.996607	1.00831	1.00248	0.995583	0.999365	1.00367	0.997058	0.993135	0.998782	1.0022	0.992002	0.998777			5.2	1.00227	0.997775	1.0014
	2.7	0.9989	0.996036	1.00086	0.999059	1.00208	1.00126	0.997877	0.994548	1.00035	1.00208	1.00262	0.998168	1.00212	1.00184	0.999148	0.997706			2.7	0.999875	0.997782	0.996229	0.998238	0.999288	0.996911	0.999913	0.997683	1.00347	0.998034	0.998272	0.998728	1.01119	1.00348	0.995583	1.00216	1.00163	0.996054	1.00103	1.0009	1.0012	0.995604	1.00387			5.4	1.00192	1.00012	0.999028
	2.8	0.997784	0.994384	0.994191	0.98837	0.99694	0.990807	0.994996	0.988293	0.994641	0.999242	0.999673	1.00032	1.00109	0.996996	0.999148	0.998682			2.8	0.998568	1.00066	1.00053	0.99726	0.995437	0.993595	0.995178	0.993423	0.999951	0.992364	0.999111	0.996607	1.01119	1.00745	0.996503	1.00216	1.00367	0.997058	0.993135	0.995605	1.0022	0.995604	0.999796			5.6	1.00116	0.997775	0.996658
	2.9	0.997161	0.999339	0.997048	0.989796	0.997797	1.00213	0.997877	0.993505	1.00226	1.00208	0.999673	0.998168	1.00416	0.992152	1.00531	0.995753			2.9	0.999108	1.00066	0.998812	1.0002	1.00025	1.01128	1.00149	0.998535	1.0077	0.994254	0.999111	0.999788	1.00448	1.00248	0.992823	0.996566	0.994465	0.992038	0.999899	0.999841	1.00021	0.990801	0.9947			5.8	1.00079	1.00012	0.996658
	3	0.998153	0.999339	1.00181	0.990508	0.998654	0.999521	1.00076	0.994548	1.00226	0.997348	0.999673	0.998168	0.997003	0.995059	0.998121	0.994777			3	1.00025	1.00642	0.99709	0.999217	1.00121	1.0052	0.996756	0.998535	1.00629	1.00181	1.00079	0.996607	1.01119	0.997516	0.990983	1.00123	0.999581	0.994046	1.00441	1.00302	1.0012	0.995604	0.996739			6	1.00228	1.00246	0.999028
	3.1	0.998442	0.99521	1.00181	0.991933	0.999511	1.00301	0.999798	0.99142	0.998449	1.00208	1.00262	0.999245	0.999048	1.00572	0.999148	0.99673			3.1	0.999355	1.00354	0.995368	1.00117	1.00506	0.976464	0.998335	0.997683	0.998542	0.999924	0.999111	0.999788	1.01023	1.00149	0.990983	1.0003	1.0047	0.999066	0.997644	0.997723	1.00319	1.00161	1.00387			6.2	1.00055	1.00129	0.999028
	3.2	0.99866	0.993558	0.997048	0.993359	0.997797	0.993421	1.00076	0.99559	1.00226	1.00019	1.0036	1.00032	1.00212	0.995059	1.00326	0.995753			3.2	0.999922	1.01123	1.00226	1.00215	1.0041	0.993043	0.9936	0.997683	1.00136	0.998034	0.996594	0.995547	1.01023	0.999503	0.991903	1.00123	1.0006	0.99505	0.998771	0.998782	1.00419	1.00161	1.00082			6.4	1.00376	1.00363	1.00377
	3.3	0.999417	1.00182	1.00371	0.991933	1.00551	1.00213	1.0094	0.996633	0.9994	1.00303	1.00458	0.99709	1.00212	0.996028	1.00223	0.992825			3.3	0.998551	1.00162	0.999673	0.999217	0.999288	0.974254	0.995967	1.00024	1.00136	1.00087	1.00163	0.994487	1.0131	1.00149	0.991903	1.00123	0.999581	0.998062	0.999899	1.0009	1.0022	0.994403	0.996739			6.6	1.00325	1.00363	1.0014
	3.4	1.00019	1.00099	0.999905	0.996209	1.00037	0.999521	1.00076	0.996633	1.00226	1.00114	1.00556	0.998168	0.999048	0.999903	0.999148	0.997706			3.4	0.998399	1.00066	0.991062	0.995302	1.00025	0.979227	0.987286	0.996831	1.00065	0.998979	0.995755	0.997668	1.01214	1.00447	0.994663	1.00216	1.0047	1.00007	1.00103	0.999841	1.00319	0.998006	1.00082			6.8	1.00105	1.00012	0.999028
	3.5	0.999216	0.999339	1.00086	0.992646	0.999511	0.996906	1.00172	0.996633	0.9994	1.00114	1.00262	0.998168	1.00212	0.995059	1.0012	0.991848			3.5	0.999955	1.00835	1.00742	1.0002	1.00506	0.978122	0.99281	1.00279	1.00558	0.998979	1.00331	1.00085	0.99585	1.00646	0.995583	0.999365	0.999581	0.997058	1.00103	0.998782	1.00319	0.996805	1.00183			7	1.00049	1.00129	0.999028
	3.6	1.00001	1.00347	1.00562	0.997634	1.00294	1.00039	0.999798	0.996633	0.9994	1.00493	1.00458	0.99709	1.00212	1.01153	1.00326	0.991848			3.6	0.998442	1.00738	0.999673	0.99726	1.00699	0.97978	0.995178	1.00024	0.999247	0.998034	1.00079	1.00085	0.997767	0.999503	0.990983	0.999365	1.00163	0.997058	0.997644	0.998782	1.00319	0.995604	0.998777			7.2	1.00346	1.0048	1.00377
	3.7	1.00076	1.00099	1.00276	0.992646	1.00294	0.996906	1.00172	0.998718	0.9994	1.00398	1.0036	0.996012	0.998026	0.999903	1.00531	0.998682			3.7	0.998236	1.00546	0.998812	1.00117	1.0041	0.977017	0.989654	0.996831	0.995021	0.999924	0.998272	1.00191	0.996808	1.00248	0.996503	0.999365	1.00163	0.998062	0.998771	0.998782	1.00419	0.995604	1.00082			7.4	1.00373	1.00012	1.0014
	3.8	1.00043	1.00182	0.998952	0.994071	1.00123	1.00213	1.00268	0.998718	0.998449	0.999242	1.00164	1.0014	1.00314	1.00669	1.00428	0.99673			3.8	0.998626	1.00258	1.00226	0.999217	0.999288	0.985306	0.999124	1.00279	0.990796	0.998034	0.996594	1.00297	0.996808	1.00149	0.995583	1.00216	0.999581	0.998062	1.00328	1.0009	1.00419	0.992002	0.996739			7.6	1.00319	1.00363	1.00021
	3.9	0.999694	0.997687	0.998952	0.987658	1.00208	0.999521	0.997877	0.996633	0.995593	0.997348	0.998692	1.00248	1.00416	0.996996	1.00531	0.998682			3.9	0.999883	0.999702	0.994507	0.998238	0.999288	1.00741	1.0007	1.00279	0.989388	0.998034	0.996594	1.00615	0.994891	1.00447	0.995583	1.00216	1.0047	1.00007	0.999899	0.998782	1.00319	0.998006	1.00285			7.8	0.998536	0.997775	0.996658
	4	0.999186	0.996036	0.997048	0.994071	1.0038	0.996906	0.996917	1.00497	0.9994	1.00114	1.00262	0.998168	1.00416	1.00281	1.00017	0.997706			4	1.00017	1.00931	1.01173	1.00313	1.0041	1.00631	0.995178	0.998535	0.997134	0.998034	0.99995	1.00191	0.999684	0.995529	0.994663	0.998432	0.998557	0.996054	1.00103	0.996664	1.00021	0.996805	1.00082			8	1.00278	1.00246	1.00021
	4.1	1.00084	0.991906	0.998952	0.995496	1.00894	1.00301	1.00748	1.00185	1.0013	1.00114	1.00458	1.00356	1.00416	1.00184	1.00839	0.99673			4.1	1.0003	1.00162	0.999673	0.998238	0.999288	1.00796	1.00386	1.00194	0.990796	0.998979	0.998272	1.00509	1.00352	1.00149	0.999264	1.0031	1.00163	0.996054	1.00215	0.996664	0.998219	0.998006	1.00082			8.2	1.00303	1.00597	1.00495
	4.2	1.00165	0.996862	1.00276	1.00048	1.00894	1.00388	1.00268	1.00497	0.998449	1.00019	1.00164	0.999245	1.00212	0.997965	1.00223	0.997706			4.2	1.00023	1.00642	1.00053	0.998238	0.997362	1.01017	1.0007	1.00279	0.990092	0.998034	0.999111	1.00191	1.00256	1.00248	1.00386	1.00216	1.00572	0.997058	0.999899	0.995605	0.997223	0.994403	0.998777			8.4	1.00428	1.00363	0.996658
	4.3	0.999723	0.99521	0.996096	0.991933	0.999511	0.991678	0.991155	1.00393	1.00226	1.00208	1.00164	1.0014	1.00007	1.00281	0.996067	0.995753			4.3	0.99991	1.0045	0.996229	0.999217	1.00025	1.02067	0.998335	0.999387	0.984459	0.995199	0.994077	1.00297	1.00735	1.0005	1.0011	0.999365	0.998557	0.999066	0.998771	0.997723	0.998219	0.999207	1.00285			8.6	1.00249	1.00246	1.0014
	4.4	0.999384	0.999339	0.998	1.00619	1.00723	1.00039	1.00364	1.00602	1.00701	1.00398	0.998692	1.0014	0.999048	0.991183	0.994013	0.993801			4.4	1.00029	0.999702	0.999673	1.0002	0.997362	1.01073	1.0007	1.00365	0.999247	0.997089	1.00079	1.00191	0.996808	1.00149	1.0057	0.998432	1.00163	1.00107	0.999899	0.995605	0.998219	0.995604	1.00082			8.8	1.00206	1.00012	1.00377
	4.5	1.00166	0.999339	1.00657	1.00904	1.00637	1.00649	1.00268	0.99976	1.00511	1.00208	1.0036	1.00032	0.999048	1.00669	0.99504	0.997706			4.5	1.00102	1.00642	1.00139	1.00117	1.00218	1.00852	1.00465	1.00535	0.99643	0.993309	0.994077	1.00615	1.00064	0.997516	1.0011	1.00123	1.00367	1.00208	1.00103	0.999841	0.998219	0.995604	1.00183			9	1.00397	1.00714	1.00021
	4.6	1.00119	0.997687	1.00657	1.00476	1.00037	0.995164	0.997877	0.996633	0.997497	0.999242	1.00065	1.0014	1.00621	0.999903	0.996067	0.995753			4.6	0.999438	1.00546	1.00742	0.999217	1.00603	1.00575	0.998335	1.00024	0.992205	0.994254	0.994916	1.00191	0.998725	0.999503	1.0011	1.0003	0.999581	1.00007	0.994262	0.993486	0.996228	0.996805	1.00183			9.2	1.00265	1.00363	1.00258
	4.7	1.00039	0.996036	1.00752	0.994071	0.998654	1.00562	1.00076	0.99976	1.00511	1.00398	1.00262	1.00032	0.997003	1.00475	0.999148	1.00063			4.7	1.00053	1.00642	1.00398	1.00117	1.00506	0.996358	1.00386	0.997683	0.995021	0.998034	0.995755	1.00297	1.00256	1.0005	0.997424	1.00216	1.0047	1.00107	1.00103	0.999841	0.998219	0.998006	0.999796			9.4	1.00016	1.00363	1.00495
	4.8	1.00062	0.999339	1.00181	0.999059	1.00037	0.999521	0.998838	0.99559	0.9994	1.00303	0.999673	0.999245	0.999048	1.00475	1.00531	0.997706			4.8	1.00002	1.00642	1.00312	1.0002	1.00506	0.996911	1.00781	1.00194	0.99643	0.994254	0.994916	1.00509	1.00448	0.999503	0.995583	0.998432	0.997534	1.00007	0.999899	0.998782	0.996228	0.998006	0.999796			9.6	1.00203	1.00363	1.00495
	4.9	1.00058	1.00099	0.999905	1.00547	1.00037	1.00301	0.995957	1.0008	0.998449	1.00114	1.00065	1.0014	1.00212	1.00378	1.00017	1.00063			4.9	1.00088	1.00546	1.00914	1.0002	1.00603	0.997464	1.00465	0.997683	0.9915	0.995199	0.995755	1.00403	0.999684	1.00546	0.999264	0.999365	0.997534	1.00107	0.998771	0.999841	1.00021	1.00521	1.00591			9.8	1.00224	1.00363	1.00377
	5	1.00063	0.996862	1.00086	0.996209	0.997797	1.00039	0.998838	0.997675	0.998449	0.997348	1.00164	1.0014	1.00109	1.01153	1.00428	0.999658			5	0.999448	1.00066	0.99709	1.00117	1.00121	1.00078	0.999124	0.999387	0.994317	0.998979	0.991561	1.00509	1.0016	1.00248	1.00018	1.0003	0.999581	0.999066	0.998771	0.999841	0.994238	1.00161	1.00082			10	1.00149	1.00129	0.999028
	5.1	1.00091	0.997687	1.00467	1.00476	0.999511	1.00126	1.00076	1.00185	1.00511	0.999242	1.00262	0.999245	1.00314	1.00184	0.998121	1.00356			5.1	0.999951	1.00354	1.00053	1.00411	1.00025	0.997464	1.00386	0.999387	0.992205	0.994254	0.994077	1.00509	0.998725	1.00348	0.999264	1.00683	1.00163	1.00208	0.993135	0.993486	0.995233	1.00641	1.00387			10.2	1.00205	1.00597	1.0014
	5.2	1.00147	1.00182	1.00371	1.00405	1.00294	0.998649	0.998838	1.00289	1.00035	0.998295	0.995749	1.00464	0.995981	1.00184	1.00942	1.00161			5.2	1.00008	1.00258	1.00053	1.0002	1.00699	0.996358	1.00149	0.998535	0.992205	0.995199	0.994916	1.00615	0.997767	1.00248	1.00018	1.00496	0.999581	1.00208	0.996517	0.997723	0.998219	1.00521	1.00183			10.4	1.00423	1.00714	1.00377
	5.3	1.00087	0.99521	0.991334	1.00333	0.997797	1.00126	0.997877	1.00393	1.00416	1.00019	0.998692	1.00464	1.00314	0.999903	1.00326	1.00063			5.3	0.999123	1.00258	0.997951	1.0002	1.00121	0.99249	1.00149	0.995979	0.990092	1.00087	1.00163	1.00085	0.99585	0.99851	1.00018	1.00403	1.00265	1.00409	0.999899	0.998782	0.994238	1.00041	0.996739			10.6	1.00043	0.998946	0.995473
	5.4	1.00115	1.00099	1.00467	1.00761	1.00465	1.00039	0.999798	1.00289	1.00416	1.00208	0.998692	1.00248	0.997003	0.996996	1.00428	1.00259			5.4	1.00012	1.0045	1.0057	1.00215	1.00025	0.99249	0.996756	1.00024	0.999247	1.00276	1.00582	1.00403	0.991057	0.996523	1.0011	1.0031	0.999581	1.00107	0.999899	1.00196	0.998219	1.00041	0.99572			10.8	1.00264	1.00246	0.995473
	5.5	1.00009	0.996862	0.996096	1.00048	0.993511	0.995164	0.997877	1.0008	1.00606	0.999242	0.999673	0.996012	0.993935	0.996028	0.999148	1.00259			5.5	0.999042	1.00642	0.999673	1.00117	0.997362	0.985859	1.00544	0.998535	0.987979	1.00654	1.00331	1.00615	0.994891	0.994536	0.992823	1.00216	0.997534	1.00208	0.998771	0.999841	0.995233	1.00281	0.999796			11	1.00298	1.00363	1.00377
	5.6	0.999204	1.00264	0.998952	1.00191	0.995225	0.996035	0.995957	1.00185	1.00321	1.00208	0.998692	1.00356	0.995981	1.00087	1.00017	1.00552			5.6	0.99945	0.99394	1.00053	1.00215	0.998325	0.996358	0.997546	0.995127	0.995726	1.0037	1.00331	1.00191	0.996808	0.992548	0.994663	1.00496	1.00265	1.00509	0.997644	0.999841	0.999214	1.00401	1.00183			11.2	1.00232	1.00363	1.00021
	5.7	1.00037	0.999339	1.00086	0.998347	1.00208	1.00213	1.00076	0.997675	1.0013	0.999242	0.999673	1.00032	1.00007	1.00281	1.00017	1.00356			5.7	1.00155	1.00354	1.00312	1.00313	1.00218	1.01349	1.00702	1.00024	0.992909	1.0037	1.00331	1.00297	1.00064	0.995529	0.998344	1.00496	0.998557	1.00208	0.998771	0.999841	0.996228	1.00281	1.00082			11.4	1.00169	1.00246	1.00021
	5.8	0.99948	0.997687	0.997048	0.996922	0.998654	0.992549	0.996917	1.0008	1.00226	1.00019	0.998692	0.999245	0.999048	0.993121	1.00326	0.999658			5.8	0.998561	0.998742	0.997951	1.00509	0.997362	0.990832	0.997546	1.00194	0.990796	0.998034	1.00163	1.00191	0.992974	0.994536	0.996503	1.0003	0.997534	1.00107	0.999899	1.0009	1.0012	1.00281	0.998777			11.6	1.00197	1.00363	1.0014
	5.9	0.998541	0.996036	1.00371	1.00619	0.99694	0.995164	0.995957	1.0008	1.00416	0.994507	0.993787	0.999245	0.99189	0.999903	1.00223	0.999658			5.9	1.00108	1.00354	1.00742	1.00607	1.00506	0.996358	1.00228	0.998535	0.999951	1.00465	1.00498	1.00191	0.994891	0.989568	0.994663	1.00403	0.997534	1.00007	1.00103	1.0009	1.0022	1.00521	1.00285			11.8	1.00179	1.00597	1.00021
	6	0.999644	0.99521	0.998952	0.999059	1.00294	1.00388	1.00172	0.99976	1.00226	1.00303	1.00065	0.998168	0.994958	1.00087	1.0012	1.00649			6	0.999	1.00162	0.995368	1.00509	1.00314	0.9947	0.996756	1.00109	0.995726	0.995199	1.00163	1.00085	0.994891	0.996523	0.995583	1.00496	0.995488	1.00208	0.997644	0.996664	1.00021	1.00401	0.998777			12	1.00408	1.00597	1.00495
	6.1	1.00035	0.993558	0.994191	1.00832	0.997797	1.00213	1.0046	0.99559	0.997497	1.00303	1.00164	1.00032	0.998026	1.00572	0.999148	0.999658			6.1	1.00034	0.999702	0.999673	1.00313	0.995437	1.0052	1.00386	1.00024	1.00418	0.999924	1.0075	0.999788	0.991057	0.999503	0.997424	1.00496	0.997534	1.00107	0.999899	0.999841	0.999214	1.00161	0.996739			12.2	1.00145	1.0048	1.0014
	6.2	1.00072	0.997687	1.00276	1.00262	0.993511	1.00039	1.00652	1.00185	1.00226	1.00398	1.00164	1.00248	1.00212	1.00087	1.0012	1.00063			6.2	0.999905	1.00066	0.999673	1.00411	0.998325	1.01238	1.00386	1.00279	1.00136	0.995199	1.00582	1.00297	0.993933	0.996523	0.990063	1.0003	0.991396	1.00007	0.998771	0.996664	0.998219	1.00401	1.00082			12.4	1.0014	1.0048	1.00377
	6.3	1.00095	0.99521	0.998	1.00761	0.994368	1.00126	1.0094	1.00185	1.00035	1.00493	0.998692	0.999245	1.00212	0.996028	0.999148	0.999658			6.3	1.00082	0.999702	1.00828	1.00607	0.999288	1.00078	0.997546	1.00279	0.997134	1.00181	1.00666	1.00191	0.996808	0.997516	0.996503	1.00123	0.997534	1.00107	1.00215	1.00196	0.996228	1.00521	0.999796			12.6	1.00152	1.00597	1.00021
	6.4	1.00067	0.996036	1.00086	1.00761	0.997797	1.00126	1.00172	1.00393	1.00226	0.999242	0.997711	0.998168	1.00007	1.00475	0.999148	1.00161			6.4	1.00085	0.997782	1.00656	1.00313	1.00121	1.00244	0.999124	0.997683	1.00347	0.999924	1.00582	1.00403	0.993933	0.999503	1.00018	1.0003	0.995488	1.00107	0.999899	0.997723	1.0012	1.00641	1.00183			12.8	1.00383	1.0048	1.00377
	6.5	1.00176	0.998513	1.00657	1.00405	1.00465	1.00649	1.00364	1.00602	1.00511	1.00398	1.00262	0.999245	1.00109	0.996028	1.00017	1.00259			6.5	1.00109	0.995861	1.00312	1.00313	0.999288	1.00796	0.999124	1.00365	0.995726	1.00276	1.00582	0.999788	0.999684	0.997516	1.00847	1.0003	0.991396	1.00007	1.00328	1.0009	1.0012	1.00521	0.999796			13	0.999964	1.0048	1.0014
	6.6	1.00232	0.997687	0.997048	1.01117	0.999511	0.995164	1.00076	1.00602	1.00416	1.00303	1.00065	0.999245	1.00314	1.00572	0.998121	1.00747			6.6	1.0005	0.998742	0.99709	1.00313	1.00025	1.00686	0.998335	1.0045	0.999951	1.00181	1.00666	0.996607	0.996808	1.0005	1.0057	1.00216	0.992419	1.00208	0.999899	0.997723	1.00021	1.00281	0.996739			13.2	1.00467	1.00831	1.00495
	6.7	1.00138	0.996862	0.997048	1.01117	1.00037	0.998649	1.00844	1.00185	1.0013	0.997348	1.00262	0.99709	1.00212	0.995059	0.998121	1.00454			6.7	1.00108	0.996821	1.00312	1.00215	1.00025	0.994148	1.0007	1.00194	0.999247	1.00749	0.99995	1.00085	0.992016	0.996523	1.00847	1.00496	0.997534	1.00509	1.00328	0.999841	1.0012	1.00641	1.00183			13.4	1.00283	1.00714	1.00377
	6.8	1.00125	0.996862	0.999905	1.0069	1.00123	1.00126	1.00268	1.00497	0.9994	0.999242	1.00164	1.0014	1.00109	1.00184	0.998121	1.00844			6.8	1.00043	1.00354	0.998812	1.00313	1.00218	1.00852	0.999913	1.00194	0.999951	1.0056	0.999111	1.00085	0.988182	0.997516	1.0057	1.00123	0.993442	1.00007	1.00215	0.995605	0.999214	1.00401	0.998777			13.6	1.00336	1.0048	1.00851
	6.9	1.00073	0.999339	0.999905	1.00832	1.00037	0.994292	1.00076	1.00185	0.998449	0.998295	1.00065	0.99709	0.999048	1.00087	0.994013	1.00356			6.9	0.998166	1.00162	0.997951	1.00411	1.0041	0.993595	1.0007	1.00194	0.999951	1.00087	0.998272	0.996607	0.987224	0.993542	1.00202	0.999365	0.990373	1.00208	0.998771	0.995605	0.997223	0.998006	0.99572			13.8	1.00208	1.00597	1.00732
	7	1.00173	0.999339	1.00181	1.01117	1.00465	1.01085	1.00364	1.00602	0.9994	0.999242	0.998692	1.00571	1.00109	1.00281	1.00223	1.00844			7	1.00147	0.996821	1.00312	1.0002	0.999288	1.01736	0.999124	1.0062	0.995726	1.00465	1.00331	1.00085	0.99585	0.993542	1.00847	1.0031	0.995488	1.01011	0.996517	0.994545	1.00419	1.00521	0.998777			14	1.0022	1.00129	1.0014
	7.1	1.00307	1.00429	1.00562	1.00476	1.00123	0.997778	1.00268	1.00497	1.00321	1.00303	0.998692	1.00248	1.00109	1.00475	0.99504	1.00747			7.1	1.00076	1.00258	1.0057	1.00313	1.00506	1.00023	1.0007	1.00365	0.997134	0.998979	1.00331	1.00191	0.992974	1.00447	1.0057	1.0003	0.993442	1.00107	0.999899	0.996664	0.999214	1.00281	0.997758			14.2	1.00318	1.00597	1.00495
	7.2	1.00174	1.00512	1.00657	0.997634	0.997797	1.00475	0.998838	1.00393	0.998449	1.00019	0.997711	1.00032	1.00416	0.996028	0.996067	1.00747			7.2	1.00075	1.00354	0.999673	1.00215	1.00121	1.00907	0.995967	1.00109	0.999247	1.00087	1.00079	1.00191	0.992016	0.999503	1.00939	1.0003	0.991396	1.00308	1.00103	0.997723	0.998219	1.00641	1.00183			14.4	1.00391	1.00597	1.00495
	7.3	1.00179	1.00512	0.998	1.0183	1.00465	1.00301	0.996917	1.00497	1.00511	1.00114	1.00065	0.999245	1.00007	1.00184	0.994013	1.00552			7.3	1.00107	0.999702	1.00053	1.00215	0.995437	1.00907	0.999124	1.00024	1.0084	1.0037	1.00498	1.00085	0.993933	0.99851	1.00755	1.00216	0.995488	1.00509	0.996517	0.993486	0.997223	1.00761	1.00183			14.6	1.00122	1.00246	1.00377
	7.4	1.00176	1.00099	1.00467	1.00405	0.999511	0.998649	0.997877	1.0081	1.00606	1.00398	0.998692	0.998168	0.998026	0.997965	0.994013	1.00356			7.4	0.999511	0.997782	0.99709	1.00313	0.998325	0.984201	0.999124	1.00194	0.998542	1.00087	1.00247	1.00191	0.99585	1.0005	1.00755	1.00123	0.994465	1.00107	1.00328	1.0009	0.996228	1.00401	0.998777			14.8	1.00012	1.00012	1.0014
	7.5	1.00132	1.00017	0.998	1.00904	0.99694	0.997778	0.999798	1.00914	1.00892	1.00208	0.99673	0.998168	1.00314	1.00572	0.998121	1.00161			7.5	1.00132	0.998742	0.99709	1.00411	0.999288	1.00078	0.999124	1.00365	1.00277	1.00654	1.00414	1.00297	0.99585	1.00348	1.00662	1.00123	0.992419	1.0071	0.999899	0.998782	0.997223	1.00641	1.00082			15	1.00062	1.00714	1.00377
	7.6	1.00186	0.999339	1.00086	1.00405	1.00637	1.00126	1.00172	1.00602	1.00606	1.00019	0.994768	1.00032	1.00007	1.00475	0.998121	1.00649			7.6	1.00122	0.994901	1.00053	1.0002	0.998325	1.01902	0.997546	1.00279	1.00206	0.998979	1.00498	0.994487	0.992016	1.00546	1.0057	1.00123	1.0006	1.00609	1.00215	1.0009	0.996228	1.00281	0.999796			15.2	1.002	1.0048	1.00377
	7.7	1.00295	1.00017	1.00086	1.01901	1.00894	1.01259	1.0046	1.0081	1.00511	1.00114	0.998692	0.999245	1.00109	1.00281	0.99504	1.00063			7.7	1.00054	0.994901	0.999673	1.00215	1.00121	0.990832	0.990443	1.00279	0.999951	1.0056	1.00582	0.998728	0.992974	1.00248	1.00847	1.0003	0.999581	1.0071	1.00441	1.00302	0.995233	1.00641	0.999796			15.4	1.00123	1.00714	1.00495
	7.8	1.00265	1.00264	0.998952	1.01189	1.0038	1.00126	0.998838	1.00497	1.00226	0.998295	1.00065	1.0014	1.00109	1.00184	0.992986	1.00063			7.8	0.999244	0.994901	0.999673	0.999217	0.999288	0.996911	0.999913	0.996831	1.00347	1.0037	1.00079	1.00403	0.991057	1.00248	1.00294	0.996566	0.991396	0.999066	1.00328	0.999841	0.996228	1.00401	0.997758			15.6	1.00179	1.00363	1.00258
	7.9	1.00104	1.00264	0.995143	1.00191	1.00723	1.00388	1.00172	1.00602	1.00416	0.994507	0.995749	0.998168	1.00416	0.998934	0.992986	1.00259			7.9	0.999068	0.994901	0.99709	1.00215	0.996399	0.996911	0.996756	0.998535	1.00488	1.00654	1.00666	0.999788	0.988182	0.997516	1.00018	0.998432	0.997534	1.00208	0.998771	0.998782	0.998219	1.00041	0.998777			15.8	1.00117	1.00246	1.0014
	8	1.0016	1.00512	0.995143	1.024	1.00123	1.00736	1.00076	1.00914	1.00416	0.995454	0.997711	1.00248	0.993935	1.00184	1.00017	0.999658			8	1.00038	0.995861	1.01431	1.00411	1.00121	0.999121	1.00386	1.00194	1.00629	0.999924	1.00247	0.995547	0.986265	0.995529	0.998344	0.999365	1.0006	1.00509	1.00103	1.00196	0.995233	1.00161	0.998777			16	1.00074	1.00363	0.996658
	8.1	1.0033	1.0076	1.00086	1.02329	1.00294	1.00213	1.00364	1.01331	1.00511	1.00114	0.999673	1.00248	0.998026	0.997965	0.999148	1.00356			8.1	0.99909	0.988178	1.00053	1.0002	0.994474	1.00575	1.0007	0.998535	1.00418	1.00654	1.00414	0.998728	0.989141	0.993542	1.0011	0.997499	0.995488	1.00208	0.998771	1.00302	0.999214	1.00041	0.997758			16.2	1.0035	1.00714	1.00377
	8.2	1.00321	1.00347	0.996096	1.0126	0.997797	1.00301	0.997877	1.01123	1.00321	0.999242	1.00065	1.00464	1.00007	1.00087	0.999148	1.00552			8.2	1.00133	0.999702	1.00656	1.00607	1.0041	1.01846	0.999124	1.00109	1.00699	0.995199	0.999111	0.993427	0.987224	0.996523	1.00294	0.999365	0.998557	1.00208	1.00441	1.00514	0.996228	1.00401	1.00285			16.4	1.00231	1.00597	1.00614
	8.3	1.00226	1.00595	0.997048	1.00619	0.997797	1.00126	1.00268	1.01019	1.00321	1.00398	0.995749	1.00679	1.00109	0.999903	0.994013	1.00649			8.3	0.999142	0.99394	1.00139	1.00313	0.990623	1.00354	0.997546	0.999387	1.00206	1.00181	1.00582	0.997668	0.990099	0.994536	1.00386	0.999365	0.996511	0.998062	1.00103	1.0009	0.997223	1.00281	0.999796			16.6	1.00192	1.00831	1.00495
	8.4	1.00236	1.00595	0.998952	1.01331	0.995225	1.00039	1.00268	1.01227	1.00892	0.998295	1.00065	1.00464	1.00007	0.990214	1.00428	1.00259			8.4	0.999592	0.995861	1.00139	1.00313	0.998325	1.00465	1.00228	0.996831	1.01051	1.00087	0.998272	0.996607	0.994891	0.996523	1.00662	0.997499	0.995488	0.998062	1.00215	1.0009	0.995233	0.999207	0.99572			16.8	1.00183	1.00597	1.00495
	8.5	1.00204	1.00595	1.00086	1.01616	1.00123	1.00039	0.997877	1.00914	0.9994	0.995454	0.997711	0.999245	0.994958	1.00572	0.99504	1.00356			8.5	1.00223	0.996821	1.00226	1.00313	1.00603	1.00244	1.00623	1.00024	1.00558	1.00749	1.00247	1.00191	1.00256	0.995529	1.00755	1.0003	0.999581	1.00308	1.00215	1.00196	0.997223	1.00281	1.00183			17	1.00117	1.00363	1.0014
	8.6	1.00152	1.00595	0.999905	1.00262	1.00123	0.999521	1.00172	1.0081	1.0013	0.994507	1.00262	0.999245	0.995981	1.00959	0.99504	1.00552			8.6	0.999871	0.995861	1.00398	1.00803	1.00121	0.985306	1.01017	0.998535	1.01474	0.995199	1.00163	1.00085	0.991057	1.00248	1.00018	0.999365	0.998557	1.00107	1.00215	0.999841	0.994238	0.998006	0.9947			17.2	1.00305	1.00714	1.00495
	8.7	1.00197	1.00595	1.00181	1.01402	0.999511	0.996906	1.00268	1.01227	1.00606	0.994507	1.0036	1.0014	1.00212	0.999903	0.989906	1.00552			8.7	0.999627	0.997782	1.00398	1.00215	0.996399	0.999674	1.0007	0.997683	0.998542	1.0056	0.996594	0.997668	0.998725	0.992548	1.00478	1.0031	0.998557	1.00208	1.00215	1.0009	0.996228	0.999207	0.996739			17.4	1.0053	1.0048	1.00732
	8.8	1.00316	1.00677	1.00562	1.01117	1.00294	1.00562	1.01517	1.01644	1.00701	0.994507	0.999673	0.998168	0.998026	0.998934	0.992986	1.00552			8.8	1.00309	0.995861	1.01173	1.00803	1.0041	1.00575	1.01017	0.998535	1.00981	1.0056	1.00163	0.998728	1.00256	1.0005	1.0011	1.0031	1.00367	1.00208	1.00441	0.999841	0.998219	1.00281	0.999796			17.6	1.00248	1.00831	1.00377
	8.9	1.0038	1.00512	1.00181	1.02329	1.00037	1.00126	1.00076	1.0154	1.00511	0.993559	0.999673	1.00464	0.997003	1.00378	1.00017	1.00356			8.9	1.00055	0.990099	0.999673	1.00607	1.00121	1.00023	0.999913	0.998535	1.00418	0.998034	1.00079	0.999788	1.0016	0.996523	1.0011	1.0003	1.00367	1.00107	1.00328	0.998782	1.00021	1.00521	1.00183			17.8	1.00431	1.00949	1.00614
	9	1.00369	1.01338	1.00848	1.00975	0.999511	0.999521	0.996917	1.0154	1.00511	0.998295	1.00262	1.00248	1.00518	0.999903	0.996067	1.00259			9	1.0016	0.994901	1.00139	1.00509	0.999288	0.99249	1.00465	1.00109	1.01122	1.01032	1.00247	0.997668	0.996808	0.997516	1.00202	1.0031	1.00163	1.00107	1.00328	1.0009	1.0022	1.00521	1.00082			18	1.00034	1.00949	1.00614
	9.1	1.0036	1.00099	0.998	1.00975	1.00208	1.00388	1.00652	1.01227	1.00606	0.997348	1.00556	1.00356	0.999048	1.00184	1.00223	1.00356			9.1	0.999715	0.99202	1.00226	1.00411	0.997362	0.998016	0.999124	0.996831	1.00277	1.00276	0.998272	0.999788	0.99585	0.997516	0.999264	1.00216	1.00265	1.00007	1.00328	1.0009	1.00021	1.00281	0.99572			18.2	1.0028	1.00363	1.0014
	9.2	1.00271	1.01008	1.00371	1.00975	1.00037	1.00039	1.00172	1.01331	1.00606	0.994507	0.999673	1.00356	0.997003	1.00087	0.99196	0.995753			9.2	0.999292	0.994901	1.00139	1.00509	0.993511	0.988069	1.00307	1.00109	1.01192	1.0037	0.994916	0.997668	0.994891	0.996523	0.998344	1.00216	0.999581	1.00007	1.00103	0.997723	0.999214	1.00281	0.996739			18.4	1.00386	1.00949	1.00495
	9.3	1.00105	1.00182	0.998	1.00262	1.00037	0.999521	0.997877	1.01331	1.00797	0.990718	0.995749	0.999245	1.00109	1.00378	0.992986	0.997706			9.3	0.999703	0.994901	1.00312	1.00705	1.00121	0.986964	0.995967	0.996831	1.00558	1.00654	0.99995	1.00085	0.991057	0.996523	0.997424	1.0003	0.998557	1.00007	1.00328	0.999841	0.999214	1.00641	1.00183			18.6	1.00089	1.00597	1.00614
	9.4	1.0011	1.00429	1.00086	1.01046	1.00208	0.999521	1.00076	1.01019	1.00987	0.995454	0.994768	1.00356	0.994958	1.00572	0.997094	1.00063			9.4	0.997784	0.991059	0.996229	1.00215	0.993511	0.999121	0.997546	1.00365	1.00488	0.998979	0.995755	0.995547	0.992016	0.996523	0.994663	0.999365	0.996511	0.997058	0.998771	1.0009	0.995233	1.00401	0.997758			18.8	1.00352	1.00949	1.00377
	9.5	1.00159	1.00595	0.999905	1.00405	0.998654	1.00562	1.00172	1.00602	1.00226	0.991665	1.00164	1.00464	0.998026	1.00281	0.994013	1.00063			9.5	1.00023	0.997782	1.00656	1.009	0.995437	0.984753	1.0007	1.0045	1.00488	1.0037	0.997433	0.997668	0.999684	0.991555	0.996503	0.997499	0.999581	0.997058	1.00666	1.0009	0.999214	1.01002	1.00387			19	1.00219	1.00714	1.00021
	9.6	1.00119	1.00017	0.997048	1.0069	1.00123	0.994292	1.00076	1.0081	1.00987	0.995454	1.00065	0.998168	1.00416	1.00862	0.99504	0.997706			9.6	0.998915	0.990099	1.00312	1.00411	0.993511	0.99028	1.00307	1.00194	1.00136	1.00654	0.994916	0.994487	0.999684	0.994536	0.997424	0.999365	1.00163	0.999066	1.00215	1.00302	0.994238	1.00281	0.998777			19.2	1.0015	1.00597	1.0014
	9.7	1.00194	1.00347	1.00086	1.00761	0.997797	0.998649	0.998838	1.01019	1.00987	1.00114	1.0036	1.00464	0.998026	1.00765	0.99504	1.00259			9.7	1.00233	0.998742	1.00656	1.00803	0.999288	1.00686	1.00859	1.0045	1.01263	1.0056	1.00247	0.994487	0.999684	0.99851	0.996503	1.0003	1.00367	1.00007	1.00441	0.998782	0.993242	1.00761	1.00082			19.4	1.00234	1.00597	1.00377
	9.8	1.00274	0.996862	0.998952	1.01545	1.00037	0.997778	0.996917	1.0081	1.00606	1.00303	1.00458	1.00571	1.00212	1.00378	0.996067	1.00649			9.8	1.00159	0.999702	1.00226	1.00411	0.994474	1.01073	1.0007	1.00109	1.00981	1.00087	1.00498	0.998728	0.990099	0.999503	0.992823	1.0031	1.0047	1.00509	1.00666	0.997723	0.998219	1.00882	1.00082			19.6	1.0014	1.00949	1.00258
	9.9	1.00133	1.00182	0.997048	1.00262	0.996083	0.999521	0.994996	1.00289	0.9994	1.00208	1.00654	1.0014	1.00007	1.00378	0.986825	1.00259			9.9	0.99928	0.991059	1.00053	1.00117	0.996399	1.01183	1.00307	0.999387	1.00418	1.0037	0.999111	0.996607	0.996808	0.992548	0.995583	0.998432	1.00163	0.998062	1.00215	1.0009	0.991252	1.00401	0.99572			19.8	1.00195	1.00597	1.0014
	10	1.00119	1.00595	0.997048	1.01189	0.998654	0.996906	1.00364	1.01019	1.00321	1.00493	1.00065	1.00356	1.00212	1.00475	0.992986	1.00161			10	0.998376	0.994901	0.997951	1.00607	0.991586	1.00907	0.996756	0.998535	0.992205	1.0056	1.00163	0.995547	0.996808	1.00149	0.998344	0.9947	0.998557	0.998062	1.00328	0.995605	0.990257	1.00161	0.99572			20	1.00309	1.00949	1.00495
	10.1	1.00204	1.00429	0.995143	1.00904	0.99694	0.996906	0.994036	1.01019	1.00797	1.00303	1.00458	1.00464	0.999048	1.00087	0.994013	1.00259			10.1	1.00108	0.999702	1.00656	1.00509	1.00025	1.00741	0.996756	0.999387	1.01122	0.996144	1.00414	0.996607	1.00064	1.00149	0.997424	0.997499	1.00674	1.00208	1.00103	0.995605	0.995233	1.00401	0.998777			20.2	1.00311	1.00714	1.00732
	10.2	1.00222	0.999339	0.995143	1.00547	1.00123	1.00039	1.00172	1.01019	1.0013	1.00587	1.0036	1.00248	1.00416	1.00281	1.00223	1.00747			10.2	0.99996	0.99298	0.996229	1.00215	0.994474	0.9947	1.00623	0.996831	1.01333	1.0056	1.0075	0.994487	0.992974	1.00149	0.997424	0.995633	1.00265	1.00007	1.00666	0.996664	0.996228	1.00401	1.00082			20.4	1.00143	1.00831	1.00377
	10.3	1.00277	1.00264	1.00276	1.00975	0.998654	0.997778	0.996917	1.01123	1.00035	1.00398	1.00458	1.00356	1.00007	1.00281	1.0012	1.00356			10.3	0.998121	0.99298	0.999673	1.00313	0.998325	0.991385	0.994389	0.997683	0.997838	0.999924	1.00582	0.997668	0.991057	1.00149	0.996503	0.993767	1.00572	1.00208	1.00553	0.998782	0.994238	0.998006	0.992662			20.6	1.00416	1.00949	1.00495
	10.4	1.00247	1.00512	1.00181	0.996209	1.00123	0.996035	1.00076	1.01019	1.00416	1.00493	1.00262	1.00248	1.00518	1.00475	1.00017	0.998682			10.4	0.999179	0.99394	0.997951	1.00215	0.998325	1.00299	1.0007	0.998535	0.999951	1.0056	1.00498	0.997668	0.993933	0.993542	1.00018	0.995633	1.00367	1.00107	1.00441	1.00196	0.993242	0.996805	0.9947			20.8	1.00366	1.01066	1.01088
	10.5	1.00235	1.00099	0.998952	1.00904	0.997797	0.997778	1.00076	1.00706	1.00416	1.00398	1.00458	1.0014	0.998026	1.00475	1.00428	1.00259			10.5	0.999933	0.99394	1.00398	1.00705	1.00025	0.998569	0.995178	0.997683	1.01192	1.01032	0.998272	0.998728	0.998725	0.997516	1.00202	0.997499	0.997534	0.997058	1.00441	1.0009	0.993242	0.998006	0.99572			21	1.00186	1.01066	1.01088
	10.6	1.00165	0.999339	0.998952	0.994071	1.00123	0.994292	0.997877	1.00706	1.00321	1.00114	1.00262	1.00032	1.00212	1.01056	0.997094	1.00356			10.6	0.998318	0.991059	1.0057	1.0002	0.997362	0.989174	0.996756	0.995127	0.995021	1.00654	0.999111	0.997668	0.997767	1.0005	1.0011	0.999365	1.00265	1.00107	1.00441	1.0009	0.993242	0.995604	0.992662			21.2	1.0001	1.00714	1.00377
	10.7	1.00079	0.996862	0.996096	0.999772	1.00123	0.998649	0.998838	1.00914	1.00701	1.00208	0.99673	1.0014	0.999048	1.00378	0.997094	1.00259			10.7	1.00073	0.998742	1.00828	1.00705	1.00506	0.998569	0.995178	1.00109	1.00206	1.00749	1.00331	0.996607	0.998725	1.00248	1.00018	0.997499	1.0006	0.998062	1.00779	1.0009	0.997223	0.994403	0.9947			21.4	1.0031	1.00714	1.00377
	10.8	1.00126	0.993558	0.996096	1.00547	1.0038	1.00039	0.996917	1.0081	1.00511	1.00303	1.0036	1.0014	1.00416	0.999903	1.00428	1.00161			10.8	0.999903	0.987218	1.00312	1.00411	0.998325	0.989174	0.999913	1.00109	1.00981	1.00654	0.997433	1.00085	0.997767	1.0005	0.999264	0.999365	1.00163	1.00208	1.00666	1.00302	0.994238	0.998006	0.997758			21.6	0.998084	1.00831	1.00495
	10.9	1.00204	0.999339	0.997048	1.01972	0.997797	0.999521	0.998838	1.00497	1.00321	1.00587	1.00752	0.996012	1.00723	1.00184	0.996067	0.998682			10.9	0.998632	0.99202	0.995368	1.00411	0.992549	0.993043	1.00307	0.995127	1.00206	1.00654	1.00079	0.996607	1.0016	1.0005	1.0011	0.998432	1.00367	1.00509	1.00103	1.0009	0.990257	0.994403	0.991643			21.8	1.00242	1.00714	1.0014
	11	1.00184	0.999339	0.998	1.00832	1.00208	1.00039	1.00076	1.01227	1.00797	1.00398	1.00458	0.996012	1.00109	0.998934	0.992986	0.994777			11	1.00052	0.99298	1.00914	1.00411	1.00025	1.01404	1.00386	1.0062	1.00488	1.00749	0.995755	0.991306	0.996808	1.00248	0.999264	0.996566	1.00163	1.00208	1.00666	0.997723	0.992247	0.993203	0.992662			22	1.00172	1.01066	1.00614
	11.1	1.00114	1.00347	0.997048	0.999772	1.00294	0.996906	0.997877	1.0081	1.00226	1.00587	1.00262	1.00032	0.997003	1.00281	0.996067	0.999658			11.1	1.00023	0.997782	1.0057	1.00509	1.00218	0.997464	1.00386	1.00024	1.01051	1.00465	0.993239	0.997668	0.99585	0.99851	1.00202	0.995633	1.0006	1.00509	1.00553	1.00302	0.993242	0.995604	0.991643			22.2	1.00164	1.01066	1.00732
	11.2	1.00042	1.00017	0.993239	1.00405	0.997797	1.00213	0.995957	1.0081	1.00416	1.00682	1.00262	0.994934	1.00109	0.995059	0.996067	0.997706			11.2	0.998569	0.997782	1.00484	1.00509	0.997362	0.998016	1.0007	1.00109	0.999951	0.999924	0.9924	0.994487	0.999684	0.996523	1.00202	0.996566	1.00265	1.00007	1.00328	1.00302	0.990257	0.993203	0.989605			22.4	1.00041	1.00831	0.999028
	11.3	1.0018	1.00595	1.00371	1.0126	0.998654	1.00213	0.997877	1.0081	1.0013	1.00966	1.0085	0.99709	1.00314	1.00281	0.997094	1.00552			11.3	0.999553	0.99394	1.00828	1.0002	1.00025	0.995806	1.00386	1.00109	0.999951	1.0056	0.995755	0.998728	0.998725	0.999503	0.998344	0.998432	1.00367	1.00007	1.00553	1.00408	0.990257	0.994403	0.993681			22.6	1.00019	1.0048	1.00377
	11.4	1.00256	0.999339	0.993239	1.01189	1.00208	1.00649	0.997877	1.00914	1.00416	1.00114	0.998692	0.998168	1.00109	1.00475	0.99504	0.999658			11.4	0.997622	0.989139	0.999673	1.0002	0.992549	0.99249	1.00386	0.994275	0.995726	1.00087	0.999111	0.993427	0.997767	0.997516	0.997424	0.999365	1.00367	1.0071	1.00553	1.00514	0.991252	0.992002	0.989605			22.8	1.0015	1.00949	1.00495
	11.5	1.00111	1.00182	1.00086	1.00547	0.996083	0.996906	0.994996	1.00914	1.0013	1.00398	1.00262	0.993856	1.00621	1.00572	0.992986	0.998682			11.5	0.997323	0.99298	0.99709	1.00411	0.995437	0.988069	1.00307	0.997683	1.00347	1.0037	0.997433	0.997668	0.996808	0.990561	0.993743	0.995633	0.999581	0.99505	1.00553	1.0062	0.992247	0.994403	0.990624			23	0.99827	1.01183	1.00377
	11.6	1.00159	1.00512	0.995143	1.00476	1.00208	1.00388	0.997877	1.0081	1.00701	1.00682	1.0085	0.998168	1.00109	1.00572	0.99504	0.997706			11.6	0.998761	0.997782	0.997951	1.00215	0.995437	1.00354	1.00149	1.00109	1.01051	1.00087	0.997433	0.997668	0.998725	0.995529	0.997424	0.995633	0.998557	0.996054	1.00666	1.00514	0.989261	0.993203	0.990624			23.2	0.998981	1.00831	1.00258
	11.7	1.0008	1.00512	0.995143	0.998347	0.99694	0.997778	0.990194	1.00914	1.00321	1.00303	1.00556	0.993856	1.00007	1.00184	0.990933	0.995753			11.7	0.998567	0.995861	1.00312	1.00313	0.992549	0.995806	0.99281	0.997683	0.992205	0.998979	0.997433	0.998728	0.999684	0.999503	1.00202	0.996566	1.0047	1.00308	1.00666	1.00726	0.992247	0.996805	0.991643			23.4	0.99833	1.00597	0.997843
	11.8	1.00069	1.00512	0.995143	1.00405	1.00551	1.00301	0.998838	1.00914	1.0013	1.00682	1.00654	0.994934	0.998026	1.00959	0.998121	0.997706			11.8	0.998494	1.00162	1.00139	1.00509	0.995437	0.984201	1.00149	1.00024	1.00418	0.998034	1.00163	0.999788	0.997767	0.99851	0.998344	0.997499	0.998557	1.00107	1.01004	1.0009	0.988266	0.993203	0.989605			23.6	1.00563	1.01066	1.00732
	11.9	1.00188	1.00099	0.994191	0.999059	0.999511	0.996906	0.991155	1.01436	1.01273	1.00587	1.00065	0.999245	1.00416	1.00281	1.00017	1.00063			11.9	0.99735	0.994901	1.00226	1.00215	1.00025	0.968175	0.994389	1.00194	1.00065	1.00465	1.00079	0.997668	0.996808	0.995529	0.997424	0.995633	0.995488	0.997058	1.00666	1.00514	0.991252	0.999207	0.993681			23.8	0.998339	1.01066	1.0014
	12	1.00229	1.00512	0.995143	1.01189	0.999511	1.00649	0.995957	1.00914	1.00701	1.00398	0.998692	1.00248	1.00007	1.00669	1.00428	0.999658			12	0.996173	0.994901	1.00914	1.00313	0.999288	0.966517	0.988075	0.993423	0.993613	1.00276	0.996594	0.998728	0.997767	0.999503	1.00018	0.998432	0.996511	1.00208	1.00666	1.00408	0.988266	0.9896	0.986547			24	1.00078	1.01066	1.00495
	12.1	1.0026	0.998513	0.993239	1.00975	0.997797	0.999521	0.994036	1.01019	1.00797	1.01156	1.00065	0.998168	1.00621	1.00959	0.996067	0.998682			12.1	0.997339	0.99298	0.999673	1.00313	0.997362	0.990832	0.991232	0.993423	0.984459	1.00276	0.999111	1.00085	0.999684	1.00149	0.997424	0.997499	1.0006	1.00208	1.00779	1.00302	0.993242	0.993203	0.989605			24.2	1.00119	1.01066	1.00495
	12.2	1.00147	0.997687	0.996096	1.00547	1.00208	1.00039	0.997877	1.00914	1.00797	1.00398	0.997711	0.998168	1.00109	1.00184	0.996067	0.99673			12.2	0.997943	0.994901	1.00914	1.00705	1.00218	0.990832	0.995178	0.995979	0.998542	0.998979	0.99995	0.994487	0.996808	1.00149	0.999264	0.996566	0.993442	0.997058	1.00779	1.00408	0.990257	0.993203	0.987566			24.4	0.998434	1.00597	1.0014
	12.3	1.00044	1.00429	0.992286	1.0069	1.00551	1.00301	0.995957	1.00602	1.00321	1.00303	1.00065	0.998168	1.00007	0.99409	0.990933	0.99673			12.3	0.999297	0.997782	1.00828	1.00803	1.00025	1.00188	1.00149	0.999387	1.0077	0.996144	0.999111	0.993427	0.992016	0.999503	0.995583	0.998432	1.00163	1.00208	1.00441	1.00514	0.988266	0.994403	0.989605			24.6	1.00038	1.01066	1.00258
	12.4	1.00062	1.00595	0.998952	1.00262	0.996083	0.998649	0.990194	1.00497	1.00701	1.00871	1.00458	1.00032	1.00109	1.00572	0.99504	0.997706			12.4	0.996243	1.00162	1.00398	1.00607	0.992549	0.985859	0.991232	0.993423	0.9915	1.00181	0.996594	0.996607	0.996808	0.995529	0.995583	0.997499	0.999581	0.998062	1.00779	0.999841	0.989261	0.9896	0.986547			24.8	1.00029	1.00831	1.0014
	12.5	1.00145	1.00182	0.998952	1.00262	1.00123	0.996906	0.994996	1.01019	1.01177	1.00493	1.00752	0.99709	1.00825	1.00087	0.992986	0.995753			12.5	0.998913	0.998742	1.00828	1.00803	1.00314	1.00465	0.996756	0.996831	0.99643	1.00276	0.998272	0.996607	0.992016	0.994536	0.995583	0.998432	0.999581	1.00208	1.00328	1.00302	0.993242	0.993203	0.990624			25	1.00024	1.01183	0.999028
	12.6	1.00112	1.00347	0.998	0.996209	1.0038	0.997778	0.996917	1.01019	1.00511	1.00682	1.00752	0.999245	1.00007	0.998934	0.989906	0.993801			12.6	0.998467	0.998742	1.00226	1.00215	0.997362	0.998016	1.00465	1.00109	1.00136	1.00465	0.997433	0.995547	0.993933	0.995529	0.995583	0.996566	1.0006	0.999066	1.00328	1.00196	0.990257	0.995604	0.990624			25.2	1.00069	1.00949	1.0014
	12.7	1.00064	0.999339	0.994191	1.0069	1.00208	0.998649	0.994996	1.00706	1.00892	1.00682	1.0036	0.999245	0.999048	0.999903	0.99504	0.995753			12.7	0.998635	0.994901	1.00656	1.00607	0.996399	1.00133	0.999124	0.999387	0.999247	1.00181	0.999111	0.996607	0.99585	0.997516	0.996503	0.998432	1.00265	0.999066	0.999899	0.998782	0.991252	0.996805	0.992662			25.4	1.00005	1.00949	1.00258
	12.8	1.00151	1.00017	0.999905	1.01117	1.00894	1.00213	0.995957	1.0081	1.00416	1.00682	1.0036	1.00248	0.99189	1.00475	0.996067	0.997706			12.8	0.996677	0.995861	0.99709	1.0002	0.995437	0.985859	0.989654	0.992571	1.00629	0.991418	1.00079	0.991306	0.998725	0.997516	0.999264	1.00123	0.999581	1.00308	1.00215	1.00196	0.987271	0.998006	0.991643			25.6	1.00052	1.00831	1.00377
	12.9	1.0019	0.996036	0.997048	1.00547	1.00551	1.00213	0.992115	1.00602	1.00511	1.00682	1.00458	1.00248	1.00416	1.00184	0.997094	0.99673			12.9	0.996766	0.99298	1.00398	1.00411	1.00025	0.993595	0.992021	1.00109	0.9915	0.998034	0.994916	0.993427	0.996808	0.997516	0.997424	0.999365	0.998557	1.00107	0.997644	0.999841	0.986276	0.996805	0.991643			25.8	1.00114	1.00949	1.0014
	13	1.00244	1.00017	1.00086	1.00547	1.01066	1.00126	0.993075	1.00914	1.00987	1.00682	1.00164	1.00464	1.00109	1.00959	0.997094	0.998682			13	0.998012	0.999702	1.00484	1.00215	0.994474	1.01238	1.0007	1.00194	1.00347	0.999924	1.00247	0.992366	0.993933	0.996523	0.998344	0.995633	0.996511	0.996054	1.00103	0.997723	0.98329	0.993203	0.989605			26	0.999627	1.00831	1.0014
	13.1	1.00272	0.99521	0.999905	1.00476	1.01066	0.998649	0.993075	1.00914	1.00892	1.00966	1.00556	0.999245	1.00416	1.00087	0.997094	0.994777			13.1	0.998224	0.997782	1.00139	1.00313	0.997362	1.00078	0.991232	0.997683	1.01051	0.998034	1.00331	0.993427	0.993933	0.997516	0.996503	1.0003	0.999581	1.00509	0.997644	0.998782	0.986276	0.998006	0.992662			26.2	1.00074	1.00949	1.00614
	13.2	1.00185	1.00347	0.999905	1.00191	1.00294	0.991678	0.984432	1.00914	1.00511	1.00682	1.00556	1.00356	1.00007	1.0125	0.997094	0.999658			13.2	0.99737	0.994901	1.00053	1.00313	0.999288	0.9947	0.995967	1.00194	1.00488	0.998034	0.998272	0.991306	0.99585	0.995529	0.995583	1.0003	0.996511	1.00308	1.00215	0.997723	0.988266	0.995604	0.988585			26.4	1.00071	1.00831	1.00377
	13.3	1.00203	1.00264	0.998952	1.00191	1.00637	1.00213	0.991155	1.0081	1.00606	1.00493	1.0036	1.00571	1.00109	1.01056	0.997094	0.99673			13.3	0.997421	0.995861	0.997951	1.00215	0.997362	1.0052	0.991232	1.00279	0.995021	0.998979	0.995755	0.992366	0.997767	0.996523	1.0011	0.998432	1.00163	1.00107	1.00103	1.00196	0.986276	0.993203	0.989605			26.6	0.999659	1.00831	0.999028
	13.4	1.00226	1.0076	0.995143	1.00619	1.00465	0.998649	0.989234	1.01019	1.00987	1.00587	1.00948	0.996012	1.00621	0.999903	0.994013	0.997706			13.4	0.996978	1.00546	1.01259	1.00803	1.00025	0.989174	0.987286	0.996831	0.995021	0.997089	0.994077	0.993427	0.993933	1.0005	1.0011	0.997499	0.997534	1.00107	0.996517	0.995605	0.984285	0.995604	0.990624			26.8	0.999914	1.013	1.00377
	13.5	1.0014	1.00182	0.998	1.00619	1.00123	0.996906	0.991155	1.0081	1.00511	0.998295	1.00752	1.00248	0.995981	1.00087	0.99504	1.00259			13.5	0.997372	0.996821	0.99709	1.00411	0.996399	1.00244	0.99281	1.00279	1.00347	0.994254	0.995755	0.993427	0.988182	0.99851	0.996503	1.00123	0.999581	1.00509	1.00553	1.00408	0.9813	0.993203	0.989605			27	0.998804	1.01183	1.00614
	13.6	1.00053	0.998513	0.993239	0.996209	1.00294	0.999521	0.993075	1.00914	1.00511	1.00019	1.01243	1.0014	1.00212	0.997965	0.99504	0.997706			13.6	0.997221	1.00162	1.00312	1.00705	0.997362	1.00078	0.9936	1.0045	1.00418	0.987638	0.991561	0.989186	0.994891	0.992548	1.00294	0.999365	0.995488	1.00409	0.996517	0.993486	0.987271	0.998006	0.993681			27.2	0.999178	1.01183	1.00377
	13.7	0.999437	1.00099	0.995143	1.00048	1.00037	1.00039	0.998838	1.01123	1.00416	0.988824	1.00164	0.993856	1.00416	0.997965	0.983745	0.99673			13.7	0.996962	0.998742	0.99709	1.00509	0.993511	1.00188	0.9936	1.00024	1.00136	0.987638	1.00079	0.991306	0.993933	0.999503	1.00018	1.00216	0.999581	1.00107	1.00103	0.997723	0.984285	0.990801	0.991643			27.4	1.00004	1.00831	1.00021
	13.8	0.999781	1.00512	0.996096	1.00476	1.00208	1.00126	0.990194	1.01019	1.00606	0.993559	1.00262	1.00032	1.00212	1.00281	0.997094	1.00063			13.8	0.995993	0.995861	1.00742	1.00705	0.997362	1.00078	0.987286	1.00279	0.99643	0.989528	0.995755	0.988126	0.993933	0.995529	0.996503	0.996566	0.995488	1.00208	1.00215	0.998782	0.986276	0.9896	0.986547			27.6	1.00075	1.01066	1.00258
	13.9	1.0006	0.996862	0.997048	1.00761	1.00551	0.999521	0.991155	1.01019	1.00226	0.996401	1.00458	1.0014	0.998026	0.996996	0.99504	1.00063			13.9	0.99694	0.997782	1.00742	1.00803	1.00314	0.996911	0.995967	1.00365	1.00558	0.994254	0.993239	0.989186	0.989141	0.993542	0.995583	0.995633	0.993442	0.997058	1.00328	0.997723	0.987271	0.993203	0.991643			27.8	1.00191	1.01066	1.00969
	14	0.999347	0.999339	0.992286	0.996922	1.00208	0.996035	0.987313	1.01019	1.0013	0.997348	0.998692	0.99709	1.00212	1.00281	0.994013	0.999658			14	0.995105	0.994901	1.00312	1.00607	0.995437	0.998569	0.99281	0.997683	1.0084	0.991418	0.994916	0.987065	0.992974	0.990561	0.995583	0.992834	0.989349	0.996054	1.00103	0.995605	0.984285	0.992002	0.991643			28	1.00261	1.013	1.01325
	14.1	0.999543	0.996036	0.997048	1.00333	1.00465	0.994292	0.992115	1.01019	1.00226	0.998295	1.00262	1.00679	1.00314	1.00378	0.99196	1.00259			14.1	0.996201	0.997782	0.996229	1.00607	0.991586	1.00907	0.994389	1.00194	1.00629	0.991418	0.998272	0.991306	0.988182	0.990561	0.994663	0.993767	0.992419	0.999066	1.00328	0.998782	0.984285	0.994403	0.992662			28.2	0.999533	1.00949	0.999028
	14.2	0.999742	0.993558	0.988477	0.994071	1.0038	0.999521	0.994036	1.00602	1.00892	0.993559	1.00262	0.998168	1.00314	1.00572	0.990933	1.00063			14.2	0.995203	0.997782	0.998812	1.00411	0.997362	1.00465	0.999913	0.998535	1.00065	0.984803	0.994916	0.992366	0.986265	0.987581	0.996503	0.992834	0.992419	0.997058	1.00553	0.996664	0.984285	0.990801	0.990624			28.4	1.00047	1.01066	1.0014
	14.3	0.99881	1.00182	0.998952	1.00048	1.00208	0.994292	0.988273	1.01227	1.00797	0.997348	1.00458	0.992778	0.998026	1.00184	0.982718	0.997706			14.3	0.995652	0.996821	0.99709	1.00705	0.995437	0.991937	0.998335	1.00109	1.0084	0.991418	0.99995	0.993427	0.992974	0.987581	0.997424	0.992834	0.992419	0.997058	1.00666	0.998782	0.980304	0.990801	0.986547			28.6	1.00144	1.00949	1.00377
	14.4	0.999902	0.998513	0.993239	1.01331	1.00894	1.00213	0.994996	1.00602	0.996545	0.998295	1.00752	1.00032	0.994958	1.00765	0.989906	1.00356			14.4	0.995371	1.00354	0.997951	1.00411	0.995437	0.9947	0.995178	0.998535	0.99643	0.989528	0.99995	0.984945	0.992974	0.992548	0.994663	0.995633	0.998557	1.00007	1.00103	0.996664	0.984285	0.990801	0.990624			28.8	0.999917	1.01183	1.00614
	14.5	1.0005	0.999339	0.993239	1.00761	1.00551	0.996035	0.990194	1.00706	1.00226	0.997348	1.00752	1.0014	1.00109	0.998934	0.987852	1.00356			14.5	0.996462	0.996821	1.00398	1.00509	0.994474	1.00354	0.996756	1.0045	1.00488	0.988583	0.993239	0.990246	0.992016	0.988574	0.995583	0.995633	0.997534	0.997058	1.00328	0.999841	0.98329	0.995604	0.991643			29	0.995781	1.01534	1.00851
	14.6	0.999147	1.00264	0.994191	1.01331	0.998654	0.989064	0.987313	1.00706	0.995593	0.995454	1.00262	0.998168	0.998026	1.00087	0.989906	1.00259			14.6	0.995787	1.0045	1.00914	1.00705	0.993511	1.00188	0.992021	0.995979	0.989388	0.991418	0.994916	0.989186	0.996808	0.989568	0.997424	0.991901	0.993442	0.997058	1.00328	1.0009	0.984285	0.992002	0.991643			29.2	1.00072	1.01183	1.00377
	14.7	0.99965	0.999339	0.996096	1.0183	1.00294	0.996906	0.991155	1.01331	1.00606	0.992612	1.00262	1.00032	1.00007	1.00281	0.989906	1.00161			14.7	0.996966	1.00931	1.00828	1.00803	0.997362	1.00188	1.00149	1.00194	1.00277	0.990473	0.997433	0.989186	0.993933	0.991555	0.997424	0.993767	0.990373	0.993042	1.00328	0.999841	0.986276	0.985997	0.989605			29.4	1.00135	1.013	1.00851
	14.8	1.00019	1.00429	0.994191	1.00761	0.997797	0.989935	0.989234	1.00706	1.00321	0.991665	1.0036	1.0014	1.00416	1.00378	0.99196	1.00161			14.8	0.996732	1.00546	1.00139	1.00411	0.995437	1.02344	0.994389	1.00024	1.00629	0.989528	0.994077	0.992366	0.989141	0.991555	0.990063	0.9947	0.992419	0.997058	1.00553	0.999841	0.985281	0.987198	0.988585			29.6	1.00094	1.01534	1.00732
	14.9	0.999906	1.00595	0.999905	1.00832	1.00637	0.993421	0.990194	1.0081	1.00035	0.993559	0.998692	1.00248	1.00212	1.00959	0.989906	0.99673			14.9	0.994718	1.00642	1.00312	1.00607	0.994474	1.00465	0.98334	0.995979	0.990796	0.991418	0.990722	0.991306	1.00256	0.987581	0.994663	0.9947	0.994465	0.997058	1.00215	0.996664	0.98329	0.984796	0.987566			29.8	1.00122	1.00949	1.00377
	15	0.99996	1.00182	0.996096	1.00904	1.00465	0.991678	0.987313	1.0081	0.9994	0.996401	1.00458	1.00032	1.00314	0.996996	0.99196	1.00161			15	0.996777	0.999702	1.01001	1.00803	0.994474	1.00409	0.995178	1.00279	1.00277	0.991418	0.994916	0.991306	0.992974	0.996523	0.995583	0.9947	0.993442	1.00007	1.00666	1.00302	0.9813	0.983595	0.986547			30	1.00039	1.01183	1.0014
	15.1	1.00019	1.00264	0.996096	1.01331	1.00208	0.996906	0.994036	1.00706	1.00035	0.997348	1.00065	1.00032	1.00416	0.999903	0.996067	1.00161			15.1	0.994844	0.996821	0.99709	1.00411	0.98581	1.00796	0.998335	1.00024	0.999951	0.987638	0.994916	0.989186	0.991057	0.991555	0.995583	0.992834	0.993442	0.998062	1.00441	1.0009	0.98329	0.984796	0.988585			30.2	1.00089	1.01183	1.00377
	15.2	1.0002	1.00512	0.98943	1.00547	1.00208	0.990807	0.990194	1.01123	1.00226	0.998295	1.00556	1.00464	0.999048	1.00087	0.988879	0.999658			15.2	0.994479	0.997782	0.99709	1.00509	0.990623	1.00133	1.00149	0.996831	0.995021	0.989528	0.989883	0.988126	0.992974	0.989568	0.990983	0.995633	0.995488	1.00007	1.00328	0.999841	0.982295	0.985997	0.989605			30.4	1.00034	1.01534	1.00495
	15.3	0.999414	1.0076	0.996096	1.00832	0.999511	0.988192	0.985392	1.01123	1.00035	0.997348	1.00164	1.0014	1.00314	0.997965	0.992986	0.997706			15.3	0.996278	1.00931	1.01517	1.00803	0.996399	0.991937	0.996756	0.997683	1.00277	0.988583	0.9924	0.989186	1.00064	0.990561	0.991903	0.991901	0.995488	0.997058	1.00441	0.999841	0.9813	0.987198	0.989605			30.6	0.998755	1.01183	1.00021
	15.4	0.999792	0.997687	0.990382	1.0126	0.998654	0.992549	0.993075	1.01227	1.00701	0.998295	1.00654	0.998168	1.00518	1.00184	0.99196	0.998682			15.4	0.996928	1.00738	1.00742	1.00803	0.993511	1.00299	1.00307	0.995979	1.01685	0.988583	0.997433	0.987065	0.99585	0.993542	0.990983	0.990967	0.992419	0.997058	1.00553	0.999841	0.982295	0.985997	0.989605			30.8	0.999848	1.01066	1.00969
	15.5	0.99972	1.00677	0.990382	1.00761	0.993511	0.989064	0.991155	1.00706	0.998449	0.997348	1.00654	1.00032	1.00416	1.00378	0.989906	1.00063			15.5	0.996012	1.00258	1.00742	1.00607	0.991586	1.00796	0.997546	1.00194	1.01051	0.989528	0.998272	0.987065	0.992974	0.985594	0.991903	0.987235	0.990373	0.99505	1.00441	0.996664	0.984285	0.9896	0.993681			31	0.998789	1.01183	1.00258
	15.6	0.999806	1.00925	0.994191	1.01402	1.00123	0.997778	0.988273	1.01123	0.9994	0.994507	1.00164	1.0014	1.00007	0.999903	0.992986	1.00161			15.6	0.996205	1.00642	1.00656	1.00705	0.993511	0.998016	0.990443	1.00109	1.00347	0.989528	1.00079	0.989186	0.996808	0.990561	0.990063	0.992834	0.993442	0.998062	1.00666	1.0009	0.98329	0.987198	0.990624			31.2	0.997119	1.01183	1.00377
	15.7	0.99973	1.00182	0.98562	1.00832	1.00123	0.989064	0.991155	1.01227	1.00321	0.991665	1.00458	1.00032	1.00416	1.00669	0.982718	1.00161			15.7	0.995519	1.0045	1.00398	1.01194	0.992549	0.999674	0.999124	0.996831	0.993613	0.989528	0.995755	0.990246	0.993933	0.992548	0.992823	0.992834	0.994465	0.994046	1.00553	0.998782	0.98329	0.984796	0.990624			31.4	1.00128	1.01534	1.00732
	15.8	0.999246	1.00429	0.98943	1.0183	1.00037	0.996906	0.993075	1.00706	0.995593	0.993559	1.00262	0.99709	1.00212	0.998934	0.992986	1.00063			15.8	0.997744	1.01219	1.00828	1.01096	0.995437	1.02178	1.00149	1.00024	1.00488	0.995199	0.996594	0.991306	0.997767	0.986587	0.991903	0.991901	0.995488	0.997058	0.999899	0.993486	0.9813	0.985997	0.990624			31.6	1.00113	1.01417	1.00969
	15.9	1.00001	1.00429	0.987525	1.03041	0.99694	0.999521	0.992115	1.01436	0.9994	0.998295	1.0036	0.998168	0.999048	0.996028	0.989906	0.997706			15.9	0.996055	1.00642	1.01001	1.01194	0.996399	1.01073	0.999124	0.999387	0.994317	0.990473	1.00079	0.986005	0.992974	0.992548	0.988222	0.9947	0.994465	1.00107	1.00328	0.994545	0.9813	0.979992	0.984509			31.8	0.998182	1.01066	1.00495
	16	0.999363	1.00512	0.987525	1.0126	0.991796	0.989064	0.983471	1.01123	1.0013	0.996401	1.00065	0.999245	0.997003	1.00475	0.988879	1.00454			16	0.99755	1.01315	1.01345	1.01292	0.997362	1.01294	1.00307	0.999387	1.00065	0.992364	1.00331	0.987065	0.992016	0.986587	0.990983	0.991901	0.994465	0.997058	1.00553	0.995605	0.984285	0.982394	0.989605			32	0.998804	1.00714	1.00377
	16.1	0.998758	1.00264	0.98943	1.01046	1.00294	0.992549	0.985392	1.01227	1.00511	0.998295	0.997711	1.00464	1.00314	0.992152	0.988879	1.00356			16.1	0.995359	1.00738	1.00312	1.00998	0.996399	0.993043	0.994389	0.998535	0.999247	1.00087	0.996594	0.986005	0.992974	0.989568	0.993743	0.989101	0.992419	0.99505	1.00328	0.996664	0.984285	0.983595	0.991643			32.2	0.999977	1.01534	1.01206
	16.2	0.998913	0.996862	0.984668	1.00904	1.00037	0.996906	0.988273	1.00914	1.00416	0.994507	0.999673	0.996012	1.00723	0.999903	0.988879	1.00259			16.2	0.996637	1.01123	1.00742	1.01194	0.994474	1.00741	0.997546	0.997683	1.00136	0.999924	0.999111	0.989186	0.990099	0.989568	0.990983	0.991901	0.994465	0.997058	1.00553	0.996664	0.9813	0.983595	0.987566			32.4	0.999448	1.013	1.00851
	16.3	0.998587	1.00017	0.986573	1.0183	0.995225	0.989935	0.985392	1.01019	1.00226	0.994507	0.999673	1.00356	1.00007	0.999903	0.994013	0.999658			16.3	0.99529	1.01027	1.00656	1.00607	0.994474	0.99249	0.9936	0.999387	0.992205	0.988583	1.00163	0.989186	0.991057	0.992548	0.991903	0.992834	0.995488	0.999066	1.00666	0.997723	0.982295	0.984796	0.987566			32.6	0.998215	1.00714	1.00021
	16.4	0.998795	0.996862	0.98562	1.00476	0.994368	0.994292	0.985392	1.01019	1.00321	0.996401	1.0036	1.00032	1.00723	1.00669	0.99196	1.00356			16.4	0.995364	1.01123	1.00742	1.00803	0.986772	0.997464	0.997546	1.0062	1.00488	0.990473	0.994916	0.989186	0.992016	0.989568	0.990983	0.990034	0.991396	0.997058	1.00553	0.995605	0.978314	0.984796	0.988585			32.8	0.99746	1.00831	1.00258
	16.5	0.999185	1.00347	0.984668	1.00975	0.998654	0.991678	0.984432	1.01123	1.00226	1.00019	1.00556	0.996012	1.00416	1.00862	0.987852	1.00259			16.5	0.996223	1.00738	1.00656	1.009	0.987735	1.01073	0.999124	1.00279	1.00418	0.997089	1.00079	0.993427	0.988182	0.987581	0.991903	0.991901	0.991396	0.998062	1.00215	0.992427	0.9813	0.983595	0.989605			33	1.00029	1.01183	1.00732
	16.6	0.998872	1.00099	0.990382	1.00761	0.994368	0.991678	0.986352	1.01019	1.00226	1.00208	1.00752	0.99709	0.998026	0.996996	0.988879	1.00063			16.6	0.996547	1.01123	1.00742	1.009	0.990623	0.991385	0.994389	1.00024	0.999247	0.995199	0.99995	0.991306	0.990099	0.989568	0.990983	0.993767	0.994465	1.00509	0.999899	0.990309	0.984285	0.996805	0.998777			33.2	0.999601	1.01066	1.00377
	16.7	0.999038	0.996862	0.98943	1.00975	0.998654	0.998649	0.989234	1.00706	0.9994	1.00114	1.00752	0.998168	1.00212	1.00475	0.987852	1.00552			16.7	0.997789	1.01219	1.00914	1.00998	0.987735	1.00465	0.996756	1.00024	0.997134	0.996144	1.00247	0.992366	0.990099	0.989568	0.993743	0.993767	0.995488	1.00308	1.00215	0.995605	0.988266	0.992002	0.998777			33.4	0.999119	1.01417	1.00614
	16.8	0.999146	0.999339	0.988477	1.01687	0.992654	0.986449	0.98059	1.0081	1.01082	0.993559	1.00458	1.00248	1.00007	1.00184	0.988879	1.00356			16.8	0.997348	1.01219	1.01087	1.0139	0.996399	0.999674	0.995967	0.996831	1.00206	0.994254	0.998272	0.989186	0.993933	0.985594	0.995583	0.991901	0.993442	0.998062	1.00328	0.996664	0.987271	0.9896	0.996739			33.6	1.00151	1.01885	1.01562
	16.9	0.999935	0.999339	0.991334	1.024	0.994368	0.991678	0.983471	1.0081	1.00892	0.996401	1.00752	0.999245	1.00416	1.00669	0.997094	1.00747			16.9	0.997226	1.01315	1.00914	1.00998	0.992549	0.996911	0.998335	0.999387	0.997838	0.990473	0.997433	0.988126	0.990099	0.991555	0.990983	0.992834	0.994465	1.00007	1.00215	0.994545	0.988266	0.996805	1.00387			33.8	0.99899	1.00949	1.00377
	17	1.00037	0.99521	0.983716	1.02186	1.00037	0.993421	0.987313	1.00706	1.00511	0.999242	1.01537	0.994934	1.00212	0.996028	0.989906	0.999658			17	0.9944	1.00931	0.998812	1.00803	0.98581	0.988622	0.999913	0.995979	0.998542	0.994254	1.00247	0.993427	0.986265	0.989568	0.990063	0.990034	0.990373	0.996054	1.00103	0.993486	0.985281	0.984796	0.9947			34	1.00048	1.013	1.01206
	17.1	0.99941	0.996036	0.987525	1.02115	0.995225	0.989935	0.986352	1.00497	1.00226	0.997348	1.01243	1.0014	0.995981	1.00281	0.994013	1.00356			17.1	0.995869	1.01411	1.00656	1.009	0.992549	0.99028	0.994389	0.997683	0.987979	0.996144	0.994916	0.991306	0.990099	0.982613	0.991903	0.991901	0.995488	1.00007	1.00328	0.994545	0.989261	0.993203	1.00183			34.2	0.999671	1.01066	1.00495
	17.2	0.999222	0.998513	0.991334	1.00904	0.996083	0.989935	0.985392	1.00602	1.0013	0.999242	1.01537	0.99709	1.00518	1.00669	0.985798	0.998682			17.2	0.996459	1.01123	1.0057	1.00705	0.984847	0.989174	0.999124	1.00024	0.999247	1.00087	0.998272	0.989186	0.991057	0.989568	0.992823	0.9947	0.994465	0.998062	0.999899	0.993486	0.989261	0.992002	1.00183			34.4	0.998794	1.01534	1.01088
	17.3	0.998475	0.999339	0.986573	1.01616	0.994368	0.986449	0.98059	1.00914	1.00797	0.989771	1.01046	0.998168	1.00007	0.997965	0.990933	1.00063			17.3	0.996166	1.00738	1.00398	1.00803	0.988698	1.00188	0.989654	1.00024	1.00277	1.00181	0.995755	0.992366	0.989141	0.989568	0.992823	0.989101	0.987303	0.990029	1.00328	0.998782	0.991252	0.992002	0.999796			34.6	0.999987	1.01534	1.00614
	17.4	0.998059	1.00099	0.98943	1.01331	0.99694	0.991678	0.985392	1.00185	1.0013	0.994507	1.01537	0.993856	1.00109	0.999903	0.988879	0.998682			17.4	0.994699	1.00642	1.01001	1.00705	0.987735	0.986964	0.991232	1.00024	0.987979	0.998034	0.994077	0.990246	0.990099	0.987581	0.996503	0.992834	0.991396	0.996054	0.998771	0.990309	0.989261	0.990801	0.999796			34.8	0.998784	1.01768	1.01088
	17.5	0.998781	0.998513	0.993239	1.01331	1.00037	0.990807	0.984432	1.00289	1.00321	0.992612	1.01733	0.99709	0.999048	1.00475	0.992986	0.999658			17.5	0.995297	1.01027	1.00226	1.00803	0.992549	0.974806	0.992021	0.996831	0.997838	1.00087	0.994916	0.990246	0.992016	0.991555	0.994663	0.990967	0.995488	0.998062	0.996517	0.991368	0.991252	0.993203	1.00082			35	0.998641	1.01534	1.00377
	17.6	0.998702	1.00512	0.990382	1.00547	0.994368	0.987321	0.98059	1.00289	1.00606	0.989771	1.01341	0.996012	1.00212	1.00378	0.990933	1.00259			17.6	0.996744	1.01699	1.01173	1.00803	0.997362	0.998569	0.992021	0.995979	0.993613	0.994254	0.994916	0.992366	0.992974	0.990561	0.993743	0.993767	0.993442	0.993042	1.00328	0.994545	0.988266	0.993203	0.99572			35.2	0.998437	1.01183	1.00495
	17.7	0.999124	1.00512	0.990382	1.01901	1.00123	0.993421	0.984432	1.00497	1.00701	0.992612	1.01439	0.994934	1.00416	1.00572	0.986825	0.998682			17.7	0.997485	1.01219	1.00484	1.009	0.990623	1.00244	0.995178	1.00109	0.999247	0.999924	0.991561	0.994487	0.990099	0.993542	0.993743	0.993767	0.989349	0.996054	1.00328	0.994545	0.991252	0.995604	1.00285			35.4	0.997353	1.013	1.00614
	17.8	0.99979	1.00842	0.991334	1.00761	0.998654	0.993421	0.984432	1.00914	1.00511	0.990718	1.01046	0.996012	1.00314	1.00087	0.988879	1.00259			17.8	0.998169	1.01603	1.00053	1.00509	0.992549	0.996911	1.00149	1.00194	0.998542	0.998979	0.999111	0.992366	1.00064	0.986587	0.997424	0.9947	0.993442	0.99505	1.00215	0.994545	0.996228	0.995604	0.999796			35.6	1.00064	1.01651	1.00614
	17.9	0.998842	1.00429	0.994191	1.02543	0.995225	0.991678	0.982511	1.00393	0.9994	0.991665	1.01145	0.994934	1.00109	0.993121	0.987852	0.997706			17.9	0.996938	1.01219	1.00226	1.00607	0.984847	0.990832	0.997546	1.00194	1.00347	0.998034	0.995755	0.992366	0.991057	0.994536	0.992823	0.995633	0.996511	0.996054	1.00328	0.996664	0.993242	0.990801	0.996739			35.8	1.00077	1.013	1.00851
	18	0.998157	1.00099	0.991334	1.00904	0.992654	0.990807	0.982511	1.0081	1.00226	0.993559	1.01145	0.996012	1.00314	0.998934	0.987852	1.00161			18	0.99739	1.00738	1.00914	1.00607	0.988698	0.997464	0.990443	1.00109	0.999951	1.0037	0.994077	0.993427	0.992016	0.985594	0.998344	0.996566	0.993442	0.996054	1.00328	0.994545	0.995233	0.993203	1.00285			36	0.996428	1.00363	1.0014
	18.1	0.99839	0.998513	0.993239	1.00048	0.995225	0.989935	0.988273	1.00497	1.00226	0.994507	1.0085	1.00032	1.00109	1.00862	0.99196	1.00356			18.1	0.997219	1.01315	1.00656	1.00607	0.983884	1.00023	0.996756	0.997683	1.00629	1.0037	0.990722	0.992366	0.993933	0.989568	0.996503	0.996566	0.993442	0.991034	0.999899	0.992427	0.995233	0.992002	1.00082			36.2	0.995123	1.00949	1.00969
	18.2	0.997694	1.00512	0.988477	0.994071	0.985796	0.988192	0.979629	1.00289	0.998449	0.992612	1.01145	0.998168	1.00621	1.00669	0.99196	0.999658			18.2	0.997274	1.01315	1.01087	1.00313	0.983884	0.998016	0.997546	0.995979	1.00488	1.00087	0.990722	0.989186	0.999684	0.985594	0.997424	0.993767	0.991396	0.996054	1.00328	0.994545	0.996228	0.992002	1.00183			36.4	0.998639	1.01066	1.00732
	18.3	0.998238	1.00264	0.990382	1.01687	0.99694	0.992549	0.985392	1.00706	1.00606	0.992612	1.01046	0.999245	1.00416	1.00281	0.990933	0.999658			18.3	0.995863	1.01027	1.00484	1.00411	0.986772	0.998016	0.989654	0.992571	1.00136	0.998034	0.993239	0.989186	0.99585	0.995529	0.993743	0.993767	0.989349	0.992038	1.00103	0.995605	0.992247	0.992002	0.999796			36.6	0.996896	1.00831	1.00258
	18.4	0.998617	1.00429	0.988477	1.00262	0.996083	0.994292	0.979629	1.01019	1.00321	0.988824	1.01046	0.999245	0.997003	0.997965	0.986825	1.00161			18.4	0.996333	1.01219	1.00828	1.00803	0.987735	0.999121	0.998335	0.997683	0.999247	0.992364	0.993239	0.990246	0.994891	0.989568	0.992823	0.993767	0.991396	0.992038	0.999899	0.992427	0.993242	0.992002	1.00082			36.8	0.999216	1.013	1.00969
	18.5	0.998549	1.00182	0.995143	1.01474	0.993511	0.995164	0.982511	1.01019	1.00416	0.991665	1.01046	0.99709	1.00212	1.00669	0.988879	1.00161			18.5	0.996619	1.01795	1.00742	1.01096	0.990623	1.01128	0.994389	0.992571	0.997134	0.997089	0.989883	0.990246	0.996808	0.989568	0.992823	0.996566	0.991396	0.993042	0.998771	0.990309	0.989261	0.990801	0.996739			37	0.998806	1.01417	1.01088
	18.6	0.998877	1.00099	0.994191	1.00405	0.991796	0.990807	0.98059	1.00914	1.00226	0.988824	1.01145	0.999245	1.00109	1.00669	0.987852	1.00161			18.6	0.995489	1.00642	1.00656	1.00705	0.98581	1.00299	0.990443	0.988311	0.989388	0.996144	0.994916	0.988126	0.99585	0.989568	0.995583	0.995633	0.996511	0.998062	0.998771	0.991368	0.990257	0.993203	0.999796			37.2	1.0009	1.01417	1.00732
	18.7	0.997518	1.00429	0.992286	1.00333	0.991796	0.989064	0.974827	1.00914	1.00226	0.988824	1.0085	0.999245	0.999048	1.00184	0.988879	1.00161			18.7	0.995271	1.00931	1.00828	1.00998	0.98581	1.00631	0.9936	0.994275	0.992909	0.998034	0.988205	0.991306	0.996808	0.988574	0.995583	0.991901	0.985257	0.991034	0.997644	0.990309	0.991252	0.990801	0.998777			37.4	0.998285	1.01417	1.01088
	18.8	0.996493	1.00429	0.984668	1.00333	0.990082	0.991678	0.98059	1.00497	1.00035	0.990718	1.00654	1.00032	0.998026	1.00281	0.983745	0.997706			18.8	0.996563	1.01315	1.00398	1.00803	0.988698	1.00962	0.989654	0.991719	0.995021	0.996144	0.994916	0.989186	0.993933	0.989568	0.992823	0.995633	0.993442	0.998062	1.00103	0.990309	0.993242	0.994403	1.00183			37.6	0.997314	1.013	1.00495
	18.9	0.996448	1.00182	0.987525	1.00975	0.991796	0.991678	0.985392	1.00497	1.00416	0.987876	1.01341	0.99709	0.999048	1.00184	0.977583	0.999658			18.9	0.995379	1.01219	1.00914	1.00803	0.986772	1.00188	0.989654	0.997683	0.990796	0.993309	0.991561	0.979644	0.992974	0.9846	0.990983	0.9947	0.994465	1.00007	0.999899	0.993486	0.990257	0.994403	1.00183			37.8	0.997899	1.01651	1.00851
	19	0.997313	1.00677	0.992286	1.00547	0.999511	0.991678	0.979629	1.00497	0.996545	0.987876	1.01243	0.999245	0.998026	1.00378	0.988879	0.998682			19	0.99578	1.00738	1.00484	1.00705	0.984847	1.00244	0.995967	0.995127	0.998542	0.997089	0.991561	0.989186	0.996808	0.9846	0.995583	0.996566	0.993442	0.996054	1.00215	0.994545	0.989261	0.988399	0.99572			38	0.997074	1.01651	1.00732
	19.1	0.997321	1.00017	0.98562	1.00547	0.996083	0.994292	0.983471	1.00602	1.00511	0.988824	1.01145	0.996012	1.00007	0.999903	0.981691	0.999658			19.1	0.997096	1.00354	1.00914	1.00411	0.986772	1.0052	0.999124	1.00194	1.00136	0.998034	0.993239	0.986005	0.996808	0.988574	0.997424	0.9947	0.992419	0.998062	0.999899	0.993486	0.992247	0.993203	1.00082			38.2	0.998294	1.01534	1.01206
	19.2	0.997502	0.998513	0.98943	1.00619	1.00208	0.994292	0.987313	0.99976	1.00416	0.987876	1.00752	0.99709	1.00212	1.00959	0.982718	1.00259			19.2	0.995781	1.00738	0.999673	1.00705	0.986772	1.00852	0.994389	0.995979	1.00136	0.995199	0.988205	0.986005	0.998725	0.987581	0.993743	0.993767	0.991396	0.994046	0.997644	0.993486	0.992247	0.993203	1.00082			38.4	0.999531	1.01651	1.00732
	19.3	0.997957	1.00264	0.986573	1.00191	0.999511	0.992549	0.985392	1.00185	1.00416	0.993559	1.01341	0.994934	1.00314	1.00959	0.97861	0.999658			19.3	0.996555	1.0045	0.995368	1.00313	0.984847	1.00962	1.00307	1.0045	1.00136	0.998979	0.990722	0.990246	0.993933	0.986587	0.991903	0.996566	0.992419	0.997058	0.997644	0.994545	0.995233	0.993203	0.998777			38.6	0.998848	1.013	1.00969
	19.4	0.997349	1.00429	0.992286	0.996922	1.00037	0.990807	0.98155	1.00497	1.00511	0.987876	1.01145	0.990622	1.00314	0.995059	0.988879	0.999658			19.4	0.996263	1.01027	1.01345	1.00607	0.987735	1.00354	1.00149	1.00024	1.00206	0.993309	0.9924	0.984945	0.993933	0.985594	0.995583	0.993767	0.988326	0.993042	0.997644	0.991368	0.992247	0.992002	0.998777			38.8	0.998825	1.013	1.01206
	19.5	0.996274	1.00099	0.991334	0.994784	0.992654	0.988192	0.975788	1.0081	1.00701	0.989771	1.00752	0.994934	1.00007	1.00572	0.980664	0.997706			19.5	0.9967	1.01315	1.00139	1.00509	0.987735	1.01846	0.995967	0.994275	1.00347	0.994254	0.990722	0.983885	0.992974	0.985594	0.992823	0.997499	0.992419	0.994046	0.997644	0.991368	0.998219	0.995604	1.00082			39	0.997427	1.01534	1.01088
	19.6	0.996701	0.996862	0.983716	1.00547	0.994368	0.994292	0.982511	1.00602	1.00701	0.992612	1.00752	0.998168	1.00109	1.00669	0.987852	1.00161			19.6	0.994807	1.00162	0.995368	1.00313	0.981959	1.00409	0.996756	0.993423	0.995021	0.998034	0.986528	0.982824	0.99585	0.986587	0.993743	0.999365	0.995488	0.999066	0.995389	0.990309	0.999214	0.993203	0.998777			39.2	0.998766	1.01066	1.00732
	19.7	0.998245	1.00182	0.991334	1.00619	0.99694	0.996906	0.98059	1.01019	1.00701	0.991665	1.00654	0.998168	1.00621	1.00475	0.980664	1.00259			19.7	0.995598	1.00642	0.999673	1.009	0.989661	0.995253	0.995967	0.996831	1.00347	0.995199	0.98485	0.983885	0.996808	0.985594	0.997424	0.999365	0.991396	0.993042	0.998771	0.990309	0.997223	0.993203	0.999796			39.4	0.999381	1.01651	1.01206
	19.8	0.997575	0.996862	0.987525	1.0012	0.997797	0.990807	0.977709	1.01019	1.00701	0.987876	1.00458	0.996012	0.997003	1.00378	0.984771	1.00259			19.8	0.996492	1.00931	1.00053	1.00509	0.986772	1.01294	0.996756	0.998535	0.999951	0.998979	0.988205	0.984945	0.993933	0.987581	0.995583	1.0003	0.990373	0.996054	0.996517	0.98925	0.998219	0.993203	0.999796			39.6	1.00124	1.01417	1.00851
	19.9	0.997179	0.992732	0.98943	1.01402	0.998654	0.996906	0.983471	1.0081	1.00606	0.990718	1.0085	0.996012	0.999048	1.00475	0.979637	1.00161			19.9	0.997697	1.01699	1.01087	1.00705	0.998325	0.9947	1.00228	0.997683	0.997134	0.996144	0.987366	0.986005	0.996808	0.988574	0.995583	0.998432	0.993442	1.00007	1.00103	0.992427	0.994238	0.994403	0.999796			39.8	0.997961	1.01534	1.00851
	20	0.997023	0.996862	0.988477	0.998347	0.998654	0.995164	0.983471	1.01019	1.00606	0.986929	1.00752	0.993856	1.00007	0.996028	0.981691	0.997706			20	0.994675	1.00835	1.00484	1.00705	0.991586	0.990832	0.988864	0.994275	0.992205	0.996144	0.984011	0.986005	1.00064	0.987581	0.999264	0.998432	0.991396	0.996054	0.997644	0.990309	0.992247	0.988399	0.996739			40	0.997941	1.01417	1.00732
	20.1	0.995132	0.992732	0.983716	0.997634	0.992654	0.997778	0.975788	1.00602	1.00511	0.986929	1.00556	0.992778	0.998026	0.999903	0.979637	0.998682			20.1	0.997279	1.01411	1.01689	1.01096	0.994474	1.01404	0.996756	0.999387	0.990796	0.994254	0.981494	0.988126	0.997767	0.992548	0.990063	1.0003	0.991396	0.999066	0.998771	0.98819	0.994238	0.990801	0.99572			40.2	0.9976	1.013	1.00377
	20.2	0.995857	1.00347	0.984668	1.01474	1.00465	0.993421	0.98059	1.0081	1.00797	0.988824	1.00752	0.992778	0.997003	1.00087	0.976556	1.00161			20.2	0.99544	1.00931	1.00656	1.00607	0.995437	1.00741	0.994389	0.999387	0.99643	0.992364	0.983172	0.984945	0.998725	0.989568	0.990983	0.996566	0.98628	0.989025	1.00103	0.98925	0.994238	0.990801	0.997758			40.4	0.997209	1.01651	1.00851
	20.3	0.997412	0.999339	0.986573	1.00761	0.996083	0.997778	0.98155	1.01227	1.00797	0.985982	1.00556	0.992778	1.00109	1.00765	0.979637	0.997706			20.3	0.995742	1.01603	1.00484	1.00998	0.994474	1.00631	0.999124	1.00279	1.0077	0.988583	0.986528	0.982824	0.992974	0.985594	0.990063	0.996566	0.984234	0.989025	0.995389	0.985013	0.993242	0.993203	1.00183			40.6	0.997898	1.01534	1.00732
	20.4	0.997142	1.00429	0.983716	1.00476	0.992654	0.989935	0.979629	1.01019	1.01082	0.987876	1.00654	0.99709	0.999048	1.00184	0.982718	1.00356			20.4	0.997217	1.01411	1.01087	1.009	0.991586	1.01017	1.00149	0.998535	0.995726	0.994254	0.988205	0.989186	0.999684	0.985594	0.997424	0.997499	0.987303	0.99505	0.997644	0.98819	0.993242	0.993203	1.00082			40.8	1.00133	1.02003	1.01088
	20.5	0.997657	1.00264	0.98943	1.01189	0.999511	0.992549	0.984432	1.00706	1.00797	0.985982	1.00262	0.99709	1.00212	1.01153	0.97861	1.00161			20.5	0.996732	1.01603	1.00656	1.00998	0.990623	1.02399	0.9936	0.999387	0.986571	0.998979	0.985689	0.986005	0.996808	0.986587	0.995583	0.996566	0.991396	0.997058	0.996517	0.987131	0.991252	0.992002	0.999796			41	0.997036	1.01417	1.00851
	20.6	0.997098	0.996036	0.978002	1.00547	0.99694	0.991678	0.978669	1.00706	1.00701	0.989771	1.01243	0.990622	1.00212	1.00378	0.979637	0.998682			20.6	0.996244	1.00835	0.996229	1.00509	0.989661	1.02233	0.997546	1.00194	0.999951	0.995199	0.987366	0.982824	0.987224	0.986587	0.988222	0.998432	0.990373	0.996054	1.00441	0.994545	0.993242	0.992002	0.999796			41.2	1.00045	1.01417	1.01325
	20.7	0.995654	0.994384	0.98562	1.01545	0.990939	0.996906	0.98155	1.00914	1.00416	0.985035	1.00164	0.994934	0.995981	1.00281	0.974503	0.998682			20.7	0.994979	1.01507	1.00484	1.00705	0.990623	1.00686	0.99281	0.999387	0.9915	0.996144	0.986528	0.983885	0.992016	0.980626	0.992823	0.995633	0.989349	0.992038	1.00103	0.990309	0.990257	0.992002	0.998777			41.4	0.99784	1.01417	1.01325
	20.8	0.996658	0.998513	0.987525	1.01972	0.999511	0.993421	0.98155	1.00914	1.00701	0.983141	1.0085	0.99709	0.998026	1.00862	0.976556	0.999658			20.8	0.995965	1.01411	1.00656	1.00803	0.988698	0.993043	0.994389	0.992571	0.990796	0.997089	0.989883	0.992366	0.99585	0.986587	0.992823	1.0003	0.993442	1.00007	1.00328	0.994545	0.989261	0.990801	0.996739			41.6	0.998751	1.01534	1.01088
	20.9	0.997593	0.997687	0.98562	1.00619	0.997797	0.990807	0.979629	1.01227	1.00606	0.982194	1.0036	0.996012	1.00109	1.01153	0.984771	1.00454			20.9	0.995903	1.01219	1.00312	1.00117	0.986772	0.999674	0.995967	1.00279	0.995726	0.997089	0.98485	0.987065	0.999684	0.986587	0.996503	0.995633	0.992419	0.999066	1.00103	0.990309	0.991252	0.993203	0.997758			41.8	0.998458	1.01768	1.01325
	21	0.997119	0.996036	0.987525	1.01189	0.99694	0.994292	0.979629	1.00914	1.00226	0.979352	0.998692	0.998168	1.00212	1.01444	0.981691	1.00161			21	0.996707	1.01219	1.00398	1.00509	0.988698	1.00244	0.995967	0.999387	1.00136	0.999924	0.989044	0.988126	0.996808	0.987581	0.990063	0.9947	0.993442	1.00107	0.999899	0.991368	0.993242	0.994403	0.998777			42	0.99839	1.01534	1.00969
	21.1	0.996886	0.992732	0.983716	1.0069	0.995225	0.989935	0.983471	1.01123	1.00321	0.992612	1.00262	0.996012	1.00518	1.00765	0.981691	1.00063			21.1	0.996407	1.00931	1.00484	1.00607	0.989661	1.00575	1.0007	1.00365	1.00629	0.994254	0.989044	0.982824	0.996808	0.983607	0.991903	0.9947	0.994465	0.996054	1.00103	0.993486	0.993242	0.9896	0.993681			42.2	0.997209	1.01417	1.00614
	21.2	0.995828	0.987777	0.986573	1.0126	0.993511	0.990807	0.976748	1.01019	1.0013	0.988824	0.993787	0.996012	1.00212	1.00669	0.973476	1.00161			21.2	0.996753	1.01603	1.01087	1.00313	0.984847	1.01625	0.994389	0.995127	1.00206	0.991418	0.989044	0.986005	0.996808	0.9846	0.995583	0.996566	0.991396	1.00007	1.00103	0.991368	0.993242	0.992002	0.996739			42.4	0.99811	1.01417	1.01088
	21.3	0.995672	0.992732	0.988477	1.00405	0.995225	0.990807	0.976748	1.00602	0.995593	0.992612	1.0036	0.998168	1.00109	1.00862	0.988879	1.00552			21.3	0.995652	1.01411	1.00742	1.00509	0.988698	1.00078	0.9936	0.997683	0.998542	0.995199	0.986528	0.987065	0.993933	0.9846	0.991903	0.992834	0.991396	0.99505	1.00215	0.995605	0.993242	0.993203	0.99572			42.6	0.997033	1.013	1.00614
	21.4	0.996836	0.998513	0.991334	1.00262	0.998654	0.991678	0.98059	1.00497	0.998449	0.994507	1.00164	0.996012	1.00109	1.00959	0.983745	1.00356			21.4	0.994308	1.00738	1.00656	1.00313	0.991586	1.00299	1.0007	0.992571	0.99643	0.990473	0.988205	0.984945	0.998725	0.982613	0.995583	0.993767	0.982188	0.991034	0.999899	0.992427	0.989261	0.9896	0.9947			42.8	0.996356	1.00597	1.00495
	21.5	0.9963	0.997687	0.98562	1.00761	0.993511	0.988192	0.979629	1.00602	0.9994	0.990718	0.999673	0.994934	1.00109	1.00475	0.979637	1.00356			21.5	0.994583	1.00835	1.01001	1.00411	0.983884	1.00907	0.99281	0.991719	0.994317	0.985748	0.98485	0.986005	1.0016	0.983607	0.999264	0.9947	0.988326	0.997058	0.993135	0.987131	0.996228	0.993203	0.99572			43	0.996133	1.00949	1.00377
	21.6	0.995581	1.00099	0.990382	1.00333	0.989225	0.988192	0.977709	1.00393	0.9994	0.994507	1.0085	0.993856	1.00212	0.999903	0.982718	1.00063			21.6	0.993563	1.00546	1.00656	1.00215	0.980034	0.982543	0.9936	0.993423	0.997838	0.991418	0.982333	0.984945	1.00256	0.985594	0.997424	0.990967	0.984234	0.991034	1.00103	0.995605	0.994238	0.995604	0.999796			43.2	0.99896	1.013	1.00614
	21.7	0.996745	0.997687	0.981811	0.999772	0.991796	0.994292	0.987313	1.00393	0.998449	0.994507	1.01046	0.99709	1.00109	1.01831	0.987852	1.00259			21.7	0.995369	1.00931	1.01173	1.00215	0.989661	0.996358	0.99281	1.00109	0.997134	0.995199	0.985689	0.987065	0.99585	0.985594	0.995583	0.992834	0.988326	0.991034	0.998771	0.994545	0.995233	0.994403	0.997758			43.4	0.997015	1.01066	1.01088
	21.8	0.997248	0.997687	0.984668	0.997634	0.990082	0.994292	0.983471	0.99976	0.998449	0.997348	1.0085	1.00032	1.00416	1.00669	0.985798	1.00161			21.8	0.995079	1.00931	1.01087	1.00411	0.984847	1.00409	0.990443	0.998535	0.999951	0.994254	0.978978	0.982824	0.999684	0.981619	0.993743	0.992834	0.990373	0.998062	0.995389	0.993486	0.998219	0.994403	0.99572			43.6	1.00043	1.01183	1.00495
	21.9	0.996279	0.996036	0.980859	0.998347	0.992654	0.989064	0.978669	1.00289	1.00416	0.992612	1.01243	0.994934	1.00518	1.00378	0.982718	1.00356			21.9	0.995293	1.00931	1.00914	1.00411	0.983884	1.01073	0.995967	0.996831	0.987275	0.993309	0.986528	0.986005	0.996808	0.9846	0.996503	0.993767	0.991396	1.00107	0.999899	0.991368	0.991252	0.992002	0.9947			43.8	0.999461	1.01768	1.00614
	22	0.996426	0.996036	0.982764	1.0126	0.995225	0.993421	0.976748	1.00602	1.00701	0.994507	1.01243	0.993856	1.00212	1.00281	0.980664	0.998682			22	0.993591	1.00546	1.00656	1.00509	0.986772	0.995253	0.9936	0.994275	0.999951	0.991418	0.987366	0.987065	0.987224	0.9846	0.988222	0.991901	0.988326	0.994046	0.995389	0.993486	0.993242	0.992002	0.997758			44	0.999749	1.01768	1.00851
	22.1	0.99679	0.99521	0.981811	1.00904	0.991796	0.990807	0.98059	1.00497	1.00606	0.987876	1.01537	0.99709	1.00109	1.00184	0.981691	1.00356			22.1	0.993165	1.0045	1.01173	1.00411	0.986772	0.978122	0.988075	0.990867	0.997838	0.995199	0.988205	0.988126	0.99585	0.9846	0.990983	0.992834	0.990373	0.994046	0.997644	0.992427	0.994238	0.988399	0.9947			44.2	1.00008	1.01651	1.00377
	22.2	0.995414	0.996862	0.984668	1.0012	0.984939	0.989935	0.975788	0.996633	1.00035	0.987876	1.01537	0.993856	1.00416	1.00765	0.977583	0.99673			22.2	0.99357	1.01315	1.00656	1.00998	0.989661	0.97978	0.989654	0.995127	0.995726	0.997089	0.988205	0.989186	0.989141	0.981619	0.986382	0.990967	0.98628	0.99505	0.997644	0.991368	0.997223	0.992002	0.996739			44.4	0.997803	1.01651	1.00614
	22.3	0.994711	0.992732	0.98562	1.0069	0.984082	0.991678	0.976748	0.99976	1.00226	0.993559	1.01341	0.9917	1.00416	1.00475	0.981691	0.998682			22.3	0.993525	1.00835	1.00226	1.00509	0.988698	0.989174	0.995178	0.995127	0.993613	0.996144	0.984011	0.987065	0.992016	0.983607	0.991903	0.990967	0.985257	0.99505	0.997644	0.992427	0.995233	0.992002	0.996739			44.6	0.998336	1.01534	1.00495
	22.4	0.995327	0.988603	0.981811	1.00975	0.984082	0.990807	0.973867	1.00393	1.00892	0.990718	1.01145	0.996012	1.00212	1.00669	0.982718	1.00063			22.4	0.993659	1.00738	1.00139	1.00607	0.986772	0.988622	0.991232	0.992571	0.990092	0.991418	0.988205	0.989186	0.992016	0.987581	0.990983	0.993767	0.991396	1.00007	0.996517	0.993486	0.996228	0.990801	0.9947			44.8	0.996589	1.01534	1.00377
	22.5	0.994888	0.990254	0.983716	1.01117	0.985796	0.982964	0.970025	0.998718	1.00035	0.989771	1.0085	0.996012	1.00723	1.00765	0.982718	0.999658			22.5	0.991862	1.00354	1.00742	1.00803	0.982922	0.985859	0.987286	0.990015	0.987979	0.989528	0.988205	0.988126	0.987224	0.980626	0.987302	0.992834	0.98628	1.00007	0.998771	0.992427	0.993242	0.9896	0.993681			45	0.997354	1.01417	1.00732
	22.6	0.99511	0.986951	0.982764	1.01616	0.993511	0.989064	0.974827	0.99559	1.00701	0.993559	1.01243	0.992778	1.00109	1.00765	0.983745	1.00161			22.6	0.994527	1.00642	1.01001	1.00509	0.990623	1.01404	0.985708	0.995127	0.9915	0.994254	0.984011	0.989186	0.989141	0.981619	0.990063	0.989101	0.98628	0.998062	0.997644	0.994545	0.997223	0.993203	0.996739			45.2	0.99801	1.01651	1.01325
	22.7	0.996529	0.988603	0.986573	1.01117	0.998654	0.996906	0.98059	1.00185	1.00701	0.985035	1.00654	0.992778	1.00518	1.00378	0.988879	1.00356			22.7	0.992323	1.00642	1.00828	1.00215	0.982922	0.993043	0.9936	0.991719	0.990796	0.990473	0.989883	0.987065	0.988182	0.981619	0.985462	0.988168	0.983211	0.99505	0.997644	0.990309	0.998219	0.993203	0.993681			45.4	0.997178	1.013	1.01088
	22.8	0.995761	0.984473	0.982764	1.00975	0.997797	0.991678	0.972907	0.99559	0.9994	0.993559	1.00458	0.994934	1.00416	1.00087	0.980664	1.00259			22.8	0.993257	1.00642	1.00398	1.00509	0.987735	1.00575	0.988864	0.990867	0.983754	0.994254	0.985689	0.983885	0.992016	0.988574	0.989142	0.986302	0.98628	0.996054	0.999899	0.991368	0.999214	0.990801	0.99572			45.6	0.997142	1.01651	1.00851
	22.9	0.99498	0.987777	0.986573	1.00547	0.994368	0.990807	0.977709	0.998718	1.00511	0.994507	1.01439	0.993856	1.00416	0.998934	0.980664	1.00063			22.9	0.992785	1.01027	1.01173	1.00705	0.988698	1.00023	0.985708	0.990867	0.984459	0.999924	0.986528	0.993427	0.986265	0.976652	0.982702	0.986302	0.988326	0.997058	0.993135	0.992427	0.995233	0.9896	0.9947			45.8	0.999033	1.02003	1.01088
	23	0.99484	0.991906	0.988477	0.997634	0.990939	0.989935	0.977709	1.0008	1.00701	0.992612	1.00556	0.993856	0.995981	1.00087	0.977583	1.00063			23	0.992581	1.00642	1.00828	1.00607	0.989661	0.974806	0.9936	0.990867	0.987979	0.995199	0.991561	0.989186	0.992974	0.989568	0.986382	0.985369	0.98628	0.997058	0.996517	0.993486	0.993242	0.9896	0.992662			46	0.997167	1.01651	1.00732
	23.1	0.994383	0.986951	0.984668	1.01687	0.989225	0.993421	0.973867	1.0008	1.0013	0.990718	1.0085	0.990622	0.999048	1.00669	0.97861	0.998682			23.1	0.992766	1.00835	1.00914	1.00607	0.98581	0.988069	0.998335	0.993423	0.994317	0.995199	0.991561	0.987065	0.991057	0.985594	0.989142	0.984436	0.981165	0.990029	0.993135	0.98925	0.995233	0.990801	0.993681			46.2	0.995819	1.01417	1.01088
	23.2	0.993926	0.983647	0.978002	1.01402	0.995225	0.993421	0.977709	0.997675	1.0013	0.993559	1.01243	0.989544	1.00007	0.996996	0.970395	0.993801			23.2	0.99261	1.00835	1.00914	1.00509	0.983884	0.986964	0.991232	0.993423	0.997838	0.988583	0.982333	0.983885	0.996808	0.992548	0.990983	0.982569	0.983211	0.992038	0.992008	0.991368	0.995233	0.993203	0.996739			46.4	0.996421	1.01417	1.01206
	23.3	0.993779	0.991906	0.988477	1.01402	0.994368	0.985578	0.970986	1.00289	1.00606	0.986929	1.00654	0.990622	1.00007	1.00184	0.977583	0.997706			23.3	0.992115	1.00354	1.00312	1.00607	0.986772	0.997464	0.9936	0.993423	0.993613	0.992364	0.986528	0.983885	0.993933	0.987581	0.985462	0.982569	0.983211	0.991034	0.992008	0.992427	0.992247	0.992002	0.993681			46.6	0.996793	1.01183	1.00732
	23.4	0.993067	0.991906	0.981811	1.00619	0.986653	0.985578	0.965223	1.00185	1.00416	0.986929	1.00752	0.988466	0.997003	1.00378	0.976556	0.992825			23.4	0.990279	1.00354	1.00053	1.00607	0.984847	0.963754	0.991232	0.990867	0.98305	0.985748	0.981494	0.975403	0.997767	0.987581	0.990983	0.988168	0.987303	0.997058	0.994262	0.994545	0.995233	0.992002	0.9947			46.8	0.997842	1.01066	1.00495
	23.5	0.992487	0.988603	0.979907	1.0069	0.990939	0.987321	0.970025	0.99976	1.00416	0.987876	1.00752	0.996012	0.998026	1.00281	0.979637	0.998682			23.5	0.990841	1.00258	1.00398	1.00705	0.986772	0.995253	0.984918	0.992571	0.995726	0.981967	0.98485	0.976463	0.984348	0.978639	0.980861	0.985369	0.987303	0.99505	0.992008	0.992427	0.998219	0.994403	0.997758			47	0.99833	1.01417	1.00969
	23.6	0.993455	0.992732	0.983716	0.996922	0.98751	0.989064	0.973867	1.00185	1.00511	0.987876	1.00262	0.996012	1.00314	1.00669	0.980664	0.997706			23.6	0.990787	1.00835	1.00914	1.00509	0.982922	0.982543	0.990443	0.995979	0.995021	0.981967	0.991561	0.976463	0.984348	0.981619	0.981781	0.985369	0.981165	0.992038	0.993135	0.996664	0.996228	0.990801	0.9947			47.2	0.998895	1.01768	1.01206
	23.7	0.994524	0.99108	0.978002	1.00975	0.995225	0.996035	0.977709	0.996633	1.00511	0.988824	1.0036	0.994934	1.00212	1.00378	0.986825	1.00063			23.7	0.9897	1.00354	1.00742	1.00705	0.986772	0.988622	0.989654	0.993423	0.990092	0.980077	0.9924	0.976463	0.984348	0.978639	0.979021	0.984436	0.984234	0.992038	0.986371	0.994545	0.995233	0.988399	0.990624			47.4	0.995836	1.01534	1.01206
	23.8	0.99569	0.989428	0.981811	1.00619	0.990082	0.994292	0.978669	1.00393	1.00892	0.989771	1.00262	0.993856	1.00212	1.0125	0.982718	1.00356			23.8	0.991771	1.00835	1.00742	1.00607	0.984847	0.976464	0.992021	0.996831	0.985163	0.993309	0.993239	0.982824	0.984348	0.981619	0.980861	0.990034	0.98628	0.998062	0.992008	0.997723	0.998219	0.9896	0.993681			47.6	0.99713	1.013	1.00851
	23.9	0.995553	0.992732	0.980859	1.01117	0.99694	0.995164	0.979629	1.0008	1.00416	0.984088	0.998692	0.994934	1.00007	1.00862	0.97861	0.999658			23.9	0.994639	1.01123	1.01345	1.00803	0.987735	1.00409	0.9936	0.996831	0.9915	0.992364	0.994077	0.984945	0.993933	0.986587	0.987302	0.989101	0.987303	0.997058	0.99088	0.990309	0.996228	0.990801	0.9947			47.8	0.996533	1.01768	1.01443
	24	0.994534	0.989428	0.978954	1.00405	0.989225	0.995164	0.970986	0.99976	1.00987	0.990718	1.00262	0.993856	1.00416	1.00087	0.97861	1.00161			24	0.993503	1.01123	1.01173	1.00607	0.987735	0.994148	0.996756	0.996831	0.992205	0.997089	0.989044	0.987065	0.989141	0.981619	0.982702	0.989101	0.982188	0.994046	0.993135	0.994545	0.997223	0.990801	0.992662			48	0.997944	1.01768	1.01088
	24.1	0.993352	0.992732	0.978954	1.0069	0.990939	0.989935	0.973867	0.998718	1.00226	0.989771	1.00164	0.989544	0.999048	0.999903	0.981691	0.994777			24.1	0.993382	1.00835	1.00226	1.00313	0.98581	1.00796	0.995178	0.994275	0.995726	0.992364	0.994077	0.986005	0.992016	0.987581	0.985462	0.990034	0.983211	0.992038	0.992008	0.993486	0.994238	0.9896	0.989605			48.2	0.997681	1.01651	1.01325
	24.2	0.992581	0.99521	0.981811	1.00262	0.995225	0.989064	0.964263	0.99976	1.00701	0.987876	0.998692	0.993856	0.995981	1.00087	0.981691	0.992825			24.2	0.993491	1.00931	1.00914	1.00313	0.986772	1.00907	0.987286	0.997683	0.987275	0.989528	0.989883	0.983885	0.989141	0.980626	0.979021	0.989101	0.991396	0.997058	0.994262	0.997723	0.996228	0.995604	0.993681			48.4	0.997057	1.013	1.00732
	24.3	0.993523	0.997687	0.980859	1.01046	0.994368	0.991678	0.974827	0.997675	1.00226	0.990718	1.00164	0.992778	1.00109	1.01444	0.977583	0.990872			24.3	0.994801	1.00738	1.00828	1.00411	0.98581	1.00409	1.00386	1.00024	0.997838	0.995199	0.988205	0.989186	0.994891	0.985594	0.983622	0.990967	0.987303	0.994046	0.987498	0.995605	0.997223	0.992002	0.992662			48.6	0.99794	1.01768	1.01206
	24.4	0.993723	0.998513	0.981811	1.0069	0.986653	0.990807	0.969065	0.99559	1.00226	0.993559	0.995749	0.992778	0.995981	1.00669	0.980664	0.995753			24.4	0.993922	1.00931	1.00828	1.00509	0.986772	0.995253	0.989654	0.996831	0.987979	0.994254	0.986528	0.991306	0.99585	0.9846	0.984542	0.992834	0.992419	1.00007	0.99088	0.995605	0.999214	0.988399	0.990624			48.8	0.999049	1.01885	1.01325
	24.5	0.993098	0.998513	0.979907	1.01189	0.993511	0.999521	0.972907	0.996633	1.00511	0.992612	0.99673	0.9917	0.994958	0.999903	0.973476	0.992825			24.5	0.99363	1.00738	1.01087	1.00607	0.988698	1.0052	0.992021	0.995979	0.985163	0.991418	0.990722	0.986005	0.994891	0.986587	0.984542	0.990034	0.990373	0.99505	0.99088	0.990309	0.995233	0.990801	0.991643			49	0.997909	1.0212	1.01088
	24.6	0.993103	0.994384	0.981811	0.998347	0.993511	0.996035	0.970986	0.996633	1.00511	0.991665	1.00065	0.992778	0.992913	1.00475	0.977583	0.995753			24.6	0.99311	1.00642	1.00656	1.00313	0.982922	1.00409	0.999124	1.00109	0.989388	0.990473	0.989883	0.989186	0.987224	0.980626	0.982702	0.990034	0.98628	0.994046	0.99088	0.993486	0.997223	0.992002	0.991643			49.2	0.996766	1.01651	1.01088
	24.7	0.992939	0.991906	0.979907	1.00333	0.989225	0.996035	0.971946	0.993505	1.00416	0.992612	1.00654	0.992778	0.999048	1.00184	0.97861	0.993801			24.7	0.994172	1.00738	1.00914	1.00607	0.98581	1.00409	0.99281	0.999387	0.990796	0.996144	0.987366	0.988126	0.994891	0.987581	0.982702	0.990967	0.989349	0.99505	0.989753	0.993486	0.997223	0.992002	0.991643			49.4	0.997103	1.01183	1.01206
	24.8	0.993812	0.991906	0.981811	1.01331	0.995225	0.995164	0.973867	0.994548	1.00226	0.990718	1.00458	0.994934	0.997003	1.01153	0.97553	0.99673			24.8	0.994082	1.00354	1.00656	1.00607	0.984847	1.01238	0.995967	0.999387	0.990092	0.992364	0.991561	0.986005	0.993933	0.988574	0.984542	0.990967	0.987303	0.996054	0.986371	0.993486	0.999214	0.992002	0.988585			49.6	0.998162	1.01417	1.01088
	24.9	0.994734	0.99108	0.984668	1.01117	0.994368	0.989064	0.973867	0.994548	1.00416	0.992612	1.01046	0.994934	0.997003	1.00959	0.979637	0.995753			24.9	0.992994	1.00835	1.00914	1.00705	0.984847	0.995806	0.987286	0.995127	0.983754	0.989528	0.988205	0.988126	0.997767	0.989568	0.986382	0.990034	0.982188	0.993042	0.99088	0.993486	0.997223	0.994403	0.993681			49.8	0.995315	1.01183	1.00851
	25	0.99431	0.991906	0.97705	1.00262	0.993511	0.991678	0.971946	0.993505	1.00797	0.992612	1.00556	0.994934	1.00007	1.00669	0.97861	0.997706			25	0.991718	0.998742	1.00398	1.00509	0.981959	1.00078	0.992021	0.999387	0.990092	0.992364	0.98485	0.990246	0.992974	0.987581	0.980861	0.989101	0.983211	0.989025	0.988626	0.98925	0.996228	0.990801	0.990624			50	0.99638	1.0212	1.00969
	25.1	0.994217	0.991906	0.988477	1.00761	0.999511	0.992549	0.972907	0.994548	1.00321	0.989771	1.00654	0.993856	1.00109	1.00475	0.979637	0.993801			25.1	0.99489	1.01027	1.00226	1.00998	0.98581	1.01902	0.995178	0.999387	0.994317	0.987638	0.985689	0.989186	0.993933	0.9846	0.979021	0.993767	0.991396	1.00208	0.986371	0.992427	0.999214	0.994403	0.991643			50.2	0.995216	1.01885	1.01443
	25.2	0.993944	0.996862	0.988477	1.00975	0.990939	0.988192	0.970025	0.996633	1.00035	0.992612	1.0036	0.989544	1.00007	1.00378	0.974503	0.992825			25.2	0.991647	1.00642	1.00053	1.009	0.984847	1.00354	0.991232	0.992571	0.990796	0.988583	0.989044	0.983885	0.982431	0.980626	0.979021	0.992834	0.989349	0.997058	0.987498	0.994545	0.995233	0.9896	0.987566			50.4	0.988276	1.01534	1.01443
	25.3	0.993538	0.989428	0.979907	1.00975	0.994368	0.986449	0.967144	0.997675	1.00511	0.992612	1.00654	0.993856	0.998026	1.00765	0.982718	0.99673			25.3	0.992707	1.01027	1.00914	1.009	0.98581	1.01017	0.995178	0.991719	0.988684	0.991418	0.983172	0.984945	0.987224	0.980626	0.979941	0.9947	0.990373	0.999066	0.988626	0.990309	0.994238	0.988399	0.986547			50.6	0.982969	1.01183	1.00614
	25.4	0.99422	0.990254	0.984668	1.01331	0.999511	0.989935	0.967144	0.994548	1.00701	0.989771	1.00458	0.994934	0.998026	1.00862	0.97861	0.997706			25.4	0.990624	1.00066	0.998812	1.00313	0.979071	1.01017	0.9936	0.986607	0.978121	0.990473	0.982333	0.991306	0.986265	0.981619	0.979021	0.993767	0.989349	0.99505	0.988626	0.991368	0.998219	0.9896	0.986547			50.8	0.979155	1.00714	0.999028
	25.5	0.995073	0.989428	0.988477	1.00619	1.0038	0.987321	0.968104	0.994548	1.00797	0.993559	1.00458	0.99709	1.00518	1.00765	0.986825	0.992825			25.5	0.992138	1.01315	1.01001	1.00607	0.986772	0.991937	0.999124	0.987459	0.986571	0.995199	0.988205	0.987065	0.987224	0.982613	0.978101	0.995633	0.984234	0.996054	0.985244	0.987131	0.995233	0.994403	0.989605			51	0.974878	0.994262	0.990733
	25.6	0.994362	0.991906	0.979907	1.00547	0.998654	0.990807	0.967144	0.99559	1.01082	0.991665	1.00556	0.992778	0.999048	1.00572	0.970395	0.991848			25.6	0.992164	1.0045	0.999673	1.00509	0.977145	1.01459	1.00228	0.988311	0.987275	0.990473	0.987366	0.987065	0.986265	0.9846	0.979941	0.996566	0.993442	0.998062	0.984117	0.98925	0.994238	0.990801	0.986547			51.2	0.971005	0.987235	0.985992
	25.7	0.991849	1.00017	0.98562	1.0012	0.989225	0.984707	0.960421	0.988293	0.9994	0.993559	0.99673	0.988466	0.999048	1.00087	0.97861	0.991848			25.7	0.992582	1.00835	0.996229	1.00705	0.982922	1.02012	0.992021	0.987459	0.978121	0.997089	0.988205	0.993427	0.989141	0.985594	0.981781	0.9947	0.987303	0.997058	0.986371	0.98925	0.995233	0.990801	0.988585			51.4	0.966252	0.977866	0.983622
	25.8	0.991611	0.992732	0.980859	1.00975	0.999511	0.989064	0.969065	0.992463	1.0013	0.993559	0.998692	0.994934	0.994958	0.999903	0.97861	0.994777			25.8	0.993286	1.01219	1.00828	1.00803	0.981959	1.00741	0.999124	0.989163	0.983754	0.990473	0.98485	0.989186	0.984348	0.980626	0.982702	0.998432	0.989349	1.00007	0.987498	0.98819	0.998219	0.996805	0.991643			51.6	0.964615	0.972011	0.975326
	25.9	0.992691	0.993558	0.984668	1.01402	0.995225	0.985578	0.967144	0.994548	0.9994	0.992612	0.997711	0.992778	0.999048	1.00087	0.97861	0.994777			25.9	0.993154	1.00931	1.00484	1.00509	0.981959	1.00078	0.990443	0.989163	0.983754	0.993309	0.9924	0.990246	0.989141	0.9846	0.983622	0.997499	0.991396	1.00107	0.981862	0.992427	0.998219	0.995604	0.992662			51.8	0.961524	0.968497	0.968216
	26	0.992737	0.997687	0.984668	1.00761	0.999511	0.987321	0.970986	0.993505	1.00701	0.989771	0.999673	0.989544	0.999048	1.00087	0.973476	0.990872			26	0.991745	1.01027	1.00656	1.00607	0.980034	1.00741	0.9936	0.986607	0.985163	0.986693	0.98485	0.988126	0.989141	0.985594	0.983622	0.9947	0.982188	0.992038	0.985244	0.990309	0.998219	0.994403	0.987566			52	0.95966	0.959129	0.962291
	26.1	0.992517	0.989428	0.981811	1.00904	1.00294	0.990807	0.967144	0.988293	1.00226	0.993559	0.998692	0.993856	0.995981	1.00087	0.974503	0.994777			26.1	0.992531	1.00738	1.00914	1.00705	0.986772	0.998569	0.988864	0.986607	0.980938	0.995199	0.993239	0.996607	0.986265	0.9846	0.983622	0.996566	0.989349	0.997058	0.984117	0.987131	0.997223	0.990801	0.988585			52.2	0.955917	0.955615	0.95755
	26.2	0.992013	0.992732	0.983716	1.0069	0.998654	0.984707	0.967144	0.992463	1.00321	0.994507	0.999673	0.990622	0.994958	1.00378	0.973476	0.989896			26.2	0.991661	1.00931	1.00312	1.01194	0.984847	1.00354	0.996756	0.984903	0.995021	0.986693	0.986528	0.987065	0.984348	0.979632	0.981781	0.997499	0.984234	0.997058	0.982989	0.990309	0.995233	0.987198	0.986547			52.4	0.952169	0.94976	0.946884
	26.3	0.992236	0.992732	0.983716	1.00761	1.00294	0.990807	0.970025	0.99142	1.00035	0.997348	0.992806	0.9917	0.995981	1.00281	0.977583	0.992825			26.3	0.993645	1.00931	1.00139	1.00411	0.984847	1.02565	1.0007	0.985755	0.989388	0.992364	0.990722	0.990246	0.984348	0.9846	0.981781	0.997499	0.989349	0.999066	0.986371	0.990309	0.996228	0.9896	0.986547			52.6	0.954758	0.94976	0.95281
	26.4	0.991491	0.990254	0.981811	1.00476	0.993511	0.983835	0.966184	0.986208	1.00416	1.00019	0.997711	0.985232	0.993935	1.00087	0.97553	0.989896			26.4	0.993549	1.01603	1.00484	1.01096	0.98581	1.00796	0.998335	0.992571	0.988684	0.988583	0.989883	0.984945	0.988182	0.980626	0.981781	0.997499	0.988326	1.00007	0.981862	0.98925	0.997223	0.992002	0.992662			52.8	0.950256	0.943904	0.946884
	26.5	0.991157	0.99521	0.984668	1.00547	0.99694	0.983835	0.961381	0.989335	1.00416	0.999242	0.997711	0.990622	0.995981	1.00087	0.97553	0.999658			26.5	0.991418	1.01027	1.00656	1.00705	0.988698	0.996911	0.988075	0.991719	0.987979	0.992364	0.990722	0.988126	0.986265	0.975658	0.976261	0.9947	0.985257	0.998062	0.982989	0.991368	0.997223	0.988399	0.986547			53	0.949222	0.941562	0.943329
	26.6	0.992545	0.989428	0.978002	1.01474	0.999511	0.989935	0.974827	0.989335	1.00226	0.997348	0.999673	0.98631	1.00109	1.00087	0.97861	0.993801			26.6	0.99332	1.01315	0.997951	1.01096	0.987735	1.01459	0.9936	0.992571	0.995021	0.997089	0.990722	0.988126	0.988182	0.980626	0.977181	0.992834	0.98628	0.993042	0.986371	0.987131	0.996228	0.992002	0.991643			53.2	0.950162	0.938049	0.943329
	26.7	0.992266	0.991906	0.986573	1.00405	0.994368	0.986449	0.970986	0.984123	0.9994	0.998295	1.00164	0.987388	0.994958	1.00475	0.97553	0.991848			26.7	0.991929	1.00642	1.00656	1.00705	0.986772	0.999121	0.987286	0.990015	0.989388	0.992364	0.997433	0.987065	0.987224	0.981619	0.980861	0.9947	0.990373	0.998062	0.982989	0.987131	0.995233	0.987198	0.987566			53.4	0.950259	0.941562	0.945699
	26.8	0.991446	0.99108	0.984668	0.996209	0.99694	0.986449	0.967144	0.98725	0.998449	0.997348	0.999673	0.990622	0.997003	1.00378	0.981691	0.992825			26.8	0.991643	1.00931	1.00656	1.00607	0.984847	1.01515	0.987286	0.987459	0.985867	0.994254	0.994077	0.986005	0.985307	0.978639	0.980861	0.9947	0.988326	0.992038	0.982989	0.98819	0.992247	0.988399	0.987566			53.6	0.947011	0.935707	0.938589
	26.9	0.991356	0.99108	0.987525	1.00048	0.994368	0.985578	0.970025	0.985165	0.9994	0.993559	0.999673	0.990622	0.994958	1.00572	0.977583	0.993801			26.9	0.991816	1.01219	1.00312	1.01096	0.98581	1.01349	0.99281	0.989163	0.983754	0.998034	0.994077	0.986005	0.984348	0.978639	0.980861	0.991901	0.987303	0.991034	0.984117	0.987131	0.990257	0.988399	0.986547			53.8	0.946595	0.938049	0.940959
	27	0.991572	0.991906	0.986573	1.00476	0.996083	0.985578	0.967144	0.990378	1.00321	0.993559	1.0036	0.988466	0.998026	1.00281	0.977583	0.987944			27	0.993064	1.01123	0.999673	1.00509	0.984847	1.00631	0.996756	0.994275	0.99643	0.994254	0.993239	0.990246	0.987224	0.981619	0.981781	0.9947	0.991396	0.997058	0.980735	0.987131	0.995233	0.9896	0.988585			54	0.944968	0.929851	0.931478
	27.1	0.992009	0.987777	0.979907	1.00832	0.999511	0.990807	0.970025	0.992463	1.00226	0.992612	1.00458	0.98631	0.995981	1.00862	0.97553	0.987944			27.1	0.993465	1.01315	1.00914	1.009	0.98581	1.0168	0.988864	0.991719	0.985867	0.995199	0.994077	0.986005	0.988182	0.983607	0.981781	0.995633	0.989349	0.993042	0.984117	0.98925	0.995233	0.990801	0.989605			54.2	0.943254	0.933365	0.936219
	27.2	0.992024	0.992732	0.986573	1.00262	0.997797	0.985578	0.966184	0.990378	1.00416	0.992612	1.00556	0.989544	0.992913	1.00087	0.980664	0.989896			27.2	0.994437	1.00835	1.01087	1.00803	0.988698	1.02896	0.990443	0.993423	0.989388	0.994254	0.995755	0.989186	0.990099	0.978639	0.984542	0.9947	0.993442	0.99505	0.985244	0.987131	0.993242	0.9896	0.988585			54.4	0.942729	0.931022	0.931478
	27.3	0.992211	0.988603	0.978954	1.0069	0.996083	0.987321	0.971946	0.989335	1.00035	0.993559	1.0085	0.989544	1.00109	1.00669	0.976556	0.992825			27.3	0.992591	1.00738	1.00828	1.00705	0.98581	1.00796	0.99281	0.991719	0.988684	0.995199	0.993239	0.991306	0.988182	0.978639	0.980861	0.997499	0.991396	0.998062	0.986371	0.98925	0.992247	0.983595	0.981451			54.6	0.943978	0.927509	0.930293
	27.4	0.992143	0.99108	0.984668	1.00262	0.99694	0.989064	0.970986	0.988293	1.00226	0.989771	1.00458	0.988466	0.997003	1.00087	0.977583	0.991848			27.4	0.991242	1.0045	1.00312	1.0002	0.982922	1.01404	0.987286	0.993423	0.9915	0.988583	0.991561	0.987065	0.988182	0.980626	0.983622	0.995633	0.987303	0.993042	0.984117	0.990309	0.994238	0.983595	0.98247			54.8	0.943852	0.932193	0.933848
	27.5	0.992167	0.993558	0.988477	1.00832	1.00037	0.987321	0.971946	0.988293	0.9994	0.990718	1.00654	0.989544	0.999048	0.998934	0.977583	0.98892			27.5	0.991754	1.00642	0.998812	1.00705	0.986772	1.0052	0.989654	0.990015	0.987275	0.990473	0.997433	0.986005	0.992016	0.979632	0.983622	0.997499	0.993442	0.997058	0.979607	0.990309	0.994238	0.983595	0.98247			55	0.941605	0.92868	0.932663
	27.6	0.992077	0.988603	0.983716	0.996209	0.998654	0.982092	0.970025	0.990378	1.00416	0.994507	1.0085	0.98631	0.998026	1.00572	0.976556	0.989896			27.6	0.991318	1.01123	1.00914	1.00313	0.984847	0.97978	0.988075	0.986607	0.985163	0.991418	0.994077	0.986005	0.996808	0.9846	0.984542	0.9947	0.991396	0.994046	0.985244	0.98819	0.995233	0.987198	0.987566			55.2	0.942371	0.926338	0.926738
	27.7	0.990928	0.99521	0.98562	0.992646	0.996083	0.982092	0.967144	0.990378	1.00035	0.986929	1.00262	0.985232	0.998026	1.00572	0.976556	0.989896			27.7	0.993443	1.01027	1.01517	1.00509	0.989661	0.998016	0.988864	0.993423	0.993613	0.994254	0.998272	0.986005	0.99585	0.9846	0.985462	0.9947	0.993442	0.994046	0.985244	0.983954	0.992247	0.985997	0.987566			55.4	0.943491	0.92868	0.927923
	27.8	0.990905	0.991906	0.986573	1.01331	0.99694	0.985578	0.973867	0.98308	0.998449	0.982194	1.00262	0.987388	0.998026	0.999903	0.986825	0.985991			27.8	0.990508	1.00738	1.00398	1.00117	0.977145	0.998016	0.990443	0.990015	0.992205	0.991418	0.994916	0.986005	0.987224	0.981619	0.980861	0.995633	0.989349	0.993042	0.981862	0.987131	0.991252	0.985997	0.984509			55.6	0.941449	0.926338	0.927923
	27.9	0.991145	0.99521	0.981811	1.00048	0.999511	0.983835	0.967144	0.986208	0.998449	0.985982	1.00752	0.987388	0.994958	0.999903	0.976556	0.99673			27.9	0.990711	1.00738	1.00828	1.00509	0.987735	0.987517	0.984129	0.981495	0.973896	0.992364	0.994916	0.986005	0.993933	0.9846	0.982702	0.9947	0.992419	0.994046	0.981862	0.987131	0.996228	0.9896	0.989605			55.8	0.939899	0.926338	0.925553
	28	0.990389	0.987777	0.979907	1.00547	1.00037	0.981221	0.968104	0.98725	1.0013	0.989771	1.00752	0.980921	0.995981	0.996996	0.97553	0.991848			28	0.990697	1.00258	1.00053	1.00117	0.981959	0.9947	0.989654	0.985755	0.990796	0.991418	0.994077	0.987065	0.988182	0.980626	0.980861	0.998432	0.995488	0.99505	0.981862	0.987131	0.994238	0.987198	0.986547			56	0.94071	0.929851	0.926738
	28.1	0.989163	0.989428	0.978954	1.00832	0.991796	0.979478	0.969065	0.99142	0.9994	0.985035	0.995749	0.981998	0.99189	0.996996	0.974503	0.990872			28.1	0.991865	1.00931	1.00914	1.00117	0.981959	1.00299	0.995967	0.987459	0.9915	0.988583	0.994077	0.990246	0.985307	0.979632	0.986382	0.9947	0.994465	0.994046	0.984117	0.983954	0.991252	0.987198	0.987566			56.2	0.936888	0.927509	0.924368
	28.2	0.988771	0.989428	0.981811	0.995496	0.985796	0.983835	0.969065	0.989335	0.9994	0.991665	1.00164	0.987388	0.995981	0.997965	0.977583	0.991848			28.2	0.991307	1.01219	1.00742	1.00215	0.984847	0.994148	0.996756	0.987459	0.990796	0.991418	0.994916	0.989186	0.982431	0.978639	0.979941	0.9947	0.987303	0.994046	0.981862	0.986072	0.992247	0.9896	0.990624			56.4	0.940484	0.926338	0.924368
	28.3	0.989274	0.988603	0.981811	1.00333	0.988368	0.982092	0.970025	0.990378	1.00511	0.985035	0.994768	0.984154	0.997003	1.00572	0.977583	0.985991			28.3	0.992223	1.00835	1.00828	1.00411	0.981959	0.997464	0.996756	0.990015	0.9915	0.994254	1.00079	0.989186	0.985307	0.982613	0.988222	0.993767	0.991396	0.992038	0.981862	0.986072	0.992247	0.987198	0.985528			56.6	0.939219	0.931022	0.927923
	28.4	0.989644	0.989428	0.980859	0.996209	0.993511	0.981221	0.967144	0.986208	0.998449	0.992612	1.00556	0.984154	0.995981	1.00669	0.976556	0.994777			28.4	0.99137	1.00642	1.00914	1.00509	0.987735	0.998569	0.9936	0.983199	0.989388	0.989528	0.993239	0.986005	0.986265	0.980626	0.988222	0.993767	0.992419	0.993042	0.981862	0.983954	0.991252	0.987198	0.989605			56.8	0.937792	0.927509	0.926738
	28.5	0.990193	0.983647	0.982764	1.00975	0.99694	0.981221	0.967144	0.994548	1.00416	0.985982	0.997711	0.985232	0.994958	1.00475	0.980664	0.986967			28.5	0.992693	1.00546	1.01345	1.00411	0.986772	0.997464	1.0007	0.985755	0.990092	0.993309	0.993239	0.994487	0.982431	0.983607	0.986382	0.995633	0.994465	0.994046	0.97848	0.983954	0.997223	0.9896	0.988585			57	0.937753	0.919311	0.917257
	28.6	0.989945	0.990254	0.979907	1.00262	0.994368	0.982092	0.967144	0.98725	0.9994	0.988824	1.0036	0.983076	0.997003	1.00184	0.977583	0.986967			28.6	0.99028	1.00642	1.00656	1.00313	0.981959	0.989174	0.999124	0.987459	0.989388	0.988583	0.996594	0.988126	0.985307	0.972678	0.986382	0.995633	0.990373	0.992038	0.980735	0.982895	0.992247	0.984796	0.986547			57.2	0.941328	0.925167	0.924368
	28.7	0.989532	0.986125	0.982764	1.00191	0.990939	0.983835	0.969065	0.989335	0.998449	0.988824	1.00065	0.980921	0.995981	1.00765	0.979637	0.987944			28.7	0.990075	1.00354	1.00828	1.00215	0.982922	0.989174	0.99281	0.986607	0.986571	0.986693	0.994077	0.990246	0.981473	0.977645	0.982702	0.996566	0.994465	0.99505	0.980735	0.979717	0.993242	0.988399	0.988585			57.4	0.938566	0.920482	0.923183
	28.8	0.990371	0.985299	0.984668	1.00547	0.99694	0.986449	0.969065	0.990378	1.00226	0.988824	0.997711	0.987388	0.99189	1.01347	0.973476	0.993801			28.8	0.991148	1.00642	1.00139	1.00215	0.979071	0.99028	1.00386	0.990015	0.9915	0.994254	0.988205	0.991306	0.982431	0.983607	0.979941	0.9947	0.989349	0.994046	0.984117	0.983954	0.994238	0.990801	0.989605			57.6	0.937326	0.921654	0.925553
	28.9	0.990349	0.984473	0.975145	1.00333	0.994368	0.980349	0.966184	0.99142	0.997497	0.990718	1.00164	0.983076	0.993935	1.00765	0.982718	0.990872			28.9	0.99161	1.00546	1.00484	1.00411	0.981959	1.01128	0.999913	0.990867	0.987275	0.996144	0.989883	0.989186	0.985307	0.980626	0.980861	0.990967	0.984234	0.990029	0.980735	0.982895	0.996228	0.992002	0.990624			57.8	0.938516	0.921654	0.921998
	29	0.990263	0.987777	0.981811	1.00333	0.996083	0.985578	0.970986	0.992463	0.9994	0.990718	0.999673	0.988466	0.994958	1.00378	0.97861	0.990872			29	0.991888	1.00835	1.00312	1.00411	0.981959	1.00299	0.995178	0.986607	0.983754	0.990473	0.991561	0.994487	0.986265	0.979632	0.981781	0.995633	0.989349	0.994046	0.984117	0.986072	0.997223	0.993203	0.991643			58	0.93564	0.921654	0.920813
	29.1	0.990044	0.99108	0.984668	1.0069	0.993511	0.980349	0.964263	0.98725	0.997497	0.988824	1.00262	0.979843	0.995981	1.00862	0.970395	0.985015			29.1	0.991552	1.00258	1.0057	1.00509	0.983884	0.99249	0.994389	0.984903	0.99643	0.998979	0.993239	0.988126	0.986265	0.979632	0.979021	0.997499	0.988326	0.994046	0.982989	0.982895	0.996228	0.990801	0.990624			58.2	0.936507	0.912285	0.920813
	29.2	0.98905	0.986951	0.975145	1.00405	1.00208	0.982092	0.970986	0.988293	1.0013	0.985982	1.0036	0.981998	0.99189	1.00281	0.973476	0.984039			29.2	0.992617	1.00642	1.01001	1.009	0.990623	1.00575	0.995178	0.985755	0.981642	0.999924	0.993239	0.993427	0.989141	0.978639	0.979941	0.996566	0.990373	0.99505	0.979607	0.986072	0.994238	0.988399	0.988585			58.4	0.936908	0.922825	0.926738
	29.3	0.989161	0.986951	0.978002	1.0069	0.993511	0.980349	0.965223	0.98725	0.997497	0.991665	1.00164	0.985232	0.988823	1.01056	0.97861	0.987944			29.3	0.99123	1.00931	1.00398	1.0002	0.979071	1.00354	0.995178	0.990015	0.987275	0.999924	0.986528	0.992366	0.988182	0.979632	0.979941	0.993767	0.989349	0.992038	0.981862	0.987131	0.995233	0.985997	0.986547			58.6	0.937191	0.922825	0.921998
	29.4	0.989169	0.990254	0.979907	1.00333	0.997797	0.983835	0.967144	0.986208	0.997497	0.985035	0.993787	0.981998	1.00007	1.00862	0.972449	0.986967			29.4	0.990252	1.00835	0.998812	1.00411	0.98581	0.997464	0.988864	0.984903	0.989388	0.990473	0.98485	0.989186	0.985307	0.977645	0.978101	0.9947	0.991396	0.99505	0.982989	0.983954	0.997223	0.988399	0.988585			58.8	0.936294	0.919311	0.917257
	29.5	0.989342	0.986951	0.973241	1.00761	0.999511	0.984707	0.970986	0.988293	0.9994	0.985982	0.997711	0.985232	0.988823	1.0125	0.974503	0.989896			29.5	0.99185	1.01027	1.00398	1.00705	0.982922	0.996911	0.998335	0.991719	0.9915	0.989528	0.988205	0.989186	0.988182	0.976652	0.980861	0.996566	0.989349	0.997058	0.984117	0.987131	0.995233	0.988399	0.987566			59	0.935755	0.916969	0.919627
	29.6	0.988338	0.99108	0.976098	0.996209	0.991796	0.976864	0.970025	0.985165	0.99369	0.986929	0.999673	0.980921	0.994958	0.999903	0.974503	0.986967			29.6	0.99018	1.00546	1.00484	1.00607	0.987735	0.978675	0.987286	0.987459	0.988684	0.989528	0.985689	0.990246	0.988182	0.976652	0.980861	0.995633	0.988326	0.993042	0.985244	0.986072	0.997223	0.988399	0.992662			59.2	0.934806	0.91814	0.916072
	29.7	0.987392	0.986951	0.97705	1.00048	0.993511	0.978607	0.965223	0.985165	0.998449	0.986929	1.00164	0.983076	0.988823	1.00862	0.974503	0.987944			29.7	0.990883	1.00738	0.999673	1.00215	0.986772	0.995253	0.992021	0.987459	0.988684	0.993309	0.988205	0.989186	0.986265	0.976652	0.978101	0.9947	0.98628	0.99505	0.987498	0.987131	0.996228	0.990801	0.990624			59.4	0.93741	0.91814	0.918442
	29.8	0.988506	0.986125	0.97705	1.01687	0.988368	0.982964	0.967144	0.988293	0.997497	0.988824	1.0036	0.985232	0.993935	0.998934	0.973476	0.989896			29.8	0.98871	1.00354	1.00139	1.00313	0.983884	0.984201	0.991232	0.989163	0.985163	0.989528	0.988205	0.989186	0.98339	0.974665	0.9735	0.990034	0.990373	0.992038	0.977353	0.98819	0.994238	0.9896	0.989605			59.6	0.936526	0.923996	0.924368
	29.9	0.988212	0.985299	0.980859	0.991933	0.988368	0.975992	0.965223	0.988293	0.9994	0.986929	0.997711	0.979843	1.00007	1.00281	0.97553	0.989896			29.9	0.989412	1.00258	0.997951	1.0002	0.989661	0.977569	0.990443	0.987459	0.984459	0.994254	0.989883	0.994487	0.980514	0.978639	0.97074	0.991901	0.989349	0.99505	0.980735	0.990309	0.996228	0.992002	0.992662			59.8	0.935621	0.919311	0.920813
	30	0.987744	0.986951	0.975145	0.996209	0.995225	0.976864	0.970025	0.98725	0.996545	0.985982	0.99673	0.985232	0.988823	1.00959	0.982718	0.990872			30	0.988509	0.998742	1.00053	1.00117	0.986772	0.98199	0.995178	0.987459	0.992205	0.988583	0.978978	0.990246	0.987224	0.982613	0.9735	0.991901	0.988326	0.989025	0.981862	0.982895	0.994238	0.987198	0.986547			60	0.935982	0.920482	0.921998
	30.1	0.988326	0.986125	0.979907	1.0069	0.993511	0.979478	0.963302	0.984123	0.99369	0.986929	1.0036	0.980921	0.998026	1.00378	0.973476	0.991848			30.1	0.990172	1.00066	1.00226	1.00215	0.983884	0.979227	0.999913	0.996831	0.992205	0.992364	0.989044	0.993427	0.988182	0.983607	0.97166	0.990967	0.987303	0.989025	0.982989	0.986072	0.996228	0.987198	0.988585
	30.2	0.988735	0.986951	0.979907	1.00761	0.995225	0.976864	0.966184	0.98725	0.997497	0.984088	0.999673	0.984154	0.989845	1.00765	0.981691	0.991848			30.2	0.990501	1.00354	0.996229	1.00117	0.989661	0.980333	1.01017	1.00109	1.00347	0.980077	0.990722	0.986005	0.989141	0.983607	0.978101	0.990034	0.985257	0.989025	0.979607	0.985013	0.997223	0.985997	0.985528
	30.3	0.989563	0.982821	0.978002	1.00619	0.99694	0.982092	0.967144	0.990378	0.9994	0.985982	1.00262	0.980921	0.995981	1.0125	0.97861	0.990872			30.3	0.994768	1.00162	1.00484	0.998238	0.988698	1.02565	1.02438	0.999387	0.999951	0.988583	0.988205	0.990246	0.990099	0.990561	0.9735	0.992834	0.988326	0.992038	0.982989	0.986072	0.996228	0.990801	0.991643
	30.4	0.988695	0.985299	0.973241	0.999059	0.996083	0.976864	0.966184	0.986208	0.995593	0.982194	0.995749	0.981998	0.993935	1.01056	0.976556	0.990872			30.4	0.99722	1.00546	0.996229	0.999217	0.983884	1.03007	1.02911	1.00961	1.01896	0.992364	0.9924	0.994487	0.996808	0.990561	0.979021	0.993767	0.987303	0.994046	0.982989	0.982895	0.998219	0.990801	0.990624
	30.5	0.98733	0.987777	0.975145	0.996922	0.985796	0.978607	0.964263	0.982038	0.997497	0.988824	0.999673	0.980921	0.992913	1.00862	0.979637	0.990872			30.5	0.99694	0.999702	0.998812	0.998238	0.986772	1.02841	1.03069	1.01728	1.01403	0.987638	0.994916	0.991306	0.996808	0.989568	0.977181	0.992834	0.989349	0.99505	0.982989	0.987131	0.999214	0.987198	0.987566
	30.6	0.987142	0.988603	0.972288	1.00048	0.995225	0.973378	0.962342	0.985165	0.996545	0.988824	0.997711	0.980921	0.99189	1.00184	0.979637	0.989896			30.6	0.999057	1.00258	1.00484	1.0002	0.98581	1.01791	1.04569	1.02495	1.01967	0.985748	0.9924	0.993427	0.993933	0.999503	0.980861	0.993767	0.988326	0.999066	0.979607	0.987131	1.00021	0.992002	0.991643
	30.7	0.986943	0.991906	0.971336	1.00048	0.991796	0.976864	0.970025	0.982038	0.991786	0.988824	0.99673	0.979843	0.99189	1.01153	0.973476	0.985015			30.7	1.00285	1.00642	1.00656	1.00411	0.990623	1.02344	1.04569	1.02154	1.02671	0.993309	1.00331	0.998728	1.00256	0.99851	0.987302	0.996566	0.994465	1.00409	0.980735	0.98819	1.00319	0.992002	0.9947
	30.8	0.987654	0.986125	0.966575	1.00476	0.994368	0.981221	0.970025	0.982038	0.996545	0.989771	1.0036	0.981998	0.994958	1.00959	0.976556	0.987944			30.8	1.00656	1.01411	1.01517	1.00509	0.990623	1.05328	1.05042	1.02835	1.03939	0.992364	1.0075	0.997668	1.00448	1.00248	0.987302	0.997499	0.996511	1.00409	0.980735	0.986072	1.0022	0.994403	0.9947
	30.9	0.987418	0.987777	0.976098	0.999772	0.988368	0.972507	0.965223	0.980995	0.996545	0.985982	1.0036	0.978765	0.998026	1.00765	0.965261	0.989896			30.9	1.00874	1.01219	1.0212	1.00607	0.991586	1.04775	1.05358	1.02921	1.03798	0.990473	1.01086	1.00191	1.01023	1.01043	0.994663	1.00123	0.996511	1.01212	0.979607	0.985013	1.00718	0.996805	0.99572
	31	0.986671	0.986125	0.972288	1.00761	0.991796	0.975992	0.964263	0.980995	0.990834	0.980299	0.999673	0.984154	0.9878	1.0125	0.97553	0.993801			31	1.01238	1.01027	1.03239	1.009	0.994474	1.03228	1.05752	1.03347	1.05488	0.995199	1.01841	1.00721	1.02365	1.01043	0.996503	1.00403	1.00265	1.01614	0.982989	0.986072	1.01016	0.996805	0.997758
	31.1	0.987156	0.985299	0.972288	1.00547	0.992654	0.977735	0.964263	0.984123	0.9994	0.983141	0.997711	0.980921	0.997003	1.01056	0.973476	0.986967			31.1	1.01514	1.02467	1.03067	1.01292	0.994474	1.04278	1.05279	1.03347	1.06051	0.999924	1.02092	1.01039	1.02173	1.0154	0.997424	1.0059	1.00674	1.01915	0.981862	0.985013	1.01713	1.00041	0.998777
	31.2	0.986567	0.991906	0.97705	0.991933	0.991796	0.978607	0.962342	0.979953	0.994641	0.988824	0.998692	0.981998	0.990868	0.998934	0.972449	0.985991			31.2	1.01818	1.02371	1.04186	1.02075	1.00025	1.05936	1.05674	1.03602	1.0591	0.998979	1.02679	1.00933	1.0294	1.01441	1.00018	1.00683	1.00777	1.02116	0.981862	0.983954	1.01912	1.00161	1.00082
	31.3	0.9864	0.983647	0.975145	1.00048	0.993511	0.977735	0.963302	0.98308	0.991786	0.988824	1.00065	0.980921	0.992913	1.01153	0.97553	0.986967			31.3	1.02088	1.03619	1.04531	1.02368	1.00699	1.0682	1.05358	1.03687	1.05206	0.999924	1.03015	1.01569	1.02748	1.00845	1.00294	1.01243	1.01288	1.02417	0.982989	0.983954	1.02409	1.00641	1.00489
	31.4	0.98702	0.988603	0.97705	0.999059	0.984082	0.974249	0.960421	0.98308	0.991786	0.985982	0.99673	0.98631	0.995981	1.00959	0.982718	0.98892			31.4	1.02302	1.04196	1.04961	1.02956	1.00988	1.06488	1.05279	1.03347	1.06403	1.00276	1.02931	1.01463	1.02365	1.0154	1.00386	1.01056	1.01697	1.02818	0.981862	0.985013	1.03007	1.01002	1.00795
	31.5	0.987413	0.986125	0.976098	1.00333	0.984939	0.972507	0.963302	0.986208	0.99369	0.989771	1.00262	0.984154	0.994958	1.00765	0.979637	0.992825			31.5	1.025	1.04964	1.04875	1.03053	1.01373	1.06378	1.05516	1.04028	1.07037	1.00276	1.03434	1.01993	1.0294	1.01143	1.0057	1.01056	1.01288	1.02718	0.982989	0.986072	1.03305	1.01242	1.00897
	31.6	0.987504	0.986125	0.973241	1.00476	0.986653	0.971635	0.962342	0.985165	0.997497	0.986929	1.00262	0.983076	0.997003	1.00765	0.977583	0.985015			31.6	1.02654	1.05828	1.05564	1.03543	1.01565	1.05272	1.052	1.03773	1.06333	1.01316	1.03938	1.01993	1.03035	1.01639	1.00847	1.01523	1.02107	1.0312	0.976226	0.982895	1.03206	1.01362	1.01305
	31.7	0.986057	0.982821	0.971336	0.999059	0.982367	0.975121	0.963302	0.980995	0.99369	0.984088	0.998692	0.980921	0.992913	1.00862	0.974503	0.985991			31.7	1.02784	1.05636	1.06511	1.04032	1.02336	1.06046	1.052	1.03176	1.06474	1.0141	1.03938	1.01993	1.03515	1.01441	1.00755	1.01243	1.02209	1.0322	0.981862	0.983954	1.03106	1.01122	1.01305
	31.8	0.985939	0.988603	0.97705	0.999059	0.991796	0.976864	0.963302	0.982038	0.989882	0.989771	1.00262	0.978765	0.989845	1.0125	0.97861	0.983062			31.8	1.02875	1.065	1.05908	1.04424	1.02143	1.06101	1.06384	1.04113	1.06755	1.00843	1.03686	1.02311	1.03131	1.01242	1.00939	1.01056	1.018	1.02517	0.980735	0.985013	1.03305	1.01602	1.01916
	31.9	0.986348	0.991906	0.980859	0.995496	0.989225	0.971635	0.962342	0.982038	0.990834	0.989771	1.00065	0.979843	0.989845	1.00281	0.972449	0.986967			31.9	1.03036	1.07173	1.05392	1.04619	1.02432	1.0588	1.05516	1.03687	1.06192	1.01599	1.03267	1.02841	1.03323	1.0154	1.01123	1.01243	1.02414	1.0322	0.987498	0.991368	1.03504	1.01722	1.02222
	32	0.986398	0.991906	0.978002	1.01117	0.996083	0.973378	0.969065	0.98308	0.992738	0.981246	0.999673	0.976609	0.993935	1.00087	0.973476	0.984039			32	1.03251	1.06789	1.0565	1.05206	1.02432	1.0588	1.06147	1.04369	1.07037	1.02261	1.03267	1.03265	1.03131	1.01043	1.00939	1.0143	1.02311	1.0312	0.987498	0.993486	1.03703	1.02203	1.03241
	32.1	0.986912	0.994384	0.974193	1.01402	0.994368	0.974249	0.960421	0.982038	0.990834	0.981246	1.00164	0.978765	0.990868	1.00959	0.971422	0.984039			32.1	1.03304	1.06693	1.05822	1.05402	1.03009	1.05107	1.05989	1.04284	1.07671	1.02922	1.03602	1.02947	1.03323	1.01341	1.01031	1.01336	1.02414	1.03421	0.984117	0.98925	1.03504	1.02082	1.03445
	32.2	0.987052	0.993558	0.973241	1.01474	0.994368	0.978607	0.965223	0.980995	0.991786	0.982194	1.0036	0.975531	0.986777	1.01444	0.970395	0.984039			32.2	1.03246	1.065	1.06425	1.05402	1.02817	1.03836	1.05831	1.04113	1.07741	1.02639	1.03938	1.03159	1.03131	1.01441	1.00478	1.01616	1.02925	1.03823	0.985244	0.990309	1.03405	1.01602	1.03037
	32.3	0.986004	0.991906	0.972288	1.0012	0.990082	0.973378	0.959461	0.980995	0.99369	0.978405	0.997711	0.977687	0.986777	1.00765	0.972449	0.986967			32.3	1.03462	1.06693	1.06942	1.05989	1.03876	1.04665	1.06147	1.03943	1.07319	1.03206	1.04357	1.03372	1.03227	1.01441	1.01031	1.01336	1.02107	1.02919	0.982989	0.98925	1.04002	1.02203	1.04158
	32.4	0.98526	0.998513	0.975145	1.00333	0.986653	0.970764	0.955619	0.98308	0.992738	0.986929	1.00164	0.978765	0.986777	1.00572	0.974503	0.986967			32.4	1.03559	1.06596	1.05736	1.05598	1.03491	1.07096	1.06147	1.04284	1.06614	1.03962	1.0377	1.03902	1.03131	1.01341	1.00847	1.0143	1.0272	1.03722	0.985244	0.992427	1.03902	1.02082	1.04158
	32.5	0.985504	0.990254	0.973241	0.999772	0.990082	0.979478	0.961381	0.97891	0.99369	0.982194	1.0036	0.974453	0.990868	1.00572	0.968341	0.985991			32.5	1.03665	1.06596	1.06253	1.055	1.03587	1.06654	1.0591	1.03943	1.07741	1.04434	1.04525	1.03902	1.02748	1.01739	1.00939	1.01616	1.02823	1.03521	0.984117	0.991368	1.04002	1.02082	1.04566
	32.6	0.986259	0.99108	0.975145	1.01402	0.993511	0.975992	0.9585	0.98725	0.994641	0.981246	0.995749	0.979843	0.986777	1.01056	0.976556	0.98892			32.6	1.03779	1.07077	1.06942	1.05892	1.03876	1.06378	1.05752	1.04284	1.06967	1.04812	1.04777	1.0369	1.03131	1.01739	1.01123	1.0143	1.0313	1.03722	0.985244	0.993486	1.03703	1.01962	1.04872
	32.7	0.986803	0.988603	0.973241	1.00262	0.988368	0.975121	0.963302	0.986208	0.995593	0.983141	0.999673	0.977687	0.9878	1.01444	0.973476	0.985015			32.7	1.03854	1.06981	1.05736	1.06087	1.04357	1.0798	1.05989	1.04539	1.06826	1.04907	1.04777	1.04326	1.03515	1.02037	1.01031	1.01709	1.0272	1.03421	0.982989	0.994545	1.03604	1.01722	1.0477
	32.8	0.985257	0.990254	0.974193	0.997634	0.986653	0.970764	0.9585	0.980995	0.997497	0.979352	0.991825	0.978765	0.9878	1.00475	0.97553	0.98892			32.8	1.03716	1.06596	1.05736	1.05598	1.03491	1.07207	1.06226	1.04284	1.06122	1.05002	1.0486	1.03796	1.03706	1.01639	1.01031	1.01616	1.02925	1.03421	0.984117	0.995605	1.03604	1.01842	1.05075
	32.9	0.984761	0.991906	0.973241	0.998347	0.985796	0.973378	0.959461	0.980995	0.998449	0.982194	0.998692	0.979843	0.989845	1.00184	0.97553	0.989896			32.9	1.03831	1.07269	1.07458	1.06185	1.04935	1.05272	1.05831	1.03773	1.06403	1.05002	1.04693	1.0369	1.03227	1.01639	1.00847	1.01709	1.0272	1.03823	0.986371	0.996664	1.03703	1.02323	1.05483
	33	0.985613	0.996862	0.98562	1.00048	0.98751	0.971635	0.9585	0.98308	0.998449	0.983141	0.99673	0.976609	0.992913	1.00281	0.974503	0.980134			33	1.03875	1.07173	1.05736	1.055	1.03972	1.05438	1.06147	1.03943	1.06685	1.05758	1.05196	1.03796	1.03035	1.02136	1.00755	1.01709	1.0313	1.03923	0.989753	0.999841	1.03703	1.02563	1.05993
	33.1	0.985792	0.992732	0.976098	1.00262	0.98751	0.974249	0.963302	0.985165	1.00226	0.977458	0.989863	0.974453	0.988823	1.00669	0.977583	0.985991			33.1	1.03837	1.06981	1.06425	1.05598	1.04261	1.04941	1.06384	1.03858	1.06262	1.05758	1.0486	1.03796	1.03227	1.01838	1.00755	1.01989	1.02823	1.03923	0.986371	0.996664	1.04201	1.02443	1.05789
	33.2	0.986258	0.993558	0.978954	1.00832	0.992654	0.977735	0.962342	0.984123	0.9994	0.982194	0.993787	0.977687	0.988823	1.00184	0.97553	0.985991			33.2	1.04081	1.06981	1.07114	1.06185	1.04646	1.05107	1.05595	1.04028	1.07178	1.06419	1.04777	1.04008	1.03419	1.01739	1.01031	1.01989	1.03539	1.04124	0.992008	0.999841	1.04499	1.02443	1.05789
	33.3	0.987207	0.990254	0.973241	1.01189	0.992654	0.974249	0.969065	0.98725	1.00035	0.985982	0.990844	0.977687	0.99189	1.01153	0.970395	0.985991			33.3	1.03873	1.07269	1.05908	1.05696	1.0455	1.05383	1.05831	1.03773	1.06403	1.05947	1.05028	1.03902	1.03419	1.02037	1.00478	1.01523	1.02414	1.03421	0.993135	0.999841	1.04698	1.02443	1.05789
	33.4	0.987899	0.990254	0.973241	1.00333	0.993511	0.977735	0.963302	0.98725	1.00416	0.988824	0.99673	0.975531	0.993935	1.01541	0.974503	0.985991			33.4	1.03944	1.07173	1.05995	1.05989	1.0455	1.04996	1.05752	1.04454	1.07248	1.05758	1.04693	1.03584	1.03706	1.02335	1.00755	1.01989	1.03027	1.03823	0.996517	1.00302	1.04201	1.01722	1.05075
	33.5	0.987541	0.99108	0.980859	1.00547	0.986653	0.972507	0.959461	0.985165	1.00511	0.987876	0.997711	0.976609	0.992913	1.00765	0.970395	0.983062			33.5	1.04024	1.07557	1.06339	1.06674	1.0455	1.05051	1.0591	1.04625	1.07178	1.0623	1.04609	1.03478	1.03706	1.01937	1.00662	1.01803	1.0313	1.03722	0.99088	1.0009	1.044	1.02203	1.05585
	33.6	0.986676	0.994384	0.981811	1.00476	0.984939	0.969021	0.964263	0.980995	0.998449	0.988824	0.999673	0.974453	0.99189	1.00765	0.97553	0.98111			33.6	1.04105	1.06885	1.06597	1.05794	1.04839	1.06488	1.06305	1.0488	1.06685	1.06136	1.04525	1.03584	1.03419	1.02335	1.00294	1.0143	1.03232	1.0322	0.997644	1.00726	1.04499	1.02683	1.05993
	33.7	0.985839	0.989428	0.974193	0.996922	0.986653	0.973378	0.964263	0.985165	1.00035	0.986929	0.994768	0.974453	0.989845	1.00765	0.969368	0.984039			33.7	1.03959	1.06789	1.06081	1.05892	1.03972	1.04665	1.06147	1.04454	1.06122	1.05758	1.04525	1.03796	1.03802	1.01937	1.01031	1.01989	1.03232	1.03923	0.992008	1.00196	1.04599	1.02683	1.06298
	33.8	0.986834	0.994384	0.972288	1.01402	0.992654	0.973378	0.965223	0.986208	1.00226	0.987876	0.999673	0.978765	0.986777	1.00765	0.976556	0.989896			33.8	1.03912	1.06885	1.06253	1.05989	1.04165	1.05604	1.04569	1.04113	1.06826	1.05947	1.05028	1.03796	1.03515	1.02136	1.00478	1.01803	1.0313	1.03722	0.993135	0.998782	1.04698	1.02323	1.05891
	33.9	0.986949	0.992732	0.966575	0.996209	0.985796	0.974249	0.963302	0.984123	0.998449	0.985982	1.00262	0.975531	0.992913	1.00281	0.97553	0.984039			33.9	1.03988	1.06693	1.06339	1.05696	1.04261	1.06378	1.04963	1.04539	1.06685	1.06041	1.05112	1.03902	1.03419	1.02037	1.0057	1.01896	1.02925	1.03823	0.995389	1.00408	1.04201	1.02323	1.05993
	34	0.985865	0.990254	0.973241	0.997634	0.99694	0.969892	0.961381	0.982038	1.00035	0.986929	1.00065	0.978765	0.989845	1.00959	0.974503	0.983062			34	1.04059	1.06981	1.06511	1.05696	1.04357	1.05494	1.05279	1.04369	1.07319	1.06136	1.04944	1.03796	1.03802	1.0154	1.00755	1.02549	1.0313	1.03823	0.998771	1.00302	1.04101	1.02443	1.06095
	34.1	0.986228	0.986951	0.971336	0.999772	0.986653	0.973378	0.960421	0.98725	0.997497	0.985035	0.997711	0.977687	0.99189	1.01056	0.979637	0.985991			34.1	1.04167	1.06981	1.07286	1.05696	1.03876	1.05272	1.05279	1.0471	1.07882	1.06797	1.04693	1.04114	1.03227	1.02235	1.00386	1.02923	1.03641	1.04325	0.999899	1.0009	1.04201	1.02082	1.05993
	34.2	0.986207	0.991906	0.970384	0.992646	0.98751	0.96815	0.960421	0.979953	1.00226	0.988824	1.0036	0.979843	0.99189	1.01153	0.977583	0.987944			34.2	1.03929	1.07173	1.06339	1.05598	1.03683	1.03946	1.05358	1.04028	1.06474	1.06892	1.04777	1.03902	1.03515	1.02037	1.00386	1.02736	1.03232	1.04023	1.00215	1.0009	1.04201	1.01842	1.05993
	34.3	0.985939	0.987777	0.966575	0.998347	0.993511	0.974249	0.960421	0.979953	0.997497	0.988824	0.997711	0.976609	0.993935	1.00378	0.977583	0.986967			34.3	1.0404	1.07365	1.06683	1.05989	1.04742	1.03836	1.05437	1.03602	1.06474	1.06797	1.04693	1.0422	1.03419	1.02335	1.00662	1.02829	1.03334	1.04023	1.00328	1.00726	1.04101	1.01602	1.05687
	34.4	0.985196	0.990254	0.970384	0.990508	0.986653	0.969021	0.95754	0.98308	0.997497	0.987876	0.998692	0.978765	0.990868	1.01056	0.973476	0.986967			34.4	1.0387	1.07173	1.06856	1.05696	1.04165	1.04554	1.04727	1.03517	1.06333	1.05852	1.05196	1.03372	1.03994	1.01838	1.01031	1.02643	1.0272	1.03321	1.00328	1.00302	1.03902	1.01722	1.05891
	34.5	0.985956	0.990254	0.969431	1.00904	0.991796	0.969892	0.960421	0.97891	0.996545	0.989771	1.00065	0.979843	0.988823	1.01056	0.981691	0.98892			34.5	1.04077	1.06885	1.07372	1.055	1.04165	1.0588	1.04963	1.03347	1.07178	1.06419	1.05196	1.03796	1.03898	1.01639	1.00939	1.02736	1.03027	1.04023	1.00103	1.0009	1.04599	1.01842	1.06095
	34.6	0.986511	0.986951	0.971336	1.0012	0.982367	0.973378	0.9585	0.979953	0.996545	0.988824	0.993787	0.979843	0.994958	1.01541	0.981691	0.984039			34.6	1.04131	1.07653	1.0677	1.06087	1.04357	1.06157	1.05358	1.03773	1.07107	1.06136	1.04693	1.03796	1.03419	1.01639	1.00386	1.03109	1.03437	1.04425	1.00103	1.00514	1.03902	1.01962	1.06095
	34.7	0.986222	0.985299	0.961813	1.0012	0.992654	0.970764	0.960421	0.986208	1.00035	0.991665	0.997711	0.981998	0.99189	1.01444	0.974503	0.986967			34.7	1.04028	1.07461	1.0677	1.05989	1.03972	1.03117	1.05121	1.04284	1.07319	1.0623	1.05112	1.04326	1.03227	1.02335	1.00294	1.03109	1.0313	1.03722	1.00103	1.0009	1.04599	1.02203	1.06095
	34.8	0.98635	0.989428	0.968479	0.998347	0.997797	0.969021	0.95754	0.982038	0.996545	0.990718	0.998692	0.980921	0.994958	1.01056	0.974503	0.983062			34.8	1.04031	1.06404	1.06683	1.05892	1.03876	1.04996	1.04805	1.04199	1.06192	1.06797	1.04525	1.04326	1.03994	1.02037	1.00386	1.03202	1.03539	1.04224	1.00553	1.00302	1.04002	1.01962	1.05789
	34.9	0.985784	0.988603	0.972288	0.994071	0.990939	0.967278	0.9585	0.982038	0.998449	0.989771	0.994768	0.983076	0.99189	1.00765	0.976556	0.985015			34.9	1.0401	1.06308	1.06942	1.05598	1.03876	1.05107	1.04963	1.04369	1.06333	1.0623	1.04357	1.0369	1.03227	1.02037	1.0057	1.03202	1.04051	1.04726	1.00666	1.00302	1.03803	1.02082	1.05789
	35	0.985545	0.988603	0.970384	0.998347	0.991796	0.969021	0.964263	0.98725	0.9994	0.989771	0.997711	0.978765	0.992913	1.00475	0.970395	0.982086			35	1.04108	1.06596	1.07028	1.05892	1.03587	1.06212	1.05595	1.04454	1.07037	1.06325	1.04022	1.03796	1.03515	1.01937	1.00662	1.03202	1.03437	1.04224	1.00441	1.0009	1.03902	1.02323	1.06095
	35.1	0.985326	0.988603	0.974193	0.996209	0.990939	0.962921	0.95754	0.98308	1.0013	0.990718	0.995749	0.978765	0.993935	1.00378	0.974503	0.982086			35.1	1.04091	1.07461	1.06942	1.06087	1.04165	1.05272	1.04648	1.04028	1.06403	1.06419	1.05112	1.03902	1.03227	1.02037	1.0057	1.02923	1.03539	1.04626	1.00779	1.00302	1.03902	1.02082	1.05585
	35.2	0.985428	0.991906	0.975145	0.998347	0.986653	0.967278	0.95754	0.985165	0.998449	0.988824	0.998692	0.977687	0.99189	1.01056	0.972449	0.987944			35.2	1.041	1.06789	1.0677	1.05598	1.03876	1.06322	1.05516	1.03687	1.07812	1.05947	1.04944	1.03902	1.03227	1.01639	1.00847	1.02923	1.03744	1.04927	1.00779	1.00408	1.03703	1.01362	1.05483
	35.3	0.985685	0.990254	0.973241	1.00476	0.988368	0.964664	0.952738	0.98725	1.00416	0.987876	0.998692	0.976609	0.99189	0.999903	0.977583	0.984039			35.3	1.04168	1.06693	1.0677	1.05696	1.03298	1.05936	1.05831	1.04199	1.06614	1.06325	1.0486	1.04008	1.03131	1.02335	1.00755	1.03016	1.03948	1.05128	1.00666	1.00408	1.03902	1.02082	1.06095
	35.4	0.985321	0.988603	0.975145	0.996209	0.986653	0.967278	0.9585	0.984123	1.00035	0.985982	0.997711	0.979843	0.995981	0.999903	0.971422	0.989896			35.4	1.0411	1.06885	1.06425	1.05598	1.03587	1.05328	1.05674	1.03261	1.06755	1.06325	1.05196	1.04538	1.03515	1.02136	1.00755	1.02829	1.03846	1.04626	1.00779	1.00196	1.03902	1.01962	1.06298
	35.5	0.984868	0.985299	0.971336	0.995496	0.988368	0.971635	0.956579	0.982038	1.00226	0.985035	1.0036	0.973375	0.995981	1.00184	0.974503	0.98111			35.5	1.04091	1.07653	1.07114	1.05989	1.04068	1.05604	1.05121	1.03517	1.06544	1.06514	1.04693	1.04644	1.03131	1.02235	1.00478	1.02549	1.03232	1.04224	1.00779	1.00196	1.04002	1.01722	1.05993
	35.6	0.984697	0.984473	0.972288	1.00405	0.991796	0.973378	0.959461	0.982038	0.995593	0.985035	1.00556	0.974453	0.99189	0.997965	0.971422	0.983062			35.6	1.04021	1.07077	1.06942	1.06185	1.03683	1.04444	1.04174	1.04113	1.06755	1.06797	1.05196	1.04432	1.03515	1.02136	1.00847	1.02456	1.03027	1.04325	1.00666	1.0009	1.04101	1.01602	1.05891
	35.7	0.98518	0.99108	0.973241	0.996209	0.990939	0.963792	0.9585	0.986208	0.998449	0.985982	1.0036	0.979843	0.990868	1.00378	0.973476	0.986967			35.7	1.03934	1.06308	1.05822	1.05304	1.03394	1.06433	1.04963	1.03687	1.06122	1.06136	1.04944	1.04432	1.03131	1.01838	1.00755	1.02643	1.0313	1.03923	1.00779	1.00302	1.04101	1.02203	1.06196
	35.8	0.985497	0.986951	0.970384	1.00191	0.984082	0.972507	0.95754	0.986208	1.00035	0.985035	1.00654	0.976609	0.993935	1.00959	0.966288	0.984039			35.8	1.03884	1.06308	1.0677	1.05794	1.03587	1.04609	1.04332	1.03943	1.07107	1.05758	1.05028	1.04432	1.02748	1.02037	1.00386	1.02643	1.03334	1.03622	1.00892	1.00302	1.04201	1.01722	1.05891
	35.9	0.98622	0.987777	0.967527	1.00975	0.984082	0.969021	0.959461	0.98725	0.996545	0.988824	1.00556	0.980921	0.992913	1.0125	0.97553	0.986967			35.9	1.03922	1.065	1.06511	1.05696	1.02913	1.06322	1.04648	1.04113	1.06544	1.06608	1.0486	1.04326	1.03131	1.01341	1.00847	1.02363	1.02823	1.03823	1.00892	1.00408	1.03803	1.01722	1.06095
	36	0.986091	0.991906	0.969431	0.993359	0.982367	0.965535	0.952738	0.98725	1.00035	0.985982	1.00065	0.976609	1.00007	1.01347	0.971422	0.986967			36	1.03913	1.06693	1.06511	1.05696	1.03394	1.04941	1.04805	1.03687	1.06122	1.06419	1.04944	1.04962	1.02748	1.01937	1.00755	1.02269	1.02823	1.03923	1.00892	1.00408	1.04002	1.01962	1.06196
	36.1	0.984348	0.991906	0.963718	0.983382	0.985796	0.971635	0.955619	0.98308	0.992738	0.981246	1.0036	0.976609	0.992913	1.00862	0.974503	0.986967			36.1	1.03918	1.06212	1.05736	1.05794	1.02913	1.0483	1.04805	1.03858	1.07037	1.06136	1.04609	1.04856	1.02844	1.01937	1.00847	1.02736	1.03232	1.04325	1.00666	1.00196	1.03803	1.02323	1.06502
	36.2	0.983478	0.989428	0.966575	0.997634	0.985796	0.969021	0.9585	0.982038	0.998449	0.977458	0.997711	0.973375	0.995981	1.00669	0.968341	0.985015			36.2	1.03966	1.06789	1.06425	1.06087	1.03298	1.05051	1.05121	1.03176	1.06685	1.06325	1.04525	1.04644	1.03227	1.01739	1.00847	1.02456	1.03334	1.03722	1.00779	1.00514	1.03803	1.02203	1.06502
	36.3	0.984461	0.989428	0.967527	1.01117	0.98751	0.972507	0.960421	0.986208	0.997497	0.978405	1.00164	0.975531	0.994958	1.00572	0.967315	0.985991			36.3	1.03849	1.06596	1.06425	1.06185	1.03491	1.04057	1.04332	1.03517	1.06614	1.06041	1.04525	1.04326	1.02652	1.01838	1.00478	1.02363	1.03334	1.03722	1.00892	1.00514	1.043	1.02082	1.064
	36.4	0.984568	0.986951	0.965622	1.00191	0.98751	0.964664	0.9585	0.979953	0.9994	0.979352	1.00065	0.976609	0.989845	1.00184	0.973476	0.98892			36.4	1.03904	1.065	1.06081	1.05598	1.03298	1.0472	1.04884	1.03943	1.06403	1.06892	1.04525	1.0422	1.02748	1.02534	1.00294	1.02736	1.03334	1.04124	1.01117	1.00514	1.03604	1.01722	1.06095
	36.5	0.983361	0.99108	0.972288	0.989796	0.983224	0.971635	0.9585	0.984123	1.00226	0.981246	0.999673	0.974453	0.988823	0.99409	0.970395	0.984039			36.5	1.03983	1.06885	1.06167	1.05794	1.03202	1.05936	1.04411	1.04454	1.07107	1.06325	1.04777	1.04644	1.02748	1.01341	1.00939	1.02736	1.03334	1.04325	1.00666	0.999841	1.03703	1.01842	1.06298
	36.6	0.984988	0.993558	0.976098	1.00547	0.984939	0.969021	0.960421	0.98308	1.00226	0.985035	1.00948	0.975531	0.990868	1.00669	0.976556	0.985015			36.6	1.03849	1.06308	1.05995	1.05989	1.02817	1.05107	1.04805	1.03602	1.07107	1.06892	1.04189	1.04114	1.02077	1.02037	1.00202	1.02829	1.03948	1.04023	1.00779	1.0009	1.03405	1.01962	1.064
	36.7	0.985903	0.985299	0.972288	1.00262	0.986653	0.965535	0.961381	0.982038	0.99369	0.980299	1.00654	0.974453	0.992913	1.00475	0.97861	0.985991			36.7	1.04083	1.06789	1.07028	1.06087	1.03394	1.06378	1.052	1.03943	1.07107	1.06514	1.04609	1.04432	1.03035	1.02136	1.00662	1.02736	1.03744	1.04023	1.01004	1.00196	1.03206	1.01602	1.05993
	36.8	0.984185	0.986125	0.969431	0.987658	0.985796	0.975992	0.95754	0.989335	0.998449	0.980299	1.00948	0.970141	0.989845	0.996996	0.970395	0.985015			36.8	1.03978	1.06308	1.06942	1.05696	1.03106	1.06101	1.04174	1.03858	1.06755	1.06325	1.04273	1.04856	1.03323	1.02136	1.00662	1.02829	1.03437	1.04325	1.00779	1.00302	1.03604	1.01722	1.05993
	36.9	0.983077	0.986125	0.969431	0.991221	0.986653	0.96815	0.953698	0.980995	0.995593	0.985035	1.00654	0.971219	0.9878	1.00087	0.972449	0.984039			36.9	1.0398	1.06308	1.05995	1.05892	1.02624	1.05991	1.04884	1.04199	1.0753	1.06703	1.04357	1.04326	1.03227	1.01341	1.00478	1.02923	1.03846	1.04325	1.0123	1.00302	1.03604	1.01482	1.05993
	37	0.98243	0.987777	0.966575	0.994784	0.986653	0.971635	0.955619	0.980995	0.99369	0.980299	1.00262	0.972297	0.985755	0.998934	0.971422	0.984039			37	1.03893	1.05924	1.06511	1.05598	1.02913	1.06267	1.04332	1.04369	1.06051	1.06608	1.03938	1.05386	1.0294	1.02136	1.00294	1.02643	1.03744	1.04023	1.01343	1.0062	1.03405	1.01122	1.05483
	37.1	0.983579	0.990254	0.970384	1.00048	0.982367	0.971635	0.955619	0.986208	0.998449	0.985035	1.00752	0.973375	0.99189	1.00765	0.969368	0.984039			37.1	1.03949	1.065	1.06253	1.05892	1.03202	1.06157	1.04727	1.04199	1.06685	1.06514	1.04357	1.05174	1.0294	1.01639	1.00662	1.03109	1.03437	1.03923	1.00441	1.0009	1.03504	1.01482	1.05993
	37.2	0.984333	0.987777	0.967527	0.999059	0.983224	0.967278	0.955619	0.986208	0.995593	0.984088	0.998692	0.974453	0.995981	1.00669	0.971422	0.982086			37.2	1.03853	1.0602	1.05995	1.05892	1.02913	1.05328	1.0449	1.04028	1.06262	1.06514	1.04105	1.05174	1.03323	1.01937	1.00478	1.02643	1.04051	1.04124	1.00441	0.998782	1.03703	1.01482	1.05993
	37.3	0.983724	0.992732	0.967527	0.996209	0.984939	0.96815	0.959461	0.984123	0.996545	0.979352	1.00164	0.973375	0.986777	1.00378	0.973476	0.987944			37.3	1.03841	1.06116	1.05995	1.055	1.03587	1.05825	1.03937	1.03687	1.06403	1.07081	1.04105	1.0528	1.0294	1.02037	1.00202	1.02643	1.03948	1.03823	1.00441	0.998782	1.03604	1.01482	1.05993
	37.4	0.983514	0.985299	0.968479	0.998347	0.985796	0.970764	0.95754	0.979953	0.994641	0.976511	0.997711	0.972297	0.997003	1.00959	0.971422	0.984039			37.4	1.03871	1.06596	1.06511	1.05696	1.03009	1.06378	1.04648	1.03773	1.06262	1.06136	1.04777	1.05174	1.03035	1.0154	1.00294	1.02643	1.03846	1.03722	1.00553	1.0009	1.03206	1.01482	1.05789
	37.5	0.982502	0.991906	0.965622	1.0012	0.98151	0.96205	0.954659	0.980995	0.996545	0.978405	1.00065	0.967985	0.99189	1.00475	0.968341	0.979158			37.5	1.03647	1.05348	1.05908	1.05011	1.02432	1.04057	1.0449	1.03858	1.06122	1.06514	1.04357	1.05174	1.02748	1.0154	1.00294	1.02736	1.03846	1.04023	1.00779	1.00514	1.03206	1.01482	1.05789
	37.6	0.983273	0.988603	0.967527	1.01189	0.983224	0.971635	0.9585	0.988293	0.996545	0.978405	1.00458	0.974453	0.985755	1.00572	0.971422	0.985991			37.6	1.03813	1.06212	1.05908	1.055	1.02721	1.05604	1.05752	1.04199	1.04854	1.06419	1.05112	1.05386	1.0294	1.01341	1.00478	1.02549	1.03539	1.03421	1.01004	1.00302	1.03504	1.01242	1.05891
	37.7	0.984889	0.987777	0.960861	1.01331	0.984082	0.969892	0.95754	0.98308	0.996545	0.982194	1.00654	0.970141	0.994958	1.00765	0.97553	0.984039			37.7	1.03872	1.065	1.06597	1.055	1.02817	1.05825	1.04253	1.0275	1.05558	1.05947	1.05196	1.05704	1.03419	1.02037	1.0057	1.02923	1.03948	1.04023	1.00328	1.00514	1.03405	1.01482	1.05891
	37.8	0.984131	0.993558	0.96467	0.999772	0.980653	0.967278	0.953698	0.982038	0.997497	0.984088	1.0085	0.970141	0.9878	1.00765	0.969368	0.983062			37.8	1.03931	1.06693	1.07028	1.06185	1.03106	1.04278	1.052	1.02921	1.06333	1.06514	1.0486	1.05704	1.03706	1.01937	1.00939	1.02643	1.03437	1.03923	1.00215	1.00302	1.03305	1.01362	1.05891
	37.9	0.983191	0.987777	0.971336	0.994784	0.984939	0.971635	0.95754	0.982038	0.992738	0.980299	1.00752	0.972297	0.99189	1.00475	0.966288	0.980134			37.9	1.03879	1.05828	1.05822	1.05304	1.02721	1.05604	1.0449	1.03176	1.06122	1.06797	1.04525	1.05916	1.03515	1.01639	1.00755	1.02923	1.04153	1.04626	1.00553	1.00514	1.02907	1.01362	1.06095
	38	0.983197	0.986125	0.968479	1.00048	0.983224	0.967278	0.956579	0.985165	0.998449	0.979352	1.00556	0.971219	0.990868	1.00475	0.969368	0.983062			38	1.03914	1.06212	1.06081	1.05892	1.03009	1.06212	1.04727	1.03006	1.06192	1.06703	1.04441	1.05916	1.03706	1.02434	1.00478	1.02736	1.03846	1.03622	0.999899	1.00196	1.03106	1.01602	1.05993
	38.1	0.983275	0.99108	0.969431	0.991933	0.979795	0.969021	0.951777	0.98725	0.9994	0.980299	1.00262	0.973375	0.99189	1.00281	0.97553	0.982086			38.1	1.03668	1.05444	1.0522	1.04913	1.02336	1.0483	1.04648	1.03687	1.05417	1.06136	1.04693	1.05916	1.03515	1.01838	1.00478	1.03016	1.04255	1.03622	1.00441	1.0062	1.03206	1.00882	1.05585
	38.2	0.982621	0.985299	0.963718	0.999059	0.984939	0.963792	0.953698	0.98308	0.992738	0.978405	0.998692	0.974453	0.994958	1.00087	0.97553	0.98111			38.2	1.0363	1.05732	1.05995	1.05206	1.02432	1.03615	1.04332	1.03261	1.0591	1.06797	1.05448	1.05704	1.03227	1.01639	1.0057	1.02829	1.03437	1.04023	0.998771	0.999841	1.03007	1.01242	1.05585
	38.3	0.982693	0.989428	0.968479	1.00191	0.984082	0.965535	0.950817	0.979953	0.992738	0.977458	1.00262	0.975531	0.992913	1.0125	0.972449	0.984039			38.3	1.03796	1.06212	1.06339	1.05011	1.02143	1.0588	1.04648	1.03517	1.04854	1.06608	1.05448	1.06022	1.03035	1.01739	1.00386	1.02923	1.03846	1.04224	1.00215	1.00408	1.02907	1.01362	1.05789
	38.4	0.983332	0.987777	0.967527	0.995496	0.984939	0.969021	0.952738	0.98308	0.996545	0.979352	1.00262	0.974453	0.988823	1.01153	0.974503	0.98111			38.4	1.03777	1.05828	1.06253	1.05304	1.02624	1.05383	1.0449	1.03091	1.05276	1.06514	1.0486	1.06022	1.03323	1.01838	1.00478	1.02923	1.03846	1.03923	1.00553	1.0062	1.02907	1.01242	1.05789
	38.5	0.983891	0.989428	0.971336	0.991933	0.986653	0.975992	0.954659	0.982038	0.9994	0.973669	1.00458	0.974453	0.994958	1.0125	0.974503	0.98111			38.5	1.03775	1.05828	1.06081	1.055	1.02624	1.04278	1.04411	1.04199	1.06192	1.06419	1.05028	1.05704	1.03611	1.01838	1.0057	1.02549	1.03846	1.03722	1.00328	1.00514	1.02409	1.01602	1.05789
	38.6	0.983589	0.986951	0.967527	0.994071	0.979795	0.96815	0.953698	0.979953	0.994641	0.975564	1.0036	0.975531	0.994958	1.01056	0.971422	0.984039			38.6	1.03923	1.06308	1.06942	1.05892	1.02913	1.05494	1.0449	1.04113	1.06051	1.05947	1.05196	1.06128	1.03898	1.01937	1.00294	1.02176	1.03744	1.03722	1.00553	1.00831	1.0221	1.01482	1.05993
	38.7	0.983017	0.988603	0.967527	0.999059	0.984082	0.96815	0.952738	0.97891	0.995593	0.975564	1.00458	0.973375	0.994958	1.01347	0.970395	0.983062			38.7	1.04042	1.06404	1.07286	1.05304	1.02624	1.0682	1.05989	1.04028	1.0591	1.0623	1.0528	1.05704	1.0409	1.01043	1.00294	1.02549	1.03437	1.03823	1.00328	1.0062	1.02708	1.01842	1.06604
	38.8	0.98317	0.982821	0.967527	0.995496	0.980653	0.970764	0.952738	0.986208	0.998449	0.976511	1.0036	0.972297	0.993935	1.0125	0.971422	0.980134			38.8	1.0396	1.06308	1.06597	1.05696	1.02817	1.05659	1.052	1.04028	1.06403	1.06797	1.0528	1.06128	1.0294	1.01739	1.0011	1.02829	1.03744	1.04124	1.00215	1.00302	1.0231	1.01482	1.064
	38.9	0.982244	0.988603	0.968479	0.994071	0.975509	0.971635	0.954659	0.982038	0.996545	0.970828	1.00556	0.971219	0.989845	1.00475	0.969368	0.979158			38.9	1.03989	1.05732	1.06856	1.04815	1.01565	1.07704	1.052	1.04199	1.0591	1.06986	1.04944	1.0634	1.03706	1.01937	1.0057	1.02923	1.03641	1.03923	1.00328	1.00514	1.02409	1.01362	1.06196
	39	0.981652	0.986125	0.966575	0.994784	0.978938	0.967278	0.953698	0.984123	0.997497	0.975564	1.00458	0.967985	0.990868	1.00959	0.973476	0.976229			39	1.03825	1.065	1.06683	1.05402	1.02432	1.04223	1.05042	1.03943	1.06474	1.06703	1.0486	1.0581	1.03706	1.01639	1.00478	1.02363	1.03641	1.03622	1.00553	1.01149	1.02011	1.01122	1.05789
	39.1	0.981621	0.985299	0.969431	0.997634	0.976367	0.96815	0.947936	0.97891	0.996545	0.979352	1.00556	0.969063	0.992913	1.00862	0.968341	0.977205			39.1	1.04006	1.06308	1.06511	1.05794	1.02817	1.06157	1.04963	1.04454	1.05558	1.06419	1.05196	1.06022	1.03802	1.02434	1.00478	1.02456	1.03437	1.0312	1.00666	1.00831	1.02708	1.01602	1.064
	39.2	0.981244	0.983647	0.966575	0.998347	0.984082	0.967278	0.945054	0.98308	0.992738	0.979352	1.0036	0.971219	0.986777	1.00378	0.969368	0.98111			39.2	1.03975	1.06885	1.06597	1.05402	1.02239	1.0588	1.052	1.03943	1.06333	1.06703	1.05112	1.06128	1.03994	1.01838	1.00478	1.02736	1.03539	1.03622	1.00553	1.00726	1.02409	1.01242	1.05891
	39.3	0.981673	0.983647	0.965622	0.994071	0.979795	0.966407	0.945054	0.986208	1.00416	0.981246	1.00262	0.973375	0.99189	1.01153	0.970395	0.978181			39.3	1.04033	1.065	1.06942	1.05989	1.02047	1.06543	1.05831	1.04113	1.06333	1.07175	1.04944	1.06234	1.04281	1.01639	1.0011	1.02456	1.03437	1.03722	1.00441	1.00937	1.02111	1.01242	1.05687
	39.4	0.98211	0.984473	0.971336	0.991221	0.983224	0.969892	0.949856	0.98308	0.997497	0.975564	0.993787	0.974453	0.9878	1.01637	0.970395	0.980134			39.4	1.03911	1.06212	1.06081	1.05304	1.02047	1.04333	1.05595	1.04113	1.06262	1.06703	1.05196	1.06234	1.03898	1.01739	1.00386	1.02923	1.03744	1.04224	1.00666	1.00831	1.0231	1.01242	1.05993
	39.5	0.980836	0.978692	0.970384	0.989796	0.978938	0.96205	0.944094	0.986208	1.00226	0.978405	0.995749	0.970141	0.992913	1.00087	0.967315	0.978181			39.5	1.0382	1.0602	1.06081	1.05304	1.02239	1.04886	1.04884	1.04113	1.07389	1.06325	1.04777	1.06446	1.03994	1.01838	0.999264	1.02083	1.03027	1.03521	1.00553	1.00514	1.0231	1.01602	1.06196
	39.6	0.980395	0.978692	0.966575	1.0012	0.980653	0.971635	0.950817	0.984123	0.9994	0.977458	0.997711	0.972297	0.99189	0.996028	0.966288	0.98111			39.6	1.04002	1.06308	1.06253	1.05598	1.02336	1.05494	1.06463	1.04199	1.07107	1.06892	1.04441	1.0634	1.04473	1.01838	1.00294	1.02456	1.03641	1.03823	1.00328	1.00514	1.02111	1.01242	1.05891
	39.7	0.981803	0.985299	0.972288	0.996922	0.980653	0.970764	0.949856	0.985165	1.00035	0.984088	1.0036	0.970141	0.986777	1.00184	0.969368	0.98111			39.7	1.03894	1.06212	1.06425	1.055	1.02239	1.05494	1.05279	1.04369	1.07248	1.0623	1.04777	1.0634	1.04281	1.01937	0.998344	1.02269	1.03334	1.03823	1.00328	1.00196	1.0221	1.01242	1.06095
	39.8	0.982237	0.981169	0.969431	0.996922	0.978938	0.969021	0.950817	0.98725	0.996545	0.984088	1.0036	0.972297	0.9878	1.00669	0.963207	0.98111			39.8	1.03805	1.06596	1.06425	1.05011	1.01758	1.0472	1.04805	1.04028	1.076	1.06514	1.05028	1.06552	1.04761	1.01043	1.00202	1.02083	1.03334	1.03622	0.998771	0.999841	1.02409	1.01362	1.05993
	39.9	0.981497	0.980344	0.960861	0.996922	0.98151	0.966407	0.952738	0.985165	0.9994	0.978405	0.998692	0.970141	0.993935	0.997965	0.972449	0.98111			39.9	1.03701	1.05924	1.06683	1.05304	1.02528	1.03559	1.05595	1.03943	1.06474	1.0623	1.04525	1.06234	1.04473	1.01739	1.00294	1.02176	1.03027	1.03823	1.00215	1.00302	1.01912	1.00882	1.05585
	40	0.981292	0.983647	0.963718	0.991221	0.98151	0.958564	0.949856	0.986208	0.9994	0.977458	1.00164	0.976609	0.9878	1.01056	0.972449	0.982086			40	1.03767	1.06693	1.06683	1.05402	1.02047	1.02233	1.05121	1.03602	1.07178	1.06419	1.04944	1.06658	1.03515	1.01838	0.998344	1.02829	1.03539	1.04023	1.00441	1.00302	1.0221	1.01362	1.05993
	40.1	0.982178	0.981169	0.966575	0.991221	0.986653	0.970764	0.954659	0.985165	0.99369	0.982194	1.0036	0.978765	0.99189	1.00281	0.970395	0.983062
	40.2	0.982157	0.981169	0.966575	0.998347	0.980653	0.967278	0.947936	0.98308	0.998449	0.976511	1.0036	0.970141	0.994958	1.00669	0.972449	0.974276
	40.3	0.981526	0.980344	0.967527	0.998347	0.979795	0.965535	0.950817	0.985165	0.995593	0.978405	0.998692	0.975531	0.986777	1.01056	0.971422	0.979158
	40.4	0.98192	0.97704	0.962765	0.994784	0.986653	0.96815	0.953698	0.982038	0.9994	0.981246	1.00458	0.973375	0.993935	1.00862	0.971422	0.976229
	40.5	0.982666	0.978692	0.967527	1.0069	0.984939	0.969021	0.954659	0.986208	1.00321	0.980299	1.00164	0.972297	0.99189	0.999903	0.976556	0.972324
	40.6	0.982114	0.977866	0.967527	0.989083	0.978938	0.967278	0.951777	0.986208	0.99369	0.981246	1.00065	0.972297	0.989845	1.01541	0.968341	0.977205
	40.7	0.981573	0.981995	0.967527	0.994071	0.979795	0.969021	0.946975	0.984123	0.994641	0.976511	0.999673	0.976609	0.989845	1.01734	0.974503	0.977205
	40.8	0.981339	0.981169	0.967527	1.00832	0.976367	0.966407	0.951777	0.984123	0.99369	0.972722	1.00164	0.971219	0.99189	0.999903	0.968341	0.975253
	40.9	0.980301	0.979518	0.961813	0.993359	0.982367	0.964664	0.951777	0.98308	0.991786	0.977458	0.999673	0.972297	0.986777	1.00862	0.967315	0.978181
	41	0.979968	0.979518	0.958956	0.986233	0.984939	0.969021	0.949856	0.98308	0.991786	0.971775	1.00065	0.974453	0.9878	1.01056	0.974503	0.977205
	41.1	0.979048	0.978692	0.960861	0.994071	0.977224	0.965535	0.950817	0.977868	0.989882	0.969881	0.992806	0.973375	0.989845	1.01056	0.968341	0.971348
	41.2	0.978274	0.97704	0.961813	0.999059	0.979795	0.966407	0.949856	0.982038	0.989882	0.962303	1.00065	0.971219	0.9878	1.00765	0.967315	0.974276
	41.3	0.978627	0.981169	0.96467	0.996209	0.984082	0.96815	0.947936	0.982038	0.98893	0.968934	0.995749	0.966907	0.989845	1.00765	0.963207	0.976229
	41.4	0.979339	0.985299	0.968479	0.998347	0.974652	0.96815	0.949856	0.980995	0.99369	0.967986	0.997711	0.972297	0.985755	1.00765	0.970395	0.977205
	41.5	0.98	0.981995	0.967527	0.991933	0.983224	0.967278	0.956579	0.98308	0.990834	0.969881	0.995749	0.972297	0.990868	1.00669	0.968341	0.975253
	41.6	0.979393	0.984473	0.967527	0.979107	0.980653	0.96815	0.949856	0.97891	0.995593	0.970828	0.99673	0.973375	0.985755	1.00572	0.968341	0.975253
	41.7	0.978479	0.982821	0.966575	0.98837	0.977224	0.973378	0.950817	0.980995	0.990834	0.971775	0.99673	0.969063	0.9878	0.996996	0.969368	0.971348
	41.8	0.978519	0.988603	0.967527	0.989796	0.978081	0.966407	0.952738	0.98308	0.992738	0.973669	0.997711	0.964752	0.988823	0.998934	0.966288	0.972324
	41.9	0.979217	0.982821	0.961813	0.984095	0.980653	0.965535	0.952738	0.982038	0.990834	0.971775	0.998692	0.971219	0.98371	1.01541	0.97553	0.978181
	42	0.980427	0.984473	0.968479	0.992646	0.98151	0.961178	0.946015	0.985165	0.991786	0.976511	0.999673	0.974453	0.988823	1.01637	0.973476	0.977205
	42.1	0.981234	0.981169	0.971336	0.998347	0.979795	0.969021	0.951777	0.98308	0.991786	0.972722	0.993787	0.973375	0.990868	1.0125	0.973476	0.976229
	42.2	0.979667	0.977866	0.963718	0.984807	0.977224	0.965535	0.950817	0.97891	0.987027	0.971775	0.991825	0.967985	0.99189	1.00765	0.97553	0.978181
	42.3	0.977804	0.981169	0.963718	0.98837	0.973795	0.963792	0.941213	0.97891	0.99369	0.971775	0.990844	0.971219	0.984732	1.01347	0.971422	0.975253
	42.4	0.978622	0.981995	0.963718	0.986233	0.978938	0.967278	0.948896	0.979953	0.987979	0.969881	0.990844	0.976609	0.990868	1.01541	0.976556	0.980134
	42.5	0.979214	0.979518	0.961813	0.989796	0.980653	0.969021	0.952738	0.977868	0.991786	0.972722	0.988882	0.971219	0.990868	1.00959	0.970395	0.974276
	42.6	0.979023	0.984473	0.966575	0.986945	0.979795	0.965535	0.943133	0.982038	0.991786	0.971775	0.985939	0.974453	0.990868	1.01153	0.97553	0.979158
	42.7	0.97954	0.983647	0.965622	0.989796	0.98151	0.96815	0.951777	0.977868	0.991786	0.967986	0.993787	0.971219	0.997003	1.00378	0.97553	0.977205
	42.8	0.980458	0.982821	0.969431	0.993359	0.978081	0.969892	0.954659	0.980995	0.992738	0.973669	0.987901	0.975531	0.988823	1.01444	0.976556	0.978181
	42.9	0.980422	0.980344	0.965622	0.993359	0.979795	0.964664	0.946975	0.980995	0.989882	0.967039	0.994768	0.976609	0.992913	1.00572	0.980664	0.976229
	43	0.979667	0.981995	0.959909	0.989796	0.978081	0.962921	0.945054	0.980995	0.992738	0.971775	0.991825	0.971219	0.993935	1.01541	0.979637	0.979158
	43.1	0.979817	0.984473	0.960861	0.996209	0.978081	0.965535	0.952738	0.98308	0.991786	0.968934	0.995749	0.973375	0.992913	1.00765	0.972449	0.976229
	43.2	0.979523	0.985299	0.963718	0.994784	0.978938	0.965535	0.952738	0.977868	0.987979	0.973669	0.994768	0.967985	0.990868	1.00475	0.972449	0.974276
	43.3	0.979378	0.986125	0.959909	0.991933	0.979795	0.96815	0.949856	0.976825	0.991786	0.971775	0.994768	0.967985	0.988823	1.01734	0.972449	0.978181
	43.4	0.978638	0.986125	0.960861	0.986233	0.973795	0.960307	0.949856	0.977868	0.986075	0.971775	1.00164	0.969063	0.98371	1.0125	0.969368	0.974276
	43.5	0.978354	0.987777	0.959909	0.996209	0.984082	0.969892	0.955619	0.976825	0.984171	0.971775	0.998692	0.966907	0.990868	1.00475	0.968341	0.971348
	43.6	0.979622	0.986951	0.963718	0.991221	0.978938	0.967278	0.948896	0.982038	0.991786	0.970828	0.997711	0.973375	0.984732	1.01637	0.971422	0.976229
	43.7	0.979112	0.984473	0.961813	0.98552	0.975509	0.96205	0.950817	0.975783	0.982268	0.971775	0.998692	0.970141	0.990868	1.01347	0.972449	0.976229
	43.8	0.978086	0.981169	0.963718	0.992646	0.972938	0.957692	0.946015	0.97891	0.98893	0.971775	0.997711	0.971219	0.9878	1.0125	0.972449	0.975253
	43.9	0.97854	0.981995	0.961813	0.983382	0.974652	0.964664	0.951777	0.985165	0.994641	0.975564	0.997711	0.970141	0.980642	1.01153	0.976556	0.975253
	44	0.978498	0.981995	0.954195	0.984807	0.980653	0.96205	0.948896	0.97891	0.987027	0.972722	0.990844	0.975531	0.988823	1.01541	0.970395	0.977205
	44.1	0.977004	0.981995	0.958004	0.989796	0.975509	0.960307	0.946015	0.977868	0.98893	0.967986	0.991825	0.965829	0.994958	1.00184	0.970395	0.969395
	44.2	0.977485	0.985299	0.959909	0.992646	0.976367	0.967278	0.948896	0.98308	0.997497	0.971775	0.992806	0.965829	0.98371	1.01928	0.965261	0.974276
	44.3	0.978349	0.986951	0.96467	0.986945	0.972081	0.959435	0.942173	0.979953	0.987979	0.972722	0.999673	0.969063	0.986777	1.01541	0.970395	0.972324
	44.4	0.977822	0.987777	0.963718	0.98837	0.972938	0.964664	0.948896	0.97891	0.985123	0.975564	0.999673	0.964752	0.985755	1.01444	0.964234	0.9733
	44.5	0.978114	0.983647	0.958956	0.991933	0.974652	0.963792	0.949856	0.985165	0.98893	0.965145	0.999673	0.965829	0.986777	1.01541	0.968341	0.977205
	44.6	0.979076	0.983647	0.96467	1.0012	0.978938	0.964664	0.950817	0.979953	0.987979	0.965145	1.00458	0.971219	0.988823	1.01153	0.972449	0.971348
	44.7	0.978845	0.979518	0.963718	0.994784	0.982367	0.965535	0.943133	0.984123	0.98322	0.966092	1.00458	0.964752	0.986777	1.01734	0.960127	0.972324
	44.8	0.97853	0.981995	0.970384	0.990508	0.980653	0.964664	0.947936	0.98308	0.98322	0.967986	1.00458	0.967985	0.984732	1.01928	0.965261	0.975253
	44.9	0.978989	0.980344	0.968479	0.994784	0.978938	0.964664	0.948896	0.98308	0.982268	0.965145	1.00065	0.967985	0.989845	1.01347	0.968341	0.975253
	45	0.978333	0.977866	0.968479	0.999772	0.978081	0.96205	0.945054	0.982038	0.984171	0.960409	1.00262	0.963674	0.9878	1.01831	0.964234	0.9733
	45.1	0.978402	0.97704	0.967527	0.999059	0.977224	0.965535	0.945054	0.986208	0.989882	0.966092	1.00262	0.967985	0.986777	1.01444	0.969368	0.969395
	45.2	0.978609	0.974562	0.968479	0.989083	0.983224	0.959435	0.944094	0.984123	0.992738	0.963251	1.00654	0.963674	0.9878	1.01444	0.968341	0.974276
	45.3	0.978165	0.978692	0.972288	0.992646	0.98151	0.964664	0.938331	0.982038	0.991786	0.963251	1.00164	0.967985	0.985755	1.00959	0.969368	0.971348
	45.4	0.977668	0.978692	0.974193	0.991221	0.972081	0.959435	0.944094	0.980995	0.987027	0.957568	1.00164	0.969063	0.984732	1.01056	0.97553	0.972324
	45.5	0.977747	0.978692	0.972288	0.998347	0.972938	0.96205	0.942173	0.98308	0.99369	0.960409	0.999673	0.965829	0.988823	1.01153	0.971422	0.972324
	45.6	0.977893	0.97704	0.965622	0.994071	0.975509	0.964664	0.941213	0.984123	0.996545	0.967039	0.994768	0.966907	0.98371	1.00765	0.970395	0.974276
	45.7	0.977832	0.981169	0.968479	1.00476	0.974652	0.96205	0.943133	0.982038	0.986075	0.961356	0.999673	0.965829	0.988823	1.01153	0.972449	0.969395
	45.8	0.977667	0.986951	0.970384	0.991933	0.977224	0.964664	0.946975	0.976825	0.98893	0.969881	0.994768	0.966907	0.98371	1.00572	0.966288	0.967443
	45.9	0.976987	0.984473	0.969431	0.991221	0.970366	0.957692	0.943133	0.98308	0.99369	0.965145	0.99673	0.964752	0.986777	0.998934	0.969368	0.976229
	46	0.977667	0.986951	0.975145	0.989083	0.977224	0.961178	0.945054	0.979953	0.989882	0.971775	0.997711	0.967985	0.982687	1.01056	0.972449	0.971348
	46.1	0.975873	0.987777	0.970384	0.978394	0.961794	0.944621	0.929688	0.97474	0.985123	0.968934	0.993787	0.965829	0.99189	1.00959	0.965261	0.969395
	46.2	0.975155	0.982821	0.970384	0.997634	0.978938	0.960307	0.946015	0.982038	0.990834	0.968934	0.992806	0.964752	0.985755	1.00475	0.960127	0.971348
	46.3	0.977577	0.981169	0.970384	0.990508	0.979795	0.960307	0.948896	0.980995	0.987979	0.965145	0.998692	0.969063	0.982687	1.0125	0.970395	0.971348
	46.4	0.977326	0.984473	0.973241	0.998347	0.978081	0.959435	0.941213	0.980995	0.989882	0.958515	0.997711	0.964752	0.988823	1.00184	0.963207	0.969395
	46.5	0.976919	0.981995	0.972288	1.00191	0.979795	0.962921	0.948896	0.976825	0.987027	0.956621	0.995749	0.962596	0.985755	1.00862	0.966288	0.970371
	46.6	0.976919	0.981169	0.963718	0.996922	0.971223	0.956821	0.946975	0.977868	0.98893	0.957568	0.999673	0.965829	0.988823	1.00765	0.972449	0.974276
	46.7	0.977604	0.985299	0.970384	0.993359	0.98151	0.957692	0.948896	0.98308	0.991786	0.961356	0.994768	0.966907	0.989845	1.00959	0.971422	0.972324
	46.8	0.978108	0.981995	0.966575	0.996922	0.974652	0.958564	0.943133	0.979953	0.992738	0.958515	0.99673	0.966907	0.9878	1.00862	0.97861	0.9733
	46.9	0.977644	0.986951	0.970384	0.995496	0.984082	0.962921	0.948896	0.975783	0.987027	0.954726	0.99673	0.967985	0.986777	1.00572	0.971422	0.969395
	47	0.976755	0.983647	0.96467	0.983382	0.972081	0.954207	0.943133	0.979953	0.98893	0.956621	0.998692	0.964752	0.990868	1.01153	0.97553	0.970371
	47.1	0.975834	0.983647	0.967527	0.991221	0.975509	0.951593	0.944094	0.97891	0.98893	0.958515	0.994768	0.965829	0.9878	1.00765	0.968341	0.972324
	47.2	0.974696	0.979518	0.968479	0.981957	0.972081	0.956821	0.942173	0.979953	0.98322	0.958515	0.994768	0.962596	0.988823	1.00184	0.961153	0.972324
	47.3	0.974307	0.980344	0.967527	0.991933	0.975509	0.961178	0.942173	0.975783	0.985123	0.949043	1.00262	0.965829	0.981665	1.00959	0.966288	0.970371
	47.4	0.975794	0.985299	0.966575	0.996209	0.978938	0.958564	0.944094	0.977868	0.987979	0.959462	0.999673	0.966907	0.985755	1.00475	0.968341	0.968419
	47.5	0.976699	0.981995	0.965622	1.0012	0.972938	0.962921	0.942173	0.977868	0.987979	0.957568	0.999673	0.966907	0.986777	1.00765	0.972449	0.968419
	47.6	0.976608	0.986125	0.968479	0.998347	0.971223	0.956821	0.937371	0.979953	0.98893	0.962303	0.995749	0.966907	0.98371	1.01153	0.967315	0.971348
	47.7	0.975653	0.982821	0.967527	0.989796	0.972938	0.961178	0.946015	0.976825	0.987027	0.953779	0.992806	0.965829	0.98371	1.00765	0.964234	0.971348
	47.8	0.974783	0.975388	0.96467	0.994784	0.975509	0.95595	0.939292	0.977868	0.986075	0.957568	0.990844	0.966907	0.9878	1.00765	0.968341	0.971348
	47.9	0.974526	0.974562	0.966575	0.995496	0.974652	0.960307	0.941213	0.977868	0.986075	0.958515	0.992806	0.96044	0.990868	1.00669	0.964234	0.96549
	48	0.975401	0.97704	0.967527	0.990508	0.978081	0.96205	0.945054	0.980995	0.989882	0.952832	0.997711	0.965829	0.980642	1.01928	0.970395	0.968419
	48.1	0.976162	0.981169	0.963718	0.983382	0.969509	0.959435	0.945054	0.980995	0.987027	0.957568	0.995749	0.969063	0.986777	1.01444	0.971422	0.9733
	48.2	0.975661	0.976214	0.960861	0.997634	0.972938	0.959435	0.944094	0.976825	0.987027	0.959462	0.997711	0.967985	0.988823	1.00765	0.963207	0.971348
	48.3	0.975147	0.980344	0.968479	0.989083	0.967794	0.954207	0.945054	0.97891	0.984171	0.955673	0.997711	0.966907	0.986777	1.01444	0.964234	0.969395
	48.4	0.975119	0.97704	0.968479	0.991933	0.978938	0.962921	0.944094	0.975783	0.984171	0.958515	0.995749	0.964752	0.982687	1.00765	0.967315	0.970371
	48.5	0.975105	0.973736	0.966575	0.994071	0.972938	0.957692	0.944094	0.976825	0.984171	0.957568	0.993787	0.969063	0.984732	1.00959	0.971422	0.966467
	48.6	0.974854	0.977866	0.961813	0.996209	0.974652	0.957692	0.941213	0.973698	0.980364	0.956621	0.997711	0.966907	0.98371	1.01347	0.974503	0.966467
	48.7	0.975224	0.978692	0.965622	0.989083	0.976367	0.96205	0.945054	0.979953	0.980364	0.955673	0.993787	0.965829	0.989845	1.00862	0.973476	0.969395
	48.8	0.976168	0.978692	0.96467	1.00048	0.974652	0.96205	0.944094	0.979953	0.985123	0.954726	0.994768	0.969063	0.985755	1.01444	0.971422	0.971348
	48.9	0.976187	0.974562	0.96467	1.00333	0.977224	0.959435	0.946975	0.975783	0.981316	0.954726	0.998692	0.962596	0.986777	1.01153	0.968341	0.968419
	49	0.975102	0.976214	0.962765	0.993359	0.972938	0.956821	0.947936	0.97474	0.978461	0.951885	0.990844	0.964752	0.988823	1.01637	0.971422	0.971348
	49.1	0.974986	0.979518	0.96467	1.00048	0.977224	0.960307	0.941213	0.979953	0.981316	0.956621	0.989863	0.964752	0.98371	1.01056	0.969368	0.971348
	49.2	0.975441	0.975388	0.963718	1.00191	0.979795	0.959435	0.948896	0.97891	0.980364	0.952832	0.991825	0.965829	0.985755	1.00572	0.974503	0.967443
	49.3	0.975418	0.97704	0.958004	1.00048	0.977224	0.957692	0.944094	0.980995	0.984171	0.952832	0.987901	0.966907	0.98371	1.01347	0.971422	0.974276
	49.4	0.974714	0.973736	0.962765	1.0012	0.967794	0.954207	0.937371	0.977868	0.981316	0.952832	0.992806	0.967985	0.986777	1.00475	0.97553	0.974276
	49.5	0.974411	0.97291	0.962765	1.00048	0.978081	0.958564	0.938331	0.979953	0.980364	0.951885	0.987901	0.967985	0.985755	1.01444	0.969368	0.972324
	49.6	0.973429	0.974562	0.95229	0.986233	0.972081	0.950721	0.938331	0.977868	0.979412	0.955673	0.993787	0.965829	0.986777	1.01153	0.966288	0.970371
	49.7	0.972573	0.979518	0.958956	0.987658	0.972938	0.959435	0.943133	0.979953	0.982268	0.948096	0.995749	0.96044	0.9878	1.00669	0.967315	0.96549
	49.8	0.973455	0.975388	0.96467	0.990508	0.970366	0.954207	0.945054	0.977868	0.979412	0.956621	0.995749	0.969063	0.97962	1.00765	0.976556	0.96549
	49.9	0.973482	0.974562	0.963718	0.997634	0.972081	0.953335	0.939292	0.977868	0.977509	0.960409	1.00065	0.959362	0.98371	1.01444	0.9591	0.962562
	50	0.973026	0.981169	0.965622	0.984095	0.965223	0.956821	0.942173	0.977868	0.981316	0.954726	1.00262	0.962596	0.971439	1.00765	0.979637	0.961585
	50.1	0.97257	0.978692	0.962765	0.984095	0.96608	0.95595	0.945054	0.973698	0.976557	0.959462	0.995749	0.963674	0.976552	1.01153	0.965261	0.967443
	50.2	0.97196	0.97704	0.961813	0.989083	0.965223	0.948978	0.936411	0.975783	0.978461	0.962303	1.00164	0.961518	0.980642	1.00475	0.963207	0.969395
	50.3	0.972387	0.97704	0.959909	0.986233	0.970366	0.952464	0.943133	0.97891	0.979412	0.957568	0.998692	0.963674	0.980642	1.00862	0.968341	0.970371
	50.4	0.973246	0.978692	0.967527	0.994071	0.958365	0.946364	0.931608	0.977868	0.980364	0.959462	0.99673	0.969063	0.981665	1.01444	0.973476	0.972324
	50.5	0.974408	0.984473	0.962765	0.991221	0.967794	0.948107	0.93449	0.99142	0.986075	0.955673	0.995749	0.967985	0.981665	1.02025	0.967315	0.975253
	50.6	0.977622	0.990254	0.971336	1.00333	0.982367	0.960307	0.939292	0.997675	0.98893	0.956621	0.999673	0.974453	0.962236	1.02219	0.974503	0.975253
	50.7	0.981573	0.99108	0.976098	1.01402	0.980653	0.957692	0.938331	0.993505	0.991786	0.958515	0.999673	0.971219	0.98371	1.03091	0.976556	0.985015
	50.8	0.983655	0.993558	0.972288	1.01402	0.984939	0.960307	0.944094	0.994548	0.990834	0.961356	0.99673	0.976609	0.989845	1.02219	0.97553	0.984039
	50.9	0.985427	1.00595	0.981811	1.02186	0.989225	0.957692	0.944094	0.998718	0.990834	0.961356	0.997711	0.973375	0.986777	1.02606	0.976556	0.989896
	51	0.989047	1.00099	0.982764	1.01972	0.99694	0.963792	0.946975	1.00602	0.9994	0.957568	0.998692	0.98631	0.989845	1.03575	0.990933	0.993801
	51.1	0.991558	1.00182	0.983716	1.01687	1.0038	0.967278	0.946015	1.00706	1.00035	0.954726	0.999673	0.985232	0.985755	1.04544	0.983745	0.995753
	51.2	0.993449	1.00925	0.986573	1.02329	1.00637	0.972507	0.949856	1.01123	1.00321	0.958515	0.982014	0.990622	0.997003	1.04835	0.986825	1.00063
	51.3	0.996362	1.0076	0.991334	1.02756	1.01151	0.972507	0.950817	1.01019	1.00892	0.959462	0.997711	0.993856	0.995981	1.03866	0.992986	1.00552
	51.4	0.999545	1.01668	0.996096	1.03683	1.02094	0.976864	0.951777	1.01227	1.00416	0.961356	1.00065	0.99709	1.00109	1.04738	0.994013	1.00454
	51.5	1.00239	1.01503	0.994191	1.04467	1.02523	0.977735	0.953698	1.0154	1.00511	0.957568	1.00262	0.999245	1.00416	1.04253	1.00428	1.00844
	51.6	1.00421	1.01503	0.993239	1.05393	1.02523	0.982092	0.950817	1.01644	1.00797	0.959462	0.997711	1.00032	1.00927	1.05416	1.00017	1.0104
	51.7	1.00569	1.01751	0.993239	1.05678	1.03466	0.982092	0.95754	1.01853	1.00797	0.953779	1.00654	1.0014	1.00621	1.04447	1.00531	1.00844
	51.8	1.0074	1.02246	0.998	1.05678	1.04066	0.986449	0.959461	1.02165	1.01082	0.960409	1.00065	1.00571	1.00621	1.04253	1.00634	1.00942
	51.9	1.00832	1.01999	0.993239	1.05464	1.03894	0.989064	0.95754	1.02165	1.01177	0.957568	1.0036	1.00248	1.0103	1.04157	1.00634	1.01333
	52	1.00909	1.02412	0.998	1.05393	1.04752	0.991678	0.9585	1.01853	1.01273	0.959462	1.0085	1.00356	1.01234	1.04932	1.00223	1.0104
	52.1	1.01051	1.02577	0.998952	1.04965	1.0458	0.996035	0.963302	1.01644	1.01082	0.964198	1.00654	1.00464	1.01234	1.04932	1.00736	1.01333
	52.2	1.01096	1.02081	1.00467	1.05892	1.04409	0.992549	0.963302	1.0154	1.01558	0.964198	1.0085	1.00356	1.01439	1.04253	1.00531	1.0104
	52.3	1.01093	1.02329	0.998952	1.05179	1.04923	0.991678	0.960421	1.01331	1.01368	0.961356	1.01341	1.00248	1.01643	1.0561	1.0012	1.0104
	52.4	1.01135	1.01916	0.998	1.05678	1.0458	0.996035	0.968104	1.01331	1.01558	0.965145	1.02027	1.00356	1.00927	1.05222	1.00223	1.01137
	52.5	1.01315	1.01833	1.00276	1.06034	1.0518	0.999521	0.967144	1.00914	1.01273	0.976511	1.0242	1.00679	1.01439	1.05319	1.00839	1.01235
	52.6	1.01437	1.02164	1.00371	1.06391	1.05694	1.00039	0.968104	1.00914	1.01748	0.973669	1.02518	0.998168	1.01234	1.05319	0.999148	1.0104
	52.7	1.014	1.02246	0.994191	1.05179	1.0458	0.999521	0.969065	1.0081	1.01463	0.977458	1.02714	1.00571	1.02052	1.04738	1.01044	1.01235
	52.8	1.01394	1.02412	0.999905	1.0525	1.05094	1.00126	0.969065	1.0081	1.01653	0.978405	1.02812	1.00248	1.01643	1.05513	1.00223	1.00649
	52.9	1.01516	1.02659	1.00467	1.06604	1.04752	1.00301	0.970025	1.00706	1.01463	0.978405	1.03793	1.00248	1.02257	1.04932	1.00428	1.00844
	53	1.0177	1.02164	1.00848	1.06747	1.05694	1.00562	0.974827	1.01019	1.02224	0.986929	1.0399	1.00356	1.01439	1.05319	1.00839	1.0143
	53.1	1.01791	1.02907	1.00467	1.05749	1.05352	1.00823	0.968104	1.00497	1.01463	0.987876	1.04186	1.00032	1.0195	1.04738	1.00223	1.00942
	53.2	1.01703	1.02494	1.00371	1.06106	1.05352	1.00301	0.965223	1.00289	1.01939	0.992612	1.04578	1.00032	1.01643	1.05804	1.00634	1.00844
	53.3	1.01823	1.02577	1.00467	1.05749	1.05609	1.01259	0.970986	1.00393	1.01748	0.994507	1.04971	1.00571	1.01439	1.05416	1.00634	1.01137
	53.4	1.01905	1.02577	0.999905	1.06034	1.05009	1.01346	0.970986	1.00185	1.01558	0.994507	1.0448	1.00787	1.01643	1.05707	1.00839	1.01918
	53.5	1.01848	1.02329	1.00086	1.06533	1.0518	1.01695	0.973867	0.99559	1.01844	0.994507	1.04676	1.00464	1.01643	1.04835	0.999148	1.01235
	53.6	1.01856	1.02246	1.00467	1.06177	1.05694	1.01956	0.975788	0.99559	1.01844	0.998295	1.04186	1.00679	1.01643	1.05222	1.00531	1.01235
	53.7	1.01832	1.02412	0.998952	1.06034	1.05266	1.01346	0.969065	0.997675	1.01463	0.996401	1.04676	1.00571	1.01439	1.04932	1.00428	1.01333
	53.8	1.01747	1.02329	0.994191	1.06319	1.05609	1.01521	0.970025	0.992463	1.00892	1.00114	1.04676	1.00248	1.02154	1.05319	1.00017	1.0143
	53.9	1.01838	1.02412	1.00467	1.06248	1.05094	1.01956	0.970986	0.993505	1.01653	1.00587	1.04676	1.00571	1.01541	1.05125	1.00634	1.0143
	54	1.01923	1.02246	1.00657	1.05892	1.05523	1.01608	0.970025	0.996633	1.01558	1.00303	1.04578	1.00248	1.01439	1.06385	1.0012	1.01625
	54.1	1.01948	1.02329	1.00657	1.06676	1.05437	1.01695	0.967144	0.993505	1.01939	1.00398	1.04774	1.00356	1.02154	1.05125	1.00736	1.01235
	54.2	1.01942	1.0299	1.00848	1.06034	1.05266	1.01695	0.970986	0.99142	1.01748	1.00208	1.04872	1.00248	1.01439	1.05222	1.00634	1.01235
	54.3	1.01939	1.02494	1.00371	1.07246	1.05266	1.01956	0.971946	0.993505	1.01653	0.999242	1.04578	1.00356	1.01745	1.05707	1.00223	1.0143
	54.4	1.01977	1.02412	1.00467	1.06533	1.05352	1.02218	0.976748	0.99559	1.0232	0.997348	1.0448	1.00356	1.01541	1.0561	1.00326	1.01235
	54.5	1.02012	1.02825	1.00848	1.06747	1.05437	1.01695	0.968104	0.99559	1.01463	0.995454	1.04382	1.00356	1.01541	1.06579	1.01147	1.01625
	54.6	1.02057	1.02494	1.00943	1.06961	1.05352	1.02305	0.970986	0.994548	1.01939	1.00019	1.04382	1.00464	1.0195	1.05416	1.00736	1.01625
	54.7	1.01994	1.02742	1.00181	1.07317	1.05609	1.02392	0.974827	0.992463	1.02224	0.997348	1.04382	0.998168	1.01643	1.04544	1.0012	1.01235
	54.8	1.01961	1.03072	1.00752	1.06391	1.05352	1.02305	0.970986	0.99559	1.01939	0.995454	1.04872	1.0014	1.02154	1.05319	1.00326	1.01333
	54.9	1.02006	1.02825	1.00181	1.06533	1.05266	1.02392	0.971946	0.993505	1.01748	1.00019	1.04971	1.00032	1.01439	1.05901	1.00634	1.01528
	55	1.01945	1.02659	1.00371	1.06462	1.05437	1.02653	0.972907	0.988293	1.01368	0.997348	1.04382	1.00032	1.01439	1.05804	1.00736	1.01137
	55.1	1.0198	1.02577	1.00657	1.06818	1.05266	1.02915	0.976748	0.98725	1.01558	0.999242	1.04284	1.00571	1.01541	1.05901	1.00942	1.01723
	55.2	1.01929	1.02577	1.00752	1.04823	1.04494	1.01608	0.970986	0.993505	1.01748	0.999242	1.04088	1.0014	1.01848	1.06482	1.00428	1.0143
	55.3	1.01906	1.02246	1.00848	1.06533	1.05609	1.02043	0.971946	0.992463	1.01748	0.998295	1.04088	1.00571	1.02257	1.0561	1.00839	1.01723
	55.4	1.02037	1.02825	1.01038	1.05892	1.04752	1.02479	0.975788	0.988293	1.01844	0.999242	1.04676	1.00571	1.0195	1.05997	1.01147	1.01235
	55.5	1.02032	1.02246	1.00371	1.06319	1.05094	1.02479	0.976748	0.993505	1.0232	0.998295	1.0448	1.0014	1.02052	1.05997	1.00634	1.01235
	55.6	1.01888	1.02659	1.00181	1.05179	1.03809	1.02392	0.975788	0.992463	1.01463	0.998295	1.04186	1.00679	1.01745	1.05804	1.00326	1.01333
	55.7	1.01825	1.02825	1.00371	1.0525	1.0458	1.01869	0.975788	0.993505	1.01748	0.996401	1.04382	1.00356	1.01643	1.06385	1.00736	1.01625
	55.8	1.01867	1.02494	1.00371	1.04894	1.04409	1.01869	0.973867	0.992463	1.01748	1.00114	1.04284	1.00248	1.0195	1.06288	1.00634	1.01723
	55.9	1.0193	1.02412	1.01324	1.05678	1.0458	1.01869	0.975788	0.99142	1.01653	0.997348	1.04284	1.00464	1.02359	1.06191	1.00942	1.02016
	56	1.02003	1.02907	1.01514	1.05322	1.04494	1.02392	0.979629	0.993505	1.01653	0.997348	1.04676	1.00248	1.01745	1.0561	1.00326	1.01918
	56.1	1.01919	1.02164	1.00848	1.05963	1.04323	1.02131	0.971946	0.997675	1.01748	0.996401	1.04578	1.00032	1.01848	1.05416	1.00531	1.01528
	56.2	1.01816	1.01833	1.00657	1.06319	1.04666	1.02131	0.974827	0.992463	1.01463	0.995454	1.0448	1.00248	1.01439	1.05513	1.00223	1.01528
	56.3	1.0189	1.01999	1.00562	1.06319	1.05009	1.02741	0.979629	0.998718	1.02129	0.995454	1.04284	0.999245	1.01439	1.06869	1.00223	1.0104
	56.4	1.01985	1.02081	1.00086	1.05749	1.04323	1.02653	0.979629	1.0008	1.02129	0.995454	1.04186	1.00248	1.01541	1.06191	1.00736	1.02114
	56.5	1.01933	1.01833	1.00276	1.06177	1.04752	1.02043	0.975788	0.998718	1.01844	0.995454	1.03695	1.00356	1.01336	1.06579	1.01147	1.01333
	56.6	1.01846	1.02246	1.01133	1.05322	1.0398	1.01608	0.970986	1.00185	1.01748	0.997348	1.03303	1.00356	1.01541	1.06094	1.00942	1.01723
	56.7	1.01804	1.02081	1.00467	1.06034	1.04409	1.01782	0.970986	1.00185	1.01748	0.992612	1.03401	1.00032	1.01541	1.06094	1.01147	1.01821
	56.8	1.01906	1.02412	1.01228	1.07673	1.04837	1.02043	0.974827	0.998718	1.01748	0.997348	1.03597	1.00356	1.01745	1.05513	1.0012	1.01723
	56.9	1.02033	1.01999	1.00943	1.07459	1.0518	1.02305	0.982511	0.997675	1.01368	0.996401	1.03499	1.00679	1.01234	1.05997	1.01044	1.01528
	57	1.02031	1.02081	1.01133	1.07459	1.04666	1.02392	0.975788	0.997675	1.01558	0.996401	1.03499	1.00248	1.02052	1.05901	1.00326	1.01723
	57.1	1.01931	1.02412	1.01324	1.06248	1.04409	1.02131	0.971946	0.99559	1.01273	0.998295	1.03793	0.999245	1.0195	1.0561	1.00634	1.01625
	57.2	1.01908	1.02081	1.01324	1.06676	1.04923	1.02392	0.978669	0.996633	1.01273	1.00019	1.03793	0.998168	1.01643	1.06094	1.00223	1.01528
	57.3	1.01943	1.02081	1.01133	1.0582	1.04323	1.02305	0.973867	0.997675	1.02034	1.00019	1.0399	1.00248	1.01439	1.06191	1.00326	1.01918
	57.4	1.01956	1.02329	1.01324	1.06319	1.0518	1.02653	0.975788	0.998718	1.01653	0.993559	1.04284	1.00248	1.01439	1.05707	1.0012	1.01625
	57.5	1.01931	1.02164	1.01133	1.06248	1.0458	1.02043	0.976748	0.99976	1.01844	0.997348	1.03793	0.999245	1.01541	1.05222	1.00736	1.01625
	57.6	1.01922	1.02164	1.01228	1.06319	1.05009	1.01956	0.975788	0.99976	1.01558	0.992612	1.0399	1.00679	1.01643	1.05997	1.00634	1.0143
	57.7	1.01806	1.01833	1.00943	1.05607	1.0398	1.01869	0.970986	0.993505	1.01748	0.991665	1.03695	1.00356	1.01643	1.05513	1.00223	1.01723
	57.8	1.01722	1.02081	1.00943	1.06818	1.03894	1.02131	0.970025	0.996633	1.0232	0.992612	1.03891	0.994934	1.01643	1.06094	1.00428	1.01235
	57.9	1.01857	1.01833	1.00752	1.07103	1.0458	1.02131	0.978669	0.998718	1.01939	0.994507	1.03793	1.00032	1.01643	1.06191	0.999148	1.01723
	58	1.01858	1.02164	1.00848	1.05535	1.04923	1.02305	0.979629	0.992463	1.01558	0.991665	1.04186	1.00032	1.01234	1.05804	1.00326	1.01625
	58.1	1.01841	1.02329	1.01228	1.05892	1.04666	1.02566	0.977709	0.990378	1.01177	0.992612	1.04284	0.999245	1.01336	1.06579	1.00428	1.01821
	58.2	1.01817	1.01999	1.01038	1.05607	1.0458	1.01956	0.972907	0.992463	1.01273	0.995454	1.03793	0.999245	1.01336	1.06869	1.00223	1.01528
	58.3	1.01775	1.02081	1.01038	1.06676	1.04323	1.02043	0.974827	0.994548	1.01463	0.992612	1.03695	1.00032	1.01643	1.0561	1.00428	1.01821
	58.4	1.01893	1.02494	1.01133	1.07174	1.04494	1.02305	0.970025	0.997675	1.01653	0.995454	1.04578	1.0014	1.01234	1.05997	1.00017	1.02211
	58.5	1.0199	1.01999	1.00943	1.06961	1.04752	1.02653	0.978669	0.99559	1.02034	0.995454	1.03793	1.00248	1.01541	1.05707	1.00326	1.02016
	58.6	1.01935	1.01999	1.00752	1.07032	1.05009	1.02741	0.973867	0.99559	1.01558	0.991665	1.03597	0.999245	1.01643	1.06191	0.999148	1.01625
	58.7	1.01904	1.01916	1.00562	1.07673	1.04752	1.02566	0.978669	0.994548	1.02224	0.990718	1.03891	1.0014	1.01745	1.05416	1.00017	1.01723
	58.8	1.01791	1.01503	1.01228	1.05607	1.0398	1.02218	0.971946	0.997675	1.02129	0.992612	1.03891	0.993856	1.01745	1.06288	0.987852	1.01723
	58.9	1.01713	1.01833	1.01228	1.06177	1.0458	1.02566	0.976748	0.99559	1.02129	0.989771	1.03891	0.996012	1.01132	1.0561	0.999148	1.01821
	59	1.01697	1.02164	1.00848	1.05678	1.04151	1.02566	0.974827	0.993505	1.01939	0.989771	1.03401	0.993856	1.01439	1.05513	0.99504	1.01821
	59.1	1.01702	1.02412	1.00848	1.05322	1.04837	1.02566	0.974827	0.997675	1.01939	0.988824	1.04088	0.996012	1.01643	1.05804	1.00017	1.01625
	59.2	1.01742	1.02329	1.00752	1.0582	1.04666	1.01869	0.975788	0.992463	1.01368	0.996401	1.04088	0.994934	1.01234	1.05804	1.0012	1.0143
	59.3	1.01688	1.01833	1.00371	1.06818	1.04666	1.01956	0.973867	0.99142	1.01558	0.991665	1.0399	0.998168	1.01643	1.05901	0.997094	1.01235
	59.4	1.01628	1.01916	1.00562	1.06462	1.04409	1.01695	0.972907	0.994548	1.01082	0.990718	1.03597	0.99709	1.01439	1.05707	1.00017	1.01235
	59.5	1.01654	1.02081	1.01038	1.06248	1.0458	1.01956	0.972907	0.99976	1.01558	0.992612	1.04186	0.998168	1.0103	1.05804	0.999148	1.01235
	59.6	1.01681	1.01916	1.01038	1.05892	1.04323	1.01869	0.970986	0.994548	1.01273	0.993559	1.03793	0.999245	1.01336	1.05513	1.00326	1.01333
	59.7	1.01602	1.01833	1.00467	1.05607	1.04237	1.02043	0.974827	0.993505	1.00987	0.990718	1.03597	0.999245	1.01643	1.05319	1.00428	1.01625
	59.8	1.01561	1.01916	1.00562	1.05464	1.04237	1.02131	0.973867	0.994548	1.01558	0.990718	1.04088	0.996012	1.01541	1.04544	1.00428	1.01235
	59.9	1.01522	1.02081	1.00848	1.06818	1.03809	1.01608	0.967144	0.996633	1.01653	0.993559	1.03303	0.994934	1.01439	1.04738	0.994013	1.01528
	60	1.01479	1.01586	1.00848	1.05535	1.04494	1.01782	0.970025	0.993505	1.01463	0.987876	1.04088	0.992778	1.01132	1.04932	0.998121	1.01821
[truncated: 19 more columns]
