# Supplementary material for: FRET kinase sensor development reveals SnRK2/OST1 activation by ABA but not by MeJA and high CO2 during stomatal closure
Source: eLife. 2020 May 28;9:e56351. doi: 10.7554/eLife.56351 (PMC7289597; doi:10.7554/eLife.56351)
Supplement: Figure 8—source data 1. [file elife-56351-fig8-data1.xlsx]

## Sheet: Figure 8
		Normalized ratio												Normalized ratio																	Normalized ratio													Normalized ratio
Figure 8A	Time (min)	Stomate_1	Stomate_2	Stomate_3	Stomate_4	Stomate_5	Stomate_6	Stomate_7	Stomate_8	Stomate_9		Figure 8B	Time (min)	Stomate_1	Stomate_2	Stomate_3	Stomate_4	Stomate_5	Stomate_6	Stomate_7	Stomate_8	Stomate_9	Stomate_10	Stomate_11	Stomate_12	Stomate_13	Stomate_14		Figure 8C	Time (min)	Stomate_1	Stomate_2	Stomate_3	Stomate_4	Stomate_5	Stomate_6	Stomate_7	Stomate_8	Stomate_9	Stomate_10		Figure 8D	Time (min)	Stomate_1	Stomate_2	Stomate_3	Stomate_4	Stomate_5	Stomate_6
	0.1	0.984123	0.99369	1.00871	1.00262	0.996012	1.00007	0.999903	1.00531	1.00161			0.1	1.00181	0.994077	1.00191	1.00543	1.00745	1.00662	0.996566	1.00879	1.00509	0.997644	1.00196	1.00917	1.00281	1.00897			0.2	0.989577	0.991918	0.990581	0.984031	0.991683	1.00042	0.991365	0.989246	0.990338	0.993863			0.2	1.00473	0.999136	0.991092	0.99424	0.988909	0.994919
	0.2	0.980995	0.99369	1.00019	1.00065	0.999245	0.997003	0.995059	1.00428	0.99673			0.2	1.00087	0.993239	1.00297	1.0016	1.00845	1.00662	0.995633	1.00265	0.998062	1.00215	1.00408	1.00718	0.998006	1.00489			0.4	0.990748	0.995473	0.986522	0.984031	0.986351	0.998105	0.987846	0.991427	0.991542	0.990528			0.4	0.995848	1.00295	0.989869	0.991736	0.995372	0.988662
	0.3	0.985165	0.984171	1.00208	1.00065	0.999245	0.998026	0.996028	1.00223	1.00454			0.3	0.999924	0.9924	1.00403	1.00256	1.00546	1.00847	0.995633	1.00674	0.999066	0.996517	1.0009	1.00519	0.999207	1.00183			0.6	0.997775	0.999028	0.989228	0.989258	0.989017	0.995795	0.992538	0.994699	0.996362	0.992752			0.6	1.00029	1.00422	0.994763	0.991736	0.992787	0.99617
	0.4	0.988293	0.986075	1.00303	0.999673	0.99709	1.00007	0.999903	1.00634	1.00161			0.4	0.993309	0.999111	1.00085	1.0016	1.00546	1.00294	0.998432	1.00674	1.00308	0.996517	0.999841	1.00817	1.00041	1.00591			0.8	0.995433	1.00021	0.993288	0.990565	0.991683	0.998105	0.998404	0.988155	0.992747	0.993863			0.8	0.999178	1.00295	0.994763	0.99424	0.996665	0.997422
	0.5	0.988293	0.984171	1.00114	1.00065	1.00032	1.00212	0.996028	1.00428	1.00161			0.5	0.996144	0.994077	1.00191	1.00448	1.00546	1.00386	0.998432	1.00674	1.00208	0.997644	0.998782	1.00718	0.994403	0.999796			1	0.993091	0.996658	0.993288	0.989258	0.991683	0.992329	0.989019	0.989246	0.993952	0.993863			1	1.00029	1.00295	0.995987	0.996744	0.997958	0.99617
	0.6	0.99142	0.990834	1.00493	1.00164	1.00032	1.00007	0.999903	1.00736	1.00161			0.6	0.998034	0.994077	0.999788	1.00448	1.01043	1.00662	0.995633	1.00265	0.99505	0.993135	0.999841	1.00618	0.995604	0.999796			1.2	0.996604	0.999028	0.997348	0.990565	0.991683	0.992329	0.993712	0.992518	0.997566	0.987193			1.2	0.999178	1.00168	0.99354	0.992988	0.991494	0.988662
	0.7	0.98725	0.986075	0.999242	0.995749	0.999245	0.999048	0.990214	1.00223	1.00161			0.7	0.995199	0.999111	1.00297	1.00064	1.01441	1.00662	0.995633	1.00572	0.999066	0.994262	0.999841	1.00718	0.994403	1.00082			1.4	0.995433	1.00021	0.998701	0.993178	0.998347	0.99464	0.997231	0.997971	0.995157	0.996087			1.4	1.00029	1.00168	0.99354	0.99424	0.995372	0.994919
	0.8	0.98725	0.986075	0.999242	1.00065	0.998168	0.998026	0.997965	0.998121	1.00063			0.8	1.0056	0.997433	1.00191	1.00064	1.00845	1.0011	0.995633	1.00367	0.999066	0.996517	1.0009	1.00718	0.994403	0.998777			1.6	0.994262	0.995473	0.994641	0.995792	0.991683	0.998105	0.991365	0.991427	1.00118	1.00053			1.6	1.0014	1.00422	0.998434	0.999249	0.995372	0.992416
	0.9	0.986208	0.987979	0.995454	1.00262	1.00032	1.00007	0.992152	1.00531	0.99673			0.9	1.00181	0.999111	1.00297	1.00352	1.00546	1.00294	0.993767	0.999581	0.997058	0.996517	0.998782	1.00718	0.994403	0.998777			1.8	0.996604	0.997843	0.995994	0.991872	0.995681	1.00504	0.993712	1.00124	0.997566	0.997199			1.8	1.00362	1.00041	0.995987	0.996744	0.996665	0.99617
	1	0.989335	0.98893	0.992612	0.997711	0.999245	0.999048	0.995059	1.00736	0.995753			1	0.997089	0.991561	0.999788	1.00639	1.00745	1.00202	0.996566	0.999581	1.00007	0.998771	1.00196	1.00319	0.993203	0.999796			2	0.998946	0.994288	1.00005	0.995792	0.994348	0.99695	0.994885	0.994699	0.991542	0.996087			2	0.996958	1.00168	0.995987	0.999249	0.997958	0.994919
	1.1	0.986208	0.99369	0.999242	0.999673	0.994934	0.995981	0.997965	1.00223	0.998682			1.1	0.996144	1.00414	0.996607	1.0016	1.00745	1.00202	0.996566	1.00265	1.00107	0.998771	1.00196	1.0022	0.994403	0.999796			2.2	0.996604	1.00021	1.00141	0.999713	0.997014	0.999261	1.00192	0.99579	0.992747	0.992752			2.2	0.998068	1.00549	1.0021	1.0005	1.00184	0.999925
	1.2	0.98725	0.992738	0.993559	0.991825	0.992778	0.999048	0.992152	1.00223	0.98892			1.2	0.997089	0.997433	0.998728	1.00735	1.0005	1.00294	0.997499	1.00163	1.00107	0.997644	1.0009	1.00419	0.993203	0.997758			2.4	1.00129	1.0014	0.998701	1.00102	0.998347	1.00042	1.00192	0.996881	0.998771	0.99831			2.4	1.00473	1.00549	1.00088	1.00175	0.99925	1.00243
	1.3	0.992463	1.00035	0.998295	1.00065	0.999245	0.99189	0.995059	1.00428	0.998682			1.3	0.999924	0.99995	1.00191	1.01502	0.99851	1.00386	0.999365	1.00367	1.00007	1.00328	1.00726	1.00419	0.995604	0.999796			2.6	0.994262	0.997843	0.998701	0.999713	0.998347	0.99695	1.0031	0.997971	1.0048	0.999422			2.6	1.00251	1.00041	0.99721	0.999249	1.00313	0.999925
	1.4	0.990378	0.991786	0.998295	0.995749	1.00032	0.999048	0.99409	1.00531	0.992825			1.4	0.995199	0.997433	0.994487	1.01023	1.0005	1.00294	0.999365	1.00367	1.00409	0.999899	1.0062	1.00519	0.994403	1.00082			2.8	1.00129	1.00021	0.997348	0.999713	0.997014	0.999261	0.994885	0.991427	0.993952	0.99831			2.8	1.00473	1.00168	0.998434	0.995492	1.00054	1.00118
	1.5	0.989335	0.991786	0.999242	0.991825	0.999245	1.00416	1.00959	1.00326	0.99673			1.5	0.999924	0.999111	0.995547	1.01023	1.00248	1.00478	0.998432	1.00367	1.00107	0.997644	1.00514	1.00618	0.995604	1.00082			3	1.00129	1.0014	1.00005	0.997099	0.998347	1.00042	0.996058	0.996881	0.998771	0.996087			3	1.0014	0.997864	0.99721	1.00175	1.00054	1.00118
	1.6	0.990378	0.995593	1.00019	0.992806	1.00248	1.00416	0.997965	1.00531	0.997706			1.6	0.999924	1.00247	0.995547	1.01119	0.99851	1.00478	0.999365	1.00367	0.999066	0.997644	1.0009	1.00419	0.996805	1.00082			3.2	0.997775	1.00021	0.997348	1.00233	1.00101	1.00273	0.996058	1.00124	0.997566	0.997199			3.2	1.00029	1.00676	1.00455	1.00426	1.00184	1.00118
	1.7	0.98725	0.991786	1.00114	0.994768	1.00032	1.00416	0.986339	1.00428	0.990872			1.7	1.00087	1.00331	0.998728	1.00352	1.0005	0.995583	0.997499	1.0006	0.996054	1.00215	1.00514	1.00319	0.994403	0.998777			3.4	0.997775	0.997843	1.00141	0.999713	1.00768	0.998105	0.996058	0.996881	0.997566	0.994975			3.4	1.0014	1.00676	1.00088	1.00301	1.00054	1.00118
	1.8	0.989335	0.98893	1.00208	0.99673	1.0014	1.00109	0.993121	1.01044	0.997706			1.8	0.995199	0.999111	0.997668	1.01214	0.994536	0.990983	0.997499	1.00265	0.999066	0.995389	1.00196	1.0012	0.9896	0.996739			3.6	0.997775	1.00021	1.00276	0.999713	1.00768	0.999261	0.999578	0.997971	0.997566	0.999422			3.6	1.00362	1.00422	1.00455	1.00426	1.00184	0.999925
	1.9	0.994548	0.995593	1.00398	1.00164	0.996012	1.00416	0.992152	1.00223	0.992825			1.9	0.994254	0.99995	0.995547	1.01598	0.995529	0.998344	0.996566	0.998557	0.99505	1.00215	1.00726	1.0022	0.995604	1.00183			3.8	1.00012	1.0014	0.998701	0.999713	1.00368	1.00042	0.998404	0.996881	1.0048	1.00832			3.8	1.00362	1.00168	1.0021	0.995492	1.00054	0.997422
	2	0.99142	0.992738	1.00587	1.00164	0.996012	0.998026	0.993121	0.999148	0.994777			2	0.999924	0.99995	0.999788	1.01214	1.00447	1.00018	1.0003	1.00572	0.999066	0.998771	1.00196	0.999214	0.995604	1.00082			4	1.00363	1.00258	0.998701	1.00102	1.00368	1.00388	1.00192	1.00233	0.998771	0.996087			4	1.0014	1.00295	1.0021	1.00175	1.00701	1.00118
	2.1	0.98725	0.992738	1.00019	0.994768	0.994934	0.997003	0.998934	1.00736	0.995753			2.1	0.998034	0.99995	0.996607	1.00639	1.00149	0.996503	0.9947	0.998557	0.990029	0.997644	1.00408	1.00021	0.996805	1.00082			4.2	0.997775	0.999028	0.998701	1.00363	1.00101	1.00042	1.00427	1.00124	0.999976	1.00387			4.2	1.0014	1.00168	0.999657	0.999249	1.00442	1.00368
	2.2	0.992463	0.991786	1.00208	0.998692	0.992778	1.00212	0.999903	1.00634	0.994777			2.2	0.995199	0.99995	0.996607	1.01406	0.991555	0.992823	0.999365	1.00265	0.997058	0.999899	1.00302	1.00021	0.993203	0.998777			4.4	1.00246	1.00021	1.00005	1.00102	1.00101	1.00042	0.999578	0.99579	0.998771	1.00165			4.4	1.00029	1.00168	1.00088	1.00676	1.00184	1.00243
	2.3	0.99559	1.00035	1.00114	0.999673	1.00032	0.995981	1.00087	1.0012	0.999658			2.3	0.997089	1.00079	0.994487	1.01023	1.00646	1.00202	0.996566	1.0047	0.994046	0.999899	1.0062	0.999214	0.995604	0.999796			4.6	1.00363	1.00258	1.00141	1.00625	1.00634	1.00504	1.01248	1.00997	0.997566	1.00387			4.6	1.0014	1.00168	1.00088	0.999249	0.997958	1.00118
	2.4	0.993505	1.00226	1.00208	1.00065	0.992778	1.00416	1.00087	0.997094	0.990872			2.4	0.996144	1.00498	1.00191	1.0131	0.99851	0.995583	0.997499	1.0047	0.99505	1.00215	1.00302	0.998219	0.998006	1.00285			4.8	1.00129	1.0014	1.00276	1.00494	1.00634	1.00504	1.00427	1.00233	1.00239	1.0072			4.8	1.00029	1.00041	0.999657	0.995492	0.997958	1.00243
	2.5	0.993505	0.998449	0.998295	1.00065	0.994934	0.994958	0.996996	0.999148	0.99673			2.5	0.996144	1.00079	0.996607	1.00735	1.00149	0.997424	0.995633	1.0006	0.992038	0.998771	1.00196	1.00519	0.995604	1.00183			5	1.00246	1.00377	1.00141	1.00233	1.00368	0.999261	1.0031	0.999062	1.00359	1.00609			5	1.0014	0.996593	1.00088	0.997996	1.00054	1.00243
	2.6	0.993505	0.9994	0.998295	1.00164	1.00032	1.00007	0.996996	1.00428	0.99673			2.6	0.995199	0.999111	0.996607	1.00831	1.00248	0.995583	0.999365	1.00367	0.997058	0.993135	0.998782	1.0022	0.992002	0.998777			5.2	0.997775	1.0014	1.00276	1.00102	1.00768	1.00042	1.00662	0.996881	0.998771	1.00943			5.2	1.00251	1.00168	1.00088	0.996744	0.994079	0.992416
	2.7	0.994548	1.00035	1.00208	1.00262	0.998168	1.00212	1.00184	0.999148	0.997706			2.7	0.998034	0.998272	0.998728	1.01119	1.00348	0.995583	1.00216	1.00163	0.996054	1.00103	1.0009	1.0012	0.995604	1.00387			5.4	1.00012	0.999028	1.00005	0.999713	1.00501	1.00504	0.999578	1.00342	1.00118	1.00609			5.4	1.0014	1.00041	1.0021	1.00175	1.00571	1.00368
	2.8	0.988293	0.994641	0.999242	0.999673	1.00032	1.00109	0.996996	0.999148	0.998682			2.8	0.992364	0.999111	0.996607	1.01119	1.00745	0.996503	1.00216	1.00367	0.997058	0.993135	0.995605	1.0022	0.995604	0.999796			5.6	0.997775	0.996658	1.00141	1.00363	1.00368	1.00504	1.0031	1.00015	0.995157	1.00498			5.6	1.0014	1.00295	1.00333	1.00175	1.00184	1.00243
	2.9	0.993505	1.00226	1.00208	0.999673	0.998168	1.00416	0.992152	1.00531	0.995753			2.9	0.994254	0.999111	0.999788	1.00448	1.00248	0.992823	0.996566	0.994465	0.992038	0.999899	0.999841	1.00021	0.990801	0.9947			5.8	1.00012	0.996658	1.00141	0.999713	1.00501	1.00388	1.0031	1.00561	0.996362	0.996087			5.8	0.999178	0.997864	1.00333	1.00175	1.00054	1.00368
	3	0.994548	1.00226	0.997348	0.999673	0.998168	0.997003	0.995059	0.998121	0.994777			3	1.00181	1.00079	0.996607	1.01119	0.997516	0.990983	1.00123	0.999581	0.994046	1.00441	1.00302	1.0012	0.995604	0.996739			6	1.00246	0.999028	1.00411	1.00363	1.00368	1.00042	1.0031	1.00015	1.00239	1.00387			6	1.00029	0.994051	1.00333	1.0005	0.997958	0.999925
	3.1	0.99142	0.998449	1.00208	1.00262	0.999245	0.999048	1.00572	0.999148	0.99673			3.1	0.999924	0.999111	0.999788	1.01023	1.00149	0.990983	1.0003	1.0047	0.999066	0.997644	0.997723	1.00319	1.00161	1.00387			6.2	1.00129	0.999028	1.00141	0.998406	0.995681	1.00157	0.999578	1.0067	1.00239	0.999422			6.2	1.00029	0.999136	0.998434	1.00175	1.00442	1.00243
	3.2	0.99559	1.00226	1.00019	1.0036	1.00032	1.00212	0.995059	1.00326	0.995753			3.2	0.998034	0.996594	0.995547	1.01023	0.999503	0.991903	1.00123	1.0006	0.99505	0.998771	0.998782	1.00419	1.00161	1.00082			6.4	1.00363	1.00377	1.00141	1.00755	1.00235	0.999261	1.00192	1.00561	1.006	1.00609			6.4	0.996958	1.00041	1.00333	1.0005	0.99925	0.99617
	3.3	0.996633	0.9994	1.00303	1.00458	0.99709	1.00212	0.996028	1.00223	0.992825			3.3	1.00087	1.00163	0.994487	1.0131	1.00149	0.991903	1.00123	0.999581	0.998062	0.999899	1.0009	1.0022	0.994403	0.996739			6.6	1.00363	1.0014	1.00682	1.00886	1.00768	0.999261	0.999578	0.999062	1.00239	1.00387			6.6	1.00251	0.995322	1.00455	1.00551	1.00054	1.00118
	3.4	0.996633	1.00226	1.00114	1.00556	0.998168	0.999048	0.999903	0.999148	0.997706			3.4	0.998979	0.995755	0.997668	1.01214	1.00447	0.994663	1.00216	1.0047	1.00007	1.00103	0.999841	1.00319	0.998006	1.00082			6.8	1.00012	0.999028	1.00276	1.00102	1.00101	0.998105	1.00075	1.00233	1.0048	1.00053			6.8	0.998068	0.999136	1.00088	0.999249	0.996665	0.997422
	3.5	0.996633	0.9994	1.00114	1.00262	0.998168	1.00212	0.995059	1.0012	0.991848			3.5	0.998979	1.00331	1.00085	0.99585	1.00646	0.995583	0.999365	0.999581	0.997058	1.00103	0.998782	1.00319	0.996805	1.00183			7	1.00129	0.999028	0.997348	1.00233	0.998347	1.00042	0.998404	0.997971	1.0048	1.00498			7	0.998068	0.996593	1.00578	0.999249	1.00184	1.00243
	3.6	0.996633	0.9994	1.00493	1.00458	0.99709	1.00212	1.01153	1.00326	0.991848			3.6	0.998034	1.00079	1.00085	0.997767	0.999503	0.990983	0.999365	1.00163	0.997058	0.997644	0.998782	1.00319	0.995604	0.998777			7.2	1.0048	1.00377	1.00276	1.00494	1.00101	1.00042	1.0031	1.00888	0.999976	1.00498			7.2	0.994738	0.997864	1.00088	1.00175	1.00313	1.00118
	3.7	0.998718	0.9994	1.00398	1.0036	0.996012	0.998026	0.999903	1.00531	0.998682			3.7	0.999924	0.998272	1.00191	0.996808	1.00248	0.996503	0.999365	1.00163	0.998062	0.998771	0.998782	1.00419	0.995604	1.00082			7.4	1.00012	1.0014	1.00141	1.00755	1.00768	0.999261	1.00544	1.00452	1.0072	1.00276			7.4	0.998068	0.997864	1.0021	1.00676	1.00313	1.00493
	3.8	0.998718	0.998449	0.999242	1.00164	1.0014	1.00314	1.00669	1.00428	0.99673			3.8	0.998034	0.996594	1.00297	0.996808	1.00149	0.995583	1.00216	0.999581	0.998062	1.00328	1.0009	1.00419	0.992002	0.996739			7.6	1.00363	1.00021	1.00411	1.00102	1.00634	1.00157	1.00192	1.00233	1.00359	1.0072			7.6	0.999178	1.00168	0.998434	1.00301	1.00054	1.00493
	3.9	0.996633	0.995593	0.997348	0.998692	1.00248	1.00416	0.996996	1.00531	0.998682			3.9	0.998034	0.996594	1.00615	0.994891	1.00447	0.995583	1.00216	1.0047	1.00007	0.999899	0.998782	1.00319	0.998006	1.00285			7.8	0.997775	0.996658	1.00005	0.999713	0.994348	0.998105	0.998404	1.00452	0.996362	0.999422			7.8	0.996958	0.996593	1.00578	1.0005	1.00054	1.00368
	4	1.00497	0.9994	1.00114	1.00262	0.998168	1.00416	1.00281	1.00017	0.997706			4	0.998034	0.99995	1.00191	0.999684	0.995529	0.994663	0.998432	0.998557	0.996054	1.00103	0.996664	1.00021	0.996805	1.00082			8	1.00246	1.00021	1.00141	1.00363	1.00368	1.00619	1.00544	1.00779	0.997566	0.999422			8	1.00029	1.00168	1.00333	1.00175	1.00313	1.00368
	4.1	1.00185	1.0013	1.00114	1.00458	1.00356	1.00416	1.00184	1.00839	0.99673			4.1	0.998979	0.998272	1.00509	1.00352	1.00149	0.999264	1.0031	1.00163	0.996054	1.00215	0.996664	0.998219	0.998006	1.00082			8.2	1.00597	1.00495	1.00547	1.00625	1.00501	0.99695	0.998404	1.00233	0.999976	1.00498			8.2	0.996958	1.00041	0.999657	1.00175	0.997958	0.999925
	4.2	1.00497	0.998449	1.00019	1.00164	0.999245	1.00212	0.997965	1.00223	0.997706			4.2	0.998034	0.999111	1.00191	1.00256	1.00248	1.00386	1.00216	1.00572	0.997058	0.999899	0.995605	0.997223	0.994403	0.998777			8.4	1.00363	0.996658	1.00411	1.00755	1.00634	1.00042	1.00779	1.01324	1.00359	0.999422			8.4	0.994738	0.996593	1.00333	1.00175	1.00442	1.00243
	4.3	1.00393	1.00226	1.00208	1.00164	1.0014	1.00007	1.00281	0.996067	0.995753			4.3	0.995199	0.994077	1.00297	1.00735	1.0005	1.0011	0.999365	0.998557	0.999066	0.998771	0.997723	0.998219	0.999207	1.00285			8.6	1.00246	1.0014	1.00141	1.00363	0.995681	1.00042	1.0031	1.00452	1.00841	1.00387			8.6	0.995848	0.996593	0.998434	1.0005	1.00184	1.00368
	4.4	1.00602	1.00701	1.00398	0.998692	1.0014	0.999048	0.991183	0.994013	0.993801			4.4	0.997089	1.00079	1.00191	0.996808	1.00149	1.0057	0.998432	1.00163	1.00107	0.999899	0.995605	0.998219	0.995604	1.00082			8.8	1.00012	1.00377	1.00141	1.00102	1.00101	1.00042	0.999578	1.00342	1.006	1.00387			8.8	0.999178	0.995322	0.999657	1.00175	0.997958	0.99617
	4.5	0.99976	1.00511	1.00208	1.0036	1.00032	0.999048	1.00669	0.99504	0.997706			4.5	0.993309	0.994077	1.00615	1.00064	0.997516	1.0011	1.00123	1.00367	1.00208	1.00103	0.999841	0.998219	0.995604	1.00183			9	1.00714	1.00021	1.00276	1.00494	0.99968	1.00273	1.00544	1.00888	1.00961	0.99831			9	1.0014	0.997864	0.99721	1.0005	1.00184	1.00368
	4.6	0.996633	0.997497	0.999242	1.00065	1.0014	1.00621	0.999903	0.996067	0.995753			4.6	0.994254	0.994916	1.00191	0.998725	0.999503	1.0011	1.0003	0.999581	1.00007	0.994262	0.993486	0.996228	0.996805	1.00183			9.2	1.00363	1.00258	1.00141	1.00494	0.995681	1.00042	1.00075	1.00342	1.01202	1.00165			9.2	1.00029	0.996593	1.0021	1.00301	1.00571	1.00743
	4.7	0.99976	1.00511	1.00398	1.00262	1.00032	0.997003	1.00475	0.999148	1.00063			4.7	0.998034	0.995755	1.00297	1.00256	1.0005	0.997424	1.00216	1.0047	1.00107	1.00103	0.999841	0.998219	0.998006	0.999796			9.4	1.00363	1.00495	1.00005	0.995792	0.993016	1.00042	1.00192	1.00342	1.00118	0.997199			9.4	0.996958	0.996593	1.00088	0.999249	1.00184	1.00118
	4.8	0.99559	0.9994	1.00303	0.999673	0.999245	0.999048	1.00475	1.00531	0.997706			4.8	0.994254	0.994916	1.00509	1.00448	0.999503	0.995583	0.998432	0.997534	1.00007	0.999899	0.998782	0.996228	0.998006	0.999796			9.6	1.00363	1.00495	1.00547	0.999713	1.00101	1.00042	1.00075	0.997971	1.00359	1.00276			9.6	1.0014	0.994051	1.0021	1.00301	1.00184	1.00118
	4.9	1.0008	0.998449	1.00114	1.00065	1.0014	1.00212	1.00378	1.00017	1.00063			4.9	0.995199	0.995755	1.00403	0.999684	1.00546	0.999264	0.999365	0.997534	1.00107	0.998771	0.999841	1.00021	1.00521	1.00591			9.8	1.00363	1.00377	1.00547	1.00625	1.00368	0.995795	1.0031	1.00233	1.00118	0.997199			9.8	0.996958	0.995322	1.00088	1.00175	1.00054	0.997422
	5	0.997675	0.998449	0.997348	1.00164	1.0014	1.00109	1.01153	1.00428	0.999658			5	0.998979	0.991561	1.00509	1.0016	1.00248	1.00018	1.0003	0.999581	0.999066	0.998771	0.999841	0.994238	1.00161	1.00082			10	1.00129	0.999028	1.00411	1.00494	1.00235	1.00042	1.00544	1.00124	0.999976	0.996087			10	0.998068	0.990237	1.00333	1.00676	1.00442	1.00869
	5.1	1.00185	1.00511	0.999242	1.00262	0.999245	1.00314	1.00184	0.998121	1.00356			5.1	0.994254	0.994077	1.00509	0.998725	1.00348	0.999264	1.00683	1.00163	1.00208	0.993135	0.993486	0.995233	1.00641	1.00387			10.2	1.00597	1.0014	1.00276	0.999713	0.99968	0.998105	1.00544	1.00561	1.00239	0.999422			10.2	0.999178	0.994051	0.994763	1.00676	1.00313	1.00243
	5.2	1.00289	1.00035	0.998295	0.995749	1.00464	0.995981	1.00184	1.00942	1.00161			5.2	0.995199	0.994916	1.00615	0.997767	1.00248	1.00018	1.00496	0.999581	1.00208	0.996517	0.997723	0.998219	1.00521	1.00183			10.4	1.00714	1.00377	1.00547	1.00494	1.00768	1.00388	1.00544	1.00342	1.00118	0.999422			10.4	0.994738	0.994051	0.998434	1.00676	1.00442	1.00618
	5.3	1.00393	1.00416	1.00019	0.998692	1.00464	1.00314	0.999903	1.00326	1.00063			5.3	1.00087	1.00163	1.00085	0.99585	0.99851	1.00018	1.00403	1.00265	1.00409	0.999899	0.998782	0.994238	1.00041	0.996739			10.6	0.998946	0.995473	1.00411	0.999713	1.00501	1.00273	0.999578	1.00342	1.0048	0.990528			10.6	0.996958	0.990237	1.00088	1.00676	1.00313	0.998673
	5.4	1.00289	1.00416	1.00208	0.998692	1.00248	0.997003	0.996996	1.00428	1.00259			5.4	1.00276	1.00582	1.00403	0.991057	0.996523	1.0011	1.0031	0.999581	1.00107	0.999899	1.00196	0.998219	1.00041	0.99572			10.8	1.00246	0.995473	1.00682	1.00625	0.99968	0.999261	1.0031	1.00452	1.0072	1.00165			10.8	0.999178	0.995322	0.995987	1.00801	1.00571	1.00243
	5.5	1.0008	1.00606	0.999242	0.999673	0.996012	0.993935	0.996028	0.999148	1.00259			5.5	1.00654	1.00331	1.00615	0.994891	0.994536	0.992823	1.00216	0.997534	1.00208	0.998771	0.999841	0.995233	1.00281	0.999796			11	1.00363	1.00377	1.00141	1.00755	1.00634	1.00157	1.0031	1.00233	1.00841	0.99164			11	0.998068	0.991509	0.999657	1.00676	1.00571	1.00118
	5.6	1.00185	1.00321	1.00208	0.998692	1.00356	0.995981	1.00087	1.00017	1.00552			5.6	1.0037	1.00331	1.00191	0.996808	0.992548	0.994663	1.00496	1.00265	1.00509	0.997644	0.999841	0.999214	1.00401	1.00183			11.2	1.00363	1.00021	1.00817	1.00625	1.01168	0.995795	1.00192	0.99579	1.0048	0.994975			11.2	0.995848	0.991509	1.00088	1.00927	1.00442	1.00368
	5.7	0.997675	1.0013	0.999242	0.999673	1.00032	1.00007	1.00281	1.00017	1.00356			5.7	1.0037	1.00331	1.00297	1.00064	0.995529	0.998344	1.00496	0.998557	1.00208	0.998771	0.999841	0.996228	1.00281	1.00082			11.4	1.00246	1.00021	1.00411	1.00233	1.00101	0.999261	1.00192	1.00233	1.0072	0.996087			11.4	1.0014	0.985153	1.00455	1.00301	1.00184	1.00118
	5.8	1.0008	1.00226	1.00019	0.998692	0.999245	0.999048	0.993121	1.00326	0.999658			5.8	0.998034	1.00163	1.00191	0.992974	0.994536	0.996503	1.0003	0.997534	1.00107	0.999899	1.0009	1.0012	1.00281	0.998777			11.6	1.00363	1.0014	1.00276	1.00233	0.99968	0.999261	1.00662	1.00452	1.00118	0.99831			11.6	0.995848	0.995322	0.994763	1.01052	1.00701	1.00368
	5.9	1.0008	1.00416	0.994507	0.993787	0.999245	0.99189	0.999903	1.00223	0.999658			5.9	1.00465	1.00498	1.00191	0.994891	0.989568	0.994663	1.00403	0.997534	1.00007	1.00103	1.0009	1.0022	1.00521	1.00285			11.8	1.00597	1.00021	1.00682	1.00233	1.00501	0.99695	1.00192	0.999062	1.00239	0.997199			11.8	0.998068	0.991509	0.999657	1.00801	1.00313	1.00618
	6	0.99976	1.00226	1.00303	1.00065	0.998168	0.994958	1.00087	1.0012	1.00649			6	0.995199	1.00163	1.00085	0.994891	0.996523	0.995583	1.00496	0.995488	1.00208	0.997644	0.996664	1.00021	1.00401	0.998777			12	1.00597	1.00495	1.00547	1.00625	1.00768	0.993485	1.00544	1.00015	1.01082	1.00053			12	0.996958	0.990237	0.998434	1.00551	1.00701	1.00118
	6.1	0.99559	0.997497	1.00303	1.00164	1.00032	0.998026	1.00572	0.999148	0.999658			6.1	0.999924	1.0075	0.999788	0.991057	0.999503	0.997424	1.00496	0.997534	1.00107	0.999899	0.999841	0.999214	1.00161	0.996739			12.2	1.0048	1.0014	1.00411	1.00233	0.99968	0.998105	1.00427	1.00233	1.00359	0.993863			12.2	0.992517	0.991509	0.998434	1.00426	1.00184	1.00368
	6.2	1.00185	1.00226	1.00398	1.00164	1.00248	1.00212	1.00087	1.0012	1.00063			6.2	0.995199	1.00582	1.00297	0.993933	0.996523	0.990063	1.0003	0.991396	1.00007	0.998771	0.996664	0.998219	1.00401	1.00082			12.4	1.0048	1.00377	1.00276	1.00755	1.00368	0.992329	0.998404	1.00342	1.00118	0.996087			12.4	0.991407	0.987695	0.994763	1.00426	0.99925	1.00243
	6.3	1.00185	1.00035	1.00493	0.998692	0.999245	1.00212	0.996028	0.999148	0.999658			6.3	1.00181	1.00666	1.00191	0.996808	0.997516	0.996503	1.00123	0.997534	1.00107	1.00215	1.00196	0.996228	1.00521	0.999796			12.6	1.00597	1.00021	1.00005	0.997099	0.99968	0.995795	1.00427	1.00997	1.0072	0.994975			12.6	0.996958	0.985153	0.99721	1.00175	1.00054	1.00869
	6.4	1.00393	1.00226	0.999242	0.997711	0.998168	1.00007	1.00475	0.999148	1.00161			6.4	0.999924	1.00582	1.00403	0.993933	0.999503	1.00018	1.0003	0.995488	1.00107	0.999899	0.997723	1.0012	1.00641	1.00183			12.8	1.0048	1.00377	1.00411	1.00363	1.00101	0.99695	1.0031	1.01106	1.006	1.00387			12.8	0.991407	0.986424	0.991092	1.00301	1.00571	1.00493
	6.5	1.00602	1.00511	1.00398	1.00262	0.999245	1.00109	0.996028	1.00017	1.00259			6.5	1.00276	1.00582	0.999788	0.999684	0.997516	1.00847	1.0003	0.991396	1.00007	1.00328	1.0009	1.0012	1.00521	0.999796			13	1.0048	1.0014	0.997348	1.00102	1.00235	0.993485	0.998404	1.00561	1.00359	0.99164			13	0.994738	0.99278	0.99721	1.00927	1.00313	1.00994
	6.6	1.00602	1.00416	1.00303	1.00065	0.999245	1.00314	1.00572	0.998121	1.00747			6.6	1.00181	1.00666	0.996607	0.996808	1.0005	1.0057	1.00216	0.992419	1.00208	0.999899	0.997723	1.00021	1.00281	0.996739			13.2	1.00831	1.00495	1.00411	1.00363	1.00901	1.00042	1.00662	1.00997	1.00359	0.996087			13.2	1.00029	0.985153	0.999657	1.00927	1.00442	1.00368
	6.7	1.00185	1.0013	0.997348	1.00262	0.99709	1.00212	0.995059	0.998121	1.00454			6.7	1.00749	0.99995	1.00085	0.992016	0.996523	1.00847	1.00496	0.997534	1.00509	1.00328	0.999841	1.0012	1.00641	1.00183			13.4	1.00714	1.00377	1.00411	1.00494	1.00634	0.995795	0.999578	1.00124	1.006	0.999422			13.4	0.999178	0.987695	0.992316	1.00927	1.00571	1.00118
	6.8	1.00497	0.9994	0.999242	1.00164	1.0014	1.00109	1.00184	0.998121	1.00844			6.8	1.0056	0.999111	1.00085	0.988182	0.997516	1.0057	1.00123	0.993442	1.00007	1.00215	0.995605	0.999214	1.00401	0.998777			13.6	1.0048	1.00851	1.00411	1.00625	1.01034	0.999261	1.00779	1.00561	0.996362	0.990528			13.6	0.994738	0.994051	0.99721	1.00801	1.00442	0.997422
	6.9	1.00185	0.998449	0.998295	1.00065	0.99709	0.999048	1.00087	0.994013	1.00356			6.9	1.00087	0.998272	0.996607	0.987224	0.993542	1.00202	0.999365	0.990373	1.00208	0.998771	0.995605	0.997223	0.998006	0.99572			13.8	1.00597	1.00732	1.00276	0.999713	1.00101	0.998105	1.00779	1.00779	0.997566	0.992752			13.8	1.00029	0.990237	0.999657	1.00676	1.00313	1.00243
	7	1.00602	0.9994	0.999242	0.998692	1.00571	1.00109	1.00281	1.00223	1.00844			7	1.00465	1.00331	1.00085	0.99585	0.993542	1.00847	1.0031	0.995488	1.01011	0.996517	0.994545	1.00419	1.00521	0.998777			14	1.00129	1.0014	1.00276	1.00363	1.00768	0.998105	1.01014	1.0067	0.997566	0.992752			14	0.998068	0.991509	0.995987	1.00301	1.00959	1.00618
	7.1	1.00497	1.00321	1.00303	0.998692	1.00248	1.00109	1.00475	0.99504	1.00747			7.1	0.998979	1.00331	1.00191	0.992974	1.00447	1.0057	1.0003	0.993442	1.00107	0.999899	0.996664	0.999214	1.00281	0.997758			14.2	1.00597	1.00495	1.00276	1.00363	1.00501	0.99695	1.00662	1.00997	0.998771	0.997199			14.2	0.998068	0.994051	0.995987	1.00551	1.00184	1.00618
	7.2	1.00393	0.998449	1.00019	0.997711	1.00032	1.00416	0.996028	0.996067	1.00747			7.2	1.00087	1.00079	1.00191	0.992016	0.999503	1.00939	1.0003	0.991396	1.00308	1.00103	0.997723	0.998219	1.00641	1.00183			14.4	1.00597	1.00495	1.00141	0.999713	1.00368	1.00157	1.01014	1.00888	1.00118	1.00165			14.4	1.00029	0.994051	0.994763	1.00551	1.00701	1.00493
	7.3	1.00497	1.00511	1.00114	1.00065	0.999245	1.00007	1.00184	0.994013	1.00552			7.3	1.0037	1.00498	1.00085	0.993933	0.99851	1.00755	1.00216	0.995488	1.00509	0.996517	0.993486	0.997223	1.00761	1.00183			14.6	1.00246	1.00377	1.00141	0.999713	1.00634	0.99464	1.00544	1.00342	0.999976	0.994975			14.6	0.998068	0.995322	0.99721	1.00426	1.00959	1.00118
	7.4	1.0081	1.00606	1.00398	0.998692	0.998168	0.998026	0.997965	0.994013	1.00356			7.4	1.00087	1.00247	1.00191	0.99585	1.0005	1.00755	1.00123	0.994465	1.00107	1.00328	1.0009	0.996228	1.00401	0.998777			14.8	1.00012	1.0014	0.993288	0.997099	0.998347	0.998105	1.01131	1.00561	0.998771	0.997199			14.8	0.996958	0.994051	0.992316	1.00551	1.00054	1.00118
	7.5	1.00914	1.00892	1.00208	0.99673	0.998168	1.00314	1.00572	0.998121	1.00161			7.5	1.00654	1.00414	1.00297	0.99585	1.00348	1.00662	1.00123	0.992419	1.0071	0.999899	0.998782	0.997223	1.00641	1.00082			15	1.00714	1.00377	1.00005	1.00102	0.99968	0.99695	1.00662	1.0067	0.991542	0.992752			15	0.998068	0.994051	0.991092	1.00426	1.00313	0.999925
	7.6	1.00602	1.00606	1.00019	0.994768	1.00032	1.00007	1.00475	0.998121	1.00649			7.6	0.998979	1.00498	0.994487	0.992016	1.00546	1.0057	1.00123	1.0006	1.00609	1.00215	1.0009	0.996228	1.00281	0.999796			15.2	1.0048	1.00377	1.00276	1.00363	1.00101	0.998105	1.00662	1.00452	0.997566	0.997199			15.2	0.995848	0.987695	0.995987	1.00676	1.00442	1.00368
	7.7	1.0081	1.00511	1.00114	0.998692	0.999245	1.00109	1.00281	0.99504	1.00063			7.7	1.0056	1.00582	0.998728	0.992974	1.00248	1.00847	1.0003	0.999581	1.0071	1.00441	1.00302	0.995233	1.00641	0.999796			15.4	1.00714	1.00495	1.00547	1.00233	0.99968	0.992329	1.00427	0.999062	0.998771	0.99831			15.4	0.999178	0.99278	0.99354	1.00927	1.00959	1.00994
	7.8	1.00497	1.00226	0.998295	1.00065	1.0014	1.00109	1.00184	0.992986	1.00063			7.8	1.0037	1.00079	1.00403	0.991057	1.00248	1.00294	0.996566	0.991396	0.999066	1.00328	0.999841	0.996228	1.00401	0.997758			15.6	1.00363	1.00258	1.00682	1.00494	1.00501	0.995795	1.0031	1.00124	0.997566	0.997199			15.6	1.00029	0.990237	0.99721	1.00426	1.0083	1.00493
	7.9	1.00602	1.00416	0.994507	0.995749	0.998168	1.00416	0.998934	0.992986	1.00259			7.9	1.00654	1.00666	0.999788	0.988182	0.997516	1.00018	0.998432	0.997534	1.00208	0.998771	0.998782	0.998219	1.00041	0.998777			15.8	1.00246	1.0014	1.00005	1.00494	1.00101	0.995795	1.0031	1.00561	1.00239	0.994975			15.8	0.995848	0.991509	0.994763	1.00927	1.01218	1.00994
	8	1.00914	1.00416	0.995454	0.997711	1.00248	0.993935	1.00184	1.00017	0.999658			8	0.999924	1.00247	0.995547	0.986265	0.995529	0.998344	0.999365	1.0006	1.00509	1.00103	1.00196	0.995233	1.00161	0.998777			16	1.00363	0.996658	1.00547	1.00363	0.998347	0.99464	1.00427	1.0067	1.00239	0.99164			16	0.995848	0.991509	0.995987	1.00801	1.00184	1.00994
	8.1	1.01331	1.00511	1.00114	0.999673	1.00248	0.998026	0.997965	0.999148	1.00356			8.1	1.00654	1.00414	0.998728	0.989141	0.993542	1.0011	0.997499	0.995488	1.00208	0.998771	1.00302	0.999214	1.00041	0.997758			16.2	1.00714	1.00377	1.00141	1.00625	0.99968	0.99464	1.00544	1.00888	1.00841	0.999422			16.2	0.995848	0.991509	0.99721	1.00801	1.00701	1.00618
	8.2	1.01123	1.00321	0.999242	1.00065	1.00464	1.00007	1.00087	0.999148	1.00552			8.2	0.995199	0.999111	0.993427	0.987224	0.996523	1.00294	0.999365	0.998557	1.00208	1.00441	1.00514	0.996228	1.00401	1.00285			16.4	1.00597	1.00614	0.995994	1.00625	0.99968	0.99464	1.00662	1.00452	1.0072	0.996087			16.4	0.995848	0.990237	0.994763	1.00927	1.00701	1.00869
	8.3	1.01019	1.00321	1.00398	0.995749	1.00679	1.00109	0.999903	0.994013	1.00649			8.3	1.00181	1.00582	0.997668	0.990099	0.994536	1.00386	0.999365	0.996511	0.998062	1.00103	1.0009	0.997223	1.00281	0.999796			16.6	1.00831	1.00495	0.998701	0.998406	0.99968	0.99695	1.00662	1.00452	1.0072	0.993863			16.6	1.00029	0.99278	0.994763	1.00927	1.00442	1.00618
	8.4	1.01227	1.00892	0.998295	1.00065	1.00464	1.00007	0.990214	1.00428	1.00259			8.4	1.00087	0.998272	0.996607	0.994891	0.996523	1.00662	0.997499	0.995488	0.998062	1.00215	1.0009	0.995233	0.999207	0.99572			16.8	1.00597	1.00495	1.00005	1.00233	0.998347	0.992329	1.00427	1.00779	1.00841	0.993863			16.8	0.996958	0.991509	0.99721	1.00676	1.00701	1.00618
	8.5	1.00914	0.9994	0.995454	0.997711	0.999245	0.994958	1.00572	0.99504	1.00356			8.5	1.00749	1.00247	1.00191	1.00256	0.995529	1.00755	1.0003	0.999581	1.00308	1.00215	1.00196	0.997223	1.00281	1.00183			17	1.00363	1.0014	0.997348	0.999713	0.998347	0.99695	1.00427	1.00779	1.00841	0.993863			17	0.998068	0.994051	0.99354	1.00551	1.00313	1.00493
	8.6	1.0081	1.0013	0.994507	1.00262	0.999245	0.995981	1.00959	0.99504	1.00552			8.6	0.995199	1.00163	1.00085	0.991057	1.00248	1.00018	0.999365	0.998557	1.00107	1.00215	0.999841	0.994238	0.998006	0.9947			17.2	1.00714	1.00495	1.00141	1.00233	1.00101	0.99695	1.00779	1.0067	1.0072	0.994975			17.2	0.996958	0.987695	0.99354	1.00801	1.00571	1.00618
	8.7	1.01227	1.00606	0.994507	1.0036	1.0014	1.00212	0.999903	0.989906	1.00552			8.7	1.0056	0.996594	0.997668	0.998725	0.992548	1.00478	1.0031	0.998557	1.00208	1.00215	1.0009	0.996228	0.999207	0.996739			17.4	1.0048	1.00732	1.00276	1.00886	1.00768	1.00042	1.01248	1.00997	1.006	0.992752			17.4	0.998068	0.987695	0.991092	1.00801	1.00571	0.998673
	8.8	1.01644	1.00701	0.994507	0.999673	0.998168	0.998026	0.998934	0.992986	1.00552			8.8	1.0056	1.00163	0.998728	1.00256	1.0005	1.0011	1.0031	1.00367	1.00208	1.00441	0.999841	0.998219	1.00281	0.999796			17.6	1.00831	1.00377	1.00141	1.00625	1.00634	0.993485	1.01131	1.00452	0.999976	0.989417			17.6	0.995848	0.987695	0.99354	1.00551	1.00184	1.00243
	8.9	1.0154	1.00511	0.993559	0.999673	1.00464	0.997003	1.00378	1.00017	1.00356			8.9	0.998034	1.00079	0.999788	1.0016	0.996523	1.0011	1.0003	1.00367	1.00107	1.00328	0.998782	1.00021	1.00521	1.00183			17.8	1.00949	1.00614	1.00411	1.01017	1.00634	0.99464	1.01131	1.00888	1.0048	0.987193			17.8	0.998068	0.99278	0.99354	1.00551	1.00313	1.00243
	9	1.0154	1.00511	0.998295	1.00262	1.00248	1.00518	0.999903	0.996067	1.00259			9	1.01032	1.00247	0.997668	0.996808	0.997516	1.00202	1.0031	1.00163	1.00107	1.00328	1.0009	1.0022	1.00521	1.00082			18	1.00949	1.00614	1.00005	1.00233	0.998347	0.991174	1.00192	1.00561	1.00118	0.987193			18	0.995848	0.988966	0.99721	1.00676	1.00184	1.00368
	9.1	1.01227	1.00606	0.997348	1.00556	1.00356	0.999048	1.00184	1.00223	1.00356			9.1	1.00276	0.998272	0.999788	0.99585	0.997516	0.999264	1.00216	1.00265	1.00007	1.00328	1.0009	1.00021	1.00281	0.99572			18.2	1.00363	1.0014	1.00411	1.01278	1.00768	0.992329	1.00427	1.0067	1.00239	0.992752			18.2	0.995848	0.988966	0.988645	1.00801	1.00184	1.00743
	9.2	1.01331	1.00606	0.994507	0.999673	1.00356	0.997003	1.00087	0.99196	0.995753			9.2	1.0037	0.994916	0.997668	0.994891	0.996523	0.998344	1.00216	0.999581	1.00007	1.00103	0.997723	0.999214	1.00281	0.996739			18.4	1.00949	1.00495	1.00141	1.00886	1.00368	0.999261	1.00662	1.00561	1.006	0.992752			18.4	0.994738	0.991509	0.995987	1.01052	1.00959	1.00618
	9.3	1.01331	1.00797	0.990718	0.995749	0.999245	1.00109	1.00378	0.992986	0.997706			9.3	1.00654	0.99995	1.00085	0.991057	0.996523	0.997424	1.0003	0.998557	1.00007	1.00328	0.999841	0.999214	1.00641	1.00183			18.6	1.00597	1.00614	1.00005	1.00233	1.00368	0.992329	1.00427	1.00015	1.00239	0.99164			18.6	0.993627	0.986424	0.99721	1.00927	1.00959	1.00618
	9.4	1.01019	1.00987	0.995454	0.994768	1.00356	0.994958	1.00572	0.997094	1.00063			9.4	0.998979	0.995755	0.995547	0.992016	0.996523	0.994663	0.999365	0.996511	0.997058	0.998771	1.0009	0.995233	1.00401	0.997758			18.8	1.00949	1.00377	1.00141	1.00755	1.00235	0.993485	1.00779	1.00233	1.01202	0.994975			18.8	0.994738	0.983882	0.99354	1.00426	1.00571	0.997422
	9.5	1.00602	1.00226	0.991665	1.00164	1.00464	0.998026	1.00281	0.994013	1.00063			9.5	1.0037	0.997433	0.997668	0.999684	0.991555	0.996503	0.997499	0.999581	0.997058	1.00666	1.0009	0.999214	1.01002	1.00387			19	1.00714	1.00021	1.00141	1.00233	1.00501	0.995795	1.00779	0.999062	1.006	0.997199			19	0.996958	0.98261	0.991092	1.01177	1.00571	1.00243
	9.6	1.0081	1.00987	0.995454	1.00065	0.998168	1.00416	1.00862	0.99504	0.997706			9.6	1.00654	0.994916	0.994487	0.999684	0.994536	0.997424	0.999365	1.00163	0.999066	1.00215	1.00302	0.994238	1.00281	0.998777			19.2	1.00597	1.0014	1.00005	1.00233	0.99968	0.99464	1.00779	1.00342	1.00359	0.996087			19.2	0.990297	0.986424	0.991092	1.00801	1.0083	1.00243
	9.7	1.01019	1.00987	1.00114	1.0036	1.00464	0.998026	1.00765	0.99504	1.00259			9.7	1.0056	1.00247	0.994487	0.999684	0.99851	0.996503	1.0003	1.00367	1.00007	1.00441	0.998782	0.993242	1.00761	1.00082			19.4	1.00597	1.00377	1.00276	1.00755	1.00235	0.998105	1.00896	1.00561	0.999976	0.988305			19.4	0.995848	0.988966	0.995987	1.00801	1.00701	1.00243
	9.8	1.0081	1.00606	1.00303	1.00458	1.00571	1.00212	1.00378	0.996067	1.00649			9.8	1.00087	1.00498	0.998728	0.990099	0.999503	0.992823	1.0031	1.0047	1.00509	1.00666	0.997723	0.998219	1.00882	1.00082			19.6	1.00949	1.00258	0.997348	1.00494	1.00235	0.99695	1.00662	1.00452	0.997566	0.99164			19.6	0.996958	0.985153	0.994763	1.00426	1.00313	1.00368
	9.9	1.00289	0.9994	1.00208	1.00654	1.0014	1.00007	1.00378	0.986825	1.00259			9.9	1.0037	0.999111	0.996607	0.996808	0.992548	0.995583	0.998432	1.00163	0.998062	1.00215	1.0009	0.991252	1.00401	0.99572			19.8	1.00597	1.0014	1.00005	1.00494	1.00368	0.99464	1.00662	1.00561	1.0072	0.989417			19.8	0.996958	0.988966	0.991092	1.00551	1.00442	1.00994
	10	1.01019	1.00321	1.00493	1.00065	1.00356	1.00212	1.00475	0.992986	1.00161			10	1.0056	1.00163	0.995547	0.996808	1.00149	0.998344	0.9947	0.998557	0.998062	1.00328	0.995605	0.990257	1.00161	0.99572			20	1.00949	1.00495	0.998701	0.999713	1.00235	0.99695	1.00896	1.00997	1.0048	0.994975			20	0.999178	0.985153	0.991092	1.00426	1.00313	1.01244
	10.1	1.01019	1.00797	1.00303	1.00458	1.00464	0.999048	1.00087	0.994013	1.00259			10.1	0.996144	1.00414	0.996607	1.00064	1.00149	0.997424	0.997499	1.00674	1.00208	1.00103	0.995605	0.995233	1.00401	0.998777			20.2	1.00714	1.00732	1.00141	1.00102	1.00634	0.99464	1.00544	1.00888	1.00841	0.990528			20.2	0.994738	0.983882	0.992316	1.00551	1.0083	1.00743
	10.2	1.01019	1.0013	1.00587	1.0036	1.00248	1.00416	1.00281	1.00223	1.00747			10.2	1.0056	1.0075	0.994487	0.992974	1.00149	0.997424	0.995633	1.00265	1.00007	1.00666	0.996664	0.996228	1.00401	1.00082			20.4	1.00831	1.00377	1.00005	1.00363	1.00768	0.992329	1.0031	0.997971	1.00359	0.993863			20.4	0.994738	0.990237	0.989869	1.00801	1.00701	1.00618
	10.3	1.01123	1.00035	1.00398	1.00458	1.00356	1.00007	1.00281	1.0012	1.00356			10.3	0.999924	1.00582	0.997668	0.991057	1.00149	0.996503	0.993767	1.00572	1.00208	1.00553	0.998782	0.994238	0.998006	0.992662			20.6	1.00949	1.00495	1.00547	1.00755	1.01034	0.99464	1.01131	1.00233	1.0072	0.988305			20.6	1.00029	0.985153	0.991092	1.00426	1.00701	1.00743
	10.4	1.01019	1.00416	1.00493	1.00262	1.00248	1.00518	1.00475	1.00017	0.998682			10.4	1.0056	1.00498	0.997668	0.993933	0.993542	1.00018	0.995633	1.00367	1.00107	1.00441	1.00196	0.993242	0.996805	0.9947			20.8	1.01066	1.01088	1.00276	1.00494	1.00501	0.995795	1.00779	1.00452	1.0048	0.989417			20.8	0.995848	0.980068	0.989869	1.01052	1.00701	1.01494
	10.5	1.00706	1.00416	1.00398	1.00458	1.0014	0.998026	1.00475	1.00428	1.00259			10.5	1.01032	0.998272	0.998728	0.998725	0.997516	1.00202	0.997499	0.997534	0.997058	1.00441	1.0009	0.993242	0.998006	0.99572			21	1.01066	1.01088	1.00141	1.00886	1.00634	0.991174	0.999578	1.00015	1.00239	0.987193			21	0.995848	0.987695	0.988645	1.00551	1.00571	1.00869
	10.6	1.00706	1.00321	1.00114	1.00262	1.00032	1.00212	1.01056	0.997094	1.00356			10.6	1.00654	0.999111	0.997668	0.997767	1.0005	1.0011	0.999365	1.00265	1.00107	1.00441	1.0009	0.993242	0.995604	0.992662			21.2	1.00714	1.00377	1.00005	0.998406	0.998347	0.993485	1.0031	1.00015	1.006	0.990528			21.2	0.996958	0.987695	0.99721	1.00426	1.00442	1.00368
	10.7	1.00914	1.00701	1.00208	0.99673	1.0014	0.999048	1.00378	0.997094	1.00259			10.7	1.00749	1.00331	0.996607	0.998725	1.00248	1.00018	0.997499	1.0006	0.998062	1.00779	1.0009	0.997223	0.994403	0.9947			21.4	1.00714	1.00377	1.00141	1.00625	1.00768	0.995795	1.00896	1.0067	1.0072	0.986081			21.4	0.996958	0.991509	0.99354	1.00801	1.0083	1.00368
	10.8	1.0081	1.00511	1.00303	1.0036	1.0014	1.00416	0.999903	1.00428	1.00161			10.8	1.00654	0.997433	1.00085	0.997767	1.0005	0.999264	0.999365	1.00163	1.00208	1.00666	1.00302	0.994238	0.998006	0.997758			21.6	1.00831	1.00495	1.00005	0.997099	1.00368	0.990019	1.00075	0.997971	0.996362	0.981635			21.6	0.992517	0.988966	0.991092	1.00927	1.00701	1.00869
	10.9	1.00497	1.00321	1.00587	1.00752	0.996012	1.00723	1.00184	0.996067	0.998682			10.9	1.00654	1.00079	0.996607	1.0016	1.0005	1.0011	0.998432	1.00367	1.00509	1.00103	1.0009	0.990257	0.994403	0.991643			21.8	1.00714	1.0014	1.00682	1.00755	1.00901	0.991174	1.01014	1.00561	1.0048	0.980523			21.8	0.993627	0.990237	0.991092	1.00676	1.00571	1.00493
	11	1.01227	1.00797	1.00398	1.00458	0.996012	1.00109	0.998934	0.992986	0.994777			11	1.00749	0.995755	0.991306	0.996808	1.00248	0.999264	0.996566	1.00163	1.00208	1.00666	0.997723	0.992247	0.993203	0.992662			22	1.01066	1.00614	1.00141	1.00625	1.00501	0.991174	1.01248	1.00452	1.00239	0.977188			22	0.995848	0.983882	0.995987	1.00551	0.99925	1.00368
	11.1	1.0081	1.00226	1.00587	1.00262	1.00032	0.997003	1.00281	0.996067	0.999658			11.1	1.00465	0.993239	0.997668	0.99585	0.99851	1.00202	0.995633	1.0006	1.00509	1.00553	1.00302	0.993242	0.995604	0.991643			22.2	1.01066	1.00732	1.00005	1.00625	1.00101	0.99464	1.01248	1.00342	1.00118	0.979411			22.2	0.993627	0.985153	0.989869	1.00426	1.00571	1.00743
	11.2	1.0081	1.00416	1.00682	1.00262	0.994934	1.00109	0.995059	0.996067	0.997706			11.2	0.999924	0.9924	0.994487	0.999684	0.996523	1.00202	0.996566	1.00265	1.00007	1.00328	1.00302	0.990257	0.993203	0.989605			22.4	1.00831	0.999028	1.00005	1.00625	1.00501	0.988864	1.00544	0.996881	1.006	0.988305			22.4	0.995848	0.986424	0.991092	1.00676	1.00701	1.00493
	11.3	1.0081	1.0013	1.00966	1.0085	0.99709	1.00314	1.00281	0.997094	1.00552			11.3	1.0056	0.995755	0.998728	0.998725	0.999503	0.998344	0.998432	1.00367	1.00007	1.00553	1.00408	0.990257	0.994403	0.993681			22.6	1.0048	1.00377	1.00141	1.00363	1.00768	0.990019	1.00662	1.00233	0.999976	0.981635			22.6	0.996958	0.988966	0.987422	1.00551	1.00442	1.00243
	11.4	1.00914	1.00416	1.00114	0.998692	0.998168	1.00109	1.00475	0.99504	0.999658			11.4	1.00087	0.999111	0.993427	0.997767	0.997516	0.997424	0.999365	1.00367	1.0071	1.00553	1.00514	0.991252	0.992002	0.989605			22.8	1.00949	1.00495	1.00005	1.00233	1.00501	0.99464	1.01248	1.00779	0.999976	0.9783			22.8	0.998068	0.991509	0.988645	1.00551	1.00054	1.00118
	11.5	1.00914	1.0013	1.00398	1.00262	0.993856	1.00621	1.00572	0.992986	0.998682			11.5	1.0037	0.997433	0.997668	0.996808	0.990561	0.993743	0.995633	0.999581	0.99505	1.00553	1.0062	0.992247	0.994403	0.990624			23	1.01183	1.00377	1.00141	1.00102	1.00368	0.987709	1.00075	0.997971	0.995157	0.979411			23	0.993627	0.988966	0.989869	1.00676	1.00571	1.00493
	11.6	1.0081	1.00701	1.00682	1.0085	0.998168	1.00109	1.00572	0.99504	0.997706			11.6	1.00087	0.997433	0.997668	0.998725	0.995529	0.997424	0.995633	0.998557	0.996054	1.00666	1.00514	0.989261	0.993203	0.990624			23.2	1.00831	1.00258	1.00005	1.00494	1.00368	0.992329	1.00427	1.00342	0.996362	0.973853			23.2	0.993627	0.99278	0.991092	1.00676	1.00054	1.00493
	11.7	1.00914	1.00321	1.00303	1.00556	0.993856	1.00007	1.00184	0.990933	0.995753			11.7	0.998979	0.997433	0.998728	0.999684	0.999503	1.00202	0.996566	1.0047	1.00308	1.00666	1.00726	0.992247	0.996805	0.991643			23.4	1.00597	0.997843	0.995994	0.999713	0.99968	0.988864	1.01483	1.00342	0.997566	0.979411			23.4	0.994738	0.994051	0.99354	1.00426	1.00571	1.00243
	11.8	1.00914	1.0013	1.00682	1.00654	0.994934	0.998026	1.00959	0.998121	0.997706			11.8	0.998034	1.00163	0.999788	0.997767	0.99851	0.998344	0.997499	0.998557	1.00107	1.01004	1.0009	0.988266	0.993203	0.989605			23.6	1.01066	1.00732	1.00141	1.00494	1.00501	0.993485	1.01131	1.00233	1.02046	0.999422			23.6	0.991407	0.991509	0.992316	1.00426	1.00054	1.00618
	11.9	1.01436	1.01273	1.00587	1.00065	0.999245	1.00416	1.00281	1.00017	1.00063			11.9	1.00465	1.00079	0.997668	0.996808	0.995529	0.997424	0.995633	0.995488	0.997058	1.00666	1.00514	0.991252	0.999207	0.993681			23.8	1.01066	1.0014	0.997348	0.999713	1.00101	0.988864	1.0031	1.00015	0.993952	0.987193			23.8	0.995848	0.991509	0.987422	1.00551	0.996665	0.997422
	12	1.00914	1.00701	1.00398	0.998692	1.00248	1.00007	1.00669	1.00428	0.999658			12	1.00276	0.996594	0.998728	0.997767	0.999503	1.00018	0.998432	0.996511	1.00208	1.00666	1.00408	0.988266	0.9896	0.986547			24	1.01066	1.00495	0.997348	1.00233	1.00501	0.990019	1.01366	1.00124	0.997566	0.98497			24	0.992517	0.985153	0.982527	1.00551	1.00571	1.00869
	12.1	1.01019	1.00797	1.01156	1.00065	0.998168	1.00621	1.00959	0.996067	0.998682			12.1	1.00276	0.999111	1.00085	0.999684	1.00149	0.997424	0.997499	1.0006	1.00208	1.00779	1.00302	0.993242	0.993203	0.989605			24.2	1.01066	1.00495	1.00005	0.999713	1.00101	0.99464	1.01248	1.00779	1.00118	0.979411			24.2	0.993627	0.988966	0.986198	1.00551	1.00054	1.00743
	12.2	1.00914	1.00797	1.00398	0.997711	0.998168	1.00109	1.00184	0.996067	0.99673			12.2	0.998979	0.99995	0.994487	0.996808	1.00149	0.999264	0.996566	0.993442	0.997058	1.00779	1.00408	0.990257	0.993203	0.987566			24.4	1.00597	1.0014	1.00141	1.00233	1.00101	0.990019	1.00075	1.0067	0.997566	0.977188			24.4	0.998068	0.990237	0.987422	1.00676	1.00571	1.00618
	12.3	1.00602	1.00321	1.00303	1.00065	0.998168	1.00007	0.99409	0.990933	0.99673			12.3	0.996144	0.999111	0.993427	0.992016	0.999503	0.995583	0.998432	1.00163	1.00208	1.00441	1.00514	0.988266	0.994403	0.989605			24.6	1.01066	1.00258	1.00547	1.00494	1.00768	0.988864	1.00075	1.00452	1.00118	0.977188			24.6	0.994738	0.987695	0.988645	1.00426	1.00313	1.00493
	12.4	1.00497	1.00701	1.00871	1.00458	1.00032	1.00109	1.00572	0.99504	0.997706			12.4	1.00181	0.996594	0.996607	0.996808	0.995529	0.995583	0.997499	0.999581	0.998062	1.00779	0.999841	0.989261	0.9896	0.986547			24.8	1.00831	1.0014	1.00682	1.00625	1.00235	0.987709	1.0031	1.00561	0.996362	0.98497			24.8	0.992517	0.988966	0.984975	1.00801	1.00184	1.00368
	12.5	1.01019	1.01177	1.00493	1.00752	0.99709	1.00825	1.00087	0.992986	0.995753			12.5	1.00276	0.998272	0.996607	0.992016	0.994536	0.995583	0.998432	0.999581	1.00208	1.00328	1.00302	0.993242	0.993203	0.990624			25	1.01183	0.999028	1.00547	1.00363	1.00901	0.990019	1.00075	1.00233	0.997566	0.982746			25	0.993627	0.991509	0.988645	1.00551	0.997958	1.00368
	12.6	1.01019	1.00511	1.00682	1.00752	0.999245	1.00007	0.998934	0.989906	0.993801			12.6	1.00465	0.997433	0.995547	0.993933	0.995529	0.995583	0.996566	1.0006	0.999066	1.00328	1.00196	0.990257	0.995604	0.990624			25.2	1.00949	1.0014	1.00411	1.00755	1.00101	0.993485	1.00427	1.01106	0.995157	0.979411			25.2	0.992517	0.987695	0.984975	1.00551	0.99925	0.99617
	12.7	1.00706	1.00892	1.00682	1.0036	0.999245	0.999048	0.999903	0.99504	0.995753			12.7	1.00181	0.999111	0.996607	0.99585	0.997516	0.996503	0.998432	1.00265	0.999066	0.999899	0.998782	0.991252	0.996805	0.992662			25.4	1.00949	1.00258	1.00141	1.00363	1.00768	0.992329	1.0031	1.00561	0.996362	0.9783			25.4	0.999178	0.994051	0.987422	1.00676	1.00054	1.00618
	12.8	1.0081	1.00416	1.00682	1.0036	1.00248	0.99189	1.00475	0.996067	0.997706			12.8	0.991418	1.00079	0.991306	0.998725	0.997516	0.999264	1.00123	0.999581	1.00308	1.00215	1.00196	0.987271	0.998006	0.991643			25.6	1.00831	1.00377	1.00411	1.00363	1.00501	0.992329	1.00896	1.00561	0.995157	0.9783			25.6	0.992517	0.988966	0.984975	1.00551	0.99925	1.00118
	12.9	1.00602	1.00511	1.00682	1.00458	1.00248	1.00416	1.00184	0.997094	0.99673			12.9	0.998034	0.994916	0.993427	0.996808	0.997516	0.997424	0.999365	0.998557	1.00107	0.997644	0.999841	0.986276	0.996805	0.991643			25.8	1.00949	1.0014	1.00276	1.00233	1.00368	0.992329	1.00544	1.00452	1.00118	0.988305			25.8	0.999178	0.990237	0.989869	1.00801	1.00313	1.00368
	13	1.00914	1.00987	1.00682	1.00164	1.00464	1.00109	1.00959	0.997094	0.998682			13	0.999924	1.00247	0.992366	0.993933	0.996523	0.998344	0.995633	0.996511	0.996054	1.00103	0.997723	0.98329	0.993203	0.989605			26	1.00831	1.0014	1.00005	1.00755	1.00768	0.992329	0.999578	1.00452	0.998771	0.976076			26	0.989187	0.990237	0.987422	1.00676	1.00054	1.00368
	13.1	1.00914	1.00892	1.00966	1.00556	0.999245	1.00416	1.00087	0.997094	0.994777			13.1	0.998034	1.00331	0.993427	0.993933	0.997516	0.996503	1.0003	0.999581	1.00509	0.997644	0.998782	0.986276	0.998006	0.992662			26.2	1.00949	1.00614	1.00005	1.00625	1.00768	0.990019	0.997231	1.0067	0.999976	0.983858			26.2	0.991407	0.990237	0.992316	1.00676	1.00184	1.00618
	13.2	1.00914	1.00511	1.00682	1.00556	1.00356	1.00007	1.0125	0.997094	0.999658			13.2	0.998034	0.998272	0.991306	0.99585	0.995529	0.995583	1.0003	0.996511	1.00308	1.00215	0.997723	0.988266	0.995604	0.988585			26.4	1.00831	1.00377	1.00141	1.00233	1.00634	0.990019	1.00779	1.0067	0.998771	0.981635			26.4	0.992517	0.987695	0.986198	1.00801	1.00571	1.00493
	13.3	1.0081	1.00606	1.00493	1.0036	1.00571	1.00109	1.01056	0.997094	0.99673			13.3	0.998979	0.995755	0.992366	0.997767	0.996523	1.0011	0.998432	1.00163	1.00107	1.00103	1.00196	0.986276	0.993203	0.989605			26.6	1.00831	0.999028	1.00276	1.00363	1.01034	0.987709	1.00192	1.00015	0.999976	0.982746			26.6	0.990297	0.985153	0.984975	1.00676	1.00054	1.00618
	13.4	1.01019	1.00987	1.00587	1.00948	0.996012	1.00621	0.999903	0.994013	0.997706			13.4	0.997089	0.994077	0.993427	0.993933	1.0005	1.0011	0.997499	0.997534	1.00107	0.996517	0.995605	0.984285	0.995604	0.990624			26.8	1.013	1.00377	1.00276	1.00233	1.00634	0.990019	1.00662	1.00233	0.990338	0.981635			26.8	0.986966	0.988966	0.987422	1.00676	1.00054	1.00618
	13.5	1.0081	1.00511	0.998295	1.00752	1.00248	0.995981	1.00087	0.99504	1.00259			13.5	0.994254	0.995755	0.993427	0.988182	0.99851	0.996503	1.00123	0.999581	1.00509	1.00553	1.00408	0.9813	0.993203	0.989605			27	1.01183	1.00614	1.00276	1.00233	1.00501	0.983088	1.0031	0.99579	0.996362	0.981635			27	0.994738	0.985153	0.986198	1.01052	1.00442	1.00994
	13.6	1.00914	1.00511	1.00019	1.01243	1.0014	1.00212	0.997965	0.99504	0.997706			13.6	0.987638	0.991561	0.989186	0.994891	0.992548	1.00294	0.999365	0.995488	1.00409	0.996517	0.993486	0.987271	0.998006	0.993681			27.2	1.01183	1.00377	1.00005	1.00494	1.00235	0.985398	1.0031	1.00124	0.996362	0.982746			27.2	0.995848	0.983882	0.986198	1.00301	1.00442	1.00118
	13.7	1.01123	1.00416	0.988824	1.00164	0.993856	1.00416	0.997965	0.983745	0.99673			13.7	0.987638	1.00079	0.991306	0.993933	0.999503	1.00018	1.00216	0.999581	1.00107	1.00103	0.997723	0.984285	0.990801	0.991643			27.4	1.00831	1.00021	1.00411	1.00494	1.01034	0.990019	1.00075	1.00233	0.999976	0.979411			27.4	0.993627	0.985153	0.988645	1.00927	1.00571	1.00869
	13.8	1.01019	1.00606	0.993559	1.00262	1.00032	1.00212	1.00281	0.997094	1.00063			13.8	0.989528	0.995755	0.988126	0.993933	0.995529	0.996503	0.996566	0.995488	1.00208	1.00215	0.998782	0.986276	0.9896	0.986547			27.6	1.01066	1.00258	1.00005	1.00363	1.00901	0.992329	1.00779	1.00779	0.997566	0.976076			27.6	0.990297	0.986424	0.989869	1.00801	1.00442	1.00743
	13.9	1.01019	1.00226	0.996401	1.00458	1.0014	0.998026	0.996996	0.99504	1.00063			13.9	0.994254	0.993239	0.989186	0.989141	0.993542	0.995583	0.995633	0.993442	0.997058	1.00328	0.997723	0.987271	0.993203	0.991643			27.8	1.01066	1.00969	1.00411	1.00886	1.00768	0.993485	1.00075	1.00452	0.999976	0.979411			27.8	0.990297	0.985153	0.988645	1.00676	1.00701	1.00869
	14	1.01019	1.0013	0.997348	0.998692	0.99709	1.00212	1.00281	0.994013	0.999658			14	0.991418	0.994916	0.987065	0.992974	0.990561	0.995583	0.992834	0.989349	0.996054	1.00103	0.995605	0.984285	0.992002	0.991643			28	1.013	1.01325	1.00005	1.00102	1.00501	0.992329	1.00662	1.0067	0.997566	0.990528			28	0.990297	0.983882	0.983751	1.00551	1.00442	1.00743
	14.1	1.01019	1.00226	0.998295	1.00262	1.00679	1.00314	1.00378	0.99196	1.00259			14.1	0.991418	0.998272	0.991306	0.988182	0.990561	0.994663	0.993767	0.992419	0.999066	1.00328	0.998782	0.984285	0.994403	0.992662			28.2	1.00949	0.999028	1.00276	1.00494	1.00235	0.993485	1.00427	1.00342	0.993952	0.981635			28.2	0.990297	0.987695	0.989869	1.01052	1.00313	1.00869
	14.2	1.00602	1.00892	0.993559	1.00262	0.998168	1.00314	1.00572	0.990933	1.00063			14.2	0.984803	0.994916	0.992366	0.986265	0.987581	0.996503	0.992834	0.992419	0.997058	1.00553	0.996664	0.984285	0.990801	0.990624			28.4	1.01066	1.0014	1.00005	1.00625	1.00634	0.991174	1.00075	1.00779	0.997566	0.982746			28.4	0.990297	0.988966	0.989869	1.00801	1.00442	1.00618
	14.3	1.01227	1.00797	0.997348	1.00458	0.992778	0.998026	1.00184	0.982718	0.997706			14.3	0.991418	0.99995	0.993427	0.992974	0.987581	0.997424	0.992834	0.992419	0.997058	1.00666	0.998782	0.980304	0.990801	0.986547			28.6	1.00949	1.00377	1.00817	1.00494	1.01034	0.991174	1.0031	1.00779	0.995157	0.980523			28.6	0.986966	0.985153	0.991092	1.00927	1.0083	1.00869
	14.4	1.00602	0.996545	0.998295	1.00752	1.00032	0.994958	1.00765	0.989906	1.00356			14.4	0.989528	0.99995	0.984945	0.992974	0.992548	0.994663	0.995633	0.998557	1.00007	1.00103	0.996664	0.984285	0.990801	0.990624			28.8	1.01183	1.00614	1.00682	1.00625	1.00634	0.990019	1.00075	1.00452	0.991542	0.974964			28.8	0.993627	0.987695	0.989869	1.00801	1.00054	1.00618
	14.5	1.00706	1.00226	0.997348	1.00752	1.0014	1.00109	0.998934	0.987852	1.00356			14.5	0.988583	0.993239	0.990246	0.992016	0.988574	0.995583	0.995633	0.997534	0.997058	1.00328	0.999841	0.98329	0.995604	0.991643			29	1.01534	1.00851	1.00276	1.00494	1.00634	0.990019	0.986672	0.988155	0.996362	0.977188			29	0.989187	0.98261	0.982527	1.00676	0.99925	1.00618
	14.6	1.00706	0.995593	0.995454	1.00262	0.998168	0.998026	1.00087	0.989906	1.00259			14.6	0.991418	0.994916	0.989186	0.996808	0.989568	0.997424	0.991901	0.993442	0.997058	1.00328	1.0009	0.984285	0.992002	0.991643			29.2	1.01183	1.00377	1.00276	1.00494	1.00901	0.987709	1.0031	0.999062	0.999976	0.982746			29.2	0.992517	0.985153	0.986198	1.00426	1.00054	1.00368
	14.7	1.01331	1.00606	0.992612	1.00262	1.00032	1.00007	1.00281	0.989906	1.00161			14.7	0.990473	0.997433	0.989186	0.993933	0.991555	0.997424	0.993767	0.990373	0.993042	1.00328	0.999841	0.986276	0.985997	0.989605			29.4	1.013	1.00851	1.00411	1.00494	1.00368	0.988864	1.00192	1.00233	1.00118	0.986081			29.4	0.990297	0.983882	0.982527	1.00301	0.997958	0.999925
	14.8	1.00706	1.00321	0.991665	1.0036	1.0014	1.00416	1.00378	0.99196	1.00161			14.8	0.989528	0.994077	0.992366	0.989141	0.991555	0.990063	0.9947	0.992419	0.997058	1.00553	0.999841	0.985281	0.987198	0.988585			29.6	1.01534	1.00732	1.00682	1.00233	1.00768	0.988864	1.00075	1.00124	0.995157	0.983858			29.6	0.991407	0.988966	0.987422	1.00676	1.00442	1.00869
	14.9	1.0081	1.00035	0.993559	0.998692	1.00248	1.00212	1.00959	0.989906	0.99673			14.9	0.991418	0.990722	0.991306	1.00256	0.987581	0.994663	0.9947	0.994465	0.997058	1.00215	0.996664	0.98329	0.984796	0.987566			29.8	1.00949	1.00377	1.00953	1.00625	1.01434	0.987709	1.00192	1.00452	0.996362	0.977188			29.8	0.995848	0.983882	0.988645	1.00551	1.00701	1.01244
	15	1.0081	0.9994	0.996401	1.00458	1.00032	1.00314	0.996996	0.99196	1.00161			15	0.991418	0.994916	0.991306	0.992974	0.996523	0.995583	0.9947	0.993442	1.00007	1.00666	1.00302	0.9813	0.983595	0.986547			30	1.01183	1.0014	1.00682	1.00363	1.00235	0.991174	1.00427	1.00342	0.996362	0.986081			30	0.992517	0.980068	0.984975	1.01052	1.00701	1.00493
	15.1	1.00706	1.00035	0.997348	1.00065	1.00032	1.00416	0.999903	0.996067	1.00161			15.1	0.987638	0.994916	0.989186	0.991057	0.991555	0.995583	0.992834	0.993442	0.998062	1.00441	1.0009	0.98329	0.984796	0.988585			30.2	1.01183	1.00377	1.00547	1.00494	1.00634	0.992329	1.00662	1.00233	0.990338	0.986081			30.2	0.992517	0.980068	0.982527	1.00426	1.00313	1.00869
	15.2	1.01123	1.00226	0.998295	1.00556	1.00464	0.999048	1.00087	0.988879	0.999658			15.2	0.989528	0.989883	0.988126	0.992974	0.989568	0.990983	0.995633	0.995488	1.00007	1.00328	0.999841	0.982295	0.985997	0.989605			30.4	1.01534	1.00495	1.00411	0.999713	1.00501	0.992329	1.00544	1.00233	0.990338	0.983858			30.4	0.984746	0.98261	0.982527	1.00426	0.997958	1.00493
	15.3	1.01123	1.00035	0.997348	1.00164	1.0014	1.00314	0.997965	0.992986	0.997706			15.3	0.988583	0.9924	0.989186	1.00064	0.990561	0.991903	0.991901	0.995488	0.997058	1.00441	0.999841	0.9813	0.987198	0.989605			30.6	1.01183	1.00021	1.00141	1.00363	0.998347	0.991174	0.999578	1.00342	0.995157	0.981635			30.6	0.970313	0.986424	0.983751	1.00551	1.00571	1.00493
	15.4	1.01227	1.00701	0.998295	1.00654	0.998168	1.00518	1.00184	0.99196	0.998682			15.4	0.988583	0.997433	0.987065	0.99585	0.993542	0.990983	0.990967	0.992419	0.997058	1.00553	0.999841	0.982295	0.985997	0.989605			30.8	1.01066	1.00969	1.00817	1.00102	1.00368	0.987709	1.00075	1.00015	0.991542	0.981635			30.8	0.962542	0.981339	0.981304	0.997996	0.997958	0.997422
	15.5	1.00706	0.998449	0.997348	1.00654	1.00032	1.00416	1.00378	0.989906	1.00063			15.5	0.989528	0.998272	0.987065	0.992974	0.985594	0.991903	0.987235	0.990373	0.99505	1.00441	0.996664	0.984285	0.9896	0.993681			31	1.01183	1.00258	1.00276	1.00102	1.00101	0.987709	1.00192	1.00124	0.993952	0.983858			31	0.94922	0.969899	0.96295	0.995492	0.996665	0.997422
	15.6	1.01123	0.9994	0.994507	1.00164	1.0014	1.00007	0.999903	0.992986	1.00161			15.6	0.989528	1.00079	0.989186	0.996808	0.990561	0.990063	0.992834	0.993442	0.998062	1.00666	1.0009	0.98329	0.987198	0.990624			31.2	1.01183	1.00377	1.00547	0.999713	1.00634	0.991174	0.997231	1.00124	0.980699	0.977188			31.2	0.938118	0.969899	0.950715	0.989231	0.985031	0.98741
	15.7	1.01227	1.00321	0.991665	1.00458	1.00032	1.00416	1.00669	0.982718	1.00161			15.7	0.989528	0.995755	0.990246	0.993933	0.992548	0.992823	0.992834	0.994465	0.994046	1.00553	0.998782	0.98329	0.984796	0.990624			31.4	1.01534	1.00732	1.00817	1.00625	1.00768	0.993485	1.00544	0.997971	0.995157	0.9783			31.4	0.931456	0.963543	0.94215	0.981718	0.975982	0.984907
	15.8	1.00706	0.995593	0.993559	1.00262	0.99709	1.00212	0.998934	0.992986	1.00063			15.8	0.995199	0.996594	0.991306	0.997767	0.986587	0.991903	0.991901	0.995488	0.997058	0.999899	0.993486	0.9813	0.985997	0.990624			31.6	1.01417	1.00969	1.00547	1.00886	1.00901	0.984243	1.00192	1.00452	0.990338	0.973853			31.6	0.928126	0.954645	0.933585	0.972953	0.966933	0.974896
	15.9	1.01436	0.9994	0.998295	1.0036	0.998168	0.999048	0.996028	0.989906	0.997706			15.9	0.990473	1.00079	0.986005	0.992974	0.992548	0.988222	0.9947	0.994465	1.00107	1.00328	0.994545	0.9813	0.979992	0.984509			31.8	1.01066	1.00495	1.00682	1.00625	1.00768	0.985398	1.00192	1.00233	0.983109	0.973853			31.8	0.918134	0.953374	0.926243	0.974205	0.963055	0.977398
	16	1.01123	1.0013	0.996401	1.00065	0.999245	0.997003	1.00475	0.988879	1.00454			16	0.992364	1.00331	0.987065	0.992016	0.986587	0.990983	0.991901	0.994465	0.997058	1.00553	0.995605	0.984285	0.982394	0.989605			32	1.00714	1.00377	1.00411	1.00363	1.00768	0.981932	0.994885	1.00342	0.996362	0.981635			32	0.921465	0.94956	0.917678	0.966692	0.956591	0.972393
	16.1	1.01227	1.00511	0.998295	0.997711	1.00464	1.00314	0.992152	0.988879	1.00356			16.1	1.00087	0.996594	0.986005	0.992974	0.989568	0.993743	0.989101	0.992419	0.99505	1.00328	0.996664	0.984285	0.983595	0.991643			32.2	1.01534	1.01206	1.00682	1.01017	1.01168	0.987709	0.998404	0.997971	0.991542	0.973853			32.2	0.920354	0.940662	0.91156	0.962935	0.956591	0.96989
	16.2	1.00914	1.00416	0.994507	0.999673	0.996012	1.00723	0.999903	0.988879	1.00259			16.2	0.999924	0.999111	0.989186	0.990099	0.989568	0.990983	0.991901	0.994465	0.997058	1.00553	0.996664	0.9813	0.983595	0.987566			32.4	1.013	1.00851	1.00411	1.00494	1.00768	0.988864	0.998404	0.997971	0.992747	0.979411			32.4	0.917024	0.941933	0.910337	0.962935	0.952713	0.971141
	16.3	1.01019	1.00226	0.994507	0.999673	1.00356	1.00007	0.999903	0.994013	0.999658			16.3	0.988583	1.00163	0.989186	0.991057	0.992548	0.991903	0.992834	0.995488	0.999066	1.00666	0.997723	0.982295	0.984796	0.987566			32.6	1.00714	1.00021	1.00141	1.00886	1.00768	0.986553	0.998404	1.00233	0.986723	0.980523			32.6	0.911473	0.947018	0.912784	0.955422	0.948835	0.971141
	16.4	1.01019	1.00321	0.996401	1.0036	1.00032	1.00723	1.00669	0.99196	1.00356			16.4	0.990473	0.994916	0.989186	0.992016	0.989568	0.990983	0.990034	0.991396	0.997058	1.00553	0.995605	0.978314	0.984796	0.988585			32.8	1.00831	1.00258	1.00411	1.00494	1.00768	0.987709	0.998404	0.99579	0.987928	0.9783			32.8	0.909252	0.943204	0.909113	0.952918	0.944957	0.959878
	16.5	1.01123	1.00226	1.00019	1.00556	0.996012	1.00416	1.00862	0.987852	1.00259			16.5	0.997089	1.00079	0.993427	0.988182	0.987581	0.991903	0.991901	0.991396	0.998062	1.00215	0.992427	0.9813	0.983595	0.989605			33	1.01183	1.00732	1.01088	1.00886	1.00901	0.987709	1.0031	0.996881	0.987928	0.979411			33	0.910363	0.934306	0.905442	0.950413	0.941079	0.957375
	16.6	1.01019	1.00226	1.00208	1.00752	0.99709	0.998026	0.996996	0.988879	1.00063			16.6	0.995199	0.99995	0.991306	0.990099	0.989568	0.990983	0.993767	0.994465	1.00509	0.999899	0.990309	0.984285	0.996805	0.998777			33.2	1.01066	1.00377	1.00953	1.00886	1.00634	0.986553	0.999578	0.997971	0.985518	0.986081			33.2	0.907032	0.935577	0.902995	0.956674	0.941079	0.962381
	16.7	1.00706	0.9994	1.00114	1.00752	0.998168	1.00212	1.00475	0.987852	1.00552			16.7	0.996144	1.00247	0.992366	0.990099	0.989568	0.993743	0.993767	0.995488	1.00308	1.00215	0.995605	0.988266	0.992002	0.998777			33.4	1.01417	1.00614	1.00953	1.00494	1.00501	0.987709	1.00192	0.996881	0.985518	0.980523			33.4	0.909252	0.933035	0.902995	0.951665	0.943665	0.95362
	16.8	1.0081	1.01082	0.993559	1.00458	1.00248	1.00007	1.00184	0.988879	1.00356			16.8	0.994254	0.998272	0.989186	0.993933	0.985594	0.995583	0.991901	0.993442	0.998062	1.00328	0.996664	0.987271	0.9896	0.996739			33.6	1.01885	1.01562	1.01629	1.00886	0.995681	0.990019	1.00427	0.999062	0.991542	0.977188			33.6	0.910363	0.934306	0.899325	0.951665	0.938494	0.957375
	16.9	1.0081	1.00892	0.996401	1.00752	0.999245	1.00416	1.00669	0.997094	1.00747			16.9	0.990473	0.997433	0.988126	0.990099	0.991555	0.990983	0.992834	0.994465	1.00007	1.00215	0.994545	0.988266	0.996805	1.00387			33.8	1.00949	1.00377	1.01223	1.00886	0.991683	0.987709	1.00075	1.00233	0.989133	0.981635			33.8	0.904812	0.936849	0.898101	0.949161	0.938494	0.952369
	17	1.00706	1.00511	0.999242	1.01537	0.994934	1.00212	0.996028	0.989906	0.999658			17	0.994254	1.00247	0.993427	0.986265	0.989568	0.990063	0.990034	0.990373	0.996054	1.00103	0.993486	0.985281	0.984796	0.9947			34	1.013	1.01206	1.01359	1.01147	0.997014	0.987709	1.00075	0.99579	0.995157	0.9783			34	0.908142	0.933035	0.900548	0.946657	0.938494	0.956123
	17.1	1.00497	1.00226	0.997348	1.01243	1.0014	0.995981	1.00281	0.994013	1.00356			17.1	0.996144	0.994916	0.991306	0.990099	0.982613	0.991903	0.991901	0.995488	1.00007	1.00328	0.994545	0.989261	0.993203	1.00183			34.2	1.01066	1.00495	1.01494	1.01147	0.995681	0.984243	1.00192	1.00342	0.984314	0.981635			34.2	0.909252	0.933035	0.898101	0.945404	0.93203	0.948615
	17.2	1.00602	1.0013	0.999242	1.01537	0.99709	1.00518	1.00669	0.985798	0.998682			17.2	1.00087	0.998272	0.989186	0.991057	0.989568	0.992823	0.9947	0.994465	0.998062	0.999899	0.993486	0.989261	0.992002	1.00183			34.4	1.01534	1.01088	1.01359	1.01017	0.994348	0.985398	0.996058	0.99579	0.990338	0.977188			34.4	0.908142	0.933035	0.898101	0.946657	0.93203	0.951118
	17.3	1.00914	1.00797	0.989771	1.01046	0.998168	1.00007	0.997965	0.990933	1.00063			17.3	1.00181	0.995755	0.992366	0.989141	0.989568	0.992823	0.989101	0.987303	0.990029	1.00328	0.998782	0.991252	0.992002	0.999796			34.6	1.01534	1.00614	1.01629	1.01147	0.997014	0.983088	0.994885	1.00015	0.991542	0.981635			34.6	0.907032	0.930493	0.895654	0.944152	0.933323	0.954872
	17.4	1.00185	1.0013	0.994507	1.01537	0.993856	1.00109	0.999903	0.988879	0.998682			17.4	0.998034	0.994077	0.990246	0.990099	0.987581	0.996503	0.992834	0.991396	0.996054	0.998771	0.990309	0.989261	0.990801	0.999796			34.8	1.01768	1.01088	1.01359	1.01147	0.994348	0.986553	0.993712	0.999062	0.987928	0.976076			34.8	0.900371	0.930493	0.898101	0.940396	0.929445	0.95362
	17.5	1.00289	1.00321	0.992612	1.01733	0.99709	0.999048	1.00475	0.992986	0.999658			17.5	1.00087	0.994916	0.990246	0.992016	0.991555	0.994663	0.990967	0.995488	0.998062	0.996517	0.991368	0.991252	0.993203	1.00082			35	1.01534	1.00377	1.01765	1.01017	0.997014	0.986553	0.999578	0.996881	0.986723	0.972741			35	0.907032	0.930493	0.895654	0.946657	0.929445	0.954872
	17.6	1.00289	1.00606	0.989771	1.01341	0.996012	1.00212	1.00378	0.990933	1.00259			17.6	0.994254	0.994916	0.992366	0.992974	0.990561	0.993743	0.993767	0.993442	0.993042	1.00328	0.994545	0.988266	0.993203	0.99572			35.2	1.01183	1.00495	1.01359	1.00886	0.997014	0.984243	1.00427	1.00015	0.985518	0.971629			35.2	0.904812	0.929222	0.891983	0.945404	0.930738	0.95362
	17.7	1.00497	1.00701	0.992612	1.01439	0.994934	1.00416	1.00572	0.986825	0.998682			17.7	0.999924	0.991561	0.994487	0.990099	0.993542	0.993743	0.993767	0.989349	0.996054	1.00328	0.994545	0.991252	0.995604	1.00285			35.4	1.013	1.00614	1.00953	1.01278	0.993016	0.990019	0.998404	0.997971	0.987928	0.970518			35.4	0.905922	0.930493	0.893207	0.9429	0.934616	0.951118
	17.8	1.00914	1.00511	0.990718	1.01046	0.996012	1.00314	1.00087	0.988879	1.00259			17.8	0.998979	0.999111	0.992366	1.00064	0.986587	0.997424	0.9947	0.993442	0.99505	1.00215	0.994545	0.996228	0.995604	0.999796			35.6	1.01651	1.00614	1.01359	1.0167	0.993016	0.987709	0.998404	1.00233	0.989133	0.980523			35.6	0.908142	0.924137	0.89443	0.945404	0.933323	0.952369
	17.9	1.00393	0.9994	0.991665	1.01145	0.994934	1.00109	0.993121	0.987852	0.997706			17.9	0.998034	0.995755	0.992366	0.991057	0.994536	0.992823	0.995633	0.996511	0.996054	1.00328	0.996664	0.993242	0.990801	0.996739			35.8	1.013	1.00851	1.01359	1.01409	0.995681	0.988864	1.00192	1.00124	0.990338	0.981635			35.8	0.902591	0.92795	0.896877	0.940396	0.92686	0.948615
	18	1.0081	1.00226	0.993559	1.01145	0.996012	1.00314	0.998934	0.987852	1.00161			18	1.0037	0.994077	0.993427	0.992016	0.985594	0.998344	0.996566	0.993442	0.996054	1.00328	0.994545	0.995233	0.993203	1.00285			36	1.00363	1.0014	1.01088	1.01278	0.997014	0.984243	0.997231	1.00015	0.980699	0.971629			36	0.904812	0.929222	0.895654	0.9429	0.930738	0.949866
	18.1	1.00497	1.00226	0.994507	1.0085	1.00032	1.00109	1.00862	0.99196	1.00356			18.1	1.0037	0.990722	0.992366	0.993933	0.989568	0.996503	0.996566	0.993442	0.991034	0.999899	0.992427	0.995233	0.992002	1.00082			36.2	1.00949	1.00969	1.00817	1.00755	0.986351	0.987709	1.00192	0.993609	0.981904	0.968294			36.2	0.900371	0.926679	0.89443	0.941648	0.93203	0.949866
	18.2	1.00289	0.998449	0.992612	1.01145	0.998168	1.00621	1.00669	0.99196	0.999658			18.2	1.00087	0.990722	0.989186	0.999684	0.985594	0.997424	0.993767	0.991396	0.996054	1.00328	0.994545	0.996228	0.992002	1.00183			36.4	1.01066	1.00732	1.00682	1.01278	0.991683	0.991174	1.00192	1.00015	0.987928	0.979411			36.4	0.902591	0.929222	0.893207	0.937891	0.924274	0.943609
	18.3	1.00706	1.00606	0.992612	1.01046	0.999245	1.00416	1.00281	0.990933	0.999658			18.3	0.998034	0.993239	0.989186	0.99585	0.995529	0.993743	0.993767	0.989349	0.992038	1.00103	0.995605	0.992247	0.992002	0.999796			36.6	1.00831	1.00258	1.00953	1.00886	0.99035	0.990019	0.999578	0.996881	0.986723	0.974964			36.6	0.899261	0.931764	0.895654	0.937891	0.925567	0.946112
	18.4	1.01019	1.00321	0.988824	1.01046	0.999245	0.997003	0.997965	0.986825	1.00161			18.4	0.992364	0.993239	0.990246	0.994891	0.989568	0.992823	0.993767	0.991396	0.992038	0.999899	0.992427	0.993242	0.992002	1.00082			36.8	1.013	1.00969	1.00682	1.01278	0.998347	0.988864	1.00192	1.00233	0.986723	0.970518			36.8	0.899261	0.92795	0.895654	0.936639	0.92686	0.951118
	18.5	1.01019	1.00416	0.991665	1.01046	0.99709	1.00212	1.00669	0.988879	1.00161			18.5	0.997089	0.989883	0.990246	0.996808	0.989568	0.992823	0.996566	0.991396	0.993042	0.998771	0.990309	0.989261	0.990801	0.996739			37	1.01417	1.01088	1.00411	1.01017	0.99035	0.986553	1.00075	1.00124	0.990338	0.977188			37	0.899261	0.926679	0.89443	0.937891	0.920396	0.948615
	18.6	1.00914	1.00226	0.988824	1.01145	0.999245	1.00109	1.00669	0.987852	1.00161			18.6	0.996144	0.994916	0.988126	0.99585	0.989568	0.995583	0.995633	0.996511	0.998062	0.998771	0.991368	0.990257	0.993203	0.999796			37.2	1.01417	1.00732	1.01223	1.01801	1.00101	0.984243	1.00075	0.999062	0.992747	0.977188			37.2	0.903701	0.922866	0.893207	0.937891	0.928152	0.946112
	18.7	1.00914	1.00226	0.988824	1.0085	0.999245	0.999048	1.00184	0.988879	1.00161			18.7	0.998034	0.988205	0.991306	0.996808	0.988574	0.995583	0.991901	0.985257	0.991034	0.997644	0.990309	0.991252	0.990801	0.998777			37.4	1.01417	1.01088	1.00953	1.01278	0.993016	0.988864	0.997231	0.99579	0.989133	0.976076			37.4	0.902591	0.925408	0.89076	0.936639	0.92686	0.94486
	18.8	1.00497	1.00035	0.990718	1.00654	1.00032	0.998026	1.00281	0.983745	0.997706			18.8	0.996144	0.994916	0.989186	0.993933	0.989568	0.992823	0.995633	0.993442	0.998062	1.00103	0.990309	0.993242	0.994403	1.00183			37.6	1.013	1.00495	1.00817	1.01017	0.993016	0.988864	1.0031	0.993609	0.985518	0.972741			37.6	0.902591	0.924137	0.899325	0.935387	0.922981	0.94486
	18.9	1.00497	1.00416	0.987876	1.01341	0.99709	0.999048	1.00184	0.977583	0.999658			18.9	0.993309	0.991561	0.979644	0.992974	0.9846	0.990983	0.9947	0.994465	1.00007	0.999899	0.993486	0.990257	0.994403	1.00183			37.8	1.01651	1.00851	1.00411	1.01017	0.99035	0.986553	1.00544	0.997971	0.984314	0.972741			37.8	0.904812	0.924137	0.896877	0.941648	0.929445	0.943609
	19	1.00497	0.996545	0.987876	1.01243	0.999245	0.998026	1.00378	0.988879	0.998682			19	0.997089	0.991561	0.989186	0.996808	0.9846	0.995583	0.996566	0.993442	0.996054	1.00215	0.994545	0.989261	0.988399	0.99572			38	1.01651	1.00732	1.00682	1.01147	0.989017	0.990019	0.997231	0.991427	0.992747	0.971629			38	0.903701	0.926679	0.895654	0.940396	0.930738	0.946112
	19.1	1.00602	1.00511	0.988824	1.01145	0.996012	1.00007	0.999903	0.981691	0.999658			19.1	0.998034	0.993239	0.986005	0.996808	0.988574	0.997424	0.9947	0.992419	0.998062	0.999899	0.993486	0.992247	0.993203	1.00082			38.2	1.01534	1.01206	1.00953	1.01539	0.995681	0.988864	0.999578	0.991427	0.986723	0.967182			38.2	0.903701	0.924137	0.895654	0.936639	0.925567	0.946112
	19.2	0.99976	1.00416	0.987876	1.00752	0.99709	1.00212	1.00959	0.982718	1.00259			19.2	0.995199	0.988205	0.986005	0.998725	0.987581	0.993743	0.993767	0.991396	0.994046	0.997644	0.993486	0.992247	0.993203	1.00082			38.4	1.01651	1.00732	1.00682	1.01017	0.995681	0.984243	1.00192	0.996881	0.993952	0.977188			38.4	0.904812	0.921595	0.893207	0.939144	0.922981	0.947363
	19.3	1.00185	1.00416	0.993559	1.01341	0.994934	1.00314	1.00959	0.97861	0.999658			19.3	0.998979	0.990722	0.990246	0.993933	0.986587	0.991903	0.996566	0.992419	0.997058	0.997644	0.994545	0.995233	0.993203	0.998777			38.6	1.013	1.00969	1.00682	1.01278	0.993016	0.980777	1.00427	0.993609	0.992747	0.9783			38.6	0.907032	0.922866	0.89443	0.939144	0.921689	0.943609
	19.4	1.00497	1.00511	0.987876	1.01145	0.990622	1.00314	0.995059	0.988879	0.999658			19.4	0.993309	0.9924	0.984945	0.993933	0.985594	0.995583	0.993767	0.988326	0.993042	0.997644	0.991368	0.992247	0.992002	0.998777			38.8	1.013	1.01206	1.00817	1.01409	0.995681	0.985398	1.0031	0.99579	0.993952	0.971629			38.8	0.903701	0.925408	0.889536	0.937891	0.92686	0.94486
	19.5	1.0081	1.00701	0.989771	1.00752	0.994934	1.00007	1.00572	0.980664	0.997706			19.5	0.994254	0.990722	0.983885	0.992974	0.985594	0.992823	0.997499	0.992419	0.994046	0.997644	0.991368	0.998219	0.995604	1.00082			39	1.01534	1.01088	1.00682	1.00755	0.987684	0.987709	0.997231	0.997971	0.991542	0.973853			39	0.907032	0.925408	0.899325	0.936639	0.92686	0.947363
	19.6	1.00602	1.00701	0.992612	1.00752	0.998168	1.00109	1.00669	0.987852	1.00161			19.6	0.998034	0.986528	0.982824	0.99585	0.986587	0.993743	0.999365	0.995488	0.999066	0.995389	0.990309	0.999214	0.993203	0.998777			39.2	1.01066	1.00732	1.01223	1.01147	0.993016	0.986553	1.00192	1.00015	0.991542	0.971629			39.2	0.901481	0.921595	0.896877	0.937891	0.924274	0.946112
	19.7	1.01019	1.00701	0.991665	1.00654	0.998168	1.00621	1.00475	0.980664	1.00259			19.7	0.995199	0.98485	0.983885	0.996808	0.985594	0.997424	0.999365	0.991396	0.993042	0.998771	0.990309	0.997223	0.993203	0.999796			39.4	1.01651	1.01206	1.00817	1.01409	0.994348	0.990019	1.00192	0.996881	0.992747	0.970518			39.4	0.902591	0.922866	0.898101	0.936639	0.924274	0.949866
	19.8	1.01019	1.00701	0.987876	1.00458	0.996012	0.997003	1.00378	0.984771	1.00259			19.8	0.998979	0.988205	0.984945	0.993933	0.987581	0.995583	1.0003	0.990373	0.996054	0.996517	0.98925	0.998219	0.993203	0.999796			39.6	1.01417	1.00851	1.01359	1.01409	0.99968	0.984243	1.00544	0.997971	0.993952	0.974964			39.6	0.904812	0.920323	0.893207	0.935387	0.92686	0.943609
	19.9	1.0081	1.00606	0.990718	1.0085	0.996012	0.999048	1.00475	0.979637	1.00161			19.9	0.996144	0.987366	0.986005	0.996808	0.988574	0.995583	0.998432	0.993442	1.00007	1.00103	0.992427	0.994238	0.994403	0.999796			39.8	1.01534	1.00851	1.00547	1.01409	0.994348	0.986553	1.00544	0.992518	0.989133	0.970518			39.8	0.899261	0.921595	0.895654	0.935387	0.925567	0.943609
	20	1.01019	1.00606	0.986929	1.00752	0.993856	1.00007	0.996028	0.981691	0.997706			20	0.996144	0.984011	0.986005	1.00064	0.987581	0.999264	0.998432	0.991396	0.996054	0.997644	0.990309	0.992247	0.988399	0.996739			40	1.01417	1.00732	1.00547	1.01801	0.991683	0.984243	0.999578	0.996881	0.990338	0.969406			40	0.904812	0.921595	0.895654	0.936639	0.92686	0.947363
	20.1	1.00602	1.00511	0.986929	1.00556	0.992778	0.998026	0.999903	0.979637	0.998682			20.1	0.994254	0.981494	0.988126	0.997767	0.992548	0.990063	1.0003	0.991396	0.999066	0.998771	0.98819	0.994238	0.990801	0.99572			40.2	1.013	1.00377	1.00953	1.01278	0.991683	0.981932	0.998404	0.994699	0.995157	0.972741
	20.2	1.0081	1.00797	0.988824	1.00752	0.992778	0.997003	1.00087	0.976556	1.00161			20.2	0.992364	0.983172	0.984945	0.998725	0.989568	0.990983	0.996566	0.98628	0.989025	1.00103	0.98925	0.994238	0.990801	0.997758			40.4	1.01651	1.00851	1.00682	1.01539	0.994348	0.987709	1.00075	0.987065	0.989133	0.971629
	20.3	1.01227	1.00797	0.985982	1.00556	0.992778	1.00109	1.00765	0.979637	0.997706			20.3	0.988583	0.986528	0.982824	0.992974	0.985594	0.990063	0.996566	0.984234	0.989025	0.995389	0.985013	0.993242	0.993203	1.00183			40.6	1.01534	1.00732	1.00682	1.00886	0.986351	0.985398	1.0031	0.996881	0.992747	0.973853
	20.4	1.01019	1.01082	0.987876	1.00654	0.99709	0.999048	1.00184	0.982718	1.00356			20.4	0.994254	0.988205	0.989186	0.999684	0.985594	0.997424	0.997499	0.987303	0.99505	0.997644	0.98819	0.993242	0.993203	1.00082			40.8	1.02003	1.01088	1.00953	1.02193	1.00101	0.986553	1.0031	0.992518	0.993952	0.974964
	20.5	1.00706	1.00797	0.985982	1.00262	0.99709	1.00212	1.01153	0.97861	1.00161			20.5	0.998979	0.985689	0.986005	0.996808	0.986587	0.995583	0.996566	0.991396	0.997058	0.996517	0.987131	0.991252	0.992002	0.999796			41	1.01417	1.00851	1.00547	1.00494	0.987684	0.985398	1.00427	1.00124	0.990338	0.967182
	20.6	1.00706	1.00701	0.989771	1.01243	0.990622	1.00212	1.00378	0.979637	0.998682			20.6	0.995199	0.987366	0.982824	0.987224	0.986587	0.988222	0.998432	0.990373	0.996054	1.00441	0.994545	0.993242	0.992002	0.999796			41.2	1.01417	1.01325	1.01088	1.01539	0.993016	0.986553	1.0031	0.997971	0.996362	0.974964
	20.7	1.00914	1.00416	0.985035	1.00164	0.994934	0.995981	1.00281	0.974503	0.998682			20.7	0.996144	0.986528	0.983885	0.992016	0.980626	0.992823	0.995633	0.989349	0.992038	1.00103	0.990309	0.990257	0.992002	0.998777			41.4	1.01417	1.01325	1.00547	1.01409	0.985018	0.988864	1.0031	0.994699	0.991542	0.970518
	20.8	1.00914	1.00701	0.983141	1.0085	0.99709	0.998026	1.00862	0.976556	0.999658			20.8	0.997089	0.989883	0.992366	0.99585	0.986587	0.992823	1.0003	0.993442	1.00007	1.00328	0.994545	0.989261	0.990801	0.996739			41.6	1.01534	1.01088	1.00411	1.01409	0.987684	0.984243	0.999578	0.999062	0.995157	0.972741
	20.9	1.01227	1.00606	0.982194	1.0036	0.996012	1.00109	1.01153	0.984771	1.00454			20.9	0.997089	0.98485	0.987065	0.999684	0.986587	0.996503	0.995633	0.992419	0.999066	1.00103	0.990309	0.991252	0.993203	0.997758			41.8	1.01768	1.01325	1.00411	1.00755	0.995681	0.985398	0.997231	0.994699	0.995157	0.974964
	21	1.00914	1.00226	0.979352	0.998692	0.998168	1.00212	1.01444	0.981691	1.00161			21	0.999924	0.989044	0.988126	0.996808	0.987581	0.990063	0.9947	0.993442	1.00107	0.999899	0.991368	0.993242	0.994403	0.998777			42	1.01534	1.00969	1.00953	1.01147	0.989017	0.986553	1.00427	0.999062	0.995157	0.964959
	21.1	1.01123	1.00321	0.992612	1.00262	0.996012	1.00518	1.00765	0.981691	1.00063			21.1	0.994254	0.989044	0.982824	0.996808	0.983607	0.991903	0.9947	0.994465	0.996054	1.00103	0.993486	0.993242	0.9896	0.993681			42.2	1.01417	1.00614	1.00817	1.01147	0.989017	0.987709	1.00075	0.99579	0.993952	0.966071
	21.2	1.01019	1.0013	0.988824	0.993787	0.996012	1.00212	1.00669	0.973476	1.00161			21.2	0.991418	0.989044	0.986005	0.996808	0.9846	0.995583	0.996566	0.991396	1.00007	1.00103	0.991368	0.993242	0.992002	0.996739			42.4	1.01417	1.01088	1.00547	1.01409	0.99035	0.986553	0.999578	1.00124	0.991542	0.966071
	21.3	1.00602	0.995593	0.992612	1.0036	0.998168	1.00109	1.00862	0.988879	1.00552			21.3	0.995199	0.986528	0.987065	0.993933	0.9846	0.991903	0.992834	0.991396	0.99505	1.00215	0.995605	0.993242	0.993203	0.99572			42.6	1.013	1.00614	1.00547	1.01409	0.993016	0.986553	0.997231	0.993609	0.995157	0.966071
	21.4	1.00497	0.998449	0.994507	1.00164	0.996012	1.00109	1.00959	0.983745	1.00356			21.4	0.990473	0.988205	0.984945	0.998725	0.982613	0.995583	0.993767	0.982188	0.991034	0.999899	0.992427	0.989261	0.9896	0.9947			42.8	1.00597	1.00495	1.00547	1.01931	0.991683	0.987709	0.993712	0.99579	0.995157	0.964959
	21.5	1.00602	0.9994	0.990718	0.999673	0.994934	1.00109	1.00475	0.979637	1.00356			21.5	0.985748	0.98485	0.986005	1.0016	0.983607	0.999264	0.9947	0.988326	0.997058	0.993135	0.987131	0.996228	0.993203	0.99572			43	1.00949	1.00377	1.00682	1.01278	0.989017	0.990019	0.992538	0.992518	0.993952	0.972741
	21.6	1.00393	0.9994	0.994507	1.0085	0.993856	1.00212	0.999903	0.982718	1.00063			21.6	0.991418	0.982333	0.984945	1.00256	0.985594	0.997424	0.990967	0.984234	0.991034	1.00103	0.995605	0.994238	0.995604	0.999796			43.2	1.013	1.00614	1.00276	1.01409	0.987684	0.983088	1.00779	1.00124	0.996362	0.970518
	21.7	1.00393	0.998449	0.994507	1.01046	0.99709	1.00109	1.01831	0.987852	1.00259			21.7	0.995199	0.985689	0.987065	0.99585	0.985594	0.995583	0.992834	0.988326	0.991034	0.998771	0.994545	0.995233	0.994403	0.997758			43.4	1.01066	1.01088	1.00953	1.01931	0.994348	0.987709	0.990192	0.993609	0.989133	0.969406
	21.8	0.99976	0.998449	0.997348	1.0085	1.00032	1.00416	1.00669	0.985798	1.00161			21.8	0.994254	0.978978	0.982824	0.999684	0.981619	0.993743	0.992834	0.990373	0.998062	0.995389	0.993486	0.998219	0.994403	0.99572			43.6	1.01183	1.00495	1.01088	1.01801	0.99968	0.988864	1.00427	1.00124	0.996362	0.969406
	21.9	1.00289	1.00416	0.992612	1.01243	0.994934	1.00518	1.00378	0.982718	1.00356			21.9	0.993309	0.986528	0.986005	0.996808	0.9846	0.996503	0.993767	0.991396	1.00107	0.999899	0.991368	0.991252	0.992002	0.9947			43.8	1.01768	1.00614	1.00276	1.01801	0.994348	0.988864	1.00075	0.997971	0.997566	0.970518
	22	1.00602	1.00701	0.994507	1.01243	0.993856	1.00212	1.00281	0.980664	0.998682			22	0.991418	0.987366	0.987065	0.987224	0.9846	0.988222	0.991901	0.988326	0.994046	0.995389	0.993486	0.993242	0.992002	0.997758			44	1.01768	1.00851	1.00953	1.01801	0.998347	0.99464	0.999578	0.997971	0.995157	0.963847
	22.1	1.00497	1.00606	0.987876	1.01537	0.99709	1.00109	1.00184	0.981691	1.00356			22.1	0.995199	0.988205	0.988126	0.99585	0.9846	0.990983	0.992834	0.990373	0.994046	0.997644	0.992427	0.994238	0.988399	0.9947			44.2	1.01651	1.00377	1.00682	1.01801	0.994348	0.992329	1.00544	1.00342	0.993952	0.963847
	22.2	0.996633	1.00035	0.987876	1.01537	0.993856	1.00416	1.00765	0.977583	0.99673			22.2	0.997089	0.988205	0.989186	0.989141	0.981619	0.986382	0.990967	0.98628	0.99505	0.997644	0.991368	0.997223	0.992002	0.996739			44.4	1.01651	1.00614	1.00411	1.01539	0.993016	0.990019	1.00075	1.00124	0.989133	0.959401
	22.3	0.99976	1.00226	0.993559	1.01341	0.9917	1.00416	1.00475	0.981691	0.998682			22.3	0.996144	0.984011	0.987065	0.992016	0.983607	0.991903	0.990967	0.985257	0.99505	0.997644	0.992427	0.995233	0.992002	0.996739			44.6	1.01534	1.00495	1.00817	1.0167	0.99035	0.990019	1.00427	0.997971	0.993952	0.961624
	22.4	1.00393	1.00892	0.990718	1.01145	0.996012	1.00212	1.00669	0.982718	1.00063			22.4	0.991418	0.988205	0.989186	0.992016	0.987581	0.990983	0.993767	0.991396	1.00007	0.996517	0.993486	0.996228	0.990801	0.9947			44.8	1.01534	1.00377	1.00682	1.01278	0.987684	0.990019	1.00075	0.997971	0.989133	0.961624
	22.5	0.998718	1.00035	0.989771	1.0085	0.996012	1.00723	1.00765	0.982718	0.999658			22.5	0.989528	0.988205	0.988126	0.987224	0.980626	0.987302	0.992834	0.98628	1.00007	0.998771	0.992427	0.993242	0.9896	0.993681			45	1.01417	1.00732	1.00953	1.01409	0.987684	0.987709	0.998404	0.999062	0.992747	0.960512
	22.6	0.99559	1.00701	0.993559	1.01243	0.992778	1.00109	1.00765	0.983745	1.00161			22.6	0.994254	0.984011	0.989186	0.989141	0.981619	0.990063	0.989101	0.98628	0.998062	0.997644	0.994545	0.997223	0.993203	0.996739			45.2	1.01651	1.01325	1.00547	1.01278	0.987684	0.986553	0.999578	1.00015	0.997566	0.959401
	22.7	1.00185	1.00701	0.985035	1.00654	0.992778	1.00518	1.00378	0.988879	1.00356			22.7	0.990473	0.989883	0.987065	0.988182	0.981619	0.985462	0.988168	0.983211	0.99505	0.997644	0.990309	0.998219	0.993203	0.993681			45.4	1.013	1.01088	1.00953	1.01409	0.986351	0.988864	1.00192	0.993609	0.997566	0.958289
	22.8	0.99559	0.9994	0.993559	1.00458	0.994934	1.00416	1.00087	0.980664	1.00259			22.8	0.994254	0.985689	0.983885	0.992016	0.988574	0.989142	0.986302	0.98628	0.996054	0.999899	0.991368	0.999214	0.990801	0.99572			45.6	1.01651	1.00851	1.00141	1.01017	0.993016	0.990019	1.0031	1.00233	0.990338	0.957177
	22.9	0.998718	1.00511	0.994507	1.01439	0.993856	1.00416	0.998934	0.980664	1.00063			22.9	0.999924	0.986528	0.993427	0.986265	0.976652	0.982702	0.986302	0.988326	0.997058	0.993135	0.992427	0.995233	0.9896	0.9947			45.8	1.02003	1.01088	1.00547	1.01931	0.99035	0.986553	1.00427	0.999062	0.991542	0.959401
	23	1.0008	1.00701	0.992612	1.00556	0.993856	0.995981	1.00087	0.977583	1.00063			23	0.995199	0.991561	0.989186	0.992974	0.989568	0.986382	0.985369	0.98628	0.997058	0.996517	0.993486	0.993242	0.9896	0.992662			46	1.01651	1.00732	1.00817	1.0167	0.99035	0.988864	1.0031	0.999062	0.986723	0.957177
	23.1	1.0008	1.0013	0.990718	1.0085	0.990622	0.999048	1.00669	0.97861	0.998682			23.1	0.995199	0.991561	0.987065	0.991057	0.985594	0.989142	0.984436	0.981165	0.990029	0.993135	0.98925	0.995233	0.990801	0.993681			46.2	1.01417	1.01088	1.00411	1.01017	0.983685	0.984243	1.00075	0.999062	0.991542	0.954954
	23.2	0.997675	1.0013	0.993559	1.01243	0.989544	1.00007	0.996996	0.970395	0.993801			23.2	0.988583	0.982333	0.983885	0.996808	0.992548	0.990983	0.982569	0.983211	0.992038	0.992008	0.991368	0.995233	0.993203	0.996739			46.4	1.01417	1.01206	1.00682	1.01147	0.982352	0.987709	0.998404	0.996881	0.993952	0.963847
	23.3	1.00289	1.00606	0.986929	1.00654	0.990622	1.00007	1.00184	0.977583	0.997706			23.3	0.992364	0.986528	0.983885	0.993933	0.987581	0.985462	0.982569	0.983211	0.991034	0.992008	0.992427	0.992247	0.992002	0.993681			46.6	1.01183	1.00732	1.00547	1.01801	0.987684	0.991174	1.00075	0.994699	0.993952	0.960512
	23.4	1.00185	1.00416	0.986929	1.00752	0.988466	0.997003	1.00378	0.976556	0.992825			23.4	0.985748	0.981494	0.975403	0.997767	0.987581	0.990983	0.988168	0.987303	0.997058	0.994262	0.994545	0.995233	0.992002	0.9947			46.8	1.01066	1.00495	1.00682	1.01931	0.995681	0.988864	1.00192	0.997971	0.992747	0.957177
	23.5	0.99976	1.00416	0.987876	1.00752	0.996012	0.998026	1.00281	0.979637	0.998682			23.5	0.981967	0.98485	0.976463	0.984348	0.978639	0.980861	0.985369	0.987303	0.99505	0.992008	0.992427	0.998219	0.994403	0.997758			47	1.01417	1.00969	1.00953	1.01931	0.993016	0.986553	1.0031	0.99579	0.991542	0.958289
	23.6	1.00185	1.00511	0.987876	1.00262	0.996012	1.00314	1.00669	0.980664	0.997706			23.6	0.981967	0.991561	0.976463	0.984348	0.981619	0.981781	0.985369	0.981165	0.992038	0.993135	0.996664	0.996228	0.990801	0.9947			47.2	1.01768	1.01206	1.00547	1.01539	0.99035	0.979622	1.0031	0.999062	0.998771	0.960512
	23.7	0.996633	1.00511	0.988824	1.0036	0.994934	1.00212	1.00378	0.986825	1.00063			23.7	0.980077	0.9924	0.976463	0.984348	0.978639	0.979021	0.984436	0.984234	0.992038	0.986371	0.994545	0.995233	0.988399	0.990624			47.4	1.01534	1.01206	1.00682	1.01017	0.99035	0.988864	0.998404	0.992518	0.990338	0.962736
	23.8	1.00393	1.00892	0.989771	1.00262	0.993856	1.00212	1.0125	0.982718	1.00356			23.8	0.993309	0.993239	0.982824	0.984348	0.981619	0.980861	0.990034	0.98628	0.998062	0.992008	0.997723	0.998219	0.9896	0.993681			47.6	1.013	1.00851	1.00817	1.01539	0.989017	0.991174	0.997231	0.994699	0.990338	0.966071
	23.9	1.0008	1.00416	0.984088	0.998692	0.994934	1.00007	1.00862	0.97861	0.999658			23.9	0.992364	0.994077	0.984945	0.993933	0.986587	0.987302	0.989101	0.987303	0.997058	0.99088	0.990309	0.996228	0.990801	0.9947			47.8	1.01768	1.01443	1.00005	1.00755	0.982352	0.988864	0.999578	0.994699	0.993952	0.963847
	24	0.99976	1.00987	0.990718	1.00262	0.993856	1.00416	1.00087	0.97861	1.00161			24	0.997089	0.989044	0.987065	0.989141	0.981619	0.982702	0.989101	0.982188	0.994046	0.993135	0.994545	0.997223	0.990801	0.992662			48	1.01768	1.01088	1.00547	1.01409	0.991683	0.987709	1.0031	0.994699	0.989133	0.963847
	24.1	0.998718	1.00226	0.989771	1.00164	0.989544	0.999048	0.999903	0.981691	0.994777			24.1	0.992364	0.994077	0.986005	0.992016	0.987581	0.985462	0.990034	0.983211	0.992038	0.992008	0.993486	0.994238	0.9896	0.989605			48.2	1.01651	1.01325	1.00411	1.01278	0.985018	0.983088	1.00427	0.999062	0.989133	0.964959
	24.2	0.99976	1.00701	0.987876	0.998692	0.993856	0.995981	1.00087	0.981691	0.992825			24.2	0.989528	0.989883	0.983885	0.989141	0.980626	0.979021	0.989101	0.991396	0.997058	0.994262	0.997723	0.996228	0.995604	0.993681			48.4	1.013	1.00732	1.00817	1.01539	0.99035	0.981932	1.00544	0.993609	0.990338	0.963847
	24.3	0.997675	1.00226	0.990718	1.00164	0.992778	1.00109	1.01444	0.977583	0.990872			24.3	0.995199	0.988205	0.989186	0.994891	0.985594	0.983622	0.990967	0.987303	0.994046	0.987498	0.995605	0.997223	0.992002	0.992662			48.6	1.01768	1.01206	1.00817	1.01539	0.994348	0.984243	1.0031	0.992518	0.990338	0.963847
	24.4	0.99559	1.00226	0.993559	0.995749	0.992778	0.995981	1.00669	0.980664	0.995753			24.4	0.994254	0.986528	0.991306	0.99585	0.9846	0.984542	0.992834	0.992419	1.00007	0.99088	0.995605	0.999214	0.988399	0.990624			48.8	1.01885	1.01325	1.00682	1.01409	0.993016	0.985398	1.00192	0.996881	0.997566	0.963847
	24.5	0.996633	1.00511	0.992612	0.99673	0.9917	0.994958	0.999903	0.973476	0.992825			24.5	0.991418	0.990722	0.986005	0.994891	0.986587	0.984542	0.990034	0.990373	0.99505	0.99088	0.990309	0.995233	0.990801	0.991643			49	1.0212	1.01088	1.00817	1.0167	0.99035	0.985398	0.997231	0.994699	0.993952	0.960512
	24.6	0.996633	1.00511	0.991665	1.00065	0.992778	0.992913	1.00475	0.977583	0.995753			24.6	0.990473	0.989883	0.989186	0.987224	0.980626	0.982702	0.990034	0.98628	0.994046	0.99088	0.993486	0.997223	0.992002	0.991643			49.2	1.01651	1.01088	1.00547	1.01147	0.989017	0.985398	1.0031	0.990337	0.992747	0.962736
	24.7	0.993505	1.00416	0.992612	1.00654	0.992778	0.999048	1.00184	0.97861	0.993801			24.7	0.996144	0.987366	0.988126	0.994891	0.987581	0.982702	0.990967	0.989349	0.99505	0.989753	0.993486	0.997223	0.992002	0.991643			49.4	1.01183	1.01206	1.00682	1.01278	0.989017	0.990019	1.00662	0.997971	0.989133	0.959401
	24.8	0.994548	1.00226	0.990718	1.00458	0.994934	0.997003	1.01153	0.97553	0.99673			24.8	0.992364	0.991561	0.986005	0.993933	0.988574	0.984542	0.990967	0.987303	0.996054	0.986371	0.993486	0.999214	0.992002	0.988585			49.6	1.01417	1.01088	1.00411	1.01278	0.993016	0.988864	1.00896	0.994699	0.989133	0.963847
	24.9	0.994548	1.00416	0.992612	1.01046	0.994934	0.997003	1.00959	0.979637	0.995753			24.9	0.989528	0.988205	0.988126	0.997767	0.989568	0.986382	0.990034	0.982188	0.993042	0.99088	0.993486	0.997223	0.994403	0.993681			49.8	1.01183	1.00851	1.00547	1.01147	0.985018	0.985398	1.00427	0.992518	0.989133	0.956065
	25	0.993505	1.00797	0.992612	1.00556	0.994934	1.00007	1.00669	0.97861	0.997706			25	0.992364	0.98485	0.990246	0.992974	0.987581	0.980861	0.989101	0.983211	0.989025	0.988626	0.98925	0.996228	0.990801	0.990624			50	1.0212	1.00969	1.00411	1.01147	0.986351	0.983088	1.00192	0.992518	0.993952	0.957177
	25.1	0.994548	1.00321	0.989771	1.00654	0.993856	1.00109	1.00475	0.979637	0.993801			25.1	0.987638	0.985689	0.989186	0.993933	0.9846	0.979021	0.993767	0.991396	1.00208	0.986371	0.992427	0.999214	0.994403	0.991643			50.2	1.01885	1.01443	1.00547	1.01017	0.991683	0.965759	0.994885	0.985974	0.991542	0.956065
	25.2	0.996633	1.00035	0.992612	1.0036	0.989544	1.00007	1.00378	0.974503	0.992825			25.2	0.988583	0.989044	0.983885	0.982431	0.980626	0.979021	0.992834	0.989349	0.997058	0.987498	0.994545	0.995233	0.9896	0.987566			50.4	1.01534	1.01443	0.997348	1.00886	0.986351	0.956518	0.981979	0.969614	0.990338	0.95273
	25.3	0.997675	1.00511	0.992612	1.00654	0.993856	0.998026	1.00765	0.982718	0.99673			25.3	0.991418	0.983172	0.984945	0.987224	0.980626	0.979941	0.9947	0.990373	0.999066	0.988626	0.990309	0.994238	0.988399	0.986547			50.6	1.01183	1.00614	0.997348	1.00755	0.978354	0.947276	0.966728	0.957616	0.991542	0.956065
	25.4	0.994548	1.00701	0.989771	1.00458	0.994934	0.998026	1.00862	0.97861	0.997706			25.4	0.990473	0.982333	0.991306	0.986265	0.981619	0.979021	0.993767	0.989349	0.99505	0.988626	0.991368	0.998219	0.9896	0.986547			50.8	1.00714	0.999028	0.994641	1.00755	0.983685	0.946121	0.957342	0.951072	0.985518	0.958289
	25.5	0.994548	1.00797	0.993559	1.00458	0.99709	1.00518	1.00765	0.986825	0.992825			25.5	0.995199	0.988205	0.987065	0.987224	0.982613	0.978101	0.995633	0.984234	0.996054	0.985244	0.987131	0.995233	0.994403	0.989605			51	0.994262	0.990733	0.993288	1.00363	0.973022	0.936879	0.953822	0.948891	0.986723	0.958289
	25.6	0.99559	1.01082	0.991665	1.00556	0.992778	0.999048	1.00572	0.970395	0.991848			25.6	0.990473	0.987366	0.987065	0.986265	0.9846	0.979941	0.996566	0.993442	0.998062	0.984117	0.98925	0.994238	0.990801	0.986547			51.2	0.987235	0.985992	0.991935	1.00625	0.978354	0.936879	0.938571	0.943437	0.983109	0.958289
	25.7	0.988293	0.9994	0.993559	0.99673	0.988466	0.999048	1.00087	0.97861	0.991848			25.7	0.997089	0.988205	0.993427	0.989141	0.985594	0.981781	0.9947	0.987303	0.997058	0.986371	0.98925	0.995233	0.990801	0.988585			51.4	0.977866	0.983622	0.985168	0.998406	0.973022	0.936879	0.940917	0.935803	0.97588	0.954954
	25.8	0.992463	1.0013	0.993559	0.998692	0.994934	0.994958	0.999903	0.97861	0.994777			25.8	0.990473	0.98485	0.989186	0.984348	0.980626	0.982702	0.998432	0.989349	1.00007	0.987498	0.98819	0.998219	0.996805	0.991643			51.6	0.972011	0.975326	0.986522	1.00102	0.979687	0.931103	0.932704	0.935803	0.973471	0.95273
	25.9	0.994548	0.9994	0.992612	0.997711	0.992778	0.999048	1.00087	0.97861	0.994777			25.9	0.993309	0.9924	0.990246	0.989141	0.9846	0.983622	0.997499	0.991396	1.00107	0.981862	0.992427	0.998219	0.995604	0.992662			51.8	0.968497	0.968216	0.985168	1.00363	0.971689	0.931103	0.926838	0.929259	0.97588	0.954954
	26	0.993505	1.00701	0.989771	0.999673	0.989544	0.999048	1.00087	0.973476	0.990872			26	0.986693	0.98485	0.988126	0.989141	0.985594	0.983622	0.9947	0.982188	0.992038	0.985244	0.990309	0.998219	0.994403	0.987566			52	0.959129	0.962291	0.983815	1.00233	0.977021	0.924172	0.928012	0.927077	0.968651	0.957177
	26.1	0.988293	1.00226	0.993559	0.998692	0.993856	0.995981	1.00087	0.974503	0.994777			26.1	0.995199	0.993239	0.996607	0.986265	0.9846	0.983622	0.996566	0.989349	0.997058	0.984117	0.987131	0.997223	0.990801	0.988585			52.2	0.955615	0.95755	0.982462	1.00102	0.978354	0.925327	0.925665	0.929259	0.959013	0.94606
	26.2	0.992463	1.00321	0.994507	0.999673	0.990622	0.994958	1.00378	0.973476	0.989896			26.2	0.986693	0.986528	0.987065	0.984348	0.979632	0.981781	0.997499	0.984234	0.997058	0.982989	0.990309	0.995233	0.987198	0.986547			52.4	0.94976	0.946884	0.979755	0.998406	0.970356	0.925327	0.919799	0.922714	0.962627	0.94606
	26.3	0.99142	1.00035	0.997348	0.992806	0.9917	0.995981	1.00281	0.977583	0.992825			26.3	0.992364	0.990722	0.990246	0.984348	0.9846	0.981781	0.997499	0.989349	0.999066	0.986371	0.990309	0.996228	0.9896	0.986547			52.6	0.94976	0.95281	0.981109	1.00102	0.971689	0.920706	0.923319	0.925987	0.963832	0.95273
	26.4	0.986208	1.00416	1.00019	0.997711	0.985232	0.993935	1.00087	0.97553	0.989896			26.4	0.988583	0.989883	0.984945	0.988182	0.980626	0.981781	0.997499	0.988326	1.00007	0.981862	0.98925	0.997223	0.992002	0.992662			52.8	0.943904	0.946884	0.978402	0.995792	0.973022	0.921861	0.917453	0.922714	0.955399	0.948284
	26.5	0.989335	1.00416	0.999242	0.997711	0.990622	0.995981	1.00087	0.97553	0.999658			26.5	0.992364	0.990722	0.988126	0.986265	0.975658	0.976261	0.9947	0.985257	0.998062	0.982989	0.991368	0.997223	0.988399	0.986547			53	0.941562	0.943329	0.974342	0.990565	0.965025	0.921861	0.922146	0.920533	0.959013	0.953842
	26.6	0.989335	1.00226	0.997348	0.999673	0.98631	1.00109	1.00087	0.97861	0.993801			26.6	0.997089	0.990722	0.988126	0.988182	0.980626	0.977181	0.992834	0.98628	0.993042	0.986371	0.987131	0.996228	0.992002	0.991643			53.2	0.938049	0.943329	0.979755	0.995792	0.971689	0.920706	0.917453	0.919442	0.962627	0.951619
	26.7	0.984123	0.9994	0.998295	1.00164	0.987388	0.994958	1.00475	0.97553	0.991848			26.7	0.992364	0.997433	0.987065	0.987224	0.981619	0.980861	0.9947	0.990373	0.998062	0.982989	0.987131	0.995233	0.987198	0.987566			53.4	0.941562	0.945699	0.975696	0.995792	0.969023	0.919551	0.917453	0.923805	0.959013	0.953842
	26.8	0.98725	0.998449	0.997348	0.999673	0.990622	0.997003	1.00378	0.981691	0.992825			26.8	0.994254	0.994077	0.986005	0.985307	0.978639	0.980861	0.9947	0.988326	0.992038	0.982989	0.98819	0.992247	0.988399	0.987566			53.6	0.935707	0.938589	0.970283	0.989258	0.965025	0.920706	0.920972	0.923805	0.954194	0.95273
	26.9	0.985165	0.9994	0.993559	0.999673	0.990622	0.994958	1.00572	0.977583	0.993801			26.9	0.998034	0.994077	0.986005	0.984348	0.978639	0.980861	0.991901	0.987303	0.991034	0.984117	0.987131	0.990257	0.988399	0.986547			53.8	0.938049	0.940959	0.975696	0.995792	0.965025	0.918396	0.911587	0.918352	0.94817	0.951619
	27	0.990378	1.00321	0.993559	1.0036	0.988466	0.998026	1.00281	0.977583	0.987944			27	0.994254	0.993239	0.990246	0.987224	0.981619	0.981781	0.9947	0.991396	0.997058	0.980735	0.987131	0.995233	0.9896	0.988585			54	0.929851	0.931478	0.968929	0.995792	0.965025	0.919551	0.910413	0.919442	0.955399	0.954954
	27.1	0.992463	1.00226	0.992612	1.00458	0.98631	0.995981	1.00862	0.97553	0.987944			27.1	0.995199	0.994077	0.986005	0.988182	0.983607	0.981781	0.995633	0.989349	0.993042	0.984117	0.98925	0.995233	0.990801	0.989605			54.2	0.933365	0.936219	0.967576	0.993178	0.959693	0.916085	0.90924	0.917261	0.94817	0.948284
	27.2	0.990378	1.00416	0.992612	1.00556	0.989544	0.992913	1.00087	0.980664	0.989896			27.2	0.994254	0.995755	0.989186	0.990099	0.978639	0.984542	0.9947	0.993442	0.99505	0.985244	0.987131	0.993242	0.9896	0.988585			54.4	0.931022	0.931478	0.972989	0.987951	0.962359	0.91493	0.913933	0.918352	0.94817	0.944948
	27.3	0.989335	1.00035	0.993559	1.0085	0.989544	1.00109	1.00669	0.976556	0.992825			27.3	0.995199	0.993239	0.991306	0.988182	0.978639	0.980861	0.997499	0.991396	0.998062	0.986371	0.98925	0.992247	0.983595	0.981451			54.6	0.927509	0.930293	0.972989	0.991872	0.966357	0.916085	0.91628	0.917261	0.951784	0.950507
	27.4	0.988293	1.00226	0.989771	1.00458	0.988466	0.997003	1.00087	0.977583	0.991848			27.4	0.988583	0.991561	0.987065	0.988182	0.980626	0.983622	0.995633	0.987303	0.993042	0.984117	0.990309	0.994238	0.983595	0.98247			54.8	0.932193	0.933848	0.970283	0.993178	0.965025	0.916085	0.91628	0.91508	0.949375	0.947172
	27.5	0.988293	0.9994	0.990718	1.00654	0.989544	0.999048	0.998934	0.977583	0.98892			27.5	0.990473	0.997433	0.986005	0.992016	0.979632	0.983622	0.997499	0.993442	0.997058	0.979607	0.990309	0.994238	0.983595	0.98247			55	0.92868	0.932663	0.967576	0.989258	0.962359	0.918396	0.91276	0.917261	0.943351	0.94606
	27.6	0.990378	1.00416	0.994507	1.0085	0.98631	0.998026	1.00572	0.976556	0.989896			27.6	0.991418	0.994077	0.986005	0.996808	0.9846	0.984542	0.9947	0.991396	0.994046	0.985244	0.98819	0.995233	0.987198	0.987566			55.2	0.926338	0.926738	0.972989	0.987951	0.961026	0.916085	0.910413	0.920533	0.942146	0.957177
	27.7	0.990378	1.00035	0.986929	1.00262	0.985232	0.998026	1.00572	0.976556	0.989896			27.7	0.994254	0.998272	0.986005	0.99585	0.9846	0.985462	0.9947	0.993442	0.994046	0.985244	0.983954	0.992247	0.985997	0.987566			55.4	0.92868	0.927923	0.974342	0.993178	0.965025	0.919551	0.91276	0.919442	0.946965	0.950507
	27.8	0.98308	0.998449	0.982194	1.00262	0.987388	0.998026	0.999903	0.986825	0.985991			27.8	0.991418	0.994916	0.986005	0.987224	0.981619	0.980861	0.995633	0.989349	0.993042	0.981862	0.987131	0.991252	0.985997	0.984509			55.6	0.926338	0.927923	0.967576	0.989258	0.961026	0.916085	0.90924	0.919442	0.946965	0.947172
	27.9	0.986208	0.998449	0.985982	1.00752	0.987388	0.994958	0.999903	0.976556	0.99673			27.9	0.992364	0.994916	0.986005	0.993933	0.9846	0.982702	0.9947	0.992419	0.994046	0.981862	0.987131	0.996228	0.9896	0.989605			55.8	0.926338	0.925553	0.967576	0.989258	0.95836	0.91493	0.90924	0.917261	0.942146	0.947172
	28	0.98725	1.0013	0.989771	1.00752	0.980921	0.995981	0.996996	0.97553	0.991848			28	0.991418	0.994077	0.987065	0.988182	0.980626	0.980861	0.998432	0.995488	0.99505	0.981862	0.987131	0.994238	0.987198	0.986547			56	0.929851	0.926738	0.971636	0.990565	0.96769	0.910309	0.91276	0.913989	0.937327	0.941613
	28.1	0.99142	0.9994	0.985035	0.995749	0.981998	0.99189	0.996996	0.974503	0.990872			28.1	0.988583	0.994077	0.990246	0.985307	0.979632	0.986382	0.9947	0.994465	0.994046	0.984117	0.983954	0.991252	0.987198	0.987566			56.2	0.927509	0.924368	0.967576	0.984031	0.961026	0.913775	0.905721	0.911808	0.934917	0.941613
	28.2	0.989335	0.9994	0.991665	1.00164	0.987388	0.995981	0.997965	0.977583	0.991848			28.2	0.991418	0.994916	0.989186	0.982431	0.978639	0.979941	0.9947	0.987303	0.994046	0.981862	0.986072	0.992247	0.9896	0.990624			56.4	0.926338	0.924368	0.970283	0.995792	0.962359	0.91262	0.910413	0.920533	0.934917	0.94606
	28.3	0.990378	1.00511	0.985035	0.994768	0.984154	0.997003	1.00572	0.977583	0.985991			28.3	0.994254	1.00079	0.989186	0.985307	0.982613	0.988222	0.993767	0.991396	0.992038	0.981862	0.986072	0.992247	0.987198	0.985528			56.6	0.931022	0.927923	0.966223	0.990565	0.957027	0.911464	0.911587	0.91508	0.938532	0.941613
	28.4	0.986208	0.998449	0.992612	1.00556	0.984154	0.995981	1.00669	0.976556	0.994777			28.4	0.989528	0.993239	0.986005	0.986265	0.980626	0.988222	0.993767	0.992419	0.993042	0.981862	0.983954	0.991252	0.987198	0.989605			56.8	0.927509	0.926738	0.96487	0.989258	0.95836	0.913775	0.901028	0.912898	0.939736	0.94606
	28.5	0.994548	1.00416	0.985982	0.997711	0.985232	0.994958	1.00475	0.980664	0.986967			28.5	0.993309	0.993239	0.994487	0.982431	0.983607	0.986382	0.995633	0.994465	0.994046	0.97848	0.983954	0.997223	0.9896	0.988585			57	0.919311	0.917257	0.967576	0.989258	0.963692	0.919551	0.903374	0.91508	0.942146	0.94606
	28.6	0.98725	0.9994	0.988824	1.0036	0.983076	0.997003	1.00184	0.977583	0.986967			28.6	0.988583	0.996594	0.988126	0.985307	0.972678	0.986382	0.995633	0.990373	0.992038	0.980735	0.982895	0.992247	0.984796	0.986547			57.2	0.925167	0.924368	0.968929	0.989258	0.961026	0.916085	0.911587	0.919442	0.944556	0.949395
	28.7	0.989335	0.998449	0.988824	1.00065	0.980921	0.995981	1.00765	0.979637	0.987944			28.7	0.986693	0.994077	0.990246	0.981473	0.977645	0.982702	0.996566	0.994465	0.99505	0.980735	0.979717	0.993242	0.988399	0.988585			57.4	0.920482	0.923183	0.970283	0.990565	0.959693	0.916085	0.910413	0.919442	0.936122	0.93939
	28.8	0.990378	1.00226	0.988824	0.997711	0.987388	0.99189	1.01347	0.973476	0.993801			28.8	0.994254	0.988205	0.991306	0.982431	0.983607	0.979941	0.9947	0.989349	0.994046	0.984117	0.983954	0.994238	0.990801	0.989605			57.6	0.921654	0.925553	0.968929	0.987951	0.955694	0.916085	0.906894	0.91508	0.934917	0.940502
	28.9	0.99142	0.997497	0.990718	1.00164	0.983076	0.993935	1.00765	0.982718	0.990872			28.9	0.996144	0.989883	0.989186	0.985307	0.980626	0.980861	0.990967	0.984234	0.990029	0.980735	0.982895	0.996228	0.992002	0.990624			57.8	0.921654	0.921998	0.970283	0.993178	0.963692	0.911464	0.90924	0.913989	0.930098	0.944948
	29	0.992463	0.9994	0.990718	0.999673	0.988466	0.994958	1.00378	0.97861	0.990872			29	0.990473	0.991561	0.994487	0.986265	0.979632	0.981781	0.995633	0.989349	0.994046	0.984117	0.986072	0.997223	0.993203	0.991643			58	0.921654	0.920813	0.968929	0.987951	0.95836	0.913775	0.906894	0.908536	0.931303	0.940502
	29.1	0.98725	0.997497	0.988824	1.00262	0.979843	0.995981	1.00862	0.970395	0.985015			29.1	0.998979	0.993239	0.988126	0.986265	0.979632	0.979021	0.997499	0.988326	0.994046	0.982989	0.982895	0.996228	0.990801	0.990624			58.2	0.912285	0.920813	0.966223	0.989258	0.963692	0.91493	0.90924	0.918352	0.926484	0.944948
	29.2	0.988293	1.0013	0.985982	1.0036	0.981998	0.99189	1.00281	0.973476	0.984039			29.2	0.999924	0.993239	0.993427	0.989141	0.978639	0.979941	0.996566	0.990373	0.99505	0.979607	0.986072	0.994238	0.988399	0.988585			58.4	0.922825	0.926738	0.96487	0.986644	0.957027	0.91262	0.910413	0.912898	0.928893	0.943837
	29.3	0.98725	0.997497	0.991665	1.00164	0.985232	0.988823	1.01056	0.97861	0.987944			29.3	0.999924	0.986528	0.992366	0.988182	0.979632	0.979941	0.993767	0.989349	0.992038	0.981862	0.987131	0.995233	0.985997	0.986547			58.6	0.922825	0.921998	0.968929	0.987951	0.965025	0.913775	0.908067	0.913989	0.928893	0.941613
	29.4	0.986208	0.997497	0.985035	0.993787	0.981998	1.00007	1.00862	0.972449	0.986967			29.4	0.990473	0.98485	0.989186	0.985307	0.977645	0.978101	0.9947	0.991396	0.99505	0.982989	0.983954	0.997223	0.988399	0.988585			58.8	0.919311	0.917257	0.967576	0.985338	0.955694	0.91262	0.908067	0.917261	0.933712	0.944948
	29.5	0.988293	0.9994	0.985982	0.997711	0.985232	0.988823	1.0125	0.974503	0.989896			29.5	0.989528	0.988205	0.989186	0.988182	0.976652	0.980861	0.996566	0.989349	0.997058	0.984117	0.987131	0.995233	0.988399	0.987566			59	0.916969	0.919627	0.967576	0.987951	0.957027	0.910309	0.908067	0.91508	0.927688	0.944948
	29.6	0.985165	0.99369	0.986929	0.999673	0.980921	0.994958	0.999903	0.974503	0.986967			29.6	0.989528	0.985689	0.990246	0.988182	0.976652	0.980861	0.995633	0.988326	0.993042	0.985244	0.986072	0.997223	0.988399	0.992662			59.2	0.91814	0.916072	0.968929	0.993178	0.959693	0.913775	0.902201	0.91617	0.922869	0.940502
	29.7	0.985165	0.998449	0.986929	1.00164	0.983076	0.988823	1.00862	0.974503	0.987944			29.7	0.993309	0.988205	0.989186	0.986265	0.976652	0.978101	0.9947	0.98628	0.99505	0.987498	0.987131	0.996228	0.990801	0.990624			59.4	0.91814	0.918442	0.971636	0.991872	0.961026	0.913775	0.919799	0.918352	0.921665	0.93939
	29.8	0.988293	0.997497	0.988824	1.0036	0.985232	0.993935	0.998934	0.973476	0.989896			29.8	0.989528	0.988205	0.989186	0.98339	0.974665	0.9735	0.990034	0.990373	0.992038	0.977353	0.98819	0.994238	0.9896	0.989605			59.6	0.923996	0.924368	0.968929	0.989258	0.959693	0.918396	0.908067	0.913989	0.92046	0.942725
	29.9	0.988293	0.9994	0.986929	0.997711	0.979843	1.00007	1.00281	0.97553	0.989896			29.9	0.994254	0.989883	0.994487	0.980514	0.978639	0.97074	0.991901	0.989349	0.99505	0.980735	0.990309	0.996228	0.992002	0.992662			59.8	0.919311	0.920813	0.968929	0.987951	0.961026	0.91493	0.905721	0.911808	0.922869	0.93939
	30	0.98725	0.996545	0.985982	0.99673	0.985232	0.988823	1.00959	0.982718	0.990872			30	0.988583	0.978978	0.990246	0.987224	0.982613	0.9735	0.991901	0.988326	0.989025	0.981862	0.982895	0.994238	0.987198	0.986547			60	0.920482	0.921998	0.971636	0.991872	0.955694	0.916085	0.908067	0.913989	0.922869	0.938278
	30.1	0.984123	0.99369	0.986929	1.0036	0.980921	0.998026	1.00378	0.973476	0.991848			30.1	0.992364	0.989044	0.993427	0.988182	0.983607	0.97166	0.990967	0.987303	0.989025	0.982989	0.986072	0.996228	0.987198	0.988585
	30.2	0.98725	0.997497	0.984088	0.999673	0.984154	0.989845	1.00765	0.981691	0.991848			30.2	0.980077	0.990722	0.986005	0.989141	0.983607	0.978101	0.990034	0.985257	0.989025	0.979607	0.985013	0.997223	0.985997	0.985528
	30.3	0.990378	0.9994	0.985982	1.00262	0.980921	0.995981	1.0125	0.97861	0.990872			30.3	0.988583	0.988205	0.990246	0.990099	0.990561	0.9735	0.992834	0.988326	0.992038	0.982989	0.986072	0.996228	0.990801	0.991643
	30.4	0.986208	0.995593	0.982194	0.995749	0.981998	0.993935	1.01056	0.976556	0.990872			30.4	0.992364	0.9924	0.994487	0.996808	0.990561	0.979021	0.993767	0.987303	0.994046	0.982989	0.982895	0.998219	0.990801	0.990624
	30.5	0.982038	0.997497	0.988824	0.999673	0.980921	0.992913	1.00862	0.979637	0.990872			30.5	0.987638	0.994916	0.991306	0.996808	0.989568	0.977181	0.992834	0.989349	0.99505	0.982989	0.987131	0.999214	0.987198	0.987566
	30.6	0.985165	0.996545	0.988824	0.997711	0.980921	0.99189	1.00184	0.979637	0.989896			30.6	0.985748	0.9924	0.993427	0.993933	0.999503	0.980861	0.993767	0.988326	0.999066	0.979607	0.987131	1.00021	0.992002	0.991643
	30.7	0.982038	0.991786	0.988824	0.99673	0.979843	0.99189	1.01153	0.973476	0.985015			30.7	0.993309	1.00331	0.998728	1.00256	0.99851	0.987302	0.996566	0.994465	1.00409	0.980735	0.98819	1.00319	0.992002	0.9947
	30.8	0.982038	0.996545	0.989771	1.0036	0.981998	0.994958	1.00959	0.976556	0.987944			30.8	0.992364	1.0075	0.997668	1.00448	1.00248	0.987302	0.997499	0.996511	1.00409	0.980735	0.986072	1.0022	0.994403	0.9947
	30.9	0.980995	0.996545	0.985982	1.0036	0.978765	0.998026	1.00765	0.965261	0.989896			30.9	0.990473	1.01086	1.00191	1.01023	1.01043	0.994663	1.00123	0.996511	1.01212	0.979607	0.985013	1.00718	0.996805	0.99572
	31	0.980995	0.990834	0.980299	0.999673	0.984154	0.9878	1.0125	0.97553	0.993801			31	0.995199	1.01841	1.00721	1.02365	1.01043	0.996503	1.00403	1.00265	1.01614	0.982989	0.986072	1.01016	0.996805	0.997758
	31.1	0.984123	0.9994	0.983141	0.997711	0.980921	0.997003	1.01056	0.973476	0.986967			31.1	0.999924	1.02092	1.01039	1.02173	1.0154	0.997424	1.0059	1.00674	1.01915	0.981862	0.985013	1.01713	1.00041	0.998777
	31.2	0.979953	0.994641	0.988824	0.998692	0.981998	0.990868	0.998934	0.972449	0.985991			31.2	0.998979	1.02679	1.00933	1.0294	1.01441	1.00018	1.00683	1.00777	1.02116	0.981862	0.983954	1.01912	1.00161	1.00082
	31.3	0.98308	0.991786	0.988824	1.00065	0.980921	0.992913	1.01153	0.97553	0.986967			31.3	0.999924	1.03015	1.01569	1.02748	1.00845	1.00294	1.01243	1.01288	1.02417	0.982989	0.983954	1.02409	1.00641	1.00489
	31.4	0.98308	0.991786	0.985982	0.99673	0.98631	0.995981	1.00959	0.982718	0.98892			31.4	1.00276	1.02931	1.01463	1.02365	1.0154	1.00386	1.01056	1.01697	1.02818	0.981862	0.985013	1.03007	1.01002	1.00795
	31.5	0.986208	0.99369	0.989771	1.00262	0.984154	0.994958	1.00765	0.979637	0.992825			31.5	1.00276	1.03434	1.01993	1.0294	1.01143	1.0057	1.01056	1.01288	1.02718	0.982989	0.986072	1.03305	1.01242	1.00897
	31.6	0.985165	0.997497	0.986929	1.00262	0.983076	0.997003	1.00765	0.977583	0.985015			31.6	1.01316	1.03938	1.01993	1.03035	1.01639	1.00847	1.01523	1.02107	1.0312	0.976226	0.982895	1.03206	1.01362	1.01305
	31.7	0.980995	0.99369	0.984088	0.998692	0.980921	0.992913	1.00862	0.974503	0.985991			31.7	1.0141	1.03938	1.01993	1.03515	1.01441	1.00755	1.01243	1.02209	1.0322	0.981862	0.983954	1.03106	1.01122	1.01305
	31.8	0.982038	0.989882	0.989771	1.00262	0.978765	0.989845	1.0125	0.97861	0.983062			31.8	1.00843	1.03686	1.02311	1.03131	1.01242	1.00939	1.01056	1.018	1.02517	0.980735	0.985013	1.03305	1.01602	1.01916
	31.9	0.982038	0.990834	0.989771	1.00065	0.979843	0.989845	1.00281	0.972449	0.986967			31.9	1.01599	1.03267	1.02841	1.03323	1.0154	1.01123	1.01243	1.02414	1.0322	0.987498	0.991368	1.03504	1.01722	1.02222
	32	0.98308	0.992738	0.981246	0.999673	0.976609	0.993935	1.00087	0.973476	0.984039			32	1.02261	1.03267	1.03265	1.03131	1.01043	1.00939	1.0143	1.02311	1.0312	0.987498	0.993486	1.03703	1.02203	1.03241
	32.1	0.982038	0.990834	0.981246	1.00164	0.978765	0.990868	1.00959	0.971422	0.984039			32.1	1.02922	1.03602	1.02947	1.03323	1.01341	1.01031	1.01336	1.02414	1.03421	0.984117	0.98925	1.03504	1.02082	1.03445
	32.2	0.980995	0.991786	0.982194	1.0036	0.975531	0.986777	1.01444	0.970395	0.984039			32.2	1.02639	1.03938	1.03159	1.03131	1.01441	1.00478	1.01616	1.02925	1.03823	0.985244	0.990309	1.03405	1.01602	1.03037
	32.3	0.980995	0.99369	0.978405	0.997711	0.977687	0.986777	1.00765	0.972449	0.986967			32.3	1.03206	1.04357	1.03372	1.03227	1.01441	1.01031	1.01336	1.02107	1.02919	0.982989	0.98925	1.04002	1.02203	1.04158
	32.4	0.98308	0.992738	0.986929	1.00164	0.978765	0.986777	1.00572	0.974503	0.986967			32.4	1.03962	1.0377	1.03902	1.03131	1.01341	1.00847	1.0143	1.0272	1.03722	0.985244	0.992427	1.03902	1.02082	1.04158
	32.5	0.97891	0.99369	0.982194	1.0036	0.974453	0.990868	1.00572	0.968341	0.985991			32.5	1.04434	1.04525	1.03902	1.02748	1.01739	1.00939	1.01616	1.02823	1.03521	0.984117	0.991368	1.04002	1.02082	1.04566
	32.6	0.98725	0.994641	0.981246	0.995749	0.979843	0.986777	1.01056	0.976556	0.98892			32.6	1.04812	1.04777	1.0369	1.03131	1.01739	1.01123	1.0143	1.0313	1.03722	0.985244	0.993486	1.03703	1.01962	1.04872
	32.7	0.986208	0.995593	0.983141	0.999673	0.977687	0.9878	1.01444	0.973476	0.985015			32.7	1.04907	1.04777	1.04326	1.03515	1.02037	1.01031	1.01709	1.0272	1.03421	0.982989	0.994545	1.03604	1.01722	1.0477
	32.8	0.980995	0.997497	0.979352	0.991825	0.978765	0.9878	1.00475	0.97553	0.98892			32.8	1.05002	1.0486	1.03796	1.03706	1.01639	1.01031	1.01616	1.02925	1.03421	0.984117	0.995605	1.03604	1.01842	1.05075
	32.9	0.980995	0.998449	0.982194	0.998692	0.979843	0.989845	1.00184	0.97553	0.989896			32.9	1.05002	1.04693	1.0369	1.03227	1.01639	1.00847	1.01709	1.0272	1.03823	0.986371	0.996664	1.03703	1.02323	1.05483
	33	0.98308	0.998449	0.983141	0.99673	0.976609	0.992913	1.00281	0.974503	0.980134			33	1.05758	1.05196	1.03796	1.03035	1.02136	1.00755	1.01709	1.0313	1.03923	0.989753	0.999841	1.03703	1.02563	1.05993
	33.1	0.985165	1.00226	0.977458	0.989863	0.974453	0.988823	1.00669	0.977583	0.985991			33.1	1.05758	1.0486	1.03796	1.03227	1.01838	1.00755	1.01989	1.02823	1.03923	0.986371	0.996664	1.04201	1.02443	1.05789
	33.2	0.984123	0.9994	0.982194	0.993787	0.977687	0.988823	1.00184	0.97553	0.985991			33.2	1.06419	1.04777	1.04008	1.03419	1.01739	1.01031	1.01989	1.03539	1.04124	0.992008	0.999841	1.04499	1.02443	1.05789
	33.3	0.98725	1.00035	0.985982	0.990844	0.977687	0.99189	1.01153	0.970395	0.985991			33.3	1.05947	1.05028	1.03902	1.03419	1.02037	1.00478	1.01523	1.02414	1.03421	0.993135	0.999841	1.04698	1.02443	1.05789
	33.4	0.98725	1.00416	0.988824	0.99673	0.975531	0.993935	1.01541	0.974503	0.985991			33.4	1.05758	1.04693	1.03584	1.03706	1.02335	1.00755	1.01989	1.03027	1.03823	0.996517	1.00302	1.04201	1.01722	1.05075
	33.5	0.985165	1.00511	0.987876	0.997711	0.976609	0.992913	1.00765	0.970395	0.983062			33.5	1.0623	1.04609	1.03478	1.03706	1.01937	1.00662	1.01803	1.0313	1.03722	0.99088	1.0009	1.044	1.02203	1.05585
	33.6	0.980995	0.998449	0.988824	0.999673	0.974453	0.99189	1.00765	0.97553	0.98111			33.6	1.06136	1.04525	1.03584	1.03419	1.02335	1.00294	1.0143	1.03232	1.0322	0.997644	1.00726	1.04499	1.02683	1.05993
	33.7	0.985165	1.00035	0.986929	0.994768	0.974453	0.989845	1.00765	0.969368	0.984039			33.7	1.05758	1.04525	1.03796	1.03802	1.01937	1.01031	1.01989	1.03232	1.03923	0.992008	1.00196	1.04599	1.02683	1.06298
	33.8	0.986208	1.00226	0.987876	0.999673	0.978765	0.986777	1.00765	0.976556	0.989896			33.8	1.05947	1.05028	1.03796	1.03515	1.02136	1.00478	1.01803	1.0313	1.03722	0.993135	0.998782	1.04698	1.02323	1.05891
	33.9	0.984123	0.998449	0.985982	1.00262	0.975531	0.992913	1.00281	0.97553	0.984039			33.9	1.06041	1.05112	1.03902	1.03419	1.02037	1.0057	1.01896	1.02925	1.03823	0.995389	1.00408	1.04201	1.02323	1.05993
	34	0.982038	1.00035	0.986929	1.00065	0.978765	0.989845	1.00959	0.974503	0.983062			34	1.06136	1.04944	1.03796	1.03802	1.0154	1.00755	1.02549	1.0313	1.03823	0.998771	1.00302	1.04101	1.02443	1.06095
	34.1	0.98725	0.997497	0.985035	0.997711	0.977687	0.99189	1.01056	0.979637	0.985991			34.1	1.06797	1.04693	1.04114	1.03227	1.02235	1.00386	1.02923	1.03641	1.04325	0.999899	1.0009	1.04201	1.02082	1.05993
	34.2	0.979953	1.00226	0.988824	1.0036	0.979843	0.99189	1.01153	0.977583	0.987944			34.2	1.06892	1.04777	1.03902	1.03515	1.02037	1.00386	1.02736	1.03232	1.04023	1.00215	1.0009	1.04201	1.01842	1.05993
	34.3	0.979953	0.997497	0.988824	0.997711	0.976609	0.993935	1.00378	0.977583	0.986967			34.3	1.06797	1.04693	1.0422	1.03419	1.02335	1.00662	1.02829	1.03334	1.04023	1.00328	1.00726	1.04101	1.01602	1.05687
	34.4	0.98308	0.997497	0.987876	0.998692	0.978765	0.990868	1.01056	0.973476	0.986967			34.4	1.05852	1.05196	1.03372	1.03994	1.01838	1.01031	1.02643	1.0272	1.03321	1.00328	1.00302	1.03902	1.01722	1.05891
	34.5	0.97891	0.996545	0.989771	1.00065	0.979843	0.988823	1.01056	0.981691	0.98892			34.5	1.06419	1.05196	1.03796	1.03898	1.01639	1.00939	1.02736	1.03027	1.04023	1.00103	1.0009	1.04599	1.01842	1.06095
	34.6	0.979953	0.996545	0.988824	0.993787	0.979843	0.994958	1.01541	0.981691	0.984039			34.6	1.06136	1.04693	1.03796	1.03419	1.01639	1.00386	1.03109	1.03437	1.04425	1.00103	1.00514	1.03902	1.01962	1.06095
	34.7	0.986208	1.00035	0.991665	0.997711	0.981998	0.99189	1.01444	0.974503	0.986967			34.7	1.0623	1.05112	1.04326	1.03227	1.02335	1.00294	1.03109	1.0313	1.03722	1.00103	1.0009	1.04599	1.02203	1.06095
	34.8	0.982038	0.996545	0.990718	0.998692	0.980921	0.994958	1.01056	0.974503	0.983062			34.8	1.06797	1.04525	1.04326	1.03994	1.02037	1.00386	1.03202	1.03539	1.04224	1.00553	1.00302	1.04002	1.01962	1.05789
	34.9	0.982038	0.998449	0.989771	0.994768	0.983076	0.99189	1.00765	0.976556	0.985015			34.9	1.0623	1.04357	1.0369	1.03227	1.02037	1.0057	1.03202	1.04051	1.04726	1.00666	1.00302	1.03803	1.02082	1.05789
	35	0.98725	0.9994	0.989771	0.997711	0.978765	0.992913	1.00475	0.970395	0.982086			35	1.06325	1.04022	1.03796	1.03515	1.01937	1.00662	1.03202	1.03437	1.04224	1.00441	1.0009	1.03902	1.02323	1.06095
	35.1	0.98308	1.0013	0.990718	0.995749	0.978765	0.993935	1.00378	0.974503	0.982086			35.1	1.06419	1.05112	1.03902	1.03227	1.02037	1.0057	1.02923	1.03539	1.04626	1.00779	1.00302	1.03902	1.02082	1.05585
	35.2	0.985165	0.998449	0.988824	0.998692	0.977687	0.99189	1.01056	0.972449	0.987944			35.2	1.05947	1.04944	1.03902	1.03227	1.01639	1.00847	1.02923	1.03744	1.04927	1.00779	1.00408	1.03703	1.01362	1.05483
	35.3	0.98725	1.00416	0.987876	0.998692	0.976609	0.99189	0.999903	0.977583	0.984039			35.3	1.06325	1.0486	1.04008	1.03131	1.02335	1.00755	1.03016	1.03948	1.05128	1.00666	1.00408	1.03902	1.02082	1.06095
	35.4	0.984123	1.00035	0.985982	0.997711	0.979843	0.995981	0.999903	0.971422	0.989896			35.4	1.06325	1.05196	1.04538	1.03515	1.02136	1.00755	1.02829	1.03846	1.04626	1.00779	1.00196	1.03902	1.01962	1.06298
	35.5	0.982038	1.00226	0.985035	1.0036	0.973375	0.995981	1.00184	0.974503	0.98111			35.5	1.06514	1.04693	1.04644	1.03131	1.02235	1.00478	1.02549	1.03232	1.04224	1.00779	1.00196	1.04002	1.01722	1.05993
	35.6	0.982038	0.995593	0.985035	1.00556	0.974453	0.99189	0.997965	0.971422	0.983062			35.6	1.06797	1.05196	1.04432	1.03515	1.02136	1.00847	1.02456	1.03027	1.04325	1.00666	1.0009	1.04101	1.01602	1.05891
	35.7	0.986208	0.998449	0.985982	1.0036	0.979843	0.990868	1.00378	0.973476	0.986967			35.7	1.06136	1.04944	1.04432	1.03131	1.01838	1.00755	1.02643	1.0313	1.03923	1.00779	1.00302	1.04101	1.02203	1.06196
	35.8	0.986208	1.00035	0.985035	1.00654	0.976609	0.993935	1.00959	0.966288	0.984039			35.8	1.05758	1.05028	1.04432	1.02748	1.02037	1.00386	1.02643	1.03334	1.03622	1.00892	1.00302	1.04201	1.01722	1.05891
	35.9	0.98725	0.996545	0.988824	1.00556	0.980921	0.992913	1.0125	0.97553	0.986967			35.9	1.06608	1.0486	1.04326	1.03131	1.01341	1.00847	1.02363	1.02823	1.03823	1.00892	1.00408	1.03803	1.01722	1.06095
	36	0.98725	1.00035	0.985982	1.00065	0.976609	1.00007	1.01347	0.971422	0.986967			36	1.06419	1.04944	1.04962	1.02748	1.01937	1.00755	1.02269	1.02823	1.03923	1.00892	1.00408	1.04002	1.01962	1.06196
	36.1	0.98308	0.992738	0.981246	1.0036	0.976609	0.992913	1.00862	0.974503	0.986967			36.1	1.06136	1.04609	1.04856	1.02844	1.01937	1.00847	1.02736	1.03232	1.04325	1.00666	1.00196	1.03803	1.02323	1.06502
	36.2	0.982038	0.998449	0.977458	0.997711	0.973375	0.995981	1.00669	0.968341	0.985015			36.2	1.06325	1.04525	1.04644	1.03227	1.01739	1.00847	1.02456	1.03334	1.03722	1.00779	1.00514	1.03803	1.02203	1.06502
	36.3	0.986208	0.997497	0.978405	1.00164	0.975531	0.994958	1.00572	0.967315	0.985991			36.3	1.06041	1.04525	1.04326	1.02652	1.01838	1.00478	1.02363	1.03334	1.03722	1.00892	1.00514	1.043	1.02082	1.064
	36.4	0.979953	0.9994	0.979352	1.00065	0.976609	0.989845	1.00184	0.973476	0.98892			36.4	1.06892	1.04525	1.0422	1.02748	1.02534	1.00294	1.02736	1.03334	1.04124	1.01117	1.00514	1.03604	1.01722	1.06095
	36.5	0.984123	1.00226	0.981246	0.999673	0.974453	0.988823	0.99409	0.970395	0.984039			36.5	1.06325	1.04777	1.04644	1.02748	1.01341	1.00939	1.02736	1.03334	1.04325	1.00666	0.999841	1.03703	1.01842	1.06298
	36.6	0.98308	1.00226	0.985035	1.00948	0.975531	0.990868	1.00669	0.976556	0.985015			36.6	1.06892	1.04189	1.04114	1.02077	1.02037	1.00202	1.02829	1.03948	1.04023	1.00779	1.0009	1.03405	1.01962	1.064
	36.7	0.982038	0.99369	0.980299	1.00654	0.974453	0.992913	1.00475	0.97861	0.985991			36.7	1.06514	1.04609	1.04432	1.03035	1.02136	1.00662	1.02736	1.03744	1.04023	1.01004	1.00196	1.03206	1.01602	1.05993
	36.8	0.989335	0.998449	0.980299	1.00948	0.970141	0.989845	0.996996	0.970395	0.985015			36.8	1.06325	1.04273	1.04856	1.03323	1.02136	1.00662	1.02829	1.03437	1.04325	1.00779	1.00302	1.03604	1.01722	1.05993
	36.9	0.980995	0.995593	0.985035	1.00654	0.971219	0.9878	1.00087	0.972449	0.984039			36.9	1.06703	1.04357	1.04326	1.03227	1.01341	1.00478	1.02923	1.03846	1.04325	1.0123	1.00302	1.03604	1.01482	1.05993
	37	0.980995	0.99369	0.980299	1.00262	0.972297	0.985755	0.998934	0.971422	0.984039			37	1.06608	1.03938	1.05386	1.0294	1.02136	1.00294	1.02643	1.03744	1.04023	1.01343	1.0062	1.03405	1.01122	1.05483
	37.1	0.986208	0.998449	0.985035	1.00752	0.973375	0.99189	1.00765	0.969368	0.984039			37.1	1.06514	1.04357	1.05174	1.0294	1.01639	1.00662	1.03109	1.03437	1.03923	1.00441	1.0009	1.03504	1.01482	1.05993
	37.2	0.986208	0.995593	0.984088	0.998692	0.974453	0.995981	1.00669	0.971422	0.982086			37.2	1.06514	1.04105	1.05174	1.03323	1.01937	1.00478	1.02643	1.04051	1.04124	1.00441	0.998782	1.03703	1.01482	1.05993
	37.3	0.984123	0.996545	0.979352	1.00164	0.973375	0.986777	1.00378	0.973476	0.987944			37.3	1.07081	1.04105	1.0528	1.0294	1.02037	1.00202	1.02643	1.03948	1.03823	1.00441	0.998782	1.03604	1.01482	1.05993
	37.4	0.979953	0.994641	0.976511	0.997711	0.972297	0.997003	1.00959	0.971422	0.984039			37.4	1.06136	1.04777	1.05174	1.03035	1.0154	1.00294	1.02643	1.03846	1.03722	1.00553	1.0009	1.03206	1.01482	1.05789
	37.5	0.980995	0.996545	0.978405	1.00065	0.967985	0.99189	1.00475	0.968341	0.979158			37.5	1.06514	1.04357	1.05174	1.02748	1.0154	1.00294	1.02736	1.03846	1.04023	1.00779	1.00514	1.03206	1.01482	1.05789
	37.6	0.988293	0.996545	0.978405	1.00458	0.974453	0.985755	1.00572	0.971422	0.985991			37.6	1.06419	1.05112	1.05386	1.0294	1.01341	1.00478	1.02549	1.03539	1.03421	1.01004	1.00302	1.03504	1.01242	1.05891
	37.7	0.98308	0.996545	0.982194	1.00654	0.970141	0.994958	1.00765	0.97553	0.984039			37.7	1.05947	1.05196	1.05704	1.03419	1.02037	1.0057	1.02923	1.03948	1.04023	1.00328	1.00514	1.03405	1.01482	1.05891
	37.8	0.982038	0.997497	0.984088	1.0085	0.970141	0.9878	1.00765	0.969368	0.983062			37.8	1.06514	1.0486	1.05704	1.03706	1.01937	1.00939	1.02643	1.03437	1.03923	1.00215	1.00302	1.03305	1.01362	1.05891
	37.9	0.982038	0.992738	0.980299	1.00752	0.972297	0.99189	1.00475	0.966288	0.980134			37.9	1.06797	1.04525	1.05916	1.03515	1.01639	1.00755	1.02923	1.04153	1.04626	1.00553	1.00514	1.02907	1.01362	1.06095
	38	0.985165	0.998449	0.979352	1.00556	0.971219	0.990868	1.00475	0.969368	0.983062			38	1.06703	1.04441	1.05916	1.03706	1.02434	1.00478	1.02736	1.03846	1.03622	0.999899	1.00196	1.03106	1.01602	1.05993
	38.1	0.98725	0.9994	0.980299	1.00262	0.973375	0.99189	1.00281	0.97553	0.982086			38.1	1.06136	1.04693	1.05916	1.03515	1.01838	1.00478	1.03016	1.04255	1.03622	1.00441	1.0062	1.03206	1.00882	1.05585
	38.2	0.98308	0.992738	0.978405	0.998692	0.974453	0.994958	1.00087	0.97553	0.98111			38.2	1.06797	1.05448	1.05704	1.03227	1.01639	1.0057	1.02829	1.03437	1.04023	0.998771	0.999841	1.03007	1.01242	1.05585
	38.3	0.979953	0.992738	0.977458	1.00262	0.975531	0.992913	1.0125	0.972449	0.984039			38.3	1.06608	1.05448	1.06022	1.03035	1.01739	1.00386	1.02923	1.03846	1.04224	1.00215	1.00408	1.02907	1.01362	1.05789
	38.4	0.98308	0.996545	0.979352	1.00262	0.974453	0.988823	1.01153	0.974503	0.98111			38.4	1.06514	1.0486	1.06022	1.03323	1.01838	1.00478	1.02923	1.03846	1.03923	1.00553	1.0062	1.02907	1.01242	1.05789
	38.5	0.982038	0.9994	0.973669	1.00458	0.974453	0.994958	1.0125	0.974503	0.98111			38.5	1.06419	1.05028	1.05704	1.03611	1.01838	1.0057	1.02549	1.03846	1.03722	1.00328	1.00514	1.02409	1.01602	1.05789
	38.6	0.979953	0.994641	0.975564	1.0036	0.975531	0.994958	1.01056	0.971422	0.984039			38.6	1.05947	1.05196	1.06128	1.03898	1.01937	1.00294	1.02176	1.03744	1.03722	1.00553	1.00831	1.0221	1.01482	1.05993
	38.7	0.97891	0.995593	0.975564	1.00458	0.973375	0.994958	1.01347	0.970395	0.983062			38.7	1.0623	1.0528	1.05704	1.0409	1.01043	1.00294	1.02549	1.03437	1.03823	1.00328	1.0062	1.02708	1.01842	1.06604
	38.8	0.986208	0.998449	0.976511	1.0036	0.972297	0.993935	1.0125	0.971422	0.980134			38.8	1.06797	1.0528	1.06128	1.0294	1.01739	1.0011	1.02829	1.03744	1.04124	1.00215	1.00302	1.0231	1.01482	1.064
	38.9	0.982038	0.996545	0.970828	1.00556	0.971219	0.989845	1.00475	0.969368	0.979158			38.9	1.06986	1.04944	1.0634	1.03706	1.01937	1.0057	1.02923	1.03641	1.03923	1.00328	1.00514	1.02409	1.01362	1.06196
	39	0.984123	0.997497	0.975564	1.00458	0.967985	0.990868	1.00959	0.973476	0.976229			39	1.06703	1.0486	1.0581	1.03706	1.01639	1.00478	1.02363	1.03641	1.03622	1.00553	1.01149	1.02011	1.01122	1.05789
	39.1	0.97891	0.996545	0.979352	1.00556	0.969063	0.992913	1.00862	0.968341	0.977205			39.1	1.06419	1.05196	1.06022	1.03802	1.02434	1.00478	1.02456	1.03437	1.0312	1.00666	1.00831	1.02708	1.01602	1.064
	39.2	0.98308	0.992738	0.979352	1.0036	0.971219	0.986777	1.00378	0.969368	0.98111			39.2	1.06703	1.05112	1.06128	1.03994	1.01838	1.00478	1.02736	1.03539	1.03622	1.00553	1.00726	1.02409	1.01242	1.05891
	39.3	0.986208	1.00416	0.981246	1.00262	0.973375	0.99189	1.01153	0.970395	0.978181			39.3	1.07175	1.04944	1.06234	1.04281	1.01639	1.0011	1.02456	1.03437	1.03722	1.00441	1.00937	1.02111	1.01242	1.05687
	39.4	0.98308	0.997497	0.975564	0.993787	0.974453	0.9878	1.01637	0.970395	0.980134			39.4	1.06703	1.05196	1.06234	1.03898	1.01739	1.00386	1.02923	1.03744	1.04224	1.00666	1.00831	1.0231	1.01242	1.05993
	39.5	0.986208	1.00226	0.978405	0.995749	0.970141	0.992913	1.00087	0.967315	0.978181			39.5	1.06325	1.04777	1.06446	1.03994	1.01838	0.999264	1.02083	1.03027	1.03521	1.00553	1.00514	1.0231	1.01602	1.06196
	39.6	0.984123	0.9994	0.977458	0.997711	0.972297	0.99189	0.996028	0.966288	0.98111			39.6	1.06892	1.04441	1.0634	1.04473	1.01838	1.00294	1.02456	1.03641	1.03823	1.00328	1.00514	1.02111	1.01242	1.05891
	39.7	0.985165	1.00035	0.984088	1.0036	0.970141	0.986777	1.00184	0.969368	0.98111			39.7	1.0623	1.04777	1.0634	1.04281	1.01937	0.998344	1.02269	1.03334	1.03823	1.00328	1.00196	1.0221	1.01242	1.06095
	39.8	0.98725	0.996545	0.984088	1.0036	0.972297	0.9878	1.00669	0.963207	0.98111			39.8	1.06514	1.05028	1.06552	1.04761	1.01043	1.00202	1.02083	1.03334	1.03622	0.998771	0.999841	1.02409	1.01362	1.05993
	39.9	0.985165	0.9994	0.978405	0.998692	0.970141	0.993935	0.997965	0.972449	0.98111			39.9	1.0623	1.04525	1.06234	1.04473	1.01739	1.00294	1.02176	1.03027	1.03823	1.00215	1.00302	1.01912	1.00882	1.05585
	40	0.986208	0.9994	0.977458	1.00164	0.976609	0.9878	1.01056	0.972449	0.982086			40	1.06419	1.04944	1.06658	1.03515	1.01838	0.998344	1.02829	1.03539	1.04023	1.00441	1.00302	1.0221	1.01362	1.05993
	40.1	0.985165	0.99369	0.982194	1.0036	0.978765	0.99189	1.00281	0.970395	0.983062
	40.2	0.98308	0.998449	0.976511	1.0036	0.970141	0.994958	1.00669	0.972449	0.974276
	40.3	0.985165	0.995593	0.978405	0.998692	0.975531	0.986777	1.01056	0.971422	0.979158
	40.4	0.982038	0.9994	0.981246	1.00458	0.973375	0.993935	1.00862	0.971422	0.976229
	40.5	0.986208	1.00321	0.980299	1.00164	0.972297	0.99189	0.999903	0.976556	0.972324
	40.6	0.986208	0.99369	0.981246	1.00065	0.972297	0.989845	1.01541	0.968341	0.977205
	40.7	0.984123	0.994641	0.976511	0.999673	0.976609	0.989845	1.01734	0.974503	0.977205
	40.8	0.984123	0.99369	0.972722	1.00164	0.971219	0.99189	0.999903	0.968341	0.975253
	40.9	0.98308	0.991786	0.977458	0.999673	0.972297	0.986777	1.00862	0.967315	0.978181
	41	0.98308	0.991786	0.971775	1.00065	0.974453	0.9878	1.01056	0.974503	0.977205
	41.1	0.977868	0.989882	0.969881	0.992806	0.973375	0.989845	1.01056	0.968341	0.971348
	41.2	0.982038	0.989882	0.962303	1.00065	0.971219	0.9878	1.00765	0.967315	0.974276
	41.3	0.982038	0.98893	0.968934	0.995749	0.966907	0.989845	1.00765	0.963207	0.976229
	41.4	0.980995	0.99369	0.967986	0.997711	0.972297	0.985755	1.00765	0.970395	0.977205
	41.5	0.98308	0.990834	0.969881	0.995749	0.972297	0.990868	1.00669	0.968341	0.975253
	41.6	0.97891	0.995593	0.970828	0.99673	0.973375	0.985755	1.00572	0.968341	0.975253
	41.7	0.980995	0.990834	0.971775	0.99673	0.969063	0.9878	0.996996	0.969368	0.971348
	41.8	0.98308	0.992738	0.973669	0.997711	0.964752	0.988823	0.998934	0.966288	0.972324
	41.9	0.982038	0.990834	0.971775	0.998692	0.971219	0.98371	1.01541	0.97553	0.978181
	42	0.985165	0.991786	0.976511	0.999673	0.974453	0.988823	1.01637	0.973476	0.977205
	42.1	0.98308	0.991786	0.972722	0.993787	0.973375	0.990868	1.0125	0.973476	0.976229
	42.2	0.97891	0.987027	0.971775	0.991825	0.967985	0.99189	1.00765	0.97553	0.978181
	42.3	0.97891	0.99369	0.971775	0.990844	0.971219	0.984732	1.01347	0.971422	0.975253
	42.4	0.979953	0.987979	0.969881	0.990844	0.976609	0.990868	1.01541	0.976556	0.980134
	42.5	0.977868	0.991786	0.972722	0.988882	0.971219	0.990868	1.00959	0.970395	0.974276
	42.6	0.982038	0.991786	0.971775	0.985939	0.974453	0.990868	1.01153	0.97553	0.979158
	42.7	0.977868	0.991786	0.967986	0.993787	0.971219	0.997003	1.00378	0.97553	0.977205
	42.8	0.980995	0.992738	0.973669	0.987901	0.975531	0.988823	1.01444	0.976556	0.978181
	42.9	0.980995	0.989882	0.967039	0.994768	0.976609	0.992913	1.00572	0.980664	0.976229
	43	0.980995	0.992738	0.971775	0.991825	0.971219	0.993935	1.01541	0.979637	0.979158
	43.1	0.98308	0.991786	0.968934	0.995749	0.973375	0.992913	1.00765	0.972449	0.976229
	43.2	0.977868	0.987979	0.973669	0.994768	0.967985	0.990868	1.00475	0.972449	0.974276
	43.3	0.976825	0.991786	0.971775	0.994768	0.967985	0.988823	1.01734	0.972449	0.978181
	43.4	0.977868	0.986075	0.971775	1.00164	0.969063	0.98371	1.0125	0.969368	0.974276
	43.5	0.976825	0.984171	0.971775	0.998692	0.966907	0.990868	1.00475	0.968341	0.971348
	43.6	0.982038	0.991786	0.970828	0.997711	0.973375	0.984732	1.01637	0.971422	0.976229
	43.7	0.975783	0.982268	0.971775	0.998692	0.970141	0.990868	1.01347	0.972449	0.976229
	43.8	0.97891	0.98893	0.971775	0.997711	0.971219	0.9878	1.0125	0.972449	0.975253
	43.9	0.985165	0.994641	0.975564	0.997711	0.970141	0.980642	1.01153	0.976556	0.975253
	44	0.97891	0.987027	0.972722	0.990844	0.975531	0.988823	1.01541	0.970395	0.977205
	44.1	0.977868	0.98893	0.967986	0.991825	0.965829	0.994958	1.00184	0.970395	0.969395
	44.2	0.98308	0.997497	0.971775	0.992806	0.965829	0.98371	1.01928	0.965261	0.974276
	44.3	0.979953	0.987979	0.972722	0.999673	0.969063	0.986777	1.01541	0.970395	0.972324
	44.4	0.97891	0.985123	0.975564	0.999673	0.964752	0.985755	1.01444	0.964234	0.9733
	44.5	0.985165	0.98893	0.965145	0.999673	0.965829	0.986777	1.01541	0.968341	0.977205
	44.6	0.979953	0.987979	0.965145	1.00458	0.971219	0.988823	1.01153	0.972449	0.971348
	44.7	0.984123	0.98322	0.966092	1.00458	0.964752	0.986777	1.01734	0.960127	0.972324
	44.8	0.98308	0.98322	0.967986	1.00458	0.967985	0.984732	1.01928	0.965261	0.975253
	44.9	0.98308	0.982268	0.965145	1.00065	0.967985	0.989845	1.01347	0.968341	0.975253
	45	0.982038	0.984171	0.960409	1.00262	0.963674	0.9878	1.01831	0.964234	0.9733
	45.1	0.986208	0.989882	0.966092	1.00262	0.967985	0.986777	1.01444	0.969368	0.969395
	45.2	0.984123	0.992738	0.963251	1.00654	0.963674	0.9878	1.01444	0.968341	0.974276
	45.3	0.982038	0.991786	0.963251	1.00164	0.967985	0.985755	1.00959	0.969368	0.971348
	45.4	0.980995	0.987027	0.957568	1.00164	0.969063	0.984732	1.01056	0.97553	0.972324
	45.5	0.98308	0.99369	0.960409	0.999673	0.965829	0.988823	1.01153	0.971422	0.972324
	45.6	0.984123	0.996545	0.967039	0.994768	0.966907	0.98371	1.00765	0.970395	0.974276
	45.7	0.982038	0.986075	0.961356	0.999673	0.965829	0.988823	1.01153	0.972449	0.969395
	45.8	0.976825	0.98893	0.969881	0.994768	0.966907	0.98371	1.00572	0.966288	0.967443
	45.9	0.98308	0.99369	0.965145	0.99673	0.964752	0.986777	0.998934	0.969368	0.976229
	46	0.979953	0.989882	0.971775	0.997711	0.967985	0.982687	1.01056	0.972449	0.971348
	46.1	0.97474	0.985123	0.968934	0.993787	0.965829	0.99189	1.00959	0.965261	0.969395
	46.2	0.982038	0.990834	0.968934	0.992806	0.964752	0.985755	1.00475	0.960127	0.971348
	46.3	0.980995	0.987979	0.965145	0.998692	0.969063	0.982687	1.0125	0.970395	0.971348
	46.4	0.980995	0.989882	0.958515	0.997711	0.964752	0.988823	1.00184	0.963207	0.969395
	46.5	0.976825	0.987027	0.956621	0.995749	0.962596	0.985755	1.00862	0.966288	0.970371
	46.6	0.977868	0.98893	0.957568	0.999673	0.965829	0.988823	1.00765	0.972449	0.974276
	46.7	0.98308	0.991786	0.961356	0.994768	0.966907	0.989845	1.00959	0.971422	0.972324
	46.8	0.979953	0.992738	0.958515	0.99673	0.966907	0.9878	1.00862	0.97861	0.9733
	46.9	0.975783	0.987027	0.954726	0.99673	0.967985	0.986777	1.00572	0.971422	0.969395
	47	0.979953	0.98893	0.956621	0.998692	0.964752	0.990868	1.01153	0.97553	0.970371
	47.1	0.97891	0.98893	0.958515	0.994768	0.965829	0.9878	1.00765	0.968341	0.972324
	47.2	0.979953	0.98322	0.958515	0.994768	0.962596	0.988823	1.00184	0.961153	0.972324
	47.3	0.975783	0.985123	0.949043	1.00262	0.965829	0.981665	1.00959	0.966288	0.970371
	47.4	0.977868	0.987979	0.959462	0.999673	0.966907	0.985755	1.00475	0.968341	0.968419
	47.5	0.977868	0.987979	0.957568	0.999673	0.966907	0.986777	1.00765	0.972449	0.968419
	47.6	0.979953	0.98893	0.962303	0.995749	0.966907	0.98371	1.01153	0.967315	0.971348
	47.7	0.976825	0.987027	0.953779	0.992806	0.965829	0.98371	1.00765	0.964234	0.971348
	47.8	0.977868	0.986075	0.957568	0.990844	0.966907	0.9878	1.00765	0.968341	0.971348
	47.9	0.977868	0.986075	0.958515	0.992806	0.96044	0.990868	1.00669	0.964234	0.96549
	48	0.980995	0.989882	0.952832	0.997711	0.965829	0.980642	1.01928	0.970395	0.968419
	48.1	0.980995	0.987027	0.957568	0.995749	0.969063	0.986777	1.01444	0.971422	0.9733
	48.2	0.976825	0.987027	0.959462	0.997711	0.967985	0.988823	1.00765	0.963207	0.971348
	48.3	0.97891	0.984171	0.955673	0.997711	0.966907	0.986777	1.01444	0.964234	0.969395
	48.4	0.975783	0.984171	0.958515	0.995749	0.964752	0.982687	1.00765	0.967315	0.970371
	48.5	0.976825	0.984171	0.957568	0.993787	0.969063	0.984732	1.00959	0.971422	0.966467
	48.6	0.973698	0.980364	0.956621	0.997711	0.966907	0.98371	1.01347	0.974503	0.966467
	48.7	0.979953	0.980364	0.955673	0.993787	0.965829	0.989845	1.00862	0.973476	0.969395
	48.8	0.979953	0.985123	0.954726	0.994768	0.969063	0.985755	1.01444	0.971422	0.971348
	48.9	0.975783	0.981316	0.954726	0.998692	0.962596	0.986777	1.01153	0.968341	0.968419
	49	0.97474	0.978461	0.951885	0.990844	0.964752	0.988823	1.01637	0.971422	0.971348
	49.1	0.979953	0.981316	0.956621	0.989863	0.964752	0.98371	1.01056	0.969368	0.971348
	49.2	0.97891	0.980364	0.952832	0.991825	0.965829	0.985755	1.00572	0.974503	0.967443
	49.3	0.980995	0.984171	0.952832	0.987901	0.966907	0.98371	1.01347	0.971422	0.974276
	49.4	0.977868	0.981316	0.952832	0.992806	0.967985	0.986777	1.00475	0.97553	0.974276
	49.5	0.979953	0.980364	0.951885	0.987901	0.967985	0.985755	1.01444	0.969368	0.972324
	49.6	0.977868	0.979412	0.955673	0.993787	0.965829	0.986777	1.01153	0.966288	0.970371
	49.7	0.979953	0.982268	0.948096	0.995749	0.96044	0.9878	1.00669	0.967315	0.96549
	49.8	0.977868	0.979412	0.956621	0.995749	0.969063	0.97962	1.00765	0.976556	0.96549
	49.9	0.977868	0.977509	0.960409	1.00065	0.959362	0.98371	1.01444	0.9591	0.962562
	50	0.977868	0.981316	0.954726	1.00262	0.962596	0.971439	1.00765	0.979637	0.961585
	50.1	0.973698	0.976557	0.959462	0.995749	0.963674	0.976552	1.01153	0.965261	0.967443
	50.2	0.975783	0.978461	0.962303	1.00164	0.961518	0.980642	1.00475	0.963207	0.969395
	50.3	0.97891	0.979412	0.957568	0.998692	0.963674	0.980642	1.00862	0.968341	0.970371
	50.4	0.977868	0.980364	0.959462	0.99673	0.969063	0.981665	1.01444	0.973476	0.972324
	50.5	0.99142	0.986075	0.955673	0.995749	0.967985	0.981665	1.02025	0.967315	0.975253
	50.6	0.997675	0.98893	0.956621	0.999673	0.974453	0.962236	1.02219	0.974503	0.975253
	50.7	0.993505	0.991786	0.958515	0.999673	0.971219	0.98371	1.03091	0.976556	0.985015
	50.8	0.994548	0.990834	0.961356	0.99673	0.976609	0.989845	1.02219	0.97553	0.984039
	50.9	0.998718	0.990834	0.961356	0.997711	0.973375	0.986777	1.02606	0.976556	0.989896
	51	1.00602	0.9994	0.957568	0.998692	0.98631	0.989845	1.03575	0.990933	0.993801
	51.1	1.00706	1.00035	0.954726	0.999673	0.985232	0.985755	1.04544	0.983745	0.995753
	51.2	1.01123	1.00321	0.958515	0.982014	0.990622	0.997003	1.04835	0.986825	1.00063
	51.3	1.01019	1.00892	0.959462	0.997711	0.993856	0.995981	1.03866	0.992986	1.00552
	51.4	1.01227	1.00416	0.961356	1.00065	0.99709	1.00109	1.04738	0.994013	1.00454
	51.5	1.0154	1.00511	0.957568	1.00262	0.999245	1.00416	1.04253	1.00428	1.00844
	51.6	1.01644	1.00797	0.959462	0.997711	1.00032	1.00927	1.05416	1.00017	1.0104
	51.7	1.01853	1.00797	0.953779	1.00654	1.0014	1.00621	1.04447	1.00531	1.00844
	51.8	1.02165	1.01082	0.960409	1.00065	1.00571	1.00621	1.04253	1.00634	1.00942
	51.9	1.02165	1.01177	0.957568	1.0036	1.00248	1.0103	1.04157	1.00634	1.01333
	52	1.01853	1.01273	0.959462	1.0085	1.00356	1.01234	1.04932	1.00223	1.0104
	52.1	1.01644	1.01082	0.964198	1.00654	1.00464	1.01234	1.04932	1.00736	1.01333
	52.2	1.0154	1.01558	0.964198	1.0085	1.00356	1.01439	1.04253	1.00531	1.0104
	52.3	1.01331	1.01368	0.961356	1.01341	1.00248	1.01643	1.0561	1.0012	1.0104
	52.4	1.01331	1.01558	0.965145	1.02027	1.00356	1.00927	1.05222	1.00223	1.01137
	52.5	1.00914	1.01273	0.976511	1.0242	1.00679	1.01439	1.05319	1.00839	1.01235
	52.6	1.00914	1.01748	0.973669	1.02518	0.998168	1.01234	1.05319	0.999148	1.0104
	52.7	1.0081	1.01463	0.977458	1.02714	1.00571	1.02052	1.04738	1.01044	1.01235
	52.8	1.0081	1.01653	0.978405	1.02812	1.00248	1.01643	1.05513	1.00223	1.00649
	52.9	1.00706	1.01463	0.978405	1.03793	1.00248	1.02257	1.04932	1.00428	1.00844
	53	1.01019	1.02224	0.986929	1.0399	1.00356	1.01439	1.05319	1.00839	1.0143
	53.1	1.00497	1.01463	0.987876	1.04186	1.00032	1.0195	1.04738	1.00223	1.00942
	53.2	1.00289	1.01939	0.992612	1.04578	1.00032	1.01643	1.05804	1.00634	1.00844
	53.3	1.00393	1.01748	0.994507	1.04971	1.00571	1.01439	1.05416	1.00634	1.01137
	53.4	1.00185	1.01558	0.994507	1.0448	1.00787	1.01643	1.05707	1.00839	1.01918
	53.5	0.99559	1.01844	0.994507	1.04676	1.00464	1.01643	1.04835	0.999148	1.01235
	53.6	0.99559	1.01844	0.998295	1.04186	1.00679	1.01643	1.05222	1.00531	1.01235
	53.7	0.997675	1.01463	0.996401	1.04676	1.00571	1.01439	1.04932	1.00428	1.01333
	53.8	0.992463	1.00892	1.00114	1.04676	1.00248	1.02154	1.05319	1.00017	1.0143
	53.9	0.993505	1.01653	1.00587	1.04676	1.00571	1.01541	1.05125	1.00634	1.0143
	54	0.996633	1.01558	1.00303	1.04578	1.00248	1.01439	1.06385	1.0012	1.01625
	54.1	0.993505	1.01939	1.00398	1.04774	1.00356	1.02154	1.05125	1.00736	1.01235
	54.2	0.99142	1.01748	1.00208	1.04872	1.00248	1.01439	1.05222	1.00634	1.01235
	54.3	0.993505	1.01653	0.999242	1.04578	1.00356	1.01745	1.05707	1.00223	1.0143
	54.4	0.99559	1.0232	0.997348	1.0448	1.00356	1.01541	1.0561	1.00326	1.01235
	54.5	0.99559	1.01463	0.995454	1.04382	1.00356	1.01541	1.06579	1.01147	1.01625
	54.6	0.994548	1.01939	1.00019	1.04382	1.00464	1.0195	1.05416	1.00736	1.01625
	54.7	0.992463	1.02224	0.997348	1.04382	0.998168	1.01643	1.04544	1.0012	1.01235
	54.8	0.99559	1.01939	0.995454	1.04872	1.0014	1.02154	1.05319	1.00326	1.01333
	54.9	0.993505	1.01748	1.00019	1.04971	1.00032	1.01439	1.05901	1.00634	1.01528
	55	0.988293	1.01368	0.997348	1.04382	1.00032	1.01439	1.05804	1.00736	1.01137
	55.1	0.98725	1.01558	0.999242	1.04284	1.00571	1.01541	1.05901	1.00942	1.01723
	55.2	0.993505	1.01748	0.999242	1.04088	1.0014	1.01848	1.06482	1.00428	1.0143
	55.3	0.992463	1.01748	0.998295	1.04088	1.00571	1.02257	1.0561	1.00839	1.01723
	55.4	0.988293	1.01844	0.999242	1.04676	1.00571	1.0195	1.05997	1.01147	1.01235
	55.5	0.993505	1.0232	0.998295	1.0448	1.0014	1.02052	1.05997	1.00634	1.01235
	55.6	0.992463	1.01463	0.998295	1.04186	1.00679	1.01745	1.05804	1.00326	1.01333
	55.7	0.993505	1.01748	0.996401	1.04382	1.00356	1.01643	1.06385	1.00736	1.01625
	55.8	0.992463	1.01748	1.00114	1.04284	1.00248	1.0195	1.06288	1.00634	1.01723
	55.9	0.99142	1.01653	0.997348	1.04284	1.00464	1.02359	1.06191	1.00942	1.02016
	56	0.993505	1.01653	0.997348	1.04676	1.00248	1.01745	1.0561	1.00326	1.01918
	56.1	0.997675	1.01748	0.996401	1.04578	1.00032	1.01848	1.05416	1.00531	1.01528
	56.2	0.992463	1.01463	0.995454	1.0448	1.00248	1.01439	1.05513	1.00223	1.01528
	56.3	0.998718	1.02129	0.995454	1.04284	0.999245	1.01439	1.06869	1.00223	1.0104
	56.4	1.0008	1.02129	0.995454	1.04186	1.00248	1.01541	1.06191	1.00736	1.02114
	56.5	0.998718	1.01844	0.995454	1.03695	1.00356	1.01336	1.06579	1.01147	1.01333
	56.6	1.00185	1.01748	0.997348	1.03303	1.00356	1.01541	1.06094	1.00942	1.01723
	56.7	1.00185	1.01748	0.992612	1.03401	1.00032	1.01541	1.06094	1.01147	1.01821
	56.8	0.998718	1.01748	0.997348	1.03597	1.00356	1.01745	1.05513	1.0012	1.01723
	56.9	0.997675	1.01368	0.996401	1.03499	1.00679	1.01234	1.05997	1.01044	1.01528
	57	0.997675	1.01558	0.996401	1.03499	1.00248	1.02052	1.05901	1.00326	1.01723
	57.1	0.99559	1.01273	0.998295	1.03793	0.999245	1.0195	1.0561	1.00634	1.01625
	57.2	0.996633	1.01273	1.00019	1.03793	0.998168	1.01643	1.06094	1.00223	1.01528
	57.3	0.997675	1.02034	1.00019	1.0399	1.00248	1.01439	1.06191	1.00326	1.01918
	57.4	0.998718	1.01653	0.993559	1.04284	1.00248	1.01439	1.05707	1.0012	1.01625
	57.5	0.99976	1.01844	0.997348	1.03793	0.999245	1.01541	1.05222	1.00736	1.01625
	57.6	0.99976	1.01558	0.992612	1.0399	1.00679	1.01643	1.05997	1.00634	1.0143
	57.7	0.993505	1.01748	0.991665	1.03695	1.00356	1.01643	1.05513	1.00223	1.01723
	57.8	0.996633	1.0232	0.992612	1.03891	0.994934	1.01643	1.06094	1.00428	1.01235
	57.9	0.998718	1.01939	0.994507	1.03793	1.00032	1.01643	1.06191	0.999148	1.01723
	58	0.992463	1.01558	0.991665	1.04186	1.00032	1.01234	1.05804	1.00326	1.01625
	58.1	0.990378	1.01177	0.992612	1.04284	0.999245	1.01336	1.06579	1.00428	1.01821
	58.2	0.992463	1.01273	0.995454	1.03793	0.999245	1.01336	1.06869	1.00223	1.01528
	58.3	0.994548	1.01463	0.992612	1.03695	1.00032	1.01643	1.0561	1.00428	1.01821
	58.4	0.997675	1.01653	0.995454	1.04578	1.0014	1.01234	1.05997	1.00017	1.02211
	58.5	0.99559	1.02034	0.995454	1.03793	1.00248	1.01541	1.05707	1.00326	1.02016
	58.6	0.99559	1.01558	0.991665	1.03597	0.999245	1.01643	1.06191	0.999148	1.01625
	58.7	0.994548	1.02224	0.990718	1.03891	1.0014	1.01745	1.05416	1.00017	1.01723
	58.8	0.997675	1.02129	0.992612	1.03891	0.993856	1.01745	1.06288	0.987852	1.01723
	58.9	0.99559	1.02129	0.989771	1.03891	0.996012	1.01132	1.0561	0.999148	1.01821
	59	0.993505	1.01939	0.989771	1.03401	0.993856	1.01439	1.05513	0.99504	1.01821
	59.1	0.997675	1.01939	0.988824	1.04088	0.996012	1.01643	1.05804	1.00017	1.01625
	59.2	0.992463	1.01368	0.996401	1.04088	0.994934	1.01234	1.05804	1.0012	1.0143
	59.3	0.99142	1.01558	0.991665	1.0399	0.998168	1.01643	1.05901	0.997094	1.01235
	59.4	0.994548	1.01082	0.990718	1.03597	0.99709	1.01439	1.05707	1.00017	1.01235
	59.5	0.99976	1.01558	0.992612	1.04186	0.998168	1.0103	1.05804	0.999148	1.01235
	59.6	0.994548	1.01273	0.993559	1.03793	0.999245	1.01336	1.05513	1.00326	1.01333
	59.7	0.993505	1.00987	0.990718	1.03597	0.999245	1.01643	1.05319	1.00428	1.01625
	59.8	0.994548	1.01558	0.990718	1.04088	0.996012	1.01541	1.04544	1.00428	1.01235
	59.9	0.996633	1.01653	0.993559	1.03303	0.994934	1.01439	1.04738	0.994013	1.01528
	60	0.993505	1.01463	0.987876	1.04088	0.992778	1.01132	1.04932	0.998121	1.01821
[truncated: 3 more columns]
