# Supplementary material for: FRET kinase sensor development reveals SnRK2/OST1 activation by ABA but not by MeJA and high CO2 during stomatal closure
Source: eLife. 2020 May 28;9:e56351. doi: 10.7554/eLife.56351 (PMC7289597; doi:10.7554/eLife.56351)
Supplement: Figure 9—figure supplement 1—source data 1. [file elife-56351-fig9-figsupp1-data1.xlsx]

## Sheet: Figure 9-figure supplement 1
Figure S9
Genotype	Average. Absolute change in stomatal conductance, mmol m-2 s-1	Average Relative change in stomatal conductance, %	abs error	rel error
Col-0	68.8269	48.4357	2.77495	1.80847
pyl 11458	98.9537	30.2032	10.8783	4.20196
pyl 12458	164.967	38.7149	17.8687	2.25817
pyl 112458	210.712	27.9926	39.3014	5.0555
Line	gs0-gs20	(gs0-gs20)/gs0
Col	72.116	0.502612
Col	69.3765	0.47291
Col	71.6669	0.508089
Col	72.8582	0.480153
Col	78.0702	0.412295
Col	57.5317	0.564022
Col	60.1691	0.45042
p12458	229.268	0.444319
p12458	153.207	0.335903
p12458	158.836	0.365023
p12458	119.42	0.352336
p12458	164.103	0.438165
p11458	112.084	0.342742
p11458	123.238	0.287985
p11458	107.44	0.31475
p11458	57.2667	0.172261
p11458	74.67	0.24885
p11458	80.6416	0.228618
p11458	137.335	0.519017
p112458	326.953	0.383718
p112458	263.738	0.411911
p112458	166.889	0.200168
p112458	196.876	0.248774
p112458	99.1029	0.155061
