# Supplementary material for: FRET kinase sensor development reveals SnRK2/OST1 activation by ABA but not by MeJA and high CO2 during stomatal closure
Source: eLife. 2020 May 28;9:e56351. doi: 10.7554/eLife.56351 (PMC7289597; doi:10.7554/eLife.56351)
Supplement: Figure 9—figure supplement 2—source data 1. [file elife-56351-fig9-figsupp2-data1.xlsx]

## Sheet: Sheet1
		WT							11458							11458/PYL1							11458/PYL4								11458/PYL5
Condition	Time	Plant 1	Plant 2	Plant 3	Plant 4		Condition	Time	Plant 1	Plant 2	Plant 3	Plant 4		Condition	Time	Plant 1	Plant 2	Plant 3	Plant 4		Condition	Time	Plant 1	Plant 2	Plant 3	Plant 4	Plant 5		Condition	Time	Plant 1	Plant 2	Plant 3	Plant 4
dark	0	0.0959	0.0754	0.0503	0.0346		dark	0	0.1474	0.0997	0.0546	0.0862		dark	0	0.0714	0.0866	0.0614	0.0744		dark	0	0.0926	0.0715	0.0521	0.1082	0.0873		dark	0	0.0413	0.0475	0.042	0.0497
	0.5	0.0954	0.0759	0.0501	0.0344			0.5	0.1465	0.099	0.055	0.0855			0.5	0.0729	0.0865	0.0618	0.0741			0.5	0.0928	0.0725	0.0517	0.107	0.0862			0.5	0.0412	0.0466	0.0418	0.0501
	1	0.0952	0.0763	0.0501	0.0345			1	0.1456	0.0995	0.0568	0.0861			1	0.0708	0.0867	0.0616	0.0741			1	0.0943	0.0728	0.0528	0.1054	0.0865			1	0.042	0.0467	0.0421	0.0498
	1.5	0.0954	0.0765	0.0495	0.0347			1.5	0.1451	0.0993	0.0563	0.0865			1.5	0.0707	0.0874	0.0613	0.0727			1.5	0.0938	0.0734	0.0526	0.1059	0.0865			1.5	0.0418	0.0459	0.0427	0.0498
	2	0.0946	0.077	0.0483	0.0347			2	0.1464	0.0997	0.056	0.0878			2	0.0702	0.0872	0.0615	0.0733			2	0.0935	0.0738	0.0533	0.1057	0.0862			2	0.0419	0.046	0.0431	0.0501
	2.5	0.0955	0.077	0.0481	0.0348			2.5	0.1461	0.0999	0.0558	0.0874			2.5	0.0703	0.0869	0.0615	0.0728			2.5	0.094	0.0742	0.0533	0.1056	0.0868			2.5	0.0421	0.0461	0.043	0.0504
	3	0.0943	0.0772	0.0485	0.0347			3	0.1455	0.1	0.0561	0.0898			3	0.0688	0.0876	0.0614	0.0723			3	0.0957	0.0746	0.0528	0.1053	0.0859			3	0.0419	0.046	0.0433	0.0501
	3.5	0.0942	0.0773	0.0491	0.0345			3.5	0.1471	0.0995	0.0559	0.0901			3.5	0.069	0.0874	0.0613	0.0722			3.5	0.0953	0.0744	0.053	0.1068	0.0851			3.5	0.0422	0.0459	0.0427	0.05
	4	0.0941	0.0772	0.0496	0.0343			4	0.148	0.0993	0.0562	0.0905			4	0.0681	0.0877	0.0614	0.0718			4	0.096	0.0744	0.0535	0.1067	0.0849			4	0.0418	0.0452	0.0429	0.05
	4.5	0.094	0.0769	0.0503	0.0351			4.5	0.1504	0.0991	0.0569	0.0895			4.5	0.0698	0.0888	0.0618	0.0719			4.5	0.0936	0.0744	0.053	0.1075	0.0848			4.5	0.0422	0.0455	0.0431	0.0494
	5	0.094	0.0777	0.0521	0.0352			5	0.1507	0.0996	0.0561	0.0914			5	0.0711	0.0896	0.0613	0.0716			5	0.0939	0.0742	0.0519	0.1075	0.0841			5	0.0423	0.0454	0.0429	0.0499
	5.5	0.0938	0.0773	0.0528	0.0352			5.5	0.1514	0.0994	0.0575	0.0918			5.5	0.0715	0.09	0.0616	0.0711			5.5	0.0938	0.0742	0.0522	0.1072	0.0837			5.5	0.0414	0.0452	0.0433	0.05
	6	0.0926	0.0772	0.053	0.0355			6	0.1516	0.0995	0.0584	0.0916			6	0.0731	0.0905	0.0615	0.0714			6	0.0944	0.0743	0.0524	0.1071	0.084			6	0.0421	0.0452	0.0435	0.0501
	6.5	0.0916	0.077	0.053	0.0355			6.5	0.1517	0.099	0.0587	0.0913			6.5	0.0732	0.0908	0.0618	0.0719			6.5	0.0949	0.0742	0.0528	0.1063	0.0834			6.5	0.0417	0.0448	0.0433	0.0499
	7	0.0914	0.0771	0.0528	0.0356			7	0.1521	0.0992	0.0593	0.0922			7	0.0733	0.0911	0.0619	0.0717			7	0.0955	0.074	0.0527	0.1064	0.0833			7	0.042	0.045	0.0433	0.0496
	7.5	0.0915	0.0771	0.0529	0.0362			7.5	0.1526	0.0988	0.0596	0.0917			7.5	0.0738	0.0916	0.0621	0.0721			7.5	0.0956	0.074	0.0527	0.1058	0.0821			7.5	0.042	0.045	0.0434	0.05
	8	0.0904	0.0771	0.0527	0.036			8	0.1527	0.0984	0.0599	0.0935			8	0.0744	0.0913	0.062	0.0726			8	0.0963	0.0743	0.0522	0.1048	0.0825			8	0.0416	0.0454	0.0434	0.0501
	8.5	0.0907	0.077	0.0527	0.0357			8.5	0.1532	0.0993	0.0607	0.0918			8.5	0.0746	0.0915	0.0622	0.0717			8.5	0.0961	0.0745	0.0524	0.1047	0.0826			8.5	0.0422	0.046	0.0436	0.0503
	9	0.0901	0.077	0.0529	0.0362			9	0.1527	0.0981	0.0608	0.0923			9	0.0749	0.0915	0.0627	0.0717			9	0.097	0.0746	0.0523	0.1044	0.083			9	0.0418	0.0464	0.0438	0.0502
	9.5	0.0899	0.0769	0.0529	0.0362			9.5	0.1524	0.0982	0.0608	0.0927			9.5	0.0743	0.0914	0.0623	0.072			9.5	0.097	0.0747	0.0519	0.1034	0.083			9.5	0.0417	0.0468	0.0437	0.0498
light-on	10	0.0909	0.0786	0.0539	0.0366		light-on	10	0.1542	0.101	0.062	0.0944		light-on	10	0.0751	0.0938	0.0642	0.0728		light-on	10	0.0988	0.0755	0.053	0.1055	0.0837		light-on	10	0.0432	0.048	0.0448	0.052
	10.5	0.0917	0.0785	0.0535	0.0373			10.5	0.1553	0.1019	0.0618	0.095			10.5	0.076	0.0941	0.0651	0.0748			10.5	0.1004	0.0759	0.0542	0.106	0.0846			10.5	0.0437	0.0478	0.0461	0.0525
	11	0.0917	0.0787	0.0538	0.0378			11	0.155	0.1026	0.0624	0.0945			11	0.0754	0.0943	0.0652	0.0762			11	0.1007	0.0751	0.0545	0.1057	0.084			11	0.0437	0.048	0.0464	0.053
	11.5	0.0918	0.0788	0.054	0.0381			11.5	0.155	0.1028	0.0625	0.0956			11.5	0.0758	0.0944	0.0654	0.0755			11.5	0.1008	0.0755	0.0551	0.1066	0.0838			11.5	0.0442	0.0484	0.047	0.0531
	12	0.0929	0.0791	0.0544	0.0388			12	0.1557	0.1032	0.0627	0.0953			12	0.0755	0.095	0.0657	0.0756			12	0.1008	0.0759	0.0559	0.1077	0.0844			12	0.0449	0.0484	0.0477	0.0538
	12.5	0.0932	0.0801	0.0535	0.0396			12.5	0.1548	0.1027	0.0638	0.096			12.5	0.076	0.0958	0.0661	0.0753			12.5	0.1015	0.0765	0.0563	0.109	0.085			12.5	0.0453	0.0492	0.0484	0.0502
	13	0.0922	0.0812	0.0541	0.0406			13	0.1552	0.1026	0.0652	0.0967			13	0.0764	0.0959	0.0671	0.0752			13	0.1013	0.0766	0.0568	0.1099	0.0854			13	0.0465	0.0503	0.0485	0.0533
	13.5	0.0952	0.0826	0.0552	0.0411			13.5	0.1559	0.1028	0.0665	0.0978			13.5	0.0763	0.0965	0.0676	0.0754			13.5	0.1018	0.0784	0.0576	0.1111	0.0866			13.5	0.0474	0.0515	0.0495	0.0548
	14	0.0969	0.0838	0.0566	0.0425			14	0.1562	0.1016	0.0678	0.098			14	0.0764	0.0975	0.0685	0.0759			14	0.1025	0.0795	0.0584	0.1128	0.0885			14	0.0482	0.053	0.0501	0.0552
	14.5	0.0987	0.0854	0.058	0.0437			14.5	0.1564	0.1021	0.0695	0.0984			14.5	0.0768	0.098	0.0692	0.0757			14.5	0.1026	0.0816	0.0595	0.1141	0.0888			14.5	0.0493	0.0541	0.0501	0.0564
	15	0.1004	0.0871	0.0594	0.0447			15	0.156	0.1027	0.0715	0.0995			15	0.0769	0.099	0.0708	0.0755			15	0.1034	0.083	0.0602	0.1156	0.09			15	0.0499	0.0552	0.0503	0.0576
	15.5	0.1017	0.0885	0.0607	0.0458			15.5	0.1573	0.1037	0.0734	0.101			15.5	0.0771	0.0991	0.0713	0.0758			15.5	0.1044	0.0842	0.0608	0.1186	0.0915			15.5	0.0506	0.0568	0.0505	0.0589
	16	0.1039	0.0902	0.0618	0.0465			16	0.1583	0.1055	0.0747	0.1009			16	0.0772	0.1014	0.0721	0.0755			16	0.1052	0.0854	0.0614	0.1198	0.0925			16	0.0519	0.0579	0.0505	0.0594
	16.5	0.1059	0.0924	0.0629	0.0478			16.5	0.1596	0.1061	0.0759	0.1032			16.5	0.0771	0.1016	0.0726	0.0763			16.5	0.1058	0.0866	0.0619	0.1221	0.0935			16.5	0.0523	0.0588	0.0508	0.0608
	17	0.1071	0.094	0.0643	0.0479			17	0.1606	0.1071	0.0771	0.1034			17	0.0773	0.103	0.0739	0.0767			17	0.1057	0.0875	0.063	0.1247	0.0952			17	0.0529	0.0599	0.0508	0.0613
	17.5	0.1091	0.0955	0.0658	0.0495			17.5	0.1607	0.1079	0.0788	0.1049			17.5	0.0797	0.1045	0.0746	0.0773			17.5	0.1061	0.0887	0.0635	0.1274	0.0967			17.5	0.0537	0.0614	0.0507	0.0621
	18	0.1115	0.0975	0.0666	0.0507			18	0.1609	0.1093	0.0801	0.1051			18	0.0793	0.1066	0.0757	0.0773			18	0.1067	0.0895	0.0642	0.1296	0.0983			18	0.0547	0.0628	0.0507	0.0628
	18.5	0.1131	0.0987	0.0682	0.0523			18.5	0.1624	0.1095	0.0817	0.1069			18.5	0.0781	0.1076	0.0768	0.0774			18.5	0.1075	0.0903	0.0633	0.1318	0.0991			18.5	0.0551	0.0638	0.051	0.0637
	19	0.1156	0.1004	0.0696	0.0531			19	0.1632	0.1102	0.0832	0.1073			19	0.0797	0.109	0.0776	0.0779			19	0.1083	0.0911	0.0632	0.1342	0.101			19	0.0561	0.0651	0.0507	0.0645
	19.5	0.1171	0.102	0.0728	0.0545			19.5	0.164	0.1118	0.0849	0.1084			19.5	0.0795	0.1104	0.0791	0.0788			19.5	0.1091	0.0917	0.0641	0.1363	0.1029			19.5	0.0568	0.0665	0.0509	0.0655
	20	0.1199	0.1036	0.0739	0.0556			20	0.1675	0.1128	0.0864	0.1094			20	0.0785	0.1122	0.0798	0.0793			20	0.1103	0.0923	0.0651	0.1388	0.1043			20	0.0575	0.0674	0.0514	0.0664
	20.5	0.1222	0.105	0.0756	0.0572			20.5	0.1648	0.1126	0.0879	0.1104			20.5	0.0771	0.1144	0.0812	0.0794			20.5	0.1105	0.0925	0.0675	0.1417	0.1072			20.5	0.0588	0.0691	0.0514	0.0651
	21	0.124	0.1064	0.0766	0.0584			21	0.1668	0.114	0.0887	0.1114			21	0.0798	0.1162	0.0815	0.0804			21	0.1116	0.0931	0.0687	0.1441	0.1085			21	0.0599	0.0703	0.0513	0.0659
	21.5	0.1263	0.1081	0.0779	0.0604			21.5	0.1671	0.1151	0.0909	0.1119			21.5	0.0812	0.1173	0.0832	0.0808			21.5	0.1128	0.0934	0.0698	0.1471	0.1113			21.5	0.0607	0.0719	0.052	0.067
	22	0.1285	0.1096	0.0796	0.0618			22	0.1684	0.116	0.0921	0.1126			22	0.081	0.1199	0.0838	0.082			22	0.1133	0.094	0.0709	0.149	0.113			22	0.0612	0.073	0.0522	0.0678
	22.5	0.13	0.1111	0.0811	0.0632			22.5	0.1705	0.1176	0.0932	0.1131			22.5	0.0812	0.122	0.085	0.0817			22.5	0.1136	0.094	0.0711	0.1514	0.1149			22.5	0.0621	0.0747	0.0522	0.069
	23	0.1318	0.1126	0.0824	0.0652			23	0.1706	0.1184	0.095	0.1133			23	0.082	0.1245	0.0866	0.0826			23	0.1147	0.0944	0.0719	0.1533	0.1164			23	0.063	0.0761	0.0526	0.0699
	23.5	0.1338	0.1139	0.0833	0.0669			23.5	0.1723	0.1183	0.0972	0.1137			23.5	0.0839	0.1268	0.0874	0.0844			23.5	0.1155	0.0949	0.0731	0.155	0.1194			23.5	0.0638	0.0774	0.0525	0.0709
	24	0.1353	0.115	0.0847	0.069			24	0.1741	0.1193	0.0986	0.1132			24	0.0837	0.1288	0.0885	0.0845			24	0.1165	0.0955	0.0746	0.1566	0.1221			24	0.0649	0.079	0.0532	0.0721
	24.5	0.1367	0.1162	0.0866	0.0708			24.5	0.1734	0.1209	0.1002	0.114			24.5	0.0849	0.1302	0.0901	0.085			24.5	0.1169	0.0959	0.0755	0.1581	0.1238			24.5	0.0657	0.0807	0.0533	0.0752
	25	0.1381	0.1175	0.0874	0.0723			25	0.1752	0.123	0.102	0.1138			25	0.0851	0.1317	0.0907	0.0867			25	0.1169	0.0961	0.077	0.1598	0.1275			25	0.0667	0.0825	0.0536	0.077
	25.5	0.1402	0.1185	0.0889	0.0744			25.5	0.1764	0.1245	0.1032	0.1127			25.5	0.0863	0.1347	0.0929	0.0871			25.5	0.1173	0.0963	0.0782	0.1607	0.1282			25.5	0.0676	0.0844	0.0536	0.0778
	26	0.1414	0.1193	0.0897	0.0756			26	0.1782	0.1263	0.1056	0.1125			26	0.0866	0.1359	0.0943	0.0878			26	0.1179	0.0969	0.079	0.1604	0.1307			26	0.0688	0.0862	0.0542	0.0796
	26.5	0.1424	0.1202	0.0909	0.078			26.5	0.18	0.128	0.1071	0.1127			26.5	0.087	0.1383	0.0956	0.0883			26.5	0.1186	0.0974	0.0801	0.1614	0.1327			26.5	0.07	0.088	0.0548	0.0803
	27	0.1435	0.1212	0.0922	0.0798			27	0.1817	0.1287	0.1091	0.1116			27	0.0878	0.1387	0.0968	0.0887			27	0.1184	0.0974	0.0814	0.1614	0.1347			27	0.0711	0.0899	0.0549	0.0813
	27.5	0.1448	0.1222	0.0935	0.0818			27.5	0.1839	0.1312	0.1103	0.1114			27.5	0.0886	0.1392	0.0985	0.0887			27.5	0.1185	0.0981	0.0823	0.1614	0.1369			27.5	0.0722	0.0916	0.0554	0.082
	28	0.1465	0.1229	0.0944	0.083			28	0.1816	0.1333	0.1134	0.1105			28	0.0903	0.1406	0.0998	0.0894			28	0.1196	0.099	0.0834	0.162	0.138			28	0.0732	0.0941	0.0554	0.0834
	28.5	0.1474	0.1235	0.0952	0.085			28.5	0.1821	0.1352	0.1149	0.1106			28.5	0.0895	0.1412	0.1009	0.0896			28.5	0.1195	0.0993	0.0844	0.1612	0.1412			28.5	0.075	0.0956	0.0563	0.0846
	29	0.1483	0.1237	0.0958	0.087			29	0.1825	0.1369	0.1165	0.1099			29	0.0903	0.1419	0.1022	0.0899			29	0.1197	0.0996	0.0857	0.1604	0.1412			29	0.076	0.0974	0.0567	0.0856
	29.5	0.1488	0.1245	0.0971	0.0886			29.5	0.1823	0.1379	0.1181	0.1097			29.5	0.0909	0.1417	0.1035	0.0905			29.5	0.1195	0.1005	0.0869	0.1597	0.1436			29.5	0.0765	0.0992	0.0571	0.0868
	30	0.1487	0.1251	0.0979	0.0904			30	0.1825	0.14	0.1209	0.1093			30	0.0911	0.1421	0.1049	0.0896			30	0.1189	0.1007	0.088	0.1586	0.1445			30	0.0784	0.1012	0.0574	0.0873
	30.5	0.1494	0.1252	0.0983	0.0922			30.5	0.1826	0.1413	0.1233	0.1086			30.5	0.0929	0.1424	0.1065	0.0901			30.5	0.119	0.1011	0.0892	0.158	0.1459			30.5	0.0797	0.1038	0.0582	0.0895
	31	0.1503	0.1259	0.0991	0.0937			31	0.1825	0.1435	0.1253	0.1084			31	0.0933	0.143	0.1074	0.09			31	0.1191	0.1015	0.0899	0.1566	0.1472			31	0.0809	0.1052	0.0586	0.0903
	31.5	0.1506	0.1264	0.0996	0.0947			31.5	0.1816	0.1452	0.1282	0.107			31.5	0.0944	0.143	0.1088	0.0911			31.5	0.1189	0.1023	0.0912	0.1557	0.1485			31.5	0.0816	0.1073	0.0592	0.0916
	32	0.1518	0.1268	0.101	0.0964			32	0.1824	0.1473	0.1303	0.1071			32	0.0954	0.1419	0.11	0.0907			32	0.118	0.1033	0.0921	0.1547	0.1494			32	0.0832	0.1093	0.0594	0.0926
	32.5	0.1521	0.1272	0.1015	0.0975			32.5	0.1826	0.1484	0.1325	0.1072			32.5	0.0964	0.1422	0.111	0.0908			32.5	0.1186	0.1036	0.0933	0.1535	0.151			32.5	0.0845	0.1108	0.06	0.0941
	33	0.1528	0.128	0.1021	0.0993			33	0.1823	0.1512	0.1344	0.1075			33	0.0968	0.1419	0.1124	0.0911			33	0.1179	0.1039	0.0938	0.1523	0.1511			33	0.0859	0.1128	0.0603	0.0953
	33.5	0.1527	0.1284	0.103	0.1003			33.5	0.1839	0.1532	0.1365	0.1068			33.5	0.0989	0.1405	0.1135	0.0911			33.5	0.1185	0.1042	0.0945	0.1516	0.1508			33.5	0.0873	0.1138	0.0609	0.0966
	34	0.153	0.1286	0.1035	0.1016			34	0.1827	0.155	0.1386	0.1064			34	0.099	0.1406	0.1149	0.0913			34	0.1179	0.1045	0.096	0.1514	0.1509			34	0.0887	0.1154	0.0611	0.0979
	34.5	0.153	0.1288	0.1039	0.1021			34.5	0.1825	0.1562	0.1381	0.1062			34.5	0.0994	0.1396	0.1157	0.0916			34.5	0.1173	0.1051	0.0967	0.1511	0.1502			34.5	0.0897	0.1167	0.0616	0.0984
	35	0.1534	0.1294	0.1047	0.1029			35	0.1818	0.1579	0.1404	0.1061			35	0.1017	0.1388	0.1166	0.0911			35	0.118	0.1046	0.0978	0.1502	0.1497			35	0.0918	0.1182	0.0622	0.1003
	35.5	0.1534	0.1298	0.1048	0.1042			35.5	0.1817	0.159	0.1435	0.1063			35.5	0.1026	0.1392	0.1175	0.0905			35.5	0.1175	0.1063	0.0989	0.1495	0.1493			35.5	0.0925	0.1191	0.0628	0.101
	36	0.1536	0.1304	0.1053	0.1045			36	0.1858	0.1602	0.1472	0.1057			36	0.1032	0.1397	0.1181	0.0895			36	0.1174	0.1069	0.1001	0.1504	0.1498			36	0.0938	0.12	0.0637	0.1029
	36.5	0.1534	0.131	0.1056	0.1048			36.5	0.1806	0.161	0.1498	0.106			36.5	0.1042	0.1396	0.1187	0.0902			36.5	0.1166	0.107	0.1009	0.1502	0.1501			36.5	0.0951	0.121	0.0638	0.1037
	37	0.1541	0.1313	0.106	0.1053			37	0.1811	0.1617	0.1516	0.1054			37	0.1055	0.1403	0.1189	0.0905			37	0.1163	0.1074	0.1016	0.1497	0.1494			37	0.0969	0.1225	0.0644	0.104
	37.5	0.1541	0.1317	0.106	0.1061			37.5	0.1825	0.1632	0.1538	0.1054			37.5	0.1066	0.1402	0.1192	0.0914			37.5	0.1168	0.1085	0.1028	0.1505	0.1501			37.5	0.0978	0.1235	0.0648	0.1054
	38	0.1554	0.1323	0.1066	0.1065			38	0.1827	0.1632	0.1557	0.1051			38	0.1063	0.1411	0.1204	0.0917			38	0.1165	0.1096	0.1037	0.1506	0.1505			38	0.0992	0.1241	0.0655	0.1072
	38.5	0.1547	0.1325	0.1067	0.1067			38.5	0.1849	0.1646	0.1573	0.1045			38.5	0.1064	0.1406	0.1206	0.0915			38.5	0.1163	0.1093	0.1048	0.1509	0.1501			38.5	0.1006	0.1248	0.0659	0.1083
	39	0.1554	0.1329	0.1075	0.1066			39	0.1826	0.1663	0.1593	0.1047			39	0.1065	0.1408	0.1202	0.0921			39	0.1161	0.1093	0.1055	0.1512	0.1496			39	0.1019	0.1253	0.0666	0.1094
	39.5	0.1556	0.1338	0.1073	0.1069			39.5	0.1825	0.1658	0.1609	0.1043			39.5	0.1078	0.1421	0.1203	0.092			39.5	0.1162	0.11	0.1067	0.1526	0.1495			39.5	0.103	0.1272	0.0672	0.1107
	40	0.1559	0.1333	0.108	0.107			40	0.1828	0.1659	0.1618	0.1051			40	0.1083	0.1427	0.1212	0.0915			40	0.1156	0.11	0.1077	0.1551	0.1501			40	0.1051	0.1276	0.0682	0.1116
	40.5	0.1567	0.1339	0.1079	0.1064			40.5	0.1823	0.1662	0.1627	0.1046			40.5	0.1098	0.1434	0.1217	0.0926			40.5	0.116	0.1107	0.1084	0.1552	0.1502			40.5	0.1065	0.128	0.0683	0.1131
	41	0.1575	0.1341	0.1084	0.107			41	0.1824	0.1671	0.1634	0.1056			41	0.1103	0.144	0.1219	0.092			41	0.116	0.1108	0.1096	0.1559	0.15			41	0.1073	0.1285	0.0693	0.1137
	41.5	0.1577	0.1347	0.1084	0.1066			41.5	0.1831	0.1672	0.1649	0.1053			41.5	0.1094	0.1447	0.1221	0.0924			41.5	0.1158	0.1108	0.1098	0.1572	0.1504			41.5	0.1089	0.1288	0.0699	0.1149
	42	0.1582	0.1351	0.1088	0.1063			42	0.1836	0.1668	0.1655	0.1046			42	0.1121	0.1452	0.1223	0.0922			42	0.1163	0.1113	0.1108	0.1572	0.1513			42	0.11	0.1289	0.0707	0.1159
	42.5	0.159	0.1358	0.1094	0.1063			42.5	0.1825	0.1673	0.1676	0.105			42.5	0.1105	0.1445	0.1224	0.092			42.5	0.1163	0.1114	0.1115	0.1582	0.1518			42.5	0.1105	0.131	0.0715	0.1168
	43	0.1588	0.136	0.1096	0.106			43	0.1827	0.1675	0.1682	0.1047			43	0.1122	0.1472	0.1228	0.0929			43	0.1165	0.1112	0.1127	0.1579	0.1515			43	0.1125	0.1303	0.072	0.1178
	43.5	0.1601	0.1368	0.11	0.1057			43.5	0.1831	0.1658	0.1681	0.1052			43.5	0.1136	0.1478	0.1228	0.0926			43.5	0.1161	0.111	0.1129	0.1595	0.1524			43.5	0.1137	0.1292	0.0726	0.1193
	44	0.1604	0.1368	0.11	0.1058			44	0.1821	0.1664	0.1695	0.1055			44	0.1118	0.1498	0.1227	0.0927			44	0.1153	0.1116	0.1137	0.1596	0.1524			44	0.1149	0.1294	0.0732	0.1206
	44.5	0.1605	0.1372	0.1101	0.1059			44.5	0.1832	0.1661	0.1695	0.1051			44.5	0.1144	0.151	0.1224	0.0938			44.5	0.1156	0.112	0.1147	0.161	0.1535			44.5	0.1157	0.1298	0.0737	0.1213
	45	0.1613	0.1376	0.1104	0.1058			45	0.1832	0.1653	0.1689	0.1046			45	0.1138	0.1515	0.1231	0.0932			45	0.1163	0.1121	0.1156	0.1611	0.1548			45	0.1177	0.1292	0.0746	0.1221
	45.5	0.1624	0.1379	0.1102	0.1061			45.5	0.1844	0.1655	0.1691	0.1048			45.5	0.1153	0.1527	0.1225	0.0942			45.5	0.1164	0.1119	0.1165	0.1617	0.1559			45.5	0.1184	0.1298	0.0753	0.1231
	46	0.1623	0.1382	0.1106	0.1057			46	0.1855	0.1651	0.1686	0.105			46	0.1152	0.153	0.1222	0.0941			46	0.116	0.1122	0.1166	0.1622	0.1571			46	0.1195	0.1305	0.0762	0.1248
	46.5	0.1616	0.1384	0.111	0.1053			46.5	0.1845	0.1657	0.168	0.1051			46.5	0.1166	0.1529	0.1223	0.094			46.5	0.1169	0.1118	0.1171	0.1625	0.1573			46.5	0.1212	0.1301	0.0765	0.1257
	47	0.1638	0.1389	0.1113	0.1059			47	0.1844	0.1665	0.1683	0.1054			47	0.117	0.154	0.122	0.0938			47	0.1172	0.1122	0.1182	0.1631	0.158			47	0.1227	0.13	0.0772	0.1264
	47.5	0.1639	0.1395	0.1101	0.1056			47.5	0.1849	0.1661	0.1684	0.1048			47.5	0.117	0.1552	0.1217	0.0939			47.5	0.1172	0.1126	0.1177	0.1633	0.1588			47.5	0.1236	0.1295	0.0783	0.1277
	48	0.1651	0.14	0.1103	0.1058			48	0.1867	0.166	0.1683	0.1057			48	0.1184	0.1554	0.1222	0.0946			48	0.1175	0.1127	0.1189	0.163	0.1593			48	0.125	0.1297	0.0788	0.1285
	48.5	0.1654	0.1402	0.1101	0.1054			48.5	0.185	0.1658	0.168	0.105			48.5	0.1192	0.1568	0.1221	0.094			48.5	0.1173	0.1122	0.1198	0.1637	0.1606			48.5	0.1265	0.1295	0.0794	0.1293
	49	0.1652	0.1405	0.1103	0.1058			49	0.1852	0.1653	0.1687	0.1037			49	0.1194	0.1568	0.1217	0.0948			49	0.1177	0.1126	0.1203	0.1642	0.1621			49	0.1281	0.1301	0.0799	0.1303
	49.5	0.1657	0.1405	0.1105	0.1059			49.5	0.1836	0.1661	0.1685	0.1032			49.5	0.1192	0.157	0.1219	0.095			49.5	0.1168	0.112	0.1207	0.1636	0.1625			49.5	0.1288	0.1304	0.0802	0.1316
	50	0.168	0.1412	0.1106	0.1061			50	0.1853	0.1661	0.1682	0.1031			50	0.1196	0.1568	0.1219	0.0944			50	0.1173	0.1121	0.121	0.1642	0.1629			50	0.1294	0.1302	0.0815	0.1325
	50.5	0.1679	0.1414	0.1105	0.1063			50.5	0.1851	0.1659	0.1685	0.1037			50.5	0.1193	0.1587	0.1216	0.0947			50.5	0.118	0.1116	0.1216	0.1641	0.1641			50.5	0.1311	0.1297	0.082	0.1334
	51	0.1684	0.1421	0.1109	0.1069			51	0.1859	0.1664	0.1688	0.1048			51	0.1199	0.159	0.1221	0.0946			51	0.1179	0.1114	0.1219	0.1649	0.1642			51	0.132	0.1303	0.0827	0.1342
	51.5	0.1675	0.1426	0.1116	0.1072			51.5	0.1855	0.1663	0.1684	0.1056			51.5	0.1209	0.1598	0.1218	0.0952			51.5	0.1177	0.112	0.1228	0.1639	0.1651			51.5	0.1329	0.1311	0.0833	0.1355
	52	0.1677	0.143	0.1128	0.1074			52	0.1861	0.1674	0.1677	0.105			52	0.1216	0.1602	0.1221	0.0953			52	0.1176	0.1124	0.1225	0.1644	0.1656			52	0.1339	0.1311	0.0843	0.1363
	52.5	0.1688	0.1433	0.1134	0.1078			52.5	0.1861	0.1674	0.1684	0.1055			52.5	0.1208	0.1604	0.1224	0.0953			52.5	0.1173	0.1122	0.1231	0.164	0.1663			52.5	0.1349	0.1317	0.0847	0.1372
	53	0.1704	0.1434	0.1137	0.1082			53	0.1849	0.1677	0.169	0.1053			53	0.1214	0.1607	0.1231	0.0961			53	0.1176	0.1118	0.1237	0.164	0.1665			53	0.1355	0.1316	0.0854	0.1378
	53.5	0.1691	0.144	0.1142	0.1085			53.5	0.1836	0.1683	0.1687	0.105			53.5	0.122	0.1617	0.1232	0.0964			53.5	0.1182	0.1125	0.1244	0.1649	0.1683			53.5	0.1363	0.1314	0.0859	0.1396
	54	0.1698	0.1441	0.1143	0.1092			54	0.1873	0.1693	0.1683	0.1059			54	0.1222	0.1622	0.1239	0.0961			54	0.1187	0.1122	0.1249	0.1654	0.1683			54	0.1374	0.1324	0.0867	0.1401
	54.5	0.1705	0.1444	0.1149	0.1095			54.5	0.187	0.1698	0.1688	0.1051			54.5	0.1225	0.1621	0.1242	0.0963			54.5	0.1185	0.1126	0.1254	0.1671	0.1687			54.5	0.1377	0.1323	0.0873	0.1415
	55	0.1705	0.1443	0.1147	0.1099			55	0.1869	0.1706	0.1697	0.1054			55	0.1232	0.1616	0.1245	0.0972			55	0.1184	0.1124	0.1257	0.1647	0.1689			55	0.1393	0.1329	0.0881	0.1419
	55.5	0.1714	0.1442	0.1155	0.1103			55.5	0.1859	0.1711	0.1703	0.1053			55.5	0.1239	0.1635	0.1249	0.0974			55.5	0.1188	0.113	0.1262	0.1641	0.1707			55.5	0.1392	0.133	0.0885	0.1428
	56	0.1715	0.1445	0.116	0.1109			56	0.1864	0.1721	0.1702	0.1053			56	0.1252	0.1624	0.1253	0.0977			56	0.1186	0.1127	0.1265	0.1652	0.1706			56	0.1406	0.133	0.0893	0.1439
	56.5	0.1723	0.1452	0.1161	0.1115			56.5	0.186	0.1736	0.1709	0.1058			56.5	0.1231	0.1634	0.1251	0.0973			56.5	0.1186	0.1129	0.1273	0.1649	0.1714			56.5	0.1411	0.1338	0.0904	0.144
	57	0.173	0.1451	0.1166	0.112			57	0.1866	0.1739	0.1712	0.1059			57	0.1239	0.1645	0.1254	0.0979			57	0.1186	0.1135	0.1275	0.1651	0.1713			57	0.1421	0.1343	0.0904	0.1453
	57.5	0.1731	0.1453	0.1172	0.1123			57.5	0.1867	0.1742	0.1721	0.1052			57.5	0.1237	0.1648	0.1257	0.0982			57.5	0.1186	0.1135	0.1279	0.1654	0.1716			57.5	0.1428	0.135	0.0915	0.1463
	58	0.1735	0.1455	0.1171	0.1127			58	0.187	0.1754	0.1734	0.1051			58	0.1234	0.1649	0.126	0.0981			58	0.119	0.1135	0.1283	0.1664	0.1718			58	0.1433	0.1348	0.092	0.1469
	58.5	0.1739	0.1459	0.1175	0.113			58.5	0.1881	0.176	0.1741	0.1049			58.5	0.1234	0.165	0.1262	0.0984			58.5	0.1193	0.1137	0.129	0.1667	0.1727			58.5	0.1439	0.1361	0.0928	0.1477
	59	0.1759	0.146	0.1181	0.113			59	0.1877	0.1777	0.1752	0.1051			59	0.1258	0.1659	0.1264	0.0988			59	0.1189	0.1139	0.1295	0.1662	0.1729			59	0.1445	0.1364	0.0936	0.1489
	59.5	0.1756	0.146	0.1185	0.1133			59.5	0.189	0.1774	0.1756	0.1064			59.5	0.1263	0.1649	0.1269	0.0985			59.5	0.1189	0.1146	0.1304	0.1662	0.1721			59.5	0.1453	0.1369	0.0942	0.1491
	60	0.1764	0.1462	0.1185	0.1135			60	0.1877	0.1784	0.1768	0.1056			60	0.1268	0.167	0.1276	0.0996			60	0.1184	0.1144	0.1279	0.1662	0.1729			60	0.1463	0.1373	0.0946	0.1501
	60.5	0.1763	0.1461	0.1188	0.1137			60.5	0.1874	0.1795	0.1775	0.1054			60.5	0.1264	0.1672	0.1279	0.0991			60.5	0.1183	0.1143	0.1285	0.1667	0.1727			60.5	0.1474	0.1378	0.0953	0.1507
	61	0.1748	0.1464	0.1188	0.1139			61	0.188	0.1803	0.1781	0.1053			61	0.1265	0.1675	0.1286	0.0998			61	0.1186	0.1147	0.1303	0.1675	0.1731			61	0.1481	0.1386	0.0962	0.1518
	61.5	0.1753	0.1461	0.1186	0.1144			61.5	0.1892	0.1819	0.1786	0.1051			61.5	0.127	0.1677	0.1286	0.1001			61.5	0.119	0.1148	0.1317	0.1669	0.1738			61.5	0.1486	0.1403	0.0968	0.152
	62	0.1766	0.1462	0.1188	0.1146			62	0.1912	0.182	0.1801	0.1052			62	0.1283	0.1675	0.1289	0.1005			62	0.119	0.1148	0.1323	0.1675	0.1741			62	0.1489	0.1395	0.0976	0.1528
	62.5	0.1767	0.146	0.1182	0.1146			62.5	0.1917	0.1838	0.1809	0.1059			62.5	0.128	0.1688	0.129	0.1011			62.5	0.1191	0.1152	0.1334	0.1684	0.1749			62.5	0.1493	0.1403	0.0984	0.1531
	63	0.177	0.1452	0.118	0.1148			63	0.1907	0.1846	0.1828	0.1053			63	0.1284	0.1688	0.1294	0.1			63	0.1191	0.1154	0.1345	0.1683	0.1742			63	0.1495	0.1412	0.0989	0.1535
	63.5	0.1784	0.146	0.1178	0.1149			63.5	0.1917	0.1855	0.1827	0.106			63.5	0.1288	0.1694	0.1303	0.097			63.5	0.1191	0.1163	0.1348	0.1688	0.1747			63.5	0.1504	0.1414	0.0998	0.1538
	64	0.1773	0.1458	0.1176	0.1149			64	0.1916	0.187	0.1848	0.1058			64	0.1281	0.1701	0.13	0.0966			64	0.1191	0.1156	0.1355	0.1698	0.1758			64	0.1506	0.1425	0.1006	0.1542
	64.5	0.1771	0.146	0.1173	0.1148			64.5	0.1921	0.1874	0.186	0.1058			64.5	0.1297	0.1693	0.1303	0.0984			64.5	0.1192	0.1168	0.1363	0.1695	0.1746			64.5	0.1515	0.1424	0.1007	0.1542
	65	0.1796	0.146	0.117	0.1148			65	0.193	0.1883	0.1868	0.1058			65	0.1297	0.1694	0.1309	0.0997			65	0.1195	0.1167	0.1371	0.1698	0.174			65	0.1519	0.1437	0.1013	0.1553
	65.5	0.1788	0.1459	0.1171	0.1149			65.5	0.1924	0.1884	0.188	0.1062			65.5	0.1293	0.1699	0.1314	0.1012			65.5	0.119	0.117	0.1377	0.1703	0.175			65.5	0.1526	0.1437	0.1022	0.1556
	66	0.1774	0.1459	0.1169	0.1145			66	0.193	0.1892	0.189	0.1064			66	0.1307	0.1688	0.1311	0.102			66	0.12	0.1171	0.1376	0.1709	0.175			66	0.1535	0.1451	0.1026	0.156
	66.5	0.1792	0.146	0.117	0.1145			66.5	0.1929	0.1894	0.1895	0.1059			66.5	0.1306	0.1678	0.1311	0.1021			66.5	0.1201	0.1169	0.1388	0.1704	0.1748			66.5	0.1539	0.1456	0.1036	0.1559
	67	0.1788	0.1461	0.1161	0.1146			67	0.1937	0.1899	0.191	0.1059			67	0.1309	0.1673	0.1319	0.1021			67	0.1206	0.1175	0.1391	0.1709	0.1743			67	0.154	0.1458	0.1042	0.1564
	67.5	0.1795	0.1461	0.1161	0.1143			67.5	0.1939	0.1916	0.1919	0.1064			67.5	0.1311	0.1711	0.1317	0.1022			67.5	0.1208	0.1173	0.1403	0.1717	0.1748			67.5	0.1554	0.1463	0.105	0.157
	68	0.1798	0.1459	0.1164	0.1142			68	0.1942	0.1923	0.1932	0.1059			68	0.131	0.1713	0.1321	0.1025			68	0.1203	0.1172	0.139	0.1708	0.1744			68	0.1552	0.1465	0.1057	0.1572
	68.5	0.1795	0.146	0.1161	0.1142			68.5	0.1956	0.1928	0.1945	0.106			68.5	0.1312	0.1717	0.1322	0.1029			68.5	0.1204	0.1172	0.1381	0.1719	0.1741			68.5	0.1557	0.1467	0.1062	0.1568
	69	0.1798	0.1459	0.1158	0.1141			69	0.1956	0.1924	0.1948	0.106			69	0.1314	0.1719	0.1325	0.1035			69	0.1206	0.1172	0.1382	0.1723	0.1744			69	0.1564	0.1467	0.107	0.1568
	69.5	0.1805	0.1457	0.1153	0.1139			69.5	0.1958	0.1932	0.1962	0.1057			69.5	0.1315	0.172	0.1326	0.1024			69.5	0.1204	0.1177	0.1388	0.1723	0.174			69.5	0.1571	0.1478	0.1076	0.1566
	70	0.18	0.1457	0.1155	0.1138			70	0.1964	0.1943	0.1971	0.1054			70	0.132	0.1716	0.1326	0.1026			70	0.1208	0.1178	0.1398	0.1726	0.1733			70	0.1571	0.1479	0.108	0.1577
	70.5	0.1803	0.1454	0.1153	0.1137			70.5	0.1961	0.1941	0.198	0.1059			70.5	0.1323	0.1715	0.1332	0.1035			70.5	0.1209	0.1168	0.1402	0.1718	0.1741			70.5	0.1571	0.1482	0.1087	0.1572
	71	0.1804	0.1458	0.1151	0.1131			71	0.1961	0.1938	0.1989	0.1062			71	0.1326	0.1725	0.1332	0.1027			71	0.1208	0.1178	0.141	0.1726	0.1742			71	0.158	0.1486	0.1096	0.1575
	71.5	0.1795	0.1455	0.1152	0.113			71.5	0.196	0.1945	0.2001	0.1057			71.5	0.1332	0.1728	0.1338	0.1029			71.5	0.1208	0.1172	0.1429	0.1731	0.1739			71.5	0.1584	0.149	0.1101	0.1577
	72	0.1798	0.1458	0.115	0.1129			72	0.1955	0.1955	0.2009	0.106			72	0.1331	0.1723	0.1341	0.1041			72	0.1205	0.1181	0.1436	0.172	0.1732			72	0.1591	0.1488	0.1108	0.1576
	72.5	0.1798	0.1455	0.1151	0.1127			72.5	0.1958	0.1965	0.2014	0.1063			72.5	0.1337	0.1728	0.134	0.1035			72.5	0.1205	0.1175	0.1441	0.1736	0.1734			72.5	0.1596	0.1498	0.111	0.158
	73	0.18	0.1458	0.1149	0.1128			73	0.196	0.1969	0.2023	0.1063			73	0.1334	0.1734	0.134	0.1037			73	0.1202	0.118	0.1436	0.1734	0.1734			73	0.1602	0.1496	0.1117	0.1577
	73.5	0.18	0.1451	0.1147	0.1128			73.5	0.1964	0.1979	0.2028	0.106			73.5	0.1323	0.1727	0.1339	0.1044			73.5	0.1207	0.118	0.1444	0.1736	0.1728			73.5	0.1602	0.1494	0.1126	0.1583
	74	0.1798	0.145	0.1148	0.1126			74	0.1951	0.198	0.2027	0.1057			74	0.1332	0.173	0.1342	0.104			74	0.1205	0.1178	0.1446	0.1736	0.1727			74	0.1609	0.1497	0.1127	0.1579
	74.5	0.1806	0.1455	0.115	0.113			74.5	0.1948	0.1976	0.204	0.1059			74.5	0.1345	0.1732	0.134	0.1037			74.5	0.1205	0.1179	0.1452	0.1742	0.1724			74.5	0.1609	0.1497	0.1135	0.158
	75	0.1805	0.1451	0.1145	0.1129			75	0.1951	0.1974	0.2045	0.1056			75	0.134	0.1724	0.1344	0.1046			75	0.1205	0.118	0.1458	0.1734	0.1715			75	0.1617	0.1504	0.1142	0.1582
	75.5	0.1814	0.1455	0.1145	0.1132			75.5	0.1948	0.1968	0.2043	0.1069			75.5	0.1333	0.1725	0.134	0.1034			75.5	0.1206	0.1175	0.1463	0.1736	0.171			75.5	0.1614	0.1491	0.1145	0.1582
	76	0.1816	0.1455	0.1149	0.1132			76	0.1952	0.1966	0.2056	0.1058			76	0.1336	0.1725	0.1343	0.1037			76	0.1208	0.1174	0.1455	0.1729	0.1719			76	0.1624	0.1491	0.1153	0.1583
	76.5	0.1819	0.1454	0.1151	0.1131			76.5	0.1951	0.1969	0.2053	0.1064			76.5	0.1345	0.1716	0.1347	0.1037			76.5	0.1206	0.1174	0.146	0.1732	0.1706			76.5	0.1621	0.1494	0.1158	0.158
	77	0.1817	0.1459	0.1151	0.113			77	0.1948	0.1971	0.2058	0.1058			77	0.1334	0.1712	0.1344	0.1037			77	0.1208	0.1175	0.1462	0.1725	0.1706			77	0.1626	0.1489	0.1165	0.1581
	77.5	0.1801	0.1459	0.1153	0.1132			77.5	0.1958	0.1969	0.2047	0.1061			77.5	0.1343	0.1705	0.1341	0.1044			77.5	0.1208	0.1172	0.1459	0.1735	0.1705			77.5	0.163	0.1488	0.1169	0.1576
	78	0.1802	0.1466	0.1153	0.1132			78	0.1952	0.197	0.2051	0.1057			78	0.1346	0.1714	0.1347	0.1032			78	0.1206	0.1174	0.1463	0.1726	0.171			78	0.163	0.1481	0.1171	0.158
	78.5	0.1799	0.1464	0.1152	0.1131			78.5	0.1958	0.1978	0.2052	0.106			78.5	0.1342	0.1708	0.135	0.1034			78.5	0.1204	0.1172	0.1459	0.173	0.1703			78.5	0.164	0.1478	0.1181	0.1583
	79	0.1802	0.1468	0.1152	0.1133			79	0.1939	0.1971	0.2058	0.106			79	0.1346	0.1705	0.1354	0.1045			79	0.1199	0.1168	0.146	0.1731	0.1695			79	0.1639	0.1475	0.1183	0.1575
	79.5	0.1801	0.1463	0.1153	0.1135			79.5	0.1947	0.1977	0.2061	0.1058			79.5	0.135	0.1708	0.1357	0.1045			79.5	0.1193	0.117	0.1461	0.1725	0.1694			79.5	0.164	0.1469	0.1185	0.1576
	80	0.1804	0.1466	0.1157	0.1136			80	0.1947	0.1977	0.2046	0.1054			80	0.1354	0.1686	0.1353	0.103			80	0.1187	0.1172	0.1457	0.173	0.1698			80	0.1646	0.1468	0.1192	0.1574
	80.5	0.182	0.1473	0.1152	0.1137			80.5	0.1943	0.1982	0.2049	0.1056			80.5	0.1358	0.1681	0.1353	0.103			80.5	0.1184	0.1168	0.1455	0.1721	0.1693			80.5	0.1649	0.1461	0.1193	0.1575
	81	0.1801	0.1474	0.1153	0.1139			81	0.1944	0.1977	0.2056	0.1051			81	0.1355	0.1682	0.135	0.1036			81	0.118	0.1166	0.1455	0.1723	0.1691			81	0.165	0.1454	0.1199	0.1574
	81.5	0.1806	0.1476	0.1147	0.1141			81.5	0.1942	0.1979	0.2054	0.1055			81.5	0.1353	0.1668	0.1351	0.1036			81.5	0.1175	0.1172	0.1448	0.1723	0.1695			81.5	0.1649	0.1449	0.1203	0.1577
	82	0.1813	0.1477	0.1142	0.1141			82	0.1947	0.1971	0.2035	0.1053			82	0.1354	0.1697	0.1353	0.1041			82	0.1175	0.1164	0.1454	0.1723	0.1702			82	0.1653	0.1437	0.1206	0.1578
	82.5	0.1803	0.148	0.1141	0.1143			82.5	0.1944	0.1975	0.2025	0.1052			82.5	0.1343	0.1693	0.1352	0.1051			82.5	0.1172	0.1163	0.1443	0.1727	0.1697			82.5	0.1656	0.1436	0.1213	0.1574
	83	0.1794	0.1478	0.1139	0.1145			83	0.1926	0.1964	0.2021	0.1051			83	0.1339	0.1683	0.1355	0.1052			83	0.1174	0.1165	0.1442	0.1724	0.1688			83	0.166	0.1431	0.1216	0.1577
	83.5	0.1807	0.1476	0.1135	0.1144			83.5	0.1961	0.1968	0.2023	0.1055			83.5	0.1331	0.1687	0.1354	0.1046			83.5	0.1172	0.1167	0.1438	0.1724	0.1691			83.5	0.166	0.1426	0.1217	0.1572
	84	0.1805	0.1476	0.1128	0.1145			84	0.1944	0.1962	0.202	0.1052			84	0.1337	0.1686	0.1354	0.1049			84	0.1172	0.1163	0.1435	0.1724	0.1696			84	0.1661	0.1426	0.1223	0.1572
	84.5	0.1827	0.1477	0.1126	0.1142			84.5	0.1943	0.1964	0.2015	0.1048			84.5	0.1339	0.1678	0.1359	0.1053			84.5	0.1176	0.1162	0.1428	0.1732	0.1689			84.5	0.1663	0.1422	0.1226	0.1574
	85	0.1824	0.1477	0.1123	0.1141			85	0.1951	0.1954	0.2011	0.1041			85	0.1345	0.1679	0.1356	0.1051			85	0.1185	0.1161	0.1429	0.1731	0.1686			85	0.1662	0.142	0.1231	0.1572
	85.5	0.1804	0.1474	0.1118	0.1141			85.5	0.1946	0.1952	0.2003	0.1049			85.5	0.1339	0.1671	0.1363	0.1053			85.5	0.119	0.1165	0.1409	0.1719	0.1684			85.5	0.1662	0.1414	0.1232	0.1573
	86	0.181	0.1474	0.1115	0.1142			86	0.1945	0.1957	0.1991	0.105			86	0.1339	0.1666	0.1365	0.1052			86	0.1193	0.1165	0.1398	0.1727	0.1682			86	0.1666	0.1413	0.1236	0.1572
	86.5	0.1805	0.1472	0.1111	0.1138			86.5	0.1924	0.1956	0.1986	0.1054			86.5	0.1346	0.1667	0.1365	0.1052			86.5	0.1198	0.1164	0.1392	0.1725	0.1689			86.5	0.1665	0.1409	0.1239	0.1569
	87	0.1824	0.1473	0.1106	0.1138			87	0.1924	0.1953	0.1987	0.105			87	0.1346	0.167	0.1365	0.1052			87	0.12	0.1164	0.1393	0.173	0.1685			87	0.1666	0.1414	0.1243	0.1568
1000 ppm CO2	87.5	0.181	0.1469	0.1108	0.1141		1000 ppm CO2	87.5	0.1943	0.197	0.1991	0.1056		1000 ppm CO2	87.5	0.1356	0.1675	0.1374	0.107		1000 ppm CO2	87.5	0.1204	0.1177	0.1397	0.173	0.1686		1000 ppm CO2	87.5	0.1675	0.1416	0.1249	0.1566
	88	0.1817	0.1472	0.1108	0.1146			88	0.1958	0.1971	0.1989	0.1064			88	0.1378	0.1678	0.1377	0.1074			88	0.1216	0.1187	0.1404	0.1743	0.1693			88	0.1676	0.1422	0.1253	0.1573
	88.5	0.1819	0.1465	0.1104	0.1145			88.5	0.1951	0.1982	0.1996	0.1064			88.5	0.1373	0.1678	0.1384	0.1078			88.5	0.1215	0.118	0.1417	0.1741	0.169			88.5	0.1683	0.142	0.126	0.1578
	89	0.1816	0.1455	0.1097	0.1143			89	0.1947	0.1971	0.1988	0.1056			89	0.1362	0.1674	0.1373	0.107			89	0.121	0.1172	0.1422	0.1742	0.1671			89	0.1674	0.1414	0.126	0.1567
	89.5	0.1803	0.1444	0.108	0.113			89.5	0.1934	0.195	0.1978	0.1053			89.5	0.1361	0.1664	0.1362	0.1065			89.5	0.12	0.1163	0.1411	0.1722	0.1655			89.5	0.1664	0.1409	0.1248	0.1553
	90	0.1786	0.1423	0.1058	0.1109			90	0.1913	0.1932	0.1953	0.1043			90	0.1355	0.1626	0.1338	0.1057			90	0.1182	0.115	0.1391	0.1681	0.1626			90	0.165	0.1392	0.1239	0.1532
	90.5	0.175	0.139	0.1022	0.1067			90.5	0.1892	0.19	0.1916	0.103			90.5	0.1327	0.1574	0.1299	0.1029			90.5	0.1158	0.1121	0.1346	0.1636	0.1569			90.5	0.1616	0.1354	0.122	0.1492
	91	0.1704	0.1346	0.0976	0.1013			91	0.1861	0.1834	0.1866	0.1019			91	0.1291	0.1498	0.1239	0.1013			91	0.1131	0.1086	0.129	0.1555	0.148			91	0.1569	0.1303	0.1196	0.1436
	91.5	0.1647	0.1297	0.0925	0.0949			91.5	0.181	0.1757	0.1799	0.0988			91.5	0.1244	0.1403	0.1173	0.0981			91.5	0.1097	0.1033	0.1206	0.1459	0.1388			91.5	0.1502	0.1226	0.1162	0.1366
	92	0.1581	0.1249	0.0871	0.0887			92	0.1772	0.1664	0.1718	0.0973			92	0.1195	0.1315	0.1109	0.0962			92	0.1057	0.0977	0.1148	0.1369	0.1316			92	0.1423	0.1147	0.1125	0.1286
	92.5	0.152	0.1208	0.0827	0.0828			92.5	0.1737	0.1601	0.1636	0.095			92.5	0.1144	0.1239	0.1051	0.0934			92.5	0.1024	0.0923	0.1091	0.1275	0.123			92.5	0.134	0.1072	0.1083	0.1212
	93	0.1482	0.1173	0.0793	0.078			93	0.1708	0.1532	0.1564	0.0938			93	0.1096	0.1176	0.1002	0.0912			93	0.0994	0.0874	0.1032	0.1212	0.1171			93	0.1265	0.0998	0.104	0.1141
	93.5	0.1453	0.1142	0.0764	0.0739			93.5	0.1681	0.1475	0.1493	0.0919			93.5	0.1047	0.113	0.0971	0.0886			93.5	0.0975	0.0842	0.0988	0.115	0.1115			93.5	0.1194	0.0944	0.1001	0.108
	94	0.1423	0.1115	0.0739	0.0703			94	0.1655	0.1431	0.1437	0.0907			94	0.1002	0.1093	0.0938	0.088			94	0.095	0.0811	0.0947	0.1114	0.1079			94	0.1135	0.0899	0.0957	0.1024
	94.5	0.1398	0.1099	0.0717	0.0674			94.5	0.1637	0.1398	0.1392	0.0888			94.5	0.0974	0.1063	0.0913	0.0867			94.5	0.0945	0.0788	0.0918	0.1075	0.1046			94.5	0.1085	0.086	0.0914	0.098
	95	0.137	0.1079	0.07	0.0655			95	0.1626	0.1365	0.1354	0.0883			95	0.0951	0.1042	0.0903	0.0854			95	0.0931	0.0779	0.0888	0.1059	0.1016			95	0.1036	0.083	0.0882	0.0944
	95.5	0.1357	0.1069	0.0692	0.0636			95.5	0.1615	0.1346	0.1317	0.0876			95.5	0.0939	0.102	0.0889	0.085			95.5	0.0923	0.0759	0.0864	0.1034	0.1005			95.5	0.1003	0.0808	0.0853	0.0915
	96	0.1333	0.1055	0.0681	0.0621			96	0.1611	0.1325	0.1294	0.0853			96	0.0912	0.1012	0.088	0.0842			96	0.0917	0.0747	0.0842	0.1023	0.0984			96	0.097	0.0789	0.0826	0.0885
	96.5	0.1318	0.1046	0.0672	0.0611			96.5	0.1597	0.1305	0.1269	0.0855			96.5	0.0919	0.1	0.0874	0.0844			96.5	0.0913	0.0744	0.0821	0.1015	0.0975			96.5	0.094	0.0769	0.0802	0.0863
	97	0.1315	0.1036	0.0665	0.0599			97	0.159	0.1293	0.1254	0.0848			97	0.0921	0.0998	0.0867	0.0836			97	0.0908	0.0742	0.081	0.1011	0.0958			97	0.0916	0.0751	0.0783	0.0848
	97.5	0.1294	0.1028	0.0661	0.0589			97.5	0.1587	0.1283	0.1238	0.0841			97.5	0.0926	0.0995	0.0869	0.0839			97.5	0.0905	0.0737	0.0799	0.1012	0.0949			97.5	0.0889	0.0735	0.0764	0.0827
	98	0.1278	0.1021	0.066	0.0584			98	0.1583	0.1274	0.1219	0.0851			98	0.0915	0.0978	0.0863	0.0843			98	0.0902	0.0735	0.0791	0.1006	0.0942			98	0.0875	0.0724	0.075	0.0813
	98.5	0.1271	0.1016	0.0651	0.0574			98.5	0.158	0.1272	0.121	0.0848			98.5	0.0909	0.0979	0.0862	0.0833			98.5	0.0906	0.0733	0.0783	0.1006	0.0935			98.5	0.0853	0.0712	0.0737	0.0796
	99	0.1262	0.1009	0.0648	0.057			99	0.157	0.127	0.1195	0.0851			99	0.0905	0.0975	0.0864	0.083			99	0.091	0.0732	0.0779	0.1016	0.0934			99	0.0837	0.0708	0.0728	0.0786
	99.5	0.1255	0.1007	0.0644	0.0564			99.5	0.1574	0.1267	0.1196	0.0857			99.5	0.0915	0.0974	0.0861	0.0832			99.5	0.0904	0.0737	0.0755	0.102	0.0924			99.5	0.0821	0.07	0.0718	0.0781
	100	0.1242	0.1003	0.0641	0.0557			100	0.1572	0.1268	0.119	0.0855			100	0.0907	0.0971	0.0855	0.0823			100	0.0911	0.0734	0.074	0.1022	0.0921			100	0.0808	0.0694	0.0705	0.0773
	100.5	0.1239	0.0995	0.0636	0.0553			100.5	0.157	0.1257	0.1185	0.0851			100.5	0.091	0.0976	0.086	0.0826			100.5	0.0904	0.0736	0.0741	0.1029	0.0923			100.5	0.0794	0.0682	0.0701	0.0763
	101	0.1231	0.0989	0.0632	0.0549			101	0.1572	0.1246	0.1173	0.0851			101	0.0899	0.0967	0.0858	0.0825			101	0.0906	0.0741	0.0735	0.1042	0.0918			101	0.0792	0.0674	0.0695	0.0758
	101.5	0.1228	0.0982	0.0626	0.0548			101.5	0.1563	0.1243	0.117	0.0854			101.5	0.0907	0.0967	0.0858	0.0828			101.5	0.0902	0.0743	0.0732	0.1044	0.0909			101.5	0.0783	0.0671	0.0692	0.0746
	102	0.1219	0.0977	0.0622	0.0544			102	0.1565	0.1241	0.1164	0.0863			102	0.0908	0.0971	0.0858	0.0822			102	0.0901	0.0743	0.0729	0.1059	0.0907			102	0.0779	0.0662	0.0689	0.0741
	102.5	0.1211	0.0974	0.0617	0.0548			102.5	0.1574	0.1237	0.1164	0.0862			102.5	0.091	0.0978	0.0852	0.0825			102.5	0.0903	0.0743	0.0734	0.1062	0.0908			102.5	0.0774	0.0661	0.0683	0.0735
	103	0.1207	0.0972	0.061	0.0544			103	0.1561	0.1231	0.1158	0.0853			103	0.0907	0.098	0.0852	0.0822			103	0.0905	0.075	0.0747	0.1074	0.0906			103	0.0766	0.0655	0.0678	0.0728
	103.5	0.1203	0.0964	0.0607	0.0545			103.5	0.1565	0.123	0.1157	0.0854			103.5	0.0913	0.098	0.0853	0.0819			103.5	0.0901	0.075	0.0751	0.1087	0.0901			103.5	0.0762	0.0652	0.0678	0.0728
	104	0.1193	0.0959	0.0602	0.0543			104	0.1568	0.1224	0.1152	0.0856			104	0.0908	0.0983	0.0852	0.0815			104	0.0903	0.0755	0.0751	0.1093	0.0902			104	0.0753	0.0647	0.0659	0.0721
	104.5	0.1195	0.0953	0.0598	0.0542			104.5	0.1567	0.1224	0.115	0.0858			104.5	0.0909	0.0984	0.085	0.0821			104.5	0.0901	0.0759	0.0752	0.1099	0.0907			104.5	0.0744	0.0642	0.0655	0.0716
	105	0.1189	0.095	0.0594	0.0543			105	0.1561	0.122	0.1149	0.086			105	0.0916	0.0994	0.0848	0.0818			105	0.0895	0.0761	0.0752	0.111	0.0906			105	0.0744	0.0639	0.0666	0.0711
	105.5	0.1191	0.0946	0.0591	0.0546			105.5	0.1566	0.1218	0.1151	0.086			105.5	0.0914	0.0989	0.0843	0.0811			105.5	0.0901	0.0767	0.0749	0.1114	0.0901			105.5	0.0745	0.0636	0.0667	0.0709
	106	0.1186	0.0944	0.0589	0.0548			106	0.1562	0.1224	0.1155	0.0855			106	0.0915	0.0994	0.0847	0.081			106	0.0902	0.0765	0.0752	0.1123	0.09			106	0.0744	0.0634	0.0663	0.0704
	106.5	0.1185	0.0936	0.0588	0.0551			106.5	0.1565	0.1219	0.1162	0.0864			106.5	0.0915	0.0998	0.0848	0.0811			106.5	0.0899	0.0764	0.0754	0.1116	0.091			106.5	0.0745	0.0632	0.0666	0.0703
	107	0.1186	0.0939	0.0587	0.0554			107	0.1561	0.1226	0.1163	0.0866			107	0.0915	0.1009	0.0854	0.0819			107	0.0903	0.0772	0.0751	0.1125	0.0908			107	0.0742	0.0634	0.0663	0.0634
	107.5	0.1183	0.0935	0.0586	0.0554			107.5	0.1559	0.1228	0.1162	0.0864			107.5	0.0918	0.1003	0.0854	0.0816			107.5	0.0904	0.0767	0.0752	0.1119	0.0902			107.5	0.0736	0.0631	0.066	0.0667
	108	0.1192	0.0934	0.0583	0.0558			108	0.1562	0.1229	0.117	0.0865			108	0.0921	0.1008	0.0857	0.0822			108	0.0904	0.0774	0.075	0.1132	0.0909			108	0.0737	0.0631	0.0662	0.069
	108.5	0.1191	0.0931	0.0583	0.0562			108.5	0.1558	0.1238	0.1171	0.0862			108.5	0.092	0.101	0.0859	0.0821			108.5	0.0908	0.0779	0.0755	0.1139	0.0907			108.5	0.0735	0.0632	0.0659	0.0692
	109	0.1193	0.0936	0.0584	0.0565			109	0.1562	0.124	0.1174	0.0845			109	0.0917	0.1007	0.0858	0.0807			109	0.0906	0.078	0.076	0.1146	0.0902			109	0.0732	0.0629	0.0661	0.0694
	109.5	0.1195	0.0937	0.0583	0.057			109.5	0.1556	0.1238	0.1174	0.0863			109.5	0.0926	0.102	0.0862	0.0808			109.5	0.091	0.078	0.0767	0.1148	0.09			109.5	0.0737	0.0628	0.066	0.069
	110	0.1203	0.0935	0.0582	0.0572			110	0.1566	0.1232	0.1181	0.0868			110	0.0924	0.1015	0.0858	0.0825			110	0.0915	0.0789	0.0771	0.1145	0.0909			110	0.0735	0.0628	0.0662	0.0687
	110.5	0.1197	0.0936	0.0583	0.0573			110.5	0.1564	0.1236	0.1185	0.0875			110.5	0.0926	0.1016	0.086	0.0824			110.5	0.0909	0.0786	0.0765	0.1161	0.0908			110.5	0.0742	0.0629	0.066	0.0686
	111	0.1203	0.0941	0.0586	0.0577			111	0.1563	0.1235	0.1193	0.0874			111	0.0926	0.102	0.0863	0.0818			111	0.0915	0.0791	0.0771	0.1161	0.0901			111	0.0739	0.0629	0.0659	0.0684
	111.5	0.1199	0.0945	0.0582	0.0578			111.5	0.1557	0.1243	0.1188	0.0874			111.5	0.0919	0.1017	0.0864	0.0833			111.5	0.0912	0.0794	0.0771	0.1163	0.0904			111.5	0.0743	0.063	0.0659	0.0682
	112	0.1201	0.0944	0.0576	0.058			112	0.1561	0.1249	0.1192	0.0874			112	0.0925	0.1018	0.0867	0.0826			112	0.0911	0.0794	0.0771	0.1166	0.0898			112	0.0741	0.0628	0.0655	0.0679
	112.5	0.1209	0.0947	0.0577	0.0582			112.5	0.1563	0.1245	0.1201	0.0875			112.5	0.0926	0.1018	0.0864	0.0829			112.5	0.091	0.0804	0.0768	0.1166	0.0903			112.5	0.0737	0.0632	0.0656	0.0674
	113	0.1208	0.0953	0.0579	0.0583			113	0.1561	0.1249	0.1198	0.0876			113	0.0922	0.1014	0.0868	0.0826			113	0.0911	0.0805	0.0775	0.117	0.0905			113	0.0745	0.0631	0.0656	0.0675
	113.5	0.1212	0.0957	0.0591	0.0583			113.5	0.1562	0.125	0.1205	0.0876			113.5	0.0919	0.101	0.0865	0.0825			113.5	0.0911	0.0802	0.0774	0.1165	0.0894			113.5	0.0746	0.0634	0.0658	0.0673
	114	0.1211	0.0959	0.0594	0.0584			114	0.1568	0.1251	0.1208	0.0874			114	0.0922	0.1011	0.087	0.0827			114	0.0911	0.0807	0.0778	0.1166	0.0901			114	0.0745	0.0634	0.0662	0.0675
	114.5	0.1214	0.097	0.0596	0.0587			114.5	0.1571	0.1264	0.1212	0.0877			114.5	0.0926	0.1009	0.0866	0.0825			114.5	0.0922	0.081	0.0781	0.118	0.0892			114.5	0.0749	0.0634	0.0656	0.0673
	115	0.1217	0.0969	0.0597	0.0586			115	0.1572	0.1266	0.1218	0.088			115	0.0928	0.101	0.086	0.0828			115	0.0917	0.081	0.078	0.1174	0.0897			115	0.075	0.0637	0.0659	0.0671
	115.5	0.1222	0.0973	0.06	0.0585			115.5	0.1571	0.1268	0.1223	0.0882			115.5	0.0933	0.0987	0.086	0.083			115.5	0.092	0.0808	0.0781	0.1178	0.0896			115.5	0.0749	0.0634	0.0657	0.067
	116	0.1217	0.0974	0.0599	0.0586			116	0.1567	0.1268	0.123	0.0882			116	0.0927	0.0987	0.0865	0.0829			116	0.0916	0.0813	0.078	0.1182	0.089			116	0.0751	0.064	0.0656	0.0669
	116.5	0.1216	0.0975	0.06	0.0587			116.5	0.1566	0.1269	0.1233	0.0887			116.5	0.0933	0.0977	0.0859	0.0827			116.5	0.0921	0.0811	0.077	0.1168	0.0894			116.5	0.0754	0.0643	0.0654	0.0668
	117	0.1215	0.0974	0.06	0.0587			117	0.1562	0.1275	0.1238	0.0887			117	0.0926	0.099	0.0862	0.0827			117	0.0914	0.0809	0.0766	0.1174	0.0894			117	0.0755	0.0643	0.0653	0.0662
	117.5	0.122	0.097	0.0598	0.0585			117.5	0.156	0.1275	0.1242	0.0883			117.5	0.0935	0.0994	0.0856	0.082			117.5	0.0916	0.0811	0.0775	0.1178	0.0889			117.5	0.0752	0.0646	0.0653	0.0665
	118	0.1216	0.0973	0.0598	0.0587			118	0.1556	0.1276	0.1246	0.0894			118	0.0933	0.0996	0.086	0.0825			118	0.0914	0.0815	0.0778	0.1173	0.0887			118	0.076	0.0648	0.065	0.066
	118.5	0.1216	0.0975	0.0596	0.0584			118.5	0.1557	0.1278	0.1249	0.0893			118.5	0.0931	0.0976	0.0861	0.0825			118.5	0.0916	0.0814	0.0776	0.1188	0.0881			118.5	0.0759	0.0649	0.0651	0.0663
	119	0.1217	0.0968	0.0593	0.0586			119	0.1558	0.1267	0.1254	0.0889			119	0.0921	0.0976	0.0858	0.0822			119	0.0916	0.0819	0.0781	0.1165	0.0874			119	0.0762	0.065	0.0651	0.0661
	119.5	0.1225	0.0967	0.0593	0.0585			119.5	0.1558	0.1271	0.1256	0.0886			119.5	0.0931	0.0972	0.0853	0.0825			119.5	0.0915	0.0813	0.0778	0.117	0.0884			119.5	0.0765	0.0649	0.0652	0.0657
	120	0.1214	0.0959	0.0592	0.0584			120	0.1559	0.1272	0.1261	0.0887			120	0.0934	0.0973	0.0857	0.0827			120	0.0915	0.0814	0.0773	0.117	0.088			120	0.0764	0.0646	0.0648	0.0652
	120.5	0.1211	0.0959	0.0589	0.0584			120.5	0.1555	0.1264	0.1266	0.0892			120.5	0.0935	0.0974	0.0859	0.0812			120.5	0.0914	0.0822	0.0772	0.1175	0.0873			120.5	0.076	0.0646	0.0649	0.0654
	121	0.1211	0.0958	0.0586	0.0584			121	0.1554	0.1265	0.1269	0.0891			121	0.093	0.0966	0.0853	0.081			121	0.0914	0.0819	0.0772	0.1168	0.087			121	0.0763	0.0645	0.0646	0.0654
	121.5	0.121	0.0953	0.0585	0.0586			121.5	0.1555	0.126	0.1273	0.09			121.5	0.0933	0.0961	0.0855	0.0818			121.5	0.0915	0.0822	0.0765	0.1178	0.0875			121.5	0.0762	0.0643	0.0648	0.0651
	122	0.1209	0.0951	0.0578	0.0583			122	0.1552	0.1262	0.1277	0.0901			122	0.0933	0.0956	0.0855	0.0825			122	0.0915	0.0823	0.0769	0.1178	0.0884			122	0.0762	0.0641	0.0645	0.0649
	122.5	0.1213	0.095	0.0578	0.0586			122.5	0.1556	0.1261	0.1274	0.0905			122.5	0.0925	0.0966	0.0857	0.082			122.5	0.0915	0.0826	0.0773	0.118	0.0879			122.5	0.0765	0.0638	0.0642	0.065
	123	0.121	0.0949	0.0575	0.0586			123	0.1559	0.1266	0.1275	0.0898			123	0.0935	0.097	0.0855	0.0825			123	0.0921	0.0827	0.0769	0.1172	0.0872			123	0.0762	0.0634	0.0643	0.0648
	123.5	0.1208	0.0951	0.0573	0.0589			123.5	0.1558	0.1275	0.1283	0.09			123.5	0.0934	0.0966	0.0852	0.0821			123.5	0.0917	0.0828	0.0753	0.1173	0.0877			123.5	0.0768	0.0633	0.0642	0.0646
	124	0.1208	0.0946	0.0573	0.0591			124	0.1562	0.1272	0.129	0.09			124	0.0932	0.0981	0.0858	0.0821			124	0.0919	0.0829	0.0745	0.1188	0.0872			124	0.0768	0.0628	0.0641	0.0644
	124.5	0.1208	0.0946	0.0572	0.059			124.5	0.1556	0.127	0.1291	0.0903			124.5	0.0924	0.0987	0.0856	0.0821			124.5	0.0918	0.083	0.0741	0.1188	0.0876			124.5	0.077	0.0626	0.064	0.0647
	125	0.1206	0.0936	0.0569	0.0592			125	0.1554	0.1268	0.1292	0.0903			125	0.0932	0.0969	0.0856	0.0822			125	0.0913	0.0833	0.0736	0.1188	0.0869			125	0.0771	0.0617	0.0641	0.0648
	125.5	0.121	0.0936	0.0571	0.0592			125.5	0.156	0.1271	0.1297	0.0905			125.5	0.0936	0.0975	0.086	0.0814			125.5	0.0916	0.0833	0.0733	0.1197	0.087			125.5	0.0771	0.062	0.0638	0.0643
	126	0.1214	0.0944	0.0569	0.0592			126	0.1558	0.1266	0.1304	0.0907			126	0.0926	0.0977	0.0857	0.0816			126	0.0914	0.0839	0.0737	0.1185	0.087			126	0.077	0.0615	0.0639	0.0639
	126.5	0.1212	0.0949	0.0565	0.0591			126.5	0.157	0.1267	0.1305	0.0905			126.5	0.0929	0.0982	0.0855	0.0818			126.5	0.0916	0.0837	0.0736	0.1196	0.0879			126.5	0.0773	0.0616	0.0635	0.0638
	127	0.1216	0.0952	0.0558	0.0594			127	0.1559	0.1267	0.1305	0.0908			127	0.0932	0.0974	0.0857	0.0817			127	0.0905	0.0835	0.0729	0.1201	0.0875			127	0.0774	0.0615	0.0635	0.0634
	127.5	0.121	0.0951	0.0557	0.0592			127.5	0.1566	0.1273	0.13	0.091			127.5	0.093	0.0967	0.0855	0.0816			127.5	0.0914	0.0839	0.0732	0.1202	0.0878			127.5	0.0775	0.0611	0.0635	0.0638
	128	0.1214	0.0954	0.0558	0.0593			128	0.1564	0.1273	0.1299	0.0898			128	0.0928	0.0971	0.0856	0.082			128	0.091	0.0845	0.0735	0.1197	0.0878			128	0.0775	0.0614	0.0631	0.0631
	128.5	0.1202	0.0957	0.0562	0.0593			128.5	0.1566	0.1273	0.131	0.0889			128.5	0.094	0.0975	0.0853	0.0819			128.5	0.0914	0.0845	0.0735	0.1194	0.088			128.5	0.0777	0.0608	0.063	0.0633
	129	0.1211	0.0959	0.0562	0.0592			129	0.1563	0.1271	0.1316	0.0907			129	0.0927	0.0987	0.0859	0.0817			129	0.0916	0.0847	0.0755	0.1189	0.0873			129	0.0773	0.0612	0.0631	0.0632
	129.5	0.1214	0.0963	0.0563	0.0594			129.5	0.1565	0.1276	0.1328	0.0905			129.5	0.0928	0.0978	0.0865	0.0818			129.5	0.091	0.085	0.0758	0.1198	0.0879			129.5	0.0777	0.061	0.0632	0.0632
	130	0.1212	0.0969	0.0568	0.0593			130	0.1565	0.1278	0.1321	0.0907			130	0.094	0.0992	0.0859	0.0802			130	0.0908	0.0852	0.0758	0.1203	0.0869			130	0.0778	0.0612	0.063	0.0631
	130.5	0.1216	0.0977	0.0578	0.0594			130.5	0.1566	0.1271	0.1321	0.0904			130.5	0.0922	0.0989	0.0859	0.081			130.5	0.0909	0.0855	0.0759	0.1207	0.0866			130.5	0.0781	0.0609	0.0627	0.0631
	131	0.1216	0.0978	0.0571	0.059			131	0.156	0.1272	0.132	0.0906			131	0.0926	0.0993	0.0861	0.0818			131	0.0914	0.0855	0.0762	0.1209	0.0859			131	0.0778	0.0609	0.0628	0.0629
	131.5	0.1219	0.0981	0.0569	0.0592			131.5	0.1571	0.1271	0.1318	0.091			131.5	0.0916	0.0987	0.086	0.0819			131.5	0.0912	0.0862	0.0762	0.1208	0.086			131.5	0.0778	0.061	0.0625	0.0623
	132	0.122	0.0979	0.057	0.0594			132	0.1567	0.1267	0.1319	0.0914			132	0.093	0.0993	0.0865	0.082			132	0.0914	0.0861	0.0762	0.1205	0.0859			132	0.0779	0.0612	0.0628	0.0627
	132.5	0.1223	0.0982	0.0572	0.0597			132.5	0.1565	0.1263	0.1327	0.0916			132.5	0.093	0.0982	0.086	0.0822			132.5	0.0907	0.0865	0.076	0.1204	0.0872			132.5	0.0782	0.0612	0.0625	0.0627
	133	0.1224	0.0983	0.0574	0.0598			133	0.1571	0.1263	0.1329	0.0913			133	0.0935	0.0982	0.0864	0.0819			133	0.0911	0.087	0.0741	0.1208	0.0869			133	0.0779	0.0613	0.0626	0.0628
	133.5	0.1216	0.0983	0.0576	0.0599			133.5	0.1563	0.127	0.1332	0.0911			133.5	0.093	0.0981	0.0862	0.0813			133.5	0.0912	0.0874	0.0738	0.1211	0.0867			133.5	0.0779	0.0613	0.0626	0.0628
	134	0.1229	0.0982	0.0576	0.0597			134	0.1562	0.1267	0.133	0.0916			134	0.0927	0.0976	0.0864	0.0823			134	0.0918	0.0874	0.0741	0.121	0.0866			134	0.0777	0.0613	0.0625	0.0623
	134.5	0.1227	0.0981	0.0577	0.0598			134.5	0.1561	0.1255	0.1333	0.0908			134.5	0.0929	0.0982	0.0863	0.082			134.5	0.0913	0.0883	0.0736	0.1211	0.087			134.5	0.0778	0.0613	0.0625	0.0625
	135	0.1222	0.098	0.0587	0.0599			135	0.1569	0.1258	0.1337	0.0904			135	0.0929	0.0972	0.0863	0.0816			135	0.0913	0.0885	0.0737	0.121	0.0865			135	0.078	0.062	0.0624	0.0629
	135.5	0.1227	0.0978	0.059	0.0598			135.5	0.1562	0.1273	0.1337	0.0914			135.5	0.092	0.0974	0.0865	0.0811			135.5	0.0908	0.089	0.0739	0.1207	0.0868			135.5	0.0781	0.0619	0.0622	0.0628
	136	0.1225	0.0976	0.0586	0.0599			136	0.1567	0.1288	0.1338	0.0911			136	0.092	0.0993	0.0868	0.0808			136	0.0908	0.0895	0.0736	0.1217	0.0854			136	0.0784	0.0624	0.0623	0.0626
	136.5	0.1226	0.0973	0.0589	0.0597			136.5	0.1568	0.1282	0.1337	0.0909			136.5	0.0939	0.0986	0.0865	0.0812			136.5	0.091	0.0898	0.0755	0.1216	0.0857			136.5	0.078	0.0629	0.0626	0.0627
	137	0.1226	0.0972	0.059	0.0593			137	0.1567	0.128	0.1348	0.0913			137	0.0932	0.0988	0.0861	0.0815			137	0.0911	0.0907	0.0764	0.1209	0.0851			137	0.0783	0.0627	0.0625	0.0624
	137.5	0.1232	0.0969	0.0588	0.0593			137.5	0.1569	0.1275	0.1345	0.0912			137.5	0.0919	0.0988	0.0866	0.08			137.5	0.0912	0.0899	0.076	0.1211	0.0855			137.5	0.0784	0.0627	0.0627	0.0626
	138	0.1228	0.0966	0.0585	0.0599			138	0.1567	0.128	0.1348	0.0913			138	0.0913	0.0986	0.0861	0.0801			138	0.0909	0.0906	0.0767	0.1221	0.0855			138	0.0781	0.063	0.0626	0.0624
	138.5	0.1229	0.0967	0.0584	0.0598			138.5	0.1558	0.1272	0.1349	0.0914			138.5	0.0925	0.0969	0.0862	0.0796			138.5	0.0909	0.0907	0.076	0.1208	0.086			138.5	0.0783	0.0632	0.0624	0.0626
	139	0.1235	0.0965	0.0583	0.0604			139	0.1561	0.1275	0.1354	0.0914			139	0.0926	0.0986	0.0861	0.0807			139	0.091	0.091	0.0766	0.1218	0.0854			139	0.0781	0.0632	0.0624	0.0622
	139.5	0.1238	0.0965	0.0585	0.0602			139.5	0.1564	0.1272	0.1356	0.0915			139.5	0.0936	0.0982	0.0861	0.0815			139.5	0.091	0.0908	0.0765	0.1216	0.0855			139.5	0.0783	0.0631	0.0625	0.0621
	140	0.1237	0.0964	0.0583	0.0602			140	0.1565	0.1273	0.1355	0.0916			140	0.0923	0.0981	0.086	0.0821			140	0.0916	0.0907	0.0763	0.1217	0.0853			140	0.0782	0.0632	0.0624	0.0611
	140.5	0.1232	0.0963	0.0582	0.0602			140.5	0.1564	0.1277	0.1357	0.092			140.5	0.093	0.0979	0.0865	0.0818			140.5	0.0911	0.0906	0.0762	0.1206	0.0856			140.5	0.0783	0.063	0.0625	0.0616
	141	0.1241	0.0963	0.058	0.0604			141	0.1566	0.1274	0.1355	0.0914			141	0.0922	0.0983	0.0858	0.0812			141	0.0913	0.09	0.0768	0.12	0.0857			141	0.0782	0.0628	0.0624	0.0613
	141.5	0.1241	0.0965	0.0579	0.0603			141.5	0.1571	0.1271	0.1358	0.0918			141.5	0.0928	0.0982	0.0858	0.082			141.5	0.0911	0.0902	0.0767	0.1218	0.0856			141.5	0.0785	0.0624	0.0625	0.0614
	142	0.1234	0.0965	0.0581	0.0606			142	0.1569	0.1274	0.1354	0.0913			142	0.0936	0.0987	0.0863	0.0815			142	0.0912	0.0904	0.0767	0.1219	0.085			142	0.0787	0.0622	0.0624	0.0613
	142.5	0.1239	0.0967	0.057	0.0606			142.5	0.1568	0.1275	0.1352	0.0914			142.5	0.093	0.0986	0.0863	0.0813			142.5	0.0908	0.0901	0.077	0.1225	0.0861			142.5	0.0786	0.0619	0.0624	0.0614
	143	0.1245	0.0967	0.0581	0.0606			143	0.1561	0.1267	0.1348	0.0914			143	0.0938	0.0991	0.0861	0.0814			143	0.0911	0.09	0.077	0.1215	0.0855			143	0.0788	0.0612	0.0625	0.0617
	143.5	0.1244	0.0965	0.0583	0.0606			143.5	0.157	0.1263	0.1347	0.0918			143.5	0.0941	0.0992	0.0851	0.0811			143.5	0.0909	0.0898	0.0772	0.1221	0.0863			143.5	0.0787	0.0612	0.0625	0.0617
	144	0.1243	0.0973	0.0585	0.0607			144	0.1568	0.127	0.1347	0.0918			144	0.0934	0.0977	0.0848	0.0816			144	0.091	0.0896	0.0773	0.1226	0.0854			144	0.0792	0.061	0.0625	0.0617
	144.5	0.124	0.0976	0.0586	0.0608			144.5	0.157	0.1263	0.1343	0.0918			144.5	0.0941	0.0983	0.0852	0.0818			144.5	0.0913	0.0891	0.077	0.1213	0.0861			144.5	0.0791	0.061	0.0627	0.0618
	145	0.1243	0.0984	0.0585	0.0607			145	0.1568	0.1265	0.1349	0.0915			145	0.0931	0.0988	0.0846	0.0828			145	0.0908	0.0891	0.0768	0.1214	0.0864			145	0.0786	0.0608	0.0627	0.0618
	145.5	0.1243	0.0985	0.0587	0.0609			145.5	0.1565	0.1265	0.1347	0.0918			145.5	0.0941	0.0991	0.0844	0.0821			145.5	0.0908	0.0861	0.0765	0.1219	0.0864			145.5	0.0791	0.0604	0.0625	0.0615
	146	0.1238	0.0991	0.0587	0.0607			146	0.1566	0.1272	0.1337	0.092			146	0.0933	0.099	0.0848	0.0824			146	0.0906	0.0877	0.0769	0.1216	0.0861			146	0.0788	0.0603	0.0625	0.0617
	146.5	0.1239	0.0994	0.0586	0.061			146.5	0.1568	0.1271	0.1345	0.0922			146.5	0.0939	0.0993	0.0821	0.0827			146.5	0.0907	0.0882	0.077	0.1211	0.0866			146.5	0.079	0.0604	0.0626	0.0616
	147	0.1241	0.0992	0.0588	0.0611			147	0.1567	0.1271	0.1344	0.092			147	0.093	0.0985	0.0838	0.0817			147	0.0901	0.0876	0.0769	0.1217	0.0869			147	0.0788	0.0601	0.0626	0.0615
	147.5	0.1245	0.0993	0.059	0.0609			147.5	0.1569	0.1274	0.1349	0.0931			147.5	0.0939	0.098	0.0853	0.0814			147.5	0.0905	0.0873	0.077	0.1215	0.0863			147.5	0.0791	0.0605	0.0626	0.0612
	148	0.1244	0.0994	0.059	0.0611			148	0.1565	0.1276	0.1347	0.0924			148	0.0927	0.0979	0.0851	0.0813			148	0.091	0.0866	0.0772	0.1209	0.0861			148	0.0787	0.0606	0.0628	0.0614
	148.5	0.1244	0.0994	0.0592	0.0609			148.5	0.1569	0.1279	0.1356	0.0922			148.5	0.0936	0.0987	0.0852	0.0812			148.5	0.0906	0.0862	0.0772	0.1217	0.0872			148.5	0.0789	0.0608	0.0627	0.0615
	149	0.1242	0.0994	0.0584	0.061			149	0.1565	0.1281	0.135	0.0931			149	0.0928	0.0981	0.0848	0.0812			149	0.0904	0.0863	0.0769	0.1215	0.0863			149	0.0788	0.0604	0.0626	0.0614
	149.5	0.1248	0.0995	0.0584	0.0611			149.5	0.1567	0.1287	0.1349	0.0925			149.5	0.0926	0.0997	0.0845	0.0813			149.5	0.0902	0.0857	0.0773	0.1218	0.0877			149.5	0.0788	0.0608	0.0627	0.0617
	150	0.1247	0.0994	0.0585	0.0609			150	0.1569	0.1282	0.1349	0.0924			150	0.0924	0.099	0.0844	0.0811			150	0.0908	0.0856	0.0771	0.1222	0.0882			150	0.079	0.0604	0.0625	0.0614
