# Supplementary material for: FRET kinase sensor development reveals SnRK2/OST1 activation by ABA but not by MeJA and high CO2 during stomatal closure
Source: eLife. 2020 May 28;9:e56351. doi: 10.7554/eLife.56351 (PMC7289597; doi:10.7554/eLife.56351)
Supplement: Figure 9—source data 1. [file elife-56351-fig9-data1.xlsx]

## Sheet: Figure 9a-b
																						Col-0
Col-0																					Abs average	Abs error	Rel average	Rel error
-17	144.699	1.00836	149.202	146.155	0.996287	167.066	163.32	1.1542	151.577	152.509	1.00533	194.069	190.468	1.00564	100.704	102.212	1.00208	118.516	118.774	0.889026	145.448	10.8868	1.0087	0.0291595
-14	144.952	1.01012	143.054	145.031	0.988623	159.834	158.878	1.12281	151.023	150.77	0.993872	186.866	189.906	1.00267	97.1471	97.7802	0.958629	121.389	122.007	0.913228	144.189	10.9068	0.998565	0.0241945
-11	144.149	1.00452	142.837	144.153	0.982636	149.734	152.54	1.07802	149.712	154.042	1.01544	188.783	188.121	0.993248	95.4897	96.8966	0.949967	126.116	125.863	0.942086	143.681	10.5418	0.995131	0.0171719
-8	143.456	0.999695	146.567	145.086	0.988998	148.053	146.664	1.0365	161.39	154.215	1.01658	188.714	188.116	0.993222	98.0531	98.8115	0.96874	130.083	129.384	0.96844	143.676	10.1349	0.996025	0.00930534
-5	142.988	0.996434	145.854	146.656	0.999703	142.207	143.385	1.01332	151.544	154.957	1.02147	186.852	189.142	0.998636	102.892	100.686	0.987118	131.952	132.417	0.991147	144.319	9.97118	1.00112	0.00459969
-2	143.483	1	147.549	146.701	1	139.897	141.052	1	151.935	151.74	1	191.859	189.355	1	101.113	102.003	1	135.217	133.584	1	143.988	9.76576	1	0
1	142.7	0.994425	145.937	145.937	0.994801	137.561	137.561	0.972165	150.309	150.309	0.99083	162.64	162.64	0.858712	103.288	103.288	1.01263	135.226	135.226	1.01217	139.666	6.96434	0.976533	0.0203143
4	105.49	0.735119	108.028	108.028	0.736387	106.922	106.922	0.755632	119.893	119.893	0.790329	133.316	133.316	0.703887	72.3461	72.3461	0.709275	110.375	110.375	0.82616	108.053	7.01467	0.75097	0.0166502
7	86.5148	0.602891	94.6911	94.6911	0.645475	87.8246	87.8246	0.620669	100.967	100.967	0.665568	123.149	123.149	0.650207	55.5698	55.5698	0.544802	96.092	96.092	0.719251	92.1155	7.63646	0.635552	0.020554
10	76.8658	0.53565	86.8887	86.8887	0.592289	78.7565	78.7565	0.556583	86.9134	86.9134	0.572929	121.253	121.253	0.640195	49.1801	49.1801	0.482157	86.4598	86.4598	0.647154	83.7596	8.01943	0.57528	0.0219667
13	73.4821	0.51207	81.5584	81.5584	0.555954	74.6735	74.6735	0.527728	80.8497	80.8497	0.532958	108.505	108.505	0.57289	45.1708	45.1708	0.442851	78.9069	78.9069	0.590621	77.5924	7.00383	0.533582	0.0182761
16	70.8664	0.493843	83.3965	83.3965	0.568483	69.9278	69.9278	0.494189	79.3708	79.3708	0.523209	112.084	112.084	0.591782	44.6984	44.6984	0.438219	75.1614	75.1614	0.562585	76.5007	7.57511	0.524616	0.0202464
19	71.3666	0.497328	77.3248	77.3248	0.527095	69.385	69.385	0.490353	78.8814	78.8814	0.519983	111.285	111.285	0.587567	44.4709	44.4709	0.435989	73.4153	73.4153	0.549516	75.1613	7.4261	0.515404	0.0181198
22	75.0338	0.522884	80.4676	80.4676	0.548518	69.4194	69.4194	0.490597	77.1744	77.1744	0.50873	104.94	104.94	0.554065	45.3599	45.3599	0.444705	72.183	72.183	0.540292	74.9397	6.63434	0.515684	0.0145768
25	75.1905	0.523975	79.9666	79.9666	0.545103	67.8855	67.8855	0.479756	77.1905	77.1905	0.508836	104.425	104.425	0.551345	45.1218	45.1218	0.442371	71.5828	71.5828	0.5358	74.4803	6.63402	0.512455	0.0148405
28	74.5353	0.51941	83.804	83.804	0.571261	65.9103	65.9103	0.465797	79.4494	79.4494	0.523727	103.194	103.194	0.544845	46.593	46.593	0.456794	70.6699	70.6699	0.528966	74.8794	6.54769	0.515829	0.0155462
31	76.5659	0.53356	82.4655	82.4655	0.562137	64.3315	64.3315	0.45464	78.7165	78.7165	0.518896	100.73	100.73	0.53184	46.1147	46.1147	0.452105	70.6286	70.6286	0.528657	74.2219	6.35666	0.511691	0.0158671
34	77.982	0.543429	83.5636	83.5636	0.569622	65.8406	65.8406	0.465304	79.9743	79.9743	0.527187	99.555	99.555	0.525633	47.4848	47.4848	0.465537	71.5581	71.5581	0.535615	75.1369	6.09961	0.518904	0.0148708
37	79.6427	0.555001	81.9263	81.9263	0.558461	64.688	64.688	0.457159	77.7247	77.7247	0.512358	100.52	100.52	0.530727	48.054	48.054	0.471117	70.7788	70.7788	0.529781	74.762	6.12966	0.516372	0.0148162
40	75.515	0.526237	81.5258	81.5258	0.555732	63.7103	63.7103	0.450249	75.8917	75.8917	0.500275	98.4076	98.4076	0.519576	45.2653	45.2653	0.443777	72.5708	72.5708	0.543195	73.2695	6.14917	0.505577	0.0165197
43	77.6572	0.541165	84.0183	84.0183	0.572722	63.5103	63.5103	0.448836	75.8694	75.8694	0.500128	104.489	104.489	0.551682	46.7989	46.7989	0.458812	69.231	69.231	0.518196	74.5105	6.75708	0.513077	0.0176623
46	77.3881	0.53929	83.3628	83.3628	0.568253	63.2612	63.2612	0.447076	78.0967	78.0967	0.51481	108.148	108.148	0.571005	46.603	46.603	0.456892	70.4447	70.4447	0.52728	75.3292	7.15179	0.517801	0.0186755
49	77.0661	0.537046		83	0.565781	64.0966	64.0966	0.452979	76.8075	76.8075	0.506312	101.803	101.803	0.537504	46	46	0.45098	70.3866	70.3866	0.526846	74.1657	6.48487	0.511064	0.0166358
	72.116			69.3765			71.6669			72.8582			78.0702			57.5317			60.1691
															pyl-12458
pyl-12458															Abs average	Abs error	Rel average	Rel error
-17	527.574	1.02243	423.398	456.231	1.00029	463.476	465.262	1.06932	331.699	329.669	0.972761	327.974	365.116	0.974943	428.77	35.8615	1.00795	0.0178361
-14	531.928	1.03087	489.065	462.24	1.01346	442.136	444.764	1.02221	322.743	328.628	0.96969	385.586	366.252	0.977976	426.762	36.0101	1.00284	0.0122287
-11	520.297	1.00833	474.258	467.898	1.02587	428.68	436.111	1.00232	331.441	328.151	0.968283	385.196	384.565	1.02687	427.404	33.1896	1.00634	0.0106568
-8	515.523	0.999075	440.37	454.919	0.99741	437.517	433.763	0.996928	330.269	333.938	0.985359	382.912	380.72	1.01661	423.773	31.1542	0.999076	0.00501478
-5	511.564	0.991404	450.128	450.86	0.988511	435.094	435.931	1.00191	340.104	336.048	0.991585	374.053	377.319	1.00753	422.345	30.358	0.996188	0.00363576
-2	515.999	1	462.081	456.104	1	435.184	435.139	1	337.772	338.938	1	374.994	374.523	1	424.141	31.0661	1	0
1	506.574	0.981733	451.712	451.712	0.99038	441.003	441.003	1.01357	325.033	325.033	0.959082	375.228	375.228	1.00194	419.91	31.5952	0.989341	0.00927425
4	414.349	0.803001	436.069	436.069	0.956082	399.798	399.798	0.918865	283.742	283.742	0.837245	326.485	326.485	0.871789	372.089	28.7507	0.877397	0.0274676
7	339.097	0.657165	373.423	373.423	0.818731	347.477	347.477	0.798614	251.178	251.178	0.741157	276.999	276.999	0.73965	317.635	22.947	0.751063	0.0281827
10	312.938	0.60647	355.159	355.159	0.778687	321.898	321.898	0.739826	238.053	238.053	0.702428	251.544	251.544	0.671679	295.918	22.1265	0.699818	0.0294393
13	301.282	0.583879	341.907	341.907	0.749632	303.772	303.772	0.698167	230.828	230.828	0.681108	228.497	228.497	0.610138	281.257	22.2634	0.664585	0.0300929
16	289.465	0.56098	316.353	316.353	0.693605	288.386	288.386	0.662803	220.82	220.82	0.651579	220.894	220.894	0.589837	267.184	19.5652	0.631761	0.0244425
19	286.731	0.55568	302.897	302.897	0.664103	276.303	276.303	0.635033	219.518	219.518	0.647737	210.421	210.421	0.561871	259.174	18.593	0.612885	0.0225869
22	289.921	0.561863	306.165	306.165	0.671267	268.222	268.222	0.61646	221.545	221.545	0.653717	207.356	207.356	0.553688	258.642	19.1507	0.611399	0.0236484
25	284.275	0.550921	291.721	291.721	0.639598	262.868	262.868	0.604155	224.747	224.747	0.663166	203.981	203.981	0.544675	253.518	16.992	0.600503	0.0234984
28	287.224	0.556637	289.249	289.249	0.63418	259.21	259.21	0.595748	223.632	223.632	0.659875	199.215	199.215	0.53195	251.706	17.707	0.595678	0.0236528
31	292.891	0.567617	281.204	281.204	0.616541	255.991	255.991	0.588349	219.427	219.427	0.64747	195.333	195.333	0.521583	248.969	18.3944	0.588312	0.0214214
34	294.902	0.571516	287.076	287.076	0.629415	252.521	252.521	0.580374	224.327	224.327	0.661927	192.718	192.718	0.514601	250.309	19.1534	0.591567	0.025332
37	294.974	0.571655	282.104	282.104	0.618514	252.526	252.526	0.580387	216.665	216.665	0.639318	194.402	194.402	0.519098	248.134	19.0325	0.585794	0.020752
40	289.317	0.560693	275.783	275.783	0.604656	248.111	248.111	0.570238	225.9	225.9	0.666568	191.915	191.915	0.512456	246.205	17.4599	0.582922	0.0255827
43	293.295	0.5684	275.449	275.449	0.603922	246.371	246.371	0.56624	221.045	221.045	0.652242	182.588	182.588	0.487551	243.749	19.6503	0.575671	0.026989
46	301.698	0.584686	274.336	274.336	0.601481	250.841	250.841	0.576514	212.031	212.031	0.625644	182.514	182.514	0.487354	244.284	21.3287	0.575136	0.0234988
49	289.898	0.561818	268.739	268.739	0.589212	248.375	248.375	0.570846	216.696	216.696	0.639409	175.594	175.594	0.468877	239.861	20.096	0.566032	0.0277502
	229.268			153.207			158.836			119.42			164.103
																					pyl-11458
pyl-11458																					Abs average	Abs error	Rel average	Rel error
-17	339.435	1.03803	727.485	578.046	1.35089	362.485	361.034	1.05766	295.566	315.686	0.949604	300.747	305.917	1.01972	343.492	345.715	0.980196	260.703	280.015	1.05826	360.836	37.624	1.06491	0.0500282
-14	338.051	1.03379	428.608	541.232	1.26486	366.091	360.704	1.0567	335.807	321.974	0.968517	304.906	301.267	1.00422	345.955	345.653	0.98002	284.277	273.095	1.0321	354.568	33.0133	1.0486	0.0379254
-11	337.202	1.0312	467.605	457.023	1.06806	353.536	355.483	1.0414	334.549	334.36	1.00578	298.146	300.698	1.00233	347.512	347.895	0.986376	274.305	276.299	1.04421	344.137	21.5577	1.02562	0.0108053
-8	329.899	1.00887	474.858	456.664	1.06722	346.822	347.327	1.01751	332.724	333.998	1.00469	299.042	297.999	0.993332	350.217	349.154	0.989945	270.315	269.897	1.02002	340.705	22.1257	1.01451	0.00975661
-5	328.497	1.00458	427.528	443.574	1.03663	341.624	343.174	1.00534	334.721	332.536	1.00029	296.81	299.721	0.99907	349.732	351.896	0.99772	265.07	266.509	1.00722	337.987	20.7377	1.00726	0.00507136
-2	327.023	1	428.336	427.932	1	341.077	341.351	1	330.162	332.441	1	303.311	300.061	1	355.739	352.735	1	264.143	264.606	1	335.164	19.0471	1	0
1	328.87	1.00572	426.081	426.081	0.995749	335.099	335.099	0.981688	331.342	331.342	0.996698	306.259	306.259	1.02086	346.638	346.638	0.982813	250.927	250.927	0.948326	332.174	19.7126	0.990265	0.00863903
4	264.344	0.808391	379.544	379.544	0.886993	299.703	299.703	0.877993	294.595	294.595	0.88616	257.852	257.852	0.859508	301.464	301.464	0.854733	196.415	196.415	0.742308	284.845	21.0038	0.845155	0.0199624
7	241.817	0.739502	343.914	343.914	0.803724	271.227	271.227	0.794572	281.008	281.008	0.845289	246.69	246.69	0.822299	277.47	277.47	0.786702	161.319	161.319	0.609672	260.492	20.7926	0.77168	0.0296965
10	226.1	0.691437	324.928	324.928	0.759354	251.625	251.625	0.737146	274.24	274.24	0.82493	237.191	237.191	0.790638	271.913	271.913	0.770948	145.735	145.735	0.550777	247.39	20.8414	0.732176	0.0341053
13	216.237	0.661276	316.435	316.435	0.739506	238.434	238.434	0.698503	274.656	274.656	0.826183	229.026	229.026	0.76342	271.211	271.211	0.768955	135.842	135.842	0.513385	240.263	21.5768	0.710175	0.0383784
16	217.847	0.6662	298.235	298.235	0.696975	240.081	240.081	0.703329	281.058	281.058	0.845438	228.135	228.135	0.76045	267.925	267.925	0.75964	130.195	130.195	0.492046	237.64	20.9912	0.70344	0.0416013
19	214.938	0.657303	304.694	304.694	0.712068	233.911	233.911	0.685251	275.175	275.175	0.827742	225.391	225.391	0.751302	272.094	272.094	0.77146	127.271	127.271	0.480995	236.21	21.7882	0.698017	0.0420256
22	219.145	0.670168	295.483	295.483	0.690543	229.796	229.796	0.673198	276.558	276.558	0.831903	224.79	224.79	0.749299	267.748	267.748	0.759137	125.672	125.672	0.474951	234.17	21.1503	0.692743	0.0423427
25	216.422	0.661842	286.416	286.416	0.669353	229.729	229.729	0.673001	277.388	277.388	0.834401	225.358	225.358	0.751194	269.542	269.542	0.764225	120.85	120.85	0.456727	232.244	21.312	0.687249	0.0452447
28	212.127	0.648705	279.868	279.868	0.65405	227.452	227.452	0.666332	279.839	279.839	0.841774	224.89	224.89	0.749634	261.979	261.979	0.74278	123.67	123.67	0.467386	229.975	20.5006	0.681523	0.0441828
31	212.36	0.649419	282.869	282.869	0.661062	225.866	225.866	0.661685	271.49	271.49	0.81666	220.379	220.379	0.734597	268.721	268.721	0.761897	119.03	119.03	0.449851	228.674	21.1224	0.676453	0.0444206
34	208.771	0.638444	283.339	283.339	0.662163	221.558	221.558	0.649065	272.803	272.803	0.820607	224.555	224.555	0.748516	264.371	264.371	0.749565	117.44	117.44	0.443838	227.548	21.2905	0.673171	0.0457092
37	209.924	0.641968	277.288	277.288	0.648021	216.217	216.217	0.633418	270.671	270.671	0.814194	223.429	223.429	0.744764	266.669	266.669	0.756078	114.243	114.243	0.431756	225.491	21.3411	0.667171	0.0470821
40	205.172	0.627437	275.164	275.164	0.643057	216.413	216.413	0.633992	269.503	269.503	0.810681	221.746	221.746	0.739154	236.393	236.393	0.670238	111.325	111.325	0.420728	219.388	20.59	0.649327	0.0456572
43	205.529	0.628528	272.777	272.777	0.63748	212.568	212.568	0.622727	267.731	267.731	0.805353	219.863	219.863	0.732877	263.882	263.882	0.748176	111.447	111.447	0.421192	221.971	21.2751	0.656619	0.0473211
46	205.661	0.628932	273.535	273.535	0.63925	210.04	210.04	0.615322	266.945	266.945	0.802986	212.391	212.391	0.707969	254.503	254.503	0.721586	109.465	109.465	0.413699	218.934	21.1756	0.647106	0.0461446
49	202.074	0.617963	274.783	274.783	0.642166	211.912	211.912	0.620805	258.74	258.74	0.778305	210.992	210.992	0.703306	261.172	261.172	0.740493	108.579	108.579	0.410351	218.322	21.3027	0.64477	0.0454272
	112.084			123.238			107.44			57.2667			74.67			80.6416			137.335
															pyl-112458
pyl-112458			2019-12-18				2019-12-20			2019-12-20			2019-12-20		Abs average	Abs error	Rel average	Rel error
-17	879.137	1.03185	643.328	652.149	1.01851	822.578	830.468	0.996123	800.621	805.153	1.01738	649.42	647.722	1.01349	762.926	47.6412	1.01547	0.00574193
-14	887.799	1.04202	664.708	653.217	1.02017	838.359	830.857	0.99659	808.682	799.73	1.01053	646.023	650.676	1.01811	764.456	48.0555	1.01748	0.0073976
-11	884.335	1.03795	651.615	653.227	1.02019	831.635	821.816	0.985746	789.885	797.125	1.00723	656.585	651.325	1.01913	761.566	46.8279	1.01405	0.00860921
-8	862.382	1.01219	643.357	646.277	1.00933	795.455	817.579	0.980664	792.807	790.938	0.999416	651.368	648.242	1.0143	753.084	44.6869	1.00318	0.0061801
-5	844.335	0.991004	643.858	641.304	1.00157	825.649	820.984	0.984747	790.122	791.859	1.00058	636.773	643.205	1.00642	748.337	44.0999	0.996864	0.00392735
-2	852.065	1	636.697	640.277	1	841.847	833.748	1	792.647	791.384	1	641.474	639.124	1	751.32	46.6195	1	0
1	846.26	0.993263	614.18	614.18	0.959207	811.843	811.843	0.973783	792.835	792.835	1.00181	631.428	631.428	0.987996	739.309	48.4046	0.983212	0.00753343
4	779.198	0.914552	577.611	577.611	0.902094	779.884	779.884	0.935449	767.567	767.567	0.969885	625.524	625.524	0.978757	705.957	43.3402	0.940148	0.0150004
7	664.995	0.780511	495.148	495.148	0.773306	759.797	759.797	0.911355	709.362	709.362	0.896338	626.941	626.941	0.980975	651.249	44.8927	0.868497	0.0400414
10	633.311	0.743323	456.492	456.492	0.712934	746.862	746.862	0.89584	666.554	666.554	0.842246	591.127	591.127	0.924936	618.869	47.9586	0.823856	0.041549
13	578.881	0.679437	434.084	434.084	0.677939	729.21	729.21	0.874668	636.461	636.461	0.804222	573.313	573.313	0.897063	590.39	48.0881	0.786666	0.0466689
16	543.461	0.637865	395.496	395.496	0.617674	694.303	694.303	0.832797	610.583	610.583	0.771522	545.134	545.134	0.852972	557.795	49.0549	0.742566	0.0488518
19	525.113	0.616329	376.54	376.54	0.588068	666.859	666.859	0.799878	594.508	594.508	0.751211	540.021	540.021	0.844971	540.608	47.96	0.720092	0.0505599
22	523.968	0.614986	368.409	368.409	0.57537	679.32	679.32	0.814826	571.037	571.037	0.721552	525.086	525.086	0.821602	533.564	50.0446	0.709667	0.0503634
25	497.284	0.583667	361.304	361.304	0.564273	685.129	685.129	0.821794	559.699	559.699	0.707227	510.956	510.956	0.799494	522.875	52.242	0.695291	0.0532114
28	515.105	0.604583	338.452	338.452	0.528584	658.725	658.725	0.790122	548.918	548.918	0.693604	511.528	511.528	0.800388	514.546	51.4721	0.683456	0.0526118
31	489.302	0.574298	330.669	330.669	0.516428	650.75	650.75	0.780556	520.166	520.166	0.657273	499.084	499.084	0.780916	497.994	50.9414	0.661894	0.0534331
34	491.476	0.57685	326.368	326.368	0.509712	635.636	635.636	0.762428	534.135	534.135	0.674924	486.841	486.841	0.76176	494.891	49.9128	0.657135	0.0502637
37	492.419	0.577957	316.208	316.208	0.493844	629.535	629.535	0.75511	512.445	512.445	0.647517	490.83	490.83	0.768002	488.288	50.0846	0.648486	0.0522218
40	516.773	0.606541	308.918	308.918	0.482459	623.96	623.96	0.748423	512.896	512.896	0.648087	486.248	486.248	0.760832	489.759	50.9856	0.649268	0.0509561
43	486.383	0.570872	317.987	317.987	0.496623	618.062	618.062	0.741348	518.058	518.058	0.654609	480.105	480.105	0.75122	484.119	48.3288	0.642934	0.049065
46	486.191	0.570647	302.868	302.868	0.473009	624.647	624.647	0.749247	515.034	515.034	0.650789	482.367	482.367	0.75476	482.222	51.7423	0.63969	0.0538128
49	527.082	0.618641	303.359	303.359	0.473777	599.296	599.296	0.718839	509.831	509.831	0.644214	481.778	481.778	0.753838	484.269	49.22	0.641862	0.0486115
	326.953			263.738			166.889			196.876			99.1029

## Sheet: Figure 9c-d
Line	gs0	gs50	halfresponse time
Col	143.483	77.0661	3.86392
Col	146.701	83	3.68557
Col	141.052	64.0966	4.74933
Col	151.74	76.8075	4.96745
Col	189.355	101.803	2.91921
Col	102.003	46	3.91211
Col	133.584	70.3866	5.88838
p12458	515.999	289.898	4.56608
p12458	456.104	268.739	8.80992
p12458	435.139	248.375	7.79032
p12458	338.938	216.696	4.76044
p12458	374.523	175.594	7.22692
p11458	327.023	202.074	3.98936
p11458	427.932	274.783	6.45746
p11458	341.351	211.912	6.52925
p11458	332.441	258.74	3.91865
p11458	300.061	210.992	4.62931
p11458	352.735	261.172	4.86256
p11458	264.606	108.579	4.83843
p112458	852.065	527.082	6.89176
p112458	640.277	303.359	8.82924
p112458	833.748	599.296	14.0904
p112458	791.384	509.831	11.5895
p112458	639.124	481.778	14.4574
