# Supplementary figures and images for: FRET kinase sensor development reveals SnRK2/OST1 activation by ABA but not by MeJA and high CO2 during stomatal closure
Source: eLife journal article supplement (doi:10.7554/elife.56351), 2020-05-28

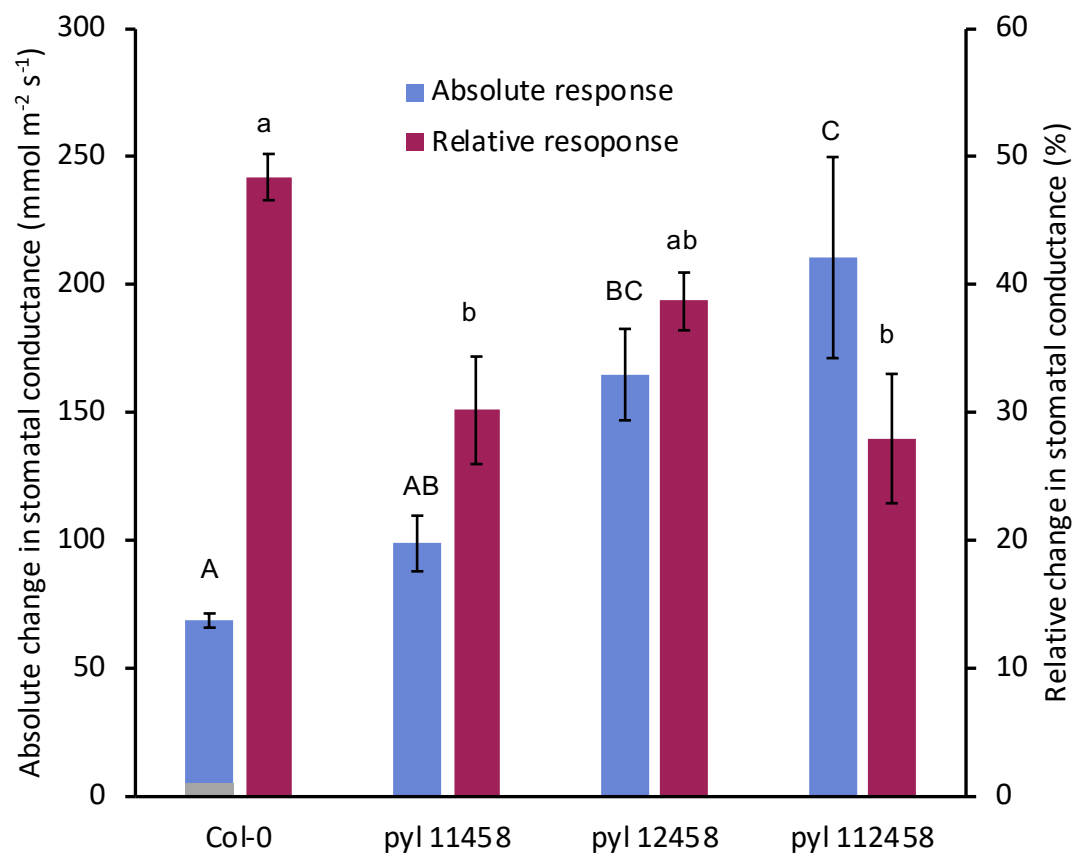

Supplement: supp [file elife-56351-supp-v1.zip]
